# Supplementary material for: GEOLOGI DAN MINERALISASI BIJIHDAERAH DUSUN DAROK, DESA BANTAI, KECAMATAN BONTI, KABUPATEN SANGGAU, KALIMANTAN BARAT
Source: MDPI journal article supplement (doi:10.3390/nu14051047), 2013-01-01
Supplement: s1 [file s1]

**Supplementary Table S2.** Nutrient composition of each diet used in the study.

| Nutrient<br>information | Diet of different groups |                        |                  |                        |                    |                           |                    |                        |                       |                        |                           |                        |
|-------------------------|--------------------------|------------------------|------------------|------------------------|--------------------|---------------------------|--------------------|------------------------|-----------------------|------------------------|---------------------------|------------------------|
|                         | SCD                      |                        | HFD <sup>b</sup> |                        | HFD+R <sup>a</sup> |                           | HFD+W <sup>a</sup> |                        | HFD+A <sup>b, c</sup> |                        | HFD+Atorv <sup>b, d</sup> |                        |
|                         | Per 100<br>g             | Per 20 g<br>daily dose | Per 100<br>g     | Per 20 g<br>daily dose | Per 100<br>g       | Per 20 g<br>daily<br>dose | Per 100<br>g       | Per 20 g<br>daily dose | Per 100 g             | Per 20 g<br>daily dose | Per 100<br>g              | Per 20 g<br>daily dose |
| <b>Protein</b>          | 14.3                     | 2.9                    | 16.6             | 3.3                    | 13.7               | 2.7                       | 13.6               | 2.7                    | 16.6                  | 3.3                    | 16.6                      | 3.3                    |
| <b>Carbohydrate</b>     | 48.0                     | 9.6                    | 47.2             | 9.4                    | 58.6               | 11.7                      | 58.3               | 11.7                   | 51.7                  | 10.3                   | 47.2                      | 9.4                    |
| <b>Fat</b>              | 4.0                      | 0.8                    | 16.9             | 3.4                    | 16.1               | 3.2                       | 16.1               | 3.2                    | 16.9                  | 3.4                    | 16.9                      | 3.4                    |
| <b>Kcal</b>             | 290.0                    | 58.0                   | 410.0            | 82.0                   | 396.3              | 79.3                      | 406.6              | 81.3                   | 428.0                 | 85.6                   | 410.0                     | 82.0                   |
| <b>Fiber</b>            | 4.12                     | 0.82                   | 1.03             | 0.21                   | 4.13               | 0.83                      | 3.47               | 0.69                   | 1.03                  | 0.21                   | 1.03                      | 0.21                   |

SCD, standard chow diet; HFD, high-fat diet; HFD+R, HFD + red-fleshed apple; HFD+W, HFD + white-fleshed apple; HFD+A, HFD + Aronia extract infusion; HFD+Atorv, HFD + Atorvastatin

<sup>a</sup> Composed by 75% HFD + 25% apple snack (white or red-fleshed)

<sup>b</sup> Composed by 75% HFD + 25% SCD

<sup>c</sup> 100 g feed + 1 L of aronia extract infusion (daily dose: 20 g feed + 20 mL of aronia extract infusion)

<sup>d</sup> 4 mg Atorvastatin/day in the water
