# Supplementary material for: GEOLOGI DAN MINERALISASI BIJIHDAERAH DUSUN DAROK, DESA BANTAI, KECAMATAN BONTI, KABUPATEN SANGGAU, KALIMANTAN BARAT
Source: MDPI journal article supplement (doi:10.3390/nu14051047), 2013-01-01
Supplement: s1 [file s1]

**Supplementary Table S3.** Biochemical parameters of rat plasma from de different groups studied.

|                                     |                  | TC<br>(mg/dL) |   |            |                        | TG<br>(mg/dL) |   |            |           | HDLc (mg/dL) |   |           |           | non-HDLc(mg/dL) |   |            |                        | ALT<br>(U/L) |   |            |                        | AST<br>(U/L) |   |            |                        | Insulin (ug/L) |   |          |                         | Glucose (mg/dL) |   |           |           |
|-------------------------------------|------------------|---------------|---|------------|------------------------|---------------|---|------------|-----------|--------------|---|-----------|-----------|-----------------|---|------------|------------------------|--------------|---|------------|------------------------|--------------|---|------------|------------------------|----------------|---|----------|-------------------------|-----------------|---|-----------|-----------|
|                                     |                  | mea<br>n      | ± | SD         | <i>p</i>               | mea<br>n      | ± | SD         | <i>p</i>  | mea<br>n     | ± | SD        | <i>p</i>  | mea<br>n        | ± | SD         | <i>p</i>               | mea<br>n     | ± | SD         | <i>p</i>               | mea<br>n     | ± | SD         | <i>p</i>               | me<br>an       | ± | SD       | <i>p</i>                | mea<br>n        | ± | SD        | <i>p</i>  |
| SCD                                 | Females<br>(n=3) | 69,2<br>2     | ± | 7,72       |                        | 56,3<br>9     | ± | 29,3<br>0  |           | 52,<br>46    | ± | 2,8<br>3  |           | 16,7<br>6       | ± | 6,14       |                        | 43,3<br>3    | ± | 16,1<br>7  |                        | 170,<br>00   | ± | 88,6<br>1  |                        | 0,4<br>6       | ± | 0,1<br>0 |                         | 221,<br>67      | ± | 18,<br>56 |           |
|                                     | Males<br>(n=3)   | 73,4<br>7     | ± | 13,3<br>0  |                        | 140,<br>53    | ± | 90,8<br>5  |           | 54,<br>59    | ± | 7,2<br>7  |           | 18,8<br>8       | ± | 7,09       |                        | 44,3<br>3    | ± | 10,0<br>7  |                        | 179,<br>00   | ± | 1,73       |                        | 0,8<br>4       | ± | 0,1<br>3 |                         | 264,<br>00      | ± | 39,<br>85 |           |
|                                     | Total<br>(N=6)   | 71,3<br>5     | ± | 10,0<br>0  |                        | 98,4<br>6     | ± | 75,9<br>5  |           | 53,<br>53    | ± | 5,0<br>7  |           | 17,8<br>2       | ± | 6,05       |                        | 43,8<br>3    | ± | 12,0<br>6  |                        | 174,<br>50   | ± | 56,2<br>7  |                        | 0,6<br>1       | ± | 0,2<br>3 |                         | 242,<br>83      | ± | 36,<br>20 |           |
|                                     |                  |               |   |            |                        |               |   |            |           |              |   |           |           |                 |   |            |                        |              |   |            |                        |              |   |            |                        |                |   |          |                         |                 |   |           |           |
| HFD                                 | Females<br>(n=3) | 425,<br>89    | ± | 146,<br>85 | 0,05<br>2              | 129,<br>90    | ± | 51,4<br>1  | 0,0<br>98 | 47,<br>36    | ± | 12,<br>40 | 0,5<br>25 | 378,<br>53      | ± | 147,<br>16 | 0,01<br>3 <sup>a</sup> | 109,<br>67   | ± | 50,8<br>2  | 0,09<br>7              | 447,<br>33   | ± | 145,<br>96 | 0,04<br>8 <sup>a</sup> | 1,2<br>4       | ± | 0,6<br>6 | 0,113                   | 225,<br>33      | ± | 22,<br>94 | 0,8<br>40 |
|                                     | Males<br>(n=3)   | 224,<br>03    | ± | 61,7<br>6  | 0,04<br>6 <sup>a</sup> | 151,<br>45    | ± | 42,9<br>5  | 0,8<br>60 | 36,<br>30    | ± | 11,<br>92 | 0,0<br>86 | 187,<br>73      | ± | 52,8<br>2  | 0,02<br>9 <sup>a</sup> | 188,<br>67   | ± | 70,0<br>1  | 0,02<br>4 <sup>a</sup> | 313,<br>67   | ± | 76,8<br>3  | 0,09<br>3              | 5,2<br>7       | ± | 0,3<br>4 | <0,00<br>1 <sup>a</sup> | 210,<br>67      | ± | 11,<br>24 | 0,0<br>90 |
|                                     | Total<br>(N=6)   | 324,<br>96    | ± | 149,<br>58 | 0,00<br>9 <sup>a</sup> | 140,<br>68    | ± | 43,9<br>8  | 0,2<br>66 | 41,<br>83    | ± | 12,<br>45 | 0,0<br>59 | 283,<br>13      | ± | 143,<br>87 | 0,00<br>6 <sup>a</sup> | 149,<br>17   | ± | 69,7<br>6  | 0,01<br>3 <sup>a</sup> | 380,<br>50   | ± | 127,<br>45 | 0,00<br>5 <sup>a</sup> | 3,2<br>6       | ± | 2,2<br>5 | 0,035<br><sup>a</sup>   | 218,<br>00      | ± | 18,<br>04 | 0,1<br>64 |
|                                     |                  |               |   |            |                        |               |   |            |           |              |   |           |           |                 |   |            |                        |              |   |            |                        |              |   |            |                        |                |   |          |                         |                 |   |           |           |
| HFD +<br>red-<br>fleshed<br>apple   | Females<br>(n=3) | 547,<br>57    | ± | 306,<br>95 | ns                     | 215,<br>52    | ± | 143,<br>73 | ns        | 44,<br>81    | ± | 23,<br>46 | ns        | 502,<br>76      | ± | 288,<br>71 | ns                     | 101,<br>33   | ± | 48,4<br>2  | ns                     | 380,<br>00   | ± | 93,7<br>4  | ns                     | 1,3<br>3       | ± | 0,9<br>4 | ns                      | 278,<br>33      | ± | 62,<br>32 | ns        |
|                                     | Males<br>(n=3)   | 232,<br>54    | ± | 33,6<br>3  | ns                     | 88,2<br>7     | ± | 27,3<br>3  | ns        | 40,<br>55    | ± | 9,3<br>7  | ns        | 191,<br>98      | ± | 24,3<br>7  | ns                     | 209,<br>67   | ± | 40,3<br>8  | ns                     | 317,<br>67   | ± | 61,7<br>8  | ns                     | 3,2<br>2       | ± | 0,3<br>4 | ns                      | 236,<br>00      | ± | 14,<br>53 | ns        |
|                                     | Total<br>(N=6)   | 390,<br>05    | ± | 260,<br>60 | ns                     | 151,<br>90    | ± | 115,<br>84 | ns        | 42,<br>68    | ± | 16,<br>15 | ns        | 347,<br>37      | ± | 250,<br>11 | ns                     | 155,<br>50   | ± | 71,4<br>9  | ns                     | 348,<br>83   | ± | 78,7<br>9  | ns                     | 2,2<br>8       | ± | 1,2<br>1 | ns                      | 257,<br>17      | ± | 46,<br>65 | ns        |
|                                     |                  |               |   |            |                        |               |   |            |           |              |   |           |           |                 |   |            |                        |              |   |            |                        |              |   |            |                        |                |   |          |                         |                 |   |           |           |
| HFD +<br>white-<br>fleshed<br>apple | Females<br>(n=3) | 476,<br>80    | ± | 189,<br>68 | ns                     | 115,<br>14    | ± | 7,97       | ns        | 33,<br>46    | ± | 15,<br>60 | ns        | 443,<br>34      | ± | 174,<br>08 | ns                     | 107,<br>33   | ± | 61,4<br>4  | ns                     | 410,<br>00   | ± | 280,<br>38 | ns                     | 1,0<br>7       | ± | 0,7<br>4 | ns                      | 228,<br>00      | ± | 13,<br>23 | ns        |
|                                     | Males<br>(n=3)   | 226,<br>86    | ± | 41,0<br>0  | ns                     | 91,5<br>2     | ± | 29,8<br>0  | ns        | 55,<br>30    | ± | 27,<br>85 | ns        | 171,<br>57      | ± | 39,6<br>4  | ns                     | 241,<br>33   | ± | 101,<br>69 | ns                     | 493,<br>67   | ± | 218,<br>53 | ns                     | 3,4<br>9       | ± | 0,6<br>3 | ns                      | 227,<br>67      | ± | 13,<br>65 | ns        |
|                                     | Total<br>(N=6)   | 351,<br>83    | ± | 183,<br>86 | ns                     | 103,<br>33    | ± | 23,4<br>1  | ns        | 44,<br>38    | ± | 23,<br>47 | ns        | 307,<br>45      | ± | 186,<br>84 | ns                     | 174,<br>33   | ± | 105,<br>04 | ns                     | 451,<br>83   | ± | 229,<br>45 | ns                     | 2,5<br>2       | ± | 1,4<br>4 | ns                      | 227,<br>83      | ± | 12,<br>02 | ns        |
|                                     |                  |               |   |            |                        |               |   |            |           |              |   |           |           |                 |   |            |                        |              |   |            |                        |              |   |            |                        |                |   |          |                         |                 |   |           |           |
| HFD +<br>Aronia                     | Females<br>(n=3) | 535,<br>58    | ± | 156,<br>60 | ns                     | 211,<br>68    | ± | 68,6<br>5  | ns        | 40,<br>27    | ± | 2,6<br>0  | ns        | 495,<br>31      | ± | 154,<br>01 | ns                     | 88,6<br>7    | ± | 61,6<br>5  | ns                     | 358,<br>33   | ± | 197,<br>45 | ns                     | 1,3<br>9       | ± | 1,0<br>3 | ns                      | 260,<br>33      | ± | 44,<br>29 | ns        |
|                                     | Males<br>(n=3)   | 236,<br>02    | ± | 66,8<br>2  | ns                     | 137,<br>28    | ± | 84,1<br>2  | ns        | 43,<br>39    | ± | 13,<br>37 | ns        | 192,<br>63      | ± | 72,6<br>6  | ns                     | 246,<br>00   | ± | 23,5<br>2  | ns                     | 449,<br>67   | ± | 83,3<br>4  | ns                     | 2,0<br>8       | ± | 2,2<br>4 | 0,029<br>*              | 209,<br>33      | ± | 42,<br>34 | ns        |
|                                     | Total<br>(N=6)   | 385,<br>80    | ± | 196,<br>26 | ns                     | 174,<br>48    | ± | 79,8<br>5  | ns        | 41,<br>83    | ± | 8,7<br>8  | ns        | 343,<br>97      | ± | 197,<br>70 | ns                     | 167,<br>33   | ± | 95,7<br>5  | ns                     | 404,<br>00   | ± | 144,<br>48 | ns                     | 1,7<br>3       | ± | 1,6<br>0 | ns                      | 234,<br>83      | ± | 47,<br>77 | ns        |
|                                     |                  |               |   |            |                        |               |   |            |           |              |   |           |           |                 |   |            |                        |              |   |            |                        |              |   |            |                        |                |   |          |                         |                 |   |           |           |
| HFD +<br>Atorvasta<br>tina          | Females<br>(n=3) | 644,<br>50    | ± | 199,<br>53 | ns                     | 184,<br>82    | ± | 82,7<br>9  | ns        | 40,<br>84    | ± | 24,<br>26 | ns        | 603,<br>66      | ± | 179,<br>80 | ns                     | 145,<br>00   | ± | 87,4<br>8  | ns                     | 512,<br>33   | ± | 130,<br>22 | ns                     | 0,3<br>8       | ± | 0,0<br>8 | ns                      | 238,<br>33      | ± | 32,<br>13 | ns        |
|                                     | Males<br>(n=3)   | 220,<br>03    | ± | 50,1<br>6  | ns                     | 100,<br>08    | ± | 40,6<br>7  | ns        | 33,<br>75    | ± | 15,<br>69 | ns        | 186,<br>29      | ± | 38,1<br>3  | ns                     | 262,<br>33   | ± | 118,<br>56 | ns                     | 476,<br>33   | ± | 163,<br>69 | ns                     | 3,3<br>1       | ± | 0,3<br>0 | ns                      | 251,<br>67      | ± | 14,<br>57 | ns        |
|                                     | Total<br>(N=6)   | 432,<br>27    | ± | 266,<br>43 | ns                     | 142,<br>45    | ± | 74,5<br>5  | ns        | 37,<br>29    | ± | 18,<br>68 | ns        | 394,<br>98      | ± | 256,<br>46 | ns                     | 203,<br>67   | ± | 113,<br>20 | ns                     | 494,<br>33   | ± | 133,<br>75 | ns                     | 1,8<br>5       | ± | 1,6<br>2 | ns                      | 245,<br>00      | ± | 23,<br>48 | ns        |
|                                     |                  |               |   |            |                        |               |   |            |           |              |   |           |           |                 |   |            |                        |              |   |            |                        |              |   |            |                        |                |   |          |                         |                 |   |           |           |

SCD, standard chow diet; HFD, high fat diet; TC, total cholesterol; TG, triglycerides; HDLc, high-density lipoprotein cholesterol; nonHDLc, non-high-density lipoprotein cholesterol; ALT, alanine aminotransferase; AST, aspartate aminotransferase; ns, non significant

<sup>a</sup> HFD versus SCD student t-test
