# Supplementary material for: GEOLOGI DAN MINERALISASI BIJIHDAERAH DUSUN DAROK, DESA BANTAI, KECAMATAN BONTI, KABUPATEN SANGGAU, KALIMANTAN BARAT
Source: MDPI journal article supplement (doi:10.3390/nu14051047), 2013-01-01
Supplement: s1 [file s1]

**Supplementary Table S8.** Proteome changes on aorta or heart tissue of high-fat diet + Atorvastatina *versus* high-fat diet.

| Tissue | UniProt ID | Gene           | Protein name                                                     | FC     | <i>p</i> -value* |
|--------|------------|----------------|------------------------------------------------------------------|--------|------------------|
| AORTA  | A0A0G2JUZ3 | <i>Myopop</i>  | Myb-related transcription factor, partner of profilin            | 1.331  | 0.0047           |
|        | Q9QZR6     | <i>Sept9</i>   | Septin-9                                                         | -1.238 | 0.0086           |
|        | A0A0G2JW88 | <i>Map4</i>    | Microtubule-associated protein                                   | -1.582 | 0.0087           |
|        | Q9WUH4     | <i>Fhl1</i>    | Four and a half LIM domains protein 1                            | -1.465 | 0.0108           |
| HEART  | F1LN42     | <i>Tns1</i>    | Tensin 1                                                         | 1.297  | 0.0008           |
|        | Q4V8F6     | <i>Pcbp2</i>   | Pcbp2 protein                                                    | 1.245  | 0.0022           |
|        | P47942     | <i>Dpysl2</i>  | Dihydropyrimidinase-related protein 2                            | 1.188  | 0.0022           |
|        | G3V8L3     | <i>Lmna</i>    | Lamin A, isoform CRA_b                                           | 1.267  | 0.0023           |
|        | M0RAM5     | <i>Gpx1</i>    | Glutathione peroxidase                                           | 1.177  | 0.0065           |
|        | P56571     | <i>N/A</i>     | ES1 protein homolog, mitochondrial                               | 1.159  | 0.0148           |
|        | Q62651     | <i>Ech1</i>    | Delta(3,5)-Delta(2,4)-dienoyl-CoA isomerase, mitochondrial       | -1.298 | 0.0012           |
|        | Q9QZ76     | <i>Mb</i>      | Myoglobin                                                        | -1.727 | 0.0027           |
|        | P08010     | <i>Gstm2</i>   | Glutathione S-transferase Mu 2                                   | -1.354 | 0.0041           |
|        | P67779     | <i>Phb</i>     | Prohibitin                                                       | -1.142 | 0.0085           |
|        | P47727     | <i>Cbr1</i>    | Carbonyl reductase [NADPH] 1                                     | -1.300 | 0.0130           |
|        | D3ZLT1     | <i>Ndufb7</i>  | NADH dehydrogenase (Ubiquinone) 1 beta subcomplex, 7 (Predicted) | -1.613 | 0.0131           |
|        | P25113     | <i>Pgam1</i>   | Phosphoglycerate mutase 1                                        | -1.237 | 0.0148           |
|        | P19804     | <i>Nme2</i>    | Nucleoside diphosphate kinase B                                  | -1.356 | 0.0152           |
|        | D3ZF77     | <i>Akr1c15</i> | Aldo-keto reductase family 1 member C15                          | -1.235 | 0.0163           |
|        | P09605     | <i>Ckmt2</i>   | Creatine kinase S-type, mitochondrial                            | -1.499 | 0.0172           |

FC, fold change.

T-test or Wilcoxon test of pairwise comparisons was performed depending on each protein's distribution.

\*  $p < 0.02$  was considered statistically significant
