# Supplementary material for: GEOLOGI DAN MINERALISASI BIJIHDAERAH DUSUN DAROK, DESA BANTAI, KECAMATAN BONTI, KABUPATEN SANGGAU, KALIMANTAN BARAT
Source: MDPI journal article supplement (doi:10.3390/nu14051047), 2013-01-01
Supplement: s1 [file s1]

**Supplementary Table S4.** Animal performance (mean  $\pm$  standard deviation) according to diet treatment (n=3 females + n=3 males; global n=6)

|             | Increased weight (g) | <i>p</i> -value | Liquid intake (ml/day) | <i>p</i> -value | Food intake (g/day) | <i>p</i> -value |
|-------------|----------------------|-----------------|------------------------|-----------------|---------------------|-----------------|
| HFD         | 209 $\pm$ 87         |                 | 36 $\pm$ 7.8           |                 | 20 $\pm$ 2.7        |                 |
| SCD         | 187 $\pm$ 95         | 0.680           | 31 $\pm$ 4.3           | 0.208           | 22 $\pm$ 3.8        | 0.412           |
| HFD + R     | 196 $\pm$ 95         | 0.801           | 33 $\pm$ 11            | 0.553           | 19 $\pm$ 3.3        | 0.551           |
| HFD + W     | 213 $\pm$ 104        | 0.948           | 38 $\pm$ 5.1           | 0.674           | 21 $\pm$ 2.9        | 0.642           |
| HFD + A     | 227 $\pm$ 103        | 0.752           | 42 $\pm$ 3.8           | 0.521           | 18 $\pm$ 4.1        | 0.446           |
| HFD + Atorv | 229 $\pm$ 105        | 0.728           | 37 $\pm$ 2.8           | 0.805           | 19 $\pm$ 3.8        | 0.623           |

SCD, standard chow diet; HFD, high-fat diet; HFD+R, HFD + red-fleshed apple; HFD+W, HFD + white-fleshed apple; HFD+A, HFD + Aronia extract infusion; HFD+Atorv, HFD + Atorvastatin.

Data were analyzed using Student t-test comparing each treatment versus HFD.

\*  $p < 0.05$  was considered statistically significant.
