# Supplementary material for: GEOLOGI DAN MINERALISASI BIJIHDAERAH DUSUN DAROK, DESA BANTAI, KECAMATAN BONTI, KABUPATEN SANGGAU, KALIMANTAN BARAT
Source: MDPI journal article supplement (doi:10.3390/nu14051047), 2013-01-01
Supplement: s1 [file s1]

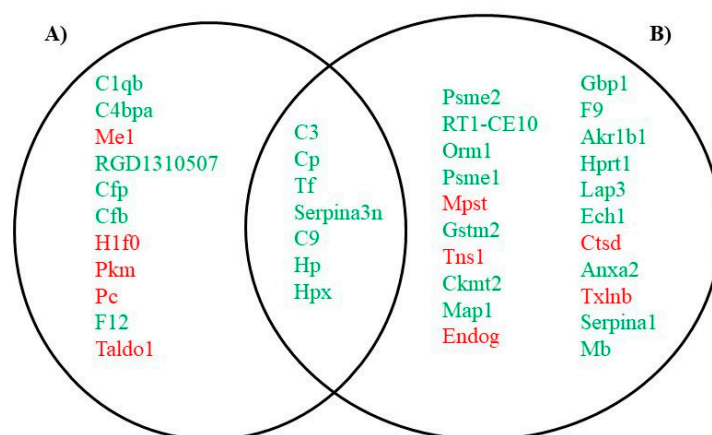

**Figure S2.** Venn diagram showing the significant protein changes after HFD + W versus HFD in the aorta and B) heart tissue. Protein coloured green indicate decreased expression, and protein coloured red indicate increased expression compared to expression in the HFD group.
