# Supplementary material for: GEOLOGI DAN MINERALISASI BIJIHDAERAH DUSUN DAROK, DESA BANTAI, KECAMATAN BONTI, KABUPATEN SANGGAU, KALIMANTAN BARAT
Source: MDPI journal article supplement (doi:10.3390/nu14051047), 2013-01-01
Supplement: s1 [file s1]

**Supplementary Table S1.** Phenolic composition of the main phenolics ( $\mu\text{g}$  phenolic/day/ rat) in the white-fleshed apple snack, red-fleshed apple snack, and Aronia extract infusion.

| Phenolic compounds                 | White-fleshed<br>apple snack<br>(mean $\pm$ SD) | Red-fleshed<br>apple snack<br>(mean $\pm$ SD) | Aronia extract infusion<br>(mean $\pm$ SD) |
|------------------------------------|-------------------------------------------------|-----------------------------------------------|--------------------------------------------|
| Cyanidin arabinoside               | 6.88 $\pm$ 6.12                                 | 167 $\pm$ 6.00                                | 480 $\pm$ 18.0                             |
| Cyanidin 3-O-galactoside           | 21.8 $\pm$ 18.1                                 | 1690 $\pm$ 36.0                               | 1426 $\pm$ 48.0                            |
| <b>Total Anthocyanins</b>          | <b>28.6 <math>\pm</math> 24.2</b>               | <b>1857 <math>\pm</math> 42.0</b>             | <b>1906 <math>\pm</math> 67.0</b>          |
| Protocatechuic acid                | n.d.                                            | 108 $\pm$ 67.3                                | 462 $\pm$ 65.0                             |
| Coumaric acid hexoside             | 48.7 $\pm$ 7.03                                 | 48.7 $\pm$ 7.03                               | 2.00 $\pm$ 0.00                            |
| Ferulic acid hexoside              | 67.3 $\pm$ 7.44                                 | 134 $\pm$ 16.4                                | 5.00 $\pm$ 0.00                            |
| Vanillic acid                      | n.d.                                            | n.d.                                          | 14.0 $\pm$ 1.00                            |
| Vanillic acid hexoside             | 58.2 $\pm$ 4.05                                 | 271 $\pm$ 7.24                                | 138 $\pm$ 22.0                             |
| 5-O-caffeoylquinic acid            | 1386 $\pm$ 28.08                                | 5004 $\pm$ 174                                | 814 $\pm$ 434                              |
| 3-O-caffeoylquinic acid            | n.d.                                            | n.d.                                          | 362 $\pm$ 97.0                             |
| Gallic acid                        | n.d.                                            | n.d.                                          | 36.0 $\pm$ 5.00                            |
| Gallic acid hexoside               | n.d.                                            | n.d.                                          | 25.0 $\pm$ 6.00                            |
| Caffeic acid                       | n.d.                                            | n.d.                                          | 32.0 $\pm$ 1.00                            |
| Homogentisic acid                  | n.d.                                            | n.d.                                          | 21.0 $\pm$ 7.00                            |
| <b>Total Phenolic acids</b>        | <b>1837 <math>\pm</math> 56.2</b>               | <b>5566 <math>\pm</math> 211</b>              | <b>1911 <math>\pm</math> 638</b>           |
| Catechin                           | 377 $\pm$ 25.3                                  | n.d.                                          | n.d.                                       |
| Epicatechin                        | 1867 $\pm$ 27.1                                 | 353 $\pm$ 49.3                                | 12.0 $\pm$ 1.00                            |
| Dimer                              | 3663 $\pm$ 121                                  | 438 $\pm$ 18.1                                | 32.0 $\pm$ 7.00                            |
| Trimer                             | 350 $\pm$ 51.6                                  | 82.0 $\pm$ 7.34                               | 8.00 $\pm$ 1.00                            |
| <b>Total Flavan-3-ols</b>          | <b>6259 <math>\pm</math> 226</b>                | <b>875 <math>\pm</math> 74.9</b>              | <b>52.0 <math>\pm</math> 9.00</b>          |
| Quercetin arabinoside              | 166 $\pm$ 24.3                                  | 232 $\pm$ 28.7                                | 5.00 $\pm$ 1.00                            |
| Quercetin rhamnoside               | 230 $\pm$ 26.6                                  | 587 $\pm$ 59.7                                | n.d.                                       |
| Quercetin glucoside                | 541 $\pm$ 81.0                                  | 279 $\pm$ 35.9                                | 133 $\pm$ 11.0                             |
| Quercetin rutinoside               | n.d.                                            | n.d.                                          | 87.0 $\pm$ 12.0                            |
| <b>Total Flavonols</b>             | <b>938 <math>\pm</math> 132</b>                 | <b>1098 <math>\pm</math> 124.5</b>            | <b>225 <math>\pm</math> 24.0</b>           |
| Eriodictyol hexoside               | n.d.                                            | 26.4 $\pm$ 1.42                               | 7.00 $\pm$ 2.00                            |
| Naringenin                         | n.d.                                            | n.d.                                          | n.d.                                       |
| <b>Total Flavanones</b>            | <b>n.d.</b>                                     | <b>26.4 <math>\pm</math> 1.42</b>             | <b>7.00 <math>\pm</math> 2.00</b>          |
| Phloretin glucoside                | 247 $\pm$ 34.5                                  | 1371 $\pm$ 160                                | n.d.                                       |
| Phloretin xylosyl glucoside        | 276 $\pm$ 17.6                                  | 739 $\pm$ 32.7                                | n.d.                                       |
| Hydroxyphloretin xylosyl glucoside | 14.2 $\pm$ 1.01                                 | 20.5 $\pm$ 1.52                               | n.d.                                       |
| <b>Total Dihydrochalcones</b>      | <b>536 <math>\pm</math> 53.1</b>                | <b>2130 <math>\pm</math> 195</b>              | <b>n.d.</b>                                |
| <b>TOTAL PHENOLICS</b>             | <b>9598 <math>\pm</math> 487</b>                | <b>11552 <math>\pm</math> 1420</b>            | <b>4101 <math>\pm</math> 740</b>           |

n.d., non-detected; SD, standard deviation.
