# Supplementary material for: GEOLOGI DAN MINERALISASI BIJIHDAERAH DUSUN DAROK, DESA BANTAI, KECAMATAN BONTI, KABUPATEN SANGGAU, KALIMANTAN BARAT
Source: MDPI journal article supplement (doi:10.3390/nu14051047), 2013-01-01
Supplement: s1 [file s1]

**Supplementary Table S7.** Proteome changes on aorta and heart tissue of high-fat diet *versus* standard chow diet.

| Tissue | UniProt ID | Gene            | Protein name                                                                | FC     | p-value* |
|--------|------------|-----------------|-----------------------------------------------------------------------------|--------|----------|
| AORTA  | P02680     | <i>Fgg</i>      | Fibrinogen gamma chain                                                      | 2.228  | < 0.001  |
|        | Q7TQ70     | <i>Fga</i>      | Ac1873                                                                      | 1.989  | 0.0010   |
|        | M0RBF1     | <i>C3</i>       | Complement C3                                                               | 1.489  | 0.0019   |
|        | A0A0G2K162 | <i>Epb41l2</i>  | Erythrocyte membrane protein band 4.1-like 2                                | 1.197  | 0.0022   |
|        | P49242     | <i>Rps3a</i>    | 40S ribosomal protein S3a                                                   | 1.302  | 0.0027   |
|        | Q9Z1Z9     | <i>Pdlim7</i>   | PDZ and LIM domain protein 7                                                | 1.239  | 0.0043   |
|        | A1L1M0     | <i>Prkaca</i>   | Protein kinase, cAMP-dependent, catalytic, alpha                            | 1.240  | 0.0064   |
|        | D4A5E5     | <i>Sgcb</i>     | Sarcoglycan, beta                                                           | 1.331  | 0.0085   |
|        | Q6P502     | <i>Cct3</i>     | T-complex protein 1 subunit gamma                                           | 1.622  | 0.0087   |
|        | G3V7N9     | <i>C1qb</i>     | Complement C1q subcomponent subunit B                                       | 2.001  | 0.0111   |
|        | P10860     | <i>Glud1</i>    | Glutamate dehydrogenase 1, mitochondrial                                    | 1.297  | 0.0118   |
|        | Q5RJR9     | <i>Serpinh1</i> | Serine (Or cysteine) proteinase inhibitor, clade H, member 1, isoform CRA_b | 1.093  | 0.0126   |
|        | D3ZFH5     | <i>Itih2</i>    | Inter-alpha-trypsin inhibitor heavy chain 2                                 | 1.698  | 0.0154   |
|        | P14046     | <i>Ali3</i>     | Alpha-1-inhibitor 3                                                         | 1.494  | 0.0166   |
|        | B5DEZ8     | <i>Plxdc2</i>   | Plexin domain containing 2 (Predicted)                                      | -1.122 | 0.0043   |
|        | Q5U2Q3     | <i>N/A</i>      | Ester hydrolase C11orf54 homolog                                            | -1.426 | 0.0049   |
|        | M0RAM5     | <i>Gpx1</i>     | Glutathione peroxidase                                                      | -1.144 | 0.0071   |
|        | B5DEN5     | <i>Eef1b2</i>   | Eukaryotic translation elongation factor 1 beta 2                           | -1.260 | 0.0111   |
|        | D4A0T0     | <i>Ndufb10</i>  | NADH:ubiquinone oxidoreductase subunit B10                                  | -1.397 | 0.0116   |
|        | P80254     | <i>Ddt</i>      | D-dopachrome decarboxylase                                                  | -1.466 | 0.0120   |
|        | P62775     | <i>Mtpn</i>     | Myotrophin                                                                  | -1.416 | 0.0122   |
|        | Q6P686     | <i>Ostf1</i>    | Osteoclast-stimulating factor 1                                             | -1.225 | 0.0152   |
|        | Q9WUC4     | <i>Atox1</i>    | Copper transport protein ATOX1                                              | -1.819 | 0.0165   |
|        | A0A0G2K6J5 | <i>Myl6</i>     | Myosin light polypeptide 6                                                  | -1.631 | 0.0167   |
|        | O08557     | <i>Ddah1</i>    | N(G),N(G)-dimethylarginine dimethylaminohydrolase 1                         | -1.365 | 0.0190   |
| HEART  | P09605     | <i>Ckmt2</i>    | Creatine kinase S-type, mitochondrial                                       | 1.532  | 0.0015   |

|            |                 |                                                                           |        |        |
|------------|-----------------|---------------------------------------------------------------------------|--------|--------|
| P08010     | <i>Gstm2</i>    | Glutathione S-transferase Mu 2                                            | 1.386  | 0.0034 |
| P16290     | <i>Pgam2</i>    | Phosphoglycerate mutase 2                                                 | 1.260  | 0.0053 |
| B4F789     | <i>ApoBec2</i>  | Apolipoprotein B editing complex 2 (Predicted), isoform CRA_a             | 1.403  | 0.0055 |
| Q62651     | <i>Ech1</i>     | Delta(3,5)-Delta(2,4)-dienoyl-CoA isomerase, mitochondrial                | 1.175  | 0.0083 |
| B0BNE6     | <i>Ndufs8</i>   | NADH dehydrogenase (Ubiquinone) Fe-S protein 8 (Predicted), isoform CRA_a | 1.427  | 0.0096 |
| P00173     | <i>Cyb5a</i>    | Cytochrome b5                                                             | 1.303  | 0.0100 |
| Q9QZ76     | <i>Mb</i>       | Myoglobin                                                                 | 1.609  | 0.0100 |
| D3ZPF0     | <i>Fhl3</i>     | Four and a half LIM domains 3                                             | 1.150  | 0.0139 |
| E9PU42     | <i>Vps26c</i>   | Down syndrome critical region gene 3 (Predicted), isoform CRA_c           | 1.679  | 0.0152 |
| A0A0G2JY31 | <i>Serpina1</i> | Alpha-1-antiproteinase                                                    | 1.234  | 0.0177 |
| P35053     | <i>Gpc1</i>     | Glypican-1                                                                | 1.291  | 0.0182 |
| Q4V8F6     | <i>Pcbp2</i>    | Pcbp2 protein                                                             | -1.273 | 0.0022 |
| P70623     | <i>Fabp4</i>    | Fatty acid-binding protein, adipocyte                                     | -1.346 | 0.0157 |
| F1LN42     | <i>Tns1</i>     | Tensin 1                                                                  | -1.280 | 0.0176 |
| P13086     | <i>Suclg1</i>   | Succinate--CoA ligase [ADP/GDP-forming] subunit alpha, mitochondrial      | -1.288 | 0.0196 |
| M0R7S5     | <i>Plin4</i>    | Perilipin 4                                                               | -1.497 | 0.0197 |

FC, fold change.

T-test or Wilcoxon test of pairwise comparisons was performed depending on each protein's distribution.

\*  $p < 0.02$  was considered statistically significant
