# Supplementary material for: Red-Fleshed Apples Rich in Anthocyanins and White-Fleshed Apples Modulate the Aorta and Heart Proteome in Hypercholesterolaemic Rats: The AppleCOR Study
Source: Nutrients. 2022 Feb 28;14(5):1047. doi: 10.3390/nu14051047 (PMC8912372; doi:10.3390/nu14051047)
Supplement: Supplementary file 1 [file nutrients-14-01047-s001.zip]

Archive with 10 entries (10 files):
- Supplementary Figure S1. Study design_rats_AppleCor.pdf
- Supplementary Figure S2.pdf
- Supplementary Table S1_Phenolic composition.pdf
- Supplementary Table S2_Daily Dose Nutrients Rats Applecor.pdf
- Supplementary Table S3.pdf
- Supplementary Table S4_ Animal performance t-test.pdf
- Supplementary Table S5_BBDD aorta.xlsx
- Supplementary Table S6_BBDD heart.xlsx
- Supplementary Table S7_HFD vs SCD.pdf
- Supplementary Table S8_HFD+Atorv versus HFD.pdf
