# Supplementary material for: Red-Fleshed Apples Rich in Anthocyanins and White-Fleshed Apples Modulate the Aorta and Heart Proteome in Hypercholesterolaemic Rats: The AppleCOR Study
Source: Nutrients. 2022 Feb 28;14(5):1047. doi: 10.3390/nu14051047 (PMC8912372; doi:10.3390/nu14051047)
Supplement: Supplementary file 1 [file nutrients-14-01047-s001.zip › Supplementary Table S5_BBDD aorta.xlsx]

## Sheet: Sheet1
Accession	Description	Σ# Proteins	Σ# Unique Peptides	Σ# Peptides	Σ# PSMs	HFD+ANTO - M2 G5	HFD - F1 G2	HFD+ANTO - F2 G5	HFD - M1 G2	HFD+WA - M2 G4	STD - F1 G1	HFD+WA - F2 G4	STD - M1 G1	STD - M3 G1	HFD+WA - F1 G4	STD - F3 G1	HFD+WA - M1 G4	HFD+ATOR - M2 G6	HFD+RA - F1 G3	HFD+ATOR - F2 G6	HFD+RA - M1 G3	HFD+RA - M3 G3	HFD+ATOR - F1 G6	HFD+RA - F3 G3	HFD+ATOR - M1 G6	HFD - M3 G2	HFD+ANTO - F1 G5	HFD - F3 G2	HFD+ANTO - M1 G5	HFD+ANTO - M3 G5	HFD - F2 G2	HFD+ANTO - F3 G5	HFD - M2 G2	HFD+WA - M3 G4	STD - F2 G1	HFD+WA - F3 G4	STD - M2 G1	HFD+ATOR - M3 G6	HFD+RA - F2 G3	HFD+ATOR - F3 G6	HFD+RA - M2 G3	SCORE	Coverage	MW [kDa]	calc. pI
P11517	Hemoglobin subunit beta-2 OS=Rattus norvegicus OX=10116 PE=1 SV=2 - [HBB2_RAT]	4	8	23	1110	0.754231	0.740684	0.6567	1.65863	0.381092	0.798547	2.11855	0.889688	1.04505	1.16733	1.2954	2.90192	0.711602	0.545233	0.912024	1.65486	0.779612	0.416924	1.22308	1.08827	1.09191	0.853086	0.725487	0.842029	1.56017	0.62217	1.55826	1.35503	1.05314	0.659551	0.589029	1.30138	0.654275	0.388661	1.46141	0.78857	6016.14	96.6	15.9723	8.79248
P01946	Hemoglobin subunit alpha-1/2 OS=Rattus norvegicus OX=10116 GN=Hba1 PE=1 SV=3 - [HBA_RAT]	2	2	16	874	0.753235	0.912514	0.756499	1.46046	0.525181	0.936764	2.00573	0.911716	1.4776	0.961123	1.49483	4.23928	0.903802	0.519877	0.566672	1.5791	0.782721	0.541073	1.00972	0.911743	1.06244	0.721829	0.699986	0.690401	1.13905	1.01964	1.49092	1.2427	0.891815	0.958917	0.715819	1.72998	0.566085	0.543032	1.88289	0.731187	3414.28	96.48	15.3188	7.97217
A0A0G2JSV6	Globin c2 OS=Rattus norvegicus OX=10116 GN=Hba-a2 PE=1 SV=1 - [A0A0G2JSV6_RAT]	2	2	16	832	0.803601		0.614904		0.478357		1.70443		1.23128		1.16228		0.600481		0.615414		0.575273		1.16918		0.690379		0.563251		0.770103		1.35752		0.742091		0.487976		0.659921		1.62025		3403.33	96.48	15.2748	8.30908
A0A0G2JSW3	Globin a4 OS=Rattus norvegicus OX=10116 GN=Hbb PE=1 SV=1 - [A0A0G2JSW3_RAT]	4	7	21	1250	0.985301	0.712345	0.88934	1.11006	0.71064	0.921538	1.81024	0.904755	1.30496	1.15408	1.09005	3.71476	1.06518	0.591207	0.857019	1.22359	0.560628	0.571814	1.57258	1.03076	0.731301	0.939772	0.808539	0.782209	1.32407	0.834979	1.4414	1.15499	0.812674	0.484088	0.572451	1.62227	0.774671	0.67716	1.12593	0.67958	7258.84	95.24	15.9552	8.07471
Q5XFX0	Transgelin-2 OS=Rattus norvegicus OX=10116 GN=Tagln2 PE=1 SV=1 - [TAGL2_RAT]	1	14	22	242	1.47997	0.826055	1.31596	0.752503	0.612205	1.03177	0.705116	0.869011	1.68822	0.78271	0.983772	1.10895	2.26027	0.915523	0.555692	1.10791	0.63524	0.742867	1.4155	1.20308	0.688569	1.10288	0.849077	1.04516	1.08783	1.12536	1.21103	1.14067	1.42235	0.722239	0.908462	1.74624	1.0498	1.16094	1.26577	0.8006	851.942	90.95	22.3791	8.25049
Q62669	Beta-globin OS=Rattus norvegicus OX=10116 GN=LOC103694855 PE=1 SV=1 - [Q62669_RAT]	1	8	16	477	0.783339	0.853145	0.285316	1.52476	0.396378	0.957066	2.63	0.848671	0.685532	1.05724	1.67972	2.06164	0.407427	0.493156	0.600027	1.5414	1.13309	0.302627	0.966431	1.47547	1.29703	0.990836	0.572856	0.782977	0.669161	0.370905	1.52575	1.31915	1.74997	0.857221	0.719903	1.9204	0.504385	0.429545	1.75111	0.874503	2731.06	87.76	16.0123	8.19189
P05964	Protein S100-A6 OS=Rattus norvegicus OX=10116 GN=S100a6 PE=1 SV=3 - [S10A6_RAT]	1	5	8	93	0.824179	0.937409	3.05766	0.871011	0.793795	0.733222	1.05572	1.09294	1.88519	0.833527	0.881907	1.07791	0.885789	0.884799	0.585077	0.880985	0.720504	0.903691	1.09187	0.958108	0.721323	0.866092	1.24662	0.908774	0.657738	1.39068	1.02774	0.902255	1.0039	0.839142	1.30929	2.07377	0.959243	1.12451	0.824637	1.3824	412.543	83.15	10.0283	5.47803
P08010	Glutathione S-transferase Mu 2 OS=Rattus norvegicus OX=10116 GN=Gstm2 PE=1 SV=2 - [GSTM2_RAT]	7	7	31	344	0.974828	0.974622	1.22427	1.1722	1.42994	1.15938	1.06433	0.989509	0.835898	0.877246	0.894416	1.32075	0.969253	1.12282	1.18929	1.33403	1.22308	0.771146	1.19028	0.805985	1.29702	1.15277	1.0866	0.805684	1.13042	0.862559	0.917938	0.842396	0.708928	0.788296	0.859133	1.57628	1.04481	0.960038	0.881486	1.05966	1212.86	83.49	25.686	7.38623
P80254	D-dopachrome decarboxylase OS=Rattus norvegicus OX=10116 GN=Ddt PE=1 SV=3 - [DOPD_RAT]	1	6	10	67	1.05637	0.694692	1.07638	0.944142	1.05339	1.1667	0.863133	1.10229	1.67149	0.767943	0.922745	1.2368	1.47215	0.971108	0.566681	1.63415	0.997911	0.933211	1.24225	1.22808	0.764984	1.31124	0.590581	0.939512	0.81371	0.854155	0.99207	0.974772	1.1832	0.897285	0.577135	1.37956	0.899836	1.25067	1.19682	0.85047	205.014	86.44	13.1248	6.53662
P62329	Thymosin beta-4 OS=Rattus norvegicus OX=10116 GN=Tmsb4x PE=1 SV=2 - [TYB4_RAT]	1	1	5	29				0.712814				1.41169				1.87475				1.08159				1.17988				1.14505				1.16338				4.56348				0.767329	59.2433	86.36	5.04952	5.05908
P62738	Actin, aortic smooth muscle OS=Rattus norvegicus OX=10116 GN=Acta2 PE=2 SV=1 - [ACTA_RAT]	6	11	36	1877	1.15514	1.1764	1.10649	0.895495	0.794241	1.10108	0.871055	1.04206	0.798338	1.21482	0.967017	0.885046	0.938831	1.13184	1.01962	1.04316	0.901574	1.05894	1.00212	0.906526	0.962581	0.92072	1.23026	1.10367	1.2007	0.914438	0.887374	0.799099	1.16004	0.999286	1.115	1.00023	1.1603	1.13724	0.820938	1.15559	6818.96	84.62	41.9818	5.38916
G3V8C3	Vimentin OS=Rattus norvegicus OX=10116 GN=Vim PE=1 SV=1 - [G3V8C3_RAT]	41	37	64	823	0.789306	0.862553	4.14473	0.501976	0.435805	0.390613	0.844921	1.13069	0.640574	0.567645	0.694925	0.503427	3.79742	0.470163	0.258964	0.24868	0.74831	1.73556	2.69427	2.04854	1.0176	0.207617	0.629733	1.25689	0.273816	1.26594	0.84197	0.778804	2.28944	1.2815	1.2711	0.569316	0.324045	1.14374	0.485839	0.36627	2856.8	83.91	53.6681	5.12256
P31232	Transgelin OS=Rattus norvegicus OX=10116 GN=Tagln PE=1 SV=2 - [TAGL_RAT]	3	20	30	1279	1.44002	0.925184	1.47813	0.88413	0.562683	1.2573	0.838809	1.12333	1.43562	0.741965	0.908922	1.03923	1.52154	1.1159	0.689979	0.920466	0.553686	0.901014	1.46746	0.936883	0.603118	1.1395	0.890941	1.08295	1.06824	1.09357	1.15388	0.97714	1.38045	0.84514	0.689172	1.11744	1.10837	1.0885	0.786303	0.86831	4625.49	82.59	22.5883	8.83643
P02770	Serum albumin OS=Rattus norvegicus OX=10116 GN=Alb PE=1 SV=2 - [ALBU_RAT]	1	3	82	3861	0.755944	0.166696	1.21522	0.115074	0.282689	0.096489	0.100028	0.401644	2.90165	0.89644	0.279534	4.81311	0.526073	0.877623	0.196681	2.79537	1.13214	0.195811	1.05324	1.60048	0.989131	1.50598	0.173768	0.835997	0.28792	6.0168	2.03655	1.69632	0.269008	0.169594	0.484334	0.229151	1.00482	0.180944	2.04788	0.93677	13639.8	82.07	68.6861	6.48096
A0A0G2JSH5	Serum albumin OS=Rattus norvegicus OX=10116 GN=Alb PE=1 SV=1 - [A0A0G2JSH5_RAT]	1	3	83	3991	0.841734	0.898333	0.987631	1.23015	0.619949	1.63697	1.48498	0.877486	1.71498	0.51355	1.33663	0.177934	3.08285	0.747162	0.389089	0.127915	0.457299	1.27396	0.849939	1.0605	0.645358	1.01194	0.253325	0.609233	0.944177	0.0701869	1.04848	0.891817	2.11325	1.28398	0.279783	2.47424	0.745541	2.39641	0.977087	0.536979	14400.7	82.07	68.7141	6.48096
Q08290	Calponin-1 OS=Rattus norvegicus OX=10116 GN=Cnn1 PE=1 SV=1 - [CNN1_RAT]	1	15	29	413	0.928881	1.09286	1.68521	0.950639	0.696996	1.06616	1.03376	1.08056	1.33861	0.678232	1.07798	1.24304	1.44016	0.913708	0.550251	0.497917	0.779034	0.953193	1.45887	1.12722	0.756526	0.533121	0.928716	1.1925	0.896955	1.45316	1.1639	1.27345	1.24107	1.01035	1.18184	1.06557	0.802515	0.925921	0.991438	0.974181	1191.93	77.44	33.3226	8.82178
P36972	Adenine phosphoribosyltransferase OS=Rattus norvegicus OX=10116 GN=Aprt PE=1 SV=1 - [APT_RAT]	1	6	11	77	1.81638	0.966315	0.865012	1.01086	1.2781	0.971579	0.990754	0.913688	0.924995	1.04546	0.981023	1.18203	1.43275	1.20347	1.04592	1.4933	0.932683	0.99903	1.18213	0.871414	1.73868	1.3543	0.8547	1.05706	1.23978	1.05254	0.97663	0.912166	0.733921	1.01377	0.856284	1.16333	0.895344	1.0094	1.05512	1.13845	266.418	72.22	19.5334	6.56592
Q7M0E3	Destrin OS=Rattus norvegicus OX=10116 GN=Dstn PE=1 SV=3 - [DEST_RAT]	2	7	17	184	0.9204	0.955266	0.885946	1.05073	1.0885	1.11785	1.06267	1.0262	1.12866	0.769694	1.13297	1.07728	0.86355	1.15328	0.848464	1.21993	0.903441	1.01941	1.12991	0.9476	0.921042	1.00713	0.998087	1.05694	0.999764	0.929793	1.18319	1.08876	0.888126	0.980959	1.12053	1.12907	1.10073	0.819405	1.01997	1.07275	545.981	76.97	18.5215	8.03076
P63102	14-3-3 protein zeta/delta OS=Rattus norvegicus OX=10116 GN=Ywhaz PE=1 SV=1 - [1433Z_RAT]	2	10	24	227	0.917956	1.06579	1.21123	0.964969	1.14928	1.14225	0.916816	0.961719	1.03079	0.968062	1.10354	0.869888	0.897902	1.12083	0.902065	0.968266	1.02172	1.0308	1.0204	0.823892	0.993867	0.909792	1.11979	0.989761	0.899705	1.00737	0.946469	0.948248	0.906247	1.17608	1.11866	1.06976	1.01511	0.881028	1.01561	1.09401	940.952	79.18	27.7537	4.79248
P10111	Peptidyl-prolyl cis-trans isomerase A OS=Rattus norvegicus OX=10116 GN=Ppia PE=1 SV=2 - [PPIA_RAT]	4	12	13	348	1.33986	0.769757	1.05162	0.848874	1.19067	1.07344	0.879097	1.10961	1.32733	0.797214	0.974632	1.10004	1.50099	0.931471	0.766797	1.02212	0.827059	0.893215	1.50941	1.05272	0.848786	1.10922	0.74258	1.07327	1.16448	1.06463	1.05351	1.02053	1.16188	0.853653	0.790291	1.37137	0.88522	0.976258	0.949933	0.914164	881.615	78.66	17.8628	8.1626
Q9QZ76	Myoglobin OS=Rattus norvegicus OX=10116 GN=Mb PE=1 SV=3 - [MYG_RAT]	1	6	12	93	0.714471	0.995258	0.820352	1.2349	1.09786	1.18018	1.33512	0.968059	1.3812	1.6626	1.40463	2.79482	1.00817	0.707192	0.74	2.15307	0.723782	0.57881	0.29729	0.555065	0.84372	1.76625	0.758547	0.741766	1.6894	1.00894	1.19627	1.20719	1.01652	0.758764	0.539407	0.940066	1.39729	0.905845	1.95368	0.908417	534.63	74.68	17.146	8.104
P62963	Profilin-1 OS=Rattus norvegicus OX=10116 GN=Pfn1 PE=1 SV=2 - [PROF1_RAT]	1	10	12	212	1.0813	0.925022	0.759392	1.13586	1.15972	1.15588	0.879723	0.873928	0.982985	1.01909	0.997166	0.955895	0.960947	1.26792	1.13061	1.46333	0.955913	1.04929	0.902672	0.796952	0.940093	1.30077	1.19457	1.13803	0.985842	0.919839	0.927736	0.937478	0.719186	0.92662	1.1079	1.0558	1.36884	0.839521	0.970206	1.19191	928.15	78.57	14.9475	8.27979
P07150	Annexin A1 OS=Rattus norvegicus OX=10116 GN=Anxa1 PE=1 SV=2 - [ANXA1_RAT]	1	20	34	293	0.737253	0.936165	1.15287	1.07019	1.21405	1.10865	0.960771	0.97997	1.09246	0.897368	1.08868	0.968432	0.80889	1.14011	0.947927	1.12124	0.936393	0.945234	0.920116	0.761269	0.924646	1.15625	1.11562	1.02653	0.988199	1.04201	0.93203	0.975682	0.77578	0.957208	1.06929	1.19224	1.13143	0.999887	0.872837	1.12127	1063.23	75.43	38.8049	7.34229
P70623	Fatty acid-binding protein, adipocyte OS=Rattus norvegicus OX=10116 GN=Fabp4 PE=1 SV=3 - [FABP4_RAT]	5	11	13	138	0.579786	1.14357	0.533693	0.66289	0.775541	1.04865	2.19969	0.755008	1.40026	1.09864	1.3715	1.12184	0.491216	1.00567	0.986033	2.58991	0.990465	0.789635	0.289589	0.716846	0.661513	1.95003	1.14473	0.66533	1.11794	1.22836	1.68758	1.33099	1.07652	1.54231	0.540637	0.531875	1.17457	1.04782	1.21612	1.12754	413.889	76.52	14.6986	7.94287
P45592	Cofilin-1 OS=Rattus norvegicus OX=10116 GN=Cfl1 PE=1 SV=3 - [COF1_RAT]	2	3	12	104	0.672941	0.979435	0.871593	1.17228	1.13358	1.05519	1.12278	1.02215	1.44068	0.809319	1.31839	0.889444	0.844786	0.948233	0.820289	1.16793	0.972538	0.984104	1.11625	1.09895	0.797926	0.842925	0.869272	1.06109	1.04225	0.940062	1.34789	1.29424	1.28156	1.17511	1.10595	0.909392	0.901895	0.670078	1.40936	1.14896	426.715	68.67	18.5207	8.08936
P26772	10 kDa heat shock protein, mitochondrial OS=Rattus norvegicus OX=10116 GN=Hspe1 PE=1 SV=3 - [CH10_RAT]	2	6	13	170	1.1438	0.805487	1.87217	0.89885	1.00971	0.997484	0.931324	1.37227	1.69999	0.517537	0.829467	1.40415	1.05457	0.768658	0.415651	0.702322	0.91485	0.803058	1.66986	1.31152	0.89318	1.13131	0.475844	1.0672	0.864631	1.127	1.06646	1.08684	1.39619	0.916725	0.672988	1.73452	0.714662	1.37394	1.14692	0.778662	448.817	76.47	10.8949	8.92432
P47875	Cysteine and glycine-rich protein 1 OS=Rattus norvegicus OX=10116 GN=Csrp1 PE=1 SV=2 - [CSRP1_RAT]	1	8	15	202	1.14861	1.02568	1.44532	0.949684	0.881229	0.934925	0.843314	0.9477	1.02468	0.903982	0.948932	0.870429	1.29258	1.05043	0.818357	0.461934	0.970559	1.21072	1.03499	1.02532	1.02364	0.501245	1.21778	1.05213	0.817161	1.12761	0.953985	1.00406	0.994976	1.05886	1.19454	0.806556	1.00371	1.06861	0.813146	1.07732	1260.56	73.06	20.5998	8.57275
P48500	Triosephosphate isomerase OS=Rattus norvegicus OX=10116 GN=Tpi1 PE=1 SV=2 - [TPIS_RAT]	3	10	17	126	1.00481	0.828025	0.77495	1.03524	0.795533	1.14645	1.34161	1.18581	1.24418	0.89435	0.905661	1.09242	0.963567	0.906864	0.923231	1.0834	0.804115	1.06108	0.823092	0.998341	0.644018	1.0888	0.785185	0.96688	0.885079	0.952697	1.37519	1.13605	1.20364	1.10668	0.73169	0.741859	1.01869	0.980012	1.0235	0.766909	458.433	74.3	26.8318	7.23975
P85972	Vinculin OS=Rattus norvegicus OX=10116 GN=Vcl PE=1 SV=1 - [VINC_RAT]	3	66	96	1416	1.01195	1.10671	1.23817	0.98841	1.05572	1.05928	0.957068	0.914546	0.867051	1.12396	1.12484	0.885365	1.08086	0.946288	0.852041	0.419311	1.08862	1.16669	1.10977	0.955746	1.22387	0.494753	1.23625	1.11113	0.870382	1.06351	0.918787	0.998537	0.932729	1.14136	1.3167	0.854877	0.945254	1.05887	0.969026	1.08106	5998.43	71.29	116.542	6.0874
Q63610	Tropomyosin alpha-3 chain OS=Rattus norvegicus OX=10116 GN=Tpm3 PE=1 SV=2 - [TPM3_RAT]	1	4	27	252	0.986771	0.823704	2.26715	0.885746	0.511606	0.771032	0.808382	0.937622	2.47554	0.668608	0.966602	1.58439	2.80882	0.861152	0.377126	0.626479	0.515362	1.0694	1.82313	1.18653	0.62617	0.712154	0.537965	1.01038	0.72222	1.42797	1.52172	1.13687	2.14422	0.928397	0.626139	1.41501	0.794849	1.64968	1.09503	0.763036	592.906	63.71	28.9887	4.77979
Q9WUH4	Four and a half LIM domains protein 1 OS=Rattus norvegicus OX=10116 GN=Fhl1 PE=2 SV=1 - [FHL1_RAT]	5	15	27	279	0.834724	1.6088	0.930721	1.00625	1.24919	1.01265	0.887638	0.859381	0.772773	1.14505	1.11935	0.698166	0.997099	1.14934	0.743174	0.312073	1.27141	1.36357	0.76653	0.862113	1.6269	0.426827	1.45608	0.904685	1.00378	1.38407	0.878182	1.08266	0.769124	1.38794	1.45994	0.523984	0.847871	1.16534	0.784432	1.0851	913.604	72.14	31.8819	8.36768
Q6P725	Desmin OS=Rattus norvegicus OX=10116 GN=Des PE=1 SV=1 - [Q6P725_RAT]	9	22	44	324	0.811933	0.734335	4.43739	0.524769	0.380939	0.437796	0.919683	1.06365	0.3219	0.434858	0.506751	0.464819	3.85296	0.50602	0.246162	0.285169	1.15329	2.82545	2.06899	2.08523	1.2463	0.29895	0.633202	1.39144	0.311092	0.89389	0.704853	0.633235	2.13994	1.3603	1.25334	0.629601	0.311412	0.87419	0.374043	0.390394	1173.03	69.94	53.3901	5.2749
Q923Z2	Tropomyosin 1, alpha, isoform CRA_a OS=Rattus norvegicus OX=10116 GN=Tpm1 PE=1 SV=1 - [Q923Z2_RAT]	1	6	38	441	0.827998	0.88519	2.92794	0.781964	0.822883	1.02584	0.732735	1.52715	1.68914	0.541103	0.902498	1.47831	2.03431	0.869429	0.37557	0.397381	0.719607	1.12475	1.70162	1.26425	0.927026	0.606529	0.445816	0.918401	0.680606	1.15653	1.05947	0.931108	1.56693	1.00811	0.928201	1.8451	0.745411	1.69411	0.99984	0.834756	1092.12	63.38	32.7727	4.75439
P05065	Fructose-bisphosphate aldolase A OS=Rattus norvegicus OX=10116 GN=Aldoa PE=1 SV=2 - [ALDOA_RAT]	4	16	29	308	1.11808	0.93811	0.781366	1.05122	1.01038	1.05596	1.31744	1.04803	1.06554	1.02957	0.908675	1.15915	0.911477	1.03383	1.06505	1.04213	0.913317	1.03133	0.796398	0.81832	0.8199	1.09695	0.944839	0.909816	1.10959	0.949656	1.21565	1.01757	0.968496	0.98807	0.818922	0.905945	1.18177	0.983059	0.972902	0.995086	898.702	62.91	39.3273	8.08936
P11030	Acyl-CoA-binding protein OS=Rattus norvegicus OX=10116 GN=Dbi PE=1 SV=3 - [ACBP_RAT]	2	3	7	76	0.922727	0.698235	2.19188	0.712444	0.573508	1.00395	1.22896	1.30871	2.2412	0.681115	1.12271	1.65482	1.78996	0.795417	0.559903	0.993658	0.504457	0.843829	1.27435	1.19292	0.425955	1.49281	0.586458	0.884739	0.62538	1.35238	1.56533	1.2789	1.45175	0.801591	0.609036	1.40014	0.834238	1.86808	1.08704	0.870062	207.985	59.77	10.0212	8.82178
A0A0G2JVG3	Pyruvate kinase OS=Rattus norvegicus OX=10116 GN=Pkm PE=1 SV=1 - [A0A0G2JVG3_RAT]	2	3	30	165	0.791432	1.10039	0.773301	0.348208	1.12112	0.842955	1.36882	1.59517	0.968038	1.28551	1.125	0.903277	0.885881	0.895898	1.26053	3.45499	0.989443	1.17957	0.771498	0.65922	0.921219	0.871555	1.25236	1.83409	0.850468	0.980385	0.998366	0.955293	0.960846	1.32617	1.16466	2.33959	1.09593	1.04152	0.923253	0.884621	802.175	68.3	53.1595	7.82568
P61983	14-3-3 protein gamma OS=Rattus norvegicus OX=10116 GN=Ywhag PE=1 SV=2 - [1433G_RAT]	3	9	18	182	0.53814	1.14036	1.07182	0.992165	1.23461	1.04066	1.01025	1.00898	1.15774	1.20187	1.17194	0.942313	0.605543	0.988537	0.936941	1.22945	1.14456	1.1388	0.814248	0.770389	0.959714	0.94867	1.18086	0.901525	0.954456	1.13414	1.07806	1.01113	1.21467	1.35025	1.10555	0.961119	0.974844	0.877094	1.1649	1.17137	509.454	70.85	28.2849	4.89404
P11980	Pyruvate kinase PKM OS=Rattus norvegicus OX=10116 GN=Pkm PE=1 SV=3 - [KPYM_RAT]	3	3	35	189	1.35476	0.910055	0.942377	0.981011	1.12095	1.1025	1.38551	0.980805	1.20634	1.27611	1.0584	1.02671	1.41821	1.05578	1.27525	1.28976	0.770144	0.97094	0.741165	0.845152	0.815601	1.19026	1.16274	1.01971	1.3524	0.868162	0.971065	0.912885	1.37941	0.796969	0.9896	0.883332	1.28889	1.03491	0.877551	0.988456	769.606	63.47	57.7809	7.06396
M0R5J4	Uncharacterized protein OS=Rattus norvegicus OX=10116 PE=3 SV=1 - [M0R5J4_RAT]	3	11	24	267	0.877902	1.00489	0.595752	0.962152	1.05867	1.06404	1.36436	0.827228	1.2769	1.00245	1.02829	0.990796	0.983675	1.10034	0.966732	1.20428	0.96928	0.872766	0.734793	0.837362	0.8466	1.34009	1.00976	0.875198	0.964485	0.917109	1.09967	0.980634	1.05569	1.16386	0.879132	0.665193	1.1059	0.84804	1.04338	1.05958	1164.5	64.29	47.0452	6.3667
B5DFD8	SH3 domain-binding glutamic acid-rich-like protein OS=Rattus norvegicus OX=10116 GN=Sh3bgrl PE=1 SV=1 - [B5DFD8_RAT]	1	3	4	19	1.19009		1.56212	0.879164	0.384682		0.767095	0.944851	1.79191		0.940974	1.42263	1.6252		0.559334	1.0356	0.292913		2.06275	1.12607	0.691182		0.621065	1.14508	0.712149		1.26483	1.07844	1.12737		0.687015	1.54449	0.832089		1.0212	0.783726	107.03	60.53	12.7923	5.07178
P39069	Adenylate kinase isoenzyme 1 OS=Rattus norvegicus OX=10116 GN=Ak1 PE=1 SV=3 - [KAD1_RAT]	3	6	13	90	1.05311	0.866265	1.2199	0.993679	0.760141	0.99505	1.29958	1.45593	1.47709	0.761989	1.14278	1.393	1.07877	0.901705	0.69356	0.910213	0.60616	0.908529	1.54634	1.10308	0.619822	1.07206	0.664677	0.898904	0.700853	1.06699	1.41231	1.209	1.3711	0.981357	0.847116	1.0723	0.971686	1.1263	1.25436	0.922457	337.427	67.01	21.5702	7.89893
A0A0G2JSQ4	Tropomyosin 1, alpha, isoform CRA_p OS=Rattus norvegicus OX=10116 GN=Tpm1 PE=1 SV=1 - [A0A0G2JSQ4_RAT]	1	6	32	398	0.9122	0.99147	2.74726	0.909137	0.687335	1.06867	0.646058	1.54321	1.80954	0.552012	0.943262	1.50161	1.35773	0.79766	0.310189	0.473569	0.628406	1.05938	1.44555	1.30548	0.692571	0.532201	0.421368	0.78463	0.567888	1.23281	1.11257	1.02915	1.54877	1.09897	0.962604	1.8344	0.655771	1.41465	1.11754	0.880242	1110.22	66.13	28.5395	4.76709
A0A0G2JSZ2	RCG32102, isoform CRA_a OS=Rattus norvegicus OX=10116 GN=Svs4 PE=4 SV=1 - [A0A0G2JSZ2_RAT]	2	7	8	181	0.513693	0.121139	0.602086	0.316143	2.99667	0.512258	12.5999	2.56894	0.452954	0.0942396	0.478461	0.356556	1.05071	0.0467804	0.830614	1.10953	0.350905	0.0482755	0.518307	0.42671	1.45666	0.300237	1.95514	1.28375	3.42236	0.0500151	0.453131	3.33435	0.588854	0.0340971	0.543019	0.622616	0.21987	0.227121	0.425858	0.308637	2163.26	68.47	11.924	9.0415
G3V6D3	ATP synthase subunit beta OS=Rattus norvegicus OX=10116 GN=Atp5f1b PE=1 SV=1 - [G3V6D3_RAT]	2	19	25	434	1.26952	0.938413	0.740998	1.05143	1.21164	1.12997	0.876235	0.986128	0.973457	1.01815	0.866796	0.888539	0.863445	1.15305	1.08676	1.32722	0.930653	1.02035	1.10307	0.88258	0.998028	1.27648	0.987069	1.05676	1.15213	0.792366	1.01014	0.932716	1.19682	0.91676	0.943918	0.892283	1.21121	0.909279	1.03808	0.998972	2131.04	64.84	56.3095	5.2749
P04636	Malate dehydrogenase, mitochondrial OS=Rattus norvegicus OX=10116 GN=Mdh2 PE=1 SV=2 - [MDHM_RAT]	1	18	23	250	0.928275	1.06417	0.740125	0.995056	1.17878	0.996833	1.10692	0.947198	0.924997	0.932225	0.857313	0.958064	0.719118	1.17818	1.13671	1.32294	1.26079	0.892068	0.646857	0.839872	1.0091	1.63937	1.17303	0.939606	1.16692	0.837734	0.91029	0.833478	0.804602	0.998583	0.948063	0.812279	1.23575	0.925396	0.988853	1.03586	1200.2	67.46	35.6608	8.67529
P11762	Galectin-1 OS=Rattus norvegicus OX=10116 GN=Lgals1 PE=1 SV=2 - [LEG1_RAT]	1	9	10	115	1.15743	0.901972	1.98509	0.819988	1.03357	0.917569	0.974844	1.40973	1.02497	0.692074	0.912703	1.14271	1.51356	0.852655	0.5695	0.919314	0.954541	1.17961	1.22923	1.21616	1.0726	0.954039	0.64472	0.998899	1.11538	1.23781	1.14583	1.09158	1.34935	0.998875	0.998976	1.46034	0.747477	1.33694	0.984145	0.806277	278.53	67.41	14.8472	5.26221
Q99MC0	Protein phosphatase 1 regulatory subunit 14A OS=Rattus norvegicus OX=10116 GN=Ppp1r14a PE=1 SV=1 - [PP14A_RAT]	1	3	7	59	1.26999	1.00984	1.62371	1.02119	0.952876	1.0552	1.0132	1.20479	1.17744	0.745512	1.14108	1.18202	1.41336	1.03238	0.849175	0.935619	0.764825	0.947978	1.37898	1.07019	0.862269	0.950665	0.775585	0.959513	0.659555	1.00234	1.1019	1.02784	0.834379	0.934882	1.08262	1.06821	0.893396	0.961678	1.01827	0.99684	226.853	67.35	16.6867	8.01611
G3V913	Heat shock 27kDa protein 1 OS=Rattus norvegicus OX=10116 GN=Hspb1 PE=1 SV=1 - [G3V913_RAT]	2	8	14	201	1.33466	0.835312	2.18926	0.85784	0.755431	0.99894	0.637829	1.31191	1.64803	0.643469	0.857662	0.939017	2.48878	1.05203	0.44998	0.737872	0.778621	1.03501	1.764	1.10138	0.740796	0.913815	0.475227	0.931277	0.728202	1.12887	0.966136	0.990596	1.29616	0.901697	0.729669	1.96709	0.812301	1.32554	0.770163	0.867992	1102.1	59.22	22.7935	6.21436
Q63607	Alpha-tropomyosin 3 OS=Rattus norvegicus OX=10116 GN=Tpm1 PE=1 SV=1 - [Q63607_RAT]	1	1	34	426	0.899252				0.726418				1.55724				1.75572				0.585304				0.904563				0.987154				1.6518				0.832154				1112.66	58.45	32.8277	4.77979
A0A0G2K6J5	Myosin light polypeptide 6 OS=Rattus norvegicus OX=10116 GN=Myl6 PE=1 SV=1 - [A0A0G2K6J5_RAT]	6	6	10	246	1.26381	0.777037	1.62231	0.896863	0.761083	1.334	0.568777	1.45304	1.40049	0.885807	0.740932	1.30452	1.45211	1.12176	0.831409	1.37586	0.52045	0.852341	1.30108	0.872475	0.587876	1.71914	0.532544	0.665823	1.02657	0.842654	1.16589	0.747781	1.60898	0.745859	0.628462	1.72747	0.897057	1.26415	1.00216	1.05111	1111.04	66.89	16.9501	4.55127
P07943	Aldose reductase OS=Rattus norvegicus OX=10116 GN=Akr1b1 PE=1 SV=3 - [ALDR_RAT]	1	9	18	219	1.23487	1.04626	0.871187	0.795942	1.40161	1.10418	1.02934	0.832901	0.970669	0.921079	1.33994	0.900367	0.97428	1.40325	0.998305	1.15326	1.04858	0.828815	0.941421	0.746743	0.933578	1.45485	1.07247	0.9877	1.26153	1.02822	0.948443	1.12182	0.768347	0.683907	0.888147	1.44119	0.864983	1.10916	1.26758	1.10409	995.51	61.39	35.7743	6.7124
Q07936	Annexin A2 OS=Rattus norvegicus OX=10116 GN=Anxa2 PE=1 SV=2 - [ANXA2_RAT]	1	16	25	317	0.769999	0.998513	1.02003	1.07711	1.13262	0.965224	0.978437	0.962481	1.09043	0.980845	1.04851	1.00838	0.803399	1.13472	1.08337	1.16986	0.912263	0.933144	0.820665	0.798397	1.00298	1.07084	1.20956	0.89394	1.01278	0.986395	0.940523	0.905779	0.858391	1.00467	1.08578	1.01554	1.13963	0.950438	0.891635	1.03305	1214.57	65.78	38.6538	7.69385
P09527	Ras-related protein Rab-7a OS=Rattus norvegicus OX=10116 GN=Rab7a PE=1 SV=2 - [RAB7A_RAT]	2	6	10	46	0.850535	1.04966	0.999503	1.11097	1.16283	1.07662	0.944934	0.850347	1.01164	1.08817	0.94284	0.999166	0.88799	1.15106	1.06916	1.41782	1.00902	0.940501	0.874159	0.789721	1.21202	1.28974	1.12076	0.953728	1.05902	0.862705	0.94648	0.921962	0.751827	1.04174	1.08042	0.800493	1.24082	0.859532	1.02387	1.1942	250.607	57.49	23.4889	6.69775
P04276	Vitamin D-binding protein OS=Rattus norvegicus OX=10116 GN=Gc PE=1 SV=3 - [VTDB_RAT]	2	18	28	232	1.12573	0.55879	1.59102	0.890923	0.306988	0.791215	1.02308	1.18837	1.51992	0.500522	1.25781	1.59097	1.74562	0.652814	0.599758	1.1641	0.502741	0.716171	1.41138	1.42376	0.587592	1.06468	0.506165	0.822832	0.687358	1.5292	1.65818	1.22023	0.92445	0.685653	0.443739	1.88115	0.774427	1.24635	1.37457	0.715114	627.478	59.87	53.509	5.85889
D3ZD09	Cytochrome c oxidase subunit OS=Rattus norvegicus OX=10116 GN=Cox6b1 PE=1 SV=1 - [D3ZD09_RAT]	2	3	7	35	1.22979	0.964619	1.47127	0.747401	0.668866	0.82005	1.11905	1.37396	1.92965	0.521285	0.959055	1.76143	1.95308	0.730083	0.497422	0.940769	1.13455	0.80845	1.2316	1.25784	0.62014	1.48398	0.585809	0.963372	0.790195	1.18476	0.932161	1.07311	1.52841	0.924532	0.704882	1.99979	0.744832	1.62827	1.17493	0.872768	99.95	62.79	10.0649	8.71924
P29419	ATP synthase subunit e, mitochondrial OS=Rattus norvegicus OX=10116 GN=Atp5me PE=1 SV=3 - [ATP5I_RAT]	1	4	6	19		1.00808	1.51587	1.01205		1.1472	0.868417	1.05017		1.04625	0.833013	1.53147		1.25694	0.968364	1.04469		1.03814	1.35632	0.854527		1.30164	0.850384	0.585239		1.13217	0.787637	0.990423		1.10617	0.985828	1.14495		1.07187	0.956689	1.19021	138.97	54.93	8.24948	9.34912
O88767	Protein/nucleic acid deglycase DJ-1 OS=Rattus norvegicus OX=10116 GN=Park7 PE=1 SV=1 - [PARK7_RAT]	2	8	11	82	1.0229	0.638093	1.00158	0.98308	0.802301	0.954393	1.10148	1.17517	1.73753	0.87487	1.03575	1.17048	1.1607	0.895774	0.695862	1.35798	0.701185	0.890109	1.26559	1.18278	0.552079	1.73825	0.640453	1.08712	0.790987	0.827995	1.2716	1.24223	1.31777	0.933969	0.756008	1.11259	0.932767	0.799522	1.17233	0.859693	452.7	61.9	19.9614	6.771
A0A0G2K4U2	Glutathione S-transferase, mu 7 OS=Rattus norvegicus OX=10116 GN=Gstm7 PE=1 SV=1 - [A0A0G2K4U2_RAT]	7	2	19	187	0.716911	0.864992	1.01034	1.29516	1.89866	1.10667	0.946509	1.14695	0.744134	0.695945	0.877981	0.822629	0.368963	1.09964	1.21847	1.14997	1.68195	0.655817	1.14034	0.670885	1.58579	1.08733	0.876517	0.728543	0.882492	0.612585	0.563943	0.689057	0.431772	0.607731	0.722198	1.38317	1.21837	1.05538	0.858901	1.24363	622.87	66.06	25.645	7.32764
Q5XI73	Rho GDP-dissociation inhibitor 1 OS=Rattus norvegicus OX=10116 GN=Arhgdia PE=1 SV=1 - [GDIR1_RAT]	1	4	9	89	0.951453	0.82075	0.760944	1.07443	1.15485	1.13103	1.09589	0.899611	1.10977	0.929658	1.25072	1.00257	0.87719	1.15935	1.13755	1.33019	0.783624	0.933741	1.07488	0.840905	0.807312	1.29754	1.05198	0.910047	1.02039	0.914127	0.991619	0.977365	0.869227	0.953689	0.95868	1.15537	1.28565	0.86671	1.10425	1.09719	403.433	58.33	23.3928	5.19873
P68370	Tubulin alpha-1A chain OS=Rattus norvegicus OX=10116 GN=Tuba1a PE=1 SV=1 - [TBA1A_RAT]	3	2	24	244		1.49538	0.888203	0.801509		1.17974	1.11197	1.17758		1.18558	0.983588	0.944189		1.23875	1.06931	1.28537		1.36105	0.810009	0.86972		1.15305	1.05042	1.06953		1.16395	1.13008	0.939148		1.14033	1.4144	1.47298		0.629916	0.886829	0.986514	944.865	61.64	50.1036	5.05908
P02651	Apolipoprotein A-IV OS=Rattus norvegicus OX=10116 GN=Apoa4 PE=1 SV=2 - [APOA4_RAT]	2	14	26	180	1.09353	0.722276	1.43108	0.684979	0.2038	1.08151	0.546	1.13034	2.09901	0.389468	1.10792	1.12767	1.91688	0.787071	0.420531	0.923171	0.547223	1.06088	1.19888	1.69142	0.728972	1.25656	0.417688	0.703485	0.823342	2.24938	1.42438	1.2135	0.725645	0.868786	0.241525	1.73773	0.802604	1.6605	1.3729	0.645704	792.546	58.82	44.4287	5.22412
P07632	Superoxide dismutase [Cu-Zn] OS=Rattus norvegicus OX=10116 GN=Sod1 PE=1 SV=2 - [SODC_RAT]	1	5	11	105	1.27153	0.762786	1.52575	0.997965	0.635441	0.987109	1.02658	1.18725	1.48629	0.656121	0.909893	1.53464	1.55416	0.956727	0.509044	1.14092	0.657841	0.891509	1.48386	1.23223	0.659373	1.20875	0.477632	0.954792	0.899821	1.19808	1.141	1.07914	1.311	0.904185	0.638381	1.60279	0.92147	1.2912	1.06395	0.977958	500.923	64.94	15.9018	6.354
P04639	Apolipoprotein A-I OS=Rattus norvegicus OX=10116 GN=Apoa1 PE=1 SV=2 - [APOA1_RAT]	1	15	21	199	1.42041	0.865295	0.965157	0.868613	0.198322	1.12888	0.666511	0.997176	2.4297	0.516717	1.10216	1.13091	1.03656	0.929328	0.580575	1.01418	0.518217	1.13027	1.17638	1.3484	0.715916	1.19818	0.586462	0.722886	1.02971	1.70546	1.56552	1.28915	0.828027	0.60636	0.340468	1.84501	1.24513	1.33355	1.23928	0.72977	570.522	64.86	30.0432	5.74463
G3V9V9	Cysteine and glycine-rich protein 2 OS=Rattus norvegicus OX=10116 GN=Csrp2 PE=1 SV=1 - [G3V9V9_RAT]	3	8	12	121	1.33553	1.46426	1.18821	0.698259	0.657602	1.02076	0.833814	0.656867	1.57234	1.46677	1.01794	0.774101	1.71016	0.952889	0.546418	0.265484	0.943407	1.24468	1.04848	1.02784	0.849418	0.4043	1.04031	0.981559	0.939553	1.7949	0.947653	0.986972	1.52319	1.41645	1.05729	0.768424	0.885733	1.22286	0.997035	0.824218	604.309	62.18	20.9118	8.6167
P35213	14-3-3 protein beta/alpha OS=Rattus norvegicus OX=10116 GN=Ywhab PE=1 SV=3 - [1433B_RAT]	3	1	14	126		0.939975	1.37557	1.18325		1.07221	1.27617	1.06177		1.00011	1.01927	1.04986		1.09036	1.01362	1.25919		1.03674	1.08957	0.858082		1.14638	1.43976	1.12618		0.995267	1.01991	0.903068		1.10214	1.27288	1.44449		1.09475	0.907994	1.2664	277.557	52.03	28.0368	4.88135
P14668	Annexin A5 OS=Rattus norvegicus OX=10116 GN=Anxa5 PE=1 SV=3 - [ANXA5_RAT]	2	11	29	271	0.745998	1.0122	0.956266	1.05635	1.37489	1.02778	1.0313	0.882776	1.01619	0.926319	1.05714	1.04662	0.768034	1.10144	0.923912	1.50238	0.911121	0.774924	0.835771	0.763349	0.895917	1.49615	1.12846	1.02481	1.23771	0.959526	0.877357	0.906255	0.791365	0.897297	1.03347	1.3864	1.20913	0.864438	1.05002	1.03453	890.261	64.26	35.7223	5.04639
P11240	Cytochrome c oxidase subunit 5A, mitochondrial OS=Rattus norvegicus OX=10116 GN=Cox5a PE=1 SV=1 - [COX5A_RAT]	1	3	8	93	1.09807	0.727092	1.87296	0.703223	0.494449	0.812988	1.00664	1.53379	1.5078	0.52749	0.739328	1.43184	1.88989	0.707402	0.553446	0.786704	0.708204	0.836815	1.67112	1.33884	0.622024	1.46673	0.479366	1.03974	0.692451	0.979117	0.977841	0.9593	1.70268	0.846718	0.585948	1.85725	0.705104	1.73304	1.01564	0.676338	282.163	58.9	16.1193	6.53662
P04904	Glutathione S-transferase alpha-3 OS=Rattus norvegicus OX=10116 GN=Gsta3 PE=1 SV=3 - [GSTA3_RAT]	5	4	12	80	1.32762	0.92963	1.0652	1.36683	1.26798	1.01	1.12004	1.00424	1.1264	0.978116	0.927431	0.942509	1.42081	1.06143	1.41258	1.98753	1.22239	0.729235	1.03331	0.882928	1.01472	1.13706	1.15838	0.912764	1.01703	0.970779	1.07056	0.894431	0.739884	0.933265	1.00777	1.45829	0.859745	0.969827	1.10222	1.00315	285.96	57.01	25.3033	8.74854
P62804	Histone H4 OS=Rattus norvegicus OX=10116 GN=Hist1h4b PE=1 SV=2 - [H4_RAT]	1	7	12	153	0.695181	1.26423	1.47687	0.794734	0.613085	0.823713	0.983988	1.01169	0.751052	1.42088	1.0365	0.690465	0.837258	0.731452	0.831444	0.449196	0.998209	1.18741	0.829231	1.07394	1.55681	0.562733	1.20516	1.22827	0.434235	0.991246	0.905593	0.898254	1.30803	1.27911	2.37106	0.672981	0.586966	1.19572	0.546871	0.72536	438.576	64.08	11.3604	11.356
A0A0G2JSP8	Creatine kinase M-type OS=Rattus norvegicus OX=10116 GN=Ckm PE=1 SV=1 - [A0A0G2JSP8_RAT]	2	9	22	120	0.696002	0.708667	1.11794	1.34864	0.574893	1.18104	1.97947	1.79952	0.925815	0.822571	0.857931	1.80451	0.608281	0.840292	1.00737	1.70075	0.431515	0.900506	0.448448	0.81953	0.443419	0.866425	0.706417	1.06674	1.1557	0.941848	2.01725	1.34358	0.707618	0.700285	0.559584	0.824071	0.984567	0.750129	1.54388	0.706825	551.477	56.43	42.9918	7.06396
O35077	Glycerol-3-phosphate dehydrogenase [NAD(+)], cytoplasmic OS=Rattus norvegicus OX=10116 GN=Gpd1 PE=1 SV=4 - [GPDA_RAT]	1	11	18	130	1.01099	1.00789	0.624122	0.607881	0.754473	1.02722	2.39247	0.854466	1.52691	1.38861	1.26532	1.20351	1.07875	0.789532	0.970827	1.27906	0.943671	0.857646	0.499489	0.875929	0.679593	1.7738	0.843188	0.769056	1.24136	1.1115	1.49028	1.08072	1.24333	1.51828	0.564236	0.661012	1.17878	1.04977	1.0481	0.755834	422.19	58.74	37.4282	6.59521
A0A0G2K3Z9	Uncharacterized protein OS=Rattus norvegicus OX=10116 PE=4 SV=1 - [A0A0G2K3Z9_RAT]	2	5	14	157	0.919087	0.982116	0.853047	1.00055	1.04561	1.06907	1.16196	1.07528	1.27412	0.823583	1.08161	1.12365	0.903556	0.923377	0.783689	0.887617	0.923237	0.929166	1.06276	1.10635	0.963625	0.873468	0.848485	0.983041	0.888833	0.951489	1.1474	1.08899	1.13743	0.982808	1.0259	0.932647	0.864659	0.970833	1.13332	0.910209	542.516	63.32	22.1504	8.39697
P63039	60 kDa heat shock protein, mitochondrial OS=Rattus norvegicus OX=10116 GN=Hspd1 PE=1 SV=1 - [CH60_RAT]	1	23	37	273	1.38198	1.01379	0.866545	0.983953	0.990713	1.09088	1.05965	1.14264	1.07351	0.906201	0.878762	0.887361	0.876886	1.0261	1.02933	0.889316	1.12569	0.995943	1.12001	1.05852	0.914886	1.26438	0.928826	1.07658	0.990466	0.946456	1.0608	1.02678	1.27082	1.1158	0.905212	0.733775	1.07808	1.0909	0.990538	0.945748	1140.28	61.08	60.9174	6.17627
P05545	Serine protease inhibitor A3K OS=Rattus norvegicus OX=10116 GN=Serpina3k PE=1 SV=3 - [SPA3K_RAT]	2	7	21	179	1.47428	0.857778	0.753613	1.02306	0.475608	1.11201	1.35961	1.10643	1.78958	0.716715	1.0832	1.47133	0.661411	0.926751	0.963334	1.61621	0.611574	1.14438	0.911435	1.26053	0.608325	1.37202	0.667139	0.798195	0.599121	1.00448	1.2495	1.28103	1.18898	0.979727	0.564706	0.973545	1.09127	0.92329	1.26487	0.782828	875.557	62.98	46.5321	5.43994
P20059	Hemopexin OS=Rattus norvegicus OX=10116 GN=Hpx PE=1 SV=3 - [HEMO_RAT]	1	16	31	469	1.06725	0.809757	0.948843	1.16438	0.281781	0.841637	0.722656	0.920727	1.95752	0.501816	1.35396	1.0175	0.946424	0.983029	0.823858	1.34122	0.684579	1.08395	0.879323	1.35799	0.726122	1.37076	0.79231	0.76804	1.16349	1.69286	1.63519	1.28601	0.555879	0.970273	0.400289	1.51685	1.05985	1.25218	1.28208	0.807662	1026.06	62.17	51.3183	7.6499
B0K008	Eukaryotic translation initiation factor 1 OS=Rattus norvegicus OX=10116 GN=Eif1 PE=1 SV=1 - [B0K008_RAT]	3	1	4	12		0.844199	1.40096			0.866806	1.13175			0.671299	1.21838			0.714397	0.651064			0.846764	1.49597			0.976509	0.768587			1.00654	1.1737			0.959303	0.99765			0.874268	1.24469		60.5133	48.67	12.7386	7.44482
D4A9P7	BolA family member 2 OS=Rattus norvegicus OX=10116 GN=Bola2 PE=1 SV=1 - [D4A9P7_RAT]	1	2	4	7	1.05483				0.812927				1.48069				1.90646				0.945504				0.770248				0.813556				1.15381				0.975223				57.2372	62.79	10.1802	5.78271
P62775	Myotrophin OS=Rattus norvegicus OX=10116 GN=Mtpn PE=1 SV=2 - [MTPN_RAT]	1	3	6	27	1.10945	0.891931	1.43039	0.981674	0.799031	1.29917	1.05915	1.13648	1.62014	0.70173	1.19385	1.32613	1.76515	1.09433	0.524652	0.914687	0.681919	0.921339	1.43536	1.09655	0.700306	1.32338	0.689141	1.16487	0.829289	1.19271	1.21734	1.00416	1.40031	0.986674	0.94378	1.44961	0.961273	1.00282	1.11648	0.901607	126.603	46.61	12.8526	5.51611
Q62969	Prostacyclin synthase OS=Rattus norvegicus OX=10116 GN=Ptgis PE=2 SV=1 - [PTGIS_RAT]	3	12	25	121	0.552164	1.03378	0.989177	1.05525	1.53029	1.15547	0.736391	0.928386	0.742582	1.05995	0.966559	0.941392	0.61793	1.21189	1.10567	1.4826	1.28449	0.931054	0.789392	0.80284	1.34634	1.15395	1.18487	1.04487	1.09562	1.00281	0.806695	0.817185	0.625688	0.939226	1.09618	1.09664	1.19045	0.923885	0.925406	1.14519	513.337	54.09	57.0917	6.81494
P09495	Tropomyosin alpha-4 chain OS=Rattus norvegicus OX=10116 GN=Tpm4 PE=1 SV=3 - [TPM4_RAT]	2	6	25	334	1.25418	0.958799	2.01013	0.788157	0.707625	0.907903	0.791919	1.11137	2.17861	0.68012	0.9398	1.37528	1.80026	0.773659	0.299746	0.559884	0.615125	0.970389	1.83219	1.29475	0.727185	0.559933	0.462804	1.07347	0.765232	1.46023	1.16651	1.16255	2.10239	0.991448	0.6749	1.80412	0.770211	1.79569	1.10556	0.623352	931.355	59.68	28.4925	4.69092
P31044	Phosphatidylethanolamine-binding protein 1 OS=Rattus norvegicus OX=10116 GN=Pebp1 PE=1 SV=3 - [PEBP1_RAT]	1	6	7	50	1.47452	0.708041	1.85091	0.866352	0.930164	1.09464	1.03179	1.26729	1.65158	0.688472	0.979442	1.41302	1.228	0.937033	0.441116	1.08023	0.694895	0.80447	1.49639	1.09976	0.69483	1.24497	0.537631	1.03018	1.04754	1.17169	1.13484	1.03673	1.26368	0.901711	0.694758	1.62007	0.847418	1.32253	1.09148	0.75075	255.993	62.03	20.7884	5.79541
Q5U362	Annexin OS=Rattus norvegicus OX=10116 GN=Anxa4 PE=1 SV=1 - [Q5U362_RAT]	2	12	20	100	1.0373	0.94478	0.997931	0.965693	1.2983	1.05931	0.943988	0.992997	1.10504	1.01035	0.968429	0.946946	0.807144	1.14624	1.10221	1.3135	0.99012	0.937509	0.927312	0.79614	1.07476	1.29125	1.19195	0.911793	1.00763	1.01764	0.80203	0.789461	0.775799	0.915011	1.10001	1.11762	1.23487	0.869967	0.896363	1.19697	455.79	49.84	35.8711	5.56689
D3ZJA4	RCG32337, isoform CRA_a OS=Rattus norvegicus OX=10116 GN=Svs6 PE=4 SV=1 - [D3ZJA4_RAT]	1	4	8	21			0.724139	0.319826			8.78242	0.468785			0.559264	0.286599			0.827823	0.372842			0.569085	0.286431			1.63935	0.283117			0.670991	7.05193			0.625385	0.598177			0.692097	0.438759	285.404	47.47	11.3577	5.63037
M0RBF1	Complement C3 OS=Rattus norvegicus OX=10116 GN=C3 PE=1 SV=1 - [M0RBF1_RAT]	3	55	94	695	1.14441	1.05085	0.817508	1.48276	0.434315	0.73621	0.66976	0.642603	0.905999	0.683937	1.16496	0.721058	0.930795	1.09831	1.30755	1.69459	1.08515	1.00571	0.595627	0.981882	1.22994	1.27984	1.28034	0.772414	1.5298	1.3471	1.33747	1.1588	0.466765	0.842924	0.566032	0.835326	1.54789	0.847827	1.13881	0.99615	2417.28	53.46	186.206	6.46826
A0A0G2JSM3	PDZ and LIM domain 3, isoform CRA_a OS=Rattus norvegicus OX=10116 GN=Pdlim3 PE=1 SV=1 - [A0A0G2JSM3_RAT]	4	10	18	137	1.16114	0.868081	2.28393	0.928938	0.586934	0.851349	0.884177	1.19286	1.34363	0.671477	0.951692	1.02417	2.78729	0.912916	0.645813	0.504361	0.642545	1.14851	1.71116	1.28428	0.762587	0.481679	0.728479	1.29851	0.654533	1.15782	1.02323	1.17742	1.46608	0.884541	0.904733	1.18743	0.732704	1.22142	0.889359	0.820575	566.889	57.91	34.3963	7.91357
P13803	Electron transfer flavoprotein subunit alpha, mitochondrial OS=Rattus norvegicus OX=10116 GN=Etfa PE=1 SV=4 - [ETFA_RAT]	1	7	14	66	1.18889	0.906858	0.858398	0.900607	0.687961	0.959594	1.18496	1.27171	1.24428	0.906365	0.846087	1.11478	0.895961	0.893607	0.990842	1.22761	1.18599	0.824422	1.04103	1.20322	0.713274	1.7466	0.982695	1.03366	0.936438	0.973675	1.1712	1.19743	1.35289	0.978639	0.679819	1.08336	1.09371	1.12832	1.13887	0.871841	239.09	48.95	34.9295	8.38232
P68255	14-3-3 protein theta OS=Rattus norvegicus OX=10116 GN=Ywhaq PE=1 SV=1 - [1433T_RAT]	3	8	17	150	0.893375	1.00014	1.13872	1.07509	1.09186	1.21587	0.919218	0.931769	1.06085	0.999892	1.03973	0.936276	0.979362	1.13867	0.844505	1.01913	1.1252	1.07976	0.979175	0.865837	0.892436	1.11479	1.05494	1.00024	0.957758	0.992776	0.90725	0.978995	0.903221	1.17373	1.0872	1.07527	1.11188	0.981804	0.993699	1.16444	450.09	61.22	27.7608	4.77979
P11598	Protein disulfide-isomerase A3 OS=Rattus norvegicus OX=10116 GN=Pdia3 PE=1 SV=2 - [PDIA3_RAT]	2	18	33	209	1.05038	1.01486	0.909067	1.15323	1.15813	1.13581	0.884736	1.02639	1.23174	0.893076	1.11792	1.00424	0.933892	1.09447	0.871812	0.965071	0.876348	0.92588	1.26707	1.03079	0.884317	0.919862	0.937457	0.993641	0.967674	1.0812	1.13482	1.12505	1.03549	0.987583	0.941657	0.822501	0.990067	1.00065	1.11494	1.09158	740.439	53.27	56.5877	6.21436
P11232	Thioredoxin OS=Rattus norvegicus OX=10116 GN=Txn PE=1 SV=2 - [THIO_RAT]	2	6	8	97	0.455443	0.838505	1.06886	0.966809	1.0783	1.12033	1.00205	1.20113	1.69807	0.633181	1.37867	1.15634	0.65136	0.882612	0.638851	1.1809	0.846854	0.885623	1.10427	1.04655	0.804475	1.08768	0.698793	0.978868	0.948124	1.06586	1.22566	1.31945	1.07383	0.955007	0.967553	1.03209	0.825996	1.17013	1.39167	0.943428	322.97	60.95	11.6657	4.91943
P12346	Serotransferrin OS=Rattus norvegicus OX=10116 GN=Tf PE=1 SV=3 - [TRFE_RAT]	3	41	64	931	1.57374	0.90521	0.486625	1.20004	0.300864	0.926068	0.669391	0.755962	1.5096	0.432335	1.24246	0.791733	0.712419	1.15128	1.14357	1.5386	0.853073	1.04601	0.625428	1.16015	1.03934	1.80883	0.831339	0.675715	1.25204	1.66321	1.59808	1.23207	0.409828	0.925441	0.367906	0.853811	1.42123	0.947649	1.51669	1.01343	2756.67	60.74	76.3456	7.28369
P50399	Rab GDP dissociation inhibitor beta OS=Rattus norvegicus OX=10116 GN=Gdi2 PE=1 SV=2 - [GDIB_RAT]	1	7	18	85	0.920672	0.94139	0.761306	1.1699	0.976763	1.10581	1.29432	0.900357	0.906066	1.10608	1.11651	1.13609	0.755009	1.14511	1.13172	1.25104	0.885651	0.91835	0.709411	0.916278	0.931035	1.11499	1.28945	1.04168	1.19711	0.847821	0.909109	0.938818	0.71481	0.979392	1.15148	1.0123	1.32534	0.796618	1.0271	1.14312	323.76	43.82	50.5047	6.25244
P04906	Glutathione S-transferase P OS=Rattus norvegicus OX=10116 GN=Gstp1 PE=1 SV=2 - [GSTP1_RAT]	2	7	12	56	0.694639	0.805842	0.868507	1.01793	1.46523	0.972565	0.834317	0.824618	1.01671	0.922152	1.03433	1.06723	0.667404	1.18181	0.93576	1.26891	1.1412	0.752038	0.885202	0.797794	0.929595	1.26644	1.05762	0.95448	1.04008	0.828988	0.810719	0.86822	0.65896	0.770193	0.88996	1.37688	1.2105	0.954986	1.05423	1.19865	173.79	60.48	23.4241	7.35693
G3V8C4	Chloride intracellular channel protein OS=Rattus norvegicus OX=10116 GN=Clic4 PE=1 SV=1 - [G3V8C4_RAT]	2	5	12	40		0.973762	0.959034	1.04483		1.05082	0.980335	0.95428		1.02173	1.02121	1.12264		1.12055	1.18643	1.09584		0.89861	1.21144	0.773452		0.835103	1.12109	1.11746		1.02107	0.995842	1.05009		1.07778	0.987826	1.12639		0.921417	1.01809	1.11485	124.284	57.71	28.6507	5.59229
P69897	Tubulin beta-5 chain OS=Rattus norvegicus OX=10116 GN=Tubb5 PE=1 SV=1 - [TBB5_RAT]	2	3	24	260	0.666814	1.22815	1.01984	1.10256	1.02017	1.10491	1.03367	0.992297	1.03034	1.19809	1.07595	0.991199	0.629012	1.04538	1.1741	0.631863	1.05841	1.05691	1.0081	0.927542	1.17789	0.756099	1.11771	0.989766	0.711473	1.04545	1.13507	1.17316	1.21032	1.27267	1.33576	0.774255	0.941797	0.946433	0.983587	1.09098	1018.28	54.73	49.639	4.89404
P04785	Protein disulfide-isomerase OS=Rattus norvegicus OX=10116 GN=P4hb PE=1 SV=2 - [PDIA1_RAT]	1	16	32	216	1.01827	0.91762	0.904415	1.08574	1.13903	1.17727	0.95891	1.16007	1.12479	0.809667	1.20869	0.984975	0.893828	1.07868	0.836313	0.987871	0.869574	0.906833	1.26363	1.0808	0.849737	0.860704	0.842606	1.04119	0.99967	0.930681	1.08388	1.10575	1.08681	0.92576	1.01309	0.946179	1.06643	0.955814	1.11546	0.944026	705.903	54.81	56.9157	4.93213
D4ACV3	Histone H2A OS=Rattus norvegicus OX=10116 GN=Hist2h2ac PE=3 SV=2 - [D4ACV3_RAT]	19	2	6	47	0.839817	1.35888	0.956755	0.811712	0.796572	0.82619	1.06218	0.91661	0.56959	1.7274	1.0438	0.719034	0.565654	0.874803	1.23286	0.405255	1.27687	1.66653	0.879849	1.23266	1.56568	0.533717	1.39821	1.15035	0.409863	1.1205	1.05985	0.850799	1.25029	1.53564	2.53647	0.971695	0.717334	1.34084	0.567695	0.917276	144.329	52.38	13.6366	10.8579
P15999	ATP synthase subunit alpha, mitochondrial OS=Rattus norvegicus OX=10116 GN=Atp5f1a PE=1 SV=2 - [ATPA_RAT]	3	21	34	319	0.936106	1.17473	0.807385	1.09778	1.32107	1.0485	1.03119	0.846513	0.690052	1.19956	0.854738	0.79385	0.786176	1.17062	1.21293	1.02359	1.17048	1.06582	0.727164	0.836457	1.38452	0.991256	1.21481	1.06589	1.03376	0.840371	0.777998	0.789004	0.685093	1.03137	1.27474	0.781307	1.09264	0.871599	0.896382	1.19736	1174.95	55.15	59.7166	9.18799
M0RAM5	Glutathione peroxidase OS=Rattus norvegicus OX=10116 GN=Gpx1 PE=1 SV=1 - [M0RAM5_RAT]	2	2	8	33	0.92111	0.932961	1.07387		0.897149	1.10367	1.12409		1.19793	0.861792	0.989427		0.743958	0.855462	1.00704		0.93517	1.07237	1.25367		0.876502	1.17391	0.996813		0.882842	0.853072	1.22424		1.07465	1.08669	1.02494		1.00608	0.908473	1.28854		77.68	54.5	22.1414	7.86963
O35244	Peroxiredoxin-6 OS=Rattus norvegicus OX=10116 GN=Prdx6 PE=1 SV=3 - [PRDX6_RAT]	1	4	11	42	1.16783	0.753127	1.30835	0.842418	0.74123	0.98445	1.0141	1.18645	1.49337	0.759828	0.960299	1.40963	1.84484	0.873736	0.683904	1.15456	0.761803	1.02678	1.32205	1.16556	0.758145	1.1716	0.661858	0.977003	0.765444	0.989506	1.11331	1.09565	1.24932	0.756741	0.724948	1.57245	0.971514	1.23192	1.12783	0.748598	176.45	52.68	24.803	5.93506
Q62636	Ras-related protein Rap-1b OS=Rattus norvegicus OX=10116 GN=Rap1b PE=1 SV=2 - [RAP1B_RAT]	2	8	12	103	0.875029	1.09004	0.781778	1.29482	1.28686	1.0065	0.909664	0.941985	0.758254	1.11906	0.916706	0.841739	0.687761	1.11875	1.41205	1.5673	0.90189	0.964704	0.744573	0.772684	1.3873	1.33792	1.20717	1.01983	0.995639	0.732432	0.777045	0.896029	0.576249	0.916541	1.10346	0.834746	1.14529	0.839375	1.03225	1.29115	387.396	54.89	20.7846	5.78271
P14141	Carbonic anhydrase 3 OS=Rattus norvegicus OX=10116 GN=Ca3 PE=1 SV=3 - [CAH3_RAT]	1	10	14	158	0.893729	0.640063	1.12457	0.899998	0.44047	0.713752	2.04793	0.696509	1.86315	0.655969	1.01188	1.6653	1.06897	0.576982	0.778026	1.70782	0.438313	0.946747	0.484692	1.33251	0.411548	0.706702	0.793522	0.807856	0.62534	1.40542	2.03674	1.30608	1.6354	1.35844	0.664395	0.966519	0.662009	1.10249	1.27365	0.578958	434.419	55.77	29.4127	7.37158
M0RC65	Cofilin 2 OS=Rattus norvegicus OX=10116 GN=Cfl2 PE=1 SV=1 - [M0RC65_RAT]	1	2	9	58	0.773274	1.18121	0.950254	0.616128	1.15232	1.23749	1.08129	1.14017	1.18596	0.991959	1.06793	1.00287	0.663616	1.20955	0.810143	1.54207	0.98081	1.09134	0.938576	0.850857	1.03175	1.28664	0.892381	1.05431	1.25378	0.999357	1.1397	1.13927	1.1765	1.28731	1.04902	1.42222	1.16894	0.924533	1.19744	1.03278	204.604	51.2	18.6978	7.88428
A0A0H2UHM3	Haptoglobin OS=Rattus norvegicus OX=10116 GN=Hp PE=1 SV=1 - [A0A0H2UHM3_RAT]	2	15	25	309	1.17965	0.69053	0.609012	1.50834	0.192409	0.726346	0.443327	1.04219	2.15646	0.37163	1.66683	0.746683	0.482618	0.936043	0.894889	1.39944	0.711919	1.04817	0.995282	1.60096	0.702717	1.32519	0.739406	0.685728	1.32388	1.62627	1.96019	1.66439	0.363874	0.855381	0.279473	0.804915	1.14787	0.996394	1.70577	0.776482	1162.93	55.78	38.4075	6.53662
Q6PDW1	40S ribosomal protein S12 OS=Rattus norvegicus OX=10116 GN=Rps12 PE=1 SV=1 - [Q6PDW1_RAT]	4	2	7	39	1.06399	0.840792	1.42753	1.00226	1.58619	1.07256	0.992189	1.47584	0.657408	0.832198	0.879176	1.27098	1.60396	0.959048	0.708601	0.691112	1.737	1.01078	1.69046	1.31575	1.62638	0.712697	0.663441	1.28572	1.34129	1.10984	1.12184	1.17452	1.01242	0.991387	0.871705	1.76366	0.713155	1.37329	0.942777	0.871023	173.183	58.33	14.5055	7.21045
A0A0G2JSH9	Peroxiredoxin-2 OS=Rattus norvegicus OX=10116 GN=Prdx2 PE=1 SV=1 - [A0A0G2JSH9_RAT]	2	8	10	177	1.2418	0.739454	0.603533	1.2913	0.740845	1.00902	1.39435	1.12582	1.3281	0.854428	1.11661	1.77433	0.835663	0.776383	0.871887	1.2312	0.729575	0.804393	1.43742	1.09138	0.866299	0.939713	0.734649	0.925778	0.853937	0.761799	1.34773	1.30335	1.16329	0.731019	0.725092	0.838112	0.846573	0.741076	1.36883	0.813761	521.244	58.08	21.7841	5.59229
P47967	Galectin-5 OS=Rattus norvegicus OX=10116 GN=Lgals5 PE=1 SV=2 - [LEG5_RAT]	1	1	6	30	1.97509	0.704763	0.395741	1.22718	0.74517	0.565684	0.910611	1.26677	0.0973288	1.52301	1.30605	0.226585	0.590729	0.817974	1.96972	3.68215	0.935927	0.680933	1.10237	0.505751	1.37912	0.787808	0.711047	0.951743	1.22595	0.495333	1.30099	0.390288	0.64307	0.401882	0.743224	0.314658	1.01248	0.612046	1.98537	1.18238	120.8	49.66	16.186	6.66846
P04642	L-lactate dehydrogenase A chain OS=Rattus norvegicus OX=10116 GN=Ldha PE=1 SV=1 - [LDHA_RAT]	1	10	17	180	0.908773	0.946578	0.738139	1.08973	1.15668	1.13756	1.16379	0.898023	0.943711	1.12853	1.03593	1.05007	0.885998	1.12129	1.12386	1.18768	1.01316	1.00859	0.553544	0.831008	0.824814	1.18622	1.24087	0.966949	1.07777	0.957675	1.02449	0.928897	0.703195	1.04303	0.961131	0.788807	1.33756	0.959489	1.04618	0.974287	1013.43	54.82	36.4273	8.26514
P68511	14-3-3 protein eta OS=Rattus norvegicus OX=10116 GN=Ywhah PE=1 SV=2 - [1433F_RAT]	4	3	12	79	0.367306	1.04138	1.18792		1.40444	1.06834	0.826783		1.10825	0.938333	1.08577		0.459508	1.09323	0.74283		1.21796	0.994233	0.696143		0.907726	0.98698	1.0208		0.922111	1.12115	0.855833		0.877533	1.19866	1.24419		1.21443	0.982335	0.956447		215.647	37.4	28.194	4.89404
Q8VIF7	Methanethiol oxidase OS=Rattus norvegicus OX=10116 GN=Selenbp1 PE=1 SV=1 - [SBP1_RAT]	2	10	21	108	0.914002	0.928401	0.74287	1.38285	1.64201	0.908571	0.806053	1.10652	0.873013	0.806622	0.99929	0.787234	0.727281	0.907253	1.37841	1.50817	1.10497	0.8893	0.933753	0.912241	1.24547	1.15929	0.818145	0.977602	1.0849	0.653652	0.951208	0.873937	0.695661	0.737822	0.92722	1.21636	1.29757	0.851935	1.0245	1.18988	351.924	53.18	52.4985	6.56592
G3V8L3	Lamin A, isoform CRA_b OS=Rattus norvegicus OX=10116 GN=Lmna PE=1 SV=1 - [G3V8L3_RAT]	6	23	42	238	0.551128	1.20979	1.15147	0.895276	0.986728	0.81286	1.04643	1.19481	0.895446	1.13078	1.00639	0.704153	0.623058	0.732963	0.877754	0.312664	1.40372	1.43642	1.04438	1.12976	1.64897	0.278778	1.08926	1.21211	0.469605	1.08955	1.07215	1.12451	1.34225	1.20675	1.70761	0.581751	0.649504	0.902966	0.631633	1.01904	725.532	48.42	74.2667	6.97607
B2RZD6	NDUFA4, mitochondrial complex-associated OS=Rattus norvegicus OX=10116 GN=Ndufa4 PE=1 SV=1 - [B2RZD6_RAT]	1	3	8	28	0.869032	1.26094	1.02172	0.948176	1.30133	0.976405	1.06637	1.13564	0.79494	0.803665	0.962627	1.24731	1.52294	0.920454	1.02731	0.999931	1.1305	0.892722	0.829003	1.04485	1.54445	1.5208	1.00043	0.967475	1.07181	1.24376	0.950711	1.06029	0.952206	1.34977	1.0774	1.04371	0.88718	0.952662	1.04481	0.942144	106.403	56.1	9.32087	9.5249
Q5XI07	Lipoma-preferred partner homolog OS=Rattus norvegicus OX=10116 GN=Lpp PE=1 SV=1 - [LPP_RAT]	1	14	27	221	1.39607	1.443	1.74262	0.932433	0.917638	0.910125	0.883418	1.16163	0.829831	0.992513	0.965151	0.746749	1.82402	0.911153	0.779023	0.324324	1.21565	1.25559	1.59616	1.17484	1.24017	0.440892	0.968952	1.21602	0.666667	1.31437	0.985558	1.35115	1.15517	0.930162	0.995864	0.66673	0.745547	1.39705	0.679705	0.901491	625.712	45.25	68.2161	7.66455
C0JPT7	Filamin A OS=Rattus norvegicus OX=10116 GN=Flna PE=1 SV=1 - [C0JPT7_RAT]	1	81	140	1554	0.943862	1.55774	1.1154	0.668832	0.734259	0.607751	1.2239	0.796324	0.3455	1.19926	0.899356	0.416509	0.789098	0.608531	0.683037	0.241317	1.63199	1.71804	0.849242	1.32015	1.82868	0.345193	1.64781	1.38245	0.436989	1.07461	0.746449	1.09593	0.919895	1.88242	2.27452	0.494961	0.474754	0.823571	0.559991	0.871345	5818.76	53.39	280.32	6.03662
Q6GMN8	Actn1 protein OS=Rattus norvegicus OX=10116 GN=Actn1 PE=1 SV=1 - [Q6GMN8_RAT]	5	18	47	502	0.977536	1.2657	1.14499	0.925325	0.931878	0.931133	0.794034	0.923321	0.766496	1.11872	0.779944	0.685653	1.07994	0.838132	0.991557	0.389978	1.14881	1.66601	0.8155	1.07644	1.68095	0.442814	1.38297	1.01278	0.783085	1.00121	0.915256	0.947571	1.24025	1.43663	1.56795	0.600968	0.799333	1.08668	0.710881	1.09667	2039.49	52.76	102.547	5.47803
A0A0G2JXE0	Histone H2B OS=Rattus norvegicus OX=10116 GN=LOC102549061 PE=3 SV=1 - [A0A0G2JXE0_RAT]	14	7	9	264	0.941387	1.13404	1.28848	0.7398	0.639623	0.81246	1.08266	1.08836	0.849205	1.45764	0.925272	0.661791	0.941976	0.593933	0.974805	0.293884	1.04151	1.25983	1.02768	1.17422	1.26422	0.300462	1.07157	1.02192	0.695858	0.889848	1.18137	0.977288	2.14156	1.30231	1.86921	0.661706	0.583154	1.11409	0.661698	0.94383	875.551	55.56	13.9136	10.3159
Q5RKI0	WD repeat-containing protein 1 OS=Rattus norvegicus OX=10116 GN=Wdr1 PE=1 SV=3 - [WDR1_RAT]	1	21	34	325	0.790654	1.19274	0.771841	1.07638	1.14383	1.06769	1.01954	0.81993	0.690842	1.14376	1.00174	0.699157	0.571582	1.2844	1.05498	0.578941	1.25903	1.15013	0.68217	0.776876	1.28924	0.666065	1.46949	1.05842	0.923856	0.900382	0.847331	0.926614	0.722539	1.25256	1.41313	0.629683	1.2519	0.773605	0.899527	1.49294	1265.54	55.12	66.1399	6.62451
P16617	Phosphoglycerate kinase 1 OS=Rattus norvegicus OX=10116 GN=Pgk1 PE=1 SV=2 - [PGK1_RAT]	4	12	19	184	0.957759	0.99188	0.710734	1.10264	1.11578	1.12435	1.19444	0.859096	0.881364	1.15447	0.969586	0.962492	0.759652	1.0835	1.12022	1.13266	1.00391	1.04073	0.705205	0.81464	0.845431	1.05617	1.16682	0.950573	1.04836	0.885595	0.934832	0.896366	0.781104	1.06784	0.994968	0.855329	1.20758	0.866061	0.981346	1.13786	509.684	51.32	44.51	7.89893
Q4V8H8	EH domain-containing protein 2 OS=Rattus norvegicus OX=10116 GN=Ehd2 PE=1 SV=1 - [EHD2_RAT]	1	17	29	249	0.883613	1.13399	1.24133	0.960993	1.25536	1.05928	0.95753	1.19883	0.871745	1.02039	0.931397	0.856309	0.905831	1.0713	1.25575	0.666791	1.10706	1.15536	0.973945	0.792896	1.36283	0.645965	1.05339	0.960844	0.94093	0.924323	0.929236	0.907962	0.992271	1.0046	1.16119	0.791165	1.03758	1.11534	0.7497	1.14299	768.977	50.28	61.1988	6.55127
D3ZCZ9	NADH dehydrogenase [ubiquinone] iron-sulfur protein 6, mitochondrial OS=Rattus norvegicus OX=10116 GN=LOC100912599 PE=1 SV=1 - [D3ZCZ9_RAT]	2	1	4	13	1.33966	0.856513	1.82098	0.64114	0.970857	0.872863	1.12322	1.6118	1.01275	0.636834	0.933456	1.4904	1.62819	0.780047	0.632694	0.544209	1.31259	0.931226	1.96201	1.48981	1.00068	1.00184	0.572518	1.15679	1.04084	1.00059	1.17461	0.992455	1.3026	0.950692	0.848747	1.48816	0.806218	1.53512	1.10325	0.755861	112.34	46.55	13.0317	9.21729
F1M229	Uncharacterized protein OS=Rattus norvegicus OX=10116 PE=1 SV=3 - [F1M229_RAT]	6	5	9	72	0.536037	0.672238	0.663648	1.47715	0.710051	0.749225	0.405101	0.655022	2.86085	0.806336	0.835854	1.08941	0.755821	0.75424	0.75365	0.512108	1.36633	1.03438	0.959238	1.17659	1.23807	1.27341	0.588648	0.579219	0.847626	1.39872	1.33757	0.785323	1.62698	1.07075	0.557671	0.537417	1.33655	0.826752	0.707094	0.886662	159.207	55.03	20.9201	5.90967
Q5RJR9	Serine (Or cysteine) proteinase inhibitor, clade H, member 1, isoform CRA_b OS=Rattus norvegicus OX=10116 GN=Serpinh1 PE=1 SV=1 - [Q5RJR9_RAT]	2	10	20	151	1.0374	0.976606	1.01379	1.04821	1.14932	0.937933	0.939326	0.987677	0.90146	1.09352	0.943061	1.10721	1.01878	0.986385	1.12449	1.27078	0.893286	0.906602	0.928866	0.93774	1.02395	0.864566	1.05409	1.32052	0.935685	1.06372	0.90542	0.97235	1.16666	1.00057	1.22046	0.850524	0.989807	0.819247	1.04598	1.10763	569.609	54.92	46.5322	8.82178
Q5U1Y3	Filamin-binding LIM protein 1 OS=Rattus norvegicus OX=10116 GN=Fblim1 PE=2 SV=1 - [Q5U1Y3_RAT]	2	13	16	118	1.25473	1.29299	1.42993	0.801637	0.769228	0.79589	0.908244	0.926258	0.754849	1.15585	1.11736	0.708988	1.66202	0.719681	0.629102	0.447233	0.993532	1.13282	1.65721	1.49126	1.10161	0.282688	0.86519	1.19959	0.771266	1.37582	0.944368	1.47516	1.47511	1.11236	1.07317	0.748559	0.635785	1.33219	0.907125	0.800272	452.149	45.95	38.2029	6.1001
G3V9U2	3-ketoacyl-CoA thiolase, mitochondrial OS=Rattus norvegicus OX=10116 GN=Acaa2 PE=1 SV=3 - [G3V9U2_RAT]	3	13	20	124	1.03948	0.701281	0.513828	0.736061	1.29213	0.666582	1.52647	1.1389	0.810641	0.651084	0.921497	0.902353	1.06377	0.858295	1.11106	1.26514	1.47506	0.730903	0.587518	1.2343	1.49642	3.06784	1.35188	0.94611	1.45619	0.826964	1.31485	1.17001	0.75469	0.98042	0.469788	0.585655	0.7932	1.4518	1.0379	0.794053	419.455	49.87	41.8585	8.14795
G3V852	RCG55135, isoform CRA_b OS=Rattus norvegicus OX=10116 GN=Tln1 PE=1 SV=1 - [G3V852_RAT]	5	62	111	806	1.05915	1.39536	1.13053	0.886393	0.907916	0.72291	1.08558	0.970487	0.494187	1.31221	0.971876	0.571076	1.00391	0.690242	1.0488	0.353415	1.50693	1.56864	1.1177	1.15531	1.65208	0.347242	1.33633	1.26376	0.498713	1.01442	0.755396	0.96765	0.98077	1.42537	1.72734	0.582168	0.673572	1.0416	0.676904	1.06355	3360.29	47.5	269.504	6.20166
D4A7U1	Zyxin OS=Rattus norvegicus OX=10116 GN=Zyx PE=1 SV=1 - [D4A7U1_RAT]	1	15	24	254	1.06201	1.05208	1.81272	0.796397	0.717638	0.963298	0.951053	1.05412	1.31989	0.83399	1.03973	0.924846	2.20566	0.811462	0.494833	0.28541	0.748466	1.06207	1.91112	1.25362	0.909412	0.350266	0.735275	1.11662	0.801059	1.45713	1.07411	1.33031	1.39484	0.985246	0.818408	1.14869	0.693456	1.38127	0.950207	0.775619	1134.58	47.34	60.2648	6.46826
D4A0T0	NADH:ubiquinone oxidoreductase subunit B10 OS=Rattus norvegicus OX=10116 GN=Ndufb10 PE=1 SV=1 - [D4A0T0_RAT]	1	2	7	20	0.906267	0.770137	1.5725		0.642294	1.01112	1.26439		1.62587	0.500326	1.09951		1.4631	0.682922	0.604338		0.872811	0.771389	1.52772		0.795167	1.21087	0.614437		1.12705	1.01005	1.15901		1.61701	1.04225	0.756741		0.790069	1.5935	1.14622		101.307	31.82	20.8454	7.69385
P04797	Glyceraldehyde-3-phosphate dehydrogenase OS=Rattus norvegicus OX=10116 GN=Gapdh PE=1 SV=3 - [G3P_RAT]	22	13	16	263	0.984058	1.08723	0.724787	1.08229	1.12855	1.08009	1.28096	0.94423	0.91778	1.11047	1.05535	1.08893	0.775988	1.07498	1.04589	1.16607	1.01935	0.994516	0.68393	0.808324	0.956234	1.13041	1.17693	1.05765	1.16163	0.898042	1.06711	0.975422	0.854539	1.15474	1.11526	0.751985	1.12086	0.858573	1.02675	1.05105	1119.89	51.65	35.8052	8.03076
P85108	Tubulin beta-2A chain OS=Rattus norvegicus OX=10116 GN=Tubb2a PE=1 SV=1 - [TBB2A_RAT]	3	2	20	239	1.05126		0.629457	0.999715	1.07212		0.993975	1.01549	0.761067		0.979391	0.69265	0.777914		1.31844	0.58694	1.03918		0.759889	0.987381	1.06755		1.05161	1.23184	0.658006		1.00293	1.0565	1.15337		1.35452	0.689416	1.06164		0.845885	1.04734	818.052	49.44	49.875	4.89404
A0A0G2K013	Alpha-actinin-4 OS=Rattus norvegicus OX=10116 GN=Actn4 PE=1 SV=1 - [A0A0G2K013_RAT]	4	14	43	407	0.915393	1.4068	1.19016	0.814021	0.631573	0.994464	0.862509	0.792269	0.887778	1.28842	0.949888	0.807342	0.831149	0.899465	0.857777	0.633312	0.823512	1.42302	0.867247	1.06702	1.01929	0.493083	1.47868	1.02558	0.821912	1.23713	1.089	0.975382	1.53016	1.45023	1.48405	0.772803	0.824863	1	0.819769	0.927464	1811.21	48.77	102.908	5.50342
P42123	L-lactate dehydrogenase B chain OS=Rattus norvegicus OX=10116 GN=Ldhb PE=1 SV=2 - [LDHB_RAT]	1	10	15	144	0.802237	0.946192	0.798828	1.06256	1.25959	1.21306	0.963477	0.780438	0.740045	1.21866	1.08743	1.21714	0.450328	1.18667	1.0148	1.47525	0.958334	0.788559	0.701285	0.731175	0.974877	1.39529	0.972265	0.788728	1.27439	0.923035	0.897756	0.889226	0.600284	0.930622	0.90188	0.870313	1.49339	1.1463	1.20666	1.24002	834.822	51.5	36.5891	6.04932
P48037	Annexin A6 OS=Rattus norvegicus OX=10116 GN=Anxa6 PE=1 SV=2 - [ANXA6_RAT]	2	23	43	364	0.770345	1.05453	0.90412	1.08643	1.25698	1.11203	0.996019	0.938242	0.849694	1.12312	1.07273	0.920232	0.72341	1.23087	1.10524	1.16051	0.994691	0.986767	0.830083	0.733582	1.00256	1.12173	1.17957	0.962528	1.08685	0.911318	0.813361	0.894125	0.747175	1.01702	1.24928	0.907536	1.16976	0.862677	0.894836	1.18179	1221.28	49.33	75.7065	5.56689
A0A1W2Q6E9	Moesin OS=Rattus norvegicus OX=10116 GN=Msn PE=1 SV=1 - [A0A1W2Q6E9_RAT]	4	14	39	241	0.915835	1.15223	1.11311	1.07031	1.13673	1.16495	0.936869	0.900762	1.00409	1.17564	0.936905	0.866223	0.892329	1.19353	1.01897	0.677375	0.970296	1.08677	0.849544	0.831037	0.9031	0.745759	1.21047	1.09208	0.997999	0.979066	0.882984	0.928138	0.855132	0.97209	1.11062	0.819526	1.30239	0.926429	0.842399	1.08309	630.713	46.7	67.6098	6.46826
P67779	Prohibitin OS=Rattus norvegicus OX=10116 GN=Phb PE=1 SV=1 - [PHB_RAT]	2	5	10	39	0.880181	1.03003	0.931197	0.911364	0.891201	0.994595	1.23377	1.25268	0.895886	0.91038	0.786015	0.831295	0.730571	0.908132	1.219	1.37726	1.21095	1.03369	0.814231	1.07952	1.04735	1.22578	1.06482	1.56394	1.05251	0.901897	0.908459	1.07041	1.15513	1.17191	1.10699	1.49233	1.03144	1.10037	0.980547	0.973412	210.678	45.96	29.8019	5.75732
G3V7C6	Tubulin beta chain OS=Rattus norvegicus OX=10116 GN=Tubb4b PE=1 SV=2 - [G3V7C6_RAT]	4	2	24	254	0.771729	1.32327	1.12451	0.991296	1.13296	0.958771	0.959795	0.972744	1.01774	1.06665	0.906822	0.938781	0.963598	1.04719	0.958861	0.675833	1.26193	1.08505	0.918472	0.969369	1.20794	0.823392	1.03708	1.01329	0.855596	0.979132	0.999665	1.04593	1.49363	1.18234	0.789351	0.59146	1.04393	1.2317	0.651091	1.15305	880.463	48.72	61.1475	4.85596
Q9Z2L0	Voltage-dependent anion-selective channel protein 1 OS=Rattus norvegicus OX=10116 GN=Vdac1 PE=1 SV=4 - [VDAC1_RAT]	1	7	15	66	0.932235	1.13269	0.680002	0.951556	1.13035	0.985712	1.01887	0.817466	0.889424	0.967268	0.780151	0.953768	0.648698	1.00417	1.08533	1.26927	1.22043	1.03287	0.781379	0.955415	1.11203	1.60799	1.00114	0.833024	1.12448	0.887309	0.953743	0.809037	1.1143	1.08312	1.0762	0.727865	1.10617	0.860128	1.05905	1.13823	293.815	51.94	30.7366	8.54346
P27139	Carbonic anhydrase 2 OS=Rattus norvegicus OX=10116 GN=Ca2 PE=1 SV=2 - [CAH2_RAT]	1	6	11	73	1.18384	0.753288	0.625587	1.70906	0.624994	0.916366	1.90867	0.725052	0.707525	1.14618	1.26211	2.07909	0.41838	0.659493	0.984104	2.07273	0.864164	0.58567	0.71459	1.08479	1.28472	0.97721	1.04189	0.757177	1.03183	0.634675	1.26176	1.18188	0.586273	0.624005	0.823523	0.794551	0.907117	0.414499	1.52809	0.942	246.223	44.62	29.0956	7.40088
P08932	T-kininogen 2 OS=Rattus norvegicus OX=10116 PE=1 SV=2 - [KNT2_RAT]	5	5	27	269	1.36868	1.06449	0.561711	0.564392	0.139332	1.20854	0.179553	0.351271	4.3981	0.481568	0.726527	0.250406	1.84473	1.31562	0.237239	0.411429	0.693662	1.76043	0.651891	0.805076	0.764669	2.58176	0.285772	0.371298	1.3365	3.14132	0.978008	0.647232	0.635046	1.49881	0.177779	1.1131	1.49286	2.77264	0.803435	0.341403	1184.7	51.63	47.6734	6.354
P51635	Alcohol dehydrogenase [NADP(+)] OS=Rattus norvegicus OX=10116 GN=Akr1a1 PE=1 SV=2 - [AK1A1_RAT]	1	7	12	60	1.06393	0.897021	1.03305	0.980555	1.14709	1.10299	0.992458	0.930306	0.846117	0.945767	1.03698	1.14119	1.34079	1.12569	1.10602	1.35509	1.20926	0.906366	1.04264	1.03096	1.49892	1.20017	1.04349	0.997567	1.19102	1.01715	0.920759	0.851943	0.919067	0.90718	1.06062	1.2316	0.721132	1.01549	0.966327	1.07658	204.523	47.08	36.4829	7.31299
A0A0G2JY31	Alpha-1-antiproteinase OS=Rattus norvegicus OX=10116 GN=Serpina1 PE=1 SV=1 - [A0A0G2JY31_RAT]	3	13	18	207	1.20306	0.697915	0.710167	1.24721	0.389585	0.869425	1.05501	0.940678	1.60015	0.654291	1.0416	1.2869	0.961729	1.05688	0.966305	1.6833	0.588484	1.00434	0.769037	1.22031	0.748743	1.66306	0.826072	0.781172	1.1663	1.20879	1.54269	1.17282	0.615781	0.928734	0.478734	0.841494	1.29443	1.0473	1.26908	0.906046	878.31	48.66	46.0925	6.07471
A0A0G2JUA5	AHNAK nucleoprotein OS=Rattus norvegicus OX=10116 GN=Ahnak PE=1 SV=1 - [A0A0G2JUA5_RAT]	2	39	91	446	0.839377	1.05125	3.16003	0.675578	0.617971	0.725523	1.08304	1.32431	0.942164	0.784839	1.01757	0.775402	2.3269	0.633012	0.473832	0.328262	0.85419	1.22811	1.91478	1.59984	0.992297	0.317281	0.771533	1.36562	0.477939	1.34116	0.963626	1.15804	1.59168	1.12281	1.19599	0.820217	0.540616	1.41715	0.687129	0.63924	1513.02	43.56	580.754	6.13818
P52944	PDZ and LIM domain protein 1 OS=Rattus norvegicus OX=10116 GN=Pdlim1 PE=1 SV=4 - [PDLI1_RAT]	1	9	16	110	1.23777	0.808411	1.73617	0.887244	1.07457	1.02508	0.798806	1.19703	0.898001	0.698424	0.91236	1.16285	1.24047	0.917818	0.556976	0.3773	1.78335	1.00587	2.00409	1.33082	1.12827	0.54494	0.597261	1.07234	1.18526	1.2048	0.977616	1.26262	1.07152	0.902315	0.701965	1.39482	0.694435	1.38745	0.848173	0.961714	366.02	48.32	35.5618	7.23975
P02650	Apolipoprotein E OS=Rattus norvegicus OX=10116 GN=Apoe PE=1 SV=2 - [APOE_RAT]	2	12	19	150	1.57625	1.10876	0.976226	1.43994	0.517889	0.474132	0.757992	0.580791	1.59574	0.667175	1.14225	0.896909	0.785577	1.59632	0.758959	1.31164	0.752867	0.771214	0.729756	0.824396	0.883862	0.635743	0.562988	0.531144	1.21099	1.09161	2.08819	1.31552	0.753848	0.393176	0.567073	2.01976	3.45392	1.33072	1.03783	1.11311	445.437	45.83	35.7313	5.2749
B2RZ27	SH3 domain binding glutamic acid-rich protein-like 3 OS=Rattus norvegicus OX=10116 GN=Sh3bgrl3 PE=1 SV=1 - [B2RZ27_RAT]	1	2	4	16	1.55821		0.878534		0.502409		0.799642		1.59089		0.917632		1.57546		0.719448		0.423796		1.66812		0.652799		0.565224		1.1036		1.06859		1.54713		0.65954		1.12463		1.1157		70.79	50.54	10.4703	5.13525
B5DF65	Biliverdin reductase B OS=Rattus norvegicus OX=10116 GN=Blvrb PE=1 SV=1 - [B5DF65_RAT]	1	3	7	27	0.809151	0.8648	0.986803	0.972346	0.731821	1.08453	1.39272	1.00552	1.26648	0.941668	0.94375	1.33428	0.800036	0.94539	0.774031	1.07521	0.72593	0.94262	1.27083	1.14503	0.725955	1.17776	0.668874	1.28531	0.816339	0.989817	1.11618	1.01545	1.16911	0.931103	0.73692	1.01886	0.936211	1.02644	1.22419	0.843654	132.32	47.09	22.0803	6.80029
Q6P9Y4	ADP/ATP translocase 1 OS=Rattus norvegicus OX=10116 GN=Slc25a4 PE=1 SV=1 - [Q6P9Y4_RAT]	4	3	18	137	1.00093	1.44489	0.715765	1.12775	1.16472	0.991458	1.0207	0.838534	0.66144	1.2498	0.827064	0.849684	0.692751	1.19615	1.1201	0.993824	1.24928	1.09058	0.575148	0.926123	1.30177	0.925709	1.42655	1.01656	1.15893	0.818934	0.787265	0.819889	0.853688	1.11687	1.48452	0.757359	1.33172	0.861998	0.825145	1.25728	347.562	44.63	32.8832	9.74463
Q68FU3	Electron transfer flavoprotein subunit beta OS=Rattus norvegicus OX=10116 GN=Etfb PE=1 SV=3 - [ETFB_RAT]	1	6	10	48	1.06495	0.941784	0.611674	0.956639	0.826798	0.943426	1.23661	1.08022	1.00612	0.958164	1.01299	1.12021	0.682195	0.955159	1.04168	1.72945	1.2242	0.883594	0.566585	0.85932	0.817655	2.0813	1.07535	0.878795	1.23864	0.915378	1.01971	0.938407	0.971259	1.06454	0.655209	0.654922	1.18649	1.19594	1.11855	0.985503	195.055	45.88	27.6701	7.75244
P19804	Nucleoside diphosphate kinase B OS=Rattus norvegicus OX=10116 GN=Nme2 PE=1 SV=1 - [NDKB_RAT]	2	4	7	85	0.920115	1.08981	0.686537	1.09768	1.10791	0.993897	1.43829	0.858526	1.06551	1.00172	1.64193	1.73005	0.842728	1.11953	0.921843	1.28488	0.999687	0.864395	0.619601	0.709496	1.06402	1.09614	0.86146	0.734108	1.23189	1.01757	1.07417	1.00122	0.931747	1.08093	1.21399	0.832777	1.0218	0.45633	1.24172	1.1879	132.81	42.11	17.2719	7.44482
G3V9L3	Dual-specificity phosphatase 3 OS=Rattus norvegicus OX=10116 GN=Dusp3 PE=1 SV=2 - [G3V9L3_RAT]	2	5	6	26	1.26556	0.974568	1.02938	1.13615	1.22286	1.09074	1.03832	0.858941	1.06726	1.02826	1.12769	1.1045	0.907888	1.16778	0.86295	1.11027	1.06608	0.921575	1.07008	0.96318	0.972716	1.05608	0.937891	1.15949	1.19875	0.997549	1.02792	1.14266	0.865433	1.07875	1.09975	1.24704	1.23687	0.90243	0.967903	1.32444	182.725	50	21.0815	6.53662
P50137	Transketolase OS=Rattus norvegicus OX=10116 GN=Tkt PE=1 SV=1 - [TKT_RAT]	2	14	26	193	0.621921	0.98368	0.562178	0.857839	1.08114	0.926052	1.94756	0.870787	0.966236	1.45814	1.23129	1.29937	0.663377	0.879336	1.20245	1.40752	1.17305	0.822296	0.488816	0.790424	0.886278	1.39472	1.17519	0.820974	1.08777	0.917339	1.06925	0.961149	0.757628	1.26714	0.758599	0.774538	1.05422	0.8101	1.02529	1.12343	730.696	42.38	67.6006	7.48877
E9PTU4	Myosin-11 OS=Rattus norvegicus OX=10116 GN=Myh11 PE=1 SV=2 - [E9PTU4_RAT]	6	48	101	554	1.04926	1.28406	0.973448	1.44631	1.06109	1.44148	0.745405	0.883373	0.7153	2.24186	0.767728	0.773447	0.678015	1.48199	1.45583	0.373466	1.35729	1.06924	0.65638	0.786681	1.22678	0.32193	1.11729	0.568986	0.829407	0.827662	0.809155	0.671115	0.957022	0.964306	1.13299	0.615872	1.04894	1.04458	0.760004	1.40402	1919.95	39.76	227.156	5.49072
P22006	Seminal vesicle secretory protein 2 OS=Rattus norvegicus OX=10116 GN=Svs2 PE=1 SV=1 - [SVS2_RAT]	2	10	26	109	0.416272		0.409705	0.0957085	12.0904		10.5198	0.578466	0.25836		0.218004	0.184822	1.08381		0.566719	0.296156	0.714156		0.305647	0.212121	5.49471		2.5356	2.00968	0.685932		0.394445	8.99939	0.415632		0.403077	0.411668	0.240476		0.239589	0.0341197	499.94	48.07	45.5106	9.89111
D4A5L9	Uncharacterized protein OS=Rattus norvegicus OX=10116 PE=3 SV=1 - [D4A5L9_RAT]	3	5	8	40	1.04089	1.12593	1.4376	0.83134	0.919085	1.01609	1.15464	1.08391	1.56803	0.808635	0.918849	1.50111	1.14808	1.28633	0.799305	1.36655	0.868826	0.827029	0.992623	0.855158	0.89878	2.03178	0.913578	0.850762	0.843816	0.928895	0.857235	0.830551	0.898179	0.841015	0.66551	1.15601	1.06104	1.05426	0.891748	0.747346	92.4109	46.67	11.628	9.5835
Q01129	Decorin OS=Rattus norvegicus OX=10116 GN=Dcn PE=1 SV=1 - [PGS2_RAT]	1	8	20	181	0.805958	0.855868	0.829394	0.994686	0.775433	0.904	0.720893	1.19496	1.35503	0.851183	0.951899	0.999137	0.842527	1.10362	0.969151	1.63558	0.699083	0.952855	1.3158	1.0122	0.73017	1.10708	0.71613	0.685705	0.988405	0.961619	1.30623	0.951493	1.59674	0.986026	0.814672	0.770919	0.913323	0.996653	1.35537	1	495.343	39.27	39.7799	8.79248
B0BNN3	Carbonic anhydrase 1 OS=Rattus norvegicus OX=10116 GN=Ca1 PE=1 SV=1 - [CAH1_RAT]	1	7	11	97	0.709216	0.654092	0.643534	1.49263	0.611929	0.837171	1.95124	0.769816	0.988561	1.10855	1.13718	3.29607	0.659058	0.719523	0.970025	1.92453	0.778196	0.577106	1.03934	1.04698	1.36673	1.13539	0.830367	0.712591	1.05821	0.77857	1.48658	1.13073	0.858433	0.635845	0.681593	1.16453	0.765076	0.542744	1.53645	0.800834	455.513	37.93	28.2822	7.41553
Q9EQX9	Ubiquitin-conjugating enzyme E2 N OS=Rattus norvegicus OX=10116 GN=Ube2n PE=1 SV=1 - [UBE2N_RAT]	1	3	6	22	1.24679	0.758521		1.10074	0.898188	0.944758		0.902398	1.27464	0.699956		1.33319	2.014	0.915021		1.27411	0.851623	0.876024		0.953352	0.917789	0.907732		0.994579	0.953537	0.892811		1.14401	0.9649	0.82127		1.37431	1.05175	0.99101		1.04209	103.903	42.11	17.113	6.56592
F1LN88	Aldehyde dehydrogenase, mitochondrial OS=Rattus norvegicus OX=10116 GN=Aldh2 PE=1 SV=2 - [F1LN88_RAT]	8	16	26	181	0.918889	1.09333	0.67166	1.15527	1.49619	1.07846	0.966376	0.956748	0.702069	1.07311	0.955401	0.714237	0.512141	1.19404	1.28429	0.67969	1.29271	1.02091	0.821724	0.812188	1.45891	0.688617	1.35342	1.05042	0.945999	0.807543	0.908914	0.915967	0.627776	1.0012	1.28109	0.709055	1.24573	0.825239	0.87675	1.37908	675.163	47.4	56.4807	7.32764
D3ZP47	Phosphohistidine phosphatase 1 OS=Rattus norvegicus OX=10116 GN=Phpt1 PE=1 SV=1 - [D3ZP47_RAT]	1	2	4	11		0.841361	1.0503	0.981915		1.05586	1.00969	1.15753		0.704276	1.0186	1.00299		0.862382	0.702176	1.23957		0.839427	1.05539	1.12382		0.984264	0.656425	0.97662		0.935333	1.22193	1.44239		0.918076	0.94928	1.15338		0.953896	1.28917	0.989794	63.3	48.39	14.0017	5.52881
Q6P7Q4	Lactoylglutathione lyase OS=Rattus norvegicus OX=10116 GN=Glo1 PE=1 SV=3 - [LGUL_RAT]	1	4	9	46	0.98775	0.759583	1.27767	0.685457	0.812574	0.946511	1.09139	1.31855	1.45814	0.834248	0.975628	1.16348	1.28667	0.974029	0.7469	1.21696	0.668009	0.909542	1.29971	0.976356	0.693423	1.1709	0.776717	1.00151	0.796396	1.06912	1.10743	1.06047	1.04229	0.893637	0.886342	1.80893	1.03218	1.17619	1.22525	0.95181	171.422	48.37	20.8063	5.31299
P06761	Endoplasmic reticulum chaperone BiP OS=Rattus norvegicus OX=10116 GN=Hspa5 PE=1 SV=1 - [BIP_RAT]	1	12	30	209	1.20365	1.04729	0.903904	0.991666	1.0504	1.08735	0.932714	1.16261	1.34452	1.01192	0.915519	0.889545	0.965109	1.04189	0.952968	0.759149	0.974814	1.0877	1.29894	1.13523	0.95076	0.778096	0.875763	1.09756	0.898791	1.01487	1.14175	1.15724	1.29403	1.03473	0.935859	0.780154	1.06802	0.989613	1.02404	0.905779	680.983	46.02	72.3024	5.16064
O55004	Ribonuclease 4 OS=Rattus norvegicus OX=10116 GN=Rnase4 PE=1 SV=1 - [RNAS4_RAT]	1	4	8	43	1.81755	0.718748	1.43901	0.600975	0.914932	1.24631	0.864643	1.00762	1.01993	1.18477	1.05393	0.671336	1.69921	1.22144	0.840791	1.6156	1.45797	1.10769	1.37672	1.17636	1.52311	0.844429	1.06921	0.787712	1.38075	1.03366	1.20798	1.15587	1.20665	0.6518	0.936443	0.818208	1.18735	1.20559	1.34009	0.955133	131.24	48.3	16.8923	8.51416
P62260	14-3-3 protein epsilon OS=Rattus norvegicus OX=10116 GN=Ywhae PE=1 SV=1 - [1433E_RAT]	1	2	11	52		1.06073		0.96446		1.03212		0.597277		0.895128		0.715873		0.935976		1.02937		0.912986		0.500935		1.13465		0.739703		1.10202		0.899339		1.07414		0.89013		0.976781		1.27766	200.367	42.75	29.1554	4.7417
D3ZVR9	Phosphoglucomutase 5 OS=Rattus norvegicus OX=10116 GN=Pgm5 PE=1 SV=3 - [D3ZVR9_RAT]	1	19	30	363	0.859038	1.33197	0.711729	0.965409	1.18631	1.12196	0.919857	0.649668	0.658123	1.43627	0.98145	0.784828	0.801852	1.12101	0.99971	0.801975	1.13251	1.04038	0.663059	0.873306	1.57643	0.812724	1.51854	0.992119	1.18064	0.998405	0.747102	0.873584	0.70584	1.22793	1.37414	0.745999	1.01161	0.80571	0.837005	1.27091	1270.05	46.03	62.1648	7.82568
G3V624	Coronin OS=Rattus norvegicus OX=10116 GN=Coro1c PE=1 SV=1 - [G3V624_RAT]	1	8	20	118	0.828152	1.30832	0.753484	1.04866	1.2	1.20092	0.844287	0.762627	0.66164	1.53636	0.945664	0.689117	0.800359	1.26047	0.987664	0.386233	1.31567	1.37799	0.619146	0.856446	1.42048	0.521864	1.13735	0.890308	0.997112	0.951051	0.800613	0.770074	0.760272	1.4152	1.39491	0.53793	0.961576	1.00368	0.76769	1.61288	369.913	38.61	53.144	7.07861
P63018	Heat shock cognate 71 kDa protein OS=Rattus norvegicus OX=10116 GN=Hspa8 PE=1 SV=1 - [HSP7C_RAT]	6	14	30	284	0.893876	1.13368	0.799927	0.991246	1.08887	1.05552	1.0453	0.919982	0.933631	1.13517	0.93139	0.726189	0.793239	1.04817	0.928261	0.641903	1.10619	1.13265	0.961654	0.998556	1.07742	0.748917	1.1278	1.05393	1.05949	0.98963	1.04635	0.982789	1.1578	1.13312	1.19613	0.652396	0.961227	0.955188	0.879162	1.03786	1166.45	45.67	70.8272	5.51611
P84817	Mitochondrial fission 1 protein OS=Rattus norvegicus OX=10116 GN=Fis1 PE=1 SV=1 - [FIS1_RAT]	1	3	5	22	1.21889	0.753312	1.44974	0.906169	1.12733	1.17576	0.90438	1.25618	1.25976	0.747501	0.810745	0.741852	1.66546	0.932838	0.822514	1.33148	0.822105	1.11392	1.5701	1.24112	0.897278	1.32722	0.806442	1.36845	0.697267	0.809315	0.879685	0.933116	0.932875	0.931631	1.00323	2.19428	1.08857	1.54839	0.894624	0.859727	100.773	39.47	16.984	8.52881
Q9R1T1	Barrier-to-autointegration factor OS=Rattus norvegicus OX=10116 GN=Banf1 PE=1 SV=1 - [BAF_RAT]	1	2	4	36	1.31874	0.653132	1.87935	0.842112	0.944693	0.991779	0.688001	1.34134	0.970153	0.677863	1.05284	1.26187	2.06768	0.885418	0.513032	1.02041	1.27095	0.986079	1.87042	1.29455	0.914423	1.20932	0.42946	0.963243	0.876402	0.988658	1.01715	0.906241	1.15517	0.822857	0.826235	2.09624	0.796857	1.81455	1.00426	0.848057	134.058	47.19	10.038	6.0874
Q5M7T5	Serine (Or cysteine) peptidase inhibitor, clade C (Antithrombin), member 1 OS=Rattus norvegicus OX=10116 GN=Serpinc1 PE=1 SV=1 - [Q5M7T5_RAT]	2	8	14	86			0.572305				0.876651	0.976754			0.949103				1.56254	1.42802			0.983901				0.927436	0.566738			1.34629				0.714921				1.14692	0.635362	165.583	42.37	52.2008	6.56592
D3ZSL2	ABRA C-terminal-like OS=Rattus norvegicus OX=10116 GN=Abracl PE=1 SV=1 - [D3ZSL2_RAT]	1	2	3	10	0.870166				1.29519				1.51871				0.994297				0.82078				0.634268				1.03777				1.11561				1.1168				68.8867	46.91	9.02481	5.79541
F1LNF1	Heterogeneous nuclear ribonucleoproteins A2/B1 OS=Rattus norvegicus OX=10116 GN=Hnrnpa2b1 PE=1 SV=1 - [F1LNF1_RAT]	3	6	14	95	0.787979	0.945021	0.942192	1.01832	1.09817	1.16228	0.971521	1.1929	1.33123	0.870999	0.982386	1.17024	0.783182	0.954374	0.858599	0.743782	1	1.00153	1.28	1.09518	0.967191	0.781978	0.803705	0.968945	1.06143	1.05137	1.22639	1.14089	1.19908	1.02241	0.999552	0.780268	0.893671	0.995535	1.21239	0.940051	333.48	44.32	37.2747	9.0708
Q6NYB7	Ras-related protein Rab-1A OS=Rattus norvegicus OX=10116 GN=Rab1A PE=1 SV=3 - [RAB1A_RAT]	33	2	8	31	0.406519	1.27346		1.10445	0.805113	1.0201		0.842254	0.832008	1.32123		0.877067	0.392742	1.21179		1.76685	0.931052	0.819974		0.729124	0.690826	1.01633		0.837529	1.73559	0.859616		1.03282	0.784049	0.910466		0.626627	1.20496	0.647784		1.5356	140.28	43.41	22.6634	6.21436
P51886	Lumican OS=Rattus norvegicus OX=10116 GN=Lum PE=1 SV=1 - [LUM_RAT]	1	13	17	297	1.10265	0.831604	1.28872	0.888203	0.710531	0.840085	0.76452	1.35339	1.47786	0.736203	0.950374	1.3743	1.37408	1.01877	0.721008	1.50795	0.596906	0.887152	1.34167	1.07987	0.686776	1.37517	0.567326	0.814586	1.06789	0.997835	1.12786	1.06404	1.58017	0.883369	0.825458	1.47038	0.865491	1.29965	1.18457	0.89901	997.279	44.38	38.2546	6.43018
F1M9B2	Insulin-like growth factor binding protein 7, isoform CRA_b OS=Rattus norvegicus OX=10116 GN=Igfbp7 PE=1 SV=2 - [F1M9B2_RAT]	1	8	11	138	1.20364	0.774557	2.69006	0.846434	0.732739	0.823708	0.869941	1.09804	1.25182	0.590145	1.08081	1.58193	2.49327	0.822426	0.485345	0.844033	0.699278	1.07617	2.52219	1.13636	0.675871	0.806723	0.519631	1.19597	1.07118	1.46441	1.0698	1.35761	1.10647	0.576957	0.694226	2.25046	0.767096	0.756184	0.705903	0.844573	500.107	46.62	28.9305	8.11865
P31399	ATP synthase subunit d, mitochondrial OS=Rattus norvegicus OX=10116 GN=Atp5pd PE=1 SV=3 - [ATP5H_RAT]	1	2	7	60	1.11996	0.898398	2.01189		0.728444	0.912947	0.757677		1.43511	0.60467	0.828176		1.96908	0.815758	0.583274		0.649444	0.981399	1.86894		0.707543	0.71167	0.554477		0.625072	1.10488	1.04395		1.54643	0.831193	0.787976		0.720108	1.22309	1.00527		71.7021	38.51	18.7516	6.59521
Q62930	Complement component C9 OS=Rattus norvegicus OX=10116 GN=C9 PE=1 SV=1 - [CO9_RAT]	2	14	23	130	1.51414	0.943107	0.8511	1.59847	0.244887	0.54772	0.453672	0.748628	1.3516	0.409198	1.2054	0.41222	0.621215	1.23181	1.37433	1.83266	0.808898	0.978252	0.632873	0.962964	0.922884	1.46964	1.23495	0.677729	1.49223	1.53352	1.63476	1.06946	0.447063	0.983488	0.456293	0.982917	1.83059	1.15086	1.06488	1.03522	394.178	41.88	62.2406	5.69385
Q9EQP5	Prolargin OS=Rattus norvegicus OX=10116 GN=Prelp PE=2 SV=1 - [PRELP_RAT]	1	18	21	465	0.855871	0.896247	1.46692	0.958738	0.831762	0.86034	0.919712	1.17256	1.22979	0.823251	1.01376	1.61874	0.82806	0.985469	0.850098	1.06639	0.737491	0.809474	1.1962	1.05111	0.8016	1.05534	0.645959	0.897444	0.999285	1.14066	1.1056	0.948154	1.13677	0.852599	0.910416	1.93647	0.808689	1.23164	1.29857	1.04352	907.056	44.03	43.1519	9.45166
P13832	Myosin regulatory light chain RLC-A OS=Rattus norvegicus OX=10116 GN=Rlc-a PE=2 SV=2 - [MRLCA_RAT]	3	2	6	55	1.20692	0.941806	1.53664	0.846181	0.729088	1.17321	0.778773	1.36734	1.53155	1.02953	0.799728	1.28284	1.66457	0.976462	0.86806	0.693839	0.789684	0.885743	1.543	1.16876	0.824805	1.05811	0.553259	0.740226	0.724768	0.982427	0.987256	0.93446	1.61683	0.836143	0.737466	1.56657	0.66219	1.6742	0.987447	0.885197	275.434	45.93	19.8825	4.80518
B0BMS8	Myl9 protein OS=Rattus norvegicus OX=10116 GN=Myl9 PE=1 SV=1 - [B0BMS8_RAT]	2	3	6	68	1.41899	1.00599	2.22516	0.846491	0.670403	1.2288	0.792653	1.43097	1.114	0.84774	0.729295	0.949135	1.86629	0.928513	0.780994	0.624545	0.801706	1.18424	1.52018	1.1659	0.961513	0.822389	0.634319	0.786768	0.811977	0.965687	1.2477	1.03014	1.47536	0.881028	1.01805	1.22823	0.729128	1.41924	0.924955	0.889023	325.534	45.93	19.8415	4.91943
G3V8L9	Caveolae-associated protein 1 OS=Rattus norvegicus OX=10116 GN=Cavin1 PE=1 SV=1 - [G3V8L9_RAT]	2	9	16	140	0.89067	1.21455	1.25808	0.759497	0.843368	1.05281	1.06665	1.30256	0.973532	1.02553	0.969482	0.652256	0.805633	0.757415	0.736568	0.326993	1.23188	1.34947	1.45169	1.32463	1.41778	0.333539	1.03704	1.11275	0.604642	1.05323	1.02918	1.23697	1.60642	1.3814	1.38445	0.50525	0.609049	0.962307	0.761483	0.796172	509.42	45.92	43.882	5.51611
G3V7Y3	ATP synthase subunit delta, mitochondrial OS=Rattus norvegicus OX=10116 GN=Atp5f1d PE=1 SV=1 - [G3V7Y3_RAT]	2	2	5	28	1.09889	0.797815	1.51923	0.899351	0.839251	1.04905	0.828515	1.42463	1.49534	0.649543	0.801859	1.01045	1.29658	0.919197	0.569147	0.819258	0.682537	1.01019	1.82589	1.23066	0.761055	0.952083	0.531038	1.0357	0.66954	0.89546	0.99166	1.04439	1.41732	0.867036	0.776528	1.37253	0.802512	1.29184	1.06305	0.982972	212.504	42.26	17.5522	5.23682
P85973	Purine nucleoside phosphorylase OS=Rattus norvegicus OX=10116 GN=Pnp PE=1 SV=1 - [PNPH_RAT]	1	8	9	97	0.631627	1.23787	0.60506	1.12134	1.24097	1.17725	0.818878	0.695294	1.02082	1.04003	1.01013	0.836486	0.487995	1.4768	1.0598	1.45011	1.15503	0.994548	0.575316	0.680396	1.19886	1.34002	1.11245	0.811889	1.29071	0.99775	0.873215	0.880791	0.497202	1.10905	0.964141	0.640619	1.36492	0.841952	1.03486	1.37072	296.879	45.67	32.281	6.93213
Q8CFN2	Cell division control protein 42 homolog OS=Rattus norvegicus OX=10116 GN=Cdc42 PE=1 SV=2 - [CDC42_RAT]	8	4	9	64	0.905844	1.04598	0.860188	1.0099	1.26966	1.11188	0.927252	0.817427	0.858251	1.06352	1.04382	0.85327	0.936685	1.15766	1.28143	1.16152	0.962879	1.04724	0.74909	0.817162	0.893141	1.24826	1.16395	0.912021	1.07841	0.95032	0.859288	0.874197	0.847738	1.04771	1.18606	0.908149	1.24886	0.888611	1.00096	1.06589	306.447	45.03	21.245	6.55127
Q6P6V0	Glucose-6-phosphate isomerase OS=Rattus norvegicus OX=10116 GN=Gpi PE=1 SV=1 - [G6PI_RAT]	1	4	18	128	1.64025	1.05433	0.907461	0.66651	0.915894	1.10301	1.21357	0.959115	0.87568	1.2331	0.969619	1.04015	1.29716	1.1254	1.24266	1.01557	0.793274	0.997511	0.889401	0.726982	0.700691	1.25391	1.39846	1.12518	1.48346	0.981143	1.06696	0.899211	0.851969	0.834117	0.82643	1.10632	1.60971	1.07128	0.747863	0.828404	512.367	37.99	62.7871	7.76709
P27605	Hypoxanthine-guanine phosphoribosyltransferase OS=Rattus norvegicus OX=10116 GN=Hprt1 PE=1 SV=1 - [HPRT_RAT]	2	5	8	18	0.58817	1.09809	0.907927	1.02505	1.23491	1.05608	0.911272	0.859747	1.04054	1.0088	1.01605	0.964468	0.4605	1.11287	1.05921	0.962906	1.00908	0.95315	0.954251	0.771724	0.959182	1.02342	1.10718	0.788484	0.83859	0.953314	0.952487	0.802611	0.776764	1.03156	1.10292	0.773931	1.15144	0.852174	1.03129	1.05805	101.895	45.41	24.4615	6.53662
P56574	Isocitrate dehydrogenase [NADP], mitochondrial OS=Rattus norvegicus OX=10116 GN=Idh2 PE=1 SV=2 - [IDHP_RAT]	2	13	22	159	0.743571	0.951087	0.844139	1.17455	1.3871	1.17464	1.03142	0.920485	0.785483	1.0935	0.826821	0.883544	0.741482	1.12623	1.16139	0.681263	1.1509	1.04776	0.812946	0.795394	1.04191	0.7625	1.31442	1.02285	1.07481	0.880745	0.821711	0.902035	0.640085	0.991128	1.20312	0.724373	1.23808	0.89098	0.835949	1.23958	480.293	44.25	50.9349	8.68994
F1LP21	Translocase of inner mitochondrial membrane 8A1 OS=Rattus norvegicus OX=10116 GN=Timm8a1 PE=1 SV=3 - [F1LP21_RAT]	2	1	3	8			1.94217	0.827046			0.793215	1.32972			0.71761	1.42473			0.715427	0.778693			1.65184	1.15044			0.564804	1.03621			0.905511	0.999047			0.569222	2.09473			0.770641	0.713786	39.0733	45.26	10.8812	5.16064
M0R757	Elongation factor 1-alpha OS=Rattus norvegicus OX=10116 GN=LOC100360413 PE=3 SV=1 - [M0R757_RAT]	4	10	20	118	0.557504	1.31626	0.779889	1.16256	1.19197	1.06245	1.01123	0.739476	0.873453	1.13694	0.998264	0.919503	0.649402	1.15885	1.22811	1.00266	1.03165	0.970234	0.62406	0.86514	1.12098	1.12104	1.58993	0.991352	1.20133	1.02469	0.976325	0.939222	0.799969	1.25595	0.968133	0.609346	1.0483	0.835834	0.936456	1.21043	343.513	42.86	50.0761	9.01221
Q64428	Trifunctional enzyme subunit alpha, mitochondrial OS=Rattus norvegicus OX=10116 GN=Hadha PE=1 SV=2 - [ECHA_RAT]	1	12	24	107	1.18083	1.15465	0.773492	0.895047	1.00718	0.867199	1.26149	1.06375	0.917775	1.03421	0.771365	0.958126	0.859983	1.00069	1.33737	0.913076	1.38234	1.01229	0.801125	0.989459	1.04903	1.41391	1.36442	1.1965	1.06261	0.942134	0.944096	0.922035	0.797809	1.07328	1.01928	0.858346	1.04638	1.174	0.908106	1.013	402.032	38.79	82.6125	9.05615
A0A096MKE2	Sorting nexin 12 OS=Rattus norvegicus OX=10116 GN=Snx12 PE=1 SV=1 - [A0A096MKE2_RAT]	3	3	4	21	1.10583	0.935512	1.26644	0.964644	1.07119	1.17265	1.04195	0.932767	1.51318	0.835293	1.24578	1.14193	1.21381	1.13876	0.730181	1.15439	0.889528	0.92034	1.50265	0.803624	0.823467	1.23796	0.835461	0.975068	0.877629	1.36192	0.785641	1.01722	1.16844	0.943789	0.771545	1.14873	1.0172	1.11193	0.978565	0.856105	90.09	45.06	18.8727	8.44092
D3Z8L7	Ras-related protein R-Ras OS=Rattus norvegicus OX=10116 GN=Rras PE=1 SV=1 - [RRAS_RAT]	1	2	8	23			0.840905	1.03754			1.26034	0.881185			1.09814	1.30959			1.02995	1.51369			1.0002	0.782256			1.14529	0.95304			1.06017	0.781582			0.984356	0.968661			0.879079	1.18956	90.98	44.04	23.8942	7.34229
P15429	Beta-enolase OS=Rattus norvegicus OX=10116 GN=Eno3 PE=1 SV=3 - [ENOB_RAT]	2	3	15	155	0.74464	0.578913	1.13698	1.42491	0.296566	1.04149	2.16299	1.14702	0.736805	0.692149	0.882231	1.73329	0.513702	0.672995	1.35424	1.75649	0.33195	1.03953	0.669779	0.936729	0.316448	0.807557	0.936569	1.19169	0.90651	0.615421	1.84397	1.6149	0.776493	0.500621	0.818454	0.988514	1.19281	1.20507	1.22993	1.09434	688.112	37.33	46.9843	7.44482
P23965	Enoyl-CoA delta isomerase 1, mitochondrial OS=Rattus norvegicus OX=10116 GN=Eci1 PE=1 SV=1 - [ECI1_RAT]	3	6	10	58	0.909068	1.10315	0.763291	1.1072	1.14711	0.998076	0.967251	1.31275	1.07111	1.01485	0.900103	1.01378	0.848405	1.00692	1.08483	1.42102	1.47073	1.05983	0.699796	1.08023	0.94961	1.52761	1.01041	0.960397	1.11553	0.94699	0.803961	1.03379	0.946383	1.13614	0.769404	0.871212	1.23187	1.21915	0.941118	0.968708	224.593	41.87	32.234	9.53955
P17764	Acetyl-CoA acetyltransferase, mitochondrial OS=Rattus norvegicus OX=10116 GN=Acat1 PE=1 SV=1 - [THIL_RAT]	1	5	13	74	1.05206	1.11061	0.729271	0.87955	0.896266	0.958851	1.1718	1.06275	0.968164	1.14691	0.912293	1.2985	0.73907	1.13579	1.32308	1.48277	0.928163	0.785395	0.705956	1.02713	0.840632	1.67003	1.13901	1.10953	1.16145	0.778107	0.94452	0.789769	0.928675	0.90964	0.900474	0.876444	1.1761	0.999583	1.13236	1.0602	266.48	39.39	44.6664	8.76318
Q62658	Peptidyl-prolyl cis-trans isomerase FKBP1A OS=Rattus norvegicus OX=10116 GN=Fkbp1a PE=1 SV=3 - [FKB1A_RAT]	1	3	6	22	0.921631	0.579824	1.82396	0.817683	0.752334	1.08033	0.915435	1.21854	1.89277	0.439043	0.947209	1.18881	2.34077	0.847837	0.540218	1.06319	0.488774	0.808931	1.61924	1.1434	0.500284	1.10181	0.52555	1.11653	0.628292	1.08652	1.10857	1.0871	1.41357	0.723843	0.665076	1.96005	0.779265	1.13875	0.991805	0.720714	202.75	44.44	11.9151	8.1626
P01048	T-kininogen 1 OS=Rattus norvegicus OX=10116 GN=Map1 PE=1 SV=2 - [KNT1_RAT]	1	6	22	275	1.25969	1.13799	0.595306	0.755042	0.389494	1.00152	0.31255	0.473438	2.01898	0.601114	0.824806	0.649369	1.45372	1.24221	0.319634	0.669773	0.891112	1.35663	0.78147	0.919493	0.875364	1.92462	0.399882	0.458591	1.18199	2.19502	1.08422	0.768309	0.786863	0.936088	0.23236	1.44138	1.08262	1.83584	0.95891	0.56274	1476.77	43.72	47.7446	6.52197
D4A4D5	Similar to 60S acidic ribosomal protein P2 OS=Rattus norvegicus OX=10116 GN=LOC498555 PE=3 SV=1 - [D4A4D5_RAT]	3	3	4	24		0.908566	2.68932	0.874732		0.906685	0.986965	1.54261		0.644617	1.12448	1.41622		0.778032	0.41204	0.579918		1.00636	1.77103	1.49105		0.663052	0.558031	1.18205		1.22968	1.34583	1.33921		0.975182	0.985404	1.43628		1.54509	1.022	0.716818	150.024	40.87	11.6989	4.53857
A0A0G2JTV2	Non-muscle caldesmon OS=Rattus norvegicus OX=10116 GN=Cald1 PE=1 SV=1 - [A0A0G2JTV2_RAT]	3	18	37	331	1.01187	1.0048	1.94455	0.96329	0.855667	1.0759	0.924958	1.23952	1.52821	0.687883	1.16915	0.971956	1.46678	0.829478	0.536374	0.297472	0.813071	1.04571	1.76488	1.20752	0.933305	0.38017	0.659699	1.13299	0.676846	1.16102	1.19378	1.179	1.39823	0.902016	1.07418	0.747042	0.75673	1.06751	1.05488	0.947874	663.57	42.92	72.2397	6.7124
Q6RUV5	Ras-related C3 botulinum toxin substrate 1 OS=Rattus norvegicus OX=10116 GN=Rac1 PE=1 SV=1 - [RAC1_RAT]	10	4	9	77	0.961285	1.02001	0.95861	0.983596	1.28839	1.09277	0.927105	0.812494	0.930118	1.18998	1.01243	0.966892	0.963061	1.13491	1.12158	1.18943	1.02425	1.00486	0.88587	0.852039	0.956931	1.26881	1.17062	1.03821	1.09584	0.913622	0.835589	0.888738	0.90048	0.975501	1.15024	1.05949	1.4097	1.00043	0.960688	1.11827	404.381	43.75	21.4362	8.49951
P07895	Superoxide dismutase [Mn], mitochondrial OS=Rattus norvegicus OX=10116 GN=Sod2 PE=1 SV=2 - [SODM_RAT]	1	2	6	23	1.47877	1.14449	0.956313		1.19095	1.15536	0.849996		1.43377	0.951774	0.900513		0.955074	1.15424	0.855543		1.09893	1.17128	0.997424		0.928492	1.34248	0.854001		1.16435	0.979947	0.880287		1.29522	1.08694	1.00399		1.2919	1.21142	0.898017		68.8	40.54	24.6586	8.80713
Q08163	Adenylyl cyclase-associated protein 1 OS=Rattus norvegicus OX=10116 GN=Cap1 PE=1 SV=3 - [CAP1_RAT]	1	10	20	112	0.674168	1.37663	0.731941	1.06706	1.23389	1.08047	0.93383	0.803287	0.816597	1.39746	1.12239	0.845314	0.825618	1.08791	1.07682	0.564473	1.27086	1.27308	0.540675	0.816921	1.23864	0.630893	1.4214	0.957174	0.862661	1.0277	0.880445	0.86905	0.704855	1.46266	1.54689	0.768099	0.988159	0.968049	0.959549	1.31412	499.743	37.13	51.5565	7.51807
P04905	Glutathione S-transferase Mu 1 OS=Rattus norvegicus OX=10116 GN=Gstm1 PE=1 SV=2 - [GSTM1_RAT]	2	4	11	92	0.729067		1.02742	1.7001	0.862078		0.833285	1.04725	0.884483		0.795614	0.790578	0.727792		1.25726	2.3436	0.939906		1.00731	1.03597	0.625709		1.1869	1.35308	0.937415		0.74753	0.78235	0.657197		0.682364	1.15152	0.922379		1.24151	1.09023	337.471	34.4	25.8971	8.19189
Q9JLJ3	4-trimethylaminobutyraldehyde dehydrogenase OS=Rattus norvegicus OX=10116 GN=Aldh9a1 PE=1 SV=1 - [AL9A1_RAT]	2	7	15	54	0.78281	1.11966	0.683907	1.23958	1.41809	1.1264	1.06965	0.854151	0.913705	1.13061	1.09055	1.03041	0.816466	1.28692	1.2074	1.12156	1.07252	1.00078	0.613942	0.883227	1.03562	1.00379	1.19939	0.962615	1.03875	0.918905	0.855698	0.854805	0.673666	1.11816	1.04768	0.755619	1.26251	0.935379	1.03467	1.18876	248.352	32.19	53.618	6.91748
P20760	Ig gamma-2A chain C region OS=Rattus norvegicus OX=10116 GN=Igg-2a PE=1 SV=1 - [IGG2A_RAT]	1	6	12	135	0.77783	0.679631	0.503414	1.68274	0.962998	0.874191	0.621794	0.601927	1.83334	0.966517	0.760679	0.987626	0.742457	0.779506	0.970487	0.533357	1.62446	1.0713	0.575015	0.905595	1.09747	2.13119	0.454231	0.628634	1.06909	1.24007	0.889527	0.745695	1.37727	1.1183	0.584856	0.631232	2.16379	0.966562	0.652352	0.877733	606.575	36.96	35.1634	7.6792
P47853	Biglycan OS=Rattus norvegicus OX=10116 GN=Bgn PE=1 SV=1 - [PGS1_RAT]	1	11	21	197	0.97774	0.768934	0.81184	1.02707	0.83784	1.23363	0.690053	0.974163	1.04263	1.17791	0.929214	0.955297	0.606766	1.32576	1.05838	1.16683	0.709208	0.922978	1.12724	1.0912	0.732325	1.59186	0.770316	0.861367	1.09965	0.800878	1.06569	0.851297	1.37829	0.994426	0.90645	0.744652	1.08425	0.765019	1.33317	1.13523	808.46	39.84	41.6797	7.51807
Q09073	ADP/ATP translocase 2 OS=Rattus norvegicus OX=10116 GN=Slc25a5 PE=1 SV=3 - [ADT2_RAT]	3	6	18	154	0.898883	1.10046	0.746424	1.1165	1.08031	0.960602	1.04072	0.795185	0.717747	1.05879	0.854708	0.949584	0.819265	1.12143	1.24738	1.14291	1.20343	0.918671	0.773986	0.906883	1.29251	1.17995	1.22445	0.985712	0.994015	0.830688	0.80874	0.840541	0.770813	1.06865	1.11414	0.698133	1.06747	0.777513	0.786411	1.18102	404.649	42.28	32.8801	9.72998
P0DMW0	Heat shock 70 kDa protein 1A OS=Rattus norvegicus OX=10116 GN=Hspa1a PE=2 SV=1 - [HS71A_RAT]	2	8	25	155	0.971396	1.03504	1.07366	1.18227	1.15253	0.989662	1.04441	1.24318	0.601757	0.873624	0.926341	0.655442	0.673572	0.808345	1.063	0.655267	1.5817	1.00873	0.998358	1.05368	1.349	0.579173	1.22921	1.3434	0.833215	0.702067	0.990655	0.989323	0.860839	1.21697	1.53382	0.819423	0.881468	0.741943	0.755095	1.69692	505.625	37.75	70.1421	5.8208
A0A0H2UHI5	Ab1-233 OS=Rattus norvegicus OX=10116 GN=Serpina3n PE=1 SV=1 - [A0A0H2UHI5_RAT]	5	6	15	116	1.04158	0.85408	0.626564	1.52073	0.228802	0.484416	0.576827	0.64003	1.54718	0.380567	1.59466	0.865926	0.24883	1.28113	1.21889	2.00483	0.872002	0.783843	0.496538	0.916934	0.943979	1.58295	1.19223	0.616201	1.77731	1.42228	1.67968	1.30994	0.246126	1.06351	0.533619	0.822568	1.34337	0.86523	1.4479	1.37012	510.994	42.89	45.4526	5.46533
D4A6G6	Ribosomal protein S19-like OS=Rattus norvegicus OX=10116 GN=LOC100362339 PE=4 SV=1 - [D4A6G6_RAT]	8	3	7	25	0.726868	0.962829	1.50487	1.02263	1.2204	0.977841	1.08869	0.866546	1.25364	0.985388	1.29943	1.34756	0.787613	0.791548	1.0215	0.743884	0.844787	0.863971	0.941717	0.834807	0.916206	0.921486	1.22006	1.12298	0.954382	1.02338	1.05802	0.822994	0.689782	0.998175	1.48632	1.28152	1.30504	0.94314	1.12063	0.918134	88.845	35.86	16.1076	10.4038
P04897	Guanine nucleotide-binding protein G(i) subunit alpha-2 OS=Rattus norvegicus OX=10116 GN=Gnai2 PE=1 SV=3 - [GNAI2_RAT]	13	5	11	61	1.04088	0.930078	1.06592	1.25947	1.44539	0.987576	0.937634	0.952446	0.842732	1.03752	1.05838	0.901453	1.21401	1.11522	1.32094	1.17326	1.27815	1.00136	0.930086	0.765414	1.19855	1	1.2845	1.02773	1.00227	0.962969	0.844203	0.876463	0.759583	0.956664	1.09978	0.865001	1.34087	0.845536	0.846779	1.17954	290.182	38.87	40.4731	5.45264
F1LPK7	Plastin 3 (T-isoform), isoform CRA_a OS=Rattus norvegicus OX=10116 GN=Pls3 PE=1 SV=2 - [F1LPK7_RAT]	5	11	20	109	0.847478	1.31485	1.05289	1.0308	1.15374	1.16349	1.06648	0.798039	0.805851	1.43349	1.10842	0.949763	0.858518	1.07041	1.23127	0.816228	1.09548	0.901315	0.837407	0.795914	0.977112	0.885614	1.43138	1.14392	1.16442	1.06483	0.90495	0.949967	0.587044	1.14783	0.980913	1.0053	1.09632	0.881647	0.955836	1.05102	337.351	33.97	70.7042	5.5415
Q9QZQ5	Protein NOV homolog OS=Rattus norvegicus OX=10116 GN=Nov PE=1 SV=1 - [NOV_RAT]	1	8	11	151	1.04137	0.812087	2.62756	0.928361	0.62045	0.688677	0.724817	1.0633	1.24327	0.567662	0.921133	1.33917	2.49876	0.903734	0.61574	0.935682	0.658089	0.770733	2.20758	1.25533	0.620028	1.07253	0.684898	1.17694	0.968609	1.22329	1.18819	1.03745	0.813858	0.70832	0.768512	2.84692	0.725208	1.45048	0.928867	1.00403	475.625	42.45	38.4831	7.63525
F1M983	Complement factor H OS=Rattus norvegicus OX=10116 GN=Cfh PE=1 SV=1 - [F1M983_RAT]	5	20	41	246	1.44618	0.791821	1.89399	1.05251	0.356408	0.703996	0.686651	0.973162	1.64633	0.522705	1.14978	0.998636	1.74668	0.764018	0.523653	0.681548	0.677757	1.12552	1.53096	1.43878	0.725071	0.634178	0.551995	1.01101	0.963314	1.54562	1.66175	1.45834	0.815431	0.701571	0.528771	1.60993	1.38528	1.24324	0.949037	0.875633	707.171	36.71	139.916	6.87354
P05197	Elongation factor 2 OS=Rattus norvegicus OX=10116 GN=Eef2 PE=1 SV=4 - [EF2_RAT]	1	15	28	189	1.21986	1.00243	0.898887	1.09447	1.13776	1.02532	1.10651	0.838816	0.82271	1.21243	1.11961	0.83299	0.916636	1.01957	1.28023	0.865039	1.1374	1.03904	0.809309	0.903366	1.06068	0.76919	1.40784	1.29708	0.930918	0.940551	0.922784	1.01466	0.746678	0.963854	1.15625	0.881338	1.19259	0.835904	0.803008	1.04263	632.625	32.98	95.2229	6.82959
G3V8D4	Apolipoprotein C-II (Predicted) OS=Rattus norvegicus OX=10116 GN=Apoc2 PE=1 SV=1 - [G3V8D4_RAT]	1	2	3	14	1.50762	0.814519	0.869897	0.821612	0.419268	1.22844	1.60488	0.784184	2.63307	0.649917	0.669607	2.13254	1.79452	0.91568	0.487245	0.941437	0.654203	0.818583	1.29396	1.08173	0.704865	1.20225	0.459727	0.6117	0.77164	1.99492	1.16329	1.67739	1.13199	0.736284	0.584282	1.24516	0.919192	1.24831	1.26893	0.521321	69.7533	32.99	10.6883	4.61475
D4A8F2	Ras suppressor protein 1 OS=Rattus norvegicus OX=10116 GN=Rsu1 PE=1 SV=3 - [D4A8F2_RAT]	1	8	12	104	1.16285	1.08246	1.19235	0.87548	1.02158	1.08575	0.932123	1.16415	0.921717	1.06241	0.957965	0.918443	1.1861	1.03915	0.938317	1.58208	1.02804	1.14223	1.24334	0.999495	0.98889	1.10482	1.04644	1.14876	0.819189	0.995471	0.948899	0.994123	0.9495	1.05787	1.14219	2.00883	0.913454	1.18252	1.02714	0.973943	306.518	41.88	31.3176	7.95752
G3V6S1	PRKC apoptosis WT1 regulator protein OS=Rattus norvegicus OX=10116 GN=Pawr PE=1 SV=1 - [G3V6S1_RAT]	2	2	6	22	0.929495	1.00058	2.89561	0.75403	0.729746	0.850638	1.09381	1.38064	1.55568	0.659774	1.0551	1.16341	2.85623	0.753412	0.459498	0.352425	0.640574	1.02644	2.33224	1.29366	0.660112	0.39539	0.516408	1.37783	0.51894	1.55267	1.02822	1.12184	1.38391	0.71079	0.930497	1.82009	0.550307	1.31356	0.931703	0.672558	93.24	41.87	35.8318	5.74463
O88989	Malate dehydrogenase, cytoplasmic OS=Rattus norvegicus OX=10116 GN=Mdh1 PE=1 SV=3 - [MDHC_RAT]	1	9	13	108	0.71355	1.06531	0.714963	0.994821	1.38478	1.19958	1.14718	0.766347	0.982613	1.07859	0.990626	1.05421	0.656253	1.00952	1.1397	1.12051	1.12178	0.954713	0.70787	0.763349	0.944146	1.16947	1.13592	0.776641	1.14198	0.906683	0.939666	0.870466	0.750673	1.11573	0.918465	0.733846	1.19867	0.763739	1.14197	1.08186	246.77	41.62	36.46	6.58057
G3V7K3	Ceruloplasmin OS=Rattus norvegicus OX=10116 GN=Cp PE=1 SV=1 - [G3V7K3_RAT]	3	22	39	282	1.4024	1.10927	0.495941	1.22417	0.440367	0.916401	0.488912	0.537511	1.39063	0.712799	1.03882	0.477694	0.639095	1.35919	1.2303	1.49585	1.0381	1.27995	0.492077	0.87614	1.09723	1.87273	0.994991	0.663728	1.55108	1.67797	1.06346	0.885609	0.524557	1.01619	0.448862	0.71585	2.13412	1.07573	1.05816	0.795336	996.586	34.56	120.589	5.64307
P56571	ES1 protein homolog, mitochondrial OS=Rattus norvegicus OX=10116 PE=1 SV=2 - [ES1_RAT]	1	4	9	74	1.17634	0.937884	0.89427	1.06622	1.00455	1.03967	1.03119	1.10979	1.16596	0.890343	0.923257	1.08271	1.0303	0.973756	0.974297	1.05049	1.00645	0.995419	1.23158	0.980987	0.913953	1.16613	0.899011	0.966031	1.12285	0.90702	1.01421	1.00644	1.12972	0.961696	0.973671	0.958311	1.09512	0.973342	1.1009	1.16313	286.262	40.23	28.1549	8.92432
A0A0G2JSS8	Peroxiredoxin 5, isoform CRA_c OS=Rattus norvegicus OX=10116 GN=Prdx5 PE=1 SV=1 - [A0A0G2JSS8_RAT]	2	5	9	56	0.944009	0.816963	0.992085	0.926157	1.79821	1.03686	1.1557	1.1381	1.13591	0.985171	1.11594	1.1491	1.8334	1.04032	0.746485	1.22276	1.39565	0.983055	1.09614	1.03026	1.91543	1.47317	0.775863	1.03933	1.34496	1.00154	1.14973	1.00095	1.16966	1.13481	0.874269	1.25101	0.895288	1.29041	1.26242	0.889627	188.553	41.31	22.1926	8.66064
P70490	Lactadherin OS=Rattus norvegicus OX=10116 GN=Mfge8 PE=2 SV=1 - [MFGM_RAT]	3	3	15	51	0.487372	1.78282	0.709836	0.554263	0.67345	1.23616	0.757193	0.507423	1.12488	1.73138	0.653311	0.823732	0.6444	1.14065	0.509006	0.454741	0.94165	1.52956	0.512121	0.873488	0.743061	1.26294	1.79954	1.06138	1.17393	2.153	1.33433	0.802645	1.16636	1.97799	1.43768	0.609578	0.849919	0.589074	0.973385	0.726541	145.464	29.27	47.382	7.09326
Q5XI19	Fermitin family homolog 2 (Drosophila) OS=Rattus norvegicus OX=10116 GN=Fermt2 PE=1 SV=1 - [Q5XI19_RAT]	2	12	22	166	0.795113	1.31406	0.906277	1.08987	1.48715	1.048	0.921787	0.829533	0.72137	1.20352	1.01662	0.778746	0.943676	1.09211	1.1851	0.673787	1.27314	1.07064	0.705517	0.825811	1.38721	0.574205	1.41794	0.922291	1.00648	0.809405	0.758275	0.812501	0.722887	1.16118	1.40584	0.735792	1.19815	0.799568	0.817417	1.3135	519.865	39.56	77.8255	6.69775
P62494	Ras-related protein Rab-11A OS=Rattus norvegicus OX=10116 GN=Rab11a PE=1 SV=3 - [RB11A_RAT]	4	8	9	42	1.18861	0.973507	0.965997	0.98642	1.19571	1.04762	1.00747	0.85478	0.902227	0.977468	1.12635	0.879081	1.05221	1.06117	1.03492	1.93035	1.02833	0.934934	0.789154	0.719854	1.27804	1.30595	1.05047	0.94393	1.1139	0.969496	0.941654	0.892699	0.66267	1.11328	1.16307	0.853473	0.993867	0.81626	1.11437	1.15457	150.159	40.74	24.3784	6.56592
Q9ER34	Aconitate hydratase, mitochondrial OS=Rattus norvegicus OX=10116 GN=Aco2 PE=1 SV=2 - [ACON_RAT]	1	16	27	196	0.984199	1.14232	0.66084	0.9296	1.08083	0.917021	1.34119	0.959766	0.910534	0.994558	0.823392	1.21028	0.764487	1.10361	1.0875	1.15718	1.29059	0.897066	0.634683	0.887926	0.829561	1.96045	1.12776	0.876004	1.16481	0.920184	0.921933	0.903107	0.831282	1.18276	0.851222	0.755707	1.16093	1.00446	0.953209	0.971738	632.248	35.64	85.38	7.82568
P15865	Histone H1.4 OS=Rattus norvegicus OX=10116 GN=Hist1h1e PE=1 SV=3 - [H14_RAT]	3	1	14	128				1.2461				1.51341				1.33408								1.77578				1.07526				1.19608				0.626037				1.16668	660.691	38.36	21.974	11.1069
O08590	Membrane primary amine oxidase OS=Rattus norvegicus OX=10116 GN=Aoc3 PE=1 SV=4 - [AOC3_RAT]	2	16	26	284	1.09429	1.07807	0.720164	1.07875	1.37829	0.969781	0.865	0.769075	0.677799	1.04621	0.783087	0.70421	0.917642	1.34375	1.58701	1.71873	1.00793	0.97151	0.580973	0.702208	1.31715	1.28904	1.27239	0.971328	1.04274	0.75561	0.772769	0.774446	0.630987	0.931443	1.24091	0.650942	1.40715	0.766074	0.836511	1.29843	1079.14	39.71	84.9275	6.49365
P25113	Phosphoglycerate mutase 1 OS=Rattus norvegicus OX=10116 GN=Pgam1 PE=1 SV=4 - [PGAM1_RAT]	2	5	8	45	0.963586	0.963244	1.05753	0.892399	1.03628	1.08744	0.926504	0.949072	1.34185	1.02908	1.07617	1.08658	0.816848	1.25345	1.02794	1.28585	0.823645	0.919085	0.86598	0.771365	0.698642	1.47633	1.01878	1.00469	0.84442	1.05131	0.962056	0.953864	0.959596	0.987782	0.766566	1.3465	1.27727	1.1152	0.905849	1.04825	190.004	40.55	28.8139	7.18115
P50398	Rab GDP dissociation inhibitor alpha OS=Rattus norvegicus OX=10116 GN=Gdi1 PE=1 SV=1 - [GDIA_RAT]	1	6	13	70	1.0849	0.905511	0.613907	1.082	1.24426	1.06772	0.947748	0.836284	0.754884	1.15886	0.861704	0.933758	0.708664	1.21779	1.3376	1.33955	1.15325	0.957218	0.704296	0.817707	1.07863	1.16034	1.31227	0.939111	1.13814	0.831767	0.777235	0.855866	0.720315	0.866238	1.25685	0.922162	1.45369	0.861727	0.881292	1.4004	327.906	35.57	50.5042	5.13525
P36201	Cysteine-rich protein 2 OS=Rattus norvegicus OX=10116 GN=Crip2 PE=2 SV=1 - [CRIP2_RAT]	2	4	6	81	1.38543	1.11688	1.71455	0.688351	0.906201	1.02718	0.795288	1.26635	1.12484	0.894409	1.26679	0.953817	2.79156	1.18603	0.93895	0.405345	0.772263	0.976116	2.1262	0.975746	0.924584	0.478676	0.895828	0.808459	0.801322	1.55582	0.953382	0.915966	0.756414	0.593377	0.63878	1.24335	0.805134	1.83072	0.874724	1.01551	260.665	40.38	22.6811	8.63135
Q62952	Dihydropyrimidinase-related protein 3 OS=Rattus norvegicus OX=10116 GN=Dpysl3 PE=1 SV=2 - [DPYL3_RAT]	2	7	16	62	1.3147	1.05473	0.832503	1.03326	1.16469	1.1543	0.959716	0.926908	0.976929	1.38808	0.945541	0.84192	0.758929	1.04854	1.104	0.518434	1.03532	1.04196	0.803907	0.852461	0.849277	0.720918	1.41678	1.14716	1.55886	1.04996	0.882308	0.976676	1.01218	0.963902	0.979407	0.833736	1.25236	1.03131	0.745996	1.09864	252.4	34.91	61.928	6.49365
P54313	Guanine nucleotide-binding protein G(I)/G(S)/G(T) subunit beta-2 OS=Rattus norvegicus OX=10116 GN=Gnb2 PE=1 SV=4 - [GBB2_RAT]	5	4	9	46			0.880408	0.443055			0.788211	0.980954			0.785244	0.80578			1.34005	3.38178			1.06477	1.01994			1.21319	1.87787			0.994968	1.03675			0.825803	2.1232			0.724739	0.946244	209.29	32.94	37.3071	5.99854
Q5U211	Sorting nexin-3 OS=Rattus norvegicus OX=10116 GN=Snx3 PE=1 SV=1 - [SNX3_RAT]	1	2	6	25		0.772793	1.23367	1.03635		0.970793	0.872113	1.13453		0.702268	1.15881	1.57696		0.920902	0.722779	1.10369		0.947909	1.81235	1.09563		1.1035	0.564307	0.928422		1.23526	1.01499	1.00691		0.921802	0.596526	1.81131		1.25788	1.02413	0.856074	86.7867	35.8	18.7508	8.66064
P62142	Serine/threonine-protein phosphatase PP1-beta catalytic subunit OS=Rattus norvegicus OX=10116 GN=Ppp1cb PE=1 SV=3 - [PP1B_RAT]	5	3	10	19	0.829484		1.04696	1.05841	1.44651		0.897817	0.761648	0.739447		1.12518	0.910525	2.83805		0.859045	0.726012	0.950785		0.819779	0.853447	3.53265		1.334	0.893059	1.3056		0.881133	0.929453	1.74889		1.53902	0.685108	0.742535		0.817266	1.11562	106.523	25.69	37.1626	6.18896
P18418	Calreticulin OS=Rattus norvegicus OX=10116 GN=Calr PE=1 SV=1 - [CALR_RAT]	1	9	18	117	0.664438	1.07	0.903843	1.11481	1.31254	1.14418	0.864743	1.07711	1.319	0.861877	1.03435	0.840474	0.612934	1.32253	0.785516	0.994731	0.941843	1.00549	1.10449	1.05983	0.919853	1.08481	0.87457	0.936446	1.08136	1.01614	1.08892	1.10049	1.13925	1.06025	1.05902	0.682767	0.848322	0.912311	1.12534	0.939203	255.185	34.13	47.9658	4.48779
B0BNJ1	LOC683667 protein OS=Rattus norvegicus OX=10116 GN=Sri PE=1 SV=1 - [B0BNJ1_RAT]	1	4	7	26	0.860591	0.940073	0.888307	1.05311	1.00562	1.04724	0.707744	1.24882	1.1603	0.846072	0.973351	0.882479	0.805777	1.05061	0.855869	1.12924	1.04082	1.06007	1.03863	0.959126	1.06614	0.9976	0.779801	0.823173	1.16	0.871434	0.833051	1.02483	1.0466	0.964717	0.957245	1.16033	1.20334	1.34362	0.879147	1.22266	112.039	34.85	21.6103	5.89697
A0A0G2K0T6	Gamma-synuclein OS=Rattus norvegicus OX=10116 GN=Sncg PE=1 SV=1 - [A0A0G2K0T6_RAT]	5	4	4	25	1.25551	1.07831	1.37011	0.658368	0.533816	1.71899	0.906583	0.610308	2.83298	0.552006	1.24736	1.51967	0.90278	0.821256	0.396692	0.700422	0.400799	0.983192	1.73574	1.26669	0.439696	0.668656	0.530035	1.0008	0.587095	1.67345	1.43798	1.37509	2.44754	1.279	0.56349	0.954136	1.24077	1.24733	1.24401	0.700768	159.861	39.84	13.0376	4.70361
D4A617	Ectonucleoside triphosphate diphosphohydrolase 1 OS=Rattus norvegicus OX=10116 GN=LOC103689954 PE=3 SV=2 - [D4A617_RAT]	3	10	14	116	0.913376	1.06509	0.664581	1.03921	1.25978	1.1226	0.866145	0.862787	0.871453	1.02542	0.973835	0.736712	1.29222	1.20864	1.25142	1.63912	0.946013	1.00132	0.854353	0.74751	1.09105	1.35533	1.16194	0.886116	1.00592	0.874868	0.951403	0.907858	0.76596	1.01076	1.1368	0.754972	1.09144	0.881116	0.993996	1.10323	374.515	36.56	51.9831	7.02002
P62982	Ubiquitin-40S ribosomal protein S27a OS=Rattus norvegicus OX=10116 GN=Rps27a PE=1 SV=2 - [RS27A_RAT]	7	3	6	31	1.38558	1.01099	1.18532	0.997431	1.00895	1.11185	0.918051	0.931972	1.0862	1.32736	1.11862	0.915244	1.50923	1.26539	0.98009	0.617714	0.798629	1.06134	0.997181	0.899178	0.988204	0.809414	1.05801	1.01714	0.884256	0.911159	0.952511	0.857336	1.17532	0.844159	1.12287	0.992092	1.31881	1.04125	0.894722	1.03514	158.48	39.74	17.9395	9.64209
P97532	3-mercaptopyruvate sulfurtransferase OS=Rattus norvegicus OX=10116 GN=Mpst PE=1 SV=3 - [THTM_RAT]	1	5	8	55	1.04205	0.814033	1.0732	1.00801	1.28954	1.01105	0.937933	0.988342	0.928697	0.901764	0.960701	1.20015	1.90094	1.13196	0.968342	1.41851	0.902762	0.871295	1.08659	0.926886	1.25146	1.34589	0.849362	0.940988	1.009	0.903299	0.934	0.894097	0.882127	0.885207	0.833413	1.58813	0.976118	1.06993	1.04053	0.986468	242.377	39.73	32.9194	6.31592
Q5I0M1	Apolipoprotein H OS=Rattus norvegicus OX=10116 GN=Apoh PE=1 SV=1 - [Q5I0M1_RAT]	2	4	12	117	1.38904	0.574138	2.26314	0.938332	0.486205	0.737288	0.88057	1.23074	1.50339	0.556481	0.891054	1.67341	1.90738	0.675204	0.638693	0.944966	0.529054	0.851721	1.64865	1.21809	0.699008	0.849861	0.439327	0.920579	0.672946	1.32462	1.18451	1.04722	1.09151	0.615208	0.742065	1.74875	0.864773	1.25611	1.08579	0.882966	295.404	36.81	38.4317	8.20654
Q80ZA3	Alpha-2 antiplasmin OS=Rattus norvegicus OX=10116 GN=Serpinf1 PE=1 SV=1 - [Q80ZA3_RAT]	1	8	12	45	0.993041	0.851673	1.25339	0.952967	1.61558	0.769654	1.02218	0.973187	0.927055	0.74514	1.15395	1.01609	2.74888	0.941016	1.26707	1.5953	0.932956	0.746839	0.863608	1.05694	3.01324	1.06178	1.21045	1.01915	1.29789	0.826663	1.29316	1.20859	1.27282	0.699923	1.12008	1.08735	1.2637	0.782206	1.37054	1.17978	214.973	28.71	46.4362	6.46826
P62959	Histidine triad nucleotide-binding protein 1 OS=Rattus norvegicus OX=10116 GN=Hint1 PE=1 SV=5 - [HINT1_RAT]	2	3	5	38	1.13683	0.74144	1.48002	0.871151	0.887529	0.995133	1.05748	1.21547	1.88145	0.636788	1.08082	1.64523	1.78828	0.879937	0.529365	0.94163	0.659915	0.83918	1.64288	1.17397	0.643798	1.04595	0.421866	0.955691	0.837095	1.14057	1.12996	1.06957	1.25494	0.732441	0.587716	2.15599	0.827609	1.31249	1.20379	0.735023	161	39.68	13.7681	6.87354
A0A0G2K654	Histone cluster 1 H1 family member c OS=Rattus norvegicus OX=10116 GN=Hist1h1c PE=1 SV=1 - [A0A0G2K654_RAT]	3	3	13	135				0.961535				0.963144				1.12831				0.395758				1.04123				0.836714				1.02698				0.884856				0.781307	689.176	39.62	21.3037	11.0044
Q91Y81	Septin-2 OS=Rattus norvegicus OX=10116 GN=Sept2 PE=1 SV=1 - [SEPT2_RAT]	1	6	10	39	0.661694	1.32661	0.904641	0.977519	1.06234	1.00787	1.07638	1.00314	0.921963	1.15467	1.18351	0.79574	0.747038	0.888093	1.00029	0.481399	1.12838	1.17067	1.04177	0.935061	1.29533	0.545644	1.10965	0.992268	0.756218	0.944077	0.939195	1.04779	0.997341	1.21611	1.33968	0.812101	0.953762	1.02016	0.956562	1.13025	188.56	35.73	41.5663	6.59521
P82995	Heat shock protein HSP 90-alpha OS=Rattus norvegicus OX=10116 GN=Hsp90aa1 PE=1 SV=3 - [HS90A_RAT]	2	10	27	182	0.794626	1.17844	1.00296	1.1103	1.58405	1.12506	0.991526	0.790693	0.898262	1.23856	1.05735	0.844452	0.763957	1.04787	1.01226	0.620898	1.29812	1.01131	0.76514	0.808412	1.32141	0.772344	1.52464	0.991194	1.14084	1.06505	0.950835	0.860092	0.960845	0.987905	1.01757	0.695361	1.16884	0.885939	0.827712	1.14337	673.582	33.56	84.7618	5.0083
Q63041	Alpha-1-macroglobulin OS=Rattus norvegicus OX=10116 GN=A1m PE=1 SV=1 - [A1M_RAT]	1	21	43	295	0.947941	0.881581	0.490011	1.4805	0.368493	1.16878	1.11755	0.572264	0.747946	1.00563	1.12029	1.12018	0.435958	0.967172	1.21706	1.33626	1.29085	0.873351	0.470258	0.976268	1.84369	1.39134	1.31709	0.846638	1.21364	1.24453	1.26868	0.992618	0.443221	0.692244	0.582487	0.805354	1.26246	0.623401	1.19991	0.96277	1237.6	32.13	167.019	6.90283
P63025	Vesicle-associated membrane protein 3 OS=Rattus norvegicus OX=10116 GN=Vamp3 PE=1 SV=1 - [VAMP3_RAT]	2	2	2	7	1.15585		2.14531		1.5184		0.833312		1.38444		0.911008		1.02196		0.974956		0.928684		2.0665		1.14973		0.964531		1.28837		1.22691		1.08665		0.650607		1.33433		0.747127		65.8367	38.83	11.473	8.49951
G3V6E7	Fibromodulin OS=Rattus norvegicus OX=10116 GN=Fmod PE=4 SV=1 - [G3V6E7_RAT]	2	6	10	69	1.4622	0.810481	1.21997	0.888318	0.618172	1.02608	0.889347	0.953833	1.40162	0.645087	0.872152	1.00655	1.5866	1.14578	0.84597	1.01227	0.725231	0.916615	1.26113	1.24442	0.783011	1.6315	0.846502	1.05258	1.26207	0.925482	1.2055	0.947974	1.21965	0.916578	0.797488	1.35863	0.950114	1.00441	1.03046	0.966528	297.517	31.12	43.1065	5.89697
D3ZRX9	Calponin (Fragment) OS=Rattus norvegicus OX=10116 GN=Cnn2 PE=1 SV=3 - [D3ZRX9_RAT]	1	3	7	30		1.15488	1.51695	0.816837		0.934355	1.10361	0.947208		1.07361	1.10194	0.925553		0.8647	0.654218	0.487335		1.12651	1.74432	1.15363		0.667172	0.989821	1.14898		1.18662	1.04199	1.18436		1.09364	1.09843	1.00801		1.0885	1.16868	0.8336	132.602	38.81	24.054	8.68994
Q9Z1H9	Caveolae-associated protein 3 OS=Rattus norvegicus OX=10116 GN=Cavin3 PE=1 SV=1 - [CAVN3_RAT]	1	7	8	92	1.30218	0.894122	1.84523	0.842712	0.687655	0.999286	0.867802	1.50127	1.01763	0.877784	0.992702	1.1677	1.4847	0.73842	0.818977	0.416029	0.81037	1.15466	1.8712	0.943411	0.982083	0.393844	0.812635	1.05996	0.708743	1.08413	1.05158	1.06964	1.39059	0.819715	1.16891	1.02495	0.825869	1.35008	0.911516	0.874483	310.222	38.78	27.8937	6.1001
P12075	Cytochrome c oxidase subunit 5B, mitochondrial OS=Rattus norvegicus OX=10116 GN=Cox5b PE=1 SV=2 - [COX5B_RAT]	1	2	4	19	1.0432	0.917512	1.33285	0.753899	1.42161	0.982437	1.00018	1.60567	0.7326	0.975834	0.90596	1.32056	1.98256	1.02027	0.854264	0.758715	1.53341	0.920747	1.39654	1.27629	1.81768	1.28196	0.790889	0.822918	1.21375	1.14523	1.014	1.0482	1.02905	0.956294	0.74816	1.80125	0.757061	1.50212	0.993739	0.81773	128.19	32.56	13.9059	7.78174
G3V7J0	Aldehyde dehydrogenase family 6, subfamily A1, isoform CRA_b OS=Rattus norvegicus OX=10116 GN=Aldh6a1 PE=1 SV=1 - [G3V7J0_RAT]	2	10	17	99	0.811263	1.05587	0.868653	1.26449	1.3797	1.1724	1.0377	0.798676	0.811935	1.15168	0.988231	1.00718	0.758989	1.21292	1.06361	1.03905	1.28285	1.02711	0.895351	1.00305	1.12398	1.03972	1.11789	1.06155	1.22484	0.892139	0.922121	0.886643	0.76775	1.01218	0.996273	0.845217	1.1242	0.985229	0.998822	1.15365	446.817	34.39	57.7105	8.17725
P14604	Enoyl-CoA hydratase, mitochondrial OS=Rattus norvegicus OX=10116 GN=Echs1 PE=1 SV=1 - [ECHM_RAT]	1	6	10	56	1.1318	0.910166	0.729612	1.07165	1.0858	1.07496	1.05601	1.24821	1.31973	0.875205	0.832842	0.999797	0.689683	0.938631	0.949891	0.787458	1.24088	0.919311	1.03411	1.04721	0.897374	1.38996	0.95466	1.02556	1.01198	0.919255	1.11326	1.10222	1.48988	1.06874	0.8446	0.772785	1.06816	1.07535	1.10282	0.915418	323.152	31.03	31.4962	8.1333
M0R7S5	Perilipin 4 OS=Rattus norvegicus OX=10116 GN=Plin4 PE=4 SV=2 - [M0R7S5_RAT]	1	4	4	72	0.845252	1.24612	2.1401	0.807511	1.07928	0.962046	1.32355	1.06306	0.517368	1.08562	0.923918	0.50081	1.54192	0.418301	0.795643	0.290243	1.36392	1.43434	1.42612	1.30547	1.58693	0.337401	1.07148	1.42011	0.475223	1.06071	0.847462	1.20993	1.16532	1.38685	1.50088	0.512914	0.608112	0.91377	0.684679	0.783353	384.811	38.49	141.175	9.0415
Q9WUC4	Copper transport protein ATOX1 OS=Rattus norvegicus OX=10116 GN=Atox1 PE=1 SV=1 - [ATOX1_RAT]	1	1	3	14	1.09297	0.664643	1.70433	0.847283	0.780619	0.936065	1.00405	1.12716	1.73968	0.568785	1.15254	1.44046	1.8185	0.837617	0.584743	0.894374	0.501664	0.762911	1.81934	1.08857	0.460411	1.14372	0.482479	0.917503	0.607296	0.878219	1.06708	0.908814	1.25617	0.75017	0.646351	2.28032	0.777997	1.02105	1.18438	0.599504	48.78	38.24	7.28769	7.23975
Q6MG61	Chloride intracellular channel protein 1 OS=Rattus norvegicus OX=10116 GN=Clic1 PE=1 SV=1 - [CLIC1_RAT]	1	3	6	20	0.770795	0.898046	0.9461	1.02205	1.02743	1.0646	0.985389	0.755107	1.05158	0.904081	1.10413	1.01867	0.800877	1.18448	1.04886	1.48796	0.796501	0.922637	0.956118	0.83787	0.76913	1.1613	1.15446	0.825764	0.921955	0.96877	1.14769	1.0183	0.664687	0.916219	1.19076	1.08519	1.32307	1.08071	1.14523	1.05408	139.833	34.44	26.9638	5.17334
P85971	6-phosphogluconolactonase OS=Rattus norvegicus OX=10116 GN=Pgls PE=1 SV=1 - [6PGL_RAT]	2	4	6	47	1.46579	0.765385	1.34219	0.955029	0.863743	1.03312	0.939235	1.13338	1.37034	0.732602	1.01957	1.29724	1.79463	1.01999	0.862652	1.19459	0.695261	0.864714	1.6743	1.07711	0.724122	1.11554	0.703975	0.973343	0.794519	1.03796	1.17415	1.0703	1.11453	0.774108	0.750589	2.02613	0.925184	1.16081	1.01871	0.854213	235.69	38.13	27.2173	5.84619
D3ZVB7	Osteoglycin OS=Rattus norvegicus OX=10116 GN=Ogn PE=1 SV=1 - [D3ZVB7_RAT]	1	9	12	145	1.26203	1.05025	1.08824	0.966453	0.966628	0.943719	0.717576	1.03683	0.922078	1.05148	0.856033	0.998544	1.14955	1.37478	1.21369	2.02102	0.981216	0.826311	0.878985	0.85186	0.859694	2.24285	0.717532	0.626168	0.98775	0.922759	0.885355	0.761653	0.957803	0.864136	0.832616	1.18117	1.02195	1.11495	0.866638	1.15691	509.458	37.92	34.0477	6.18896
P37397	Calponin-3 OS=Rattus norvegicus OX=10116 GN=Cnn3 PE=1 SV=1 - [CNN3_RAT]	1	7	13	76	1.10711	1.18948	1.35714	0.893451	0.77454	1.13215	0.927343	0.809527	1.38607	1.26187	1.08265	1.09759	1.68001	0.974797	0.742838	0.669442	0.735687	0.857596	1.34689	1.08483	0.625724	0.89613	1.23452	1.05264	1.83663	1.30207	1.05224	1.17176	1.36918	1.17461	0.780775	1.05301	0.954776	1.01095	1.21431	1.07969	249.507	30.61	36.4118	5.71924
Q6B345	Protein S100-A11 OS=Rattus norvegicus OX=10116 GN=S100a11 PE=3 SV=1 - [S10AB_RAT]	3	3	4	114	1.09557	0.76725	1.22005	0.950837	1.02795	1.0903	0.75754	1.33488	1.50975	0.772036	0.966819	0.989769	1.30334	0.904025	0.719005	0.858782	0.72219	0.932442	1.52371	0.995232	0.711555	1.00439	0.611499	0.928786	0.9844	1.17602	1.11399	1.38376	1.02845	0.839646	0.789171	1.52187	1.01266	1.25373	0.940663	0.894706	510.62	37.76	11.0575	5.89697
D3ZXP3	Histone H2A OS=Rattus norvegicus OX=10116 GN=H2afx PE=1 SV=1 - [D3ZXP3_RAT]	5	1	4	4			1.4574				1.65643				1.15269				1.24235				1.03581				1.50105				1.08735				1.86699				0.75879		46.8539	37.76	15.1054	10.7407
D3ZX38	Prefoldin 1 (Predicted) OS=Rattus norvegicus OX=10116 GN=Pfdn1 PE=1 SV=1 - [D3ZX38_RAT]	1	2	5	6		0.988894		0.850303		0.888757		1.29987		0.776744		1.06796		0.819022		0.628178		0.934177		1.30367		0.749344		1.16188		1.11473		1.05028		1.08988		1.66485		1.33915		0.771746	48.48	28.69	14.2465	6.81494
P0DP29	Calmodulin-1 OS=Rattus norvegicus OX=10116 GN=Calm1 PE=1 SV=1 - [CALM1_RAT]	4	4	7	126	1.07182	0.651393	2.70519	0.817574	0.792101	1.13958	0.795084	1.48504	1.4478	0.652549	0.883312	1.4867	1.0427	0.782064	0.464269	0.834094	0.481774	0.765218	2.11608	1.17557	0.58322	1.15721	0.561584	1.03898	0.871723	1.11734	1.16164	1.1203	1.49463	0.588394	0.548841	1.9011	0.740108	1.65601	0.751262	0.724799	221.316	37.58	16.8268	4.22119
A0A0G2JSV2	Carbonyl reductase [NADPH] 1-like OS=Rattus norvegicus OX=10116 GN=Cbr1 PE=1 SV=1 - [A0A0G2JSV2_RAT]	5	2	8	31	1.16039	0.953547		0.91383	1.1772	1.062		1.09263	1.18285	1.00199		1.07658	1.13447	1.22005		1.03141	0.861441	1.11498		1.14097	0.949489	1.13128		1.47588	1.06085	1.32043		1.1063	1.30905	1.15178		1.30265	1.29921	1.30271		1.01464	176.574	32.49	30.6349	7.76709
P52759	2-iminobutanoate/2-iminopropanoate deaminase OS=Rattus norvegicus OX=10116 GN=Rida PE=1 SV=3 - [RIDA_RAT]	1	2	4	6	0.672804		0.758411	1.73015	0.84947		0.63965	1.06657	0.909408		0.575606	1.12652	0.70369		0.993002	3.37154	0.933377		0.601071	4.0848	0.333612		0.702342	1.66536	0.911552		0.340462	0.625282	1.22011		0.233303	0.471281	0.368814		1.12037	0.566341	65.02	29.93	14.2946	8.104
Q6P9V6	Proteasome subunit alpha type OS=Rattus norvegicus OX=10116 GN=Psma5 PE=1 SV=1 - [Q6P9V6_RAT]	2	4	7	18	1.30093		0.950089	1.13709	0.822186		0.997027	1.1902	1.34095		1.10493	0.909881	1.14694		0.917473	0.702071	0.773375		1.29135	1.1261	0.75324		0.879758	1.06399	0.823094		1.26952	1.23964	1.3462		0.915738	0.774694	0.973759		1.16968	1.05702	74.9375	36.93	26.3942	4.79248
D4ABA5	RCG35999, isoform CRA_a OS=Rattus norvegicus OX=10116 GN=Smtn PE=1 SV=1 - [D4ABA5_RAT]	2	17	29	180	0.974442	1.17173	2.76118	0.616757	0.568103	0.702287	0.964517	1.06037	0.601352	1.19078	0.747227	0.582904	2.5731	0.764081	0.546073	0.355909	0.988941	1.72848	2.36634	1.74395	1.20113	0.33948	0.82204	1.4732	0.402434	1.06869	0.824563	0.908982	1.66188	1.32699	1.30378	0.832701	0.553999	1.00772	0.660595	0.639926	614.215	28.88	99.8182	8.71924
D4ADF5	Programmed cell death 5 OS=Rattus norvegicus OX=10116 GN=Pdcd5 PE=1 SV=1 - [D4ADF5_RAT]	1	3	4	10			1.6168	0.92631			1.02105	1.28525			2.01657	1.42785			0.585492	0.952411			1.67545	1.10021			0.621796	1.02847			1.57395	1.12509			0.921549	1.92093			1.87451	0.890383	72.52	36.8	14.1953	5.68115
D3ZJ08	Histone H3 OS=Rattus norvegicus OX=10116 GN=Hist2h3c2 PE=1 SV=1 - [D3ZJ08_RAT]	6	1	4	74		1.14479	1.64995			0.824633	0.795792			1.8182	1.13189			0.682215	1.31105			1.3446	0.668606			0.25763	1.40257			1.08288	1.05074			1.39976	2.51849			1.36248	0.854722		114.925	36.76	15.3785	11.2681
P54311	Guanine nucleotide-binding protein G(I)/G(S)/G(T) subunit beta-1 OS=Rattus norvegicus OX=10116 GN=Gnb1 PE=1 SV=4 - [GBB1_RAT]	3	2	9	51	1.14501	0.890136	0.839556	1.13795	1.49162	1.07916	1.1581	1.00566	0.734553	1.06823	1.1315	0.758527	0.619157	1.10732	1.61146	1.31996	1.01428	0.9072	0.894338	0.912027	1.1326	1.08916	1.40987	1.07	0.828354	0.681644	0.999717	0.852572	0.688926	0.88185	1.41764	0.867829	1.34642	0.773228	1.03578	1.31675	237.793	34.71	37.353	5.99854
D3ZK97	Histone H3 OS=Rattus norvegicus OX=10116 GN=H3f3c PE=3 SV=1 - [D3ZK97_RAT]	7	1	4	76	0.6992		1.19958	0.540154	0.551759		1.01694	1.20457	0.480177		1.08792	0.829366	1.12216		1.02487	2.44187	1.61548		1.0031	0.861113	2.12196		1.50291	2.18981	0.443111		0.921303	0.987461	1.29127		2.3832	4.28713	0.542053		0.643988	0.569257	190.899	36.76	15.3485	11.2681
Q2LAP6	Testin OS=Rattus norvegicus OX=10116 GN=Tes PE=1 SV=1 - [TES_RAT]	1	8	11	91	1.27884	1.77404	1.352	0.644823	0.868748	0.911308	0.935623	0.884528	0.703155	1.3013	0.931624	0.617751	1.58544	1.05754	0.897701	0.324222	1.57957	1.58029	1.07541	0.889456	1.45111	0.392536	1.21175	1.21406	0.607903	1.28015	0.892709	0.878048	1.07807	1.49509	1.54903	0.589451	0.876592	1.36324	0.568727	0.906443	316.356	36.75	47.5998	7.98682
Q4KM73	UMP-CMP kinase OS=Rattus norvegicus OX=10116 GN=Cmpk1 PE=1 SV=2 - [KCY_RAT]	3	4	6	26	1.19311	0.837723	1.43592	0.856672	0.588144	0.996321	1.10514	1.33918	1.70336	0.67967	0.853768	1.51582	1.58748	0.798155	0.637507	0.749407	0.63162	0.948405	1.58243	1.35428	0.520169	0.922799	0.552677	1.06867	0.579301	1.18956	1.24865	1.19321	1.57163	0.891011	0.639167	1.63523	0.758162	1.38598	0.99783	0.652185	111.394	36.73	22.1552	5.8335
M0RD20	Calpain small subunit 1-like OS=Rattus norvegicus OX=10116 GN=Capns1 PE=1 SV=1 - [M0RD20_RAT]	3	4	8	42	1.31303	0.794795	2.06207	0.924281	1.03858	0.825526	1.01532	1.15938	1.02933	0.966903	0.93623	0.806145	1.8396	0.998911	0.914336	1.7783	0.845823	0.987709	1.59275	1.06366	0.881583	1.13213	0.95099	0.957079	0.993154	1.00943	0.924303	1.07374	1.13727	0.638642	0.778876	1.27095	1.18254	1.01707	0.798623	1.35797	180.86	33.74	25.4304	5.42725
Q99MZ8	LIM and SH3 domain protein 1 OS=Rattus norvegicus OX=10116 GN=Lasp1 PE=1 SV=1 - [LASP1_RAT]	1	6	11	66	1.11225	1.00422	1.58635	1.02442	0.915888	0.897029	0.959165	1.16309	1.26527	0.939941	0.992515	1.00384	1.67352	0.901079	0.933312	0.537819	0.902408	0.923047	1.43981	1.02909	1.08743	0.547963	0.978194	0.907208	0.785054	1.14925	0.992657	1.39555	1.38522	1.01006	1.04888	1.06965	0.827941	1.26052	0.985255	0.993213	246.52	36.5	29.9514	7.04932
G3V936	Citrate synthase OS=Rattus norvegicus OX=10116 GN=Cs PE=1 SV=1 - [G3V936_RAT]	2	10	16	135	1.0619	1.12176	0.967423	0.935056	1.18083	0.982611	1.02738	0.944469	0.966444	0.928949	0.928533	1.0629	0.879357	1.02777	0.998859	0.982277	1.24001	0.985189	0.69416	0.819015	0.827178	1.31847	1.20592	0.971277	1.02696	0.936035	0.864542	0.89139	0.843318	1.06933	1.04419	0.931266	1.26316	1.14244	0.97234	0.976808	403.579	31.12	51.7975	8.41162
G3V946	AIP1, isoform CRA_a OS=Rattus norvegicus OX=10116 GN=Dpy30 PE=1 SV=1 - [G3V946_RAT]	2	2	2	14		1.08385	1.81185	0.713742		0.922188	0.809885	1.12673		0.785432	0.743635	1.4324		0.970023	0.599362	0.883204		0.95955	1.87725	0.894198		1.00408	0.449929	1.07341		1.24762	1.20504	0.884597		0.743802	0.833998	1.86422		1.88509	1.04667	0.683889	59.1833	36.36	11.2058	4.88135
P85968	6-phosphogluconate dehydrogenase, decarboxylating OS=Rattus norvegicus OX=10116 GN=Pgd PE=1 SV=1 - [6PGD_RAT]	2	7	13	45	0.731287	1.07549	0.604319	0.873996	1.20213	0.975744	1.52857	0.842154	0.816997	1.49908	1.01084	1.14531	0.653858	1.05741	1.04126	1.12703	1.23641	0.958226	0.617145	0.744601	1.01692	1.01078	1.20912	0.855902	0.960331	0.857901	0.85166	0.76013	0.875367	1.31542	1.14022	0.926247	1.31803	0.750178	0.958567	1.18236	260.616	27.12	53.202	7.02002
P41562	Isocitrate dehydrogenase [NADP] cytoplasmic OS=Rattus norvegicus OX=10116 GN=Idh1 PE=1 SV=1 - [IDHC_RAT]	1	6	14	57	0.581389	0.985568	0.733816	0.978618	1.5746	1.28734	1.09094	0.724602	0.740679	1.33706	1.18423	0.875121	2.63418	1.39183	1.12495	0.713379	0.922826	0.948462	0.795673	0.802451	3.17311	1.06604	1.27468	0.928939	1.10703	0.954909	0.855823	0.800605	1.11324	1.12309	1.04659	0.856603	0.814397	1.02479	1.11985	1.03278	175.115	30.92	46.7045	6.99072
Q5EBC0	Inter alpha-trypsin inhibitor, heavy chain 4 OS=Rattus norvegicus OX=10116 GN=Itih4 PE=1 SV=1 - [Q5EBC0_RAT]	3	14	29	155	1.27271	1.14904	0.750146	0.99326	0.415144	0.954589	0.679507	0.663627	1.13099	1.10601	0.985221	0.741737	1.01659	1.11104	0.803977	1.10992	1.26453	1.24391	0.598032	0.744145	1.70431	1.55578	0.78961	0.740568	1.48621	1.52184	0.981063	0.87961	0.800076	0.9948	0.507925	0.777858	1.93593	0.98562	0.871669	0.8179	454.037	32.58	103.691	6.20166
Q9Z1Z9	PDZ and LIM domain protein 7 OS=Rattus norvegicus OX=10116 GN=Pdlim7 PE=1 SV=1 - [PDLI7_RAT]	1	7	16	129	0.899183	1.20386	1.2796	1.04129	0.946147	0.967326	0.912457	0.979606	0.901871	1.02049	0.946361	0.844687	1.45889	0.922283	0.8483	0.298464	1.02421	1.22576	1.00981	1.0172	1.23414	0.436867	1.16596	1.01344	0.703854	1.17997	0.888484	0.987692	1.09664	0.992989	1.19861	0.725225	0.904868	1.04992	0.841767	1.09682	343.265	35.89	49.8806	8.47021
P47942	Dihydropyrimidinase-related protein 2 OS=Rattus norvegicus OX=10116 GN=Dpysl2 PE=1 SV=1 - [DPYL2_RAT]	2	7	16	100	0.895751	1.0265	0.721372	1.08269	1.25385	1.11147	1.04239	0.942604	1.11912	1.16235	0.930029	0.966501	0.650336	1.15043	1.06576	0.725472	1.07242	0.972527	0.887783	0.989143	1.06112	0.838834	1.03809	0.977425	0.997995	0.964996	1.05677	1.1193	1.02191	1.00894	0.984857	0.969051	1.09501	0.903367	1.0294	1.29399	522.641	33.92	62.2386	6.37939
P14046	Alpha-1-inhibitor 3 OS=Rattus norvegicus OX=10116 GN=A1i3 PE=1 SV=1 - [A1I3_RAT]	5	13	46	449	1.01067	1.10056	0.638035	1.15912	0.266922	1.21488	1.49488	0.577175	0.815185	0.982819	0.94212	1.26687	0.686479	0.986261	1.10404	1.78154	1.10688	0.835183	0.48086	1.01103	1.4251	1.94533	1.51899	0.957458	1.3657	1.22647	1.2446	0.987324	0.444496	0.975416	0.716657	0.572566	1.14435	0.73927	1.03805	0.833579	1496.49	33.78	163.67	6.03662
B0BN81	40S ribosomal protein S5 OS=Rattus norvegicus OX=10116 GN=Rps5 PE=1 SV=1 - [B0BN81_RAT]	1	1	5	19	0.939585	1.06654	1.28692	1.04907	0.777377	1.10929	0.944212	1.05763	1.08935	1.203	1.0257	1.01737	0.846916	1.07105	1.10719	0.977091	0.80462	0.966639	1.01241	0.928275	0.843103	0.967302	1.18948	1.17115	0.881262	1.01667	0.951592	0.989537	0.782754	1.01585	1.16689	1.27458	1.24733	0.907341	1.1015	1.03611	164.84	35.78	22.8921	9.71533
Q4V7C7	Actin-related protein 3 OS=Rattus norvegicus OX=10116 GN=Actr3 PE=1 SV=1 - [ARP3_RAT]	3	7	12	80	1.00711	1.12781	0.844472	1.08627	1.20934	1.17052	1	0.81911	0.909717	1.47258	1.00711	0.860889	0.785643	1.22395	1.11735	0.603037	1.19588	1.143	0.705759	0.87787	1.0902	0.649898	1.3831	1.05181	0.947513	1.06683	0.878311	0.894359	0.802498	1.11741	1.36076	0.814744	1.25724	0.943108	0.896699	1.14232	423.378	30.38	47.327	5.88428
B0BMW2	3-hydroxyacyl-CoA dehydrogenase type-2 OS=Rattus norvegicus OX=10116 GN=Hsd17b10 PE=1 SV=1 - [B0BMW2_RAT]	2	3	6	31	1.08537	1.02361	0.661871	1.15604	1.11237	0.965122	1.10041	0.803979	0.742015	1.11976	0.858331	0.929697	0.743906	1.38532	1.29234	0.980585	1.11864	0.967833	0.99052	0.940358	1.04121	1.3024	0.968729	0.927292	0.839468	0.867134	0.905567	0.766022	0.779333	1.12144	1.01855	0.844989	1.16215	0.956428	0.975194	0.928468	157.155	35.63	27.2325	8.5874
Q497B0	Omega-amidase NIT2 OS=Rattus norvegicus OX=10116 GN=Nit2 PE=1 SV=1 - [NIT2_RAT]	1	7	9	33	1.03509	0.85314	0.92399	1.08164	1.14657	1.13734	1.059	0.969498	1.0917	0.980723	0.903744	0.972982	0.953421	1.0726	1.26325	1.39249	1.04453	0.891133	1.03564	1.03262	0.874919	1.22797	0.974066	1.06962	1.00724	0.832608	0.839586	0.953023	1	0.856747	0.699053	1.08923	1.23316	0.905131	0.982137	0.998993	141.72	35.51	30.6817	7.29834
A0A0G2JSZ5	Protein disulfide-isomerase A6 OS=Rattus norvegicus OX=10116 GN=Pdia6 PE=1 SV=1 - [A0A0G2JSZ5_RAT]	2	8	12	57	1.38668	0.956763	1.13484	1.17519	0.963748	1.06516	0.983162	0.927155	1.05618	0.967704	1.15101	0.945882	1.17668	0.94729	0.999275	0.874588	0.801728	0.980643	1.04569	1.00373	0.83457	0.87971	1.05333	1.07299	1.10031	0.835528	0.985225	1.04543	0.99386	1.02158	1.05836	0.994038	1.23106	0.889398	1.03914	1.02537	285.155	29.66	48.7296	5.18604
F1LP82	Ras-related protein Rab-2A OS=Rattus norvegicus OX=10116 GN=Rab2a PE=1 SV=3 - [F1LP82_RAT]	2	1	5	12	1.13551				1.01934				1.01927				1.1737				1.00099				0.99018				1.0696				1.06264				1.16527				52.7667	23.79	22.7904	6.53662
P70580	Membrane-associated progesterone receptor component 1 OS=Rattus norvegicus OX=10116 GN=Pgrmc1 PE=1 SV=3 - [PGRC1_RAT]	2	2	4	14		0.605361	1.7196	1.36881		0.860028	0.634587	1.39303		0.801011	1.04448	1.07858		0.940767	0.768222	1.44406		0.810395	1.37969	1.2536		1.07621	0.806578	1.20783		0.44539	1.03868	1.15583		0.571949	1.26094	2.3671		1.30413	1.63086	1.16962	65.73	31.28	21.5847	4.60205
G3V7N2	Galectin OS=Rattus norvegicus OX=10116 GN=Lgals5 PE=1 SV=1 - [G3V7N2_RAT]	1	1	4	27	0.920064		0.602606		1.05252		0.885654		0.451006		1.31789		1.68076		1.92759		1.12973		1.13349		1.83862		0.893029		1.46069		1.45027		0.929433		1.03297		1.27599		2.00166		117.817	35.17	16.3621	7.85498
P10818	Cytochrome c oxidase subunit 6A1, mitochondrial OS=Rattus norvegicus OX=10116 GN=Cox6a1 PE=1 SV=2 - [CX6A1_RAT]	1	1	3	8	1.43962			0.957684	0.883135			1.62657	1.3016			1.93414	1.75803			1.41057	1.04154			1.28624	1.03779			1.1719	0.891235			1.31338	1.07195			2.28879	0.541016			0.992568	41.66	33.33	12.2933	9.31982
F1M8E9	Lysozyme OS=Rattus norvegicus OX=10116 GN=Lyz2 PE=1 SV=1 - [F1M8E9_RAT]	4	2	4	14	1.08909	0.792152	0.803892	1.50542	1.42429	0.998211	1.29017	1.35432	1.06505	0.427762	0.955215	1.00725	0.674851	0.889074	0.894644	1.13698	0.949762	1.06263	1.29704	1.9916	0.703742	1.69213	0.562522	1.05187	1.20225	0.821693	1.49168	1.14443	0.543207	0.871804	0.637505	1.33884	1.30687	1.03672	1.04223	0.466764	51.93	35.14	16.7072	8.93896
Q6MG60	N(G),N(G)-dimethylarginine dimethylaminohydrolase 2 OS=Rattus norvegicus OX=10116 GN=Ddah2 PE=1 SV=1 - [DDAH2_RAT]	1	5	8	38	0.730244	0.784349	0.845703	1.05829	1.41487	1.21448	0.948494	1.09576	1.20006	0.802221	1.39269	0.987892	1.16277	1.0943	0.740597	1.58793	1.01302	0.930602	1.20074	0.856674	1.17376	1.37713	0.780127	0.854778	1.08907	1.07986	1.24678	1.03461	1.00837	1.06646	0.93826	1.34037	0.929565	1.06628	1.32758	1.028	171.1	29.47	29.6694	6.01123
P63255	Cysteine-rich protein 1 OS=Rattus norvegicus OX=10116 GN=Crip1 PE=1 SV=2 - [CRIP1_RAT]	1	3	4	23	1.36116	0.961598	1.86233	0.890928	0.659284	0.706062	0.593466	0.740272	1.09507	0.549638	0.812929	1.45014	2.44556	0.847798	0.703876	0.457875	0.743949	1.31648	1.56786	0.999234	0.95074	0.507011	0.821861	0.292597	0.598794	1.89483	0.782991	1.34688	1.27007	1.0173	0.798358	0.976446	0.695453	1.39456	1.12455	0.768598	92.5667	35.06	8.54399	8.57275
Q62920	PDZ and LIM domain protein 5 OS=Rattus norvegicus OX=10116 GN=Pdlim5 PE=1 SV=2 - [PDLI5_RAT]	1	8	17	76	0.819996	1.44862	1.18435	1.11314	0.989692	0.897577	0.851376	0.89048	0.970843	1.08987	1.09655	0.796024	0.883768	0.956111	0.717192	0.306502	1.14862	1.20156	0.830476	1.14895	1.04302	0.379242	1.15653	0.954316	0.831442	1.22982	0.894703	1.21105	0.869133	1.35111	1.49413	0.590671	0.935827	1.06536	0.867542	1.11334	227.987	30.46	63.1612	8.38232
A0A0G2JTC7	RCG32245 OS=Rattus norvegicus OX=10116 GN=Svs5 PE=4 SV=1 - [A0A0G2JTC7_RAT]	2	3	5	18	0.381139		0.560329		10.4753		7.13548		0.454929		0.576183		2.7278		0.920939		0.78264		0.584448		6.23902		2.32522		0.629727		0.612103		0.985825		0.813659		0.489383		0.639512		175.018	34.96	13.6108	10.2134
Q06647	ATP synthase subunit O, mitochondrial OS=Rattus norvegicus OX=10116 GN=Atp5po PE=1 SV=1 - [ATPO_RAT]	1	5	7	35	0.925579	1.05718	1.2652	1.11609	1.31879	1.14682	1.00528	0.97762	0.972274	1.07927	0.891273	0.961267	0.88992	0.95225	0.992233	0.720102	1.15235	1.06205	1.04021	0.83788	1.15884	0.909769	1.04567	0.891433	0.908517	1.0533	0.834899	0.76412	0.871387	1.02904	1.18931	0.888457	1.11827	1.004	0.972142	1.1329	188.466	27.7	23.3828	10.0229
P24368	Peptidyl-prolyl cis-trans isomerase B OS=Rattus norvegicus OX=10116 GN=Ppib PE=1 SV=3 - [PPIB_RAT]	1	6	8	51	0.899559	1.07534	1.02421	1.11106	1.16627	1.04645	1.0171	0.95855	0.959408	1.03334	1.1577	1.22533	0.441684	1.06418	1.19409	1.1883	0.838949	0.905191	1.07817	0.849825	0.901343	1.08024	1.17431	0.981018	0.952827	1.11459	1.08298	0.924082	0.808954	0.998975	1.022	0.941105	1.24321	0.812988	1.06553	1.07745	189.691	34.72	23.7875	9.49561
Q9Z1B2	Glutathione S-transferase Mu 5 OS=Rattus norvegicus OX=10116 GN=Gstm5 PE=1 SV=3 - [GSTM5_RAT]	1	4	6	32	0.997572	0.888936	1.35624	1.42771	0.81936	1.02765	1.40704	0.949686	0.720738	0.806652	1.41917	0.964083	0.663679	0.987252	1.27661	1.29982	0.723965	1.26387	1.21439	0.804325	0.744002	0.816732	1.13617	0.727717	1.49845	0.886481	0.830841	1.04784	0.506947	1.03552	1.3862	1.1081	1.25048	1.23147	1.2738	1.34401	139.89	34.67	26.6111	6.75635
P15650	Long-chain specific acyl-CoA dehydrogenase, mitochondrial OS=Rattus norvegicus OX=10116 GN=Acadl PE=1 SV=1 - [ACADL_RAT]	1	8	14	95	0.512737	0.983674	0.669228	0.99256	1.2258	1.04261	1.30027	0.928547	1.00555	1.18099	0.923978	0.940973	0.565311	1.09408	1.05702	1.06579	1.92284	0.818953	0.577519	0.856159	0.943365	1.78269	1.29778	1.00108	1.36002	0.82116	0.931775	0.853983	0.817432	0.930523	0.822857	0.68159	1.15215	1.01005	0.957125	0.956792	297.227	32.33	47.8424	7.73779
Q63910	Alpha globin OS=Rattus norvegicus OX=10116 GN=Hba-a3 PE=1 SV=2 - [Q63910_RAT]	2	2	5	137	0.470479	0.761376	0.462007	1.38771	4.31826	0.985903	2.44244	0.854931	0.575186	1.37952	0.904026	3.82371	1.67932	0.660201	0.756651	1.38125	0.946469	0.577915	0.853894	0.892226	1.73143	0.919632	0.604528	0.850663	1.27532	0.728406	1.05287	0.994134	0.634481	0.683353	0.524989	1.31573	0.808507	0.591908	1.17994	0.709844	343.93	34.51	15.515	8.22119
P14841	Cystatin-C OS=Rattus norvegicus OX=10116 GN=Cst3 PE=1 SV=2 - [CYTC_RAT]	1	1	4	15	1.05227	0.474235	1.40102	0.970782	0.909319	0.774468	1.15582	1.18842	1.61715	0.697422	0.834043	1.62131	2.22575	0.857863	0.594444	1.07833	0.631257	0.744972	1.53753	1.2858	0.595308	1.04334	0.622322	1.18601	0.918886	0.891677	0.936671	1.11146	1.37804	0.89806	0.661159	2.01673	0.777801	1.30769	0.866849	0.91469	92.6467	34.29	15.4268	9.21729
D4AD70	Uncharacterized protein OS=Rattus norvegicus OX=10116 PE=3 SV=1 - [D4AD70_RAT]	3	1	2	5																																					36.76	34.29	8.24076	10.0962
G3V615	Complement factor B OS=Rattus norvegicus OX=10116 GN=Cfb PE=1 SV=1 - [G3V615_RAT]	3	8	21	76	1.03821	0.85074	0.960777	1.37462	0.583001	0.749076	1.10623	0.753438	1.19979	0.716821	1.29964	0.974545	0.998506	1.02727	1.07535	1.29205	0.865675	0.958432	0.755721	1.21386	1.03423	1.30659	1.10147	0.792698	1.38207	1.40491	1.67425	1.26914	0.60636	0.819943	0.687221	0.967997	1.536	0.889315	1.33693	0.876847	268.34	25.43	85.2987	6.96143
A0A0A0MY09	Endoplasmin OS=Rattus norvegicus OX=10116 GN=Hsp90b1 PE=1 SV=1 - [A0A0A0MY09_RAT]	3	10	24	114	0.865974	1.11481	0.862121	1.13244	1.42452	1.01069	0.957773	0.724652	0.668182	1.28196	0.908349	0.700672	0.519989	1.143	1.23658	0.896107	1.08668	1.05891	0.684832	0.964629	1.23388	0.818592	1.29019	1.06235	1.20278	0.823474	0.874545	0.840723	0.766798	1.14488	1.28346	0.686949	1.31751	0.816994	0.927953	1.24115	377.919	32.34	92.8424	4.80518
P34058	Heat shock protein HSP 90-beta OS=Rattus norvegicus OX=10116 GN=Hsp90ab1 PE=1 SV=4 - [HS90B_RAT]	3	9	26	188	0.749542	1.23948	0.88917	1.05581	1.35939	1.09101	1.14047	0.795575	0.841514	1.17694	1.13746	0.984224	0.618755	1.06628	1.15261	0.880529	1.214	1.04007	0.69705	0.827988	1.22656	0.864433	1.35732	0.945171	0.969096	0.945813	0.920734	0.912134	0.674138	1.22315	1.27562	0.782635	1.19928	0.978348	0.98841	1.14729	700.128	32.6	83.2291	5.03369
P63245	Receptor of activated protein C kinase 1 OS=Rattus norvegicus OX=10116 GN=Rack1 PE=1 SV=3 - [RACK1_RAT]	2	6	10	39	0.482347	1.0565	0.799553	0.921686	1.55489	1.01237	1.10588	0.767272	0.789339	1.03121	1.08065	0.796794	0.425204	1.13164	1.23542	1.22267	1.23593	0.912616	0.670963	0.846865	1.02604	1.06163	1.37698	1.05403	1.2857	0.948903	0.91914	0.88225	0.570394	1.02033	1.2372	0.935236	1.48609	0.849055	1.0241	0.784741	172.827	34.07	35.0546	7.69385
P07483	Fatty acid-binding protein, heart OS=Rattus norvegicus OX=10116 GN=Fabp3 PE=1 SV=2 - [FABPH_RAT]	1	2	4	15		1.00103				1.03982				1.12975				0.921597				0.710335				2.58822				1.06409				1.09361				1.07492			60.8367	33.83	14.7656	6.32861
A0A0G2JYK0	Ab1-233 OS=Rattus norvegicus OX=10116 GN=LOC299282 PE=1 SV=1 - [A0A0G2JYK0_RAT]	6	7	18	180	0.819893	0.863005	0.868308	1.28734	0.740566	1.04897	1.69607	1.13068	0.942244	0.859549	1.20455	1.79251	0.449255	0.792497	1.069	1.66889	0.476565	1.03471	0.930858	1.26785	0.550925	0.98804	0.84032	0.937098	0.550839	0.74233	1.13066	1.18673	1.12503	0.852084	0.767826	0.970601	0.75276	0.690318	1.39581	0.907712	815.214	33.83	67.9404	5.38916
Q3T1J1	Eukaryotic translation initiation factor 5A-1 OS=Rattus norvegicus OX=10116 GN=Eif5a PE=1 SV=3 - [IF5A1_RAT]	2	4	5	40	0.898465	0.870836	0.978333	1.13652	0.838344	1.07304	1.02099	1.16418	1.37276	0.785192	1.14104	1.04041	1.10654	0.874937	0.825567	0.884849	0.792902	0.972584	1.26386	1.08828	0.76567	0.835234	0.790646	1.01832	0.85536	0.976755	1.19055	1.27807	1.18413	0.97382	1.00881	0.867428	0.900716	0.967853	1.16932	0.998314	221.5	33.12	16.8214	5.23682
Q9WVK7	Hydroxyacyl-coenzyme A dehydrogenase, mitochondrial OS=Rattus norvegicus OX=10116 GN=Hadh PE=2 SV=1 - [HCDH_RAT]	1	3	10	86	1.08029	0.915025	0.647028	0.82202	0.868187	0.915032	1.32017	1	1.0251	0.943512	0.831068	1.09271	0.754508	0.965616	1.09379	1.22861	1.4899	0.819108	0.557915	0.89237	0.862876	2.48493	0.964907	0.839579	1.00728	0.875036	0.81567	0.786792	0.93306	1.23298	0.737893	0.635092	1.20573	1.19686	0.917796	0.819858	202.698	33.44	34.4259	8.76318
P05942	Protein S100-A4 OS=Rattus norvegicus OX=10116 GN=S100a4 PE=2 SV=1 - [S10A4_RAT]	1	4	4	76	1.4274	0.666882	1.73458	0.801126	0.648426	0.735387	0.8372	1.11724	2.02332	0.596691	0.997964	1.02453	1.60537	0.789629	0.527072	0.733099	0.612598	1.01282	1.81759	1.0358	0.675128	0.575826	0.820499	1.05334	1.08614	1.52512	0.96406	1.20789	1.36869	0.639878	0.954343	1.77698	0.92919	1.23939	0.809262	1.2931	171.028	33.66	11.7687	5.12256
P81155	Voltage-dependent anion-selective channel protein 2 OS=Rattus norvegicus OX=10116 GN=Vdac2 PE=1 SV=2 - [VDAC2_RAT]	3	4	8	58	0.930356	1.14295	0.666764	0.959601	1.05747	0.989488	0.949467	0.772322	0.660782	1.167	0.819767	0.721075	0.496959	1.07556	1.21158	1.08856	1.21299	1.12353	0.732377	0.885833	1.16233	1.26738	1.11182	0.919612	0.90452	0.763306	0.809736	0.695968	0.80517	1.18841	1.32196	0.603815	1.04867	0.914932	0.880716	1.34487	287.391	31.86	31.7256	7.48877
F1LMC7	Septin-7 OS=Rattus norvegicus OX=10116 GN=Sept7 PE=1 SV=3 - [F1LMC7_RAT]	12	2	13	45	1.22975	1.32092	1.019	1.05527	0.927493	1.03861	0.993719	1.03385	0.611951	1.50665	1.18575	0.846785	0.609055	0.924198	1.17764	0.441447	1.1589	1.27708	1.09717	1.05907	1.28522	0.349133	1.30311	1.00933	1.58148	1.17429	0.853236	1.12678	0.596038	1.27928	1.38707	0.80057	0.930857	1.06181	0.91167	1.27799	156.422	27.06	50.5479	8.57275
Q6AYF2	LIM and cysteine-rich domains 1 OS=Rattus norvegicus OX=10116 GN=Lmcd1 PE=1 SV=1 - [Q6AYF2_RAT]	1	8	13	94	1.07421	1.32241	0.948578	0.887071	1.08929	1.04904	0.782152	0.984211	1.07548	1.17656	1.11675	0.947366	1.15918	0.968545	0.730974	0.405284	0.872471	1.02874	1.15285	1.12177	1.03831	0.508636	1.20192	1.022	0.927631	1.21186	0.84834	1.1932	0.840222	1.0935	1.21308	1.04487	0.944195	1.06887	1.01639	0.917549	338.747	31.23	41.0582	8.01611
A0A0G2JXC3	40S ribosomal protein S21 OS=Rattus norvegicus OX=10116 GN=Rps21 PE=1 SV=1 - [A0A0G2JXC3_RAT]	3	1	3	19	1.06786		1.81251		0.669555		0.796842		1.48986		0.863596		1.87567		0.464649		0.516162		1.93168		0.552736		0.424813		0.588359		1.09081		1.46427		0.696296		0.73155		0.913006		44.21	33.33	8.86043	8.51416
P38983	40S ribosomal protein SA OS=Rattus norvegicus OX=10116 GN=Rpsa PE=1 SV=3 - [RSSA_RAT]	1	3	7	16	0.921257	1.02193	0.96272		0.996301	1.03437	0.98281		1.0375	1.14797	1.00776		0.905011	1.02322	1.0134		0.85347	0.988057	1.14041		0.835235	1.26266	1.2747		1.10121	0.828302	1.04792		0.871755	1.01304	1.02996		0.97495	0.964387	0.840341		77.5421	25.76	32.8034	4.86865
P02764	Alpha-1-acid glycoprotein OS=Rattus norvegicus OX=10116 GN=Orm1 PE=2 SV=1 - [A1AG_RAT]	2	6	13	64	1.68401		0.948991	0.938423	1.41463		0.136764	1.24464	0.423557		2.5212	0.392455	1.04111		0.477105	1.28572	1.54074		0.846678	1.52116	0.851509		0.607161	0.536365	1.40797		2.54644	1.1942	1.16906		0.155984	2.78979	0.553936		1.43231	0.600683	205.279	33.17	23.5601	5.90967
Q80XX4	Musculoskeletal embryonic nuclear protein 1 OS=Rattus norvegicus OX=10116 GN=Mustn1 PE=1 SV=1 - [MSTN1_RAT]	1	2	2	15	0.869874	0.824142	2.06103	0.674075	0.491132	0.682867	0.773499	0.647391	2.98079	0.621054	1.02998	1.65528	3.93701	0.871363	0.424944	0.643249	0.420608	1.01106	1.7825	0.82066	0.537995	0.694444	0.829335	0.686649	0.717231	1.76434	1.3487	1.11599	2.24421	0.706601	0.649097	2.05792	0.743125	0.977461	1.32861	0.767577	109.35	32.93	8.97964	9.64209
P20788	Cytochrome b-c1 complex subunit Rieske, mitochondrial OS=Rattus norvegicus OX=10116 GN=Uqcrfs1 PE=1 SV=2 - [UCRI_RAT]	1	3	6	29	0.864796	1.07921	0.922677	0.970521	1.03665	0.911233	1.31289	1.06043	0.875126	0.944142	0.951178	1.15537	0.569844	0.897931	1.24705	1.94317	1.61868	0.990628	0.74469	0.909073	0.998978	2.17375	1.27082	0.879981	1.31927	0.7702	0.90272	0.971993	0.809376	0.8957	0.947907	0.807003	1.03286	0.783827	1.18973	1.34519	93.48	29.93	29.4272	8.86572
G3V6Y6	Alpha-1,4 glucan phosphorylase OS=Rattus norvegicus OX=10116 GN=Pygb PE=1 SV=2 - [G3V6Y6_RAT]	4	7	25	139	0.901669	0.966749	0.784069	1.08732	1.85202	0.990396	1.14951	0.859352	0.831397	1.03677	1.07553	0.757935	2.54986	1.21325	1.22164	0.852483	1.01976	1.07977	0.627221	0.695059	2.94843	0.866489	1.18442	0.904789	1.17686	0.841671	0.816821	0.771605	1.52014	0.929403	1.55419	0.728164	0.698889	0.941341	0.760449	1.37438	413.279	27.66	96.7134	6.90283
A0A0G2JUW7	Murinoglobulin-1 OS=Rattus norvegicus OX=10116 GN=Mug1 PE=1 SV=1 - [A0A0G2JUW7_RAT]	4	9	41	322	0.940916	1.03006	0.555006	0.956156	0.459795	1.36259	1.07948	0.555432	1.03933	1.05081	0.945047	0.945058	0.588746	1.29093	0.924143	1.25746	1.19689	1.24218	0.437714	0.948809	1.60931	1.97745	1.06161	0.666934	1.24395	1.28318	0.922928	0.834498	0.554795	1.09462	0.561367	0.618149	1.46179	0.887527	1.1064	0.771677	997.429	29.39	165.655	6.27783
G3V7I0	Peroxiredoxin 3 OS=Rattus norvegicus OX=10116 GN=Prdx3 PE=1 SV=1 - [G3V7I0_RAT]	2	2	5	14		1.19246	0.768591	0.346087		1.06424	1.43661	1.26261		0.93818	0.809349	0.622884		1.01437	0.732185	2.07771		1.09313	1.28653	0.821616		1.52586	0.857454	1.1893		1.08653	1.01545	0.971637		1.37151	0.768096	1.54296		1.28969	1.13468	1.07046	56.2561	20.62	28.2815	7.54736
B0BNE5	S-formylglutathione hydrolase OS=Rattus norvegicus OX=10116 GN=Esd PE=2 SV=1 - [ESTD_RAT]	1	4	6	22	1.39882	1.31053	1.19713	0.959797	1.01077	1.03476	1.13339	0.724373	0.878015	1.14769	1.24213	1.12651	1.36024	1.19788	1.1372	0.983297	0.994517	1.27999	1.22249	0.849904	1.013	1.03102	1.36534	0.921312	0.864877	1.07972	0.996212	0.649133	0.912623	1.27662	1.14483	1.00585	1.15893	1.03825	1.00352	0.989126	100.671	21.28	31.3434	6.90283
P04633	Mitochondrial brown fat uncoupling protein 1 OS=Rattus norvegicus OX=10116 GN=Ucp1 PE=1 SV=2 - [UCP1_RAT]	2	5	9	36	1.10705	1.09044	0.345047	0.873683	0.831907	0.734558	1.45873	0.757879	0.736723	0.527556	0.639335	0.776717	1.05015	0.965623	1.06456	2.09089	1.55314	0.803482	0.359733	0.938902	0.958594	3.78413	1.28934	0.824198	1.23842	0.873227	0.761288	0.770868	0.452664	1.27525	0.503201	0.491215	1.1722	1.08312	1.10115	0.763335	139.83	23.45	33.1902	9.05615
P17220	Proteasome subunit alpha type-2 OS=Rattus norvegicus OX=10116 GN=Psma2 PE=1 SV=3 - [PSA2_RAT]	1	3	4	20	1.00815	1.16876	1.05606	1.19181	0.924775	1.06456	1.07893	0.740116	0.939554	1.19171	1.26606	1.00956	0.792631	0.988015	1.11913	0.533067	0.849613	1.03087	0.99584	0.960478	0.975686	0.629909	1.14459	0.994546	0.720077	0.886401	1.09771	1.25231	0.858758	1.11842	1.2079	0.948159	1.04826	0.988145	0.967265	1.1467	148.9	32.48	25.9103	7.43018
P19511	ATP synthase F(0) complex subunit B1, mitochondrial OS=Rattus norvegicus OX=10116 GN=Atp5pb PE=1 SV=1 - [AT5F1_RAT]	1	2	7	35		1.22579		1.23682		1.01208		0.935351		1.08097		0.877054		1.2036		0.779232		1.04163		0.925495		0.553579		0.930474		0.917286		0.959381		1.18665		0.844967		0.681681		1.2671	78.04	25.78	28.8505	9.36377
A0JN30	Canopy 2 homolog (Zebrafish) OS=Rattus norvegicus OX=10116 GN=Cnpy2 PE=1 SV=1 - [A0JN30_RAT]	1	5	6	34	1.65941	0.90507	2.11309	0.786142	1.36495	0.905266	0.847195	1.35748	1.19535	0.597142	0.851581	1.39533	0.993551	0.961156	0.512503	1.01515	1.53636	0.964579	2.10777	1.17582	0.97011	1.19038	0.426297	1.03102	1.46608	1.26572	1.03941	1.19333	1.22941	0.789897	0.679112	2.41566	0.702996	1.4063	1.02395	0.620602	177.665	32.42	20.6963	5.13525
Q63798	Proteasome activator complex subunit 2 OS=Rattus norvegicus OX=10116 GN=Psme2 PE=2 SV=3 - [PSME2_RAT]	1	4	5	13		1.07931	0.94793	1.06611		1.0587	0.825998	0.997469		1.01743	1.19605	1.01706		0.975128	0.77409	1.14264		0.979417	0.707126	0.849294		0.994042	0.787865	0.917184		1.10864	0.961701	0.834501		1.06556	0.884973	1.2773		0.954906	0.915083	1.10672	110.742	26.47	26.84	5.71924
A0A0H2UHU0	40S ribosomal protein S25 OS=Rattus norvegicus OX=10116 GN=Rps25 PE=4 SV=1 - [A0A0H2UHU0_RAT]	5	2	4	17	1.43635	1.0113	1.0005	1.08256	1.05152	0.987131	1.08438	0.808906	1.10118	1.47312	1.23983	1.2195	0.538736	0.940859	1.75453	0.677921	1.02488	1.07113	0.903419	0.878361	1.39588	0.736013	1.66896	1.04558	0.99648	0.881814	0.998024	0.784747	0.824357	0.951928	1.46561	1.1791	0.946423	0.713192	1.15497	0.80805	123.29	32.26	13.6027	10.1108
G3V818	Alpha-parvin OS=Rattus norvegicus OX=10116 GN=Parva PE=1 SV=1 - [G3V818_RAT]	2	6	10	49	1.00085	1.34174	0.951264	1.09106	1.22984	1.07027	0.998135	1.05366	0.7024	1.2635	1.02595	0.659589	0.737382	0.922945	0.922031	0.327747	1.41281	1.34791	0.885805	0.934169	1.54678	0.507742	1.14551	1.10538	0.788686	0.912221	0.746216	0.960152	0.951213	1.31734	1.47512	0.633767	0.966034	1.22612	0.852111	1.08155	257.927	27.69	42.2954	5.94775
Q6P9U0	Serine (Or cysteine) peptidase inhibitor, clade B, member 6a OS=Rattus norvegicus OX=10116 GN=Serpinb6a PE=1 SV=1 - [Q6P9U0_RAT]	1	3	10	43	0.606796	1.1134	0.518733	1.20336	1.24847	1.05782	1.04767	0.743706	0.806907	1.12455	1.13154	0.915812	0.912052	1.19038	1.13322	1.4769	1.14478	0.950912	0.557511	0.858784	1.21234	1.19568	1.13002	1.03173	1.06412	0.788817	0.751349	0.929419	0.610848	1.22033	1.03147	0.746718	1.10538	0.721785	1.01733	1.35288	136.697	21.64	42.9909	6.1001
Q5I0M3	Complement component factor h-like 1 OS=Rattus norvegicus OX=10116 GN=Cfhr1 PE=1 SV=1 - [Q5I0M3_RAT]	2	2	8	51	1.41139	1.00047	2.76844	1.00101	0.348999	0.834099	0.959926	0.858312	1.12303	0.875646	0.90476	1.14145	1.2344	0.946168	0.775679	0.876353	0.630216	1.00597	1.36116	1.13406	0.731172	0.916366	0.637981	0.787449	0.929464	1.40881	1.38401	1.20887	0.779596	0.985787	0.754253	2.15099	1.02076	1.43964	0.85552	0.682876	142.322	31.02	30.6009	7.63525
P00173	Cytochrome b5 OS=Rattus norvegicus OX=10116 GN=Cyb5a PE=1 SV=2 - [CYB5_RAT]	1	3	5	25	0.945209	0.866148	1.23019	1.22072	1.08944	1.11638	0.972883	1.13376	1.07631	0.856821	1.01564	1.04374	1.0176	1.05473	1.06219	2.68429	0.845114	0.852457	1.08199	1.07977	0.882286	1.37102	0.999838	1.46427	0.907723	0.775093	0.956231	0.924362	0.892809	0.805393	1.02605	2.03059	1.02649	1.0619	1.18441	1.11738	102.23	32.09	15.3456	4.98291
F1LN42	Tensin 1 OS=Rattus norvegicus OX=10116 GN=Tns1 PE=1 SV=2 - [F1LN42_RAT]	2	20	39	226	1.06231	1.08746	2.3402	0.753498	0.824452	0.777096	1.01058	1.35818	0.634099	1.02865	1.06369	0.645963	1.73471	0.663919	0.788068	0.435601	1.12272	1.24127	2.11362	1.29453	1.26737	0.362344	0.857972	1.23777	0.425057	1.12736	0.825604	1.08931	1.42459	1.03886	1.19796	0.926843	0.601775	1.42243	0.737317	0.965025	849.063	26.45	203.784	7.76709
Q9ESS6	Basal cell adhesion molecule OS=Rattus norvegicus OX=10116 GN=Bcam PE=2 SV=1 - [BCAM_RAT]	1	8	15	69	0.654042	1.18409	0.87127	0.937988	0.981544	1.10069	0.708844	0.624105	1.40185	1.31499	0.932345	0.719733	0.75498	1.20688	0.792245	1.27231	1.11931	1.29602	0.735157	1.07232	1.19077	0.953457	1.18012	0.952168	1.27076	1.14031	0.987964	1.05878	1.27433	1.53217	1.17892	0.556841	1.11601	0.726956	1.11467	1.15644	353.943	26.92	67.4694	5.78271
P20070	NADH-cytochrome b5 reductase 3 OS=Rattus norvegicus OX=10116 GN=Cyb5r3 PE=1 SV=2 - [NB5R3_RAT]	1	2	5	36	1.12971	1.21596	0.873939		1.02144	1.1323	0.943519		0.970366	1.22608	1.02271		0.885235	1.23102	1.06203		0.942544	1.25751	1.00533		0.949596	1.12441	1.2302		1.69886	1.16346	0.867407		0.879317	1.07944	1.2077		1.24578	1.07797	1.02001		196.24	31.56	34.1527	8.38232
P04550	Parathymosin OS=Rattus norvegicus OX=10116 GN=Ptms PE=1 SV=2 - [PTMS_RAT]	1	3	6	42	0.833745	0.6141	1.9598	0.882475	0.777128	0.955709	0.799825	1.27591	1.80937	0.526272	0.994677	1.08326	1.74844	0.79603	0.507546	0.981811	0.472099	0.769438	1.76018	1.28768	0.509901	0.986405	0.278381	0.63287	0.645751	0.971577	1.12444	1.07592	1.23123	0.68312	0.532806	2.21595	0.721609	1.46331	1.12596	0.825889	277.45	28.43	11.5522	4.1958
F1M953	Stress-70 protein, mitochondrial OS=Rattus norvegicus OX=10116 GN=Hspa9 PE=1 SV=1 - [F1M953_RAT]	2	6	17	87	0.940111	0.942517	0.853012	0.881377	1.06744	0.992891	1.04137	1.17715	1.20323	0.848731	0.882474	0.869089	0.743077	0.964141	0.98595	0.801953	1.2443	1.10875	1.19446	1.12158	1.03202	0.917077	0.814968	1.03698	0.834643	0.926519	1.10986	1.0792	1.11046	1.19014	0.926003	0.818967	0.868262	0.914574	1.1064	1.0318	240.601	22.97	73.6988	6.16357
Q6P6R2	Dihydrolipoyl dehydrogenase, mitochondrial OS=Rattus norvegicus OX=10116 GN=Dld PE=1 SV=1 - [DLDH_RAT]	1	4	9	26	0.941665	1.15655		0.655469	0.886081	0.96888		0.668264	0.954388	1.05624		0.796689	0.824113	0.936392		0.68946	1.09417	0.935348		0.779568	1.05523	1.53134		0.865362	1.11856	0.779819		0.910809	0.88513	0.985176		0.460698	1.2183	0.953594		0.839126	78.6282	21.41	54.0041	7.86963
Q9WVH8	Fibulin-5 OS=Rattus norvegicus OX=10116 GN=Fbln5 PE=2 SV=1 - [FBLN5_RAT]	1	10	13	332	1.37398	1.12272	0.846478	0.921175	1.10597	1.22889	0.753904	1.21777	0.749138	1.2407	0.842796	0.83953	0.924617	1.11787	1.18929	1.01725	1.20277	1.00553	0.979994	0.879612	1.2814	1.35228	0.900518	0.841443	1.20411	0.842451	0.856296	0.869346	0.861737	1.01815	1.00618	1.0448	1.05976	1.27415	0.759773	1.23037	802.483	30.8	50.1267	4.66553
P49242	40S ribosomal protein S3a OS=Rattus norvegicus OX=10116 GN=Rps3a PE=1 SV=2 - [RS3A_RAT]	3	4	7	32		1.4		1.19509		1.08227		0.808712		1.0098		0.993315		1.06874		0.761998		1.14994		0.865698		0.847532		0.988048		1.23015		1.03023		1.02788		0.829377		1.05803		1.23134	59.73	26.14	29.9257	9.72998
A0A0U1RRV7	RCG61099, isoform CRA_b OS=Rattus norvegicus OX=10116 GN=Srsf3 PE=1 SV=1 - [A0A0U1RRV7_RAT]	2	1	3	9	0.816654				1.18763				1.59682				0.716782				0.922967				1.00861				0.774096				1.12302				1.05207				37.7867	30.65	14.1942	10.0815
P85834	Elongation factor Tu, mitochondrial OS=Rattus norvegicus OX=10116 GN=Tufm PE=1 SV=1 - [EFTU_RAT]	1	5	13	55	0.935169	1.066	0.858984	1.02678	0.985653	0.950024	1.2063	1.14958	1.28174	0.907328	0.941982	1.15245	0.64734	0.868761	1.01028	0.787437	1.20833	0.939816	0.930159	1.13525	1.01619	1.20446	0.867026	0.939666	1.03898	0.846071	1.14798	1.09801	1.29601	1.10368	0.921417	0.779549	0.89138	1.13493	1.13731	0.98168	194.392	28.54	49.491	7.56201
A0A0G2JT00	Divalent cation tolerant protein CUTA, isoform CRA_c OS=Rattus norvegicus OX=10116 GN=Cuta PE=1 SV=1 - [A0A0G2JT00_RAT]	3	2	4	51	1.11099	0.780263	1.2682		0.676929	1.05531	0.905976		2.0922	0.716123	1.23288		2.08974	0.868161	0.798914		0.62221	0.870084	1.46397		0.965212	1.02399	0.686563		0.819342	1.06182	0.999343		1.47435	0.821037	0.673824		0.83116	1.21464	1.13937		166.475	30.52	16.4026	6.771
A0A0G2K9X1	Secreted phosphoprotein 24 OS=Rattus norvegicus OX=10116 GN=Spp2 PE=1 SV=1 - [A0A0G2K9X1_RAT]	2	2	4	12	0.733852	1.12277	2.19116	0.755363	0.4387	0.876506	0.534973	0.67225	2.35402	0.874668	0.878539	0.823548	1.86448	0.858418	0.422025	0.586891	0.576884	1.16934	1.69872	1.29401	0.577498	0.658915	0.800216	1.02588	0.551127	1.25103	1.19782	1.15553	1.59881	1.24581	1.01404	1.1094	0.663031	1.04738	0.990409	0.75892	66.53	30.37	14.851	5.92236
P04762	Catalase OS=Rattus norvegicus OX=10116 GN=Cat PE=1 SV=3 - [CATA_RAT]	1	4	12	49	1.00116	0.642331	0.842314	1.4295	2.55631	1.00327	1.4102	1.30414	0.72013	1.00903	0.994502	2.16531	3.01717	0.750899	1.14825	1.45697	1.10527	0.683341	0.952976	1.38316	3.04255	0.825038	1.03124	1.19482	1.58306	0.788089	1.11226	1.22383	1.39268	0.699869	0.724353	0.994933	1.03928	0.828148	1.3991	0.880482	126.103	26	59.7195	7.50342
D4AE68	Guanine nucleotide binding protein, alpha q polypeptide, isoform CRA_a OS=Rattus norvegicus OX=10116 GN=Gnaq PE=1 SV=2 - [D4AE68_RAT]	2	4	7	17	0.676993	1.19777	1.16486	1.03988	1.60776	1.11505	1.14533	0.864301	0.867775	1.03502	1.07117	0.825543	0.604093	1.17887	1.47911	1.35091	1.04859	1.02148	1.09415	0.659146	1.10857	1.18162	1.35153	0.861148	1.21264	0.937682	1.08516	0.725292	0.819716	1.02565	1.13618	0.82949	1.29728	1.04399	0.99575	1.19281	63.5599	26.46	42.1313	5.68115
P97541	Heat shock protein beta-6 OS=Rattus norvegicus OX=10116 GN=Hspb6 PE=1 SV=1 - [HSPB6_RAT]	1	2	3	25	1.18774		1.61973	1.15784	1.14458	1.29373	0.850875	1.86649	1.31445	0.897977	0.997266	1.72655	1.58071	1.28298	0.71006	1.6105	0.779327	0.658818	1.62012	1.09033	1.04336	1.22401	0.596945	0.954995	0.960739	0.930722	1.03427	1.15166	1.25855	0.906187	0.749704	1.9857	0.761395	0.863682	1.07236	0.886623	176.703	30.25	17.4941	6.52197
Q68FY0	Cytochrome b-c1 complex subunit 1, mitochondrial OS=Rattus norvegicus OX=10116 GN=Uqcrc1 PE=1 SV=1 - [QCR1_RAT]	2	8	11	79	0.993521	1.01469	0.718938	0.894051	1.15847	1.03177	1.20075	1.11382	0.960485	0.94264	0.858069	1.0002	0.862477	1.01679	1.19878	1.10348	1.23388	1.01487	0.801086	0.912154	0.951762	1.38597	1.11276	1.12266	1.15936	0.854069	0.888391	0.897688	0.897417	1.0287	0.960638	1.02058	1.11811	0.979659	1.14747	0.964911	345.83	30.21	52.8154	5.88428
Q9ESN0	Protein Niban OS=Rattus norvegicus OX=10116 GN=Fam129a PE=1 SV=2 - [NIBAN_RAT]	1	14	27	159	0.903679	1.03279	1.24511	1.11457	1.33773	0.902433	1.07512	0.88039	0.632182	1.18082	1.10043	0.782645	0.963337	1.22246	1.10997	0.721595	1.20542	1.16276	0.989677	0.865536	1.3023	0.664459	1.21464	1.08726	0.749086	0.815495	0.867891	0.917314	0.717069	0.911197	1.48117	0.694874	1.06155	0.920102	0.816879	1.43512	343.902	24.76	103.401	4.70361
G3V6S3	Calumenin OS=Rattus norvegicus OX=10116 GN=Calu PE=1 SV=1 - [G3V6S3_RAT]	3	2	7	20	0.810354	0.835378	2.03107	0.860879	0.899784	1.10827	0.812942	1.2055	1.87038	0.596043	1.06634	0.95836	1.73633	0.741418	0.452578	0.905404	0.558282	1.04557	2.32178	1.80549	0.639805	0.769513	0.481244	0.948735	0.661827	1.24658	1.16678	1.04231	1.42243	0.900864	0.823672	1.59299	0.644429	1.16006	1.01752	0.807363	57.6671	22.86	37.0405	4.66553
P24090	Alpha-2-HS-glycoprotein OS=Rattus norvegicus OX=10116 GN=Ahsg PE=1 SV=2 - [FETUA_RAT]	3	10	11	184	0.949917	0.579356	1.69759	1.00629	0.395343	0.775765	1.19486	1.30244	1.91709	0.41182	1.25307	1.85166	1.15227	0.700136	0.557824	1.17778	0.382895	0.909212	1.31723	1.74978	0.47744	1.00132	0.400058	0.806829	0.728856	1.16989	1.71316	1.65152	0.979932	0.6765	0.494761	1.71315	0.791834	1.0839	1.54649	0.764277	816.367	30.11	37.9582	6.50732
Q6IE50	SPARC-related modular calcium binding protein 1 OS=Rattus norvegicus OX=10116 GN=Smoc1 PE=1 SV=1 - [Q6IE50_RAT]	1	5	12	69	1.05802	0.750026	1.58957	0.813467	0.40333	0.901857	0.940717	1.64224	1.11429	0.764598	1.189	1.39724	2.20336	0.966937	0.754936	0.705023	0.450485	0.67785	2.19403	1.13565	0.516388	0.813282	0.559697	1.08782	0.955776	1.08494	0.921229	0.979938	0.834676	0.508941	0.730439	2.91409	0.801409	1.38658	1.06205	1.07512	122.145	28.32	49.7457	8.30908
B0K010	Thioredoxin domain-containing 17 OS=Rattus norvegicus OX=10116 GN=Txndc17 PE=1 SV=1 - [B0K010_RAT]	1	3	5	22	0.905233	0.770429	1.22079	1.019	0.998341	1.21061	0.941549	1.42515	2.23067	0.668072	1.04052	1.14492	1.42008	0.936506	0.656442	1.08167	0.724287	0.900362	1.76163	1.17704	0.792944	1.02682	0.603101	0.995309	0.98869	1.08234	1.07849	1.20731	1.09771	0.885757	0.794515	1.46282	0.999416	1.17788	1.19848	0.845296	75.59	30.08	14.0829	4.93213
P46462	Transitional endoplasmic reticulum ATPase OS=Rattus norvegicus OX=10116 GN=Vcp PE=1 SV=3 - [TERA_RAT]	4	10	18	53	0.93571	1.08893	0.733716	1.07316	1.11452	1.14576	0.991994	0.994242	0.983107	1.08513	1.00283	0.978039	0.674454	1.05875	1.06529	0.761956	1.14317	1.06018	0.805328	1.01323	1.18008	0.78533	0.983062	0.89563	0.978534	0.869622	1.06062	0.960965	1.01212	1.11177	1.08269	0.763093	1.05815	0.912499	0.942968	1.12146	200.16	22.21	89.2927	5.26221
P10860	Glutamate dehydrogenase 1, mitochondrial OS=Rattus norvegicus OX=10116 GN=Glud1 PE=1 SV=2 - [DHE3_RAT]	1	12	17	90	0.943831	1.06954	0.79759	1.14194	1.05337	0.902516	0.953477	0.783046	0.730166	1.22691	0.917683	0.816274	0.750028	1.07996	1.09129	0.697249	1.2021	1.04871	0.648984	0.896596	1.14604	0.695192	1.34269	0.933003	0.944606	0.931232	0.865186	0.894742	0.798784	0.999541	1.22625	0.695129	1.02357	0.817614	0.834939	1.29981	402.17	28.32	61.3773	8.00146
D4A720	RCG61762, isoform CRA_d OS=Rattus norvegicus OX=10116 GN=Srsf7 PE=1 SV=1 - [D4A720_RAT]	1	1	7	25	0.703767	1.16447	0.888279		2.36525	1.14805	1.46806		0.985135	1.07235	1.57508		2.99639	1.1022	1.27964		1.35019	1.20325	1.16415		3.02767	0.769935	1.21625		1.53602	1.14818	1.18747		1.60114	1.03877	1.409		0.78312	0.747613	1.10965		54.69	29.83	27.361	11.8247
P20767	Ig lambda-2 chain C region OS=Rattus norvegicus OX=10116 PE=4 SV=1 - [LAC2_RAT]	1	2	3	17	0.704669				0.665834				1.63617				1.43337				1.40802				1.52315				0.896476				2.27998				1.60541				75.47	29.81	11.3106	5.98584
Q2IBC6	Caveolin OS=Rattus norvegicus OX=10116 GN=Cav1 PE=1 SV=1 - [Q2IBC6_RAT]	2	1	6	28			1.5947				1.03331				0.904773				0.894492				0.919335				1.67105				1.47543				1.06255				0.662822		57.8267	25.28	20.5385	6.02393
Q9JKB7	Guanine deaminase OS=Rattus norvegicus OX=10116 GN=Gda PE=1 SV=1 - [Q9JKB7_RAT]	2	5	8	31	0.649146	0.984021	0.739241	1.15834	0.837715	1.18651	1.27559	0.787264	1.43315	1.16079	1.12297	0.950158	0.637227	1.34384	1.00622	1.41584	0.866587	1.1804	0.600688	0.787937	0.772208	1.58412	1.2794	0.900835	0.83723	1.27991	1.4993	1.10249	1.00427	1.51125	0.664656	0.710424	1.36866	1.24129	0.87324	0.919847	248.487	27.75	50.8687	5.71924
Q3MIE4	Synaptic vesicle membrane protein VAT-1 homolog OS=Rattus norvegicus OX=10116 GN=Vat1 PE=1 SV=1 - [VAT1_RAT]	1	2	8	21																																					125.29	20.3	43.091	6.62451
Q9Z1X1	Extended synaptotagmin-1 OS=Rattus norvegicus OX=10116 GN=Esyt1 PE=1 SV=1 - [ESYT1_RAT]	1	1	22	91	1.25161	1.12139	0.873192	0.945392	1.24482	1.02363	0.968766	0.942443	0.832773	1.22025	1.07578	1.01515	0.713276	1.1922	1.24276	0.688031	1.16613	1.19158	1.00616	0.842427	1.36944	0.800825	1.40691	1.0015	0.995377	0.931188	0.957249	0.917061	0.629626	1.08976	1.43587	0.944224	1.01459	0.85569	0.923953	1.25302	427.257	22.89	121.084	5.69385
P29418	ATP synthase subunit epsilon, mitochondrial OS=Rattus norvegicus OX=10116 GN=Atp5f1e PE=1 SV=2 - [ATP5E_RAT]	1	1	2	6																																					36.5	29.41	5.76311	10.0083
A0A0G2JSL8	Adenosine kinase OS=Rattus norvegicus OX=10116 GN=Adk PE=1 SV=1 - [A0A0G2JSL8_RAT]	3	5	7	25	0.448061	0.669359	0.734417	1.34322	1.09233	1.1972	1.05931	0.983486	0.84763	1.13757	1.43061	1.34577	0.580627	1.06701	1.60037	2.07992	1.00704	0.619672	0.791313	0.747957	0.845783	1.15207	0.975865	1.0464	1.08307	0.658414	0.882384	0.880698	0.709311	0.737058	1.01814	1.09645	1.01003	0.704409	1.30521	1.0846	118.53	18.01	40.1073	6.20166
A0A0G2JSK5	Integrin beta OS=Rattus norvegicus OX=10116 GN=Itgb1 PE=1 SV=1 - [A0A0G2JSK5_RAT]	2	12	18	174	0.998164	1.02376	1.18049	0.95238	0.925736	1.04692	0.725392	1.01609	1.25425	0.991758	0.844244	0.824578	1.39801	1.0241	0.932762	0.89677	1.00236	1.14964	1.26328	1.06233	1.1806	0.985853	0.866544	0.913961	0.806926	0.882344	1.16633	1.00608	1.1808	0.941136	1.08436	1.02954	0.756084	1.10948	1.02767	1.0316	601.438	27.19	88.2864	6.01123
A0A0G2JXJ7	Extended synaptotagmin-1 OS=Rattus norvegicus OX=10116 GN=Esyt1 PE=1 SV=1 - [A0A0G2JXJ7_RAT]	1	1	22	87		1.12552	0.942225			1.02238	1.07999			1.05835	1.00994			1.08602	1.32445			1.14172	0.945753			0.660494	1.34896			1.01668	0.925789			0.923177	1.37808			1.06266	0.923821		394.927	22.68	121.139	5.61768
Q5M9I5	Cytochrome b-c1 complex subunit 6, mitochondrial OS=Rattus norvegicus OX=10116 GN=Uqcrh PE=3 SV=1 - [QCR6_RAT]	1	2	2	11	0.745444	0.765539	1.99675	0.734338	0.617197	0.832746	1.11161	1.98123	1.77786	0.543421	0.798701	1.30096	1.61672	1.03451	0.678695	1.00789	0.774663	0.779766	1.83419	1.54496	0.611124	1.41909	0.566093	1.15072	0.651529	1.0343	1.08596	1.22671	1.61689	0.811285	0.661905	2.48416	0.693048	1.5465	1.09043	0.695435	98.1033	29.21	10.417	4.97021
G3V6P8	Guanine nucleotide-binding protein subunit gamma OS=Rattus norvegicus OX=10116 GN=Gng12 PE=1 SV=1 - [G3V6P8_RAT]	1	2	2	6	0.907332	0.867887			0.87635	1.07745			1.06219	0.816348			1.44766	1.01893			0.706628	1.01762			0.824948	1.09325			1.17938	1.0078			1.48149	0.96971			1.12838	1.00188			36.63	29.17	7.98008	8.96826
P62278	40S ribosomal protein S13 OS=Rattus norvegicus OX=10116 GN=Rps13 PE=1 SV=2 - [RS13_RAT]	2	2	6	17	1.24548	1.21136	1.57201		1.75159	0.942696	1.08717		0.881516	1.28798	1.40941		2.9304	1.02299	1.25145		0.957748	0.967194	0.825782		3.76755	0.80855	1.51347		1.39041	0.909006	1.07491		1.72235	1.16424	1.51566		0.742765	0.704908	1.05247		70.56	29.14	17.2117	10.5356
A0A0H2UHT6	40S ribosomal protein S18 OS=Rattus norvegicus OX=10116 GN=Rps18 PE=1 SV=1 - [A0A0H2UHT6_RAT]	6	2	5	16	0.757949	1.04609	1.28767		0.987736	0.962772	1.08954		0.861864	1.08716	1.26657		0.734147	0.907756	1.67714		0.771542	0.775646	0.971624		0.686475	0.858618	1.70756		1.17181	0.925952	1.06141		0.893841	0.850791	1.09379		1.16727	0.800626	1.07672		92.8005	24.5	17.5768	10.9897
P10888	Cytochrome c oxidase subunit 4 isoform 1, mitochondrial OS=Rattus norvegicus OX=10116 GN=Cox4i1 PE=1 SV=1 - [COX41_RAT]	1	3	5	26	0.904944	0.968811	0.994358	0.860749	0.78245	0.907449	1.06216	1.05481	0.962644	0.925871	0.870918	1.07338	0.654506	0.849673	1.03876	1.13327	1.13328	0.852821	0.878776	0.96366	0.831706	1.75625	0.892104	0.919925	0.995094	0.928356	0.994682	0.945187	0.91343	1.00825	0.855861	1.01813	1.01384	1.22166	1.13712	1.0061	101.522	28.99	19.5021	9.43701
D4A8T3	Coatomer protein complex, subunit zeta 1 OS=Rattus norvegicus OX=10116 GN=Copz1 PE=1 SV=1 - [D4A8T3_RAT]	1	1	4	16			1.17869	0.963605			1.05564	1.03727			1.09995	0.868296			1.05235	1.0145			0.986641	0.805502			1.25019	1.11929			0.896455	0.948955			1.27938	1.21658			0.96529	1.07433	57.51	28.81	20.1855	4.80518
P12007	Isovaleryl-CoA dehydrogenase, mitochondrial OS=Rattus norvegicus OX=10116 GN=Ivd PE=1 SV=2 - [IVD_RAT]	1	4	8	23	1.16924		0.843271	1.0053	0.980779	0.656382	1.10244		1.07562	0.972633	0.671406	2.46552	0.837752	0.815552	1.19976	0.573017	1.04903	1.09528	1.02293	0.428566	0.789018	0.999189	1.31948	0.759697	1.32723	0.689828	0.828388	0.547942	0.984526		1.0179	1.58492	1.33684	0.642085	0.969133	0.687341	133.714	20.52	46.4058	7.89893
Q63362	NADH dehydrogenase [ubiquinone] 1 alpha subcomplex subunit 5 OS=Rattus norvegicus OX=10116 GN=Ndufa5 PE=1 SV=3 - [NDUA5_RAT]	1	2	2	10	1.26672	0.859027	1.03378	0.616304	0.703108	1.00106	1.30221	1.19991	1.08377	1.00876	1.01827	0.881699	1.00078	0.815979	1.31608	1.22781	1.17382	1.02892	1.27605	0.849529	0.940549	1.21032	1.24474	1.36914	0.780088	0.992799	1.08076	0.820695	1.18409	1.00722	1.42352	1.80274	1.22101	1.52738	1.10478	0.842535	69.58	28.45	13.4033	7.43018
Q6P6G9	Heterogeneous nuclear ribonucleoprotein A1 OS=Rattus norvegicus OX=10116 GN=Hnrnpa1 PE=1 SV=1 - [Q6P6G9_RAT]	6	3	6	18	1.87926	1.00805		0.937527	1.44794	0.813619		1.17	0.873548	0.951843		1.04958	0.585417	1.01302		0.775856	1.16488	0.939207		0.92136	1.46022	0.666609		1.04986	1.33612	1.00504		1.05459	0.412433	0.899456		0.836506	0.705833	0.802675		1.00769	64.74	22.04	33.599	9.23193
B2GV06	Succinyl-CoA:3-ketoacid coenzyme A transferase 1, mitochondrial OS=Rattus norvegicus OX=10116 GN=Oxct1 PE=1 SV=1 - [SCOT1_RAT]	1	4	7	26		0.822714	1.56498	0.996471		1.00052	1.00309	0.945182		0.980704	1.04112	0.901216		0.86639	1.06069	0.868771		0.89305	1.46516	0.888494		0.828648	1.22416	1.16797		0.855917	1.02521	0.974435		0.854919	1.30904	0.899599		0.699631	0.879745	1.25277	87.7167	24.81	56.1681	8.47021
Q5BK77	Retinoic acid receptor responder (Tazarotene induced) 2 OS=Rattus norvegicus OX=10116 GN=Rarres2 PE=1 SV=1 - [Q5BK77_RAT]	1	2	4	14		0.980342	0.6832	1.28792		0.854119	0.684557	1.03294		0.866701	1.05396	0.866056		1.25059	1.14218	1.71454		0.881213	0.942273	0.905687		0.960209	0.793043	0.847686		1.18409	0.922185	1.42436		0.931366	0.693401	1.31317		0.681674	1.29722	1.42118	76.1233	28.22	18.4926	8.71924
D3ZUU6	C-type lectin domain family 3, member B OS=Rattus norvegicus OX=10116 GN=Clec3b PE=1 SV=1 - [D3ZUU6_RAT]	1	4	8	28	0.786432	0.833921	2.34404	0.830653	0.557214	0.756304	0.832147	1.13898	1.85307	0.538469	0.946895	1.34613	1.57913	0.746783	0.515114	0.874524	0.553463	0.870988	1.76874	1.33553	0.440053	0.750382	0.618867	0.941024	0.592024	1.19654	1.57382	1.40129	1.34734	0.876919	0.907955	1.82391	0.78306	1.12676	1.20404	0.834677	149.625	26.73	22.2921	5.43994
A0A0G2JWJ0	Protein phosphatase 1 regulatory subunit 12A OS=Rattus norvegicus OX=10116 GN=Ppp1r12a PE=1 SV=1 - [A0A0G2JWJ0_RAT]	5	11	23	92	1.03266	1.10053	1.86332	0.748245	0.893345	0.931456	1.06238	1.19378	1.19123	1.03892	1.08965	0.723169	2.21768	0.939615	0.845826	0.416257	0.930405	1.17135	1.69483	1.11836	1.05866	0.359542	0.907059	1.22695	0.54839	1.2513	1.00942	1.0592	1.33169	0.808243	1.26862	0.773211	0.810243	1.0592	0.899777	0.836259	309.237	25.58	115.197	5.46533
Q6PDU7	ATP synthase subunit g, mitochondrial OS=Rattus norvegicus OX=10116 GN=Atp5mg PE=1 SV=2 - [ATP5L_RAT]	1	2	2	7	1.47361		1.5722		1.32321		0.815727		0.950093		0.702977		0.848092		0.959038		1.09226		1.17044		1.3774		1.01676		1.10957		0.917174		0.708884		0.73962		0.901465		0.724852		70.86	28.16	11.4261	9.5835
P55053	Fatty acid-binding protein 5 OS=Rattus norvegicus OX=10116 GN=Fabp5 PE=1 SV=3 - [FABP5_RAT]	1	1	2	4	0.532133	0.762112	0.671646		2.51328	0.88741	1.55994		0.571763	0.855443	0.914162		1.94095	0.686268	0.8289		1.01612	0.85043	0.876115		1.71079	0.829008	0.687243		0.997946	1.08918	0.771495		0.767435	0.892325	0.675341		0.650935	0.921398	0.92235		42.97	28.15	15.0495	7.18115
P07335	Creatine kinase B-type OS=Rattus norvegicus OX=10116 GN=Ckb PE=1 SV=2 - [KCRB_RAT]	1	6	11	51	1.57309	0.948638	1.02513	0.871736	0.591419	1.19718	0.904258	0.677944	1.75203	0.778061	0.807493	1.18148	1.57147	0.869698	0.749208	1.18664	0.55615	1.24536	0.815954	0.982835	0.548968	1.01415	1.16465	1.02943	1.08001	1.11012	1.46577	0.948902	2.3815	1.24271	0.890836	1.0021	1.47503	1.04748	1.05769	0.716139	252.597	25.98	42.6983	5.66846
M0RCH6	Uncharacterized protein OS=Rattus norvegicus OX=10116 PE=1 SV=2 - [M0RCH6_RAT]	2	3	6	30	1.00851	0.83075	2.65326	0.894891	0.905403	1.0791	0.903803	1.45484	1.75086	0.706192	1.14554	1.39006	2.12122	0.975674	0.472958	0.766812	0.629449	0.968152	1.81838	1.13046	0.695491	0.883465	0.53583	1.07936	0.721937	1.19378	1.14164	1.09523	1.20223	0.857187	0.90371	2.30268	0.789169	1.54711	1.13211	0.854143	170.409	23.42	24.7966	4.99561
Q5XI77	Annexin OS=Rattus norvegicus OX=10116 GN=Anxa11 PE=1 SV=1 - [Q5XI77_RAT]	1	7	13	56	0.702886	0.953005	0.926665	1.0304	1.03775	1.06479	0.870969	1.06028	0.867989	1.15442	1.01468	0.991004	1.09169	1.12783	1.14381	1.11849	1.00061	0.994572	0.836939	0.925744	1.05819	1.24063	1.12231	0.981459	1.01157	0.96392	0.863305	0.948255	1.10462	1.06001	1.11518	1.05212	1.0881	0.878426	0.833816	1.17128	226.72	26.04	54.1258	7.6499
O35814	Stress-induced-phosphoprotein 1 OS=Rattus norvegicus OX=10116 GN=Stip1 PE=1 SV=1 - [STIP1_RAT]	1	4	13	34	0.672959				0.98092				1.98229				1.15245				0.842804				0.807114				0.672896				1.48338				0.754391				77.7929	24.31	62.5304	6.80029
F1MAB9	Tumor protein D52 OS=Rattus norvegicus OX=10116 GN=Tpd52 PE=1 SV=2 - [F1MAB9_RAT]	2	3	5	11	1.12281		1.45213	1.00997	0.660836		0.931938	1.30671	1.77823		0.99473	1.14345	1.57708		0.840513	0.844552	0.54837		1.64989	0.926939	0.622903		0.654365	1.1207	0.588436		1.17997	0.971073	1.16085		0.795824	1.835	0.908496		1.26486	0.984505	105.44	27.23	24.254	4.71631
Q68FR9	Elongation factor 1-delta OS=Rattus norvegicus OX=10116 GN=Eef1d PE=1 SV=2 - [EF1D_RAT]	1	3	6	25	1.11117	0.942644	1.39826	0.661628	0.808294	0.936652	1.01264	1.08885	1.49758	0.874242	0.96424	0.714978	1.14304	0.758547	0.71442	1.81985	0.760386	1.13422	1.70271	1.62447	0.827223	0.565636	0.682201	0.893272	0.832116	1.05389	1.11788	1.11918	1.5893	0.956033	0.914005	1.6621	0.818465	1.12483	1.01153	0.976508	118.832	24.91	31.3109	5.05908
Q641Z6	EH domain-containing protein 1 OS=Rattus norvegicus OX=10116 GN=Ehd1 PE=1 SV=1 - [EHD1_RAT]	3	3	10	29	0.997526	0.987665		0.9199	1.5684	1.13547	0.604759	1.4921	1.8748	1.16638		1.03915	1.39341	0.981332	0.735819	1.16075	1.34294	1.1902	0.904777	0.652098	1.18844	0.708335	0.855117	1.6449	0.541879	0.983578	0.843443	0.81237	1.38765	1.08644	0.635394	1.15421	1.52935	1.17275		1.33313	136.163	20.41	60.5646	6.82959
D4A5G8	Pyruvate dehydrogenase E1 component subunit alpha OS=Rattus norvegicus OX=10116 PE=1 SV=3 - [D4A5G8_RAT]	4	6	9	54	0.821467	1.17188	0.708212	0.75603	1.09631	0.922132	1.49699	1.00219	0.902192	1.04346	0.807598	1.30499	0.774249	1.0732	1.11497	0.849191	1.32354	0.986686	0.719863	0.945512	1.08012	1.94704	0.960935	0.814015	0.991853	0.95083	0.881737	0.852991	1.13208	1.33957	0.989519	0.657776	1.21333	1.0925	0.842243	1.07806	276.851	25.38	43.2467	8.19189
P62832	60S ribosomal protein L23 OS=Rattus norvegicus OX=10116 GN=Rpl23 PE=2 SV=1 - [RL23_RAT]	1	1	3	5																																					38.35	21.43	14.8561	10.5063
Q920P0	L-xylulose reductase OS=Rattus norvegicus OX=10116 GN=Dcxr PE=1 SV=1 - [DCXR_RAT]	2	3	6	19	0.741821	1.17484	0.717499	0.64742	1.74115	1.08601	0.941173	1.03239	0.689562	0.909053	0.980519	0.778889	0.735789	0.981787	1.38919	2.59162	1.19568	0.878471	0.750385	0.785342	1.30833	1.26998	0.925999	1.1744	1.18394	0.718443	0.625809	0.740626	0.580276	0.649452	0.882877	1.37816	1.35274	1.02442	0.909055	1.20309	105.05	19.67	25.7034	7.31299
Q5XI34	Protein phosphatase 2 (Formerly 2A), regulatory subunit A (PR 65), alpha isoform, isoform CRA_a OS=Rattus norvegicus OX=10116 GN=Ppp2r1a PE=1 SV=1 - [Q5XI34_RAT]	2	6	10	41	1.04121	0.991929	0.890989	1.04235	1.08959	1.07218	1.0796	1.02659	1.06868	1.05336	1.03919	0.994719	0.839563	1.09114	1.07186	0.893369	1.04042	1.12973	0.95046	0.817312	1.06735	0.803238	1.14396	1.13074	0.895195	0.90862	0.999065	0.953463	0.956881	1.02777	1.16212	1.11034	1.13263	0.965342	1.0136	1.00556	253.009	23.09	65.2809	5.10986
P22734	Catechol O-methyltransferase OS=Rattus norvegicus OX=10116 GN=Comt PE=1 SV=2 - [COMT_RAT]	1	3	5	29		0.81938		1.09193		1.23624		1.17126		1.10529		0.894551		1.04838		1.3457		0.859038		1.11838		1.05118		1.0774		0.778847		0.92864		0.874624		0.962875		0.954235		0.8788	118.425	26.89	29.5783	5.65576
Q62703	Reticulocalbin-2 OS=Rattus norvegicus OX=10116 GN=Rcn2 PE=1 SV=2 - [RCN2_RAT]	1	2	5	24			1.4989	0.877237			0.679527	1.5566			1.00457	1.25248			0.590312	0.94479			1.6408	1.29318			0.47658	1.27334			0.887725	1.01861			0.768039	2.0515			0.873482	0.721485	86.21	19.38	37.4099	4.41162
Q6PEC1	Tubulin-specific chaperone A OS=Rattus norvegicus OX=10116 GN=Tbca PE=1 SV=1 - [TBCA_RAT]	2	2	4	18	1.07135	0.695066			0.854226	0.915679			1.67353	0.627992			1.60859	0.880722			0.64825	0.82135			0.686193	1.07332			0.760257	1.00426			1.27651	0.763562			0.953428	1.06878			66.58	26.85	12.7357	5.46533
P62083	40S ribosomal protein S7 OS=Rattus norvegicus OX=10116 GN=Rps7 PE=1 SV=1 - [RS7_RAT]	1	3	6	19	1.48715	1.15081	1.05441	1.28009	1.27303	1.16682	1.3024	0.984018	1.17272	1.2931	1.3742	1.35201	0.808223	1.27872	1.11687	0.899451	1.19408	1.10985	1.09923	1.03341	1.31082	1.12089	1.1358	1.16705	1.3034	1.09175	1.15655	1.13391	0.918836	1.32714	1.3759	1.13803	1.04184	0.984983	1.22092	1.2617	70.1633	22.68	22.1133	10.0962
P00507	Aspartate aminotransferase, mitochondrial OS=Rattus norvegicus OX=10116 GN=Got2 PE=1 SV=2 - [AATM_RAT]	1	6	10	41	1.00877	1.11667	1.01538	1.22597	1.20185	1.14687	0.887882	0.754195	0.825331	1.11628	0.914824	1.05811	1.1069	0.990173	0.996051	1.00346	0.828296	0.919992	0.711238	0.946709	0.863988	0.942706	1.36149	1.07448	0.932972	1.59935	0.956647	0.933612	0.795024	0.841096	1.20058	0.883567	1.26222	1.28682	0.985935	1.20581	210.528	26.74	47.2841	8.99756
Q6P7A7	Dolichyl-diphosphooligosaccharide--protein glycosyltransferase subunit 1 OS=Rattus norvegicus OX=10116 GN=Rpn1 PE=1 SV=1 - [Q6P7A7_RAT]	2	5	13	41	0.620304	1.19057	0.801562	1.31392	1.57912	0.920664	1.07438	0.797578	0.630785	1.19697	1.03244	0.79628	2.28448	1.08532	1.0611	0.62562	0.779917	0.965971	0.684399	0.980913	2.91743	0.767228	1.35378	0.934914	1.00154	0.808216	0.968386	1.00938	1.24381	1.23491	1.26852	0.520502	0.680709	0.874671	1.00442	1.32153	148.96	18.32	68.3586	6.50732
D3ZBN0	Histone H1.5 OS=Rattus norvegicus OX=10116 GN=Hist1h1b PE=1 SV=1 - [H15_RAT]	1	1	6	29				1.01402				1.08016				1.21426				0.62454				1.20147				1.14416				1.25235				1.06768				0.907337	90.1993	26.58	22.6355	10.9604
Q01177	Plasminogen OS=Rattus norvegicus OX=10116 GN=Plg PE=2 SV=2 - [PLMN_RAT]	3	9	18	101	1.26624	0.814641	1.11235	1.07718	1.28185	0.821836	1.10085	1.07683	0.881819	0.767355	1.08981	2.03899	1.30971	0.715013	0.849888	0.974207	1.48691	0.96991	1.3837	1.32194	1.29628	0.803293	0.667497	0.866769	1.16011	1.24393	1.18364	1.14945	1.03036	0.77723	0.756407	1.19799	0.85602	0.853116	1.20276	0.945571	378.89	23.4	90.4769	7.07861
Q9EQS0	Transaldolase OS=Rattus norvegicus OX=10116 GN=Taldo1 PE=1 SV=2 - [TALDO_RAT]	1	4	8	30	0.696588	0.823726	0.848123	1.10774	1.31816	1.0984	1.55112	0.911355	1.10117	1.2537	1.2675	1.25421	0.577401	0.935789	1.02331	1.12853	0.9055	0.87566	0.674519	0.795309	0.778895	1.14018	0.979074	0.837734	0.927257	0.963977	1.0143	0.953077	0.960245	1.0918	0.973459	0.975626	1.24364	0.830897	1.17265	1.05946	114.401	23.44	37.4365	7.03467
P19132	Ferritin heavy chain OS=Rattus norvegicus OX=10116 GN=Fth1 PE=1 SV=3 - [FRIH_RAT]	2	2	3	11	0.720051	0.877198	0.714541		1.524	1.16472	1.31977		1.0733	1.54066	0.870142		1.50734	1.27307	0.716386		0.843743	1.13396	0.752483		1.0443	1.40808	0.656988		1.25983	1.75327	1.12574		1.21957	1.49476	0.642108		0.82711	2.0429	0.789854		62.77	26.37	21.1133	6.30322
Q99J82	Integrin-linked protein kinase OS=Rattus norvegicus OX=10116 GN=Ilk PE=2 SV=1 - [ILK_RAT]	1	4	12	79	0.876805	1.2595	0.957111	1.0047	1.19412	0.988292	0.956457	0.99539	0.700299	1.24148	1.32942	0.657953	0.880955	0.928762	1.09299	0.362258	1.29283	1.39464	0.906805	0.988561	1.52027	0.3821	1.43811	1.09506	0.859603	0.935556	0.75823	0.99475	0.905359	1.18441	1.69684	0.714388	0.885807	1.15678	0.920862	1.24532	143.198	21.68	51.3399	8.07471
P27274	CD59 glycoprotein OS=Rattus norvegicus OX=10116 GN=Cd59 PE=1 SV=2 - [CD59_RAT]	1	3	4	30	0.586365	0.861804	1.74303	0.796868	0.978277	0.942341	0.852441	0.683039	1.32185	0.753573	0.968	0.93926	0.412788	0.917526	0.91004	1.41811	0.787528	0.809071	0.754489	0.833395	0.849314	1.28927	1.45691	0.713681	0.59434	1.15975	1.10583	1.38545	1.028	1.06493	1.65494	0.956729	1.40351	0.676462	1.03255	0.930167	133.618	26.19	13.781	8.48486
A0A0G2K477	Uncharacterized protein OS=Rattus norvegicus OX=10116 PE=4 SV=1 - [A0A0G2K477_RAT]	2	4	8	100	0.911478	0.723073	0.379691	0.972766	0.712346	0.337173	0.781512	0.576964	1.54628	1.03944	0.72503	0.983239	0.596812	1.27864	1.13954	0.971958	1.2887	1.22764	0.710419	1.39987	1.23932	2.03767	0.789641	0.977868	0.809476	1.3491	0.891373	0.589822	0.913274	1.37501	0.545026	0.852552	2.13507	0.920703	0.629053	1.03619	416.137	26.18	51.1043	7.73779
P23457	3-alpha-hydroxysteroid dehydrogenase OS=Rattus norvegicus OX=10116 GN=Akr1c9 PE=1 SV=1 - [DIDH_RAT]	1	1	5	12		0.769337	0.737496	0.332086		1.83002	0.752049	0.876405		1.92486	0.757837	0.58324		1.19365	0.830624	2.09909		1.17019	0.670554	0.572967		1.16823	0.684782	1.00287		1.24221	0.751565	0.71914		1.27456	0.482453	0.969159		1.5497	0.698919	0.659364	59.72	17.08	37.0039	7.09326
Q9Z2J4	Nexilin OS=Rattus norvegicus OX=10116 GN=Nexn PE=1 SV=1 - [NEXN_RAT]	2	6	17	68	0.914137	0.995807	1.81343	0.825373	0.790843	0.886664	0.940867	1.16549	1.58402	0.660982	1.04454	1.05443	1.58333	0.778335	0.48813	0.653432	0.769843	1.01057	1.85032	1.40988	0.847098	0.44763	0.588773	1.00861	0.646283	1.18265	1.06182	1.1077	1.61755	0.921765	0.964678	1.13078	0.658882	1.02557	1.06922	0.807195	153.452	21.34	78.3453	5.36377
Q5RKJ9	RAB10, member RAS oncogene family OS=Rattus norvegicus OX=10116 GN=Rab10 PE=1 SV=1 - [Q5RKJ9_RAT]	27	2	6	29	0.945336	1.04374	0.648363	1.19458	1.13631	0.947297	1.02496	1.06678	0.799127	1.14387	0.934014	0.735848	0.567415	1.08134	1.2651	1.49255	1.14442	0.998204	0.706888	0.845603	1.19592	1.02408	1.25346	1.14811	1.05139	0.776215	0.845914	0.931506	0.78343	0.95566	1.16098	1.24803	1.33744	0.789379	0.957033	1.44198	172.244	26	22.5266	8.38232
P12785	Fatty acid synthase OS=Rattus norvegicus OX=10116 GN=Fasn PE=1 SV=3 - [FAS_RAT]	1	18	43	118	0.695405	1.07316	0.683622	0.508916	1.30567	0.961348	2.52988	1.54659	0.80289	1.96706	1.09186	1.11304	0.758708	0.803495	1.20123	1.92917	0.963743	0.850081	0.476066	0.66176	0.682131	1.10434	0.843978	0.938703	0.963352	0.99157	1.06711	0.876838	1.1067	1.25095	0.713622	1.1497	1.41167	0.865621	0.807433	0.920063	420.523	18.24	272.478	6.39209
P18420	Proteasome subunit alpha type-1 OS=Rattus norvegicus OX=10116 GN=Psma1 PE=1 SV=2 - [PSA1_RAT]	1	3	5	14	1.1329	0.861225	1.37587	1.07975	0.93678	0.818472	0.965859	1.16862	1.04746	1.06766	0.955218	1.10922	1.32294	0.850263	1.12469	0.675301	0.8905	1.11493	1.20065	1.23975	0.850472	0.788908	1.15118	1.22559	0.798525	0.853303	1.05634	1.02921	1.11756	1.02436	1.08013	0.993546	1.01009	0.944697	0.787535	1.08784	74.2618	25.86	29.4988	6.60986
P50115	Protein S100-A8 OS=Rattus norvegicus OX=10116 GN=S100a8 PE=1 SV=3 - [S10A8_RAT]	1	1	2	21	0.726096		0.916462	2.64366	1.79236		1.11248	1.01939	0.493587		0.78917	1.78119	2.11274		0.902267	0.959609	1.32765		1.14472	1.28052	1.69054		0.679111	1.0391	2.33434		1.80464	1.43895	0.80949		0.712349	3.15148	0.836851		1.18579	0.809749	53.91	25.84	10.2321	6.04932
A0A0G2JU43	Dynein light chain OS=Rattus norvegicus OX=10116 GN=LOC100361920 PE=3 SV=1 - [A0A0G2JU43_RAT]	3	1	2	4	0.719377				1.0826				0.695701				0.847237				1.37743				1.54828				0.613686				0.937039				0.746076				31.13	25.84	10.4963	7.40088
D3ZZR9	Peptidylprolyl isomerase OS=Rattus norvegicus OX=10116 GN=Fkbp2 PE=1 SV=1 - [D3ZZR9_RAT]	1	2	4	12	1.26683	0.735068	0.91022		0.916651	0.997698	0.767962		1.59914	0.973863	0.671044		1.30491	0.954045	0.970348		0.762159	0.883904	1.64356		0.875165	1.23034	0.665664		0.842328	0.976126	0.936762		1.30645	0.777187	0.677658		1.22639	0.965884	1.13943		42.0467	25.71	15.3782	8.88037
P61980	Heterogeneous nuclear ribonucleoprotein K OS=Rattus norvegicus OX=10116 GN=Hnrnpk PE=1 SV=1 - [HNRPK_RAT]	3	10	12	97	1.29237	0.988537	0.924037	1.01628	0.978485	1.09605	0.925936	1.13371	1.24053	1.00763	1.01689	0.995033	1.01729	0.991985	1.1412	0.815955	0.906523	1.01112	1.16625	1.0325	0.896109	0.686787	0.887767	1.07074	0.902033	0.939062	1.18097	1.15964	1.06403	0.939578	1.00858	0.970142	1.04842	1.10822	1.17302	1.07364	468.83	23.54	50.9444	5.5415
Q6P9V7	Proteasome (Prosome, macropain) activator subunit 1 OS=Rattus norvegicus OX=10116 GN=Psme1 PE=1 SV=1 - [Q6P9V7_RAT]	3	6	7	31	1.11173	0.858337	1.23596	1.02221	0.664182	0.859886	0.863093	1.07577	1.2501	0.95991	1.25163	0.995166	0.79171	0.805266	0.753308	1.087	0.580288	0.880844	0.975834	1.11565	0.665501	0.935379	0.709178	0.995909	0.680229	0.944257	1.36868	0.972414	1.24639	0.782534	0.857597	1.65658	0.724319	1.30251	1.3	0.98373	255.023	21.29	28.617	5.80811
P40241	CD9 antigen OS=Rattus norvegicus OX=10116 GN=Cd9 PE=1 SV=2 - [CD9_RAT]	1	2	4	48	1.3047	1.03698	1.10377	0.935532	1.15872	0.900599	0.788894	1.03808	0.981637	1.02196	0.702993	0.70487	1.26063	1.06127	1.13278	1.41297	0.995825	1.01832	1.34442	0.702546	0.935053	1.32745	1.0289	0.978598	0.796832	1.1085	0.849512	0.753552	0.706672	0.652496	0.733234	0.972974	1.23084	0.975229	0.718552	1.11209	181.44	25.66	25.1979	7.26904
Q9QX79	Fetuin-B OS=Rattus norvegicus OX=10116 GN=Fetub PE=2 SV=2 - [FETUB_RAT]	2	5	10	104	0.77957	0.854197	1.08851	0.787895	1.37878	0.910366	1.365	0.745358	0.711481	1.08989	0.86474	2.26584	1.26278	0.91666	0.539284	1.13111	0.820059	0.858772	0.903419	0.830142	0.869253	1.55442	0.415916	0.519517	1.04489	1.46994	1.11536	1.0733	0.939555	1.03039	0.667021	1.12926	0.744233	1.67767	1.13062	0.789501	339.345	22.75	41.5359	7.09326
Q68FP1	Gelsolin OS=Rattus norvegicus OX=10116 GN=Gsn PE=1 SV=1 - [GELS_RAT]	1	15	17	112	0.866732	1.27891	0.485886	0.910703	0.719311	1.05457	0.862534	0.963863	0.835518	1.07346	1.22082	0.950076	1.08906	1.15306	1.28718	1.18009	0.746904	1.31808	0.509312	1.06538	0.849184	0.894516	1.13883	1.0155	1.13504	1.25713	1.20206	0.974324	1.32847	1.33599	1.10254	0.829108	0.901509	1.11129	1.32937	1.1067	437.473	24.36	86.0141	6.0874
Q6Q0N1	Cytosolic non-specific dipeptidase OS=Rattus norvegicus OX=10116 GN=Cndp2 PE=1 SV=1 - [CNDP2_RAT]	1	3	7	13			0.986333	1.28706			0.982854	0.978394			1.12429	1.2285			1.13497	1.55944			1.08576	1.1686			0.994862	1.07229			0.971416	1.50475			1.08682	0.685764			1.2395	1.67434	84.4	21.05	52.6596	5.65576
Q6IRJ7	Annexin OS=Rattus norvegicus OX=10116 GN=Anxa7 PE=1 SV=1 - [Q6IRJ7_RAT]	1	7	11	51	0.860595	1.14077	0.814307	1.17195	1.19359	1.11784	0.944547	0.869998	0.914934	1.13864	0.947815	1.09701	1.01852	1.13508	0.952164	1.44084	1.10459	1.0769	0.808876	0.826356	1.07252	1.29091	1.1346	0.981065	1.14232	1.0438	0.853767	0.947416	0.80795	1.06974	1.17486	1.04182	1.19595	0.840929	0.897619	1.26105	280.745	19.65	49.9873	6.17627
P02767	Transthyretin OS=Rattus norvegicus OX=10116 GN=Ttr PE=1 SV=1 - [TTHY_RAT]	1	2	4	54	0.849428	0.460424	1.63615	0.797779	0.394014	0.84407	1.72333	1.25287	1.4643	0.457959	1.10287	2.55113	1.18982	0.654252	0.586929	0.963938	0.341623	0.828008	1.61223	1.76868	0.404659	0.86892	0.476757	0.932141	0.499288	0.919386	1.35189	1.40022	0.976969	0.677509	0.695584	1.73768	0.71275	1.00541	1.42628	0.737019	446.12	25.17	15.7099	6.16357
Q07009	Calpain-2 catalytic subunit OS=Rattus norvegicus OX=10116 GN=Capn2 PE=1 SV=3 - [CAN2_RAT]	1	7	13	76	1.65921	1.133	1.02877	1.04961	1.14163	0.984505	0.93859	0.923767	0.829364	1.10614	0.985717	0.96975	0.876381	1.16038	1.10131	1.06659	1.40718	1.08533	0.999804	0.93254	1.49334	0.787878	1.28027	1.17019	1.04666	1.08877	0.970054	0.955162	0.868598	1.04268	1.28804	1.6567	1.0723	0.927687	0.905389	1.14509	201.104	23.43	79.8688	4.95752
Q6P2A5	GTP:AMP phosphotransferase AK3, mitochondrial OS=Rattus norvegicus OX=10116 GN=Ak3 PE=1 SV=1 - [Q6P2A5_RAT]	2	5	6	17	1.26609	0.989699	1.22767	1.09578	1.38821	1.05608	0.970194	1.34	0.801027	0.897208	0.953883	1.2297	1.82521	0.970443	1.03934	1.22441	1.33754	0.865867	1.3053	1.0309	1.65412	1.01822	0.972216	1.03982	1.13988	0.913099	0.997339	0.902656	1.14261	0.885638	1.05686	1.50763	1.06289	0.989043	1.15704	1.08441	80.38	17.62	25.4785	8.85107
G3V734	2,4-dienoyl CoA reductase 1, mitochondrial, isoform CRA_a OS=Rattus norvegicus OX=10116 GN=Decr1 PE=1 SV=1 - [G3V734_RAT]	2	3	9	39	0.855735	1.06511	0.481735	0.921274	0.813564	0.849773	1.41719	1.08171	0.936543	0.827182	0.776816	1.23958	0.559408	0.936084	1.4569	1.53318	1.50542	0.750345	0.50743	0.999818	0.739088	2.00422	1.12207	1.00518	1.08419	0.841077	0.794497	0.860531	0.825313	1.11216	0.574743	0.679049	1.12209	1.09428	1.08347	0.893253	124.241	24.18	36.1097	8.93896
P62828	GTP-binding nuclear protein Ran OS=Rattus norvegicus OX=10116 GN=Ran PE=1 SV=3 - [RAN_RAT]	3	2	4	19	1.01656	0.931366	0.677872	1.10739	1.04128	1.00912	1.2385	0.888269	1.02461	1.19684	0.97504	1.24626	1.5605	0.950487	1.2187	1.25298	1.0863	0.94948	0.752302	0.92586	1.09537	1.13641	1.06673	1.01178	1.06916	0.882836	0.962928	0.96225	1.76844	1.00144	1.02517	0.956515	1.02679	0.814544	1.16271	1.07174	118.221	25	24.4076	7.48877
P16975	SPARC OS=Rattus norvegicus OX=10116 GN=Sparc PE=1 SV=4 - [SPRC_RAT]	1	4	6	35	1.48776		2.7924	1.48784	0.999739		0.878142	1.01356	0.85919		1.02178	0.786376	1.42739		0.555785	1.11858	1.04245		2.11724	1.95015	0.876403		0.607811	0.722404	1.14587		1.30725	1.25085	1.20127		0.879843	1.73828	0.746974		1.11039	1.08494	120.441	24.92	34.2735	4.89404
F1M013	60S ribosomal protein L7a OS=Rattus norvegicus OX=10116 GN=Rpl7a PE=4 SV=2 - [F1M013_RAT]	11	2	5	17	0.825724	1.12471	1.02433	1.0805	0.885167	0.93838	1.25411	0.888732	0.756297	1.14364	0.956541	1.00021	0.606111	0.984892	1.25343	0.558863	1.1602	1.15373	0.731659	1.0946	1.22439	0.654837	1.72401	1.19967	0.678274	0.865867	0.857004	1.01468	0.719849	1.11014	1.65182	0.706174	0.916269	0.915731	0.83837	1.17988	82.5467	17.36	29.846	10.6089
A0A0G2K7X0	Acidic leucine-rich nuclear phosphoprotein 32 family member A OS=Rattus norvegicus OX=10116 GN=Anp32a PE=1 SV=1 - [A0A0G2K7X0_RAT]	3	1	4	11		1.00218				1.38696				0.997575				0.925464				1.05034				1.20285				0.883026				1.14552				1.05099			43.05	21.4	26.3001	4.00537
F1LNF7	Isocitrate dehydrogenase [NAD] subunit, mitochondrial OS=Rattus norvegicus OX=10116 GN=Idh3a PE=1 SV=2 - [F1LNF7_RAT]	2	3	8	28	1.08239	0.94005	0.877164	0.402385	0.808053	0.909643	1.09499	1.39923	1.517	0.829111	0.824154	0.729398	1.04744	1.01399	0.920255	2.46135	1.2584	1.02595	0.918666	0.878499	0.800614	1.53192	0.802936	1.27627	1.09029	0.959542	0.956018	0.923652	1.35716	1.19344	0.66967	1.4031	1.25507	1.25986	0.89509	0.858657	101.456	21.99	41.1499	6.93213
C0KUC5	LIM and senescent cell antigen-like-containing domain protein OS=Rattus norvegicus OX=10116 GN=Lims1 PE=1 SV=1 - [C0KUC5_RAT]	2	2	7	18			0.992395				1.00134				1.1963				0.94523				0.913393				1.48696				0.948797				1.54074				1.0656		70.42	12.98	41.5811	8.04541
O35567	Bifunctional purine biosynthesis protein PURH OS=Rattus norvegicus OX=10116 GN=Atic PE=1 SV=2 - [PUR9_RAT]	1	4	8	26			0.752195	1.28993			0.99196	0.80433			1.11107	1.10959			1.38057	1.29304			0.645586	0.84117			1.24698	0.920487			0.833866	0.950208			1.16325	0.995345			1.01802	1.21572	128.293	18.41	64.1682	7.13721
Q60587	Trifunctional enzyme subunit beta, mitochondrial OS=Rattus norvegicus OX=10116 GN=Hadhb PE=1 SV=1 - [ECHB_RAT]	2	5	8	58	0.78667	1.18708	0.523832	0.931457	1.01558	0.935559	1.22583	0.979577	0.862198	1.00437	0.752434	1.20858	0.750735	0.933825	1.27333	1.23537	1.37785	0.958686	0.491088	1.17341	0.91537	1.84801	1.16511	1.09571	1.08088	1.03194	0.819977	0.873636	0.771085	1.03195	0.886719	1.11758	1.18617	0.858389	0.944047	1.12402	194.958	18.95	51.3815	9.46631
Q5M878	Serum amyloid A protein OS=Rattus norvegicus OX=10116 GN=Saa4 PE=1 SV=1 - [Q5M878_RAT]	2	3	3	18	1.1855	0.991608	1.01002	1.34013	1.18764	0.899133	0.806164	0.929273	0.92692	0.602575	1.27759	1.28865	1.77896	1.05614	0.987033	1.50844	1.6421	1.24427	1.38975	1.32084	1.5415	1.58351	1.05467	0.547846	1.74243	1.783	1.68448	1.07709	0.981235	0.799885	0.698146	2.19221	0.757429	1.30514	1.52568	0.725714	70.2	24.62	14.9634	9.1001
Q71SY3	Translin OS=Rattus norvegicus OX=10116 GN=Tsn PE=1 SV=1 - [Q71SY3_RAT]	3	1	4	13			1.40544				1.02592				1.29047				0.958815				0.911346				1.1663				0.942344				1.26561				1.2893		50.4533	24.56	26.1547	6.44287
A0A0G2JUY4	Uncharacterized protein OS=Rattus norvegicus OX=10116 PE=1 SV=1 - [A0A0G2JUY4_RAT]	10	2	2	8	0.251672	0.806722	0.262167	2.15317	0.202154	1.15719	1.01631	0.465207	1.93118	1.00041	0.938475	0.967196	0.1648	0.421586	0.747649	0.779588	2.69915	1.01153	0.4321	0.401989	2.32111	1.60352	0.568549	0.480897	0.198899	1.21843	0.685769	0.834988	1.14795	2.67403	0.804335	0.173349	2.80712	0.501472	0.306182	0.423419	90.25	24.55	12.412	8.41162
P29975	Aquaporin-1 OS=Rattus norvegicus OX=10116 GN=Aqp1 PE=1 SV=4 - [AQP1_RAT]	2	2	3	7			0.659198	1.3018			0.943815	0.920761			1.11691	0.914467			1.10972	1.77746			0.460113	0.816938			1.09911	0.753045			0.746155	0.808531			1.53641	0.759304			1.1768	1.40143	51.02	14.87	28.8383	7.82568
B0BNN4	Complement factor properdin OS=Rattus norvegicus OX=10116 GN=Cfp PE=1 SV=1 - [B0BNN4_RAT]	1	4	7	26	1.48105	1.08422	1.91972	1.1207	0.463737	0.428102	0.748499	0.820879	1.11413	0.417811	1.1156	0.945199	1.82753	0.590476	0.805568	0.653388	0.85161	1.1415	0.922176	1.27049	1.12536	0.480121	0.951229	0.912316	1.21917	1.92279	1.32314	0.96033	0.709699	0.774348	1.02229	1.6611	0.905789	1.11629	1.18659	0.754322	110.49	24.52	50.5386	7.89893
P63029	Translationally-controlled tumor protein OS=Rattus norvegicus OX=10116 GN=Tpt1 PE=1 SV=1 - [TCTP_RAT]	1	2	4	12				1.01701				1.36507				1.02384				1.02528				1.08968				1.22093				1.24756				1.05442				0.783581	93.42	24.42	19.4496	4.85596
F1M865	Sorbin and SH3 domain-containing protein 1 OS=Rattus norvegicus OX=10116 GN=Sorbs1 PE=1 SV=1 - [F1M865_RAT]	6	6	15	49	1.27626	0.855329	1.77654	0.83966	1.17608	0.932546	1.06145	1.11307	0.869718	0.727159	0.964488	0.821785	1.68041	0.704844	0.631859	0.412298	2.03102	1.13279	1.99189	1.45612	1.82149	0.600945	0.708693	1.18127	1.15178	0.974783	1.02329	1.27152	1.35272	0.870808	1.13109	0.906474	0.639088	1.63994	0.907039	0.831875	240.25	20.27	83.0009	7.63525
Q920L2	Succinate dehydrogenase [ubiquinone] flavoprotein subunit, mitochondrial OS=Rattus norvegicus OX=10116 GN=Sdha PE=1 SV=1 - [SDHA_RAT]	1	6	13	68	0.599006	1.07012	0.537004	1.01087	1.25426	0.895962	1.23588	1.01036	0.72515	1.03782	0.805302	1.07578	0.533182	1.06059	1.39419	1.1682	1.48657	0.887765	0.586776	0.835809	1.12373	1.53659	1.14071	0.939155	1.21149	0.817147	0.846734	0.837645	0.826288	1.21517	1.14007	0.897027	1.07795	0.760244	1.07178	1.35271	393.15	19.05	71.5697	7.1665
P17559	Uteroglobin OS=Rattus norvegicus OX=10116 GN=Scgb1a1 PE=1 SV=2 - [UTER_RAT]	1	2	3	19	0.684146	0.849676	1.29477	0.628563	0.721835	1.57966	3.72581	1.89989	2.52109	0.709855	0.216769	2.13403	2.741	0.95007	0.414192	1.0927	0.450447	1.10296	0.717899	0.85332	0.424958	1.57453	0.334216	1.13341	0.669197	0.823791	0.92075	0.903709	0.699077	0.76733	0.334002	3.70087	0.713932	1.12002	1.72273	0.658667	87.1533	23.96	10.4425	5.0083
Q68FS4	Cytosol aminopeptidase OS=Rattus norvegicus OX=10116 GN=Lap3 PE=1 SV=1 - [AMPL_RAT]	1	5	9	26	1.02509	0.927649	0.731624	1.24407	1.07216	1.031	0.932481	0.917427	0.937027	1.12187	0.970382	0.913474	0.750875	1.07399	1.27297	1.18326	1.06773	0.976979	0.645133	1.02108	0.875394	1.20326	1.20123	0.987918	1.0057	0.89833	0.857088	0.839988	0.826315	1.01622	0.8749	0.800308	1.20616	0.94415	0.901857	1.00872	104.777	14.26	56.1147	7.21045
P00502	Glutathione S-transferase alpha-1 OS=Rattus norvegicus OX=10116 GN=Gsta1 PE=1 SV=3 - [GSTA1_RAT]	4	1	6	26																																					118.683	20.72	25.5906	8.79248
Q925G0	RNA-binding protein 3 OS=Rattus norvegicus OX=10116 GN=Rbm3 PE=1 SV=2 - [RBM3_RAT]	1	1	3	9	0.735103	0.761522	1.60153	1.06652	0.743394	0.904174	0.872017	1.75128	1.43418	0.565108	1.13696	1.56672	1.4446	0.896094	0.554003	1.15518	0.729659	0.900291	1.69141	1.18896	0.875608	1.11015	0.628652	0.93203	0.649957	1.00623	0.937837	1.3528	0.930289	0.705856	0.907972	1.93879	0.699161	1.17868	1.28215	1.08064	53.92	23.87	16.8448	7.57666
D3ZAF6	ATP synthase subunit f, mitochondrial OS=Rattus norvegicus OX=10116 GN=Atp5mf PE=1 SV=1 - [ATPK_RAT]	1	1	2	22	1.02475	1.00179	1.37344	1.04731	1.17529	1.07639	0.97988	1.03522	0.945645	1.04127	0.787322	0.905941	0.838133	1.03271	1.10021	1.11019	1.1134	1.03087	1.02584	0.881903	1.1546	1.19421	0.937887	0.992766	0.908293	0.849004	0.775007	0.79443	0.939238	0.954168	0.987508	1.10737	1.08646	0.857895	0.903284	1.1422	94.2433	23.86	10.4456	10.0376
O08557	N(G),N(G)-dimethylarginine dimethylaminohydrolase 1 OS=Rattus norvegicus OX=10116 GN=Ddah1 PE=1 SV=3 - [DDAH1_RAT]	1	3	6	27	1.195	0.776746	0.821023	0.995763	1.42436	1.1342	0.886878	1.35061	1.15947	0.862125	1.15151	0.893061	0.539877	1.12413	1.10296	1.64267	0.797066	0.661955	1.5843	1.17728	0.726532	1.4484	0.684083	0.924662	0.723121	0.632515	0.811531	0.936854	0.688843	0.740783	1.09118	0.975322	1.22471	0.998975	1.25939	1.37934	190.355	22.46	31.4059	6.12549
A0A0G2K8B7	Eukaryotic initiation factor 4A-II OS=Rattus norvegicus OX=10116 GN=Eif4a2 PE=1 SV=1 - [A0A0G2K8B7_RAT]	3	4	6	40	0.665645	0.860656	0.869628	1.02552	1.89619	1.09505	1.01238	0.966655	0.691551	0.983755	1.03866	1.05037	2.49412	1.25895	1.06687	0.975238	1.00508	0.977561	0.866592	0.845885	3.01654	1.00452	1.21178	1.08089	1.58188	1.09125	1.03843	0.832916	1.45749	1.00949	0.955696	1.02933	0.763321	1.18116	0.953126	0.902078	123.68	23.76	41.2642	5.64307
Q66HK3	Prostaglandin G/H synthase 1 OS=Rattus norvegicus OX=10116 GN=Ptgs1 PE=1 SV=1 - [Q66HK3_RAT]	2	4	11	39	1.1294	0.916121	1.20145	1.31996	1.02218	1.01666	0.905623	0.597663	0.724212	1.11093	0.993872	1.24684	0.894992	0.869448	0.889995	1.03931	1.17293	1.11132	0.775702	0.8984	0.802466	0.994519	1.48142	1.29773	0.787639	0.670978	1.06902	0.851646	0.722488	0.833739	1.54877	0.809838	1.28184	0.527321	0.78185	1.30289	134.47	18.94	69.0018	6.69775
P48199	C-reactive protein OS=Rattus norvegicus OX=10116 GN=Crp PE=1 SV=1 - [CRP_RAT]	2	2	4	32	0.731316	0.926068	0.443092	1.13975	1.05004	0.913144	1.61614	0.638165	1.61408	1.12004	1.28841	2.43756	0.930379	0.955047	0.585178	1.9111	0.827163	0.830464	0.654301	0.952925	1.07863	1.45206	0.550536	0.611442	1.00323	1.05684	1.27297	1.09392	1.34547	0.702929	0.649445	0.908333	0.994925	0.651675	1.47439	0.843903	278.673	19.13	25.4517	4.99561
D3ZCR3	High mobility group protein B1 pseudogene OS=Rattus norvegicus OX=10116 GN=LOC108349189 PE=4 SV=2 - [D3ZCR3_RAT]	13	3	5	20	1.02736	0.878196	0.773135		0.985577	1.30665	1.05577		1.97385	1.06944	1.17913		1.04958	1.0401	0.958453		0.743616	1.02934	1.14199		0.766557	1.02508	1.24989		1.21878	0.871602	0.983853		1.12416	0.905184	1.15865		1.01215	0.7808	1.12035		71.93	19.72	24.6621	6.15088
B0K031	60S ribosomal protein L7 OS=Rattus norvegicus OX=10116 GN=Rpl7 PE=1 SV=1 - [B0K031_RAT]	3	2	4	20	0.363613			1.33208	0.894199			0.991845	0.712725			0.667852	0.259924			0.366063	1.28673			1.1861	0.757865			1.28767	1.08534			1.14329	0.800504			0.21491	0.907874			1.08206	94.74	19.23	30.294	10.8726
Q6PDV7	60S ribosomal protein L10 OS=Rattus norvegicus OX=10116 GN=Rpl10 PE=1 SV=3 - [RL10_RAT]	2	1	3	4			1.63057				1.09812				1.05688				1.06935				1.71643				1.45473				1.11022				1.20019				0.911321		36.84	19.16	24.5879	10.0815
Q63228	Glia maturation factor beta OS=Rattus norvegicus OX=10116 GN=Gmfb PE=1 SV=2 - [GMFB_RAT]	1	1	2	5																																					39.15	18.31	16.7255	5.43994
B2RZ72	Actin-related protein 2/3 complex subunit 4 OS=Rattus norvegicus OX=10116 GN=Arpc4 PE=1 SV=1 - [B2RZ72_RAT]	1	1	5	25	0.658198			1.01875	1.23787			0.920508	1.12476			0.9136	0.845205			0.567071	1.06211			0.849635	0.848525			1.09589	0.859543			0.942174	1.02919			1.09601	1.05171			1.06914	42.06	23.21	19.6543	8.42627
Q3T1K5	F-actin-capping protein subunit alpha-2 OS=Rattus norvegicus OX=10116 GN=Capza2 PE=1 SV=1 - [CAZA2_RAT]	1	2	4	16	1.1503		1.00733	0.577454	1.54589	1.42027	0.957216	1.0782	1.25918	1.67166	0.991281	0.704437	2.19128	1.74932	1.02904	2.85962	0.984604	1.76707	0.963332	0.956366	1.97153		0.871183	1.30797	1.26746		1.06113	1.09957	1.45731		1.1127	1.93937	1.20442	1.67135	0.985379	1.0754	120.17	19.58	32.9466	5.84619
D3ZTH8	Similar to 60S ribosomal protein L23a OS=Rattus norvegicus OX=10116 GN=LOC689899 PE=3 SV=1 - [D3ZTH8_RAT]	9	1	3	3			1.54678				1.3105				0.872046				0.895477				0.983483				1.19428				1.06395				1.18376				0.818259		31.9	23.08	17.7421	10.3892
Q4QQV0	Tubulin beta chain OS=Rattus norvegicus OX=10116 GN=Tubb6 PE=1 SV=1 - [Q4QQV0_RAT]	2	1	9	116	1.07217				1.02138				1.21407				0.719394				1.18031				1.14468				0.646169				1.83989				1.09038				272.088	19.69	50.0271	4.89404
A0A0G2K588	Latent-transforming growth factor beta-binding protein 4 OS=Rattus norvegicus OX=10116 GN=Ltbp4 PE=1 SV=1 - [A0A0G2K588_RAT]	2	25	33	210	1.1023	0.673509	2.21391	0.915648	0.818004	1.08249	0.862595	1.68666	1.05976	0.644962	0.943452	1.2723	1.49718	0.797264	0.588732	0.667436	0.67861	0.845503	2.45376	1.3284	0.649014	0.841995	0.394814	1.15352	0.808265	1.02297	0.959587	1.02906	1.11199	0.837282	0.7783	2.38469	0.613612	1.5031	1.12106	0.770152	848.248	20.38	153.907	4.93213
A0A0G2K7W6	Similar to 60S ribosomal protein L27a OS=Rattus norvegicus OX=10116 GN=RGD1562402 PE=3 SV=1 - [A0A0G2K7W6_RAT]	4	2	2	4			1.15749				1.27936				0.876832				1.25619				1.17654				1.33483				0.990467				1.35533				0.896226		59.91	22.97	16.5771	10.9897
Q5RJZ6	Short coiled-coil protein OS=Rattus norvegicus OX=10116 GN=Scoc PE=2 SV=1 - [SCOC_RAT]	1	1	2	6	0.829405		1.59794		0.470968		0.917875		1.41564		0.686205		1.47079		0.647347		0.458963		1.54004		0.545712		1.08362		0.875559		0.759729		1.51466		1.06651		0.82513		0.868557		61.77	22.95	13.6807	4.65283
X1WI37	40S ribosomal protein S4 OS=Rattus norvegicus OX=10116 GN=Rps4x PE=3 SV=1 - [X1WI37_RAT]	4	3	6	27	0.827067	1.22076	1.17581	1.02781	1.33226	1.00132	1.13552	1.09652	0.774876	1.27265	1.09022	0.832345	1.60115	1.0579	1.14313	0.863684	0.832989	1.14779	0.813869	0.865377	1.6738	0.726691	1.23081	1.14673	0.844618	0.979387	0.781395	0.909549	1.10018	1.12711	1.39181	1.04522	0.694023	0.93807	0.860115	0.871889	80.899	22.9	29.448	10.1548
Q6AYH5	Dynactin subunit 2 OS=Rattus norvegicus OX=10116 GN=Dctn2 PE=1 SV=1 - [DCTN2_RAT]	2	1	7	12			1.59229				0.824557				0.911593				0.611328				1.48579				0.617391				0.792712				0.780327				0.777162		43.6	15.42	44.1207	5.26221
P61972	Nuclear transport factor 2 OS=Rattus norvegicus OX=10116 GN=Nutf2 PE=1 SV=1 - [NTF2_RAT]	1	2	3	13	1.25173			0.97174	0.579693			1.22498	1.27387			1.0598	2.40793			1.09638	0.572465			0.919971	0.64366			1.0063	1.10245			1.13356	1.71007			1.59575	1.05268			0.836637	69.8742	22.83	14.469	5.37646
B2RYP0	Ras homolog family member C OS=Rattus norvegicus OX=10116 GN=Rhoc PE=1 SV=1 - [B2RYP0_RAT]	5	4	5	23	0.763526		1.01545	1.02217	1.18569		0.983571	0.780819	0.975903		1.06681	0.804394	0.891484		0.945039	0.998941	0.891454		0.847006	0.856733	1.00405		1.11423	0.971173	1.2224		1.00896	0.935487	0.935736		1.38778	0.813188	1.17509		1.07522	1.10481	126.035	22.8	22.0223	6.58057
P32551	Cytochrome b-c1 complex subunit 2, mitochondrial OS=Rattus norvegicus OX=10116 GN=Uqcrc2 PE=1 SV=2 - [QCR2_RAT]	1	6	10	32	0.69919	1.15843	0.911275	0.591485	1.13549	0.885357	1.17211	1.02661	0.874292	0.832294	1.07823	0.850083	0.656386	0.907233	1.09862	1.79272	1.65873	0.806103	0.663238	0.609708	1.00411	1.55997	1.29085	1.22961	1.32702	0.811203	0.884237	0.796011	0.879304	1.07469	1.25669	1.23665	1.11142	0.668262	1.1897	1.14399	162.805	19.69	48.3662	9.14404
B2RZ77	Dermatopontin OS=Rattus norvegicus OX=10116 GN=Dpt PE=1 SV=1 - [B2RZ77_RAT]	3	4	4	33	0.925282	0.743202	1.93079	0.941016	0.554649	0.696052	0.740517	1.28733	1.98759	0.590522	0.862706	1.32627	2.00769	0.867766	0.782538	1.28892	0.546421	0.73719	1.47579	1.28922	0.582427	1.48536	0.695227	0.856405	0.773184	1.14051	1.1841	1.01714	1.86178	0.845085	0.628751	1.62401	0.679766	1.30243	1.03208	0.877203	215.997	22.77	24.1868	4.85596
Q5PPN5	Tubulin polymerization-promoting protein family member 3 OS=Rattus norvegicus OX=10116 GN=Tppp3 PE=2 SV=1 - [TPPP3_RAT]	1	2	2	9	1.03105	1.07813	1.13027	0.603573	0.794064	1.11642	1.09593	0.957578	1.8641	0.902473	0.796133	1.37049	1.75811	0.89526	0.583588	0.698938	0.572	1.09303	0.899043	1.07416	0.612521	1.20092	0.700873	0.697316	0.783167	1.4348	1.72358	1.18728	1.85642	1.09298	0.618703	1.59773	0.931824	1.1861	1.09261	0.57382	60.2133	22.73	18.9677	9.11475
A0A0G2K531	Glutathione peroxidase OS=Rattus norvegicus OX=10116 GN=Gpx3 PE=1 SV=1 - [A0A0G2K531_RAT]	2	1	4	17	1.57659	0.973138	0.770371	1.1302	1.11094	0.783059	0.740312	1.00244	0.784183	0.817948	1.1645	0.804451	0.937646	1.06398	1.1034	1.25243	1.10557	1.10465	1.10024	0.994433	1.14261	1.06406	0.817274	0.662507	1.13206	1.04666	1.05739	0.86322	0.867435	0.844646	0.820999	1.39417	1.16503	1.14235	0.74105	1.1468	72.4133	19.56	25.2579	8.11865
A0A0G2K1S6	Malic enzyme OS=Rattus norvegicus OX=10116 GN=Me1 PE=1 SV=1 - [A0A0G2K1S6_RAT]	3	5	7	17	1.17764	0.844931	0.710529	0.755894	1.06973	0.882849	3.82949	0.813787	1.10359	1.17682	1.06248	1.66233	1.06212	0.881693	1.31836	1.22854	1.05651	1.04565	0.695342	0.782131	0.828515	1.20131	0.991815	0.765868	1.02752	0.941505	1.01972	0.92128	1.21602	0.982042	1.01319	1.07454	1.14971	0.706107	0.816358	0.83876	139.337	17.16	63.7919	6.66846
D4A6C5	Rho GTPase-activating protein 1 OS=Rattus norvegicus OX=10116 GN=Arhgap1 PE=1 SV=1 - [D4A6C5_RAT]	1	3	8	47	0.981222	1.00037	1.32746	0.964203	1.14393	1.05463	1.0356	1.08646	0.956575	1.23644	0.849142	1.16832	1.06618	1.2606	0.880872	0.938455	1.04299	1.1436	1.07014	0.791172	0.957993	1.0513	1.35131	1.16562	1.09104	1.01741	0.988257	1.07992	0.876766	1.07258	0.971612	1.04206	1.37905	0.931322	0.799703	1.36136	157.285	22.55	50.5912	6.53662
D3ZY47	Similar to RIKEN cDNA 2310022B05 OS=Rattus norvegicus OX=10116 GN=RGD1559896 PE=1 SV=1 - [D3ZY47_RAT]	1	3	5	15			1.63728	1			0.947711	1.24685			1.08278	0.979554			0.707717	0.775413			1.8896	1.08811			0.841429	1.06885			0.978493	1.17587			1.00272	1.44865			1.04477	1.11141	147.605	22.53	35.6466	5.07178
B0BNL2	Peptidyl-prolyl cis-trans isomerase OS=Rattus norvegicus OX=10116 GN=Pin1 PE=1 SV=1 - [B0BNL2_RAT]	1	1	2	8			1.22992	1.06637			1.12444	1.71128			1.44999	1.40087			0.923833	1.31406			2.04553	0.99288			0.617361	1.22666			1.63146	1.25296			0.839054	1.85626			1.02414	0.907529	54.28	13.33	18.321	8.82178
Q66HR2	Microtubule-associated protein RP/EB family member 1 OS=Rattus norvegicus OX=10116 GN=Mapre1 PE=1 SV=3 - [MARE1_RAT]	1	1	4	11			0.837134				0.6768								0.787108				0.883419				0.765575				0.835649				0.788075				0.775757		39.87	22.39	29.9852	5.22412
G3V9R9	Afamin OS=Rattus norvegicus OX=10116 GN=Afm PE=1 SV=1 - [G3V9R9_RAT]	3	7	12	41	1.04255	0.592674	1.6516	1.15108	0.789453	0.758115	1.32391	1.30731	0.874549	0.699327	1.02205	2.64664	2.28188	0.60499	0.726089	1.14381	0.761341	0.744964	1.35601	1.63518	0.959083	0.990701	0.638747	0.847495	0.757907	0.988103	1.24756	1.39099	0.868373	0.619837	0.695588	2.23562	0.762734	1.11042	1.22552	0.804437	281.236	20.39	69.196	6.21436
P49432	Pyruvate dehydrogenase E1 component subunit beta, mitochondrial OS=Rattus norvegicus OX=10116 GN=Pdhb PE=1 SV=2 - [ODPB_RAT]	2	6	7	32	0.588865	1.09083	0.423993	0.919926	1.37115	0.952563	1.47982	1.14175	1.27045	0.951176	0.841491	1.31584	0.636706	0.874464	0.748443	0.87866	1.38105	0.926305	0.583634	0.988505	1.01285	1.63529	0.864939	0.847193	0.956402	0.944962	1.04254	1.05907	1.2265	1.3106	0.957377	0.596808	0.970667	1.01895	0.992339	0.83841	183.401	22.28	38.957	6.65381
P21571	ATP synthase-coupling factor 6, mitochondrial OS=Rattus norvegicus OX=10116 GN=Atp5pf PE=1 SV=1 - [ATP5J_RAT]	1	2	2	9	1.11857	0.918484		0.760963	0.80009	0.84661		1.55393	1.94133	0.538767		1.44808	2.30809	0.908657		0.577053	0.575122	0.918177		1.48536	0.579662	0.936663		0.971016	0.446058	1.06253		0.965815	1.60233	0.97921		2.38527	0.620853	1.71502		0.747179	68.2567	22.22	12.4866	9.43701
D4A2G9	RAN-binding protein 1 OS=Rattus norvegicus OX=10116 GN=Ranbp1 PE=1 SV=1 - [D4A2G9_RAT]	1	1	3	13	1.00377		1.88044	0.818377	0.671606		1.13827	1.4333	1.85443		1.00964	1.3855	2.12116		0.598729	0.581	0.576751		2.03984	1.27626	0.706669		0.553614	1.02968	0.697762		1.17935	1.16841	1.55924		0.826437	1.63269	0.772716		1.18741	0.739762	63.28	22.17	23.5817	5.22412
O54975	Xaa-Pro aminopeptidase 1 OS=Rattus norvegicus OX=10116 GN=Xpnpep1 PE=1 SV=1 - [XPP1_RAT]	2	4	12	45	0.408711		0.617788	1.30339	1.71352		1.06512	1.2783	0.716256		1.17868	1.05179	3.7511		1.74476	1.87514	0.891864		0.822044	0.867055	2.71455		0.99314	0.969681	0.887111		0.679023	0.661024	1.51757		1.27402	1.41315	0.821864		0.984252	1.76588	110.16	22.15	69.6131	5.60498
Q5RJR8	Leucine-rich repeat-containing protein 59 OS=Rattus norvegicus OX=10116 GN=Lrrc59 PE=1 SV=1 - [LRC59_RAT]	1	1	5	17																																					62.93	22.15	34.8477	9.5249
P24268	Cathepsin D OS=Rattus norvegicus OX=10116 GN=Ctsd PE=1 SV=1 - [CATD_RAT]	2	5	8	48	0.97838	0.74114	0.878154	0.978769	1.3916	0.972963	1.01575	1.02791	1.11435	0.900488	1.07691	1.27773	0.832517	1.02391	0.920704	1.42442	0.911979	0.842918	1.13898	0.82984	1.00339	1.60726	0.84075	0.800904	1.05633	0.85019	0.819581	0.839079	0.941824	0.901567	0.861094	0.975138	1.17639	1.09074	1.23385	1.18705	151.683	22.11	44.6519	7.09326
F1M265	Uncharacterized protein OS=Rattus norvegicus OX=10116 PE=1 SV=3 - [F1M265_RAT]	4	6	16	78	1.00462	1.29814	1.04444	0.841051	0.762076	0.880326	0.699395	0.63785	0.89737	1.06539	0.912794	1.07949	1.13495	0.828357	0.767705	0.406788	1.44707	1.49222	1.17447	1.18817	1.36558	0.459103	1.20527	0.930254	1.49536	1.45259	1.24501	1.16426	1.60514	1.6531	1.14969	0.667596	0.881398	0.881009	1.03729	1.03245	291.533	15.77	108.273	6.84424
P45953	Very long-chain specific acyl-CoA dehydrogenase, mitochondrial OS=Rattus norvegicus OX=10116 GN=Acadvl PE=1 SV=1 - [ACADV_RAT]	2	4	9	26	0.799411	1.01637	0.636985	0.984451	1.00107	0.958067	1.13034	0.984255	0.910231	0.911662	0.801465	0.912203	0.710452	0.968479	1.24022	1.28507	1.44199	0.852899	0.514848	0.955503	0.866597	2.08135	1.24088	0.916232	1.17319	0.880545	0.825952	0.861513	0.77995	1.22463	0.841259	0.612546	1.07641	0.939902	1.0872	1.07088	89.06	16.34	70.7046	8.89502
P06765	Platelet factor 4 OS=Rattus norvegicus OX=10116 GN=Pf4 PE=1 SV=1 - [PLF4_RAT]	1	2	2	7	1.29171		0.723223	0.962477	1.03508		0.709267	0.920417	1.64935		0.958526	2.21806	1.18477		0.622926	1.2603	1.18989		4.98489	0.879643	1.37498		0.430916	1.01499	0.843001		0.753981	0.904251	1.2969		0.697761	2.25032	0.829403		1.77979	1.04665	56.12	21.9	11.2793	9.49561
P62628	Dynein light chain roadblock-type 1 OS=Rattus norvegicus OX=10116 GN=Dynlrb1 PE=1 SV=3 - [DLRB1_RAT]	1	1	2	7				0.809574				1.22356				1.41237				0.789974				1.34179				0.955403				1.07169				2.02568				0.743991	32.18	21.88	10.9828	7.25439
Q5U300	Ubiquitin-like modifier-activating enzyme 1 OS=Rattus norvegicus OX=10116 GN=Uba1 PE=1 SV=1 - [UBA1_RAT]	2	13	19	75	1.00921	1.07027	0.79485	1.09984	1.27632	1.03176	1.04841	0.890843	0.883962	1.21571	1.00208	0.972059	0.801614	1.13148	1.30681	1.02953	1.09112	1.01733	0.731266	0.799434	0.926645	0.970618	1.15405	1.01607	0.959568	0.931509	0.815058	0.848849	0.758865	0.849289	1.10997	0.881551	1.25821	0.860835	0.907461	1.13001	362.907	16.73	117.713	5.56689
F1M779	Clathrin heavy chain OS=Rattus norvegicus OX=10116 GN=Cltc PE=1 SV=1 - [F1M779_RAT]	2	13	28	97	0.872559	1.41255	0.901833	1.00339	0.927075	0.91745	1.21723	0.838051	0.618503	1.439	1.01721	0.730815	0.80808	0.938942	0.913799	0.407924	1.3757	1.38062	0.762315	1.04205	1.40601	0.444208	1.36947	1.00254	0.614462	1.0424	0.865039	1.0268	0.966387	1.48246	1.60243	0.643508	0.825901	0.986039	0.639939	0.997847	330.57	17.31	191.438	5.69385
A0A0G2K5E6	60S ribosomal protein L30-like OS=Rattus norvegicus OX=10116 GN=LOC108351936 PE=4 SV=1 - [A0A0G2K5E6_RAT]	2	2	2	6	1.0982				0.902886				1.27293				1.37874				0.754486				0.796586				1.09026				1.38069				1.14792				68.96	21.74	12.8038	9.87646
A0A0G2K896	Similar to RIKEN cDNA 1300017J02 OS=Rattus norvegicus OX=10116 GN=RGD1310507 PE=1 SV=1 - [A0A0G2K896_RAT]	3	4	11	44	1.64879	0.907715	0.958734	1.00708	0.45783	0.960306	0.657059	0.803939	1.07324	0.835967	0.881201	0.774779	0.950905	1.08082	1.07437	1.11254	0.935897	1.27691	0.993608	0.98554	1.03343	1.46635	0.791876	0.611005	1.3396	1.70243	1.13219	1.08075	0.485443	1.00018	0.456771	0.85804	1.44085	1.23141	1.09876	0.980101	210.65	15.29	76.6714	6.96143
Q63083	Nucleobindin-1 OS=Rattus norvegicus OX=10116 GN=Nucb1 PE=1 SV=1 - [NUCB1_RAT]	1	3	7	26	1.41081	0.731953	1.66317	0.970543	0.636762	0.969596	1.1292	1.24363	1.32739	0.754213	1.56294	1.28468	1.61775	0.970787	1.37004	0.979443	0.734138	0.988925	1.78592	1.21944	0.800064	0.959633	1.17314	1.09473	1.04074	1.03351	1.66736	1.17754	1.30836	0.940747	1.43761	1.78735	0.951357	1.4591	1.12552	0.772996	96.5	19.17	53.4739	5.12256
F1LPV8	Succinate--CoA ligase [GDP-forming] subunit beta, mitochondrial OS=Rattus norvegicus OX=10116 GN=Suclg2 PE=1 SV=2 - [F1LPV8_RAT]	1	6	7	21	1.12345	0.990294	1.00344	1.08228	0.991026	1.06834	1.02793	0.92631	1.29218	0.907122	1.03429	0.981684	1.07048	1.04335	0.939306	0.872072	0.856803	0.940904	0.914768	0.952254	0.889769	1.02174	1.02009	1.04887	1.20563	0.916771	0.977731	0.832871	1.19474	0.930564	1.09022	0.741529	1.19103	0.969871	0.847447	1.09019	205.763	15.55	46.6095	7.7085
Q4FZY0	EF-hand domain-containing protein D2 OS=Rattus norvegicus OX=10116 GN=Efhd2 PE=1 SV=1 - [EFHD2_RAT]	1	4	6	43	1.23765	1.01517	0.967713	0.96286	0.776195	1.04318	0.925244	1.07567	1.64583	1.00547	0.780734	1.23181	1.39148	1.17578	0.858233	0.71	0.995981	1.04861	1.20313	0.879453	0.901266	0.918501	0.837719	1.03522	1.02404	1.21275	0.977746	1.05449	1.17223	0.888842	0.858902	1.33034	0.938955	1.31367	0.960616	1.11293	248.036	20.92	26.7425	5.07178
P32038	Complement factor D OS=Rattus norvegicus OX=10116 GN=Cfd PE=1 SV=2 - [CFAD_RAT]	2	2	3	13	1.18217	0.959738	1.63023		1.21592	1.26077	1.13939		1.09136	0.538795	0.955372		1.49545	1.08315	0.71434		0.967706	1.40623	1.2351		1.04507	1.45579	0.52679		1.02034	0.945549	1.22469		1.11497	1.19412	0.722791		0.814641	2.02768	1.06457		86.71	21.29	28.4242	7.06396
P59215	Guanine nucleotide-binding protein G(o) subunit alpha OS=Rattus norvegicus OX=10116 GN=Gnao1 PE=1 SV=2 - [GNAO_RAT]	12	4	7	40	0.547629		1.05404	1.36003	1.56838		0.943998	1.0347	0.679776		0.7913	0.83687	0.494171		1.38469	1.74899	1.12456		0.968083	0.814564	1.11696		1.13135	0.958879	1.02148		0.998618	0.849429	0.637942		1.36161	0.926746	1.084		0.982313	1.44845	215.756	21.19	40.0429	5.52881
D4A0W2	Lysozyme f1 OS=Rattus norvegicus OX=10116 GN=RGD1306474 PE=3 SV=1 - [D4A0W2_RAT]	1	2	3	3			0.348421				8.89759				0.357737				0.702872				0.389197				6.10278				0.364942				0.75884				0.235759		67.9	21.19	16.9689	9.84717
Q6URK4	Heterogeneous nuclear ribonucleoprotein A3 OS=Rattus norvegicus OX=10116 GN=Hnrnpa3 PE=1 SV=1 - [ROA3_RAT]	1	1	4	17	1.25491			1.03456	0.577882			1.22025	1.36875			0.975712	0.872875			0.635297	0.754087			1.09244	0.771883			0.957369	1.37436			1.13318	1.25968			0.628184	1.17964			0.834308	45.17	21.11	39.6276	9.01221
M0R4Y0	Epsilon-sarcoglycan OS=Rattus norvegicus OX=10116 GN=Sgce PE=4 SV=2 - [M0R4Y0_RAT]	2	3	5	26	1.23446	1.46339	1.36507	0.993486	0.968613	1.16004	0.92481	0.937846	1.21937	1.2487	0.867298	1.16015	1.281	1.37977	0.889	0.595241	1.00338	1.17781	1.47095	0.957491	1.15015	1.22449	0.856322	0.980648	1.41839	1.20862	0.986184	0.801403	1.22613	1.03986	0.91147	1.97807	1.48103	1.07209	0.834987	0.804951	67.06	18.63	46.4564	6.55127
P11951	Cytochrome c oxidase subunit 6C-2 OS=Rattus norvegicus OX=10116 GN=Cox6c2 PE=1 SV=3 - [CX6C2_RAT]	1	1	2	9	0.682573	1.01348	1.08121	0.825117	0.876361	0.925142	1.08236	1.21077	1.06363	0.756583	0.866391	1.13295	0.662458	0.933239	1.06418	0.835706	1.23175	0.86891	0.823356	0.8209	0.850363	1.74035	0.943909	0.860779	0.964403	0.927134	0.88005	0.86615	0.92455	1.02891	1.00944	0.968965	1.08012	1.1311	0.965874	0.905949	43.3	21.05	8.44945	10.0669
P06757	Alcohol dehydrogenase 1 OS=Rattus norvegicus OX=10116 GN=Adh1 PE=1 SV=3 - [ADH1_RAT]	2	4	7	24		0.674271		2.76502		1.76194		1.1558		2.0108		1.73021		1.1357		3.71377		0.727438		1.51762		1.13243		2.04488		0.749432		1.41785		1.13662		1.2857		0.701794		1.58424	45.81	17.55	39.6195	8.17725
P09456	cAMP-dependent protein kinase type I-alpha regulatory subunit OS=Rattus norvegicus OX=10116 GN=Prkar1a PE=1 SV=2 - [KAP0_RAT]	1	1	6	16	0.91513	1.15751	1.02892	1.03876	1.06071	0.98703	1.0251	1.0389	0.915751	0.808042	1.01539	0.841451	0.859887	0.915301	0.991113	0.867272	0.989006	1.10533	1.13201	1.12864	0.997052	0.763545	1.21253	1.02012	0.979645	0.958887	1.07633	1.0652	1.21203	1.02297	1.35693	0.919595	1.21049	0.823299	1.12841	0.965599	63.5376	17.06	43.068	5.35107
A0A0G2K0Q7	Myosin light chain kinase OS=Rattus norvegicus OX=10116 GN=Mylk PE=1 SV=1 - [A0A0G2K0Q7_RAT]	24	18	40	304	0.844127	1.20634	0.957691	1.03652	1.38544	0.972982	1.00299	0.808398	0.641879	1.09574	0.981478	0.74848	0.606399	1.10052	1.09972	0.504831	1.20993	1.22829	0.636006	0.829196	1.34277	0.523582	1.65874	1.16106	0.921349	0.887282	0.895509	0.83664	0.617121	1.18909	1.5486	0.643106	0.970521	0.790119	0.834839	1.24923	1050.7	17.73	213.869	5.99854
F1M7X3	Cadherin 13 OS=Rattus norvegicus OX=10116 GN=Cdh13 PE=1 SV=3 - [F1M7X3_RAT]	2	5	7	56	1.33196	0.852254	1.62924	0.818416	0.951176	1.02204	0.65062	0.972755	1.79595	0.623159	0.675547	1.20963	2.39802	0.933256	0.666204	0.891446	0.746082	1.22279	1.58758	1.12473	0.93631	1.01707	0.614716	0.980676	0.823503	1.13383	1.26847	0.961541	1.80562	0.919773	0.752978	1.10388	0.743505	1.13065	0.900202	0.786117	344.449	18.06	66.4329	4.95752
P13086	Succinate--CoA ligase [ADP/GDP-forming] subunit alpha, mitochondrial OS=Rattus norvegicus OX=10116 GN=Suclg1 PE=2 SV=2 - [SUCA_RAT]	2	2	7	25	0.827174	1.1201		0.974036	0.994424	1.06856		0.899094	1.00757	0.831838		1.07633	0.648319	1.00604		1.02669	1.30871	0.942935		0.878457	0.821356	1.44026		0.914131	1.11525	0.997002		0.915814	0.785545	1.01181		0.746791	1.02927	1.08817		1.12163	127.703	18.21	36.125	9.48096
G3V741	Phosphate carrier protein, mitochondrial OS=Rattus norvegicus OX=10116 GN=Slc25a3 PE=1 SV=1 - [G3V741_RAT]	3	2	6	32	0.781686		0.634103	1.11746	1.249		1.03657	0.742763	0.780279		0.905685	0.927389	0.946741		0.964033	1.74205	1.0389		0.599296	0.713723	1.16735		1.51866	0.984842	1.03048		0.83511	0.78011	0.686813		1.19168	0.718017	1.02941		0.994513	1.291	116.26	20.79	39.5054	9.26123
Q6PCU4	Emd protein OS=Rattus norvegicus OX=10116 GN=Emd PE=1 SV=1 - [Q6PCU4_RAT]	2	2	4	7	1.01808		1.39569		0.80111		0.551631		1.07887		1.17398		1.59739		1.043		0.751242		1.44303		0.88452		0.836404		0.590505		0.787068		1.41022		0.728611		0.939785		0.985762		42.7233	20.77	29.5674	5.18604
G3V796	Acetyl-Coenzyme A dehydrogenase, medium chain OS=Rattus norvegicus OX=10116 GN=Acadm PE=1 SV=1 - [G3V796_RAT]	2	6	8	40	0.841686	1.19087	0.613504	0.935401	1.21852	1.08547	1.19995	1.14329	0.931144	0.990051	0.828734	1.0805	0.942683	1.18558	1.22271	1.15949	1.50337	0.971795	0.561669	1.03701	1.29914	1.72401	1.0618	1.04982	1.16305	0.96029	0.875908	0.931328	0.88379	1.1148	0.665672	0.931502	0.944517	1.03926	0.889739	0.982293	160.96	17.58	46.5418	8.41162
P12711	Alcohol dehydrogenase class-3 OS=Rattus norvegicus OX=10116 GN=Adh5 PE=1 SV=2 - [ADHX_RAT]	2	1	5	16		0.935311				1.13587				1.16912				1.10507				1.00109				0.942423				0.813118				0.930342				0.836054			61.0133	18.45	39.5502	7.48877
P23928	Alpha-crystallin B chain OS=Rattus norvegicus OX=10116 GN=Cryab PE=1 SV=1 - [CRYAB_RAT]	1	1	2	13	1.17392		1.77329	1.05998	1.16817		0.891446	1.43595	1.7016		1.01318	1.80115	1.01361		0.441543	0.863353	0.917907		1.09194	1.07907	0.913377		0.53411	0.918364	0.941691		1.02767	1.07853	1.2638		1.10388	1.59272	0.88812		0.965929	1.04926	65.65	20.57	20.0763	7.32764
F1LR92	Serine protease inhibitor A3M OS=Rattus norvegicus OX=10116 GN=Serpina3m PE=1 SV=3 - [F1LR92_RAT]	2	4	6	20		0.573425	0.774432	0.611147		0.838764	1.42313	1.24744		0.491931	1.41802	1.18663		0.870506	1.26737	2.52755		0.868423	0.957083	1.01238		1.19778	1.15357	1.14193		0.876453	1.87007	1.57378		0.774095	0.664997	1.01229		0.737296	1.71233	1.26323	160.7	18.38	46.8115	5.65576
G3V7X5	SPARC-like 1 (Mast9, hevin), isoform CRA_a OS=Rattus norvegicus OX=10116 GN=Sparcl1 PE=1 SV=1 - [G3V7X5_RAT]	2	6	9	46	1.40149	0.601405	1.9028	0.944878	1.48983	1.04897	0.924707	0.779601	0.995306	0.687354	1.56182	1.02778	1.79889	0.894815	0.66121	0.547389	2.24757	0.941692	1.97219	1.13263	1.10783	0.861937	0.629413	1.3909	1.32204	1.18942	1.11745	1.38364	1.06045	0.907955	0.933192	1.4855	0.901104	0.856972	1.05653	0.753202	167.805	19.4	70.51	4.69092
Q6MGC4	H2-K region expressed gene 2, rat orthologue OS=Rattus norvegicus OX=10116 GN=Pfdn6 PE=1 SV=1 - [Q6MGC4_RAT]	1	1	2	9				0.90371				1.16127				1.24751				0.682448				1.17046				1.03233				1.03961				1.35103				0.819432	33.77	20.47	14.4888	8.88037
Q6PCT3	Tumor protein D54 OS=Rattus norvegicus OX=10116 GN=Tpd52l2 PE=1 SV=1 - [TPD54_RAT]	1	1	2	6			1.31329	1.03981			0.903122	1.15053			1.17109	1.1107			0.660508	1.24086			1.50439	1.08382			0.565187	1.11852			1.21913	1.3422			0.838384	1.09918			1.45496	1.10178	32.45	20.45	23.9771	6.15088
G3V8V3	Alpha-1,4 glucan phosphorylase OS=Rattus norvegicus OX=10116 GN=Pygm PE=1 SV=1 - [G3V8V3_RAT]	3	1	15	87			0.726728				1.49517				1.04768				1.31997				0.642759				1.21089				1.10272				0.998572				1.22607		278.731	16.51	97.2267	7.10791
A0A0G2K5F1	LRP16 protein OS=Rattus norvegicus OX=10116 GN=Macrod1 PE=1 SV=1 - [A0A0G2K5F1_RAT]	3	1	4	6	1.0277	1.11505			1.12996	1.0486			1.08311	1.25389			1.01385	0.982234			0.974079	0.865812			0.840532	1.09541			1.025	0.835196			0.835771	0.898558			1.15302	1.25456			67.81	17.34	35.2854	9.02686
D3ZZC1	RCG43947 OS=Rattus norvegicus OX=10116 GN=Txndc5 PE=1 SV=1 - [D3ZZC1_RAT]	1	3	5	20	1.10326	0.766285	1.62012	0.729522	0.790605	0.952129	0.916045	0.990409	1.33299	0.809614	0.814146	0.626576	1.54746	0.972194	0.745043	1.87542	0.61084	0.940599	1.70305	2.03999	0.663784	0.862256	0.654278	0.958196	0.822039	0.938704	1.08415	0.954938	1.47012	0.975914	0.836643	1.61377	0.868871	1.02507	1.04255	0.933279	98.0933	18.23	46.324	5.88428
D4A702	Synaptopodin-2 OS=Rattus norvegicus OX=10116 GN=Synpo2 PE=1 SV=2 - [SYNP2_RAT]	1	12	20	108	1.251	1.20184	2.85361	0.88863	0.7002	0.745872	0.885347	1.36102	0.864928	0.768244	0.874135	0.740329	2.18915	0.659412	0.712076	0.287865	1.04571	1.28369	2.22489	1.30549	1.32883	0.33098	0.82181	1.17533	0.526646	1.16776	1.06335	1.10416	1.31588	0.951443	1.14654	0.696184	0.706902	1.20138	0.674326	0.978276	425.997	17.43	135.941	8.51416
P16296	Coagulation factor IX OS=Rattus norvegicus OX=10116 GN=F9 PE=2 SV=2 - [FA9_RAT]	1	4	7	19	1.15931	0.818554	1.5505	1.38567	0.322623	0.550769	0.922906	1.20707	1.07593	0.424682	1.20223	1.12492	0.884003	0.829475	1.05604	1.49103	0.65799	0.863801	1.33597	1.07765	0.820191	0.887376	0.834504	0.998426	0.813679	1.06587	1.42249	1.15	0.456452	0.710935	0.953573	1.22614	1.35812	0.90044	1.03398	1.04944	133.27	13.42	51.7753	5.30029
P14408	Fumarate hydratase, mitochondrial OS=Rattus norvegicus OX=10116 GN=Fh PE=1 SV=1 - [FUMH_RAT]	2	4	8	31	0.572441	1.66714	0.640875	0.907189	2.05425	1.39913	1.27503	0.90514	0.649073	1.12244	0.876192	0.838922	2.50065	0.973197	1.07361	1.00576	0.867882	1.543	0.686444	0.977008	3.09364	1.3206	1.09203	0.969368	1.37956	1.33115	0.992939	0.979722	1.14205	1.35345	1.005	0.830132	1.09147	1.00025	1.13605	0.848849	187.645	20.12	54.429	8.95361
G3V6A9	Microfibril-associated protein 4 OS=Rattus norvegicus OX=10116 GN=Mfap4 PE=1 SV=2 - [G3V6A9_RAT]	2	2	4	76	0.689323	1.38918	0.572906	1.27133	0.884557	1.25432	0.743729	0.688715	0.546564	1.22084	0.795493	0.602959	0.44747	1.57105	1.50853	1.25644	1.54373	1.20576	0.479288	0.831771	1.50384	1.48689	1.23181	0.916837	1.09185	0.699987	0.810833	0.846766	0.561456	1.59003	1.22795	0.5914	1.27064	0.803015	1.05689	1.71544	444.051	20.31	28.7869	5.2876
P29266	3-hydroxyisobutyrate dehydrogenase, mitochondrial OS=Rattus norvegicus OX=10116 GN=Hibadh PE=1 SV=3 - [3HIDH_RAT]	1	4	5	10	0.789054	1.04697	1.06026	1.13057	1.41094	1.23436	1.07569	0.952461	1.0649	0.862165	1.11678	0.882914	0.738616	1.15021	0.96166	0.639976	1.14751	0.88498	1.09337	1.12302	1.18042	0.911844	1.08862	0.915352	1.13546	0.97904	1.20786	0.944292	0.96909	1.1356	1.24971	0.714113	1.04734	0.998449	1.21845	1.24599	162.35	18.21	35.2796	8.47021
Q9ES40	PRA1 family protein 3 OS=Rattus norvegicus OX=10116 GN=Arl6ip5 PE=1 SV=1 - [PRAF3_RAT]	2	1	2	4			1.32653				0.792545				1.0355				1.26347				1.2476				1.03896				0.79713				0.908319				0.742838		39.49	20.21	21.5343	9.61279
P05370	Glucose-6-phosphate 1-dehydrogenase OS=Rattus norvegicus OX=10116 GN=G6pdx PE=1 SV=3 - [G6PD_RAT]	1	4	8	28	1.06483	0.993025	0.494932	1.32171	0.922233	0.842506	0.865431	1.04079	1.14121	1.15161	0.850629	1.40392	0.825784	1.26236	1.22593	1.74048	0.957921	0.913429	0.705421	0.662975	0.950435	0.972484	0.8615	0.799902	0.835086	0.753942	0.776695	0.807665	0.920184	0.98444	0.879535	0.732612	1.14288	0.897742	0.824355	1.07934	153.767	12.82	59.3378	6.37939
Q62651	Delta(3,5)-Delta(2,4)-dienoyl-CoA isomerase, mitochondrial OS=Rattus norvegicus OX=10116 GN=Ech1 PE=1 SV=2 - [ECH1_RAT]	1	1	4	8				1.32033				1.05305				0.82491				1.0222				0.800139				0.712478				1.05427				0.590369				1.14532	35.65	13.46	36.1484	7.98682
B2RYQ2	Serine/threonine-protein phosphatase 2A activator OS=Rattus norvegicus OX=10116 GN=Ptpa PE=1 SV=1 - [B2RYQ2_RAT]	1	2	4	13	0.994128	0.829546		1.00098	1	0.934443		0.875953	1.08328	0.853301		0.973164	0.93072	0.982242		1.02345	0.81239	0.909082		0.936821	0.869174	1.12419		0.832617	1.18526	0.944241		1.06666	0.991818	0.920072		1.32112	1.18498	0.850517		1.02675	62.0567	17.96	36.5937	6.29053
A0A0G2K2R5	EGF-containing fibulin extracellular matrix protein 2 OS=Rattus norvegicus OX=10116 GN=Efemp2 PE=1 SV=1 - [A0A0G2K2R5_RAT]	3	5	8	21	1.05617	1.1757	0.986603	0.850009	1.14475	1.08764	0.75315	1.01509	0.801796	1.14624	1.30477	0.997754	2.2856	1.21596	1.06623	1.04932	1.26021	1.02329	1.12686	0.922259	2.2588	1.19262	0.999196	0.726025	1.26471	1.03559	0.982668	0.888712	1.32187	1.37299	1.36134	1.20911	0.725302	0.977924	1.02773	1.29337	91.87	20.09	49.3542	4.89404
Q5XIH1	Asporin OS=Rattus norvegicus OX=10116 GN=Aspn PE=1 SV=1 - [Q5XIH1_RAT]	1	3	6	23	1.28832	1.17782		0.888674	0.770746	0.984682		0.519714	1.05529	1.51497		1.07354	1.42378	1.47819		0.98083	0.820329	1.23673		0.802863	0.78798	1.3261		0.711746	1.0852	1.36991		0.73171	1.30032	1.19766		0.81441	1.27292	1.20564		0.88411	104.557	16.27	42.7402	8.29443
O54842	Nuclear protein 1 OS=Rattus norvegicus OX=10116 GN=Nupr1 PE=2 SV=1 - [NUPR1_RAT]	2	1	1	3	0.766909	0.813357	0.967975		1.08858	0.688194	0.675659		0.96662	0.44851	1.54548		2.5064	0.902875	1.07038		1.74669	0.526397	1.50602		1.41745	0.627138	0.569407		1.36054	0.837647	1.05181		0.963997	0.499106	0.848314		0.947334	0.561529	1.34234		29.57	20	8.94953	9.46631
P97521	Mitochondrial carnitine/acylcarnitine carrier protein OS=Rattus norvegicus OX=10116 GN=Slc25a20 PE=1 SV=1 - [MCAT_RAT]	2	1	3	5			0.552965				1.5114				0.959282				1.07122				0.701522				0.912752				1.08571				0.813913				1.17817		91.06	15.61	33.1322	9.48096
Q63514	C4b-binding protein alpha chain OS=Rattus norvegicus OX=10116 GN=C4bpa PE=2 SV=1 - [C4BPA_RAT]	2	2	11	25	0.573136	1.00009	1.26564	1.60606	0.198933	0.458775	0.629283	1.04827	1.52382	0.379625	1.56908	0.620156	0.412429	0.925086	0.795911	0.511873	0.90443	1.44997	1.18709	1.50509	1.05504	0.488171	0.742433	1.0239	0.844263	1.1265	2.51373	1.70732	0.313515	0.688327	0.664521	0.691064	1.71424	0.741111	1.14465	1.14835	89.8	13.62	62.225	7.21045
P61354	60S ribosomal protein L27 OS=Rattus norvegicus OX=10116 GN=Rpl27 PE=2 SV=2 - [RL27_RAT]	3	1	3	5				1.06288				0.834114				1.01853				0.462479				1.0675				1.18471				0.81697				0.770485				1.18078	41.75	14.71	15.7877	10.5649
B2GUW1	Frizzled-related protein OS=Rattus norvegicus OX=10116 GN=Frzb PE=2 SV=1 - [B2GUW1_RAT]	1	4	6	27	0.68162	0.944451	1.00252	0.909565	1.11421	1.15736	1.07476	0.98243	0.842366	0.954315	1.06634	0.927701	0.770396	1.01815	0.886926	1.12788	1.23853	0.755519	0.973903	0.945388	0.992965	1.22106	1.11379	1.15668	1.26937	1.003	1.08435	1.08437	0.638664	0.938561	1.02244	1.23621	0.925999	0.709308	1.09772	1.39908	138.78	12.69	36.0362	8.36768
A0A096MJ04	Glutathione S-transferase omega 1, isoform CRA_a OS=Rattus norvegicus OX=10116 GN=Gsto1 PE=1 SV=1 - [A0A096MJ04_RAT]	3	1	3	6	1.1437			1.03371	1.31664			1.03434	1.28556			0.947851	1.06509			0.983268	1.03309			0.960289	0.942946			0.880037	1.23288			1.0899	0.806578			1.13257	1.36557			0.933308	57.65	15.49	24.9276	6.40479
A0A140TA99	Elongin-B OS=Rattus norvegicus OX=10116 GN=Elob PE=1 SV=1 - [A0A140TA99_RAT]	4	2	3	9	0.974763	0.899183	1.1163	0.923475	0.956785	0.984842	0.892778	1.1358	1.15891	0.721041	1.13911	1.18436	1.32204	1.18252	0.790187	1.48436	0.775673	0.956586	1.15583	1.11743	0.89572	1.17284	0.976077	0.882029	0.999753	0.847318	0.863513	0.809461	1.32493	0.887654	0.940485	1.12166	0.939452	0.894029	0.674831	0.916375	38.5181	13.68	13.0306	5.0083
D4AB01	Histidine triad nucleotide binding protein 2 (Predicted), isoform CRA_a OS=Rattus norvegicus OX=10116 GN=Hint2 PE=1 SV=1 - [D4AB01_RAT]	1	2	2	4	1.89529	0.942711			0.70182	0.604178			1.71542	0.714471			2.77025	0.731332			0.716008	0.754884			0.937948	0.837427			1.01385	1.1474			2.33279	0.793766			1.15572	1.04951			37.19	19.63	17.3693	9.42236
P04638	Apolipoprotein A-II OS=Rattus norvegicus OX=10116 GN=Apoa2 PE=2 SV=1 - [APOA2_RAT]	1	2	2	51	1.52022	0.955635	1.53971	0.524716	0.41982	1.5446	0.66924	0.563298	1.7604	0.557967	0.765826	2.14648	3.40976	0.775948	0.255277	0.855193	0.715819	1.37779	1.29184	1.26117	0.795401	1.26796	0.297989	0.421141	0.784057	3.14808	0.571213	0.55263	1.34925	0.448401	0.268176	1.41236	0.94483	1.76045	0.853963	0.367075	241.733	19.61	11.4319	6.65381
P08644	GTPase KRas OS=Rattus norvegicus OX=10116 GN=Kras PE=1 SV=3 - [RASK_RAT]	3	1	2	3		0.89026				0.993742				0.915183				1.01289				0.906953				1.32213				0.822774				0.988817				0.854961			53.75	19.58	21.642	6.771
D3ZZT9	Collagen type XIV alpha 1 chain OS=Rattus norvegicus OX=10116 GN=Col14a1 PE=1 SV=3 - [D3ZZT9_RAT]	1	19	29	167	1.01558	1.47282	0.966943	1.01523	0.660715	0.859284	1.34762	1.07868	0.935235	1.31552	0.85026	0.922078	0.616387	1.17251	1.48823	0.718866	0.797535	0.840833	0.809469	0.770016	1.1999	0.597881	1.54192	1.18116	0.920019	1.00439	1.13349	0.883744	0.983739	0.940092	1.07069	0.848389	1.02698	0.63412	0.802885	1.37468	733.224	17.17	192.445	5.22412
Q64057	Alpha-aminoadipic semialdehyde dehydrogenase OS=Rattus norvegicus OX=10116 GN=Aldh7a1 PE=1 SV=2 - [AL7A1_RAT]	1	2	8	12			0.813913				0.999404				1.09658				1.28086				0.730482				1.25406				0.93908				1.09303				0.996082		64.5433	16.7	58.7114	7.86963
B5DF46	Phosphomannomutase OS=Rattus norvegicus OX=10116 GN=Pmm2 PE=1 SV=1 - [B5DF46_RAT]	1	2	3	19	0.961744	0.669407	0.701885	1.32737	1.23597	0.664587	1.06926	0.935673	1.02663	0.749836	1.12371	0.758635	1.16588	0.975576	1.18255	0.753609	0.816791	0.81308	0.975531	0.766917	1.10863	0.792403	1.30652	0.719344	0.937987	0.710952	1.06532	1.15432	1.0963	0.883208	1.01777	1.45126	1.28067	0.828923	1.14012	1.11101	96.33	19.42	27.6911	7.29834
P00406	Cytochrome c oxidase subunit 2 OS=Rattus norvegicus OX=10116 GN=Mtco2 PE=1 SV=3 - [COX2_RAT]	1	3	4	40	1.06158	0.948434	0.803855	1.03359	0.895062	0.911701	1.12969	0.983267	0.714117	0.914471	0.87902	1.1468	0.732992	1.013	1.18145	1.38065	1.24309	1.0316	0.76854	0.944067	0.789263	1.67531	1.03942	0.998591	0.83343	0.90859	0.80567	0.801535	0.847896	1.08382	1	0.827235	1.1196	1.21447	1.02132	1.20081	69.7878	19.38	25.9111	4.729
Q5U318	Astrocytic phosphoprotein PEA-15 OS=Rattus norvegicus OX=10116 GN=Pea15 PE=1 SV=1 - [PEA15_RAT]	1	2	3	16			1.68522	0.996017			0.988545	1.24673			1.26938	1.41604			0.448335	1.05372			1.26159	1.04882			0.607911	1.00054			1.26812	1.36535			0.834201	1.59098			1.26416	0.942792	101.643	19.23	15.0308	5.021
B2GV72	Carbonyl reductase 3 OS=Rattus norvegicus OX=10116 GN=Cbr3 PE=1 SV=1 - [B2GV72_RAT]	1	1	3	9			1.01488				0.835534				0.868527				0.892002				1.01484				0.844868				0.975822				0.884639				0.985444		64.7867	19.13	30.8218	6.90283
G3V843	Prothrombin OS=Rattus norvegicus OX=10116 GN=F2 PE=1 SV=1 - [G3V843_RAT]	2	8	13	50	1.13398	0.774099	1.44342	0.934064	0.415109	0.832816	0.953238	1.07248	1.65133	0.632252	0.945376	1.72298	1.8605	0.829892	0.670827	0.997213	0.711675	1.01868	1.55766	1.1826	0.74815	1.24602	0.659304	0.772013	0.874788	1.42428	1.23117	1.15882	1.08422	0.659971	0.585591	2.51125	1.08076	1.36767	1.19171	0.747631	174.982	19.12	70.3406	6.7124
Q4V8F6	Pcbp2 protein OS=Rattus norvegicus OX=10116 GN=Pcbp2 PE=1 SV=1 - [Q4V8F6_RAT]	3	3	5	19	0.984645	1.04826	0.836957	1.10576	0.989472	0.996203	1.21441	0.890903	0.919498	1.11822	1.0582	0.770185	0.969006	0.858587	1.17941	0.794943	1.07912	1.16427	0.885607	1.0153	0.879075	0.785687	0.987518	0.969829	1.19507	1.02579	1.01916	1.05399	0.972597	1.08626	1.08713	0.75016	0.965273	1.06341	0.926646	1.21401	99.23	16.72	35.3242	8.00146
Q9JHY2	Sideroflexin-3 OS=Rattus norvegicus OX=10116 GN=Sfxn3 PE=2 SV=1 - [SFXN3_RAT]	4	3	5	10	0.7067	1.04442			1.47246	0.802434			0.850663	0.90871			0.971477	0.97766			1.41968	0.973963			1.27442	0.539042			0.958489	0.801523			0.746162	1.15581			0.718767	0.577468			62.6167	14.33	35.4106	9.74463
A0A0G2K8Q1	Apolipoprotein C-III OS=Rattus norvegicus OX=10116 GN=Apoc3 PE=1 SV=1 - [A0A0G2K8Q1_RAT]	1	1	1	8	2.14358	0.939296	0.758848	0.505945	0.190815	0.931964	0.951354	0.802749	2.08386	0.666151	0.739955	1.6338	2.2821	0.885945	0.483675	0.650349	0.233684	0.879953	1.31967	1.43945	0.509293	1.30712	0.442454	0.523435	1.17087	1.89619	1.17184	0.775234	1.31337	0.547761	0.441307	1.55304	1.25271	1.79216	0.791481	0.585516	105.62	19	11.0225	4.76709
P10959	Carboxylesterase 1C OS=Rattus norvegicus OX=10116 GN=Ces1c PE=1 SV=3 - [EST1C_RAT]	4	5	7	42	2.04606	0.473087	0.589447	1.52779	0.806379	0.759283	0.956006	1.04122	1.08108	0.525537	1.22198	1.28258	1.16702	0.712376	1.39163	1.99204	1.28882	0.726965	0.807209	1.45792	1.32531	1.13069	0.978654	1.312	1.26709	0.819524	1.60607	1.43442	0.688862	0.716011	0.37217	1.18174	0.968536	0.728322	2.0414	1.27985	222.679	16.94	60.1365	5.73193
P04182	Ornithine aminotransferase, mitochondrial OS=Rattus norvegicus OX=10116 GN=Oat PE=1 SV=1 - [OAT_RAT]	1	1	6	22	0.991334	1.23073	1.15687		1.17529	1.0914	0.917012		0.835715	1.21656	0.79949		0.875036	1.48325	1.22868		0.902004	1.24702	0.840426		0.826433	1.09907	1.13074		1.03133	0.917355	0.82489		0.598075	1.00473	1.03947		1.37593	1.03996	0.965759		66.03	15.49	48.302	6.99072
Q5XI78	2-oxoglutarate dehydrogenase, mitochondrial OS=Rattus norvegicus OX=10116 GN=Ogdh PE=1 SV=1 - [ODO1_RAT]	2	5	14	46	1.12108	1.14566	0.839518	0.552805	0.898528	0.857735	1.18115	1.23395	0.712848	1.13353	0.852094	0.699607	0.791655	0.918583	1.12017	1.36155	1.44924	1.1158	0.732088	0.724549	1.10981	1.14156	1.03663	1.35283	1.08045	0.862088	0.889343	0.863184	0.838535	1.06077	0.962275	1.28991	1.25809	1.16018	0.80436	0.968314	154.911	10.36	116.221	6.771
A9UMV9	NADH:ubiquinone oxidoreductase subunit A7 OS=Rattus norvegicus OX=10116 GN=Ndufa7 PE=1 SV=1 - [A9UMV9_RAT]	1	1	2	2	0.835653				0.658533				1.38556				1.05423				0.981753				0.805434				0.751764				1.32182				0.99869				31.19	10.71	12.4926	10.4771
P00884	Fructose-bisphosphate aldolase B OS=Rattus norvegicus OX=10116 GN=Aldob PE=1 SV=2 - [ALDOB_RAT]	2	1	6	14				1.10465				0.950441				1.02116				1.64408				1.68644				1.13075				0.931515				1.1372				0.701035	48.4705	15.11	39.5932	8.39697
Q5PQM7	LIM and senescent cell antigen-like-containing domain protein OS=Rattus norvegicus OX=10116 GN=Lims2 PE=1 SV=1 - [Q5PQM7_RAT]	2	2	4	11	0.858345	1.27408			1.12211	1.00157			0.587013	1.33945			0.688291	1.08634			1.45838	1.30952			1.45036	0.659552			0.555861	1.0724			0.729566	1.20384			0.844634	1.23383			57.43	18.63	34.3181	7.02002
F1LTJ5	Uncharacterized protein OS=Rattus norvegicus OX=10116 PE=1 SV=3 - [F1LTJ5_RAT]	1	21	32	216	0.934731	1.21483	0.910533	1.18104	0.984922	1.16252	0.778823	0.840014	0.536002	1.40442	0.754999	0.641308	0.55002	1.32081	1.42701	0.440559	1.39596	1.20095	0.787033	1.0414	1.03074	0.663909	1.23681	0.991278	1.19409	1.07203	0.889713	1.10477	0.923063	1.53733	1.45562	0.695799	0.871343	0.849107	0.866379	1.30081	1058.48	17.44	262.948	5.98584
D3ZKE6	Sarcolemma associated protein (Predicted) OS=Rattus norvegicus OX=10116 GN=Slmap PE=1 SV=1 - [D3ZKE6_RAT]	5	10	15	56	1.25953	1.14701	1.41584	1.03635	1.0979	1.1347	0.886162	1.31256	0.815184	1.11459	1.01298	0.811004	1.17377	0.971197	0.892346	0.412351	1.07111	1.24358	1.46093	1.00669	1.1784	0.489235	0.781391	1.08818	0.844999	1.10459	1.00654	1.08512	1.04206	0.998288	1.27722	1.09729	0.902518	1.23993	0.896052	1.08777	248.921	13.34	90.504	5.19873
P63095	Guanine nucleotide-binding protein G(s) subunit alpha isoforms short OS=Rattus norvegicus OX=10116 GN=Gnas PE=1 SV=1 - [GNAS2_RAT]	14	4	6	30	0.84035		0.847854	1.20698	1.25709		0.920266	1.10318	0.984526		0.880265	1.1591	0.949388		1.30448	1.67122	0.999683		0.726593	0.836071	0.848992		1.11152	1.20303	2.143		0.814906	0.993415	0.928932		1.22524	1.30688	1.15618		0.975349	1.16003	224.589	10.91	45.6349	5.96045
P62907	60S ribosomal protein L10a OS=Rattus norvegicus OX=10116 GN=Rpl10a PE=1 SV=2 - [RL10A_RAT]	3	3	4	12	1.00251	1.17674	1.22776	1.15629	0.807746	1.03716	1.05356	0.936846	1.20953	0.947473	1.15661	1.01179	0.94409	0.944594	1.10058	0.595334	1.08732	1.03013	0.843006	0.945939	1.07411	0.611268	1.30528	1.15233	0.914919	0.995416	0.859583	1.02368	0.993972	1.02124	1.11389	0.92438	1.12629	1.0863	1.19247	1.02107	73.425	18.43	24.8155	9.93506
P01041	Cystatin-B OS=Rattus norvegicus OX=10116 GN=Cstb PE=1 SV=1 - [CYTB_RAT]	1	2	3	13	0.547514	0.827756	0.784094	1.16244	1.1756	1.11183	0.971256	1.02915	1.48761	0.749802	1.21423	1.17579	0.539494	1.14204	0.658961	1.69743	0.767584	0.845955	0.828448	0.875511	0.693014	1.55874	0.800888	0.875901	0.937941	1.05068	1.19103	1.08729	0.899953	1.01882	1.04808	0.998384	0.983088	1.04881	1.35474	0.958789	73.2884	18.37	11.1886	6.30322
A0A0U1RVI9	RCG34378, isoform CRA_h OS=Rattus norvegicus OX=10116 GN=rCG_34378 PE=3 SV=1 - [A0A0U1RVI9_RAT]	9	4	5	11	0.862199		0.855603	1.03801	1.03739		1.07982	0.878589	0.84977		0.897475	0.943495	0.910148		1.18758	0.725127	1.08107		0.8191	0.878001	1.04978		1.11988	0.991495	0.809952		0.790659	0.858156	0.782163		1.19191	0.717776	1.07713		0.778162	1.10763	61.9184	14.23	28.5712	9.75928
F1LYS7	Sarcoglycan, delta OS=Rattus norvegicus OX=10116 GN=Sgcd PE=4 SV=3 - [F1LYS7_RAT]	1	3	5	16	1.32689	0.879561		1.13963	1.33318	0.823215		0.92375	0.849826	0.961409		0.899425	0.949713	1.13672		0.835944	1.16774	1.03365		0.974454	1.41229	0.946356		1.11446	1.17861	0.928067		1.10196	0.94184	0.935359		1.01186	1.44358	0.831106		1.28496	81.96	15.57	32.0669	9.1001
B5DEN5	Eukaryotic translation elongation factor 1 beta 2 OS=Rattus norvegicus OX=10116 GN=Eef1b2 PE=1 SV=1 - [B5DEN5_RAT]	1	2	4	15		0.808436	1.63404	0.862297		0.987997	0.922928	1.38861		0.766197	1.09562	0.910425		0.785253	0.708414	0.449734		0.954194	1.76194	1.28937		0.62362	0.785824	1.11292		0.89019	1.28192	1.07458		0.919583	0.856969	1.07291		1.07145	1.30522	0.705747	61.1731	17.78	24.6603	4.71631
Q6P9V1	Tetraspanin OS=Rattus norvegicus OX=10116 GN=Cd81 PE=1 SV=1 - [Q6P9V1_RAT]	2	2	2	11		1.10126	1.39731	0.98499		0.906532	0.873199	1.30205		1.13924	0.767513	1.16287		0.712987	0.870237	1.20131		0.771794	1.218	0.902598		0.85029	1.08387	1.1175		1.01436	0.895895	0.790415		0.541211	0.984487	1.17503		0.670407	0.90002	0.877594	99.94	18.22	25.8871	5.51611
P19939	Apolipoprotein C-I OS=Rattus norvegicus OX=10116 GN=Apoc1 PE=3 SV=1 - [APOC1_RAT]	3	2	2	19		0.93016				0.918097				0.437985				0.836489				0.750296				0.721273				1.73291				0.512299				0.855			64.3416	18.18	9.85427	9.08545
P19234	NADH dehydrogenase [ubiquinone] flavoprotein 2, mitochondrial OS=Rattus norvegicus OX=10116 GN=Ndufv2 PE=1 SV=2 - [NDUV2_RAT]	1	1	4	10			1.59704	0.770834			1.12978	1.61908			0.858627	1.42887			0.684378	0.846852			1.40633	1.28834			0.69822	1.13069			1.05195	1.01808			0.879829	1.43304			0.965471	0.778391	76.62	13.71	27.3609	6.68311
A0A0G2JSG6	Adenylate kinase 2, mitochondrial OS=Rattus norvegicus OX=10116 GN=Ak2 PE=1 SV=1 - [A0A0G2JSG6_RAT]	2	2	2	9	1.35026	0.93741	1.22652	0.905876	0.541259	1.03481	1.22674	1.14004	1.14253	1.03121	0.832323	1.09647	2.64497	0.99034	1.14552	1.14406	0.730454	0.942749	0.944552	0.965776	0.678555	1.24271	0.939443	1.09731	1.04708	1.12438	1.15198	0.946746	0.917876	0.946261	0.807728	1.27991	1.07916	1.17952	0.874977	0.968203	112.893	18.1	25.5132	7.45947
A0A0G2JSS9	Atlastin-3 OS=Rattus norvegicus OX=10116 GN=Atl3 PE=1 SV=1 - [A0A0G2JSS9_RAT]	2	2	7	30		1.346		1.01708		0.944208		0.969588		1.0973		0.665981		1.37503		1.0078		1.29578		0.971659		0.792229		0.857004		0.871481		1.01218		0.942819		1.11221		0.839438		1.03987	75.69	12.5	60.2112	5.5542
G3V8A5	Vacuolar protein sorting-associated protein 35 OS=Rattus norvegicus OX=10116 GN=Vps35 PE=1 SV=1 - [G3V8A5_RAT]	1	6	10	28	0.841286	1.17958	0.942698	1.14228	1.05875	0.999877	1.04711	0.955705	0.780202	0.985605	1.04752	0.896404	0.80599	0.932641	1.03922	0.618112	1.15733	1.04212	0.872918	0.999055	1.00645	0.62033	1.20985	1.03414	0.738264	0.919846	0.923266	0.995198	0.78655	1.20938	1.35072	0.865723	1.02447	0.870125	0.874497	1.27938	147.56	14.07	91.6688	5.43994
Q9EPF2	Cell surface glycoprotein MUC18 OS=Rattus norvegicus OX=10116 GN=Mcam PE=1 SV=2 - [MUC18_RAT]	1	6	14	65	1.02405	1.17144	1.44836	0.782248	0.801649	1.09774	0.884573	1.10698	1.44279	0.80345	0.987267	1.02345	1.24206	0.97591	0.709567	0.815297	0.709859	0.920558	1.17494	0.997687	0.676822	0.987958	0.872335	1.04831	1.01322	0.892058	1.41036	1.01739	1.15522	0.941125	1.18188	1.05447	1.05757	0.710691	0.907796	0.883739	181.362	18.06	71.2822	6.0874
F1LM47	Succinate--CoA ligase [ADP-forming] subunit beta, mitochondrial OS=Rattus norvegicus OX=10116 GN=Sucla2 PE=1 SV=1 - [F1LM47_RAT]	1	9	9	38	0.787526	1.17353	0.651042	0.980725	0.960613	0.918741	1.35048	0.944539	0.728458	0.993375	0.895253	0.823691	0.541813	0.995081	1.0999	0.884916	1.64324	0.969805	0.579609	0.915461	0.879541	1.45906	1.15473	0.991267	0.98561	0.85633	0.875459	0.978575	0.711469	1.22563	0.992713	0.486557	1.12214	1.04781	0.986046	1.02919	174.77	13.55	50.2742	7.69385
B0BNK1	RAB5C, member RAS oncogene family OS=Rattus norvegicus OX=10116 GN=Rab5c PE=1 SV=1 - [B0BNK1_RAT]	4	2	3	5	1.08885	1.22558	0.792513		1.49102	0.90389	0.878801		0.932475	1.03881	1.01388		1.10043	1.27176	1.05375		1.23148	0.922015	0.594742		1.35988	1.24481	0.944472		1.07047	0.909503	0.83534		1.06711	0.999815	1.07387		1.16274	0.780556	0.941491		40.1	12.96	23.4108	8.41162
P43278	Histone H1.0 OS=Rattus norvegicus OX=10116 GN=H1f0 PE=2 SV=2 - [H10_RAT]	1	3	4	22	0.699057	1.04536	1.20916	1.06943	1.23218	0.807017	1.36531	1.20704	1.20856	1.0979	1.18181	1.35334	0.489912	0.704765	0.744079	0.468679	1.24683	1.01847	0.86385	1.06405	1.20798	0.267425	1.17758	1.08778	0.795697	0.940304	1.29378	1.05289	1.43007	1.05573	1.75498	0.747651	0.764091	1.00989	1.00779	1.02134	112.357	15.98	20.8722	10.9019
B2RYS2	Cytochrome b-c1 complex subunit 7 OS=Rattus norvegicus OX=10116 GN=Uqcrb PE=1 SV=1 - [B2RYS2_RAT]	1	2	2	28	1.20926	0.889232	1.30932	0.829758	0.723366	0.918299	1.07723	1.46827	1.26607	0.744229	0.734244	1.45046	1.56213	0.813535	0.682491	0.887081	0.992636	0.933022	1.53212	1.16825	0.852074	1.55747	0.591228	1.04216	0.928105	1.13251	0.999618	0.974706	1.26955	0.998723	0.762218	1.68112	0.890138	1.38994	1.0809	0.848244	187.88	18.02	13.5499	9.30518
Q9Z0V5	Peroxiredoxin-4 OS=Rattus norvegicus OX=10116 GN=Prdx4 PE=2 SV=1 - [PRDX4_RAT]	1	1	5	60			1.16175				1.32402				1.16659				1.45976				1.50381				1.25814				1.05845				1.31398				1.27254		200.169	17.95	30.9881	6.65381
P08934	Kininogen-1 OS=Rattus norvegicus OX=10116 GN=Kng1 PE=2 SV=1 - [KNG1_RAT]	1	1	11	73				1.0414				0.842338				1.2561				1.08325				1.24611				0.640687				1.32981				0.81497				0.852253	248.67	14.24	70.8888	6.80029
A0A0G2JTG7	Heterogeneous nuclear ribonucleoprotein H OS=Rattus norvegicus OX=10116 GN=Hnrnph1 PE=1 SV=1 - [A0A0G2JTG7_RAT]	6	4	6	19	0.712151	0.959757	0.898861	1.09462	1.21472	1.02226	1.15565	1.03636	0.837537	0.89597	0.958956	0.843658	1.39951	1.08676	0.979437	1.0047	1.121	1.12813	1.13235	1.20322	1.57562	0.816411	0.948077	2.33166	0.952565	1.27261	1.02453	1.12501	1.12097	1.0147	0.776376	0.985756	0.800144	0.958891	0.931824	1.06737	154.805	17.82	49.1684	6.30322
Q9QWE9	Glutathione hydrolase 5 proenzyme OS=Rattus norvegicus OX=10116 GN=Ggt5 PE=2 SV=1 - [GGT5_RAT]	1	1	5	21	0.725905	0.98418	1.20155	0.965208	0.984016	1.20446	1.26323	0.80935	0.997768	0.714112	1.28755	1.30661	0.968246	1.1025	0.996183	1.42682	1	1.08279	1.17194	1.04506	0.819006	0.868295	1.22802	1.04523	0.92934	0.97701	1.44123	1.22347	0.921923	0.853264	1.3216	1.36405	0.999227	0.754715	1.71185	1.25801	109.86	12.06	61.5699	7.56201
D4AC23	T-complex protein 1 subunit eta OS=Rattus norvegicus OX=10116 GN=Cct7 PE=1 SV=1 - [D4AC23_RAT]	1	1	6	23	0.868908	1.40175	0.833999	0.66909	1.23732	1.09355	1.15455	1.06125	0.740836	1.41048	1.01263	0.787733	0.821333	1.26066	1.48466	2.24578	1.0688	1.21066	0.500413	0.800877	1.15884	0.721486	1.28113	1.32062	0.787735	1.01736	0.983191	1.00244	0.899722	1.09713	1.35129	1.32694	1.19953	0.845951	1.03121	1.35135	161.635	13.6	59.6202	8.00146
Q62894	Extracellular matrix protein 1 OS=Rattus norvegicus OX=10116 GN=Ecm1 PE=1 SV=2 - [ECM1_RAT]	1	3	6	14	1.32266	1.01735	1.58855	1.04841	0.82224	0.979464	0.911585	1.15836	1.57594	0.775853	1.04104	1.7051	1.60011	1.07727	0.824309	1.12331	0.958003	0.957836	1.822	1.15854	1.04067	1.10648	0.490146	0.921924	1.49845	1.44895	1.11508	1.50139	1.32174	0.853914	0.564708	2.72617	0.911578	1.48497	1.25036	1.19322	72.1467	8.19	63.208	6.87354
M0R735	Heterogeneous nuclear ribonucleoprotein Q OS=Rattus norvegicus OX=10116 GN=Syncrip PE=1 SV=2 - [M0R735_RAT]	4	2	6	16	0.794973	1.03523	0.813569	1.13332	1.11055	0.971308	0.967983	0.927889	1.03632	1.16218	0.995145	0.970767	0.571991	1.12123	1.22549	0.796524	1.02822	1.00198	0.806997	0.878573	0.944512	0.822614	1.18042	0.993789	0.955741	1.00627	0.929798	0.911952	0.825884	0.956218	1.14452	0.829698	1.18289	0.985589	0.984405	1.11751	74.69	10.32	62.6333	7.56201
A0A0G2K7P7	Mitochondrial carrier 2 OS=Rattus norvegicus OX=10116 GN=Mtch2 PE=1 SV=1 - [A0A0G2K7P7_RAT]	2	1	3	4																																					39.73	12.24	26.9811	8.00146
G3V7Q7	IQ motif containing GTPase activating protein 1 (Predicted), isoform CRA_b OS=Rattus norvegicus OX=10116 GN=Iqgap1 PE=1 SV=1 - [G3V7Q7_RAT]	1	10	18	48	0.487256	1.05193	0.655471	1.08914	1.13111	0.792902	1.3132	1.07243	1.0775	1.2582	0.997485	0.861575	0.619399	0.934386	0.950926	1.05605	1.05326	1.41891	0.877378	1.16713	1.3442	0.616167	1.14705	0.987786	0.852587	0.964487	0.78972	0.902918	0.871313	1.27791	1.3317	1.00772	0.613477	1.06349	0.970006	1.05098	204.74	12.43	188.714	6.43018
A0A140TAB9	Protein-L-isoaspartate O-methyltransferase OS=Rattus norvegicus OX=10116 GN=Pcmt1 PE=1 SV=1 - [A0A140TAB9_RAT]	2	1	1	1		0.824924				0.823614				0.885221				0.9204				0.84302				0.921861				1.34546				0.776246				0.628646			31.43	17.35	21.1788	6.88818
F7EPH4	Pyrophosphatase (inorganic) 1 OS=Rattus norvegicus OX=10116 GN=Ppa1 PE=1 SV=1 - [F7EPH4_RAT]	2	1	3	3				1.12092				0.945794				2.0942				0.899468				1.09024				0.863012				0.957789				1.70758				0.801088	59.21	9.69	32.7501	5.46533
P62909	40S ribosomal protein S3 OS=Rattus norvegicus OX=10116 GN=Rps3 PE=1 SV=1 - [RS3_RAT]	3	3	4	8	1.40671		1.08036	0.799496	1.36076		1.10391	0.984252	0.711018		1.05349	0.874901	0.53897		1.02622	0.581674	1.25709		0.923909	0.926137	1.60948		1.19175	0.946876	0.96727		1.09203	0.715518	0.628288		1.21728	1.11066	0.507646		0.943564	0.678607	55.4	11.93	26.6574	9.65674
Q9JHL4	Drebrin-like protein OS=Rattus norvegicus OX=10116 GN=Dbnl PE=1 SV=1 - [DBNL_RAT]	1	2	4	10	1.47714	0.886645	1.50991	1.13238	1.56597	1.13679	0.961789	1.3832	1.28989	0.796582	1.4641	1.09769	3.03461	1.00473	0.925425	0.682624	2.00966	0.97378	1.57187	1.31357	2.74192	0.750542	0.888737	1.25458	1.74018	1.17005	1.18956	1.55854	1.12651	1.06221	0.92871	1.09317	0.999203	1.24982	1.29862	1.1215	89.6	13.53	48.5825	4.91943
D4ADD7	Glutaredoxin 5 OS=Rattus norvegicus OX=10116 GN=Glrx5 PE=1 SV=1 - [D4ADD7_RAT]	1	1	2	2				0.999335				1.2355				1.1785				1.06116				1.01229				1.10768				1.11395				1.19216				0.959775	51.62	17.11	16.4215	7.28369
P35565	Calnexin OS=Rattus norvegicus OX=10116 GN=Canx PE=1 SV=1 - [CALX_RAT]	1	6	10	52	0.838937	1.09684	0.93039	1.05348	1.38245	1.08468	0.853844	0.961694	0.985227	1.01843	1.17984	0.826008	0.585171	1.07201	1.10724	1.34508	1.05726	0.956032	1.05319	1.02233	1.11428	0.837953	1.12551	1.14249	1.09938	0.878163	1.05115	0.994302	0.881391	0.940737	1.33807	1.09926	1.14778	0.933596	1.22516	1.23583	185.88	14.72	67.2126	4.62744
A0A0G2K9Y5	Similar to histidine-rich glycoprotein OS=Rattus norvegicus OX=10116 GN=Hrg PE=1 SV=1 - [A0A0G2K9Y5_RAT]	3	6	10	64	0.811158	0.815935	0.857807	1.32589	0.566134	0.837001	0.960413	0.970958	1.51232	0.814967	1.05424	1.35296	0.481802	0.891011	0.781837	1.19072	0.709407	0.886505	0.993171	1.23684	0.860138	1.35884	0.737389	0.694198	1.31423	1.02695	1.58726	1.74275	0.766243	0.973267	0.493215	0.771053	1.07708	0.946716	1.75003	1.11346	213.136	17.09	57.8902	7.81104
F1LPM3	Sorbin and SH3 domain-containing protein 2 OS=Rattus norvegicus OX=10116 GN=Sorbs2 PE=1 SV=2 - [F1LPM3_RAT]	3	10	17	92	1.0771	0.953267	2.198	0.741032	0.451137	0.658957	0.882798	0.50074	2.07327	0.722525	0.784226	1.55725	1.8166	0.706901	0.574683	0.269886	0.615289	1.1654	1.17148	1.79373	0.80901	0.507338	1.03704	1.03531	0.626327	1.59615	1.5183	1.02033	2.13652	0.998882	1.1367	0.579748	0.609364	0.897863	1.32615	0.618495	403.257	15.72	134.055	8.41162
A0A0G2JVP4	Uncharacterized protein OS=Rattus norvegicus OX=10116 PE=1 SV=1 - [A0A0G2JVP4_RAT]	3	4	6	20	0.82659	0.781979	0.658478	0.99457	0.952816	0.62472	1.13673	0.36338	1.02046	1.21488	1.03318	0.950246	0.479594	1.57729	0.771945	0.713032	1.53986	1.32359	0.546689	0.724207	1.56487	0.993051	0.974101	0.670766	2.50371	1.49978	1.13292	1.16342	0.735438	0.788036	1.16423	0.537124	1.64723	1.23943	0.828673	1.51709	154.74	14.04	51.6758	6.52197
P13221	Aspartate aminotransferase, cytoplasmic OS=Rattus norvegicus OX=10116 GN=Got1 PE=1 SV=3 - [AATC_RAT]	1	1	5	8		1.12785				0.984154				1.30921				1.12508				1.00006				1.59035				0.991177				1.01076				0.938519			47.84	10.17	46.3995	7.21045
P62634	Cellular nucleic acid-binding protein OS=Rattus norvegicus OX=10116 GN=Cnbp PE=2 SV=1 - [CNBP_RAT]	2	3	3	20	1.03209	0.788774	1.15382	0.71301	1.6709	0.960353	1.03709	1.21216	0.762436	1.00579	1.21902	0.873466	2.01649	0.760275	0.88829	0.373026	1.91425	1.16052	1.68411	1.41029	1.98125	0.522747	0.82174	1.16559	1.70769	1.19556	1.32018	1.33535	1.3286	1.56263	1.16916	0.904492	0.730311	0.797617	1.12541	0.819828	97.98	16.95	19.4496	7.7085
B2RYM3	Inter-alpha trypsin inhibitor, heavy chain 1 OS=Rattus norvegicus OX=10116 GN=Itih1 PE=1 SV=1 - [B2RYM3_RAT]	1	7	10	35		0.903551	0.814689	1.19534		0.60109	1.25837	0.734835		1.02052	1.34302	0.985179		1.10251	1.38602	1.30548		1.019	0.489119	0.892584		1.04541	1.37418	0.854785		0.956953	1.30713	0.880846		0.847429	0.911173	0.889284		0.762267	1.08166	0.938683	123.58	14.49	100.526	6.85889
M0R594	Serine protease inhibitor Kazal-type 3-like OS=Rattus norvegicus OX=10116 GN=LOC100911558 PE=4 SV=1 - [M0R594_RAT]	2	1	1	3			0.273899	0.0954878			15.3878	1.17317			0.173868	0.297695			0.674723	1.25934				0.204442			3.30402	2.75121			0.171209	3.64186			0.391183	0.536623			0.129934	0.0663919	59.76	16.92	6.94354	8.07471
P50503	Hsc70-interacting protein OS=Rattus norvegicus OX=10116 GN=St13 PE=1 SV=1 - [F10A1_RAT]	1	2	6	20	0.702938	0.960981	1.28168	1.00602	1.1426	1.05075	0.968712	1.19448	1.52873	0.822067	1.13457	1.04969	1.10115	0.962735	0.719694	0.797554	0.904111	0.905614	1.29288	1.1222	0.961014	0.787992	0.772854	1.02439	0.850361	0.987678	1.01039	1.17822	1.20426	1.0114	0.986326	1.26477	0.972219	0.908137	1.03463	0.917407	89.9938	14.95	41.2534	5.38916
P14942	Glutathione S-transferase alpha-4 OS=Rattus norvegicus OX=10116 GN=Gsta4 PE=1 SV=2 - [GSTA4_RAT]	1	2	4	14	0.623056	0.937583	0.710915		1.28377	1.18782	1.0069		1.0713	1.28722	0.975708		0.586278	1.23893	0.935052		1.0217	1.01917	0.793507		0.859037	1.17839	0.755859		1.26339	0.990001	0.877161		0.67523	0.905125	0.761627		1.09656	1.28381	1.20898		99.2233	16.67	25.4934	7.32764
P84083	ADP-ribosylation factor 5 OS=Rattus norvegicus OX=10116 GN=Arf5 PE=1 SV=2 - [ARF5_RAT]	1	1	2	9	0.786001	1.02017	0.871356	1.05507	1.06686	1.00961	1.0707	0.807954	0.909553	1.226	1.03983	0.784736	0.671497	1.14746	1.01322	1.17333	1.00134	0.950347	0.696041	0.844295	1.0538	1.21463	1.1206	0.92121	0.944431	0.894135	0.926944	0.898722	0.771954	1.07169	1.08573	0.734051	1.13262	0.90267	1.06766	1.17394	47.07	16.67	20.5166	6.78564
B2RZB6	U6 snRNA-associated Sm-like protein LSm8 OS=Rattus norvegicus OX=10116 GN=Lsm8 PE=1 SV=1 - [B2RZB6_RAT]	1	1	1	2																																					31.09	16.67	10.3963	4.4751
Q5XIM9	T-complex protein 1 subunit beta OS=Rattus norvegicus OX=10116 GN=Cct2 PE=1 SV=3 - [TCPB_RAT]	1	3	6	19	0.634051		0.929473	1.18517	1.18922		0.969499	0.922612	0.85747		1.16112	0.912734	0.627543		1.09566	0.928873	0.91686		0.774404	0.898538	1.09874		1.36037	0.978746	1.33813		1.02558	0.880743	0.815177		1.50901	0.815981	1.05489		0.967012	1.19382	102.49	12.71	57.4221	6.45557
D3ZUB0	Reticulocalbin 1 OS=Rattus norvegicus OX=10116 GN=Rcn1 PE=1 SV=1 - [D3ZUB0_RAT]	1	2	5	20	0.90866	0.675734	1.69757	0.801547	0.746204	0.823129	0.841765	1.46388	1.48347	0.673051	1.14929	1.50774	1.55626	0.896271	0.631022	0.953628	0.667785	0.78726	1.72414	1.4307	0.693689	0.859957	0.608577	1.21042	0.726582	0.947029	1.22116	1.2153	1.38213	0.762157	0.838374	1.7423	0.831783	1.16163	1.43043	0.815027	92.07	16.62	38.0666	4.81787
G3V8U8	Branched-chain-amino-acid aminotransferase OS=Rattus norvegicus OX=10116 GN=Bcat2 PE=1 SV=1 - [G3V8U8_RAT]	2	2	6	15	1.08919	1.19104	0.659094	1.01245	1.43338	1.26193	0.886149	0.851233	0.719136	1.16986	0.768905	0.753706	1.03182	1.24518	1.27892	1.07925	1.14486	1.14085	0.928669	0.790706	1.32975	1.12846	1.22618	0.987945	1.18196	0.975491	0.840909	0.776999	0.865277	1.11577	1.05851	0.867084	1.37047	0.982225	0.913249	1.34325	100.36	12.21	44.2009	8.1626
P04631	Protein S100-B OS=Rattus norvegicus OX=10116 GN=S100b PE=1 SV=2 - [S100B_RAT]	1	1	1	1			0.781762				1.47482				0.731247				0.90123				1.70167				0.636515				1.89274				0.396125				1.00016		36.56	16.3	10.737	4.55127
Q00657	Chondroitin sulfate proteoglycan 4 OS=Rattus norvegicus OX=10116 GN=Cspg4 PE=1 SV=2 - [CSPG4_RAT]	2	13	23	98	1.04296	1.0415	1.20704	1.05883	1.1092	0.959961	0.962588	0.868758	0.679917	1.10392	1.04809	0.886678	0.93303	1.12311	1.18871	0.847762	1.1788	1.12692	0.893246	0.934604	1.14886	0.923766	1.38695	1.15683	1.05531	0.987981	0.873912	0.972002	0.797614	1.00697	1.15774	0.69017	1.26615	0.881906	0.918487	1.30727	379.533	12.38	251.754	5.47803
A0A0G2K0D3	Leiomodin-1 OS=Rattus norvegicus OX=10116 GN=Lmod1 PE=1 SV=1 - [LMOD1_RAT]	1	4	8	55	0.821749	1.0167	2.62507	0.842425	0.863104	0.922419	0.952137	1.17042	0.863683	0.974856	0.984481	0.783898	1.7272	0.830117	0.725614	0.373674	1.01642	1.38389	1.65065	1.22428	1.21248	0.487386	0.946072	1.05063	0.523942	0.979641	0.837835	0.906864	1.11307	1.06147	1.52485	0.595654	0.765254	1.11806	0.776349	1.30704	170.798	15.29	66.1756	9.34912
Q3KR94	Vitronectin OS=Rattus norvegicus OX=10116 GN=Vtn PE=1 SV=1 - [Q3KR94_RAT]	2	2	5	14				1.11034				1.16617				1.68177				1.05829				1.2962				1.36864				1.20173				0.741339				0.697067	76.4671	12.34	54.6902	6.04932
Q27W01	RNA-binding protein 8A OS=Rattus norvegicus OX=10116 GN=Rbm8a PE=1 SV=1 - [RBM8A_RAT]	1	1	2	5			1.14153	0.624257			0.757254	1.11547			0.803239	0.829432			0.672342	0.594208			1.74083	0.632461			0.47838	0.957526			1.24068	0.748159			0.713835	0.733231			0.700424	1.02619	84.75	16.09	19.8767	5.71924
A0A0H2UHL3	Adipocyte enhancer-binding protein 1 OS=Rattus norvegicus OX=10116 GN=Aebp1 PE=4 SV=1 - [A0A0H2UHL3_RAT]	2	6	13	60	0.7501	0.830442	0.785098	0.963367	1.23576	0.885234	0.963765	1.14263	0.819452	1.14209	1.01893	0.797259	0.530455	0.892746	1.82959	1.29789	1.32517	0.880289	1.03798	0.97607	1.02805	0.820356	1.27359	0.899833	1.02632	0.777314	0.814311	0.795034	0.590631	0.68439	1.22157	1.09212	1.0986	0.744489	0.98893	1.66873	225.257	12.51	127.91	5.19873
Q9EPC6	Profilin-2 OS=Rattus norvegicus OX=10116 GN=Pfn2 PE=1 SV=3 - [PROF2_RAT]	2	2	2	9	1.47285		0.80587	1.11527	1.27803		0.705682	1.11432	1.00937		0.911517	1.16209	1.14963		0.954657	1.02301	1.06304		1.05337	0.974703	1.20543		0.817945	1.05086	1.09359		0.896737	1.02382	0.850914		0.821593	1.08077	1.03314		0.924398	1.12358	81.6533	15.71	14.9923	6.99072
A0A0G2K0I3	Nicotinamide phosphoribosyltransferase OS=Rattus norvegicus OX=10116 GN=Nampt PE=1 SV=1 - [A0A0G2K0I3_RAT]	2	1	4	9	1.03661				1.27279				0.895701				0.826145				1.00408				0.959048				0.777372				0.766928				1.41294				41.19	11.92	54.0579	8.00146
P62755	40S ribosomal protein S6 OS=Rattus norvegicus OX=10116 GN=Rps6 PE=1 SV=1 - [RS6_RAT]	2	1	4	7				0.98039				0.859708				0.807958				0.525193				0.985492				1.13923				0.873861				0.651333				1.06961	35.5	11.65	28.663	10.8433
P70470	Acyl-protein thioesterase 1 OS=Rattus norvegicus OX=10116 GN=Lypla1 PE=1 SV=1 - [LYPA1_RAT]	1	2	3	5		2.31289				1.08882				1.79747				1.71255				0.822452				2.83371				1.86712				1.05265				1.13901			77.93	15.65	24.6923	6.50732
P11507	Sarcoplasmic/endoplasmic reticulum calcium ATPase 2 OS=Rattus norvegicus OX=10116 GN=Atp2a2 PE=1 SV=1 - [AT2A2_RAT]	6	7	14	42	0.73261	1.48149	0.843623	0.646023	1.31589	1.13639	0.912569	0.944869	0.666544	1.35579	0.871708	0.674703	0.760988	1.17332	1.03683	1.28389	1.24074	1.25948	0.805304	0.843408	1.97646	0.717445	1.3729	1.164	0.930008	0.866942	0.70869	0.761404	0.81709	1.17181	1.17276	1.08426	1.1522	0.912237	0.79194	0.977402	240.737	12.27	114.694	5.33838
A0A0G2JSI0	Dimethylaniline monooxygenase [N-oxide-forming] OS=Rattus norvegicus OX=10116 GN=Fmo3 PE=1 SV=1 - [A0A0G2JSI0_RAT]	2	4	6	23	0.88872	1.17076	0.804356	1.76834	1.22558	0.890929	0.962489	1.40927	0.841908	1.2821	0.802553		0.828147	1.32516	1.36488	1.16235	1.29678	1.25215	0.974703	0.725145	1.28215	0.799366	1.24983	0.893429	0.988726	0.879785	0.800475		0.828896	1.10153	1.04049		1.1917	1.11813	0.823135		223.715	14.12	59.9374	8.04541
Q5U1X1	Oligoribonuclease, mitochondrial OS=Rattus norvegicus OX=10116 GN=Rexo2 PE=2 SV=1 - [ORN_RAT]	2	1	2	3																																					38.77	15.61	26.7346	7.15186
Q68FR6	Elongation factor 1-gamma OS=Rattus norvegicus OX=10116 GN=Eef1g PE=2 SV=3 - [EF1G_RAT]	1	3	6	19	0.690514	1.14962	0.728268	1.13951	1.2947	0.980547	1.14391	0.841772	0.771242	1.18393	1.02967	0.862092	0.482503	1.01712	1.16925	0.671183	1.21796	1.05633	0.569086	1.08108	1	0.621816	1.5155	1.1674	0.928555	0.920371	0.895046	0.905574	0.649957	1.1652	1.43761	0.816714	1.27554	0.815254	1.01552	1.2152	77.5148	10.07	50.0292	6.7417
F7EWC1	Vasodilator-stimulated phosphoprotein OS=Rattus norvegicus OX=10116 GN=Vasp PE=1 SV=2 - [F7EWC1_RAT]	2	1	5	22			2.09381	0.942819			0.871819	1.01598			0.818747	0.630116			0.651661	1.64683			2.00218	1.7108			0.689535	1.00983			1.04725	1.00207			0.790787	1.58855			0.975166	0.919978	75.95	15.51	39.461	8.67529
D3ZJ32	Extended synaptotagmin 2 OS=Rattus norvegicus OX=10116 GN=Esyt2 PE=1 SV=3 - [D3ZJ32_RAT]	1	4	8	21	1.03579	1.16893	1.04153	1.02661	0.745864	1.01589	1.04634	0.87166	0.672505	1.22528	0.999164	0.942889	0.720378	1.17671	1.08767	0.862453	0.925802	1.14435	0.778517	1.03749	0.996137	0.726364	1.4252	0.99047	1.06747	1.07653	1.05972	0.940173	0.62911	1.27557	1.11766	0.770204	1.19729	0.901161	0.849735	1.1759	116.07	12.43	93.8922	8.23584
P12368	cAMP-dependent protein kinase type II-alpha regulatory subunit OS=Rattus norvegicus OX=10116 GN=Prkar2a PE=1 SV=4 - [KAP2_RAT]	2	1	4	5							1.00008				1.21586				1.20597				0.999482				1.13654				1.63375				1.64755				0.741339		45.46	15.46	45.4517	4.93213
Q6AYS7	Aminoacylase-1A OS=Rattus norvegicus OX=10116 GN=Acy1a PE=1 SV=1 - [ACY1A_RAT]	2	2	5	17				1.06883				0.814692				1.80898				1.59331				2.17739				1.02358				1.75129				1.76272				1.42515	76.8933	10.54	45.7751	6.48096
Q9WUW3	Complement factor I OS=Rattus norvegicus OX=10116 GN=Cfi PE=2 SV=1 - [CFAI_RAT]	2	5	8	19	1.43816		2.09595	0.947146	0.762285		0.871795	1.0537	1.30064		1.23574	1.44249	2.52615		0.575726	0.659602	0.859636		1.16471	1.19416	1.03579		0.640372	0.787699	1.1047		1.94948	1.17621	0.962578		0.761469	2.67869	1.14722		1.55158	0.500216	113.855	13.08	67.2536	7.41553
P62268	40S ribosomal protein S23 OS=Rattus norvegicus OX=10116 GN=Rps23 PE=1 SV=3 - [RS23_RAT]	3	1	2	4		1.14179	0.749122			0.949241	1.17428			1.02771	1.17336			1.16572	1.21493			0.93188	0.644602			0.908609	1.29106			0.975943	0.959222			1.11257	1.5142			0.732479	1.08963		41.1	15.38	15.7977	10.4917
F1LZC5	Uncharacterized protein OS=Rattus norvegicus OX=10116 PE=4 SV=2 - [F1LZC5_RAT]	2	1	2	2																																					33.16	9.09	16.8188	9.78857
G3V7U4	Lamin-B1 OS=Rattus norvegicus OX=10116 GN=Lmnb1 PE=1 SV=1 - [G3V7U4_RAT]	2	3	8	28	0.93606	1.05415	0.950695	0.950056	0.944036	0.851647	1.03664	1.16748	0.982736	1.32723	0.913923	0.585447	1.02371	0.768849	1.20486	0.326134	1.06047	1.45923	1.07123	1.18266	1.49029	0.271099	1.20186	1.19009	0.817564	0.948799	1.15956	1.0285	1.87552	1.0276	1.6084	0.485195	0.800402	0.994435	0.505278	0.88794	114.465	11.75	66.6457	5.16064
D4A9L2	RCG34610, isoform CRA_c OS=Rattus norvegicus OX=10116 GN=Srsf1 PE=1 SV=1 - [D4A9L2_RAT]	1	3	3	11	0.853682	0.77938	1.05123	1.00043	1.61583	0.984359	1.02191	1.28171	0.643542	0.845191	1.05574	0.864462	1.7729	0.772127	0.706465	0.568169	2.07767	0.942629	1.52713	1.18228	1.82027	0.519295	0.696926	0.947449	1.58578	1.11158	1.09812	1.11934	1.18836	0.891255	1.06954	0.901609	0.858547	0.944268	1.0776	0.678328	79.77	15.32	27.7278	10.3599
F1MAA7	Laminin subunit gamma 1 OS=Rattus norvegicus OX=10116 GN=Lamc1 PE=1 SV=1 - [F1MAA7_RAT]	1	7	18	44	0.762997	1.44406	0.994096	1.11131	0.967805	1.17982	0.723528	0.749659	0.506726	1.56106	0.683413	1.06699	1.00409	1.25607	0.924995	0.628521	1.08219	1.36199	0.637408	0.946981	1.8335	0.771373	1.35102	0.975779	1.00024	1.06471	0.797522	0.855684	1.11514	1.56463	1.3593	0.755095	0.715723	1.06041	0.661693	1.32453	169.045	11.08	177.273	5.22412
Q6IMY8	Heterogeneous nuclear ribonucleoprotein U OS=Rattus norvegicus OX=10116 GN=Hnrnpu PE=1 SV=1 - [HNRPU_RAT]	2	6	9	28	0.486302	1.10703	1.15037	0.894022	1.42715	1.01149	0.997743	0.914442	0.78491	1.60435	0.777317	0.720055	0.428588	1.19936	0.974875	0.72435	1.48174	1.20504	0.702874	0.971996	1.48826	0.53804	0.994125	1.13787	0.649855	0.76426	0.703183	0.807845	0.816534	1.28126	1.05768	0.704505	1.37182	0.969936	0.89644	1.31453	112.315	14.41	87.6776	6.23975
G3V644	NADH dehydrogenase (Ubiquinone) flavoprotein 3-like, isoform CRA_a OS=Rattus norvegicus OX=10116 GN=Ndufv3 PE=1 SV=1 - [G3V644_RAT]	1	1	5	29																																					44.29	15.28	49.2702	8.83643
Q6P6T4	Echinoderm microtubule-associated protein-like 2 OS=Rattus norvegicus OX=10116 GN=Eml2 PE=1 SV=1 - [EMAL2_RAT]	1	2	8	26	1.03931	1.126	0.784408	1.09795	1.04414	0.9072	1.10972	0.79266	0.962061	1.11463	0.901501	1.03602	0.914891	1.1804	1.35773	1.16224	1.12795	1.04066	0.743892	0.879452	0.990085	1.21837	1.26416	0.970991	1.14481	0.997094	0.7967	0.9201	0.767874	1.17773	1.05304	0.93656	1.26823	0.943985	0.906101	1.23956	114.916	12.02	70.6662	6.30322
P24049	60S ribosomal protein L17 OS=Rattus norvegicus OX=10116 GN=Rpl17 PE=2 SV=3 - [RL17_RAT]	5	2	2	3				1.05444				1.01759				0.976514				0.632138				1.11928				1.22449				0.96326				1.04957				1.11324	34.01	15.22	21.3834	10.1841
D3ZJE2	Uncharacterized protein OS=Rattus norvegicus OX=10116 PE=3 SV=1 - [D3ZJE2_RAT]	4	1	2	6	0.676624	0.955635		1.21513	0.914773	0.938693		1.05677	0.888359	1.17647		0.987538	0.597699	0.905052		0.658783	1.11455	1.02513		0.981097	1.07031	0.67444		1.1793	0.768008	0.960257		1.13001	0.898914	1.10455		0.772442	0.95303	0.785331		1.08589	37.32	15.15	17.8354	9.26123
B2GUZ5	F-actin-capping protein subunit alpha-1 OS=Rattus norvegicus OX=10116 GN=Capza1 PE=1 SV=1 - [CAZA1_RAT]	1	1	3	7		1.31344				1.22637				1.1966				1.0883				1.26431				1.17105				1.28801				1.58086				1.75028			65.48	15.03	32.8893	5.69385
O70257	Syntaxin-7 OS=Rattus norvegicus OX=10116 GN=Stx7 PE=1 SV=4 - [STX7_RAT]	3	1	3	5	0.949741				1.06686				1.40069				1.27843				0.968796				0.633756				0.609398				1.46914				1.18026				51.1833	14.94	29.8323	5.42725
P04916	Retinol-binding protein 4 OS=Rattus norvegicus OX=10116 GN=Rbp4 PE=1 SV=1 - [RET4_RAT]	1	1	3	12		0.531337	0.745929	0.964406		0.928637	1.28083	1.14486		0.501275	1.07941	1.57951		0.799253	0.906325	1.61914		0.784016	1.42409	2.00748		0.986402	0.673694	0.987408		0.809532	1.37411	1.67866		0.788887	0.761729	0.878697		0.806028	1.71944	0.88597	50.92	14.93	23.2053	5.98584
E9PT65	Radixin OS=Rattus norvegicus OX=10116 GN=Rdx PE=1 SV=2 - [E9PT65_RAT]	2	1	9	45			1.17877	1.09888			0.986572	1.08109			1.23281	0.772431			1.0493	1.22088			1.30545	1.23598			1.01721	0.94874			1.35855	0.751922			0.883191	0.643436			1.19254	0.907521	154.532	13.38	68.443	5.74463
R9PXV7	Uncharacterized protein OS=Rattus norvegicus OX=10116 PE=1 SV=1 - [R9PXV7_RAT]	2	2	2	3			0.952697	1.11119			0.969785	1.09691			1.00575	1.13514			0.999673	1.22554			1.42234	0.961684			0.936368	0.983738			1.32152	1.1982			1.07632	1.16635			1.4131	1.17448	52.9	14.88	24.8724	7.40088
P37996	ADP-ribosylation factor-like protein 3 OS=Rattus norvegicus OX=10116 GN=Arl3 PE=1 SV=2 - [ARL3_RAT]	2	1	2	20	1.17044		0.879296	0.941774	2.122		1.04605	0.927658	0.80409		1.03877	1.74024	2.86729		1.17797	0.984544	1.23057		1.06101	0.779451	2.38015		1.01218	0.892134	1.51247		0.939098	0.752237	1.36116		1.08491	1.43262	0.638094		0.996874	0.952884	96.6533	14.84	20.4438	7.23975
F1M978	Inositol-1-monophosphatase OS=Rattus norvegicus OX=10116 GN=Impa1 PE=1 SV=1 - [F1M978_RAT]	2	2	4	11	0.661744	1.11293			1.26318	1.12296			0.957801	1.2591			0.653113	1.22321			1.09465	0.996092			0.933616	1.04035			1.00734	0.921684			0.78845	1.03209			1.20814	0.843224			48.2267	14.8	30.4754	5.2876
A0A0G2K905	Arp2/3 complex 34 kDa subunit OS=Rattus norvegicus OX=10116 GN=Arpc2 PE=1 SV=1 - [A0A0G2K905_RAT]	4	2	6	15																																					64	14.79	32.4824	8.01611
A0A0G2K7E5	Voltage-dependent calcium channel subunit alpha-2/delta-1 OS=Rattus norvegicus OX=10116 GN=Cacna2d1 PE=1 SV=1 - [A0A0G2K7E5_RAT]	5	5	10	29	1.0094	1.0715	0.586433		0.930598	1.18704	0.793338		1.20713	1.06937	0.994504		0.946959	1.14515	0.803317		0.918836	1.15917	1.01334		0.900058	1.21334	0.796347		1.05329	1.22479	1.01443		1.29108	1.1337	1.09988		1.0866	1.23383	1.36233		87.6157	11.72	122.65	5.19873
Q5RJK5	Chromobox 3 OS=Rattus norvegicus OX=10116 GN=Cbx3 PE=1 SV=1 - [Q5RJK5_RAT]	3	1	2	7	0.903516		1.32754	0.904915	0.766679		0.900335	1.00454	1.75465		1.22247	0.741535	1.41545		0.671624	0.615774	0.79145		1.49686	1.06549	0.754779		0.760298	1.28585	0.606901		1.22623	0.984845	1.56528		1.13739	1.28007	0.860861		1.04674	0.740597	46.77	14.75	20.7984	5.32568
D3ZH41	Cytoskeleton-associated protein 4 OS=Rattus norvegicus OX=10116 GN=Ckap4 PE=1 SV=2 - [D3ZH41_RAT]	1	3	4	11	0.683098	0.907728		1.1539	0.973982	0.872796		1.10404	0.925096	1.00113		0.987759	0.605921	0.805456		0.421347	0.962835	1.01576		1.16718	1.02883	0.447221		1.20706	0.801076	0.907505		1.25486	1.03983	0.982327		0.723741	1.04264	0.857745		0.961438	69.71	14.72	36.2937	4.81787
P45479	Palmitoyl-protein thioesterase 1 OS=Rattus norvegicus OX=10116 GN=Ppt1 PE=1 SV=1 - [PPT1_RAT]	1	1	3	4			1.74128				1.27142				1.37323				1.08635				1.69403				1.3665				1.31981				1.30976				1.40749		52.5133	14.71	34.4324	7.43018
Q5BJU0	RAS-related 2 OS=Rattus norvegicus OX=10116 GN=Rras2 PE=1 SV=1 - [Q5BJU0_RAT]	2	2	3	8	0.819045		0.721533	1.10276	1.51423		1.01488	1.02343	0.643456		0.840131	0.871829	0.563764		1.26778	1.87204	1.10817		0.618235	0.735206	0.954096		1.12377	0.894438	0.918551		0.713251	1.15883	0.519563		1.11975	0.958894	1.31227		0.954644	1.26776	87.8957	14.71	23.3847	6.01123
Q64240	Protein AMBP OS=Rattus norvegicus OX=10116 GN=Ambp PE=1 SV=1 - [AMBP_RAT]	1	4	5	19	0.812811	0.809205	1.34004	1.20883	0.407464	0.860614	0.921736	0.770423	1.11547	0.688152	1.14332	1.19596	0.97177	1.02636	1.09597	1.19819	0.771714	0.982317	0.838676	1.16563	0.95216	1.36999	0.910905	0.948246	1.01583	0.953213	1.09394	1.03849	0.729101	0.865089	0.614655	1.12472	1.33371	0.852633	1.24973	0.856831	124.81	12.32	38.826	5.99854
Q5U2Q3	Ester hydrolase C11orf54 homolog OS=Rattus norvegicus OX=10116 PE=1 SV=1 - [CK054_RAT]	1	1	2	5		0.760861		0.619855		1.18662		1.22204		0.880391		1.59596		1.02264		1.18824		0.972469		1.25718		1.51582		0.747743		1.13203		1.04006		1.13215		1.40315		1.48504		0.666454	42.52	14.6	34.9704	6.62451
F1LT36	Uncharacterized protein OS=Rattus norvegicus OX=10116 GN=Rps10l1 PE=4 SV=2 - [F1LT36_RAT]	6	1	2	14	0.395168	1.16606	1.40921	0.824758	1.39052	1.13802	1.00165	1.00417	1.21381	1.11175	1.13295	1.06201	0.501039	1.02547	0.99286	1.37618	1.0069	0.907946	0.796944	0.737034	0.912911	0.790343	1.0888	1.29729	0.960901	1.13471	0.907461	0.837543	0.589361	1.04238	1.31645	1.565	1.09545	0.815335	1.15844	1.02728	98.35	14.55	18.8808	10.0669
Q99PD6	Transforming growth factor beta-1-induced transcript 1 protein OS=Rattus norvegicus OX=10116 GN=Tgfb1i1 PE=1 SV=2 - [TGFI1_RAT]	1	4	5	61	1.59596	1.42633	1.85974	0.907933	1.32418	0.846776	0.871977	1.15398	0.747856	1.09576	0.909956	0.679228	1.87672	0.905149	0.755174	0.25885	2.09586	1.25364	1.31739	1.02894	2.10279	0.301994	1.00016	0.972071	1.05539	1.39071	0.820554	1.08817	1.42818	1.10496	1.17756	0.653074	0.550735	1.73029	0.740198	0.927634	251.99	14.53	50.0899	6.91748
F1LR02	Collagen type XVIII alpha 1 chain OS=Rattus norvegicus OX=10116 GN=Col18a1 PE=1 SV=2 - [F1LR02_RAT]	1	10	15	212	0.736296	1.11714	1.04608	0.868041	0.720408	0.803397	0.984466	0.798743	0.576906	1.29131	0.885504	0.776927	0.551582	1.0044	1.0908	0.525861	1.44301	1.27684	0.882478	1.05793	1.22585	0.641947	1.58486	1.18319	0.788645	0.932758	0.801187	1.09595	0.711865	1.4726	1.87344	0.674878	0.803882	0.820031	0.902997	1.39632	884.396	14.49	134.563	6.29053
D4A5F0	Family with sequence similarity 114, member A1-like 1 OS=Rattus norvegicus OX=10116 GN=Fam114a1l1 PE=4 SV=2 - [D4A5F0_RAT]	1	1	5	19	1.59099	1.03505	1.12572		0.968371	1.32859	1.0404		1.14751	1.2394	1.06728		1.16034	1.05701	1.03795		1.0228	1.00535	1.67407		1.05769	0.920883	1.04318		1.16885	0.94399	1.20692		1.01719	1.00468	0.961423		1.06506	1.05173	1.07198		82.0833	11.84	60.3397	4.64014
F1LSW7	60S ribosomal protein L14 OS=Rattus norvegicus OX=10116 GN=Rpl14 PE=1 SV=2 - [F1LSW7_RAT]	4	2	3	5			0.959241	1.09576			1.11971	0.980945			0.930888	0.90185			1.11181	0.436785			0.850688	1.05664			1.30183	1.18678			0.865542	0.997122			1.32238	0.751199			0.778492	1.18778	76.9367	14.49	23.308	11.0044
D4A5E5	Sarcoglycan, beta OS=Rattus norvegicus OX=10116 GN=Sgcb PE=4 SV=2 - [D4A5E5_RAT]	2	1	2	6	0.909726	1.15503	0.912901	1.09563	1.3855	1.08831	0.916771	0.780563	0.741642	0.99923	0.913672	0.767111	0.503677	1.35453	1.29616	0.782317	1.14342	1.15981	0.932029	0.929111	1.18591	0.92758	1.28679	1.13829	0.980006	0.892776	0.943514	1.02894	0.997686	0.836484	1.44645	0.661519	1.26764	0.914532	1.11609	1.41767	50.42	14.48	32.8258	8.6167
M0R3V4	Myeloid-derived growth factor OS=Rattus norvegicus OX=10116 GN=Mydgf PE=1 SV=2 - [M0R3V4_RAT]	1	1	2	9																																					55.83	14.46	17.9409	6.16357
P00787	Cathepsin B OS=Rattus norvegicus OX=10116 GN=Ctsb PE=1 SV=2 - [CATB_RAT]	2	1	3	8	0.952278			0.762652	1.286			1.50214	1.57955			1.69141	1.01678			1.0586	1.04332			1.18973	1.06097			1.07639	1.10126			1.25619	0.962497			1.54754	0.656833			0.757386	69.6667	10.62	37.4456	5.60498
Q9Z269	Vesicle-associated membrane protein-associated protein B OS=Rattus norvegicus OX=10116 GN=Vapb PE=1 SV=3 - [VAPB_RAT]	1	1	2	9	1.09046				0.791282				1.34627				2.17584				0.821601				0.892829				1.01325				1.51166				0.956703				66.3033	14.4	26.899	7.78174
G3V7Z4	Glia-derived nexin OS=Rattus norvegicus OX=10116 GN=Serpine2 PE=3 SV=1 - [G3V7Z4_RAT]	2	1	5	10																																					52.04	8.82	44.0213	9.68604
O55171	Acyl-coenzyme A thioesterase 2, mitochondrial OS=Rattus norvegicus OX=10116 GN=Acot2 PE=1 SV=1 - [ACOT2_RAT]	6	4	5	12	1.16943	1.14792	0.350158	0.733469	0.712758	1.19564	1.00835	0.993486	0.986911	1.17025	0.636252	0.87344	1.01842	1.1238	0.866425	0.980791	1.23108	1.05484	0.431289	0.795482	0.780189	2.09479	0.834674	0.754678	1.42851	0.943932	0.694432	0.950926	1.36362	1.18682	0.753544	0.929255	1.23371	1.20674	0.681258	0.648125	125.919	14.35	49.6697	7.82568
P80432	Cytochrome c oxidase subunit 7C, mitochondrial OS=Rattus norvegicus OX=10116 GN=Cox7c PE=1 SV=2 - [COX7C_RAT]	1	1	1	4			1.2936	0.947761			1.05064	1.11924			0.993073	1.3273			0.910119	1.00007			0.76072	0.857914			0.894443	0.731708			0.856803	0.962249			0.978098	1.12237			1.15982	1.06875	34.42	14.29	7.36993	11.0044
D3ZMX6	Syntrophin, beta 2 OS=Rattus norvegicus OX=10116 GN=Sntb2 PE=1 SV=3 - [D3ZMX6_RAT]	2	1	7	16	0.43284		0.790176		1.2852		1.06616		0.632293		1.08053		0.580463		0.901089		2.57101		0.74248		2.33089		1.25925		0.730456		0.818886		0.84931		1.90814		0.659998		0.922405		37.1833	9.77	56.4902	8.68994
P18163	Long-chain-fatty-acid--CoA ligase 1 OS=Rattus norvegicus OX=10116 GN=Acsl1 PE=1 SV=1 - [ACSL1_RAT]	1	1	7	23			0.863483	0.883368			1.23908	0.902705			0.982361	1.14697			1.22977	1.49584			0.793729	1.14673			1.31931	1.15117			0.803879	0.834287			1.02304	0.78596			0.885918	0.909069	67.83	10.87	78.1282	6.99072
Q6AY18	SAR1 gene homolog A (S. cerevisiae), isoform CRA_b OS=Rattus norvegicus OX=10116 GN=Sar1a PE=1 SV=1 - [Q6AY18_RAT]	1	1	2	8	1.45165	1.02174	1.03695	0.950076	0.734138	0.799589	1.05793	0.735037	0.762562	0.782007	0.987213	1.14919	2.57521	1.00811	1.23216	1.08151	0.695054	1.07694	1.18341	0.90042	0.955253	0.778046	1.02695	1.04012	0.709157	0.768192	0.950012	0.865003	0.974084	0.483349	0.832688	1.06575	1.0325	0.93645	0.998656	0.88361	81.19	14.14	22.3845	6.68311
A0A0A0MXW9	RNA-binding motif protein, X-linked-like-1 OS=Rattus norvegicus OX=10116 GN=Rbmxl1 PE=1 SV=1 - [A0A0A0MXW9_RAT]	6	3	5	10	1.2179		1.53303	0.947648	1.24679		0.907783	1.16468	1.2255		1.01357	1.33179	1.03257		0.83577	0.617781	1.19731		1.69116	1.07562	1.4336		0.815896	1.06102	0.918964		0.964302	1.17846	0.924526		1.00236	1.47771	0.780638		1.09045	0.95173	85.96	11.41	40.0461	9.83252
G3V8R1	Nucleobindin 2, isoform CRA_b OS=Rattus norvegicus OX=10116 GN=Nucb2 PE=1 SV=1 - [G3V8R1_RAT]	2	4	5	19	0.903738	0.73525	1.74653	0.853223	0.919327	0.976271	0.998115	1.51159	1.06362	0.665226	1.10233	1.43478	1.3804	0.802873	0.478182	0.84217	0.983258	0.820442	1.77665	1.49173	0.935509	0.763983	0.618677	1.19749	0.973099	1.04283	1.05528	1.14511	1.03899	0.914495	0.739996	1.84057	0.678384	1.22369	1.09472	0.920048	131.937	12.38	50.0862	5.10986
P19944	60S acidic ribosomal protein P1 OS=Rattus norvegicus OX=10116 GN=Rplp1 PE=3 SV=1 - [RLA1_RAT]	1	1	1	14	1.23617	1.08818			0.523616	0.9812			1.23913	0.701968			1.24903	0.646353			1.03992	1.1862			0.733699	0.850342			0.802267	0.941948			1.34977	1.03707			0.808524	1.34898			83.11	14.04	11.4907	4.32275
B2RYG6	Ubiquitin thioesterase OTUB1 OS=Rattus norvegicus OX=10116 GN=Otub1 PE=1 SV=1 - [OTUB1_RAT]	1	1	3	4			0.99465				0.939298				1.06704				0.944833				0.954267				0.882321				1.03853				0.93882				1.21359		32.49	10.33	31.2504	4.94482
G3V6T7	Protein disulfide-isomerase A4 OS=Rattus norvegicus OX=10116 GN=Pdia4 PE=1 SV=1 - [G3V6T7_RAT]	2	4	12	34	1.13778	0.953698	0.785234	1.1091	1.17635	1.02451	0.927545	0.976958	1.00787	1.00269	1.11455	1.00332	1.00381	1.13787	1.25004	1.01473	0.925422	0.895939	0.842119	0.987586	0.959409	0.994008	1.29426	0.992832	0.963212	0.865428	0.886217	0.902716	0.816631	0.847944	1.12992	0.892285	1.25168	0.911022	0.994106	1.06826	123.27	11.2	72.7027	5.14795
D3ZBS2	Inter-alpha-trypsin inhibitor heavy chain H3 OS=Rattus norvegicus OX=10116 GN=Itih3 PE=1 SV=3 - [D3ZBS2_RAT]	3	5	8	32	1.43582	0.960166	0.376155	1.24605	0.503605	0.815031	0.959922	0.758071	1.13434	1.21368	1.04539	1.39176	0.604654	1.1313	1.5004	1.47882	0.697514	1.13142	0.505866	1.00189	0.769789	1.44306	0.996052	0.796517	1.18854	1.0315	1.15893	1.04085	0.605823	0.880078	0.63566	1.21031	1.45574	0.847355	1.34831	0.990722	201.67	11.95	99.0057	6.31592
Q5XI32	F-actin-capping protein subunit beta OS=Rattus norvegicus OX=10116 GN=Capzb PE=1 SV=1 - [CAPZB_RAT]	2	2	2	5	1.52966			0.802322	1.01753			1.02947	0.851286				1.08304			0.899299	0.950923			0.516563	1.03613			0.927329	0.753847			1.18612	1.24917			1.49642	1.37191			1.0667	90.5867	13.97	30.6094	5.99854
D3ZWD6	Complement C8 alpha chain OS=Rattus norvegicus OX=10116 GN=C8a PE=1 SV=1 - [D3ZWD6_RAT]	1	4	5	9	1.71603	1.68002		1.20874	0.432124	0.895626	0.505936	0.650498	1.20951	1.05369		0.962604	0.79787	0.870357	1.43522	1.67818	1.2801	1.2128		0.325406	0.896285	1.74523	0.669743	1.33069	0.941112	0.646082	0.542432	1.3289	0.794765	1.04655		1.32318	1.42757	0.983624		1.49444	67.06	10.05	66.2303	5.96045
Q5M7U6	Actin-related protein 2 OS=Rattus norvegicus OX=10116 GN=Actr2 PE=2 SV=1 - [ARP2_RAT]	1	2	3	13		1.15787		1.04173		1.26289		0.70625		1.84518		0.706824		0.989824		0.629372		1.09141		0.701606		0.621001		1.25718		1.04309		0.927581		1.14388		0.510965		0.672527		1.12727	81.46	13.96	44.7052	6.7417
D3ZE63	Uncharacterized protein OS=Rattus norvegicus OX=10116 PE=4 SV=1 - [D3ZE63_RAT]	4	2	2	46	1.22607	0.787852	2.09804	0.886123	1.1206	0.933518	0.997288	1.24077	1.93041	0.707675	1.12777	1.4671	1.89212	0.93094	0.494984	0.974922	0.602742	0.902711	1.50886	1.32355	0.723085	1.0398	0.505428	1.01203	0.730441	1.07951	1.12536	0.960951	1.22796	0.847101	0.75061	2.1088	0.733592	1.38427	1.21863	0.74077	110.555	13.91	12.5973	7.89893
B0K020	CDGSH iron-sulfur domain-containing protein 1 OS=Rattus norvegicus OX=10116 GN=Cisd1 PE=3 SV=1 - [CISD1_RAT]	1	1	1	2		0.855379				0.898615				0.687905				1.02566				0.846818				0.841446				1.0508				0.745358				1.74447			46.75	13.89	12.0891	8.83643
G3V836	Clusterin OS=Rattus norvegicus OX=10116 GN=Clu PE=1 SV=1 - [G3V836_RAT]	3	2	5	22	1.10955	0.816682	1.57809	0.890721	0.57503	0.771688	0.62954	1.22468	1.11847	0.610051	1.00591	1.17762	1.35187	0.837178	0.479101	0.666768	1.03233	1.01409	1.58875	1.54603	0.779885	1.06823	0.472653	1.02264	1.35582	1.2954	1.16711	1.44138	0.791789	0.823977	0.528058	2.82045	0.790262	1.22606	1.11499	0.882216	113.9	13.65	51.3873	5.80811
A0A0G2K4R1	Protein phosphatase 1, regulatory subunit 12C OS=Rattus norvegicus OX=10116 GN=Ppp1r12c PE=1 SV=1 - [A0A0G2K4R1_RAT]	1	5	8	25	1.21097	0.917418	1.80378	0.976859	1.06079	0.985103	0.979485	0.973106	0.902112	0.741664	0.756473	0.83907	0.890186	0.793363	0.818486	0.381865	1.68973	1.17755	1.57248	1.21472	0.892152	0.490354	1.03678	1.09721	1.33458	1.15709	1.10858	1.15546	0.707891	1.00098	1.03263	0.751689	0.875507	0.856388	0.801499	0.982054	160.75	11.22	84.715	5.94775
D4A777	Family with sequence similarity 114, member A1 OS=Rattus norvegicus OX=10116 GN=Fam114a1 PE=1 SV=2 - [D4A777_RAT]	1	1	5	13																																					42.05	11.11	60.7199	4.65283
B2RZ78	Vacuolar protein sorting-associated protein 29 OS=Rattus norvegicus OX=10116 GN=Vps29 PE=1 SV=2 - [VPS29_RAT]	2	2	3	8	0.582457	1.41238	0.735164		1.80083	1.06474	1.11774		0.771439	0.884772	1.23341		2.44419	1.40741	1.04382		0.898908	0.752337	0.77505		3.04969	1.08707	1.22509		1.1225	1.00991	0.867787		1.58789	1.18748	1.39733		0.752312	1.0032	1.066		65.23	13.74	20.4556	6.78564
E2RUH2	Ribonuclease inhibitor OS=Rattus norvegicus OX=10116 GN=Rnh1 PE=1 SV=1 - [E2RUH2_RAT]	3	2	4	17	1.98944		1.19066	1.13068	1.62515		1.04318	1.1755	1.08106		0.975436	1.33023	1.10553		1.07659	1.19313	1.71503		1.35695	1.26352	2.26268		0.913146	1.33116	1.40884		1.08412	1.04216	1.03485		0.928867	1.82935	0.928489		1.11197	1.24118	133.537	10.31	49.8871	4.79248
Q3MHS9	Chaperonin containing Tcp1, subunit 6A (Zeta 1) OS=Rattus norvegicus OX=10116 GN=Cct6a PE=1 SV=1 - [Q3MHS9_RAT]	2	2	7	14		0.88844		0.686233		0.760622		1.19973		1.03947		0.925989		0.722381		1.33666		0.896733		1.46409		0.7847		0.74303		0.634447		1.31713		0.884659				0.71281			59.16	11.3	57.9807	7.07861
Q6P686	Osteoclast-stimulating factor 1 OS=Rattus norvegicus OX=10116 GN=Ostf1 PE=1 SV=1 - [OSTF1_RAT]	1	1	2	6		0.932074		0.960374		1.10722		1.35194		0.869336		1.09918		0.832321		0.896218		1.17865		1.26394		0.918845		0.954802		1.16286		1.00714		1.06849		1.37226		1.52932		0.825662	54.95	13.55	23.6539	5.68115
Q4KM74	Vesicle-trafficking protein SEC22b OS=Rattus norvegicus OX=10116 GN=Sec22b PE=1 SV=3 - [SC22B_RAT]	1	1	2	4			0.997437				0.942919				1.11552				1.04936				1.0353				1.06988				0.97078				1.08252				0.850673		76.06	13.49	24.7248	8.51416
A0A0H2UH99	60S ribosomal protein L24 OS=Rattus norvegicus OX=10116 GN=Rpl24 PE=1 SV=1 - [A0A0H2UH99_RAT]	2	1	3	6				0.938897				1.00175				0.894549				1.10439				1.10673				1.06316				0.952258				0.705769				1.09675	52.41	10.9	17.6649	11.356
P16303	Carboxylesterase 1D OS=Rattus norvegicus OX=10116 GN=Ces1d PE=1 SV=2 - [CES1D_RAT]	1	2	4	13	1.12596		0.794584	1.00261	0.921111	0.959624	1.45711	0.833292	1.50799	1.00689	0.918408	1.10791	1.10093	0.789367	1.01221	1.50647	1.07188	0.799171	0.704171	1.27177	0.453225	1.30691	1.47098	1.21378	1.03711	1.05921	1.57169	1.08435	2.28569	1.23669	0.927509	0.85927	0.957872	0.683135	1.19133	0.861315	90.79	10.62	62.1077	6.53662
A2VD12	Pre-B-cell leukemia transcription factor-interacting protein 1 OS=Rattus norvegicus OX=10116 GN=Pbxip1 PE=1 SV=1 - [PBIP1_RAT]	1	3	7	15		0.91724	1.0946			1.1259	0.945862			0.883825	1.05064			1.09313	1.24629			1.40835	1.52982			0.748079	0.885772			0.999415	1.01828			0.934447	1.2007			0.857674	0.947003		97.48	9.83	80.2269	5.41455
F1LZY6	Uncharacterized protein OS=Rattus norvegicus OX=10116 PE=1 SV=2 - [F1LZY6_RAT]	2	1	1	2	0.672514		0.486189		0.496964		0.665656		3.48462		0.746198		0.883444		0.629855		0.738607		1.31185		0.579034		0.38158		0.742125		1.57152		1.93904		0.413336		1.10342		0.737677		73.38	13.4	10.4761	4.71631
Q5M823	NudC domain-containing protein 2 OS=Rattus norvegicus OX=10116 GN=Nudcd2 PE=2 SV=1 - [NUDC2_RAT]	1	1	1	1				1.23751				0.903173				1.70761				1.31908				0.998649				0.94799				1.25801				1.61688				1.07147	37.36	13.38	17.6628	5.07178
B2RYJ7	ARP1 actin-related protein 1 homolog B OS=Rattus norvegicus OX=10116 GN=Actr1b PE=1 SV=1 - [B2RYJ7_RAT]	2	3	4	18	1.59801	1.40013	0.859258	0.990627	1.43371	1.04624	1.02746	0.960291	0.793368	1.41524	0.997587	0.943953	1.03203	1.10364	1.0595	0.774812	1.45595	1.36112	0.833693	0.972263	2.04276	0.735174	1.28452	1.13078	1.46739	1.06185	0.975641	1.06268	0.717177	1.44657	1.50854	1.04478	0.795585	1.03803	0.858602	1.11214	123.5	13.3	42.2547	6.40479
G3V9Z6	Septin 8 (Predicted) OS=Rattus norvegicus OX=10116 GN=Sept8 PE=1 SV=1 - [G3V9Z6_RAT]	12	1	4	23	0.98255	1.37201	0.782213	0.655446	1.0722	1.03948	1.00732	1.04976	0.739588	1.44928	1.08539	0.752949	0.919163	0.962342	1.28584	1.41756	1.16481	1.16975	0.965678	0.943548	1.25906	0.609494	1.23442	1.29505	0.86407	1.14862	0.873235	0.962251	0.859716	1.2627	1.3271	1.47798	1.00132	1.00528	1.06568	1.18583	131.321	13.29	49.8252	5.99854
F1LQI1	Hydroxyacyl glutathione hydrolase OS=Rattus norvegicus OX=10116 GN=Hagh PE=1 SV=2 - [F1LQI1_RAT]	2	1	3	9	0.787741		0.994269		1.79618		1.11485		0.49224		0.787017		3.13133		1.33726		1.25662		1.08347		2.58494		1.0384		1.47053		1.13684		1.09885		0.966984		0.890985		1.26249		58.5	13.27	34.1365	7.94287
G3V6S2	Cytoplasmic aconitate hydratase OS=Rattus norvegicus OX=10116 GN=Aco1 PE=1 SV=1 - [G3V6S2_RAT]	2	5	10	39	0.94286	1.14026	0.654376	0.889058	0.899125	1.04064	1.3939	0.755894	1.6859	1.33499	1.02046	0.974442	0.915297	1.1097	1.27436	1.11752	0.900935	1.01417	0.548073	0.782059	0.668842	1.34108	1.16267	0.821056	1.08305	1.05956	0.947039	0.807971	0.813941	1.22731	1.00232	0.782756	1.45217	1.0315	0.960109	1.02991	178.923	9.67	98.1304	7.38623
Q66WT9	Clathrin-assembly lymphoid myeloid leukemia protein OS=Rattus norvegicus OX=10116 GN=Picalm PE=1 SV=1 - [Q66WT9_RAT]	6	3	5	18		1.21614	1.11868	0.909338		1.15105	1.02571	0.791521		1.3654	1.02985	1.03078		1.14096	0.992852	0.671196		0.932981	0.973748	1.1127		0.79684	1.39234	1.39056		1.08885	0.893046	0.919371		1.30181	1.27586	1.02945		0.866035	1.03034	0.970057	126.4	13.23	64.6731	9.01221
Q499Q4	Phosphoglucomutase-1 OS=Rattus norvegicus OX=10116 GN=Pgm1 PE=1 SV=2 - [Q499Q4_RAT]	2	4	6	31		0.946159	0.605536	1.10906		1.26426	1.27354	0.916167		1.49405	0.857833	0.98672		1.3482	1.38952	1.44687		0.995823	0.644018	0.790615		1.36784	1.1326	1.14091		1.01352	0.887843	0.933962		0.892641	0.830178	1.10829		0.882049	0.823579	0.735485	134.54	12.81	61.3516	6.56592
A0A0A0MY25	Ribonuclease pancreatic beta-type OS=Rattus norvegicus OX=10116 GN=Rnase1 PE=3 SV=1 - [A0A0A0MY25_RAT]	2	1	1	1																																					30.41	13.16	16.9621	8.11865
F1LPS8	Transcriptional activator protein Pur-alpha OS=Rattus norvegicus OX=10116 GN=Pura PE=1 SV=3 - [F1LPS8_RAT]	2	1	2	4			1.0709	1.15395			1.0277	1.01375			1.0362	0.80994			1.08912	0.747306			0.724864	0.956634			1.19319	1.19496			1.1095	0.963764			0.918231	0.923991			1.31476	1.12677	74.38	13.15	31.884	8.5874
A0A0G2KB63	Prohibitin-2 OS=Rattus norvegicus OX=10116 GN=Phb2 PE=1 SV=1 - [A0A0G2KB63_RAT]	2	2	3	3			0.93293				1.01336				0.872277				1.01192				0.914478				0.990761				0.930944				0.993938				0.971552		67.72	13.13	33.1479	9.83252
O08589	Phospholemman OS=Rattus norvegicus OX=10116 GN=Fxyd1 PE=1 SV=2 - [PLM_RAT]	2	1	1	3	0.462207		0.919714	1.05439	1.78076		0.881538	1.15838	1.11489		1.13504	0.821709	0.496199		1.04796	1.58199	1.23946		0.856003	0.757384	1.07872		0.782215	0.912104	1.17937		1.00954	1.03064	0.899963		1.13663	0.747577	0.983247		1.08854	1.19227	46.42	13.04	10.3584	8.54346
Q9EPH1	Alpha-1B-glycoprotein OS=Rattus norvegicus OX=10116 GN=A1bg PE=2 SV=2 - [A1BG_RAT]	1	3	6	37	2.32074	1.4134			1.31677	1.7243			2.61759	0.914805			2.38582	1.30268			1.19695	1.47469			1.89719	2.20878			1.58717	1.31352			2.59133	1.25571			1.43665	1.37146			210.857	12.87	56.4425	7.28369
P70645	Bleomycin hydrolase OS=Rattus norvegicus OX=10116 GN=Blmh PE=1 SV=1 - [BLMH_RAT]	2	3	5	15		1.17233	0.93113	1.04453		1.07421	0.978008	0.89517		1.23254	0.806586	0.976965		1.20165	1.53073	0.991537		1.08411	1.08428	0.646317		1.32645	1.0485	0.78403		1.02138	0.829612	0.755506		0.92584	0.875716	0.819597		0.905172	0.979412	1.04836	74.96	11.23	52.2888	6.48096
F1M2K3	Small ubiquitin-related modifier OS=Rattus norvegicus OX=10116 GN=Sumo2 PE=3 SV=2 - [F1M2K3_RAT]	3	1	1	17	1.00482	0.651097	1.68708	0.835236	0.870271	1.03996	0.994102	1.2141	1.80776	0.647442	1.07519	1.31008	1.8391	0.705591	0.620051	0.810524	0.593465	0.97587	1.7545	1.27008	0.64236	0.944075	0.529732	1.0599	0.816692	1.11623	1.16969	1.08136	1.58283	0.797486	0.795722	1.64482	0.712302	1.37972	1.07594	0.692534	105.004	12.77	10.7633	5.50342
Q63355	Unconventional myosin-Ic OS=Rattus norvegicus OX=10116 GN=Myo1c PE=1 SV=2 - [MYO1C_RAT]	1	4	9	30	1.08309	1.14571	0.972642		0.896784	1.11616	1.12675		0.665915	1.64397	0.933683		1.02154	1.15699	1.52839		1.28985	1.32998	0.871962		1.2138	0.556128	1.49205		0.930862	0.794236	1.03319		0.827034	1.18305	1.4573		1.09381	0.968143	0.899789		163.986	10.73	119.737	9.39307
G3V9G4	ATP-citrate synthase OS=Rattus norvegicus OX=10116 GN=Acly PE=1 SV=1 - [G3V9G4_RAT]	4	6	9	16	1.0885	0.969405	0.72525	0.596279	1.00729	0.937822	3.02715	0.698021	1.43761	1.98052	1.06041	1.67326	0.650122	0.745002	1.40794	0.761956	1.11716	0.960802	0.549576	0.785892	1.17091	0.730981	1.00105	0.6617	0.870068	0.829237	0.928855	0.629279	0.234632	1.1456	0.912454	0.355579	0.671359	0.673358	0.712551	0.864843	107.97	10.17	119.637	7.44482
P14480	Fibrinogen beta chain OS=Rattus norvegicus OX=10116 GN=Fgb PE=1 SV=4 - [FIBB_RAT]	4	2	4	13	1.13953				0.315477				0.39915				0.203432				0.986551				1.26605				2.49354				0.25793				2.96469				59.91	12.73	54.2007	7.78174
Q6P7Q6	Galectin OS=Rattus norvegicus OX=10116 GN=Lgals9 PE=1 SV=1 - [Q6P7Q6_RAT]	3	1	3	21	0.374644	0.624248	0.472868		1.27913	0.520474	0.793931		1.12843	1.32267	1.80419		4.78716	0.909061	2.0444		1.28824	0.795989	1.11074		1.77726	0.70024	0.713945		2.04007	0.577376	1.57714		1.03464	0.391656	0.910478		1.37023	0.70514	1.94157		101.2	12.73	36.3172	8.54346
B2RYW7	RCG26543, isoform CRA_b OS=Rattus norvegicus OX=10116 GN=Srp14 PE=1 SV=1 - [B2RYW7_RAT]	1	1	1	2																																					31.6	12.73	12.5018	10.1694
P06685	Sodium/potassium-transporting ATPase subunit alpha-1 OS=Rattus norvegicus OX=10116 GN=Atp1a1 PE=1 SV=1 - [AT1A1_RAT]	9	6	8	25	0.960528	1.0557	0.870398	1.27567	1.07038	0.987321	1.05408	1.05158	1.07415	1.16317	1.00026	0.945312	1.28247	0.933126	1.31782	1.31858	0.937093	1.02507	0.713893	1.02832	0.966066	1.14734	1.13648	1.07364	0.981994	0.976033	0.86845	0.78904	0.999996	0.999036	1.26253	0.746195	1.10056	1.02153	1.05014	1.2992	144.253	10.36	112.982	5.45264
P30713	Glutathione S-transferase theta-2 OS=Rattus norvegicus OX=10116 GN=Gstt2 PE=1 SV=3 - [GSTT2_RAT]	3	1	3	8	0.947196	1.09366	1.04308	1.26925	1.06514	1.09354	0.889347	0.954668	0.856003	1.01045	0.89855	0.976623	0.919098	1.24482	1.17528	1.86075	0.974993	0.930447	0.70666	1.21112	0.707684	1.2468	0.975971	0.831891	0.908352	0.921505	0.834066	0.760886	0.740001	1.21928	0.841163	0.872742	0.984976	1.13447	1.02968	0.814927	36.62	8.61	27.4215	7.91357
A0A0G2K719	DEAD-box helicase 3, X-linked OS=Rattus norvegicus OX=10116 GN=Ddx3x PE=1 SV=1 - [A0A0G2K719_RAT]	4	3	5	15	1.14037	1.47651	0.931788	1.14033	1.05639	1.55402	1.39741	0.814972	0.99803	1.53302	1.59063	0.639386	2.26392	1.57085	1.45796	0.547672	1.01832	1.06789	0.86635	0.860073	0.933876	0.717023	1.47609	0.907292	1.38231		1.03558	0.989576	2.03151	0.945212	1.72079	0.453114	0.96633	1.34038	1.04391	1.1301	82	12.69	73.1001	7.18115
Q6AYT3	tRNA-splicing ligase RtcB homolog OS=Rattus norvegicus OX=10116 GN=Rtcb PE=2 SV=1 - [RTCB_RAT]	1	1	4	14	1.53819		0.970073	0.761495	0.405197		1.16038	1.15944	0.660218		0.962903	0.899558	0.985837		1.38798	0.405453	0.691711		1.25165	0.80769	0.776037		1.3329	0.907575	0.808941		1.09773	0.653999	1.01744		0.998996	0.908134	1.0164		0.807205	0.811142	37.56	9.9	55.2139	7.2251
P16290	Phosphoglycerate mutase 2 OS=Rattus norvegicus OX=10116 GN=Pgam2 PE=1 SV=2 - [PGAM2_RAT]	2	2	5	21	0.635366		1.53916	1.21041	0.528409		1.75781	1.1958	0.829817		0.954935	1.49425	0.895903		1.22164	1.33307	0.389932		0.499719	0.775082	0.539494		0.935197	0.991858	0.757625		1.65435	1.00503	0.760682		0.658218	1.01325	0.974836		1.18089	0.533724	125.623	12.65	28.7368	8.71924
P10960	Prosaposin OS=Rattus norvegicus OX=10116 GN=Psap PE=1 SV=1 - [SAP_RAT]	2	4	6	52	1.15685	0.681373	1.85396	0.917574	0.929318	0.944392	0.867138	1.31792	1.55101	0.574974	1.01427	1.50602	1.12635	0.857526	0.513302	1.15646	1.04982	0.817094	1.787	1.15711	0.883404	1.41837	0.476481	1.01938	0.967769	1.15828	1.05236	1.05101	1.19743	0.836115	0.623913	1.93881	0.739159	1.58577	0.997275	0.796004	315.477	7.22	61.0836	5.24951
P08494	Matrix Gla protein OS=Rattus norvegicus OX=10116 GN=Mgp PE=1 SV=2 - [MGP_RAT]	2	1	1	9	1.09589	0.894779	1.57558		0.817104	0.933568	0.682496		1.799	0.822143	1.02797		1.78751	0.918584	0.673862		0.622814	0.920463	2.26061		0.538165	1.0461	0.736976		0.690828	1.1789	1.25355		1.19129	0.71932	0.819239		0.786007	1.15593	1.00625		62.09	12.62	12.029	9.14404
A0A0G2JSL0	Proteasome subunit beta type OS=Rattus norvegicus OX=10116 GN=LOC100360846 PE=3 SV=1 - [A0A0G2JSL0_RAT]	2	2	3	6	1.07524		1.22279		1.06797		1.0868		0.886085		0.956401		0.758278		0.884287		0.914252		1.55491		0.780628		0.801331		0.855122		1.12195		1.21954		0.988767		1.04613		1.13177		54.9067	12.61	25.2875	4.99561
P06302	Prothymosin alpha OS=Rattus norvegicus OX=10116 GN=Ptma PE=1 SV=2 - [PTMA_RAT]	1	1	1	2			2.00065	0.77473			1.31643	1.09202			1.40808	1.34912			0.434388	0.758407			0.796098	1.49325			0.449255	1.14948			1.06172	2.17257			0.479872	3.81551			1.17219	0.740242	43.41	12.5	12.3751	3.84033
F1LQJ7	Phosphoenolpyruvate carboxykinase 2 (mitochondrial) OS=Rattus norvegicus OX=10116 GN=Pck2 PE=1 SV=2 - [F1LQJ7_RAT]	1	1	4	15			1.11308	1.04386			0.901188	0.999584			1.0119	0.735265			1.3816	0.817362			1.13976	0.784617			1.24337	1.11654			0.846056	0.900579			1.36466	1.19078			0.889505	0.927642	66.68	12.48	71.1611	8.33838
R9PXU4	Thioredoxin reductase 1, cytoplasmic OS=Rattus norvegicus OX=10116 GN=Txnrd1 PE=3 SV=2 - [R9PXU4_RAT]	2	1	2	9	1.28047	0.928454			1.04074	1.01265			1.08567	1.15066			0.827917	1.21734			1.05513	1.03035			1.05185	1.17175			1.03564	0.999118			0.958499	0.961955			1.21344	0.977531			68.8467	12.45	54.4717	6.46826
P50116	Protein S100-A9 OS=Rattus norvegicus OX=10116 GN=S100a9 PE=1 SV=3 - [S10A9_RAT]	2	1	1	2			0.704336				1.21485				0.948643				1.06013				1.64156				0.76898				1.39313				0.951963				1.00946		36.94	12.39	13.1364	7.53271
O88656	Actin-related protein 2/3 complex subunit 1B OS=Rattus norvegicus OX=10116 GN=Arpc1b PE=1 SV=3 - [ARC1B_RAT]	1	3	4	23	1.09039	1.11467	0.872285	1.05372	1.22927	0.87953	0.913815	0.86912	0.83444	1.3775	0.931941	0.903939	0.812179	1.01873	1.06554	0.641529	1.15978	1.09658	0.839951	0.884824	1.01874	0.561047	1.24234	1.07607	1.04196	0.94509	0.854253	0.879329	0.784451	1.1059	1.15768	0.872185	1.17559	0.933562	0.909532	1.1304	137.061	12.37	41.0305	8.35303
Q6AYQ4	Transmembrane protein 109 OS=Rattus norvegicus OX=10116 GN=Tmem109 PE=2 SV=1 - [TM109_RAT]	1	1	3	24	0.774671	0.948418	1.23184	0.984047	1.04918	1.14508	0.925801	0.901974	1.09167	1.0985	0.922052	1.04491	0.925373	1.13575	0.973387	0.926719	0.94831	0.943765	1.11448	0.7848	0.976918	1.0083	0.958544	0.930925	0.859293	1.02943	0.812154	0.803	0.881047	0.926304	0.966834	1.3225	0.855247	0.947029	0.914129	1.0441	86.9	12.35	26.2254	9.77393
A0A0G2JSU4	N-myc downstream regulated gene 2, isoform CRA_b OS=Rattus norvegicus OX=10116 GN=Ndrg2 PE=1 SV=1 - [A0A0G2JSU4_RAT]	3	1	2	6			1.59123	1.27125		0.718473	0.974514	0.884777		0.782422	1.16959			0.655878	1.06645	1.32576		0.738538	1.76357	1.62784		0.579717	0.976262	1.46036		0.712044	1.72674	0.951522		0.92827	0.763526	2.49762		0.549604	1.16212	1.16908	66	12.32	39.2303	5.49072
G3V978	Dehydrogenase/reductase 11 OS=Rattus norvegicus OX=10116 GN=Dhrs11 PE=1 SV=1 - [G3V978_RAT]	1	1	2	5	0.93652		0.794871	1.23658	0.694186		1.50889	0.890543	1.19365		0.955756	1.8479	0.979699		1.25117	1.48758	0.677001		1.05108	1.02655	0.91567		0.975506	0.944307	0.893257		1.26688	1.03312	1.21884		0.869582	1.31952	1.09992		1.22729	0.884128	45.48	12.31	28.3532	6.41748
P35571	Glycerol-3-phosphate dehydrogenase, mitochondrial OS=Rattus norvegicus OX=10116 GN=Gpd2 PE=1 SV=1 - [GPDM_RAT]	4	3	7	15	0.622424	1.16452	0.836069		2.00833	0.816354	1.34896		0.571979	0.954923	1.0685		3.3514	1.15897	1.50424		0.674556	0.736513	0.610651		2.49936	2.02787	1.18626		0.898197	0.836896	0.811037		0.825844	1.03978	0.806681		0.616341	0.900806	0.949665		79.99	10.45	80.9213	6.62451
F1LPC7	Hepatoma-derived growth factor OS=Rattus norvegicus OX=10116 GN=Hdgf PE=1 SV=2 - [F1LPC7_RAT]	2	1	3	5				0.683177				1.27159				1.53256				0.799296				1.01273				0.899839				0.979286				1.54066				0.721489	43.65	12.24	26.4236	4.83057
F7EMJ6	Serine (Or cysteine) peptidase inhibitor, clade A, member 5 OS=Rattus norvegicus OX=10116 GN=Serpina5 PE=3 SV=1 - [F7EMJ6_RAT]	1	1	4	5			0.502476				7.61679				0.370712				1.56506								4.84877				0.218				0.641022				0.270674		76.53	12.22	49.4144	9.34912
P16636	Protein-lysine 6-oxidase OS=Rattus norvegicus OX=10116 GN=Lox PE=1 SV=2 - [LYOX_RAT]	1	2	3	5	1.28995	1.11223			0.989292	1.0191			1.18334	1.11681			1.95561	1.43066			0.61567	0.843208			0.699008	2.43128			1.12942	0.952368			1.67212	1.02209			0.863113	1.82725			88.19	12.17	46.5293	8.32373
Q6DGG0	Peptidyl-prolyl cis-trans isomerase D OS=Rattus norvegicus OX=10116 GN=Ppid PE=1 SV=3 - [PPID_RAT]	2	2	3	10	1.36598	0.995876	0.997619	1.07599	1.08688	1.12324	1.14223	0.884632	1.30336	0.996517	1.00677	1.07217	1.13199	1.00268	1.03469	0.997221	0.957522	1.00192	0.987781	0.972159	0.966305	1.0502	0.94848	1.02246	0.965363	0.864206	1.04756	0.921176	1.00198	1.14685	0.986792	1.15708	1.28782	0.992062	0.950467	0.982164	121.2	12.16	40.7398	7.1665
B0BN63	Activator of Hsp90 ATPase activity 1 OS=Rattus norvegicus OX=10116 GN=Ahsa1 PE=1 SV=1 - [B0BN63_RAT]	1	1	2	6	1.21615				0.902502				1.02531				1.55534				0.85723				0.875293				0.978687				1.15424				1.13314				32.54	12.13	38.0802	5.52881
A0A0G2K911	NSFL1 cofactor p47 OS=Rattus norvegicus OX=10116 GN=Nsfl1c PE=1 SV=1 - [A0A0G2K911_RAT]	2	3	3	5			1.11938	1.24234			0.836725	1.17088			1.07835	0.979695			0.72871	1.22651			1.23825	1.15296			0.637127	0.979643			1.03766	1.25946			0.827591	1.16578			1.25542	1.17027	90.83	9.71	37.2269	5.51611
P35171	Cytochrome c oxidase subunit 7A2, mitochondrial OS=Rattus norvegicus OX=10116 GN=Cox7a2 PE=1 SV=1 - [CX7A2_RAT]	1	1	1	2	0.746346				1.00001				1.02925				1.16403				1.37942				1.05603				1.17197				0.894815				0.799117				37.09	12.05	9.34695	10.272
B0BNG3	Lectin, mannose-binding 2 OS=Rattus norvegicus OX=10116 GN=Lman2 PE=1 SV=1 - [B0BNG3_RAT]	1	1	3	5			1.73751	1.00084			0.872244	1.13301			1.03631	1.07579			0.843187	0.856218			1.54951	1.6551			0.928372	1.45959			1.09429	1.33205			1.03472	1.5977			0.965817	1.04089	64.8567	9.22	40.3672	6.94678
B1WC34	Protein kinase C substrate 80K-H OS=Rattus norvegicus OX=10116 GN=Prkcsh PE=1 SV=1 - [B1WC34_RAT]	1	3	8	25	0.982099	0.80595	1.639	0.917613	0.723698	0.916066	0.795461	1.40629	1.48157	0.654495	0.903794	1.13947	1.81188	0.761699	0.609641	0.776603	0.616004	0.979816	1.78362	1.42708	0.840169	0.795802	0.536912	1.29614	0.720171	1.00946	1.08778	1.17293	1.48418	0.886669	0.743847	1.60322	0.89946	1.21408	1.04393	0.815401	114.987	9.52	59.1811	4.4751
Q64542	Plasma membrane calcium-transporting ATPase 4 OS=Rattus norvegicus OX=10116 GN=Atp2b4 PE=1 SV=1 - [AT2B4_RAT]	6	5	9	27	0.980199	1.08295	0.963459	0.84683	1.44401	0.998337	0.925577	1.04561	0.663324	1.06994	0.869257	0.690021	0.745334	1.13813	1.33616	0.795458	1.39347	1.18268	0.845143	0.806872	1.40395	0.725117	1.26772	0.876858	0.781718	0.763707	0.834522	0.722211	0.706344	0.983504	1.23508	0.960975	1.34745	0.899824	0.69675	1.11977	126.495	10.31	133.01	6.56592
A0A0G2JUL7	Septin 6 (Predicted), isoform CRA_b OS=Rattus norvegicus OX=10116 GN=Sept11 PE=1 SV=1 - [A0A0G2JUL7_RAT]	11	2	4	22			0.698146	0.634706			1.14137	1.19185			0.975002	0.741132			0.957438	1.01534			0.915627	0.815448			1.12392	1.326			0.944556	1.04336			1.32819	1.39012			0.924178	1.01576	134.241	11.89	49.3102	6.81494
Q9QZR6	Septin-9 OS=Rattus norvegicus OX=10116 GN=Sept9 PE=1 SV=1 - [SEPT9_RAT]	2	5	6	18	0.744645	1.03705	1.22607	1.09619	0.90426	0.912905	1.23804	1.11978	0.750137	1.07363	1.26294	0.749548	0.817401	0.850233	1.0449	0.536101	1.29257	1.01743	0.973443	1.03688	1.36602	0.837206	1.2509	1.07458	0.553076	1.03304	0.977219	1.16121	0.858246	0.931862	1.85714	0.785144	0.838421	1.06256	0.85741	1.22206	72.4636	10.46	63.752	8.47021
F2Z3Q8	Importin subunit beta-1 OS=Rattus norvegicus OX=10116 GN=Kpnb1 PE=1 SV=1 - [F2Z3Q8_RAT]	2	3	6	22	1.95781	0.96188	0.892519	0.40189	1.49332	1.01892	0.980359	1.14247	0.719529	1.18229	0.970141	0.71057	0.995677	1.096	1.28906	3.25761	1.07995	1.14037	1.0887	0.940525	1.83606	0.691018	1.17168	1.71593	1.24078	0.914515	0.96779	0.865778	0.644763	0.977715	1.09035	2.06255	1.12464	1.10751	0.982577	0.92697	96.23	9.36	97.1221	4.77979
P18422	Proteasome subunit alpha type-3 OS=Rattus norvegicus OX=10116 GN=Psma3 PE=1 SV=3 - [PSA3_RAT]	1	1	3	9	1.38284	0.985593	0.946402	1.20032	1.14623	1.06526	1.04324	0.931942	0.956814	1.11971	1.08469	0.947982	0.821758	1.11547	1.03719	0.765154	1.21877	1.00412	0.873244	1.02929	1.33851	0.79025	1.065	1.04153	1.31459	1.04503	1.01502	1.18457	0.775874	1.08127	0.931235	1.02611	1.01327	1.135	0.986643	1.20631	48.78	8.24	28.4011	5.43994
Q6IRK8	Spectrin alpha chain, non-erythrocytic 1 OS=Rattus norvegicus OX=10116 GN=Sptan1 PE=1 SV=1 - [Q6IRK8_RAT]	5	11	21	62	0.854915	1.13785	1.12298	1.20674	1.42399	1.12832	1.00074	0.922104	1.12788	1.20042	1.28323	1.10742	1.83541	0.979166	0.931485	0.437555	1.12588	1.24874	1.05704	1.10549	3.12083	0.362953	1.29043	1.04843	1.51078	1.39557	1.31192	1.14456	1.31221	1.23056	1.15677	0.706458	0.629863	1.13898	0.824473	0.978769	319.035	9.91	282.206	5.31299
D3ZG43	NADH dehydrogenase (Ubiquinone) Fe-S protein 3 (Predicted), isoform CRA_c OS=Rattus norvegicus OX=10116 GN=Ndufs3 PE=1 SV=1 - [D3ZG43_RAT]	1	1	3	8		0.956099		0.99491		1.05102		1.24371		0.784977		1.22499		1.22782		0.895918		0.963544		1.13576		1.04582		1.07899		0.979208		0.848465		1.02745		0.976937		1.35304		1.10347	39.02	9.09	30.2076	7.53271
P02680	Fibrinogen gamma chain OS=Rattus norvegicus OX=10116 GN=Fgg PE=1 SV=3 - [FIBG_RAT]	1	2	4	16	1.33541	1.4398	1.04101	1.15927	0.44695	0.3925	1.15836	0.491195	0.575376	0.731839	0.619633	1.0614	0.500299	1.2782	1.31535	1.10833	0.955486	0.7645	0.747771	0.843966	1.11661	0.679961	1.02087	1.1958	2.17415	1.308	1.01937	1.89289	0.546502	0.755736	1.0753	0.744486	2.73643	0.828521	0.891617	1.45841	72.2222	9.21	50.6005	5.96045
D3Z9R8	6.8 kDa mitochondrial proteolipid OS=Rattus norvegicus OX=10116 GN=Mp68 PE=1 SV=1 - [68MP_RAT]	1	1	1	3	1.19578			0.985004	0.697164			1.06279	0.87582			0.944622	0.924017			0.89354	0.783098			0.787021	0.727025			0.961759	1.03247			0.77762	0.920458			1.07243	1.21988			1.11249	29.94	11.67	6.90965	9.92041
G3V6P2	Dihydrolipoamide S-succinyltransferase (E2 component of 2-oxo-glutarate complex), isoform CRA_a OS=Rattus norvegicus OX=10116 GN=Dlst PE=1 SV=1 - [G3V6P2_RAT]	2	3	4	9			0.811038	0.982505			1.06941	1.01338			0.933321	0.951393			0.95195	0.575101			0.754168	0.999549			1.18616	0.984453			1.04183	1.0708			0.981084	0.637247			0.852051	1.14504	87.3924	9.03	48.8684	8.70459
B2RZ37	Receptor expression-enhancing protein 5 OS=Rattus norvegicus OX=10116 GN=Reep5 PE=1 SV=1 - [REEP5_RAT]	1	1	3	9	0.387206	1.26976	0.965229	1.21666	1.19325	0.997162	1.1932	1.01634	1.03073	1.15447	1.22128	0.919184	0.413219	1.13369	1.04768	1.22696	1.23796	0.878303	0.811728	0.690415	1.1274	1.1377	1.51249	0.872101	1.22702	0.997968	0.93999	1.09009	0.783042	1.1843	1.25895	0.752221	1.02007	0.804877	1.37306	1.09818	51.59	11.64	21.417	8.11865
F2Z3R2	Heterogeneous nuclear ribonucleoprotein L OS=Rattus norvegicus OX=10116 GN=Hnrnpl PE=1 SV=1 - [F2Z3R2_RAT]	3	3	4	21	1.02012	1.02764	1.06673	1.0896	1.07778	1.03848	1.01507	1.00857	0.789892	1.27963	1.0077	0.637346	0.959472	0.918555	1.04653	0.391421	1.24744	1.1588	1.10296	1.02764	1.20092	0.389734	1.06081	0.926027	0.75443	0.974119	0.971853	1.18107	0.997299	1.12973	1.21924	0.59275	0.893306	1.07696	0.908806	1.19415	177.993	8.53	63.9233	8.104
F2Z3S5	RNA-binding protein, mRNA-processing factor OS=Rattus norvegicus OX=10116 GN=Rbpms PE=1 SV=3 - [F2Z3S5_RAT]	2	1	2	8			2.34566	0.74705			0.867843	1.33417			0.990207	1.05038			0.589473	0.512889			1.70327	1.28266			0.609058	1.04152			1.05757	1.11612			1.13548	1.40776			0.893522	0.921772	36.34	11.59	22.5509	8.96826
Q5M8C3	Serine (Or cysteine) proteinase inhibitor, clade A (Alpha-1 antiproteinase, antitrypsin), member 4 OS=Rattus norvegicus OX=10116 GN=Serpina4 PE=1 SV=1 - [Q5M8C3_RAT]	1	1	4	14	0.804021	0.758383	0.848437	0.58302	0.548257	0.859298	1.80798	1.23443	0.799747	0.824962	1.14543	0.970836	0.557124	0.955757	1.377	2.22767	0.836741	0.906607	0.736981	0.775558	0.990938	1.07387	1.25987	1.20584	0.942284	0.706151	1.29712	1.0969	0.735677	0.848801	1.15399	1.19957	1.43546	0.732363	1.48733	1.17424	103.79	9.93	48.0169	8.51416
M0RB65	Uncharacterized protein OS=Rattus norvegicus OX=10116 PE=1 SV=1 - [M0RB65_RAT]	3	1	2	3			0.938247	1.29728			1.22105	0.706176			1.3111	0.574313			1.47801	1.15874			0.631124	0.726802			1.80771	0.647979			1.02149	1.04934			2.01022	0.604201			1.31085	1.48989	38.95	11.58	21.9681	10.3013
B0BMT9	Sqrdl protein OS=Rattus norvegicus OX=10116 GN=Sqor PE=1 SV=1 - [B0BMT9_RAT]	1	1	5	6		0.970274		1.61087		1.04037		0.946691		1.20956		0.910438		1.18375		1.45571		0.771643		0.80877		1.34677		0.915351		0.996956		0.779074		0.791995		0.630471		0.960445		1.45075	43.42	9.33	50.1698	9.0708
D3ZVQ0	Ubiquitin carboxyl-terminal hydrolase OS=Rattus norvegicus OX=10116 GN=Usp5 PE=1 SV=1 - [D3ZVQ0_RAT]	1	2	7	24		0.910982	0.694337			1.13981	0.928823			1.12913	0.814688			1.08098	1.27547			0.948475	0.794004			0.892317	1.08082			0.860233	0.885843			1.13644	0.994837			1.03813	0.881045		123.15	9.09	95.7183	5.0083
B1WC21	Fibulin-1 OS=Rattus norvegicus OX=10116 GN=Fbln1 PE=1 SV=1 - [B1WC21_RAT]	2	6	8	34	0.98293	0.878884	1.4723	1.11427	0.628847	0.761871	0.633357	1.26432	1.31896	0.536763	0.963467	1.03184	1.65542	0.831902	0.755465	1.03484	0.607873	0.907622	1.5564	1.35398	0.779862	0.838744	0.732451	0.831728	0.669889	1.04224	1.11085	1.01255	0.835195	0.768119	0.836715	1.29609	0.899561	1.44282	1.15534	1.09758	109.673	11.53	75.3301	5.23682
Q5XIU9	Membrane-associated progesterone receptor component 2 OS=Rattus norvegicus OX=10116 GN=Pgrmc2 PE=1 SV=1 - [PGRC2_RAT]	1	2	3	5			1.06264				1.00041				0.978642				1.12424				1.08313				0.945896				0.997107				1.01056				1.0525		67.98	11.52	23.3887	5.26221
B4F7A5	CD99 molecule (Xg blood group) OS=Rattus norvegicus OX=10116 GN=Cd99 PE=1 SV=1 - [B4F7A5_RAT]	1	1	1	11	0.498594		1.62897		0.917716		0.685302		1.72725		1.04048		1.67734		0.725688		0.736165		1.53547		0.881158		0.704271		1.25882		1.04971		1.28167		0.994554		1.22546		1.11148		43.92	11.52	16.5784	5.12256
Q5XIH3	NADH dehydrogenase [ubiquinone] flavoprotein 1, mitochondrial OS=Rattus norvegicus OX=10116 GN=Ndufv1 PE=1 SV=1 - [Q5XIH3_RAT]	1	2	4	6	1.24581		1.37806		2.39378		1.3475		0.635687		1.01873		4.10008		1.43008		1.07001		0.949942		4.72811		1.53935		2.20503		1.32465		1.60221		1.26234		0.648973		1.00504		65.4	11.42	50.6986	8.07471
A0A140TAG9	Hsp90 co-chaperone Cdc37 OS=Rattus norvegicus OX=10116 GN=Cdc37 PE=1 SV=1 - [A0A140TAG9_RAT]	2	1	2	3			1.31353				1.13535				1.30693				1.11488				0.992854				1.08335				1.11055				1.20452				1.31532		46.78	11.38	44.1538	5.56689
D3ZGE6	Cortactin, isoform CRA_c OS=Rattus norvegicus OX=10116 GN=Cttn PE=1 SV=3 - [D3ZGE6_RAT]	4	3	6	16		0.981188	1.79263	0.808752		0.81893	0.997991	1.18371		0.899027	1.03017	0.892383		0.809839	0.75086	0.489853		1.01595	1.86949	1.15083		0.51867	0.731697	1.15869		1.41234	1.04261	1.19949		0.907193	0.78614	0.94453		1.26928	0.959581	0.728591	93.61	11.36	61.0403	5.31299
P05708	Hexokinase-1 OS=Rattus norvegicus OX=10116 GN=Hk1 PE=1 SV=4 - [HXK1_RAT]	2	4	7	19	0.701678	1.30175	0.828797	1.08978	1.6827	1.22946	0.905912	0.863999	0.720865	1.23919	0.959956	0.834307	0.387304	1.3356	1.19793	1.1526	1.15324	1.07216	0.850879	0.839716	1.14644	0.955259	1.17879	0.875479	1.17177	0.949184	0.841885	0.765801	0.722781	1.30613	1.29923	1.032	1.23442	0.899996	1.01037	1.38978	146.469	11.33	102.342	6.7124
Q5VLR5	BWK4 OS=Rattus norvegicus OX=10116 GN=Erp44 PE=1 SV=1 - [Q5VLR5_RAT]	1	1	4	8		1.05288	0.945235	1.38191		1.0694	0.886281	1.38562		0.931523	1.30687	1.0016		1.11802	1.02427	1.11063		0.982859	1.46706	1.00111		0.984814	0.877035	1.04165		0.97153	1.06514	1.25738		1.06841	1.11658	1.00884		0.865638	1.25721	1.41767	39.47	9.61	46.8484	5.2749
Q68FQ0	T-complex protein 1 subunit epsilon OS=Rattus norvegicus OX=10116 GN=Cct5 PE=1 SV=1 - [TCPE_RAT]	1	2	5	13			0.987009	0.960779			1.11478	1.01644			0.892462	0.777342			1.23052	0.867677			0.954179	0.85149			1.10708	1.09418			1.03652	0.838758			1.27718	0.772845			0.899507	1.0813	138.77	7.21	59.4988	5.71924
A0A0G2K890	Ezrin OS=Rattus norvegicus OX=10116 GN=Ezr PE=1 SV=1 - [A0A0G2K890_RAT]	2	1	9	68																																					123.066	8.72	69.2446	6.1001
P09606	Glutamine synthetase OS=Rattus norvegicus OX=10116 GN=Glul PE=1 SV=3 - [GLNA_RAT]	1	2	4	13	0.581985	1.04121	0.734568	0.742516	2.54171	0.989347	1.57759	0.881586	0.81667	1.32779	1.30573	1.34349	2.65633	0.995264	1.13441	1.00882	0.840315	0.883201	0.72453	1.26512	2.75882	1.28377	1.10825	0.940249	1.6991	1.17609	1.31354	0.969266	0.645383	1.42154	0.567935	0.946785	0.879754	1.05933	1.24658	0.921837	76.6667	6.97	42.2403	7.07861
F1M6Y6	Uncharacterized protein OS=Rattus norvegicus OX=10116 PE=3 SV=3 - [F1M6Y6_RAT]	12	1	3	10			0.54256	0.944647			1.15628	0.905088			0.901852	2.16564			1.2019	3.01764			0.819846	3.4658			3.66559	1.07491			0.75294	0.919986			0.852087	0.603324			0.999309	0.770162	54.8879	11.24	20.3594	6.11279
P25093	Fumarylacetoacetase OS=Rattus norvegicus OX=10116 GN=Fah PE=1 SV=1 - [FAAA_RAT]	2	1	3	10	2.32874	0.922676		1.32352	1.32291	1.09755		0.956881	1.07721	1.11538		1.32549	1.46101	0.988843		1.57677	1.93241	0.885927		1.42367	1.87552	1.11344		1.10339	1.38222	1.04241		1.02247	0.668446	1.11033		1.18165	0.70294	0.946278		0.93967	46.85	11.22	45.946	7.1665
F1LM84	Nidogen-1 OS=Rattus norvegicus OX=10116 GN=Nid1 PE=1 SV=1 - [F1LM84_RAT]	1	4	8	15	1.13001	1.31874	1.49249	0.923459	0.69329	1.44156	0.658249	1.37415	1.26146	1.24443	0.924447	1.0623	0.837325	1.26279	0.86174	0.713195	0.924955	1.65799	1.19135	1.32715	0.739014	1.06268	1.05126	0.97074	0.664151	2.16396	1.77275	1.05575	1.75257	1.69398	1.69115	1.36884	0.878548	1.49355	0.96815	0.84066	87.45	6.34	136.952	5.46533
A0A0G2JSU3	Protein SET OS=Rattus norvegicus OX=10116 GN=Set PE=1 SV=1 - [A0A0G2JSU3_RAT]	3	1	1	1																																					40.66	11.07	33.3616	4.31006
Q9JJ54	Heterogeneous nuclear ribonucleoprotein D0 OS=Rattus norvegicus OX=10116 GN=Hnrnpd PE=1 SV=2 - [HNRPD_RAT]	4	2	3	20	0.78605	0.902556	1.28449	1.04903	0.986411	0.941194	1.13707	1.18016	1.38224	0.873027	1.16763	1.12241	0.737355	0.855659	0.870022	0.677414	0.850502	0.963695	1.34474	1.17761	0.978458	0.621079	0.920499	1.10944	0.672738	1.13305	1.21821	1.2015	0.891513	0.95206	1.16248	0.942324	0.90657	1.01547	1.21093	1.0184	86.26	11.05	38.1942	7.81104
A0A0G2KAT4	Spliceosome RNA helicase Ddx39b OS=Rattus norvegicus OX=10116 GN=Ddx39b PE=1 SV=1 - [A0A0G2KAT4_RAT]	3	2	4	11	1.16622	0.73295	0.848379	1.17854	1.10006	0.97259	1.00775	0.689459	0.97805	0.861068	0.924506	1.55983	1.20466	0.892866	1.20077	1.12506	0.927314	0.835767	1.16838	0.972711	0.901976	0.931554	0.875765	0.932635	1.06303	0.900936	0.96797	1.01594	0.985784	0.738669	1.0061	1.40055	1.20986	0.951512	0.998615	1.00524	84.5211	9.27	45.6503	6.94678
O55096	Dipeptidyl peptidase 3 OS=Rattus norvegicus OX=10116 GN=Dpp3 PE=1 SV=2 - [DPP3_RAT]	1	1	5	11		0.970333				1.00788				1.09464				1.05324				0.859999				0.837877				0.951488				1.01067				0.915116			35.19	9.76	82.9869	5.22412
I6L9G5	Reticulocalbin-3 OS=Rattus norvegicus OX=10116 GN=Rcn3 PE=1 SV=1 - [RCN3_RAT]	2	4	4	21	0.851716		2.3847	0.903166	0.721494		0.942384	1.7712	1.23108		1.24102	1.32485	1.67057		0.570654	0.991975	0.498467		2.08504	1.22397	0.50948		0.482835	1.15985	0.848861		1.12653	1.13201	1.2535		0.812042	2.36629	0.755575		1.19194	0.742944	146.677	10.98	37.9182	4.86865
P81827	Urinary protein 1 OS=Rattus norvegicus OX=10116 PE=1 SV=1 - [UP1_RAT]	1	1	1	4	0.579804		1.74266	0.627128	0.570357		0.421057	0.869042	0.801361		0.774974	0.993746	1.16988		0.571307	1.43771	0.469112		1.36193	1.25973	0.509755		5.90201	1.11263	0.414688		0.781246	0.93129	0.625595		0.779991	2.3302	0.538678		0.829792	0.520714	73.82	10.89	10.9523	7.04932
Q9WU49	Calcium-regulated heat stable protein 1 OS=Rattus norvegicus OX=10116 GN=Carhsp1 PE=1 SV=1 - [CHSP1_RAT]	1	1	1	4	0.733298	0.711835	1.58982	0.911628	0.713737	0.956909	1.0333	1.14207	2.40755	0.659617	1.17042	1.92495	1.1961	0.826556	0.641824	1.07321	0.734251	0.805443	1.28042	1.09122	0.683917	1.1264	0.613227	0.856345	0.762292	1.23029	1.32008	1.24629	1.31385	0.810999	0.81803	1.61504	0.849774	1.11232	1.24448	0.731162	48.69	10.88	15.896	8.20654
D4ABI6	Ubiquitin carboxyl-terminal hydrolase OS=Rattus norvegicus OX=10116 GN=Uchl3 PE=1 SV=2 - [D4ABI6_RAT]	2	1	2	4	1.10973		1.40068		1.46858		0.911516		0.541568		0.865885		2.25659		0.963699		1.34857		1.16275		2.06224		0.828428		1.38228		1.06862		1.1854		1.04315		0.705934		1.00028		36.05	10.87	26.093	5.10986
Q63768	Adapter molecule crk OS=Rattus norvegicus OX=10116 GN=Crk PE=1 SV=1 - [CRK_RAT]	1	2	2	3				0.777192				0.934388				1.28808				0.876488				0.86587				0.814425				0.908113				0.941892				0.723632	45.14	10.86	33.824	5.5542
D4A9A3	Centromere protein V OS=Rattus norvegicus OX=10116 GN=Cenpv PE=1 SV=3 - [D4A9A3_RAT]	1	2	2	8	1.39092		0.818592	1.17516	1.40243		0.801597	1.03143	0.787695		1.11852	1.04323	0.91505		1.18771	0.366744	0.980947		0.697668	0.731114	1.52317		1.03072	0.516317	1.11287		0.680722	0.933872	0.82072		1.11711	0.947632	0.785555		1.00394	1.40695	62.4533	10.8	27.4857	9.40771
A0A0G2K8K0	Splicing factor proline and glutamine rich OS=Rattus norvegicus OX=10116 GN=Sfpq PE=1 SV=1 - [A0A0G2K8K0_RAT]	1	2	5	18	0.504808	1.10817	1.18753	0.534731	1.18061	1.12335	0.825732	0.962272	1.45709	1.29865	1.06324	0.818284	0.468702	0.963059	0.826814	2.08946	1.44429	1.14364	1.22761	1.04895	1.35249	0.406072	0.704739	1.0321	0.965652	1.43324	1.12769	1.07904	1.16533	0.974699	0.844791	1.69703	0.842786	1.57477	0.890419	0.840027	51.05	10.78	75.039	9.39307
Q7TQ70	Ac1873 OS=Rattus norvegicus OX=10116 GN=Fga PE=1 SV=1 - [Q7TQ70_RAT]	2	4	7	27	1.34487	1.16862	1.00338	1.17725	0.439623	0.477846	1.18011	0.450664	0.410387	0.651409	0.653626	1.30326	0.618688	0.943824	1.16844	1.11519	0.960327	0.700664	0.781098	0.85869	0.90155	0.794378	0.948969	1.02774	1.80844	1.14385	1.0457	1.60398	0.506219	0.648699	1.03847	0.929448	2.50762	0.77762	1.00291	1.21366	100.769	9.59	86.6029	5.74463
G3V9W6	Aldehyde dehydrogenase OS=Rattus norvegicus OX=10116 GN=Aldh3a2 PE=1 SV=1 - [G3V9W6_RAT]	3	1	3	8																																					44.66	10.74	54.0734	7.66455
D3ZUL3	Collagen type VI alpha 1 chain OS=Rattus norvegicus OX=10116 GN=Col6a1 PE=1 SV=1 - [D3ZUL3_RAT]	2	4	7	25	0.596904	1.3178	0.800587	1.27351	0.901035	1.20108	0.830154	0.827295	0.687333	2.20421	0.745395	0.735843	0.599122	1.57681	2.3075	0.61203	1.0462	0.8782	0.532939	0.733397	0.777837	0.485204	1.40232	0.900117	0.851513	0.788972	0.82352	0.65816	0.933786	0.96382	1.21054	0.613045	1.09168	0.901789	0.760629	1.46422	132.405	8.78	108.738	5.36377
P08649	Complement C4 OS=Rattus norvegicus OX=10116 GN=C4 PE=1 SV=3 - [CO4_RAT]	7	10	16	50	1.29401	1.13235	0.938631	1.58533	0.754649	0.980906	1.02023	0.629134	0.9038	0.995739	1.01277	0.990185	0.889443	1.15191	1.37747	1.31072	1.22442	1.10363	0.611506	0.849237	1.25322	1.48517	1.23827	0.79534	0.839884	1.06834	1.02654	0.639755	0.82658	1.26049	0.707576	0.704393	1.09985	0.89884	0.837093	0.959261	143.001	7.89	192.042	7.32764
D3ZL24	Calpastatin OS=Rattus norvegicus OX=10116 GN=Cast PE=1 SV=2 - [D3ZL24_RAT]	4	5	6	30	0.641145	1.08945	2.42712	0.933989	0.868213	1.05129	1.04261	1.40489	1.5636	0.817943	1.09033	1.33353	1.22969	0.962809	0.614196	0.541514	0.807569	1.14238	1.90148	1.2058	0.728958	0.676268	0.605791	1.14656	0.707894	1.40408	1.13572	1.33521	1.26495	0.877105	0.919759	1.30177	0.799546	1.33685	0.979749	0.990352	147.465	10.58	70.5144	4.99561
G3V647	Pyridoxal kinase OS=Rattus norvegicus OX=10116 GN=Pdxk PE=1 SV=1 - [G3V647_RAT]	2	1	2	2		1.11267				1.25801				1.45832				1.5752				1.08206				1.47656				1.01804				1.45534				1.36793			41.91	10.58	34.8326	6.80029
D3ZAP9	Glycerol-3-phosphate dehydrogenase [NAD(+)] OS=Rattus norvegicus OX=10116 GN=Gpd1l PE=1 SV=1 - [D3ZAP9_RAT]	1	1	4	38	0.477375		0.652223	0.56167	0.823256		2.79773	0.88319	1.70169		1.63007	1.39696	0.637094		0.802893	1.25882	1.07301		0.394418	0.830883	0.793149		0.860133	0.756638	1.23282		1.65876	1.15073	1.41126		0.602158	0.603012	1.14206		1.20782	0.733251	132.333	10.54	38.0419	7.00537
D3ZY71	RCG21156 OS=Rattus norvegicus OX=10116 GN=NEWGENE_1586233 PE=1 SV=1 - [D3ZY71_RAT]	1	1	1	3		0.858893	2.2488	0.723388		0.875647	0.902402	1.26659		0.532074	0.891732	1.39606		0.735535	0.349557	0.751145		0.822991	1.73053	1.1051		1.09217	0.45317	0.817202		1.12441	0.911756	1.03215		0.872411	0.577197	2.00941		1.61334	0.933662	0.735688	26.29	10.53	8.7501	5.47803
Q5BK80	Tetraspanin OS=Rattus norvegicus OX=10116 GN=Tspan4 PE=1 SV=1 - [Q5BK80_RAT]	1	1	1	5		0.79669				1.03164				1.04934				0.881508				0.936885				1.22398				0.991648				0.823634				0.870248			33.01	10.5	26.037	5.22412
P14669	Annexin A3 OS=Rattus norvegicus OX=10116 GN=Anxa3 PE=1 SV=4 - [ANXA3_RAT]	2	3	5	7	0.768392	0.785002		1.22486	1.03551	0.983134		0.884102	1.00333	0.898945		1.04468	0.515252	1.10969		1.79996	0.894818	0.852602		0.961003	0.688537	1.60966		1.13705	1.01803	0.880128		1.15141	0.859408	0.901634		1.10621	1.47737	1.09695		1.09442	45.76	10.19	36.3406	6.354
G3V6H9	Nucleosome assembly protein 1-like 1 OS=Rattus norvegicus OX=10116 GN=Nap1l1 PE=1 SV=1 - [G3V6H9_RAT]	2	1	4	13				0.853977				1.10621				0.873638				0.489228				1.1128				1.11791				1.08952				0.833211				0.763541	85.55	10.23	45.3449	4.4624
P08082	Clathrin light chain B OS=Rattus norvegicus OX=10116 GN=Cltb PE=1 SV=1 - [CLCB_RAT]	1	1	3	5		0.886735				0.913401				0.652436				0.761842				1.34284				0.711838				1.33667				1.02982				1.59113			40.4827	7.42	25.1021	4.62744
F1M663	Uncharacterized protein OS=Rattus norvegicus OX=10116 PE=1 SV=2 - [F1M663_RAT]	2	1	1	2	0.817309		0.654668		0.763286		0.867243		2.48434		0.602751		0.811846		1.1611		2.19929		1.27244		1.23376		0.479528		0.608196		1.0239		1.33851		0.819674		1.69768		0.611592		51.4	10.43	12.7243	5.0083
M0RCS9	Uncharacterized protein OS=Rattus norvegicus OX=10116 PE=4 SV=1 - [M0RCS9_RAT]	16	1	1	1				1.03328				0.945162				1.13427				0.660776				0.951677				1.05409				1.05094				1.07212				1.04228	34.31	10.42	16.6121	11.1362
P19945	60S acidic ribosomal protein P0 OS=Rattus norvegicus OX=10116 GN=Rplp0 PE=1 SV=2 - [RLA0_RAT]	1	1	3	12		1.15597				1.02203				1.08989				0.979559				1.00874				0.616218				0.906735				1.3112				0.833268			47.9833	7.26	34.1938	6.25244
D4ACB8	Chaperonin subunit 8 (Theta) (Predicted), isoform CRA_a OS=Rattus norvegicus OX=10116 GN=Cct8 PE=1 SV=1 - [D4ACB8_RAT]	1	3	5	16	1.31512	1.17761	1.08458	1.01263	1.01693	0.980025	1.04217	0.963596	0.826192	1.13744	1.05198	0.73333	1.75769	0.996225	1.27217	0.798411	0.968135	1.11133	1.02733	0.862222	1.02051	0.778616	1.16582	1.04659	0.964816	0.847501	0.955174	0.989573	1.41197	0.92618	1.14592	0.84592	1.08221	1.00576	0.817982	1.186	93.19	8.58	59.5505	5.5415
P61203	COP9 signalosome complex subunit 2 OS=Rattus norvegicus OX=10116 GN=Cops2 PE=1 SV=1 - [CSN2_RAT]	1	1	2	5		1.13584	2.12509	1.0918		1.02657	1.0756	1.56325		1.01613	1.40402	1.23488		1.09276	1.12537			1.31005	1.12579	0.916684		1.02821	1.18591	1.24022		0.987696	1.08366	1.09956		0.864377	1.55651	1.18927		1.53878	0.824287	0.997165	85.43	10.38	51.5641	5.52881
P52555	Endoplasmic reticulum resident protein 29 OS=Rattus norvegicus OX=10116 GN=Erp29 PE=1 SV=2 - [ERP29_RAT]	1	1	2	4			1.482				1.02859				1.1025				0.716716				1.65592				0.663661				1.03151				1.09034				1.10894		37.67	10.38	28.5569	6.62451
A0A0G2JU07	Ubiquitin-conjugating enzyme E2 variant 2 OS=Rattus norvegicus OX=10116 GN=Ube2v2 PE=1 SV=1 - [A0A0G2JU07_RAT]	2	1	2	3		0.859347				1.01404				0.832666				0.961597				0.814682				1.24965				1.04896				0.823364				1.02742			32.43	10.34	16.4463	8.07471
Q4V8H5	Aspartyl aminopeptidase OS=Rattus norvegicus OX=10116 GN=Dnpep PE=1 SV=1 - [Q4V8H5_RAT]	1	2	3	8		0.874873	0.91047	0.926619		0.814991	1.01074	0.97414		1.05309	0.887713	1.06443		1.23632	1.29476	0.658764		1.18356	0.987538	0.819132		1.01273	1.14236	0.867185		1.04206	0.849531	0.758927		1.03775	0.972678	1.41071		1.33747	0.805559	0.997968	73.6967	10.32	52.5219	7.25439
P04166	Cytochrome b5 type B OS=Rattus norvegicus OX=10116 GN=Cyb5b PE=1 SV=2 - [CYB5B_RAT]	1	1	1	1																																					34.39	10.27	16.2548	5.05908
Q2PS20	Junctophilin-2 OS=Rattus norvegicus OX=10116 GN=Jph2 PE=1 SV=1 - [JPH2_RAT]	1	2	4	12	1.34518	0.94824	3.27377	0.879938	1.16814	1.14424	1.48203	1.52144	1.12616	0.94097	1.02683	0.787055	2.9179	0.9738	1.37848	0.797022	0.988398	1.24343	2.0889	1.24228	0.907567	0.683779	1.3007	1.37787	0.838848	1.08514	1.35841	0.898089	1.47054	0.87419	1.75397	1.33658	1.05485	1.21311	2.05993	1.29811	79.92	10.26	74.2134	8.36768
D3ZAT0	RCG32168 OS=Rattus norvegicus OX=10116 GN=Svs3b PE=4 SV=1 - [D3ZAT0_RAT]	2	1	2	6			0.347961	0.201518			7.82263	0.279719			0.13207	0.478023			0.637931	0.300571			0.290007	0.185204			1.11712	8.04125			0.211852	3.82546			0.311655	1.46752			0.515139		66.46	10.23	29.8072	9.08545
D4A8Y5	Staphylococcal nuclease domain-containing protein 1 OS=Rattus norvegicus OX=10116 GN=Snd1 PE=1 SV=2 - [D4A8Y5_RAT]	2	2	6	15			0.925049	1.06794			1.09007	0.896798			1.32728	0.985131			1.33093	0.900667			0.716967	0.930951			1.59258	0.985382			0.944268	0.856804			1.6632	0.775306			1.07914	1.17466	46.0667	7.49	98.991	6.84424
Q5I0E7	Transmembrane emp24 domain-containing protein 9 OS=Rattus norvegicus OX=10116 GN=Tmed9 PE=1 SV=1 - [TMED9_RAT]	1	1	2	8	1.13187				1.01802				0.956496				0.618905				0.679242				0.832645				1.00921				0.888082				1.12685				52.0433	10.21	27.011	8.26514
P55159	Serum paraoxonase/arylesterase 1 OS=Rattus norvegicus OX=10116 GN=Pon1 PE=1 SV=3 - [PON1_RAT]	1	2	3	6	1.18517	1.33916			0.664876	1.89822			0.964016	0.979929			0.996898	1.03355			1.08596	0.929924			1.51665	1.44443			1.02531	1.50669			1.10752	1.05582			1.16283	0.608303			46.18	10.14	39.3331	5.22412
D3ZUX5	MICOS complex subunit OS=Rattus norvegicus OX=10116 GN=Chchd3 PE=1 SV=1 - [D3ZUX5_RAT]	1	1	2	3	1.28412		1.62079		1.8159		1.12709		0.5398		0.863057		2.07934		0.888003		2.03121		1.75133		1.93002		0.77531		1.60789		1.24303		1.23287		1.08493		0.763576		1.08196		38.5	10.13	26.4182	8.1333
Q64303	Serine/threonine-protein kinase PAK 2 OS=Rattus norvegicus OX=10116 GN=Pak2 PE=1 SV=1 - [PAK2_RAT]	2	3	4	10	2.00174		1.06642	1.12253	1.33573		1.1012	1.08695	0.774988		0.907974	1.03155	0.760388		0.974612	0.92274	1.29133		1.21798	0.985526	1.9977		0.831213	1.12013	1.61074		1.22369	1.11562	0.581701		1.03363	1.10991	0.815789		1.09263	1.05428	73.1667	8.02	57.9238	5.77002
P14562	Lysosome-associated membrane glycoprotein 1 OS=Rattus norvegicus OX=10116 GN=Lamp1 PE=1 SV=1 - [LAMP1_RAT]	2	1	3	8				1.11216				1.12177				0.908345				1.31328				1.23445				1.25026				1.18738				0.944512				1.04884	44.64	10.07	43.9412	8.07471
A0A140TAB4	Core histone macro-H2A OS=Rattus norvegicus OX=10116 GN=H2afy PE=1 SV=1 - [A0A140TAB4_RAT]	2	1	2	6		1.02521	0.903294			0.861866	1.06575			1.31834	1.02877			0.950513	1.28653			1.24805	1.06885			0.804994	1.39217			0.841595	0.976441			1.18967	1.46612			1.13428	0.801033		84.36	10.05	39.0461	9.81787
A0JPM9	Eukaryotic translation initiation factor 3 subunit J OS=Rattus norvegicus OX=10116 GN=Eif3j PE=1 SV=1 - [EIF3J_RAT]	1	2	2	2																																					70.18	10.04	29.1695	4.80518
D3ZD02	60S ribosomal protein L13 OS=Rattus norvegicus OX=10116 PE=3 SV=1 - [D3ZD02_RAT]	4	1	3	12	1.43406	1.53813	1.03703	1.2681	1.61562	0.955596	1.50949	0.870932	0.663425	1.33644	1	0.796942	1.17945	1.24294	1.44174	0.431676	0.978862	1.26151	0.703956	0.853309	2.78844	0.641867	1.63874	1.09278	1.20476	0.994114	0.79263	0.879709	0.930403	1.07069	1.52216	0.835776	0.730298	0.841308	0.72465	1.31323	62.03	10	24.0212	11.4731
Q6P6Q5	Amyloid-beta A4 protein OS=Rattus norvegicus OX=10116 GN=App PE=1 SV=1 - [Q6P6Q5_RAT]	2	3	5	9		0.754561				1.12552				0.885757				0.910375				1.10598				0.875258				1.09257				1.10799				0.914108			101.77	8.73	82.745	4.77979
M0RA08	Perilipin OS=Rattus norvegicus OX=10116 GN=Plin3 PE=1 SV=1 - [M0RA08_RAT]	1	1	3	5																																					31.55	5.71	47.3139	5.71924
P47824	P2X purinoceptor 1 OS=Rattus norvegicus OX=10116 GN=P2rx1 PE=2 SV=1 - [P2RX1_RAT]	2	1	2	3	1.11126				0.606635				1.02042				0.880094				0.878156				0.947835				0.713253				1.3587				0.815413				32.75	9.77	44.928	8.47021
M0R6K0	Laminin subunit beta-2 OS=Rattus norvegicus OX=10116 GN=Lamb2 PE=1 SV=1 - [M0R6K0_RAT]	3	6	12	23	1.17553	1.24608	0.937941	0.738457	0.870802	1.16677	0.805564	0.605158	0.551938	1.47226	0.57721	0.622521	0.834657	1.21478	1.00919	0.339864	1.48009	1.35529	0.486321	0.862138	1.13284	0.653823	1.22639	1.04597	0.845036	1.06579	0.627391	0.736579	1.07961	1.3754	1.41884	0.595749	1.22403	0.950084	0.462859	1.1046	173.727	8.77	196.406	6.80029
P63074	Eukaryotic translation initiation factor 4E OS=Rattus norvegicus OX=10116 GN=Eif4e PE=1 SV=1 - [IF4E_RAT]	2	2	2	4		0.918318		1.06353		1.01012		0.846281		0.950614		0.981785		1.1937		1.023		1.01504		0.956039		1.18071		1.05133		0.987687		1.00853		1.00706		0.912293		1.04456		1.0087	50.22	9.68	25.0375	6.15088
G3V8V1	Granulin, isoform CRA_c OS=Rattus norvegicus OX=10116 GN=Grn PE=4 SV=1 - [G3V8V1_RAT]	3	2	3	8			1.89078	0.815488			0.614096	1.483			0.851937	0.87032			0.727214	0.807373			1.58701	1.17902			0.563125	0.840106			1.03916	0.938664			0.578501	2.22073			0.782925	0.672333	83.3767	6.98	65.1099	6.72705
D3ZTE0	Coagulation factor XII OS=Rattus norvegicus OX=10116 GN=F12 PE=2 SV=1 - [FA12_RAT]	2	2	4	16	1.25681	1.08843	1.58632		0.543338	0.593993	0.803236		1.34517	0.646629	1.12614		1.45723	0.837621	0.834029		0.733209	1.0447	1.18983		0.968476	1.06838	0.865911		1.00934	1.19036	1.50077		0.692396	0.695843	0.831121		1.13346	0.916801	1.14996		99.79	8.4	65.8007	7.45947
O70593	Small glutamine-rich tetratricopeptide repeat-containing protein alpha OS=Rattus norvegicus OX=10116 GN=Sgta PE=1 SV=1 - [SGTA_RAT]	1	2	2	3	1.20428				0.824038				1.58926				1.67924				0.647646				0.733729				0.720645				1.49136				0.947291				35.54	5.1	34.1359	5.12256
A0A0G2K757	Dolichyl-diphosphooligosaccharide--protein glycosyltransferase subunit 2 OS=Rattus norvegicus OX=10116 GN=Rpn2 PE=1 SV=1 - [A0A0G2K757_RAT]	2	2	3	10	1.42295	1.26916	1.30885	1.16506	0.986695	0.972028	1.17664	1.3712	0.768896	1.12274	0.953059	0.733484	1.04594	0.89043	0.913006	0.990464	1.07622	1.23373	1.22495	1.04668	1.01118	0.806786	0.977105	1.03419	0.817743	0.5453	0.985644	0.903198	1.13212	1.17856	1.0463	1.96428	0.960168	1.32834	0.782713	0.988832	90.7133	7.14	69.08	5.87158
M0RA26	Ribosomal protein S27-like OS=Rattus norvegicus OX=10116 GN=LOC100362987 PE=3 SV=1 - [M0RA26_RAT]	3	1	1	3	1.95333			1.11016	1.61612			1.16896	0.863727			1.06281	0.923188			0.996334	1.48747			1.09586	1.93312			1.13728	1.49617			1.10676	0.460085			0.813316	0.941118			1.25806	30.77	9.52	9.50993	9.70068
F1LQ55	Non-specific lipid-transfer protein OS=Rattus norvegicus OX=10116 GN=Scp2 PE=1 SV=3 - [F1LQ55_RAT]	4	3	5	10		0.699649		0.777841		0.965989		1.46066		0.652121		1.27584		0.776496		0.819981		0.862191		1.28348		1.18948		1.10871		1.14116		1.11412		0.812608		1.49764		1.35196		0.67553	69.67	6.03	58.7494	7.03467
B0BNJ4	ETHE1, persulfide dioxygenase OS=Rattus norvegicus OX=10116 GN=Ethe1 PE=1 SV=1 - [B0BNJ4_RAT]	1	2	2	5	0.933582	0.798716			0.836815	1.09118			0.747449	1.10856			0.8916	0.803292			0.882213	0.682727			0.658408	1.06306			0.49826	0.895815			1.13117	0.715586			0.793102	1.45456			53.98	9.45	27.659	7.06396
D3ZJW6	RCG21066 OS=Rattus norvegicus OX=10116 GN=rCG_21066 PE=1 SV=1 - [D3ZJW6_RAT]	1	1	1	6	0.65321		0.295929	0.984389	0.741002		0.964612	0.423745	1.20431		1.10113	0.742042	0.264709		0.596726	0.568474	2.21172		0.396336	0.792989	1.57268		0.472881	0.465754	1.19902		0.774285	0.464589	0.766707		0.736682	0.284139	1.89565		0.619985	1.20822	28.9	9.4	13.0546	8.93896
Q5U2X8	Acyl-CoA thioesterase 9 OS=Rattus norvegicus OX=10116 GN=Acot9 PE=1 SV=1 - [Q5U2X8_RAT]	1	1	2	2				1.00344				0.826609				0.909031				0.779616				0.924645				0.954911				0.839554				0.758085				1.17254	32.09	9.34	50.4109	8.63135
P32089	Tricarboxylate transport protein, mitochondrial OS=Rattus norvegicus OX=10116 GN=Slc25a1 PE=1 SV=1 - [TXTP_RAT]	1	1	3	5		0.853829				0.882775				1.24749				0.970948				0.710437				1.97895				0.794797				1.12359				0.684294			48.66	6.75	33.8138	9.86182
Q5RK17	Diablo homolog (Drosophila) OS=Rattus norvegicus OX=10116 GN=Diablo PE=1 SV=1 - [Q5RK17_RAT]	1	1	1	1	1.35698				0.938804				1.04397				1.31304				1.17676				1.04898				0.784013				0.895365				1.05789				31.82	9.28	26.8896	5.73193
F1LST1	Fibronectin OS=Rattus norvegicus OX=10116 GN=Fn1 PE=1 SV=3 - [F1LST1_RAT]	3	6	16	44	0.97844	1.10843	1.07581	1.59413	0.84985	0.985692	0.613698	0.742239	0.648499	1.1751	0.813753	0.804949	0.952002	1.16426	1.2846	0.452103	0.818606	1.15869	0.747499	1.20218	1.62019	0.569388	1.3286	1.83346	1.05752	1.1184	1.08805	1.04938	1.071	1.61632	1.33807	0.866264	0.986262	0.767741	0.699695	1.07294	135.715	6.45	262.591	5.80811
Q5RJN0	NADH dehydrogenase (Ubiquinone) Fe-S protein 7 OS=Rattus norvegicus OX=10116 GN=Ndufs7 PE=1 SV=1 - [Q5RJN0_RAT]	1	1	1	1		0.964168				0.881854				1.00826				1.28302				0.821092				1.40692				0.781604				0.878422				1.16757			54.2	9.17	23.9294	9.99365
A0A0H2UHH9	40S ribosomal protein S24 OS=Rattus norvegicus OX=10116 GN=Rps24 PE=3 SV=1 - [A0A0H2UHH9_RAT]	4	1	1	2			0.861038				1.31844				0.906546				1.32976				0.699055				1.41957				0.881665				1.56606				0.904499		43.08	9.16	15.1873	10.8872
G3V6P7	Myosin, heavy polypeptide 9, non-muscle OS=Rattus norvegicus OX=10116 GN=Myh9 PE=1 SV=1 - [G3V6P7_RAT]	2	2	15	75	1.24758	1.31079	0.902085	1.31863	1.27971	1.35713	1.09586	0.857565	1.30154	1.60283	1.19281	1.15182	1.45317	1.55312	1.82043	0.718052		1.11704	0.697429	1.00679		0.821393	1.21868	0.663429	1.04343	1.20133	0.956902	0.689004	1.21175	1.05698	0.940686	0.974275	0.814246	1.0045	1.10051	0.815929	363.813	9.13	226.273	5.65576
G3V9M6	Fibrillin 1 OS=Rattus norvegicus OX=10116 GN=Fbn1 PE=1 SV=1 - [G3V9M6_RAT]	2	11	20	61	0.795362	0.892446	1.26325	2.52501	0.930754	1.82462	0.686999	0.986157	0.627299	1.20628	0.793321	0.622541	0.419917	2.21239	1.65018	0.603694	1.36421	0.903836	0.723348	0.800254	0.584235	0.606367	0.962406	0.712943	1.017	0.862051	0.686086	0.600283	0.674949	0.945579	0.798721	0.969971	0.617629	0.969001	0.55527	0.800952	322.408	6.48	311.738	4.93213
A0A0G2JVE6	Aminopeptidase OS=Rattus norvegicus OX=10116 GN=Anpep PE=1 SV=1 - [A0A0G2JVE6_RAT]	3	2	6	11			0.524263				1.1937				1.02905				1.22001				0.614417				1.20751				0.9929				1.01293				1.02268		71.76	8.19	109.366	5.46533
Q498U4	SAP domain-containing ribonucleoprotein OS=Rattus norvegicus OX=10116 GN=Sarnp PE=1 SV=3 - [SARNP_RAT]	1	1	2	2	1.31409				0.83856				1.66511				1.99138				0.829394				0.879017				1.36475				1.38387				1.04514				53.32	9.05	23.5904	6.65381
P11883	Aldehyde dehydrogenase, dimeric NADP-preferring OS=Rattus norvegicus OX=10116 GN=Aldh3a1 PE=1 SV=3 - [AL3A1_RAT]	1	1	4	4																																					58.4233	9.05	50.3067	6.80029
P08461	Dihydrolipoyllysine-residue acetyltransferase component of pyruvate dehydrogenase complex, mitochondrial OS=Rattus norvegicus OX=10116 GN=Dlat PE=1 SV=3 - [ODP2_RAT]	1	1	5	8	0.8633	1.04358	0.74874	0.85123	0.822865	0.880077	1.42872	0.883899	0.877456	1.06918	0.743867	1.27754	0.700403	0.907616	1.09879	0.551422	1.33926	0.941978	0.70561	0.987771	0.906767	1.02723	0.986939	1.01565	0.812975	0.818564	0.954893	0.921459	1.03211	1.1816	0.995944	0.563506	0.916792	0.947578	0.956747	0.846492	33.93	5.06	67.1234	8.52881
F1LRV6	GMP reductase OS=Rattus norvegicus OX=10116 GN=Gmpr PE=3 SV=1 - [F1LRV6_RAT]	2	2	2	5	0.571184	1.11019	0.720935		2.01011	0.885326	1.24763		0.570335	2.60961	0.911879		1.54589	1.34217	0.660186		0.783047	0.872261	0.675153		2.44158	2.70898	0.980813		1.12775	0.894819	0.87184		0.846108	3.14834	0.744573		0.536556	1.10351	0.76028		74.59	8.99	37.4338	6.97607
D4A6W6	Uncharacterized protein OS=Rattus norvegicus OX=10116 PE=3 SV=1 - [D4A6W6_RAT]	2	1	2	6	1.16118		1.46562		2.08114		1.29172		0.777899		1.24374		3.24308		1.38499		0.927582		0.799773		4.45358		1.78905		1.29165		0.998555		1.99718		1.75752		0.705191		0.999229		36.6	8.95	28.1393	10.7847
P17988	Sulfotransferase 1A1 OS=Rattus norvegicus OX=10116 GN=Sult1a1 PE=1 SV=1 - [ST1A1_RAT]	1	2	2	4	2.32569			1.3763	1.73886			1.15445	0.871668			1.26622	1.51311			1.67653	1.47611			1.00919	1.41206			0.759401	1.19736			0.879368	0.553085			1.12278	0.883072			1.15308	48.25	8.93	33.884	6.85889
Q8CGV7	Thiamine-triphosphatase OS=Rattus norvegicus OX=10116 GN=Thtpa PE=2 SV=3 - [THTPA_RAT]	2	1	2	3			0.763789				0.989336				1.0078				1.11357				1.56674				0.767215				0.975433				0.921905				1.39508		29.65	8.93	24.5284	4.75439
A0A096MK54	RCG24674, isoform CRA_e OS=Rattus norvegicus OX=10116 GN=Synm PE=1 SV=1 - [A0A096MK54_RAT]	2	4	9	23	1.12227	0.858816	2.98802	0.482194	0.405238	0.480425	0.987959	1.31206	0.438051	0.694105	0.627414	0.340281	4.58666	0.790337	0.451858	0.235064	0.905136	1.40431	1.78517	1.9948	0.998808	0.417853	0.686487	1.22725	0.222959	0.963952	0.786765	0.873246	2.54668	1.1376	1.44058	0.502598	0.32491	1.14223	0.519183	0.473899	88.9733	6.22	140.676	5.12256
D3ZAN3	Alpha glucosidase 2 alpha neutral subunit (Predicted) OS=Rattus norvegicus OX=10116 GN=Ganab PE=1 SV=1 - [D3ZAN3_RAT]	1	2	4	7	1.18238	0.914168	0.930623		1.34285	1.18734	0.874656		0.755158	1.49594	0.885406		0.642831	1.32244	1.29723		1.29725	1.0395	0.85927		1.63807	1.30376	1.48262		1.15858	0.971487	0.917528		0.528845	0.896694	0.919514		0.999105	1.11097	0.749399		53.34	4.89	90.5149	6.20166
B1WC84	Canopy 4 homolog (Zebrafish) OS=Rattus norvegicus OX=10116 GN=Cnpy4 PE=1 SV=1 - [B1WC84_RAT]	1	1	1	2				0.879692				1.19989				1.22067				0.455651				0.993199				0.866825				0.71236				2.64807				0.438689	55.07	8.91	28.3661	4.85596
A0A0G2K943	AP-2 complex subunit alpha OS=Rattus norvegicus OX=10116 GN=Ap2a2 PE=1 SV=1 - [A0A0G2K943_RAT]	3	1	6	14		1.17396				0.97723				1.34255				1.05709				1.2322				0.775856				1.06707				1.16172				1.08745			116.204	6.89	101.521	7.07861
B1PLB1	CD34 antigen (Predicted) OS=Rattus norvegicus OX=10116 GN=Cd34 PE=1 SV=1 - [B1PLB1_RAT]	1	1	3	9	0.784362				0.990204				1.39884				1.20433				0.961071				1.08219				0.856484				1.17948				0.886458				40.8102	8.81	41.2131	5.49072
Q923V4	F-box only protein 6 OS=Rattus norvegicus OX=10116 GN=Fbxo6 PE=1 SV=1 - [FBX6_RAT]	1	1	1	2	1.09519					1.23601			0.977633	1.64138			1.81546	1.60151			1.11203	1.57424			0.490206	0.879088			0.961376	1.04707			0.491427	1.0041			1.26489	1.38754			56.22	8.8	32.7655	6.85889
D3ZVY6	Uncharacterized protein OS=Rattus norvegicus OX=10116 PE=4 SV=3 - [D3ZVY6_RAT]	6	1	2	6			1.35853				1.17641				1.13149				1.07201				1.34302				1.17405				1.03525				1.13282				0.989413		33.06	8.73	14.624	11.2095
G3V6S0	Spectrin beta chain OS=Rattus norvegicus OX=10116 GN=Sptbn1 PE=1 SV=3 - [G3V6S0_RAT]	3	9	17	40	0.613132	1.09252	0.983254	1.10663	1.46104	0.943824	0.917685	0.856331	0.853869	1.09756	0.974215	1.03081	1.47018	0.913421	1.0195	0.456096	1.31829	1.15869	0.897317	1.01017	1.90815	0.441574	1.35869	1.05872	1.14175	1.12789	1.25672	0.939382	1.35444	1.15226	1.09378	0.788942	0.729289	1.0343	0.728104	0.951994	199.429	5.98	273.146	5.73193
Q920A6	Retinoid-inducible serine carboxypeptidase OS=Rattus norvegicus OX=10116 GN=Scpep1 PE=2 SV=1 - [RISC_RAT]	1	3	3	9	0.896097			1.04918	1.34283			1.00966	1.53961			1.22624	0.690172			1.39777	0.856142			0.995384	0.818233			0.810855	1.00025			1.17221	0.961523			1.07382	1.00838			1.08027	70.85	8.63	51.1418	5.52881
D4A772	Dystrobrevin OS=Rattus norvegicus OX=10116 GN=Dtna PE=1 SV=3 - [D4A772_RAT]	3	3	4	14	0.698204	1.75794	1.69373		0.981163	1.1285	0.947777		0.818798	0.963009	0.882003		1.59195	0.977974	1.01291		1.23895	1.32936	1.25688		1.3805	0.445877	0.860575		0.57996	1.01297	0.816066		1.43008	1.49041	0.959026		0.600404	1.1819	0.72687		57.75	6.07	70.8809	8.54346
Q99068	Alpha-2-macroglobulin receptor-associated protein OS=Rattus norvegicus OX=10116 GN=Lrpap1 PE=1 SV=2 - [AMRP_RAT]	1	2	3	7		0.924968	0.959461			1.00421	1.02049			0.875506	1.11335			0.895494	0.658448			1.06743	1.5341			0.801636	0.604999			0.938433	0.953943			0.97091	1.07624			1.05893	0.9671		51.5833	8.61	42.0061	7.37158
G3V7Z3	Nucleolar protein 3 OS=Rattus norvegicus OX=10116 GN=Nol3 PE=1 SV=1 - [G3V7Z3_RAT]	2	1	1	4	1.24265		1.58899	1.24299	0.567032			1.91043	1.16576		1.21977	1.876	1.88943		0.335071	1.58122	0.501515		1.23897	1.52919	0.90378		0.832824	1.36298	0.679368		1.36918	1.7076	1.20683			2.26251	0.908945		0.9088	1.47988	74.53	8.6	24.4763	4.06885
F1LTF8	Laminin subunit alpha 4 OS=Rattus norvegicus OX=10116 GN=Lama4 PE=1 SV=3 - [F1LTF8_RAT]	1	4	10	28	0.971748	1.22279	1.02444	0.813775	1.00094	1.23469	0.79749	0.82608	0.881505	1.50026	0.76637	0.967848	1.00106	1.08475	0.852388	0.62822	1.33778	1.23107	0.580775	0.974876	1.06236	0.831864	1.25257	0.979765	1.06278	1.15812	0.829657	0.814548	0.955845	1.27478	1.5598	0.681827	1.08167	0.970857	0.714507	1.0727	91.495	6.26	196.825	6.32861
Q5RJR2	Twinfilin-1 OS=Rattus norvegicus OX=10116 GN=Twf1 PE=1 SV=1 - [TWF1_RAT]	1	2	2	2		1.18914				1.07684				1.27056				1.08094				1.08137				0.869287				0.908822				1.07511				0.921476			49.13	8.57	40.0655	6.66846
G3V7N5	Carnitine O-palmitoyltransferase 2, mitochondrial OS=Rattus norvegicus OX=10116 GN=Cpt2 PE=1 SV=1 - [G3V7N5_RAT]	2	1	4	9		1.10023	0.547637	0.927702		0.874785	1.26057	1.12184		0.622906	0.786136	1.68288		0.995177	1.07597	1.54423		0.847909	0.526878	1.23036		2.76895	1.23399	0.931637		1.04653	0.903914	1.02289		1.15531	0.730743	1.15383		1.15967	1.01145	0.965742	43.5933	8.51	74.0314	7.45947
F1M853	Ribosome-binding protein 1 OS=Rattus norvegicus OX=10116 GN=Rrbp1 PE=1 SV=3 - [F1M853_RAT]	1	5	8	14	0.878612	0.904253	1.51514	0.943471	0.670551	0.704548	1.04673	1.19812	0.901715	0.988417	0.748466	0.98948	1.53191	0.759903	0.70348	0.308807	0.756327	0.916832	1.36941	1.63831	0.759912	0.361454	0.960088	1.48498	0.543204	1.03332	1	1.31856	1.89119	1.00196	1.13345	0.664712	0.774935	0.980374	0.90311	0.720668	78.84	6.54	157.409	9.0708
P13383	Nucleolin OS=Rattus norvegicus OX=10116 GN=Ncl PE=1 SV=3 - [NUCL_RAT]	2	2	3	15		1.25087				1.56607				1.44462				1.01688				1.25878				0.65763				0.854258				1.12094				1.12589			67.66	8.42	77.101	4.7417
P35435	ATP synthase subunit gamma, mitochondrial OS=Rattus norvegicus OX=10116 GN=Atp5f1c PE=1 SV=2 - [ATPG_RAT]	3	1	2	6			0.928416				1.08942				1.01811				0.942399				0.795283				1.23073				0.859665				1.52458				0.965935		46.69	8.42	30.1717	8.83643
P62501	TSC22 domain family protein 1 OS=Rattus norvegicus OX=10116 GN=Tsc22d1 PE=2 SV=1 - [T22D1_RAT]	2	1	1	2			2.72662	0.826522			0.861592	1.7255			1.06286	1.69451			0.434521	1.1816			1.77878	1.12677			0.477944	0.996049			1.22455	1.13586			0.70613	2.73157			1.03801	0.708751	52.89	8.39	15.5729	5.19873
Q63570	26S proteasome regulatory subunit 6B OS=Rattus norvegicus OX=10116 GN=Psmc4 PE=1 SV=1 - [PRS6B_RAT]	1	1	3	6		1				1.05505				1.04542				0.957179				1.12449				0.61644				0.895921				0.94993				1.19233			54.17	6.22	47.3786	5.21143
Q7TPB1	T-complex protein 1 subunit delta OS=Rattus norvegicus OX=10116 GN=Cct4 PE=1 SV=3 - [TCPD_RAT]	1	1	4	10		1.37436				0.959201				1.09758				0.975306				1.01025				0.828771				0.924711				1.2262				0.829729			37.87	6.86	58.0628	8.01611
A0A097BW25	Periostin OS=Rattus norvegicus OX=10116 GN=Postn PE=1 SV=1 - [A0A097BW25_RAT]	2	3	4	9				0.747255				0.671801				0.829505				0.351557				1.02222				0.990748				0.948495				0.67488				0.768192	44.96	5.36	87.0984	7.25439
A0A140TAH5	AP-2 complex subunit mu OS=Rattus norvegicus OX=10116 GN=Ap2m1 PE=1 SV=1 - [A0A140TAH5_RAT]	2	1	3	3		1.18675				1.01742				1.37267				1.03628				1.15453				0.703082				0.938553				1.41903				0.929746			48.0133	8.29	49.495	9.53955
P23711	Heme oxygenase 2 OS=Rattus norvegicus OX=10116 GN=Hmox2 PE=1 SV=1 - [HMOX2_RAT]	1	1	1	1																																					48.16	8.25	35.7397	5.49072
A0A096MJA0	RCG44919, isoform CRA_b OS=Rattus norvegicus OX=10116 GN=Tcp1 PE=1 SV=1 - [A0A096MJA0_RAT]	2	2	3	3		1.02379				0.997347				1.10967				1.07549				0.967448				0.817393				0.909499				1.11549				0.946536			62.82	8.23	43.8901	7.72314
P20761	Ig gamma-2B chain C region OS=Rattus norvegicus OX=10116 GN=Igh-1a PE=1 SV=1 - [IGG2B_RAT]	1	2	3	11	2.37448	1.02132			1.39849	1.22318			1.0655	1.78065			0.399151	1.13364			1.46871	1.10218			0.969488	0.969682			1.64036	1.46906			0.801229	1.1425			1.69095	0.797315			53.04	8.11	36.4742	7.63525
M0R8A4	Uncharacterized protein OS=Rattus norvegicus OX=10116 PE=4 SV=2 - [M0R8A4_RAT]	3	1	1	1																																					32.19	8.1	28.1199	5.31299
D4A6C9	Target of myb1-like 2 (Chicken) (Predicted), isoform CRA_a OS=Rattus norvegicus OX=10116 GN=Tom1l2 PE=1 SV=1 - [D4A6C9_RAT]	2	1	1	1																																					47.37	8.1	30.6531	4.71631
G3V6Q6	Guanine nucleotide binding protein, alpha 11 OS=Rattus norvegicus OX=10116 GN=Gna11 PE=1 SV=1 - [G3V6Q6_RAT]	3	1	3	9		0.985364				0.889868				1.43641				1.0984				1.18146				1.06995				0.885004				1.19355				1.45237			36.18	8.08	42.0175	6.29053
P15205	Microtubule-associated protein 1B OS=Rattus norvegicus OX=10116 GN=Map1b PE=1 SV=3 - [MAP1B_RAT]	4	8	14	41	1.13436	1.18322	2.19479	0.802626	0.872181	0.83338	0.916515	1.44927	0.925129	0.96522	1.09809	0.655512	1.86488	0.714733	0.740834	0.466164	1.01356	1.22995	2.47167	1.49131	1.10969	0.270551	0.606915	1.21891	0.43503	1.16441	0.841263	1.37274	1.37832	0.802804	0.702501	0.783903	0.584194	1.55241	0.663128	0.916987	184.675	6.3	269.477	4.80518
P20673	Argininosuccinate lyase OS=Rattus norvegicus OX=10116 GN=Asl PE=2 SV=1 - [ARLY_RAT]	2	1	2	5							0.524918								1.34576								0.889255				0.860252								0.76461		38.6	8.03	51.5173	6.40479
B0BNE6	NADH dehydrogenase (Ubiquinone) Fe-S protein 8 (Predicted), isoform CRA_a OS=Rattus norvegicus OX=10116 GN=Ndufs8 PE=1 SV=1 - [B0BNE6_RAT]	1	1	2	5		0.85901	1.15933			1.02396	1.11898			0.767085	0.848658			0.855406	1.07366			0.963775	1.47294			0.98374	1.00079			0.812565	1.19133			0.800679	0.766898			1.26591	0.770485		38.38	8.02	23.9547	6.21436
Q6P742	Proteolipid protein 2 OS=Rattus norvegicus OX=10116 GN=Plp2 PE=2 SV=1 - [PLP2_RAT]	1	1	1	9	0.944667	0.929508	1.21141	0.829464	0.900846	0.945314	1.07341	0.992823	1.06946	1.06826	0.907795	0.878949	1.28231	1.00469	1.03781	1.47486	0.708797	0.995861	1.18269	0.698355	0.793876	1.36124	0.925958	0.841647	1.00526	1.16311	0.813508	0.875581	0.867855	0.933737	1.05648	1.73345	1.20016	1.11044	0.745864	1.14496	75.7233	7.95	16.5457	7.1665
A0A140TAA4	Programmed cell death 6-interacting protein OS=Rattus norvegicus OX=10116 GN=Pdcd6ip PE=1 SV=1 - [A0A140TAA4_RAT]	2	4	5	10	0.847722	0.990403	1.01996	0.437807	2.04289	1.16547	1.09451	1.10099	0.571515	1.12645	0.942264	0.747794	2.57292	1.30218	1.14484	3.01441	1.24154	0.94784	1.09262	0.952931	3.02129	0.882648	1.15357	1.60574	1.1501	0.95858	0.896974	0.865854	1.48784	0.992891	1.17434	2.11587	0.770682	1.11391	1.01202	0.884804	79.5267	4.95	95.8222	6.52197
Q5PQX1	Torsin-1A-interacting protein 1 OS=Rattus norvegicus OX=10116 GN=Tor1aip1 PE=1 SV=1 - [TOIP1_RAT]	1	3	3	15	1.05407	1.1734	1.23243	1.09958	3.86281	0.754658	1.02307	1.08128	0.680669	0.636278	0.996098	0.839538	3.01012	0.876506	1.2855	0.526886	1.23711	0.818477	1.30605	0.945934	3.30821	0.719832	1.12318	0.8563	1.60126	0.71642	1.05963	0.904844	1.14696	0.714761	1.00932	0.95378	0.559732	0.876484	0.793119	1.14584	85.24	7.89	65.6089	6.41748
Q5U329	Anion exchange protein OS=Rattus norvegicus OX=10116 GN=Slc4a1 PE=1 SV=1 - [Q5U329_RAT]	3	2	4	23		0.808004	1.01279	2.00362		0.795121	2.02158	0.928916		0.883754	1.34899	2.03865		0.581711	1.74432	1.42875		0.605931	0.963529	1.03933		0.565592	1.72396	0.990434		0.381397	1.22815	0.935505		0.398434	1.68434	1.00136		0.44308	1.18147	1.02529	113.94	7.88	94.2949	6.63916
Q6AYD5	Eukaryotic peptide chain release factor GTP-binding subunit ERF3B-like OS=Rattus norvegicus OX=10116 GN=Gspt1 PE=1 SV=1 - [Q6AYD5_RAT]	1	1	2	7	1.55619	0.903385	2.27126	0.789192	1.13298	1.08853	2.38534	0.89138	0.397027	1.07446	2.21582	0.592488	1.53768	1.01848	2.67517	0.615389	0.852899	1.22567	1.79972	0.93236	0.816	0.989972	2.321	1.02476	0.827109	0.594337	2.47894	0.85863	1.13402	0.980626	2.4881	0.653868	1.31409	1.36997	2.43279	0.862381	40.87	7.86	68.7081	5.21143
Q5M890	Apolipoprotein N OS=Rattus norvegicus OX=10116 GN=Apon PE=1 SV=1 - [Q5M890_RAT]	1	1	1	1			1.1693				1.21703				1.36065				1.33973				1.41269				1.5521				1.77369				0.714089				2.36351		30.43	7.84	28.2146	5.30029
Q5BJZ3	Nicotinamide nucleotide transhydrogenase OS=Rattus norvegicus OX=10116 GN=Nnt PE=1 SV=1 - [Q5BJZ3_RAT]	1	3	6	16	0.53428	1.07582		1.11253	1.25074	1.02916		0.972166	0.642482	1.19145		0.926456	1.35922	1.09288		0.611666	1.18717	1.16315		0.937958	1.34519	0.659215		0.929198	0.775294	0.870814		0.723489	1.21699	1.13604		0.853925	0.810606	0.832805		1.1229	117.067	6.35	113.796	7.88428
A0A0G2JVP7	40S ribosomal protein S26 OS=Rattus norvegicus OX=10116 PE=3 SV=1 - [A0A0G2JVP7_RAT]	5	1	1	1				0.884152				0.976766				0.95758				0.744021				0.909357				0.991801				0.984381				0.961473				1.02043	34.6	7.83	12.5495	9.59814
P0C5H9	Mesencephalic astrocyte-derived neurotrophic factor OS=Rattus norvegicus OX=10116 GN=Manf PE=1 SV=1 - [MANF_RAT]	1	1	1	1				0.905466				1.11846				1.22849				0.848436				1.09182				1.03732				1.04415				2.05351				0.766137	52.04	7.82	20.3746	8.25049
D3ZZ21	NADH dehydrogenase (Ubiquinone) 1 beta subcomplex, 6 (Predicted) OS=Rattus norvegicus OX=10116 GN=Ndufb6 PE=1 SV=1 - [D3ZZ21_RAT]	1	1	1	4		0.855132	1.29588			0.848715	1.02673			0.802027	0.682821			0.930825	1.21767			0.99522	1.19694			1.08828	1.09205			0.919045	0.838127			0.855637	0.932552			1.41515	0.92677		31.31	7.81	15.6283	10.0376
F1LQ62	Ras-related protein Ral-B OS=Rattus norvegicus OX=10116 GN=Ralb PE=1 SV=3 - [F1LQ62_RAT]	2	1	1	2																																					38.79	7.8	23.2458	6.04932
F1LPD0	Collagen alpha-1(XV) chain-like OS=Rattus norvegicus OX=10116 GN=LOC108348074 PE=1 SV=3 - [F1LPD0_RAT]	2	7	8	64	0.846997	1.23471	1.02502	0.994016	0.854773	0.924624	0.958124	0.920258	0.623826	1.54886	0.881454	0.804427	0.548104	0.993521	1.11691	0.605817	1.22962	1.14408	0.796074	1.22856	1.22265	0.717292	1.02883	1.13383	0.995292	1.11514	0.925376	1.219	0.832465	1.5209	1.37532	0.839672	0.748547	0.901849	0.90049	1.00586	294.543	7.77	134.409	4.88135
A0A0G2K162	Erythrocyte membrane protein band 4.1-like 2 OS=Rattus norvegicus OX=10116 GN=Epb41l2 PE=1 SV=1 - [A0A0G2K162_RAT]	5	2	5	8		1.08048		1.15954		1.02791		1.04458		1.02217		1.03106		0.99368		0.654816		0.755129		0.954386		0.738933		0.980666		1.16223		1.23568		1.06513		0.768621		1.14847		1.06045	68.02	4.82	87.7534	5.71924
F1LU48	Endoplasmic reticulum-golgi intermediate compartment 1 OS=Rattus norvegicus OX=10116 GN=Ergic1 PE=1 SV=2 - [F1LU48_RAT]	1	1	1	8	1.4408	1.05488	1.19385	1.11094	1.31558	0.901238	1.11666	0.948941	0.828517	1.0886	1.12281	1.03959	1.6314	0.867791	1.16369	1.01755	1.24019	0.999937	1.14665	1.07037	2.1053	0.926707	1.32583	1.07989	1.22427	0.915104	0.962468	0.941084	1.19582	0.862825	1.18695	0.948003	1.08157	0.851755	0.983644	1.2521	104.14	7.67	34.9889	7.26904
A0A0G2KAU7	Latent-transforming growth factor beta-binding protein 2 OS=Rattus norvegicus OX=10116 GN=Ltbp2 PE=1 SV=1 - [A0A0G2KAU7_RAT]	4	7	11	30	1.99982	0.679761	2.08915	1.37221	1.66965	0.888421	0.83494	1.37384	0.963008	0.365542	1.34007	1.08839	1.08396	0.591504	0.775773	0.679525	2.41099	0.674574	1.73001	1.71827	2.04753	0.385236	0.656243	1.6448	1.86629	1.00809	1.14988	1.54892	1.05487	0.823273	0.850933	2.58201	0.813796	0.802935	1.23972	1.14322	119.326	6.23	190.018	5.32568
Q6IRK9	Carboxypeptidase Q OS=Rattus norvegicus OX=10116 GN=Cpq PE=1 SV=1 - [CBPQ_RAT]	1	2	3	4				1.28825				0.949003				1.01				1.68818				1.02548				1.06904				1.0165				0.900783				1.2088	70.43	5.51	52.0086	6.41748
G3V7L6	26S proteasome regulatory subunit 7 OS=Rattus norvegicus OX=10116 GN=Psmc2 PE=1 SV=1 - [G3V7L6_RAT]	2	2	2	7	0.817979		1.38465	0.898879	0.79841		1.14085	0.961349	0.854718		0.960713	0.822221	1.0266		1.0923	0.589907	0.914415		1.04011	1.03907	1.07416		1.16528	1.09422	0.591558		0.950586	1.06217	1.10793		1.30349	0.691341	0.772804		0.81383	1.05126	68.313	7.62	48.6031	5.94775
Q6JE36	Protein NDRG1 OS=Rattus norvegicus OX=10116 GN=Ndrg1 PE=1 SV=1 - [NDRG1_RAT]	4	2	2	7	1.87624		1.29744	1.06635	2.09614		1.05261	1.51617	0.784355		1.04224	0.965142	1.16251		1.20839	1.25462	1.13131		1.73025	0.833476	1.50707		0.965755	0.886625	1.52195		1.28994	1.12583	0.575695		0.750661	1.01769	1.09145		0.885164	1.45902	93.3	7.61	42.9269	6.18896
F1M155	Supervillin OS=Rattus norvegicus OX=10116 GN=Svil PE=1 SV=3 - [F1M155_RAT]	2	5	12	20	2.39517	1.02292	3.05151	0.611064	1.84143	0.613884	1.17033	1.23212	0.677659	0.853754	1.07498	0.731475	1.89116	0.818691	0.749139	0.412964	3.04153	1.25948	2.33202	1.69155	2.23881	0.435599	0.851375	1.43392	1.05826	1.11101	0.776326	0.957797	1.04228	0.920879	1.1928	0.758458	0.530099	0.998652	0.71569	0.771881	139.407	4.76	241.903	6.97607
D4AAT7	ATP-dependent (S)-NAD(P)H-hydrate dehydratase OS=Rattus norvegicus OX=10116 GN=Naxd PE=3 SV=1 - [NNRD_RAT]	2	1	1	1			0.855262				1.14104				0.99535				1.77289				1.86142				0.933101				1.1335				0.924116				1.08723		29.59	7.58	36.4949	7.51807
A0A0G2JXA4	Phosphoglucomutase 1 (Predicted) OS=Rattus norvegicus OX=10116 GN=Pgm2 PE=1 SV=1 - [A0A0G2JXA4_RAT]	2	1	1	3		1.41165				1.17402				1.03891				1.3817				0.769951				1.37313				1.15645				1.14787				1.11165			49.31	7.53	26.7005	7.32764
Q6P502	T-complex protein 1 subunit gamma OS=Rattus norvegicus OX=10116 GN=Cct3 PE=1 SV=1 - [TCPG_RAT]	1	1	4	10	0.694683	1.54514	0.876813		1.40491	1.03961	0.871996		0.60194	1.65043	0.96241		2.9606	1.27623	1.26435		0.910022	1.36508	0.784632		3.27057	0.785601	1.31382		1.02434	1.14832	0.791896		1.51014	1.30477	1.32892		0.715515	0.979548	1.01386		40.6767	5.5	60.6084	6.63916
D4ACC2	KN motif and ankyrin repeat domains 2 OS=Rattus norvegicus OX=10116 GN=Kank2 PE=1 SV=2 - [D4ACC2_RAT]	2	2	5	16			0.86797	0.822166			0.755175	1.15684			0.92676	0.441357			0.805134	0.42331			0.904893	1.27814			1.2265	1.19093			0.593867	0.907407			2.01022	0.579302			0.571883	0.987825	78.1597	7.5	90.1665	5.46533
P97536	Cullin-associated NEDD8-dissociated protein 1 OS=Rattus norvegicus OX=10116 GN=Cand1 PE=1 SV=1 - [CAND1_RAT]	1	2	5	13	1.65815	1.29928	1.18981	0.877415	1.26604	1.04866	1.38856	0.946486	0.837536	1.04358	1.06307	0.900807	0.675698	1.11768	1.12379	0.58309	1.11781	0.943165	0.969052	0.91659	1.44205	0.595892	1.28736	0.943952	1.10276	0.803966	0.976559	0.762163	0.557084	1.18429	1.59491	0.831921	0.593463	1.06012	1.22566	0.869998	60.44	6.91	136.275	5.78271
M0RCT5	Echinoderm microtubule-associated protein-like 1 OS=Rattus norvegicus OX=10116 GN=Eml1 PE=1 SV=2 - [M0RCT5_RAT]	3	1	4	9			0.901722				1.28215				1.11938				1.22617				0.490664				1.88391				0.692984				1.86317				0.843247		66.9433	4.23	85.6978	7.88428
A0A0G2JVQ1	Creatine kinase S-type, mitochondrial OS=Rattus norvegicus OX=10116 GN=Ckmt2 PE=1 SV=1 - [A0A0G2JVQ1_RAT]	1	1	2	5		0.728266		1.26488		0.905391		1.38805		1.43928		1.88682		0.673314		1.86497		0.543856		0.754162		1.07321		1.10599		0.67801		1.12296		0.440056		1.22235		0.922598		0.698794	74.41	7.43	47.2435	9.17334
F7FHF3	Serpin family F member 2 OS=Rattus norvegicus OX=10116 GN=Serpinf2 PE=1 SV=1 - [F7FHF3_RAT]	1	2	3	8	1.06447		0.626059	1.48862	0.823871		1.49922	0.682226	1.07968		1.11706	1.20696	0.649704		1.01454	2.50248	0.882228		0.563992	1.09347	1.04048		0.921765	0.896759	0.964131		1.19174	1.44894	0.907359		0.767338	0.616968	1.25852		1.36738	1.16075	75.0001	7.4	62.2518	6.80029
Q5I0G4	Glycine--tRNA ligase (Fragment) OS=Rattus norvegicus OX=10116 GN=Gars PE=1 SV=1 - [GARS_RAT]	2	1	3	6	1.18384		0.759232		1.07175		1.16071		1.08551		0.969745		0.662414		1.16663		1.11135		0.775757		1.01359		1.32552		1.01031		0.942796		0.855596		1.08409		1.40308		1.0013		31.55	7.38	71.9843	6.07471
Q9QX80	CArG-binding factor A OS=Rattus norvegicus OX=10116 GN=Hnrnpab PE=1 SV=1 - [Q9QX80_RAT]	2	1	2	20	1.10408	0.824455	1.21816	0.962285	1.15287	0.978375	0.945522	1.48218	1.10283	0.925028	1.09032	1.0106	1.57199	0.849503	0.884092	0.590571	1.14785	0.940449	1.57484	1.2188	1.25126	0.621789	0.771083	1.09816	1.12493	0.994552	1.05467	1.0787	0.882618	0.814031	0.802153	1.47694	0.773757	1.13632	1.03462	0.946101	128.59	7.37	30.8343	7.91357
A0A0G2K0B4	E3 ubiquitin-protein ligase OS=Rattus norvegicus OX=10116 GN=Nedd4 PE=1 SV=1 - [A0A0G2K0B4_RAT]	3	3	5	9	0.878344	1.14447	1.41606	0.919488	0.944154	0.900819	1.00246	1.18678	0.963173	1.01344	0.9661	0.91552	1.30857	1.03317	0.779187	0.714245	1.03168	1.27746	1.6363	1.43359	1.10956	0.65364	0.894798	1.2826	0.802205	1.0035	0.828682	0.98616	1.40875	1.26299	1.37658	0.954177	0.86122	1.06985	0.705617	0.929221	57.17	3.72	102.371	5.26221
F1LNH3	Collagen type VI alpha 2 chain OS=Rattus norvegicus OX=10116 GN=Col6a2 PE=1 SV=2 - [F1LNH3_RAT]	1	3	6	12	0.610528		0.93849	1.35497	0.867554		0.982041	0.748639	0.556688		1.02745	0.680425	0.371898		2.31002	0.761145	1.07035		0.607336	0.722256	0.856791		1.72445	0.902929	0.985472		0.975096	0.633368	0.897999		1.14155	0.433378	1.32819		0.784791	1.40909	112.73	5.36	109.591	6.60986
P17046	Lysosome-associated membrane glycoprotein 2 OS=Rattus norvegicus OX=10116 GN=Lamp2 PE=1 SV=3 - [LAMP2_RAT]	1	1	2	4		0.846179				1.01664				0.817546				1.05535				0.782329				1.4662				0.971226				1.02759				0.866377			33.21	7.3	45.1271	7.88428
F1LZJ4	Putative hydroxypyruvate isomerase OS=Rattus norvegicus OX=10116 GN=Hyi PE=1 SV=2 - [F1LZJ4_RAT]	1	1	1	1				0.904975				1.14315				1.1846				1.4062				1.29221				1.11734				1.0315				2.14033				1.00897	41.6	7.22	30.5705	5.64307
Q5GAM5	Angiogenin ribonuclease 2 OS=Rattus norvegicus OX=10116 GN=Ang2 PE=1 SV=1 - [Q5GAM5_RAT]	1	1	1	4	1.24907				0.511841				1.73227				1.76234				0.7615				0.574356				0.696898				0.50479				1.09488				32.94	7.19	18.5154	9.5249
A0A0G2K350	NSF attachment protein gamma OS=Rattus norvegicus OX=10116 GN=Napg PE=1 SV=1 - [A0A0G2K350_RAT]	2	2	2	7		0.926631		0.994341		1.10736		1.2815		0.869935		0.935034		0.980204		0.729181		1.16398		1.25932		0.688643		1.11916		1.19441		1.0943		1.26519		1.0925		1.36769		0.970478	45.06	7.05	34.6373	5.41455
O88350	Putative hydrolase RBBP9 OS=Rattus norvegicus OX=10116 GN=Rbbp9 PE=1 SV=2 - [RBBP9_RAT]	1	1	1	1	0.587488				0.808662				0.803544				1.36964				0.675698				0.736834				0.977363				0.8373				0.768784				28.47	6.99	20.9814	6.20166
A0A0G2K1T0	Glutaminase kidney isoform, mitochondrial OS=Rattus norvegicus OX=10116 GN=Gls PE=1 SV=1 - [A0A0G2K1T0_RAT]	3	1	3	3				1.40758				1.29747				1.00165				0.859705				0.999586				1.32697				0.875337				1.25338				1.19118	28.4	6.69	73.8181	7.86963
F7EMB2	RNA transcription, translation and transport factor OS=Rattus norvegicus OX=10116 GN=Rtraf PE=1 SV=1 - [F7EMB2_RAT]	2	1	1	1			1.35296				1.15686				1.57295				1.17977				1.89424				0.877625				1.25978				1.34967				1.32617		30.19	6.97	28.1527	6.88818
A0A0G2JZS2	Polyadenylate-binding protein 1 OS=Rattus norvegicus OX=10116 GN=Pabpc1 PE=1 SV=1 - [A0A0G2JZS2_RAT]	3	1	3	7																																					31.8867	6.92	59.9213	9.68604
P60901	Proteasome subunit alpha type-6 OS=Rattus norvegicus OX=10116 GN=Psma6 PE=1 SV=1 - [PSA6_RAT]	1	1	2	7			1.01787				1.08938				1.2498				1.23386				1.05146				1.35145				1.08949				1.32195				1.0506		29.41	6.91	27.3818	6.75635
P30349	Leukotriene A-4 hydrolase OS=Rattus norvegicus OX=10116 GN=Lta4h PE=2 SV=2 - [LKHA4_RAT]	2	1	3	14	2.33856				0.864652				1.0675				2.28025				1.03506				1.38791				0.930495				0.809106				1.00202				46.73	6.89	69.1321	6.03662
A0A0G2K845	Adiponectin, C1Q and collagen domain-containing OS=Rattus norvegicus OX=10116 GN=Adipoq PE=1 SV=1 - [A0A0G2K845_RAT]	2	1	1	6	0.652613	1.24887	0.823713	0.838784	1.68844	1.03438	1.04798	0.686557	0.623622	1.1073	0.997076	1.05444	2.47049	1.27608	1.05505	1.03521	0.829256	1.181	0.714995	0.871675	3.75647	1.26153	1.50902	0.845023	1.38416	1.23685	1.07007	0.907791	1.28725	1.40581	1.13277	0.560922	0.673432	1.0053	0.954228	1.33106	61.43	6.88	23.4516	6.72705
P21708	Mitogen-activated protein kinase 3 OS=Rattus norvegicus OX=10116 GN=Mapk3 PE=1 SV=5 - [MK03_RAT]	1	1	1	2	1.44915				0.921674				1.11685				1.3893				0.930399				0.842805				0.961617				1.22112				1.27169				38.86	6.84	43.0531	6.60986
O88321	Antisecretory factor OS=Rattus norvegicus OX=10116 GN=Psmd4 PE=1 SV=1 - [O88321_RAT]	1	1	2	6	0.845888	1.00596	1.06766		1.76024	0.98262	1.09255		0.700311	0.807675	1.11969		2.3856	0.917321	1.01879		1.84996	1.08483	1.59506		2.0019	0.804634	0.804188		1.48659	0.918086	1.14926		0.944797	0.927625	0.831418		0.553263	1.0614	0.783953		70.03	6.84	41.0474	4.80518
Q68FT1	Ubiquinone biosynthesis protein COQ9, mitochondrial OS=Rattus norvegicus OX=10116 GN=Coq9 PE=1 SV=2 - [COQ9_RAT]	1	1	1	3			1.63621				1.13912				0.642627				1.32007				0.963577				1.0561				0.987923				1.03036				1.10969		96.3	6.73	35.1235	5.77002
Q66H98	Caveolae-associated protein 2 OS=Rattus norvegicus OX=10116 GN=Cavin2 PE=1 SV=3 - [CAVN2_RAT]	1	3	3	21	1.01229	0.900779	1.25541	0.871594	0.957361	1.04102	1.082	1.43057	1.59909	0.848722	1.08027	0.920856	0.968129	0.669746	0.756076	0.401073	0.866888	1.0251	1.80178	1.4999	0.926206	0.358071	0.625334	1.05135	0.592413	1.02579	1.4698	1.39653	2.10713	0.979844	0.958298	0.656613	0.671868	1.18956	0.984165	0.78506	131.44	6.71	46.3583	5.2876
P07756	Carbamoyl-phosphate synthase [ammonia], mitochondrial OS=Rattus norvegicus OX=10116 GN=Cps1 PE=1 SV=1 - [CPSM_RAT]	1	1	7	9			0.926604				0.651692				0.677778				1.69833				0.485186				1.72499				0.437864				0.36733				0.960254		34.27	6	164.476	6.771
O35568	EGF-containing fibulin-like extracellular matrix protein 1 OS=Rattus norvegicus OX=10116 GN=Efemp1 PE=1 SV=1 - [FBLN3_RAT]	2	1	3	3																																					37.19	6.49	54.5602	5.10986
Q6AY20	Cation-dependent mannose-6-phosphate receptor OS=Rattus norvegicus OX=10116 GN=M6pr PE=1 SV=1 - [MPRD_RAT]	1	1	1	2		0.444013		0.928942		1.09403		0.854189		0.7843		0.886029		1.35029		1.13301		0.569611		1.03779		1.4365		1.13002		0.513701		0.871727		0.902164		0.619273		0.760099		1.16838	29.79	6.47	31.0754	5.38916
A0A0H2UHR7	Filamin-C OS=Rattus norvegicus OX=10116 GN=Flnc PE=1 SV=1 - [A0A0H2UHR7_RAT]	4	1	16	225	0.999154	1.75864	1.37786	0.827373	0.907302	0.893121	1.19992	0.91728	0.452896	1.41167	0.88253	0.514673	0.584266	0.948354	0.904789	0.349507	1.59891	2.07616	0.758839	1.15712	1.33526	0.433238	1.48736	1.3441	0.395954	1.13599	0.884151	0.86982	0.935948	1.8851	2.91986	0.417512	0.698232	0.957108	0.562794	1.04965	772.632	4.98	287.122	5.90967
A0A096MKG6	Heterochromatin protein 1-binding protein 3 (Fragment) OS=Rattus norvegicus OX=10116 GN=Hp1bp3 PE=1 SV=1 - [A0A096MKG6_RAT]	3	1	1	1		1.0709				0.91141				1.04565				0.888601				0.983622				0.590369				1.26654				0.957247				0.830282			24.3	6.46	32.5662	9.20264
A0A140TAG5	MICOS complex subunit MIC60 OS=Rattus norvegicus OX=10116 GN=Immt PE=1 SV=1 - [A0A140TAG5_RAT]	3	3	4	9	0.895649		0.916024	0.815939	0.868837		1.07305	0.982503	0.764992		0.765717	0.927063	0.830056		1.06139	0.609082	1.29717		0.727282	1.09855	1.06743		1.12829	0.999759	0.954149		0.885679	0.734861	0.977706		1.25356	0.619125	0.871048		0.834926	1.00051	83.18	5.26	67.0071	5.79541
Q07984	Translocon-associated protein subunit delta OS=Rattus norvegicus OX=10116 GN=Ssr4 PE=2 SV=1 - [SSRD_RAT]	1	1	1	1			0.898084				1.22852				1.06095				1.08261				0.666005				1.14328				0.804034				1.02793				0.944502		36.08	6.36	18.9675	5.78271
Q6P734	Plasma protease C1 inhibitor OS=Rattus norvegicus OX=10116 GN=Serping1 PE=2 SV=1 - [IC1_RAT]	1	2	3	10	0.686335			1.64357	0.416237			0.844888	1.42707			1.0616	0.55355			2.2637	0.688573			0.862964	0.967561			0.931171	1.27515			0.980983	0.606212			0.851084	1.50498			1.0685	42	6.35	55.5762	5.8335
P68101	Eukaryotic translation initiation factor 2 subunit 1 OS=Rattus norvegicus OX=10116 GN=Eif2s1 PE=1 SV=2 - [IF2A_RAT]	1	1	2	7	1.01728		1.07819	1.12848	1.02651		1.01466	0.97811	1.03901		1.02329	0.842624	0.867269		1.22003	0.756192	0.975683		1.00508	0.919794	0.964662		1.24346	1.16249	0.827087		0.939173	1.0115	0.978183		1.23077	0.843367	0.972115		0.905333	1.13828	77.04	6.35	36.0854	5.08447
P02454	Collagen alpha-1(I) chain OS=Rattus norvegicus OX=10116 GN=Col1a1 PE=1 SV=5 - [CO1A1_RAT]	1	4	8	87	0.329353	1.23465	1.00081	1.45999	0.781533	0.674556	0.531694	0.620939	0.486199	1.09315	0.573469	0.710267	0.321466	1.82098	4.5427	0.956058	1.39687	0.556937	0.78402	0.543028	0.752538	0.515589	1.00245	0.554017	0.554499	0.469821	0.515545	0.59544	0.655984	0.476539	0.531074	0.503442	0.77582	0.563279	0.637176	3.15196	565.005	5.71	137.869	5.92236
A0A0G2K542	UTP--glucose-1-phosphate uridylyltransferase OS=Rattus norvegicus OX=10116 GN=Ugp2 PE=1 SV=1 - [A0A0G2K542_RAT]	2	1	2	2																																					32.73	6.31	56.8507	7.32764
P02692	Fatty acid-binding protein, liver OS=Rattus norvegicus OX=10116 GN=Fabp1 PE=1 SV=1 - [FABPL_RAT]	1	1	1	3				1.72827				0.620941				0.742368				2.39731				1.20879				1.42269				0.504488				0.473306				0.506985	28.18	6.3	14.2633	8.07471
D3ZFH5	Inter-alpha-trypsin inhibitor heavy chain 2 OS=Rattus norvegicus OX=10116 GN=Itih2 PE=1 SV=3 - [D3ZFH5_RAT]	2	3	4	15	0.669985	0.788818	0.748824		1.17453	0.688243	0.854578		0.470783	1.09158	0.828034		2.55433	1.18231	1.28973		0.608286	1.04104	0.624384		2.28596	1.09451	1.09771		1.45607	1.46096	1.21251		0.829427	0.731673	0.759983		0.876407	1.12608	1.20732		67.33	6.3	92.3113	6.69775
P14272	Plasma kallikrein OS=Rattus norvegicus OX=10116 GN=Klkb1 PE=1 SV=1 - [KLKB1_RAT]	2	1	2	4		0.929088		1.17098		0.757877		0.646979		0.898663		0.95826		1.13331		1.20822		0.987461		1.31048		1.79132		0.701569		1.29813		1.01363		0.757248		1.28608		0.944714		0.808962	49.85	6.27	71.227	8.07471
D3ZPF0	Four and a half LIM domains 3 OS=Rattus norvegicus OX=10116 GN=Fhl3 PE=1 SV=1 - [D3ZPF0_RAT]	1	2	2	3	0.90735	1.33983	1.30232		0.508114	0.934197	0.932742		1.25236	1.10982	0.887666		1.62087	0.791282	0.489736		0.865959	1.35804	1.11897		0.794738	0.465053	1.1658		0.587279	1.22687	1.19576		2.29287	1.46549	1.2578		0.570243	1.1001	0.921083		38.61	3.47	31.7458	6.04932
Q9WVR7	Protein phosphatase 1F OS=Rattus norvegicus OX=10116 GN=Ppm1f PE=2 SV=1 - [PPM1F_RAT]	1	1	1	1		1.07137				1.02543				0.824402				1.52954				0.901542				1.19134				1.00412				0.741362							35.08	6.22	49.1348	5.35107
D3ZH27	Bis(5'-nucleosyl)-tetraphosphatase [asymmetrical]-like OS=Rattus norvegicus OX=10116 GN=LOC100910067 PE=4 SV=2 - [D3ZH27_RAT]	2	1	1	3	0.776772	0.926054	0.980423		1.39186	0.947897	0.863897		0.674173	0.942013	1.0779		2.46536	1.04553	1.05285		1.31543	0.836208	1.13418		2.53229	1.27356	1.01725		1.1884	0.950283	0.918729		1.25638	0.857925	1.10561		0.911039	0.921896	1.29091		42.83	6.12	16.9777	6.52197
Q5U1Z2	Trafficking protein particle complex subunit 3 OS=Rattus norvegicus OX=10116 GN=Trappc3 PE=2 SV=1 - [TPPC3_RAT]	1	1	1	3		1.02052				2.92945				1.02745				2.22456				1.11623				1.18127				1.31536				1.01552				1.35084			29.53	6.11	20.2892	4.95752
Q64268	Heparin cofactor 2 OS=Rattus norvegicus OX=10116 GN=Serpind1 PE=1 SV=1 - [HEP2_RAT]	2	1	3	7		1.18705				0.867316				1.07585				1.46939				1.0803				1.3618				1.04071				1.3028				0.737455			36.74	4.59	54.5169	6.96143
P32362	Uroporphyrinogen decarboxylase (Fragment) OS=Rattus norvegicus OX=10116 GN=Urod PE=1 SV=1 - [DCUP_RAT]	2	1	1	1			1.28267				1.17477				1.32026				1.46672				1.31111				1.14328				1.26693				1.08311				1.29887		34.26	6.04	40.4268	6.80029
A0A0G2JW88	Microtubule-associated protein OS=Rattus norvegicus OX=10116 GN=Map4 PE=1 SV=1 - [A0A0G2JW88_RAT]	2	5	9	22	1.80489	1.09657	1.80382	1.05816	1.63654	0.91235	1.07687	1.08278	0.699088	1.08992	1.24972	0.981275	0.323109	1.00172	0.89315	0.483483	0.878767	1.01332	1.41874	1	1.82406	0.508737	0.973475	1.1295	2.4998	1.16786	1.02708	1.30876	0.529113	0.874656	0.872751	1.11851	0.812531	1.20548	0.846992	1.1933	111.847	4.82	233.25	5.61768
F1LSF5	Perilipin OS=Rattus norvegicus OX=10116 GN=Plin1 PE=1 SV=3 - [F1LSF5_RAT]	3	1	2	4	0.578262	0.73464			0.511821	0.696726			2.12573	0.850107			0.707835	0.46757			0.93302	0.921779			0.446832	1.69844			0.756548	1.40735			2.21025	1.08847			0.990667	1.25609			59.1	6	55.6435	6.80029
M0R961	Far upstream element-binding protein 2 OS=Rattus norvegicus OX=10116 GN=Khsrp PE=1 SV=1 - [M0R961_RAT]	3	1	4	12																																					50.71	5.96	74.1665	6.96143
A0A0G2JYW3	Clathrin light chain OS=Rattus norvegicus OX=10116 GN=Clta PE=1 SV=1 - [A0A0G2JYW3_RAT]	3	1	2	8																																					45.3471	5.93	25.5644	4.4751
B5DEG1	Integrin subunit alpha 8 OS=Rattus norvegicus OX=10116 GN=Itga8 PE=1 SV=1 - [B5DEG1_RAT]	1	4	6	18	0.862813	1.24444	0.986809	1.04553	1.17732	1.26756	0.766881	0.915759	0.684506	1.31501	0.706157	0.760857	1.45489	1.30871	1.11347	0.964762	1.14144	1.1767	1.04042	0.878451	1.5013	1.22911	0.830752	0.784827	0.925358	0.8007	0.846242	0.894102	1.2514	1.32796	1.24003	0.693467	0.814535	0.915193	0.950649	1.0975	78.36	4.33	117.5	5.52881
A0A0G2JYW6	Uncharacterized protein OS=Rattus norvegicus OX=10116 PE=4 SV=1 - [A0A0G2JYW6_RAT]	2	1	1	3		0.627012	1.78605			1.04703	1.25849			0.590737	0.965577			0.825288	0.671199			0.850783	2.01568			1.19376	0.618248			0.870882	1.10572			0.778285	0.666272			1.1181	1.25503		40.05	5.92	18.5402	4.85596
Q63135	Complement component receptor 1-like protein OS=Rattus norvegicus OX=10116 GN=Cr1l PE=1 SV=1 - [CR1L_RAT]	2	1	2	11			1.13954				0.750239				1.03807				0.921988				1.29918				0.779902				1.10976				0.979176				1.114		30.28	5.9	61.6397	5.45264
A0JPP1	Dr1-associated corepressor OS=Rattus norvegicus OX=10116 GN=Drap1 PE=2 SV=1 - [NC2A_RAT]	1	1	1	1				1.06678				1.10431				1.0578				0.651769				1.20941				1.31269				1.11426				1.5354				0.838391	27.66	5.85	22.312	5.26221
D3ZFQ8	Cytochrome c-1 OS=Rattus norvegicus OX=10116 GN=Cyc1 PE=1 SV=3 - [D3ZFQ8_RAT]	1	1	2	13	0.908409	1.03507		0.93346	0.990384	0.868843		1.03459	1.03529	0.983754		1.3714	0.847588	1.11415		1.05846	1.20277	0.96692		0.906791	1.02578	1.85243		1.07207	1.31899	1.09502		0.872972	0.965706	0.974822		1.15016	1.08953	1.13376		0.962934	57.2033	5.83	35.412	9.26123
D3ZSC1	Sushi domain containing 5 (Predicted) OS=Rattus norvegicus OX=10116 GN=Susd5 PE=4 SV=1 - [D3ZSC1_RAT]	1	2	3	12	1.70989			1.00042	1.37323			1.01206	0.73858			1.0044	0.622867			0.729464	1.44523			1.16553	1.80198			1.13748	1.40969			1.13771	0.944784			1.91144	0.710815			0.869804	80.28	5.8	67.5129	4.83057
A0A0G2JTY6	G-rich RNA sequence-binding factor 1 OS=Rattus norvegicus OX=10116 GN=Grsf1 PE=1 SV=1 - [A0A0G2JTY6_RAT]	2	1	1	5				0.877646				1.09635				1.26643				0.932633				1.14793				1.31539				1.07819				1.1746				0.96159	72.7167	5.77	43.5216	5.2749
F1M305	ABI family member 3-binding protein OS=Rattus norvegicus OX=10116 GN=Abi3bp PE=1 SV=3 - [F1M305_RAT]	7	2	4	9	1.27472		1.33362	0.87482	1.95688		1.04064	1.42231	0.810362		1.02727	0.98201	0.991053		1.16055	0.638614	1.74776		1.48954	1.28404	2.05136		1.21724	1.27312	1.3848		1.20051	0.971951	1.18502		1.19666	1.10329	0.758611		1.12964	0.827956	61.82	4.68	94.4891	9.5542
Q566E5	KDEL motif-containing protein 2 OS=Rattus norvegicus OX=10116 GN=Kdelc2 PE=2 SV=1 - [KDEL2_RAT]	1	2	2	4		0.687726				0.850372				0.884569				1.06849				0.963565				0.924788				0.850316				0.758889				0.892038			53.57	5.71	58.6643	8.30908
Q4QQV4	Dead end homolog 1 (Zebrafish) OS=Rattus norvegicus OX=10116 GN=Hars PE=1 SV=1 - [Q4QQV4_RAT]	1	2	2	4				1.10096				0.873572				1.06398				0.900301				0.828582				1.02376				0.959269				1.07962				1.16447	77.99	5.71	57.3241	6.11279
A0A0G2K6T1	Alpha-amylase OS=Rattus norvegicus OX=10116 GN=Amy2a3 PE=3 SV=1 - [A0A0G2K6T1_RAT]	4	1	2	3				0.843795				0.882535				1.4677				1.04501				1.49151				4.61633				0.990108				1.91729				0.928663	93.0133	5.71	57.1227	7.79639
Q5U2Z3	Nucleosome assembly protein 1-like 4 OS=Rattus norvegicus OX=10116 GN=Nap1l4 PE=1 SV=1 - [NP1L4_RAT]	3	1	3	16			0.937568				0.897235				0.856696				0.698048				1.58802				0.535306				1.09348				0.841433				1.05553		71.95	5.7	43.8895	4.67822
P21913	Succinate dehydrogenase [ubiquinone] iron-sulfur subunit, mitochondrial OS=Rattus norvegicus OX=10116 GN=Sdhb PE=2 SV=2 - [SDHB_RAT]	1	2	2	22	1.62187	0.983573	1.11021		1.08693	0.978815	1.09502		1.06922	0.940573	0.723405		1.10635	0.889273	1.06728		1.11193	0.967824	1.00603		1.12814	1.54582	0.886323		1.033	0.914835	0.905996		0.907426	0.873743	0.880525		0.912485	1.23048	0.943665		66.93	5.67	31.8089	8.67529
Q6AXM8	Serum paraoxonase/arylesterase 2 OS=Rattus norvegicus OX=10116 GN=Pon2 PE=2 SV=1 - [PON2_RAT]	1	1	2	2			1.02493				1.05766				1.11413				1.31739				0.863728				1.05505				0.765095				1.01322				1.13835		41.89	5.65	39.5926	5.52881
M0R7G4	MICOS complex subunit OS=Rattus norvegicus OX=10116 GN=Apoo PE=1 SV=2 - [M0R7G4_RAT]	2	1	1	1																																					31.08	5.61	22.3555	9.12939
P41565	Isocitrate dehydrogenase [NAD] subunit gamma 1, mitochondrial OS=Rattus norvegicus OX=10116 GN=Idh3g PE=1 SV=2 - [IDHG1_RAT]	2	1	2	9		0.975139	0.576768			0.920872	1.22079			0.871172	0.865011			1.1101	1.13106			0.897661	0.603317			1.70997	1.28458			0.952002	0.940627			1.15367	0.926937			1.04236	1.04578		48.9	5.6	42.8242	8.89502
D3ZIC4	Protein phosphatase 1, regulatory (Inhibitor) subunit 12B (Predicted) OS=Rattus norvegicus OX=10116 GN=Ppp1r12b PE=1 SV=1 - [D3ZIC4_RAT]	1	4	6	19	1.01685	0.878073	2.18943	0.899558	0.882469	1.09777	0.997474	1.2388	1.49483	1.02247	0.9353	0.735634	1.60948	1.10754	0.562105	0.316689	0.894765	1.22726	1.67746	1.51883	0.975892	0.647033	0.785531	1.44016	0.709727	1.53179	1.16788	1.12735	1.36054	1.35396	1.27152	1.55621	0.857694	0.975225	0.858673	0.943375	191.235	4.63	111.321	5.61768
Q9QY17	Protein kinase C and casein kinase substrate in neurons 2 protein OS=Rattus norvegicus OX=10116 GN=Pacsin2 PE=1 SV=2 - [PACN2_RAT]	2	1	2	3			1.08615				1.04786				1.04272				1.05246				1.04485				1.22746				1.1157				1.30478				1.04734		36.87	5.53	55.9431	5.13525
D3ZDF3	MRV integration site 1 homolog (Mouse) (Predicted), isoform CRA_b OS=Rattus norvegicus OX=10116 GN=Mrvi1 PE=1 SV=1 - [D3ZDF3_RAT]	1	1	3	5		1.20052				0.876077				1.02837				0.829354				1.42196				0.325458				0.994414				1.16529				1.03526			25.96	4.33	93.509	5.78271
F1M8K0	Dystroglycan 1 OS=Rattus norvegicus OX=10116 GN=Dag1 PE=1 SV=1 - [F1M8K0_RAT]	1	3	4	19	1.13051	0.988677	1.47169	0.904487	1.31816	1.12703	0.831254	1.32604	0.771031	0.84626	1.02878	0.975303	0.777086	0.964381	0.667043	0.767534	1.24649	1.13064	1.39272	1.05437	1.42365	1.02521	0.677117	0.837552	1.16992	0.954359	1.07302	0.964055	1.21022	1.15858	0.975053	1.12932	0.648433	1.12761	0.846747	0.903251	113.33	5.49	96.6463	8.44092
D3ZB30	Polypyrimidine tract binding protein 1, isoform CRA_c OS=Rattus norvegicus OX=10116 GN=Ptbp1 PE=1 SV=1 - [D3ZB30_RAT]	7	2	2	4			0.616732				1.60692				1.51043				1.09884				0.775694				0.686686				0.926881				1.01933				1.85607		41.37	3.96	56.9004	9.17334
Q68FS8	RNA 3'-terminal phosphate cyclase OS=Rattus norvegicus OX=10116 GN=Rtca PE=1 SV=1 - [Q68FS8_RAT]	1	1	1	2																																					30.53	5.46	39.2883	7.66455
A0A0G2K478	Deoxyguanosine kinase OS=Rattus norvegicus OX=10116 GN=Dguok PE=1 SV=1 - [A0A0G2K478_RAT]	2	1	2	7		1.31385				1.28118				1.33877				1.46437				1.28208				1.54582				1.00122				1.14289				1.34756			28.1	5.42	32.1254	8.57275
D3Z8H0	Small nuclear ribonucleoprotein U1 subunit 70 OS=Rattus norvegicus OX=10116 GN=Snrnp70 PE=1 SV=1 - [D3Z8H0_RAT]	2	1	1	1		1.02237				1.25825				1.31405				1.11503				1.08044				0.337401				0.994464				1.06353				0.868343			32.52	5.42	19.7779	8.03076
Q5BK81	Prostaglandin reductase 2 OS=Rattus norvegicus OX=10116 GN=Ptgr2 PE=2 SV=2 - [PTGR2_RAT]	1	1	2	4	1.04744				0.8606				1.53449				0.9264				0.767553				0.745069				0.815368				1.17706				1.18861				31.63	5.41	38.1121	5.5415
A1L1M0	Protein kinase, cAMP-dependent, catalytic, alpha OS=Rattus norvegicus OX=10116 GN=Prkaca PE=1 SV=1 - [A1L1M0_RAT]	2	1	2	13		1.33642		1.15269		1.07276		0.964257		1.06245		1.05394		1.00582		1.55588		0.888871		0.905753		1.06779		0.86556		1.10137		1.16873		1.13754		0.801033		0.985183		1.52172	71.57	5.41	40.58	8.79248
Q68A21	Transcriptional activator protein Pur-beta OS=Rattus norvegicus OX=10116 GN=Purb PE=1 SV=3 - [PURB_RAT]	2	1	1	1				0.954171				1.14391				1.0798				1.07828				1.18953				0.973251				1.0808				0.962964				1.13531	38.4	5.4	33.3976	5.42725
D3ZLA3	Copine 3 OS=Rattus norvegicus OX=10116 GN=Cpne3 PE=1 SV=1 - [D3ZLA3_RAT]	1	1	2	3		1.03761				0.890346				1.1507				0.988707				0.954006				0.877222				1.07102				0.969964				1.02173			34.95	3	59.648	5.68115
Q5XIP9	Transmembrane protein 43 OS=Rattus norvegicus OX=10116 GN=Tmem43 PE=2 SV=1 - [TMM43_RAT]	1	1	1	2		1.04887				1.09573				1.32073				1.47589				1.25979				1.27066				0.805553				1.23522				0.828567			30.07	5.25	44.7461	7.35693
Q6AYE2	Endophilin-B1 OS=Rattus norvegicus OX=10116 GN=Sh3glb1 PE=2 SV=1 - [SHLB1_RAT]	4	1	2	3		0.980257				1.00053				0.779146				0.890335				0.863104				0.78536				1.0611				0.800241				1.08205			38.45	5.21	40.7618	6.03662
D3ZPU3	Very-long-chain 3-oxoacyl-CoA reductase OS=Rattus norvegicus OX=10116 GN=Hsd17b12 PE=1 SV=2 - [D3ZPU3_RAT]	2	1	1	1		1.13265				0.917047				1.13067				1.17628				1.01334				1.2541				1.14226				1.31977				1.00977			30.81	5.17	32.1091	9.18799
Q06645	ATP synthase F(0) complex subunit C1, mitochondrial OS=Rattus norvegicus OX=10116 GN=Atp5mc1 PE=1 SV=1 - [AT5G1_RAT]	5	1	1	4			0.434882	1.31272			0.865474	0.608189			0.943079	0.54503			0.941	0.890856			0.404075	0.686746			1.26199	0.717977			0.738165	0.962241			1.36061	0.366996			1.38105	1.50907	48.91	5.15	14.2346	9.90576
F1LPR6	Uncharacterized protein OS=Rattus norvegicus OX=10116 PE=1 SV=3 - [F1LPR6_RAT]	1	1	1	5	1.16889				0.309119				1.72879				1.30404				0.562865				0.988902				0.514753				1.2517				2.20731				31.8333	5.11	51.3673	5.60498
Q5XIM5	Protein CDV3 homolog OS=Rattus norvegicus OX=10116 GN=Cdv3 PE=1 SV=1 - [CDV3_RAT]	2	1	1	3	1.47918			0.840683	1.41662			1.02466	1.08417			1.33406	0.832119			0.89805	1.42122			1.04706	1.27929			0.752621	1.84481			1.36466	0.75788			1.33974	0.599467			0.801351	27.49	5.08	24.2957	5.85889
P54921	Alpha-soluble NSF attachment protein OS=Rattus norvegicus OX=10116 GN=Napa PE=1 SV=2 - [SNAA_RAT]	1	1	1	1																																					38.15	5.08	33.1712	5.45264
A0A0G2K7X7	Complement C7 OS=Rattus norvegicus OX=10116 GN=C7 PE=1 SV=1 - [A0A0G2K7X7_RAT]	1	2	4	12	1.20848	1.04441	1.0872	1.22174	0.598233	0.808167	1.26401	0.747322	0.996971	0.873244	1.26676	0.929704	0.672677	1.24131	1.52421	1.21278	0.844249	1.08528	0.696681	0.913899	0.705853	1.22098	1.21012	0.894869	0.930964	1.17163	1.28634	1.01228	0.691199	0.973667	0.716206	0.999772	1.8167	1.31175	0.960663	1.0254	71.24	3.66	93.6035	7.25439
A0A096MJ39	Platelet glycoprotein 4 OS=Rattus norvegicus OX=10116 GN=Cd36 PE=1 SV=1 - [A0A096MJ39_RAT]	4	1	1	7		0.868644		1.34282		0.940716		1.08653		0.882115		1.27703		0.866895		2.13875		0.880627		1.02526		1.6283		1.04412		0.870275		1.00259		1.07856				0.893901		0.684148	45.84	5.08	52.7113	8.646
Q5PPG2	Legumain OS=Rattus norvegicus OX=10116 GN=Lgmn PE=1 SV=1 - [Q5PPG2_RAT]	2	1	2	8	0.794851	1.36695	1.00324		1.48161	1.13818	0.919607		0.766183	0.944	1.22501		2.25708	1.24274	0.963908		1.19236	1.11598	1.02807		2.43421	1.36555	0.977849		1.30435	1.20232	1.00837		1.19025	1.13702	1.04742		0.871721	1.15059	1.2352		47.48	3.22	49.4484	6.58057
Q9JJ19	Na(+)/H(+) exchange regulatory cofactor NHE-RF1 OS=Rattus norvegicus OX=10116 GN=Slc9a3r1 PE=1 SV=3 - [NHRF1_RAT]	1	1	2	3		0.775403	1.973			0.92933	0.86644			0.653256	0.94916			0.814109	0.70822			0.861344	1.53673			0.942721	0.488604			1.26453	0.971073			0.887089	0.80568			1.61787	0.982451		38.12	5.06	38.8066	5.99854
Q5BJK8	Golgi integral membrane protein 4 OS=Rattus norvegicus OX=10116 GN=Golim4 PE=1 SV=2 - [GOLI4_RAT]	3	1	2	3			1.20643				1.18536				1.04459				1.01384				1.5079				0.97111				1.09862				1.02519				1.06592		28.57	5.05	76.5506	4.85596
P27867	Sorbitol dehydrogenase OS=Rattus norvegicus OX=10116 GN=Sord PE=1 SV=4 - [DHSO_RAT]	1	1	1	4		1.05385	0.741457	1.64143		1.10839	0.857222	0.859666		0.996874	1.05402	1.34035		1.00898	1.01612	1.68101		0.853226	0.779704	1.28994		1.02605	0.863219	1.03522		1.04487	0.978447	1.04432		0.842776	0.674389	1.27079		0.991247	1.15614	1.13885	53.11	5.04	38.2098	7.44482
F1M227	Uncharacterized protein OS=Rattus norvegicus OX=10116 PE=4 SV=2 - [F1M227_RAT]	2	1	1	1			0.876071				0.953076				0.997853				1.06478				0.977787				1.05012				1.00087				1.01175				1.11606		28.42	5.04	15.4459	7.1958
A0A0G2K3C5	Cystathionine gamma-lyase OS=Rattus norvegicus OX=10116 GN=Cth PE=1 SV=1 - [A0A0G2K3C5_RAT]	3	1	1	2				1.19322				0.766118				0.975503				2.50287				2.43005				1.70933				0.498295				0.663352				0.916397	44.94	5.03	43.5622	7.79639
D3ZF12	Signal peptidase complex subunit 3 OS=Rattus norvegicus OX=10116 GN=Spcs3 PE=1 SV=1 - [D3ZF12_RAT]	1	1	1	3																																					39.1	5	20.3146	8.6167
Q6PEC4	S-phase kinase-associated protein 1 OS=Rattus norvegicus OX=10116 GN=Skp1 PE=1 SV=3 - [SKP1_RAT]	2	1	1	6				0.968327				1.2778				0.965967				0.921709				1.21711				1.11056				1.13236				1.36619				1.00746	40.34	4.91	18.6603	4.53857
F1M9V7	Aminopeptidase OS=Rattus norvegicus OX=10116 GN=Npepps PE=1 SV=1 - [F1M9V7_RAT]	1	1	3	3			0.753542				1.09886				1.02143				1.29069				0.675595				1.27232				0.814846				1.04589				0.931745		35.86	2.93	103.279	5.77002
A0A096MJA9	Aspartate-beta-hydroxylase OS=Rattus norvegicus OX=10116 GN=Asph PE=1 SV=1 - [A0A096MJA9_RAT]	3	2	2	11	0.919145	0.725853	0.869634	0.5131	1.01118	1.08558	1.13522	0.705904	0.711999	1.43345	0.862679	0.742161	1.02112	0.841466	1.50304	1.65823	1.05606	1.57996	0.873485	0.840743	1.09178	1.40082	1.11759	1.11653	0.663331	1.03161	0.704564	0.725732	1.1473	1.08297	1.44102	1.4223	0.820844	0.74659	0.722137	0.788084	99.34	4.87	74.8441	4.90674
D4AE17	Mitogen-activated protein kinase kinase kinase 20 OS=Rattus norvegicus OX=10116 GN=Map3k20 PE=1 SV=1 - [D4AE17_RAT]	1	1	1	5				1.01095				0.617917				0.702872				0.557784				0.893724				1.1562				0.857361				0.562138				1.25325	38.0967	4.86	51.2841	5.30029
D4A1R8	Copine-1 OS=Rattus norvegicus OX=10116 GN=Cpne1 PE=1 SV=1 - [CPNE1_RAT]	1	1	2	2			0.937753				1.07276				1.13425				1.27388				0.991779				1.29692				1.02367				1.15878				1.10176		32.35	4.85	58.8064	5.64307
Q5FVM4	Non-POU domain-containing octamer-binding protein OS=Rattus norvegicus OX=10116 GN=Nono PE=1 SV=3 - [NONO_RAT]	1	1	1	3																																					63.23	4.83	54.8906	8.95361
B4F7E8	Niban-like protein 1 OS=Rattus norvegicus OX=10116 GN=Fam129b PE=1 SV=1 - [NIBL1_RAT]	1	1	2	3		1.36198		1.15206		0.935232		0.810026		0.952541		1.02748		1.18397		0.993832		0.836448		0.805947		0.788195		0.924361		1.06342		1.08965		1.22518		1.23623		0.777957		1.45044	35.67	4.82	84.6771	5.94775
F1M6Q3	Collagen type IV alpha 2 chain OS=Rattus norvegicus OX=10116 GN=Col4a2 PE=1 SV=3 - [F1M6Q3_RAT]	1	3	5	23	0.921818	1.1173		0.981725	0.450905	0.99899		0.66749	1.17918	0.93015		0.89896	2.13042	1.14065		0.504146	1.0068	1.02506		1.17802	0.718519	1.02641		1.07382	2.83125	1.12964		0.865571	1.78417	1.03718		0.917838	0.622823	1.012		0.863732	73.97	4.8	160.657	8.08936
Q4FZU4	ADAMTS-like protein 4 OS=Rattus norvegicus OX=10116 GN=Adamtsl4 PE=2 SV=1 - [ATL4_RAT]	1	2	4	12	1.67795		1.88076	1.11732	1.973		0.914578	1.86135	0.87581		1.10989	1.29526	1.4746		1.03315	0.87823	2.75201		3.12234	1.26456	1.27901		0.490643	0.800399	1.16763		0.683361	1.14093	1.55957		0.865812	2.89523	0.79633		1.01942	0.971787	120.887	3.88	112.712	8.08936
G3V7N9	Complement C1q subcomponent subunit B OS=Rattus norvegicus OX=10116 GN=C1qb PE=1 SV=1 - [G3V7N9_RAT]	2	1	1	6	1.6116	1.83408	1.10003	1.23059	0.291314	0.310219	0.46843	0.352148	0.924841	0.734395	0.781408	0.325925	0.60696	0.719088	0.996896	0.897011	0.805637	1.21805	0.331656	0.978949	1.28201	0.458373	1.18641	0.925896	0.944579	0.937339	1.15793	0.901577	0.546476	0.92856	0.585571	0.616105	3.15847	0.755212	0.78827	1.01262	61.51	4.74	26.6308	8.82178
B1WC26	N-acetylneuraminate synthase OS=Rattus norvegicus OX=10116 GN=Nans PE=1 SV=1 - [B1WC26_RAT]	1	1	1	1																																					25.22	4.74	40.0254	6.84424
D3ZUY8	AP-2 complex subunit alpha OS=Rattus norvegicus OX=10116 GN=Ap2a1 PE=1 SV=1 - [D3ZUY8_RAT]	1	1	4	9																																					84.58	4.71	107.607	7.06396
F1M8B7	Charged multivesicular body protein 2B OS=Rattus norvegicus OX=10116 GN=Chmp2b PE=1 SV=2 - [F1M8B7_RAT]	1	1	1	1				0.898158				1.008				1.0314				0.747372				1.19333				0.968888				1.01622				1.16597				0.902977	28.38	4.69	23.9192	8.77783
G3V8L1	PYD and CARD domain-containing OS=Rattus norvegicus OX=10116 GN=Pycard PE=1 SV=1 - [G3V8L1_RAT]	1	1	1	4	1.84829			1.05046	1.3243			0.957882	0.860152			1.05841	1.50158			1.62055	1.7531			1.29156	1.00393			0.590624	1.40917			1.0424	0.996243			1.76111	0.632123			0.845004	29.64	4.66	21.6591	5.2749
A0A0G2K7K2	Apoptosis-inducing factor 1, mitochondrial OS=Rattus norvegicus OX=10116 GN=Aifm1 PE=1 SV=1 - [A0A0G2K7K2_RAT]	2	1	2	11	1.09565	0.845244		1.06405	1.0909	0.810975		0.74451	0.72115	0.874579		0.934234	0.705632	1.12511		1.18736	1.42195	0.867537		0.771552	1.27233	1.70382		0.847633	1.16444	0.522426		0.780134	0.662641	0.986186		0.628719	1.12247	0.671923		1.15565	95.69	4.61	66.0925	8.89502
G3V8G5	Golgi apparatus protein 1 OS=Rattus norvegicus OX=10116 GN=Glg1 PE=1 SV=1 - [G3V8G5_RAT]	2	3	5	13	0.889586	1.07124	0.933819	1.2108	0.968917	1.24243	1.01962	1.12087	0.977705	1.14723	0.950364	0.862683	0.850824	1.08841	1.28052	0.787472	0.940233	1.02343	1.25341	1.20035	0.929698	0.951925	1.02581	1.15659	0.818518	0.889375	1.03303	1.20601	0.981646	1.0937	1.16547	0.958524	0.981359	0.880132	1.11022	1.43627	72	3.76	133.465	6.90283
P09034	Argininosuccinate synthase OS=Rattus norvegicus OX=10116 GN=Ass1 PE=1 SV=1 - [ASSY_RAT]	1	1	1	1		0.802214				1.33335				1.38491				0.905769				0.959366				0.791153				0.878842				0.802426				0.987975			35.74	4.61	46.4669	7.78174
P97531	Cdc42-interacting protein 4 OS=Rattus norvegicus OX=10116 GN=Trip10 PE=1 SV=3 - [CIP4_RAT]	1	1	2	3	0.624887		0.788718		1.47239		0.913881		0.610688		0.976397		2.87989		1.22989		0.957368		0.825455		2.34762		0.943068		1.07989		0.834841		0.958932		0.843857		0.535873		0.759312		22.32	4.57	62.7602	5.41455
Q66HA8	Heat shock protein 105 kDa OS=Rattus norvegicus OX=10116 GN=Hsph1 PE=1 SV=1 - [HS105_RAT]	4	3	4	13	1.13633	1.05237	1.71708	0.907289	1.34099	1.08744	1.04904	0.81787	0.687364	1.32951	0.89872	0.88645	1.91747	1.30663	1.02456	0.783745	1.27386	1.20499	1.07135	1.10889	1.93123	0.967069	1.37114	1.09169	1.02614	0.792845	0.95139	0.877006	1.15568	1.24773	1.18258	0.939976	0.838494	1.0233	0.868859	1.25171	71.38	3.73	96.3574	5.5542
P31211	Corticosteroid-binding globulin OS=Rattus norvegicus OX=10116 GN=Serpina6 PE=1 SV=2 - [CBG_RAT]	1	1	2	2		1.02927				1.34763				1.14099				1.16404				1.07835				1.96742				1.73718				1.26737				1.18717			31.82	4.55	44.6423	4.98291
B5DEZ8	Plexin domain containing 2 (Predicted) OS=Rattus norvegicus OX=10116 GN=Plxdc2 PE=1 SV=1 - [B5DEZ8_RAT]	2	2	3	8	0.931572	0.960311	1.07243		1.05498	0.964062	0.857395		0.970511	1.12223	1.02434		1.00289	1.04042	0.889841		1.00818	1.04111	1.14729		0.877914	1.02088	0.778084		1.20087	0.945931	0.888568		1.25439	1.20554	1.05653		0.967984	0.917647	1.06879		48.4332	4.53	59.3793	6.62451
Q66H86	Olfactomedin-like protein 1 OS=Rattus norvegicus OX=10116 GN=Olfml1 PE=2 SV=1 - [OLFL1_RAT]	1	2	2	3	0.771944		0.996637		1.1507		0.87457		0.540893		0.952859		4.87267		1.76025		1.09791		0.968961		3.19713		1.20941		1.49811		1.08204		1.22367		1.11431		1.24343		1.53782		49.09	4.48	45.5711	7.54736
A0A0G2JT93	Catenin (Cadherin associated protein), beta 1, isoform CRA_a OS=Rattus norvegicus OX=10116 GN=Ctnnb1 PE=1 SV=1 - [A0A0G2JT93_RAT]	2	1	1	4						0.877414	1.03915			0.780395	1.26555			0.832502	1.31508			0.683319	1.3015			0.449961	1.10088				0.807899			0.983517	0.862252			1.4771	0.947326		70.77	4.48	85.4162	5.85889
A0A140TAI3	Heterogeneous nuclear ribonucleoprotein C, isoform CRA_b OS=Rattus norvegicus OX=10116 GN=Hnrnpc PE=1 SV=1 - [A0A140TAI3_RAT]	4	1	2	6	0.719341	0.946686	0.607376	1.11612	1.07314	1.08262	0.995731	1.18217	1.18228	1.08862	1.0636	0.939166	0.294456	0.907988	1.06579	0.533559	1.06355	1.18242	1.06795	1.05928	1.07992	0.49226	0.980434	0.824783	0.61515	1.01727	1.0978	1.21384	1.19042	1.10424	1.30561	0.54069	0.842133	0.809932	0.995863	1.03192	85.57	4.44	32.3029	5.08447
A0A0G2JVW1	Insulin-like growth factor-binding protein 5 OS=Rattus norvegicus OX=10116 GN=Igfbp5 PE=4 SV=1 - [A0A0G2JVW1_RAT]	2	1	1	2																																					43.57	4.43	30.2868	8.17725
A0A0G2JXB1	Galectin OS=Rattus norvegicus OX=10116 GN=Lgals3 PE=1 SV=1 - [A0A0G2JXB1_RAT]	3	1	1	3				1.01632				0.940812				1.74051				1.18332				1.09917				0.864144				1.04053				1.39309				0.947184	53.62	4.37	26.319	8.57275
P52873	Pyruvate carboxylase, mitochondrial OS=Rattus norvegicus OX=10116 GN=Pc PE=1 SV=2 - [PYC_RAT]	2	3	3	15	1.15031	0.74076	0.53139	0.765857	0.886155	0.958442	1.663	0.923584	1.00197	1.27086	0.758414	1.58075	0.746057	0.839647	1.4045	0.955123	0.997646	0.906304	0.54237	1.21352	0.614458	1.28806	1.04967	0.760998	1.03768	0.967192	0.948155	0.765538	1.45338	1.10533	0.834954	0.661996	1.17207	0.929595	0.860157	0.788757	118.26	4.33	129.695	6.81494
B0K017	ADP-ribosylhydrolase like 2 (Predicted) OS=Rattus norvegicus OX=10116 GN=Adprhl2 PE=1 SV=1 - [B0K017_RAT]	1	1	1	1																																					38.36	4.32	39.3503	4.95752
Q4KLL0	Transcription elongation factor A protein 1 OS=Rattus norvegicus OX=10116 GN=Tcea1 PE=1 SV=1 - [TCEA1_RAT]	1	1	1	1			1.69794				1.23358				1.39791				0.955681				1.39556				0.866526				1.17959				1.08837				0.998106		36.91	4.32	33.872	8.38232
Q641Y0	Dolichyl-diphosphooligosaccharide--protein glycosyltransferase 48 kDa subunit OS=Rattus norvegicus OX=10116 GN=Ddost PE=2 SV=1 - [OST48_RAT]	1	1	2	4			0.714181	1.14818			0.957762	0.762072			1.05757	0.686481			1.21978	1.00255			0.655783	0.873929			1.38277	0.99068			0.759558	0.78399			1.37373	0.724944			0.941975	1.30151	57.0433	4.31	48.865	5.97314
M0R671	Tensin 2 OS=Rattus norvegicus OX=10116 GN=Tns2 PE=1 SV=1 - [M0R671_RAT]	4	2	6	33		1.18653		0.786661		0.435623		1.33254		0.891427		0.707144		0.543744		0.448826		1.34809		1.14089		0.224287		1.14478		1.3056		0.981266		1.22565		0.619409		1.1575		0.840615	231.25	3.21	151.759	8.38232
B0BNM1	NAD(P)H-hydrate epimerase OS=Rattus norvegicus OX=10116 GN=Naxe PE=2 SV=1 - [NNRE_RAT]	1	1	1	1																																					33.83	4.26	30.8707	6.88818
Q9JKC1	Carboxylic ester hydrolase OS=Rattus norvegicus OX=10116 GN=Bche PE=2 SV=1 - [Q9JKC1_RAT]	1	1	1	2				1.13819				1.05671				1.05101				1.13419				0.873615				1.40292				1.08579				1.17833				0.960716	95.87	4.19	67.7331	6.63916
A0A0G2JSR7	Matrin-3 OS=Rattus norvegicus OX=10116 GN=Matr3 PE=1 SV=1 - [A0A0G2JSR7_RAT]	2	1	2	3		1.13368				0.995065				1.18524				0.692569				1.02307				0.319735				1.08176				1.02712				1.4694			24.27	4.14	94.4438	6.25244
Q6AZ50	Ubiquitin-like-conjugating enzyme ATG3 OS=Rattus norvegicus OX=10116 GN=Atg3 PE=2 SV=1 - [ATG3_RAT]	1	1	1	1			1.46959				1.00505				0.975811				0.850403				1.18145				0.83525				0.941143				0.896893				0.944147		34.32	4.14	35.7995	4.7417
Q66HF1	NADH-ubiquinone oxidoreductase 75 kDa subunit, mitochondrial OS=Rattus norvegicus OX=10116 GN=Ndufs1 PE=1 SV=1 - [NDUS1_RAT]	1	1	2	15	1.03399	1.13494	0.877752	0.940688	1.521	1.03514	1.30819	1.04228	0.785347	1.05329	0.995965	0.997276	0.684588	1.04993	1.33728	0.865352	1.3895	0.965688	0.671345	0.983547	1.79265	1.26512	1.22333	0.974351	1.15617	0.818984	0.799399	0.855251	0.864479	1.17274	1.16789	0.732852	1.03891	0.972934	0.909777	1.2005	69.24	4.13	79.3616	5.89697
A0A140TAD1	ADP-sugar pyrophosphatase OS=Rattus norvegicus OX=10116 GN=Nudt5 PE=1 SV=1 - [A0A140TAD1_RAT]	2	1	1	4	1.29667	0.711652		0.962512	0.858862	0.987593		1.14846	1.56145	0.761684		1.12473	1.14845	0.863782		1.10597	0.695503	0.924929		1.12694	0.780767	0.973225		1.03903	0.764781	0.939583		1.12021	1.23467	0.868145		1.19652	1.07402	1.03146		0.879682	64.24	4.11	24.1153	5.37646
A0A0G2JUB7	Nuclear factor 1 OS=Rattus norvegicus OX=10116 GN=Nfia PE=1 SV=1 - [A0A0G2JUB7_RAT]	11	1	1	2			1.1245				0.896297				1.20377				0.924925				1.06763				1.01134				0.917171				1.27059				1.09951		37.8	4.1	30.1824	8.48486
P11530	Dystrophin OS=Rattus norvegicus OX=10116 GN=Dmd PE=1 SV=2 - [DMD_RAT]	5	3	11	25	1.20619	1.19466	2.84069		0.878812	0.744761	1.14634		0.446709	0.996929	0.830171		1.17937	0.677183	0.484239		1.44608	1.41414	1.41864		1.59973	0.346606	0.719464		0.381041	1.03011	0.753381		0.970036	1.38989	1.30196		0.663012	1.15446	0.608718		95.2729	2.34	425.563	5.90967
D3ZX82	Cytoplasmic FMR1 interacting protein 2 (Predicted) OS=Rattus norvegicus OX=10116 GN=Cyfip2 PE=4 SV=2 - [D3ZX82_RAT]	4	1	2	2		0.946761				1.01362				0.751757				0.972874				0.965877				0.889382				0.88501				1.08299				0.811627			39.63	4.05	68.6343	8.38232
Q63276	Bile acid-CoA:amino acid N-acyltransferase OS=Rattus norvegicus OX=10116 GN=Baat PE=1 SV=2 - [BAAT_RAT]	1	1	1	2				1.25857				1.0233				1.52642				1.41437				0.972799				1.05343				0.907925				0.922687				1.09836	47.74	4.05	46.435	7.41553
Q9QYW3	MOB-like protein phocein OS=Rattus norvegicus OX=10116 GN=Mob4 PE=1 SV=1 - [PHOCN_RAT]	1	1	1	1			1.32212				0.973181				1.03962				1.00845				1.00746				1.27596				1.03202				1.27758				0.840745		26.25	4	26.0156	5.78271
A0A0G2K9I7	Intermediate filament family orphan 2 OS=Rattus norvegicus OX=10116 GN=Aldh4a1 PE=1 SV=1 - [A0A0G2K9I7_RAT]	5	1	1	7		0.869844	0.750672	0.686597		0.986579	1.08643	1.22119		1.16241	0.961111	0.847926		0.882229	1.5546	2.41538		0.775337	0.909984	0.922988		1.06837	1.24804	1.51694		0.660437	0.78148	0.800559		0.857602	0.87781	1.31402		0.917492	1.10539	1.07517	71.6	3.98	57.7516	7.45947
Q5XIL4	Sorbin and SH3 domain containing 3, isoform CRA_b OS=Rattus norvegicus OX=10116 GN=Sorbs3 PE=1 SV=1 - [Q5XIL4_RAT]	1	1	2	6	1.31044	0.836331		0.744782	1.44113	0.628517		1.04239	0.46603	0.713607		0.573446	0.518232	0.850877		0.559293	1.09668	1.07505		0.807957	1.18328	0.449545		0.696139	1.54601	0.880702		1.14363	0.449975	0.718476		0.795444	0.767904	0.740952		1.02651	45.14	3.96	82.0462	9.05615
Q6MG73	Complement C2 OS=Rattus norvegicus OX=10116 GN=C2 PE=1 SV=1 - [Q6MG73_RAT]	1	2	3	4	1.18116				1.02993				1.29568				1.05607				1.63493				1.49623				0.905371				0.699879				1.71709				63.12	2.77	83.6458	7.35693
Q1EG89	Myocardial ischemic preconditioning associated protein 7 OS=Rattus norvegicus OX=10116 GN=Pxn PE=1 SV=1 - [Q1EG89_RAT]	3	1	1	2				0.884228				1.10359				1.16751				0.623705				1.08213				1.14866				1.01194				1.05645				0.786031	46.26	3.95	60.8762	6.30322
P21744	Insulin-like growth factor-binding protein 4 OS=Rattus norvegicus OX=10116 GN=Igfbp4 PE=1 SV=2 - [IBP4_RAT]	1	1	1	3		1.02689				0.822903				0.62004				0.879497				0.923879				0.933174				1.47907				0.817086				1.41089			31.05	3.94	27.7264	7.1665
A0A0G2JST5	Elastin OS=Rattus norvegicus OX=10116 GN=Eln PE=1 SV=1 - [A0A0G2JST5_RAT]	3	2	2	8			1.48148	2.29797			0.827828	1.51181			1.33831	1.15523			1.25357	0.77487			1.75964	1.23098			0.789181	1.68879			0.789758	1.3772			0.816831	1.76342			1.1877	1.08934	72.74	3.94	67.9794	10.3892
G3V8R0	Similar to sid2057p OS=Rattus norvegicus OX=10116 GN=RGD1311703 PE=1 SV=1 - [G3V8R0_RAT]	1	1	1	5	1.70643	0.837744	2.15382		1.55912	0.902288	0.967712		0.637982	0.586346	1.02004		1.43317	0.793821	0.612048		2.16577	0.825856	1.86735		1.16956	0.700262	0.469826		1.13609	1.20812	0.878289		0.707052	0.717667	0.622204		0.698989	1.40978	0.990441		33.6962	3.87	19.9491	4.84326
Q5QD51	A-kinase anchor protein 12 OS=Rattus norvegicus OX=10116 GN=Akap12 PE=1 SV=1 - [AKA12_RAT]	1	1	4	9		0.82484		1.02158		1.21911		1.64316		0.932785		1.01924		1.05823		0.782209		0.982564		1.10363		0.583485		1.37449		1.17367		1.34424		0.828938		1.0965		1.30148		0.766879	64.0333	3.02	181.001	4.39893
P09650	Mast cell protease 1 OS=Rattus norvegicus OX=10116 GN=Mcpt1 PE=1 SV=3 - [MCPT1_RAT]	1	1	1	4			0.887798				1.50593				1.06813				1.49121				0.605177				1.2631				1.31037				1.23005				0.96518		34.35	3.85	28.5988	9.49561
Q62667	Major vault protein OS=Rattus norvegicus OX=10116 GN=Mvp PE=1 SV=4 - [MVP_RAT]	2	1	1	1																																					23.32	3.83	95.7391	5.57959
Q7TP54	Rho family-interacting cell polarization regulator 2 OS=Rattus norvegicus OX=10116 GN=Ripor2 PE=1 SV=1 - [RIPR2_RAT]	6	2	4	10	1.4072	0.978588	1.25927	0.96211	0.883544	1.03292	1.09989	0.877763	1.25137	1.3694	0.797439	1.60679	1.72355	1.01931	0.910071	0.785187	0.693827	1.1706	1.06122	0.94831	0.700785	1.01873	0.667695	0.786343	0.727651	1.35736	0.955656	0.930294	1.61345	1.11677	0.742181	1.22388	1.00865	1.45546	0.81704	0.865425	61.9	3.28	144.619	5.46533
A0A0G2K4Q9	Insulin-like growth factor-binding protein 3 OS=Rattus norvegicus OX=10116 GN=Igfbp3 PE=1 SV=1 - [A0A0G2K4Q9_RAT]	2	1	1	1			2.11258				1.20703				1.33987				1.0309				1.46467				0.865369				1.71408				0.749257				1.75429		28.01	3.81	31.5865	8.6167
O35964	Endophilin-A2 OS=Rattus norvegicus OX=10116 GN=Sh3gl1 PE=1 SV=1 - [SH3G1_RAT]	1	1	1	8		0.91946	0.978221			1.04629	0.950017			0.905466	0.988817			0.926527	0.904186			1.12919	1.64108			0.537142	0.703017			0.997316	1.19653			0.942131	0.935646			1.0284	1.11494		89.82	3.8	41.4662	5.60498
A0JPJ7	Obg-like ATPase 1 OS=Rattus norvegicus OX=10116 GN=Ola1 PE=2 SV=1 - [OLA1_RAT]	1	1	1	9	1.45247		1.242	0.471853	1.15544	0.708954	1.157	0.825324	0.942481	0.704735	0.905957	1.79257	1.41357	1.01236	1.16678	0.56503	1.01528	0.917924	0.9815	0.793727	1.18117	0.826396	1.05617	0.822372	0.886272	0.720232	0.978844	0.707503	0.836875	1.2123	0.95842	0.896096	1.2248	0.618488	1.09042	0.634154	100.643	3.79	44.5072	7.76709
Q6AYQ9	Peptidyl-prolyl cis-trans isomerase OS=Rattus norvegicus OX=10116 GN=Ppic PE=1 SV=1 - [Q6AYQ9_RAT]	1	1	1	5	1.07298	0.916383	0.793741	0.968036	1.16462	0.939068	1.01936	0.877942	1.07256	1.00444	1.05009	1.21061	0.612963	1.03978	0.802001	1.09311	0.672497	0.852216	1.04656	0.961043	0.752099	1.05399	0.742036	0.948745	1.23604	1.00095	0.883687	1.18297	1.10569	0.891422	1.05546	1.03596	1.16254	0.854433	1.1471	0.647723	50.8222	3.77	22.9949	8.1333
D3ZIP8	Uncharacterized protein OS=Rattus norvegicus OX=10116 PE=4 SV=2 - [D3ZIP8_RAT]	1	1	1	3																																					48.16	3.75	38.0841	8.04541
P35446	Spondin-1 OS=Rattus norvegicus OX=10116 GN=Spon1 PE=1 SV=1 - [SPON1_RAT]	2	2	3	7	0.927317	0.617741	1.4128		1.14469	0.994033	0.856057		0.759988	0.656979	0.852483		1.7434	0.974121	1.43111		1.45775	1.00162	1.81946		1.34757	0.899428	0.839256		0.87374	0.875947	1.0232		0.994756	0.792189	0.900453		0.685764	1.21815	0.983963		57.6733	3.72	90.7134	6.11279
D3ZXH7	Aly/REF export factor OS=Rattus norvegicus OX=10116 GN=Alyref PE=1 SV=1 - [D3ZXH7_RAT]	1	1	1	3	1.26076	1.00663	1.5913		1.31414	0.835089	0.815662		0.70523	1.23214	1.12756		2.02853	0.953664	0.866303		1.3529	0.768929	1.16649		2.26145	0.631204	0.90845		1.27012	1.0534	0.981909		1.0707	0.949911	0.942214		1.05189	1.12558	1.49049		33.14	3.7	19.9032	9.86182
B0BNA7	Eukaryotic translation initiation factor 3 subunit I OS=Rattus norvegicus OX=10116 GN=Eif3i PE=2 SV=1 - [EIF3I_RAT]	2	1	1	2		0.978297		1.12707		1.06271		1.00724		1.1652		1.17281		0.955737		0.66195		1.05145		1.17574		0.626536		1.25237		0.990388		1.11791		1.04675		0.938098		1.17021		1.39788	44.24	3.69	36.4376	5.64307
G3V928	LDL receptor-related protein 1 OS=Rattus norvegicus OX=10116 GN=Lrp1 PE=1 SV=1 - [G3V928_RAT]	1	1	11	21			0.702292				0.857529				1.12857				1.79602				0.43135				1.52815				0.944441				1.5127				1.02319		51.9367	2.35	504.558	5.36377
Q924Z9	Netrin-1 OS=Rattus norvegicus OX=10116 GN=Ntn1 PE=1 SV=1 - [NET1_RAT]	2	1	2	2		1.12109				1.21431				0.993655				2.26745				1.0784				1.09823				1.10533				1.06204				0.961639			28.55	3.64	67.8248	8.79248
A0A0G2K518	Sushi domain-containing 2 OS=Rattus norvegicus OX=10116 GN=Susd2 PE=1 SV=1 - [A0A0G2K518_RAT]	3	1	2	3			0.733693	1.05536			0.838408	0.780938			0.630726	0.73701			1.13489	2.02175			0.636461	1.15105			1.51047	1.14364			1.31598	0.895112			1.3026	0.753874			1.13674	0.985874	55.62	3.59	76.8136	6.3667
G3V7L1	Utrophin OS=Rattus norvegicus OX=10116 GN=Utrn PE=1 SV=3 - [G3V7L1_RAT]	2	1	8	18		1.31206				0.931291				1.11276				0.52705				1.4034				0.411331				1.01038				1.44637				0.94641			78.77	2.14	391.069	5.2876
P62944	AP-2 complex subunit beta OS=Rattus norvegicus OX=10116 GN=Ap2b1 PE=1 SV=1 - [AP2B1_RAT]	1	1	3	3																																					30.44	2.13	104.486	5.37646
Q66HF9	Leucine-rich repeat flightless-interacting protein 1 OS=Rattus norvegicus OX=10116 GN=Lrrfip1 PE=1 SV=1 - [LRRF1_RAT]	1	1	2	5	1.16673		1.51073	0.939703	0.778072		0.918784	1.3876	1.41291		1.01954	0.785888	2.25901		0.539757	0.35266	0.772927		1.53172	0.957336	0.922259		0.703402	1.32674	0.842901		1.26644	1.44974	1.53809		0.733346	1.0185	0.7027		0.926944	0.992396	37.77	3.52	79.9706	4.77979
P23680	Serum amyloid P-component OS=Rattus norvegicus OX=10116 GN=Apcs PE=2 SV=2 - [SAMP_RAT]	2	1	1	5	1.40745	1.40292	1.23444	1.53263	0.63534	1.24325	1.34171	0.657218	0.81378	0.858599	0.670979	1.89607	0.881072	1.12657	0.796565	1.45056	0.812697	1.47084	0.775469	0.895086	1.01788	1.51044	0.715591	0.696091	0.654359	1.92598	1.2504	0.981934	1.05374	0.864285	0.718572	0.685242	1.07521	1.35494	1.03249	0.719898	30.13	3.51	26.1591	5.69385
G3V940	Coronin OS=Rattus norvegicus OX=10116 GN=Coro1b PE=1 SV=1 - [G3V940_RAT]	2	1	2	2																																					42.08	3.51	53.904	5.77002
A0A0G2K0X9	Protein transport protein Sec31A OS=Rattus norvegicus OX=10116 GN=Sec31a PE=1 SV=1 - [A0A0G2K0X9_RAT]	3	2	4	4		1.28782	0.881271			0.678198	1.01115			2.19222	1.07051			0.926084	1.09302			0.844064	0.653924			0.368838	1.26072			0.983378	0.866679			1.40927	1.38301			0.743937	0.785602		31.34	2.06	131.887	6.7124
F1LZX9	Integrin subunit alpha V OS=Rattus norvegicus OX=10116 GN=Itgav PE=1 SV=3 - [F1LZX9_RAT]	2	1	4	7	1.01958		0.838072		0.855564		0.883614		0.995587		0.808051		1.02554		0.919226		0.97748		1.05726		1.16892		0.979582		0.740664		1.13043		1.09316		1.17132		1.03855		0.909484		35.57	2.58	115.507	5.80811
Q5PQQ8	Integrin beta-like protein 1 OS=Rattus norvegicus OX=10116 GN=Itgbl1 PE=2 SV=1 - [ITGBL_RAT]	1	1	1	2	1.03985		1.31247		1.14884		0.713063		0.464983		0.743436		2.13525		0.911878		1.35136		1.16516		1.72663		0.693609		1.04039		0.804308		0.961343		0.845979		0.425175		0.602457		21.38	3.44	53.8665	5.50342
Q4V8F9	Hydroxysteroid dehydrogenase-like protein 2 OS=Rattus norvegicus OX=10116 GN=Hsdl2 PE=2 SV=1 - [HSDL2_RAT]	1	1	1	2		1.21329				0.79405				1.06327				0.925939				0.908574				1.53591				0.961783				1.22961				0.771348			53.81	3.44	58.3069	6.18896
G3V811	Coagulation factor XIII A chain OS=Rattus norvegicus OX=10116 GN=F13a1 PE=1 SV=1 - [G3V811_RAT]	2	1	2	3	2.33243			1.32562	1.26045			0.911699	0.916635			1.12791	1.43381			1.54742	1.01468			0.747544	2.13221			1.2544	1.24131			0.918233	0.579286			1.02403	0.873713			1.16795	33.7	3.42	83.0016	5.61768
D3ZQN7	Laminin subunit beta 1 OS=Rattus norvegicus OX=10116 GN=Lamb1 PE=1 SV=3 - [D3ZQN7_RAT]	1	2	5	7			1.10274	0.791246			0.907978	0.69336			1.02264	0.692951			0.93928	0.4331			0.922931	0.899485			1.36332	1.17097			1.05178	0.758836			1.2256	0.657827			0.898621	1.04087	45.24	2.07	197.264	4.97021
D3ZTT7	Sad1 and UNC84 domain-containing 2 OS=Rattus norvegicus OX=10116 GN=Sun2 PE=1 SV=1 - [D3ZTT7_RAT]	1	1	1	3																																					41.18	3.42	81.4773	6.87354
Q5U2U3	Poly [ADP-ribose] polymerase OS=Rattus norvegicus OX=10116 GN=Parp3 PE=1 SV=1 - [Q5U2U3_RAT]	1	1	2	5			0.750453				0.916587				0.989745				1.27011				0.711971				1.22344				0.860129				1.14901				0.946235		50.7921	3.42	58.8317	7.6792
Z4YNH5	Formin-binding protein 1 (Fragment) OS=Rattus norvegicus OX=10116 GN=Fnbp1 PE=1 SV=3 - [Z4YNH5_RAT]	3	1	1	2			1.41228				0.966666				1.00089				1.09796				1.12594				1.07647				1.02081				1.14131				0.906331		31.41	3.41	64.7353	5.38916
P51868	Calsequestrin-2 OS=Rattus norvegicus OX=10116 GN=Casq2 PE=1 SV=2 - [CASQ2_RAT]	2	1	1	7	0.819917	1.40444	0.956659	0.597207	1.6583	1.12277	0.966785	0.909379	0.825252	1.17562	1.66116	1.3077	0.999216	1.14496	0.778455	1.74764	0.912996	0.720418	0.427509	0.648836	1.08325	1.11143	1.24014	1.38675	1.88565	1.10557	1.04297	0.925598	0.828777	1.35893	1.40848	1.76111	0.945547	0.645492	1.46402	1.26308	66.47	3.39	47.8093	4.28467
F8WFH8	Tryptophan--tRNA ligase, cytoplasmic OS=Rattus norvegicus OX=10116 GN=Wars PE=1 SV=1 - [F8WFH8_RAT]	2	1	1	5																																					47.75	3.37	53.3927	6.60986
P47858	ATP-dependent 6-phosphofructokinase, muscle type OS=Rattus norvegicus OX=10116 GN=Pfkm PE=1 SV=3 - [PFKAM_RAT]	3	1	2	10	1.40129	0.806658	0.497144	1.18916	0.854045	0.971209	1.04784	0.870979	0.876834	1.00117	0.680067	1.20628	1.06582	1.04562	1.22628	1.07266	1.12365	0.888732	0.931151	0.984646	0.97036	0.902034	0.854865	0.872889	0.881651	0.732564	0.894246	1.01203	0.722181	0.678634	0.798675	1.09273	1.00058	0.621617	0.781782	1.13391	42.74	3.33	85.5057	8.00146
Q4AEF8	Coatomer subunit gamma-1 OS=Rattus norvegicus OX=10116 GN=Copg1 PE=2 SV=1 - [COPG1_RAT]	4	1	2	10		1.17889	0.636856	1.04903		1.06098	1.21081	0.934593		1.38158	1.02297	1.03909		1.08073	1.19814	0.803012		1.27765	0.588993	0.928006		0.575065	1.25005	1.43061		0.936761	0.829325	0.936546		1.45885	1.51869	1.26738		0.882289	0.820237	0.923925	79.8	3.32	97.5515	5.38916
P35859	Insulin-like growth factor-binding protein complex acid labile subunit OS=Rattus norvegicus OX=10116 GN=Igfals PE=1 SV=1 - [ALS_RAT]	1	1	1	3			0.795251				0.916608				0.984102				1.04476				0.731547				0.905155				0.875262				0.776478				1.00852		32.25	3.32	66.7696	6.52197
D4A650	Peptide-methionine (R)-S-oxide reductase OS=Rattus norvegicus OX=10116 GN=Msrb3 PE=1 SV=3 - [D4A650_RAT]	1	1	1	2	1.48177			0.842154	1.75037			1.26607	0.895933			1.10244	0.684001			0.738196	1.41446			1.04208	2.1253			1.25034	1.27713			0.944728	0.842656			1.48961	0.65163			0.871081	43.74	3.32	29.0143	8.19189
A0A0G2K5E8	Collagen, type I, alpha 2 OS=Rattus norvegicus OX=10116 GN=NEWGENE_621351 PE=1 SV=1 - [A0A0G2K5E8_RAT]	4	2	5	24	1.01656	1.16078	1.04681	1.41292	0.740869	0.621498	0.523765	0.685919	0.594339	1.00744	0.520469	0.738965	0.57959	2.42664	5.19715	0.805819	0.88915	0.53577	0.698392	0.531646	0.83465	0.709777	1.07218	0.515016	0.540282	0.483679	0.464123	0.52698	0.526541	0.421688	0.419958	0.496141	1.313	0.607961	0.500052	2.68163	140	3.3	119.972	9.20264
Q56R17	Importin subunit alpha OS=Rattus norvegicus OX=10116 GN=Kpna4 PE=1 SV=1 - [Q56R17_RAT]	1	1	1	4	0.508077		1.51226	2.21909	0.972342	1.00012	1.35282	1.69778	0.87796	0.952105	1.54271	2.27613	0.603464	1.68009	1.42086	2.16078	1.04396	0.928943	0.791682	1.04242	1.14792	0.976681	1.56182	1.75414	1.00289		1.95093	1.95922	0.967011	1.10892	1.87395	2.57525	1.01442	0.832734	2.29806	2.99498	50.63	3.26	57.8867	4.94482
D3ZLC1	Lamin B2 OS=Rattus norvegicus OX=10116 GN=Lmnb2 PE=1 SV=2 - [D3ZLC1_RAT]	1	1	3	9			1.08948				0.876028				0.989886				0.932892				1.28786				0.945912				1.12727				1.19503				0.633386		59.4567	3.08	68.8089	5.26221
F1M964	Mitochondrial-processing peptidase subunit alpha OS=Rattus norvegicus OX=10116 GN=Pmpca PE=1 SV=2 - [F1M964_RAT]	3	1	1	1			0.349371				1.05342				0.730555				1.10138				1.13353				0.945062				0.669648				0.600014				0.800752		39.15	3.25	58.3437	7.94287
A0A0G2K0V8	Nuclear migration protein nudC-like OS=Rattus norvegicus OX=10116 GN=LOC100911422 PE=4 SV=1 - [A0A0G2K0V8_RAT]	2	1	1	2			0.932172	0.957394			0.979495	1.3801			1.07667	1.13376			0.768008	0.845295			1.04386	1.09619			0.838281	1.03509			1.14367	1.12133			0.839442	1.00072			1.19299	1.06124	34.7	3.23	32.3805	5.8335
A0A0G2JZM2	Protein transport protein SEC23 OS=Rattus norvegicus OX=10116 GN=Sec23a PE=1 SV=1 - [A0A0G2JZM2_RAT]	2	1	2	4	0.710815	1.08204	0.897175		1.7629	1.08812	1.09419		0.670116	1.34449	1.07141		2.85633	1.23494	1.21982		0.95681	1.07255	0.824973		3.13197	0.843335	1.25815		1.10164	0.924002	0.851656		1.68062	1.16131	1.47894		0.618588	0.954529	0.876516		43.34	3.2	84.6585	7.29834
Q9QZA6	CD151 antigen OS=Rattus norvegicus OX=10116 GN=Cd151 PE=1 SV=2 - [CD151_RAT]	1	1	1	2				1.08382				0.854051				0.819167				1.38836				0.938584				0.932064				0.903985				0.84198				1.24611	28.04	3.16	28.3364	7.84033
G3V834	Protein PRRC1 OS=Rattus norvegicus OX=10116 GN=Prrc1 PE=1 SV=1 - [G3V834_RAT]	2	1	1	1		0.704563				1.06332				0.810884				0.968421				0.860295				0.902421				0.916818				1.10534				0.898361			33.85	3.16	46.2496	6.07471
A0A0G2JVY2	CD163 molecule OS=Rattus norvegicus OX=10116 GN=Cd163 PE=1 SV=1 - [A0A0G2JVY2_RAT]	2	3	3	9		0.825267				1.31745				0.998259				1.22274				1.24741				1.44634				1.04791				1.3904				1.26299			61.5109	3.15	119.532	6.17627
Q6AYD6	PDZ and LIM domain protein 2 OS=Rattus norvegicus OX=10116 GN=Pdlim2 PE=1 SV=1 - [PDLI2_RAT]	1	1	1	1			2.1627				0.936021				1.16274				0.598164				1.99682				1.03566				0.917199				1.21095				1.03404		50.56	3.15	37.5567	8.646
D3ZUF9	Pitrilysin metallepetidase 1 (Predicted) OS=Rattus norvegicus OX=10116 GN=Pitrm1 PE=1 SV=1 - [D3ZUF9_RAT]	2	1	2	4		1.4057				1.10258				1.19941				1.02291				1.05768				1.25689				1.19663				1.03089				1.38164			31.38	3.14	108.475	7.32764
F1LPQ9	A-kinase anchor protein 2 OS=Rattus norvegicus OX=10116 GN=Akap2 PE=1 SV=2 - [F1LPQ9_RAT]	2	1	2	3	0.990844	0.915829			0.547972	0.718977			0.902927	0.652011			2.71992	0.610618			0.803785	1.1654			1.11706	0.494146			0.567962	1.16933			1.61253	0.984935			0.584366	1.07085			30.19	3.1	95.8833	5.17334
A0A0G2JVH7	WAS protein family, member 2 OS=Rattus norvegicus OX=10116 GN=Wasf2 PE=1 SV=1 - [A0A0G2JVH7_RAT]	3	1	1	1			0.904022				0.810838				1.03373				0.780485				1.38422				0.747011				1.10202				1.0541				0.721226		36.11	3.1	45.3098	7.73779
A0A0G2JXC1	Protein ERGIC-53 OS=Rattus norvegicus OX=10116 GN=Lman1 PE=1 SV=1 - [A0A0G2JXC1_RAT]	3	1	2	5	0.841358		0.820452		1.22999		0.956709		0.877278		0.916237		0.681276		1.32743		1.08348		0.72941		1.10747		1.24377		1.01124		0.906792		0.781128		1.26821		1.30573		0.932064		32.35	3.09	58.059	6.49365
P18614	Integrin alpha-1 OS=Rattus norvegicus OX=10116 GN=Itga1 PE=1 SV=1 - [ITA1_RAT]	1	2	4	4			1.1007				0.772726				0.840306				1.11308				0.80338				1.3727				1.22854				1.31668				1.02542		48.02	3.05	130.726	5.96045
F1LM33	Leucine-rich PPR motif-containing protein, mitochondrial OS=Rattus norvegicus OX=10116 GN=Lrpprc PE=1 SV=2 - [F1LM33_RAT]	2	1	3	17	1.0732				0.953825				0.86212				0.885818				1.31654				0.949754				0.968659				1.00203				1.25854				48.4167	3.02	156.581	6.60986
F8WFR6	Glycogenin-1 OS=Rattus norvegicus OX=10116 GN=Gyg1 PE=1 SV=1 - [F8WFR6_RAT]	3	1	1	2	0.779381				1.14561				1.19571				0.570049				0.930193				0.987369				1.15501				1.14892				1.3862				43.8	3.02	37.1224	5.38916
F1LUS2	Protein argonaute-3 OS=Rattus norvegicus OX=10116 GN=Ago3 PE=3 SV=3 - [F1LUS2_RAT]	3	1	2	2																																					43.7	3.02	97.3081	9.11475
P21531	60S ribosomal protein L3 OS=Rattus norvegicus OX=10116 GN=Rpl3 PE=1 SV=3 - [RL3_RAT]	1	1	1	1			0.888291				1.07751				1.02935				0.935555				0.41878				1.49231				0.735572				1.67982				0.733276		58.39	2.98	46.1068	10.2134
D3ZWC6	Syntrophin, basic 1 (Predicted) OS=Rattus norvegicus OX=10116 GN=Sntb1 PE=1 SV=1 - [D3ZWC6_RAT]	2	1	2	7																																					34.51	2.97	58.2561	8.30908
Q5XIP0	DnaJ (Hsp40) homolog, subfamily B, member 4 OS=Rattus norvegicus OX=10116 GN=Dnajb4 PE=1 SV=1 - [Q5XIP0_RAT]	1	1	1	2			0.896917				0.915222				1.1561				0.92175				0.970097				1.2211				0.947649				1.60255				1.11071		42.61	2.97	37.7982	8.5874
Q68FS2	COP9 signalosome complex subunit 4 OS=Rattus norvegicus OX=10116 GN=Cops4 PE=1 SV=1 - [CSN4_RAT]	1	1	1	1			1.37641				0.946197				1.06794				1.01156				1.04462				1.08508				0.869494				1.10544				0.862455		42.76	2.96	46.2607	5.84619
F1LQS6	RCG61833 OS=Rattus norvegicus OX=10116 GN=Xdh PE=1 SV=2 - [F1LQS6_RAT]	11	1	3	4																																					39.1533	2.93	146.171	7.25439
Q66HF3	Electron transfer flavoprotein-ubiquinone oxidoreductase, mitochondrial OS=Rattus norvegicus OX=10116 GN=Etfdh PE=1 SV=1 - [Q66HF3_RAT]	2	2	2	5	1.22296	1.02984			0.897276	0.902055			1.03511	0.837235			0.842532	1.01457			1.43244	0.791361			0.861889	2.1343			1.43283	0.913772			1.01576	1.04189			1.32798	0.91221			56.9767	2.92	68.1207	7.56201
O35142	Coatomer subunit beta' OS=Rattus norvegicus OX=10116 GN=Copb2 PE=1 SV=3 - [COPB2_RAT]	2	1	3	5		1.19436				0.881684				1.53121				1.03082				1.18936				0.463878				0.853013				1.47845				0.91558			31.05	2.1	102.486	5.2749
Q08420	Extracellular superoxide dismutase [Cu-Zn] OS=Rattus norvegicus OX=10116 GN=Sod3 PE=1 SV=2 - [SODE_RAT]	1	1	1	2	1.88604		2.38052		1.7689		1.09792		0.765417		1.22378		1.9563		0.835456		1.99045		1.71619		1.73639		0.697529		1.67618		1.29583		0.813323		0.715722		0.81097		1.14911		28.65	2.87	26.6031	6.59521
Q5XIE6	3-hydroxyisobutyryl-CoA hydrolase, mitochondrial OS=Rattus norvegicus OX=10116 GN=Hibch PE=1 SV=2 - [HIBCH_RAT]	1	1	1	2	0.719376		0.564216		1.61647		1.50626		0.92481		1.40495		0.406034		1.32698		1.8378		0.590871		1.25314		1.47247		1.43699		1.01359		0.757898		1.54868		1.02253		1.67568		34.1	2.86	42.9973	8.45557
[truncated: 76 more rows]
