# Supplementary material for: Red-Fleshed Apples Rich in Anthocyanins and White-Fleshed Apples Modulate the Aorta and Heart Proteome in Hypercholesterolaemic Rats: The AppleCOR Study
Source: Nutrients. 2022 Feb 28;14(5):1047. doi: 10.3390/nu14051047 (PMC8912372; doi:10.3390/nu14051047)
Supplement: Supplementary file 1 [file nutrients-14-01047-s001.zip › Supplementary Table S6_BBDD heart.xlsx]

## Sheet: Sheet1
Accession	Description	Σ# Proteins	Σ# Unique Peptides	Σ# Peptides	Σ# PSMs	HFD+ANTO - M2 G5	HFD - F1 G2	HFD+ANTO - F2 G5	HFD - M1 G2	HFD+WA - M2 G4	STD - F1 G1	HFD+WA - F2 G4	STD - M1 G1	STD - M3 G1	HFD+WA - F1 G4	STD - F3 G1	HFD+WA - M1 G4	HFD+ATOR - M2 G6	HFD+RA - F1 G3	HFD+ATOR - F2 G6	HFD+RA - M1 G3	HFD+RA - M3 G3	HFD+ATOR - F1 G6	HFD+RA - F3 G3	HFD+ATOR - M1 G6	HFD - M3 G2	HFD+ANTO - F1 G5	HFD - F3 G2	HFD+ANTO - M1 G5	HFD+ANTO - M3 G5	HFD - F2 G2	HFD+ANTO - F3 G5	HFD - M2 G2	HFD+WA - M3 G4	STD - F2 G1	HFD+WA - F3 G4	STD - M2 G1	HFD+ATOR - M3 G6	HFD+RA - F2 G3	HFD+ATOR - F3 G6	HFD+RA - M2 G3	SCORE	Coverage	MW [kDa]	calc. pI
Q9QZ76	Myoglobin OS=Rattus norvegicus OX=10116 GN=Mb PE=1 SV=3 - [MYG_RAT]	1	21	26	1522	1.4557	1.36946	0.728329	1.86841	1.23465	0.979116	0.724845	0.912143	0.95158	0.885175	0.853575	0.768577	0.767543	0.730706	1.04102	1.37964	0.698554	0.708589	0.781932	0.847117	1.01174	1.82222	1.00671	1.70804	1.48979	2.07281	1.33475	1.33937	1.11501	0.770538	0.893526	0.747174	0.843236	0.831119	0.67412	1.32453	6703.18	98.05	17.146	8.104
P08733	Myosin regulatory light chain 2, ventricular/cardiac muscle isoform OS=Rattus norvegicus OX=10116 GN=Myl2 PE=1 SV=2 - [MLRV_RAT]	3	20	30	1312	1.75138	1.25802	0.94717	1.65511	1.17487	0.756947	0.628459	0.625751	0.66659	0.525526	0.855659	1.16798	0.479886	0.72205	1.6362	1.38364	0.496079	0.821119	0.940977	0.644296	0.831266	1.12164	0.622448	1.48295	1.06395	1.44	0.973487	1.39972	0.841572	1.46532	1.6327	0.745851	0.790494	0.564041	0.908456	1.15818	3519.45	95.78	18.8684	4.93213
A0A0G2JSW3	Globin a4 OS=Rattus norvegicus OX=10116 GN=Hbb PE=1 SV=1 - [A0A0G2JSW3_RAT]	4	6	19	575	1.35578	0.912499	0.544984	1.51788	1.51243	1.8067	0.432829	0.660528	0.583536	0.571713	0.946004	1.55383	0.525258	0.268067	1.09143	0.887362	0.473855	0.249184	1.77936	0.416843	1.9535	0.640029	0.392996	2.71975	2.31506	1.04656	0.678234	1.0505	1.47319	0.637379	0.751966	0.787376	0.807894	0.493474	0.982988	0.787452	3676.79	95.24	15.9552	8.07471
P01946	Hemoglobin subunit alpha-1/2 OS=Rattus norvegicus OX=10116 GN=Hba1 PE=1 SV=3 - [HBA_RAT]	2	2	13	474	1.3454	0.75347	0.44198	1.24555	1.37852	1.72873	0.593455	0.656993	0.622113	0.745467	1.20624	1.77112	0.56353	0.366291	0.777404	0.721541	0.490805	0.332086	2.536	0.545705	1.81034	0.532523	0.385089	1.99865	2.72006	0.922451	0.560296	1.01782	1.70835	1.31914	0.896919	1.27063	0.751044	0.529611	0.596474	0.74521	1773.08	95.07	15.3188	7.97217
P11517	Hemoglobin subunit beta-2 OS=Rattus norvegicus OX=10116 PE=1 SV=2 - [HBB2_RAT]	4	5	17	528	1.23651	0.813229	0.215493	2.86918	1.32801	1.85152	0.399643	0.66751	0.515105	0.685001	1.35189	0.993046	0.529657	0.305361	0.623819	1.03613	0.705987	0.295248	3.91993	0.476282	2.34117	0.532648	0.364971	4.65826	1.48362	0.674065	0.518945	1.02474	1.71125	1.05197	0.33031	2.35184	0.635354	0.690535	0.52622	0.831352	2998.2	93.88	15.9723	8.79248
A0A0G2JSV6	Globin c2 OS=Rattus norvegicus OX=10116 GN=Hba-a2 PE=1 SV=1 - [A0A0G2JSV6_RAT]	2	2	12	467	1.3891	0.84211	0.376049	1.25194	1.29256	2.03294	0.912454	0.739349	0.659189	0.621241	1.14719	2.56169	0.75542	0.295747	1.71853	0.729344	0.529721	0.353825	3.03902	0.410396	2.43532	0.568118	0.663212	2.71296	3.00003	0.922615	0.426661	0.754338	2.25561	1.07306	1.40786	1.4244	0.663786	0.482958	1.23491	0.711608	1813.16	91.55	15.2748	8.30908
P07483	Fatty acid-binding protein, heart OS=Rattus norvegicus OX=10116 GN=Fabp3 PE=1 SV=2 - [FABPH_RAT]	1	9	17	517	1.19319	1.21352	0.990267	1.10738	0.805962	0.828129	0.873431	0.766572	0.824769	0.866901	1.16704	1.30701	0.699107	0.846037	1.16749	0.85397	0.738567	1.0474	1.08771	0.940527	0.681598	1.21142	0.741861	1.14884	0.8843	1.02784	1.04817	1.18322	0.829144	2.04028	1.31871	1.13439	0.913741	0.706537	1.03813	0.997196	1910.4	90.23	14.7656	6.32861
P23928	Alpha-crystallin B chain OS=Rattus norvegicus OX=10116 GN=Cryab PE=1 SV=1 - [CRYAB_RAT]	1	8	22	392	1.50477	1.02157	0.917347	1.28722	1.08621	0.705245	1.08322	0.65423	0.901581	0.666233	0.743806	1.08218	0.630277	0.893946	1.5174	1.07865	0.664716	1.06024	1.02419	0.753284	0.626861	1.03085	0.730699	1.08509	0.842548	1.43913	0.62027	1.0332	0.83786	1.76721	1.81453	0.976795	0.922111	0.687229	0.905219	1.10987	794.411	85.71	20.0763	7.32764
Q5XFX0	Transgelin-2 OS=Rattus norvegicus OX=10116 GN=Tagln2 PE=1 SV=1 - [TAGL2_RAT]	2	7	15	72	1.79551	1.02532	0.893852	1.6791	1.26773	0.846466	0.640429	0.731426	0.741542	0.505254	0.652145	0.932464	0.583588	0.824075	1.8166	1.23402	0.66763	0.897497	0.669382	0.644675	0.985413	1.10351	0.675125	1.40289	1.03541	1.37467	1.3625	1.19239	0.682043	1.33367	1.87235	0.724908	0.951502	0.779765	0.887852	1.01933	258.924	74.37	22.3791	8.25049
O88767	Protein/nucleic acid deglycase DJ-1 OS=Rattus norvegicus OX=10116 GN=Park7 PE=1 SV=1 - [PARK7_RAT]	2	10	19	189	1.34744	1.10989	1.08929	1.19945	0.984431	0.768169	1.00152	0.769101	0.74862	0.805426	1.05192	1.41111	0.630602	0.832674	1.53551	1.02466	0.741081	0.950875	1.07685	0.824353	0.650954	1.13987	0.837344	1.38257	0.874232	1.35896	0.972388	1.17642	0.900051	1.95324	1.53138	0.985913	0.84987	0.716634	1.02244	1.0818	899.378	80.95	19.9614	6.771
P26772	10 kDa heat shock protein, mitochondrial OS=Rattus norvegicus OX=10116 GN=Hspe1 PE=1 SV=3 - [CH10_RAT]	2	9	16	348	1.73181	0.99231	0.979365	1.35847	1.14114	0.637347	0.892619	0.497111	0.60117	0.506124	1.05562	1.47778	0.37295	0.746762	1.7405	0.917796	0.453257	0.993769	1.17703	0.63699	0.494255	0.963077	0.558607	1.76142	0.822564	1.53093	0.628438	1.22239	0.714113	2.30013	1.61338	0.842605	0.621894	0.504753	1.22365	1.08503	981.146	88.24	10.8949	8.92432
P39069	Adenylate kinase isoenzyme 1 OS=Rattus norvegicus OX=10116 GN=Ak1 PE=1 SV=3 - [KAD1_RAT]	3	10	23	271	1.34173	1.01735	1.03431	1.40677	0.958492	0.757808	0.94702	0.744175	0.789554	0.682144	0.940122	1.35968	0.613918	0.778464	1.65699	0.994916	0.566748	0.893459	0.837312	0.758638	0.665275	1.01726	0.768364	1.42089	1.03383	1.31215	0.845328	1.22228	0.847093	1.9139	1.70133	0.942218	0.822159	0.703618	1.0934	1.09985	1059.58	88.14	21.5702	7.89893
Q63362	NADH dehydrogenase [ubiquinone] 1 alpha subcomplex subunit 5 OS=Rattus norvegicus OX=10116 GN=Ndufa5 PE=1 SV=3 - [NDUA5_RAT]	1	7	15	104	1.3013	1.23239	0.793713	1.3608	1.0546	0.905077	0.658977	0.957569	0.935435	0.922448	0.927761	0.94704	0.774588	0.885798	1.20663	1.37554	0.752862	0.824488	1.0348	1.11648	0.878971	1.0747	0.878757	1.64677	0.999163	1.58484	0.889819	1.0948	0.931304	0.970445	0.864675	0.887066	0.830089	0.84998	0.66641	1.32548	473.418	87.07	13.4033	7.43018
P48500	Triosephosphate isomerase OS=Rattus norvegicus OX=10116 GN=Tpi1 PE=1 SV=2 - [TPIS_RAT]	3	18	24	412	1.08453	0.992942	1.06414	1.17021	0.890747	0.885167	0.92845	0.856712	0.80854	0.862022	1.03868	1.23483	0.786784	0.940247	1.16612	1.06651	0.837092	0.905879	1.04566	0.906399	0.763535	0.97718	0.869857	1.20024	0.90837	1.1131	0.920093	1.08362	0.920183	1.49744	1.06039	1.00334	0.838369	0.87289	0.874843	1.02434	1985.7	86.75	26.8318	7.23975
P80254	D-dopachrome decarboxylase OS=Rattus norvegicus OX=10116 GN=Ddt PE=1 SV=3 - [DOPD_RAT]	1	5	10	97	1.50998	1.18294	1.02069	1.13616	0.991066	0.736824	1.03167	0.762936	0.842619	0.756282	0.888737	1.36262	0.657268	0.888669	1.5875	1.09363	0.685982	1.07657	0.94869	0.76966	0.661057	1.18116	0.753942	0.984375	0.944348	1.38151	0.782063	1.1599	0.910647	1.76615	1.91349	0.995197	0.819642	0.750946	1.17151	1.17026	284.33	75.42	13.1248	6.53662
P16409	Myosin light chain 3 OS=Rattus norvegicus OX=10116 GN=Myl3 PE=1 SV=2 - [MYL3_RAT]	1	13	24	507	1.86586	1.82622	1.27002	1.34169	0.768507	0.921722	0.608652	0.449184	0.612078	0.515484	0.662308	0.900198	0.549943	0.949835	2.16092	1.1052	0.56759	0.886645	0.842711	0.459275	0.797085	1.35822	0.737901	0.845967	1.15342	1.13905	0.875748	1.01854	0.945414	1.6154	1.63039	0.75505	0.996689	0.457691	1.08501	1.00109	1727.31	84.5	22.1421	5.09717
P31399	ATP synthase subunit d, mitochondrial OS=Rattus norvegicus OX=10116 GN=Atp5pd PE=1 SV=3 - [ATP5H_RAT]	2	10	13	345	1.67799	1.06913	0.987439	1.68219	1.22531	0.639403	0.726931	0.56593	0.619739	0.501515	0.91625	1.37727	0.410143	0.704969	1.96198	1.33845	0.462939	0.85846	0.946266	0.554788	0.707343	1.10724	0.587548	1.83058	0.919187	1.68142	0.889635	1.40812	0.750593	1.71868	2.0058	0.734757	0.70007	0.578017	1.24494	0.994217	911.25	85.71	18.7516	6.59521
P05065	Fructose-bisphosphate aldolase A OS=Rattus norvegicus OX=10116 GN=Aldoa PE=1 SV=2 - [ALDOA_RAT]	6	21	38	558	0.742562	0.998899	1.0987	0.857397	0.889009	1.03645	0.928561	1.03782	0.933343	1.04544	0.93132	1.22426	1.03704	1.0049	0.923199	0.97535	1.04638	0.988769	1.00053	0.987407	1.0352	1.01895	1.0051	0.912085	0.91629	0.721508	0.950247	0.865172	0.986725	1.40583	0.862531	1.11213	0.965885	1.00384	0.84301	0.953781	1802.68	85.16	39.3273	8.08936
P10111	Peptidyl-prolyl cis-trans isomerase A OS=Rattus norvegicus OX=10116 GN=Ppia PE=1 SV=2 - [PPIA_RAT]	4	7	13	202	1.54484	0.93679	1.17133	1.18713	0.904371	0.807616	1.12622	0.839943	0.73496	0.725982	0.739153	1.46377	0.661862	0.836578	1.58145	1.04891	0.739318	0.984472	1.0578	0.826976	0.706908	0.906693	0.774382	1.1654	0.829568	1.02322	0.711212	1.10421	0.847752	1.86751	1.77167	1.06357	0.884166	0.747033	0.967531	1.05118	453.56	85.37	17.8628	8.1626
P04692	Tropomyosin alpha-1 chain OS=Rattus norvegicus OX=10116 GN=Tpm1 PE=1 SV=3 - [TPM1_RAT]	9	23	54	879	1.84915	1.1651	0.95286	1.61304	0.887172	0.446614	0.692629	0.457747	0.517282	0.389852	0.813013	1.23186	0.375216	0.628995	1.90632	1.28074	0.402969	0.848815	1.16141	0.576221	0.547695	1.04822	0.511613	1.77313	1.07452	2.00477	0.725867	1.55292	0.720164	1.65723	1.76531	0.760389	0.632287	0.416002	1.41039	1.1561	2264.42	78.52	32.6607	4.7417
P70623	Fatty acid-binding protein, adipocyte OS=Rattus norvegicus OX=10116 GN=Fabp4 PE=1 SV=3 - [FABP4_RAT]	5	7	12	63	0.575027	0.996921	0.699033	0.72984	0.864145	1.23677	1.06362	1.00008	1.46448	1.2488	1.37161	1.11091	1.09943	1.04913	0.533318	0.944473	1.13293	0.872248	1.19807	0.954815	0.943813	0.964727	1.2066	0.932133	1.08502	0.782482	1.1349	1.19953	0.993776	1.39688	0.675078	1.33729	1.00151	0.97842	0.590848	0.961889	174.336	73.48	14.6986	7.94287
P02770	Serum albumin OS=Rattus norvegicus OX=10116 GN=Alb PE=1 SV=2 - [ALBU_RAT]	1	3	74	3379	2.14149	0.270024	0.809332	0.138698	0.0723536	0.283513	0.331822	0.416368	0.86537	0.882897	0.0957116	4.69914	0.131937	0.991946	0.796675	2.0602	0.875455	0.177735	1.68397	0.442964	0.840625	1.16181	0.229067	2.05545	0.275483	4.87515	0.914791	1.91871	0.069071	0.219107	1.2702	0.232924	1.22416	0.119783	0.613454	0.83907	11225.6	82.89	68.6861	6.48096
A0A0G2JSH5	Serum albumin OS=Rattus norvegicus OX=10116 GN=Alb PE=1 SV=1 - [A0A0G2JSH5_RAT]	1	2	74	3451	1.92389	1.38174	0.660743	2.05019	1.83413	1.1158	1.33384	0.370562	0.409559	0.48539	1.38749	0.129229	0.844084	0.594077	1.3736	0.0472387	0.592561	1.44673	1.18334	0.295253	0.535697	0.780035	0.38071	1.45575	2.09602	0.110585	0.393236	0.944262	1.42415	2.99526	1.28008	1.04957	0.780607	0.853726	0.336572	0.625301	11875.8	82.89	68.7141	6.48096
P31044	Phosphatidylethanolamine-binding protein 1 OS=Rattus norvegicus OX=10116 GN=Pebp1 PE=1 SV=3 - [PEBP1_RAT]	1	12	14	172	1.35973	1.10334	0.886865	1.24984	0.950131	0.617898	0.947295	0.615374	0.733146	0.71455	0.917195	1.34509	0.561151	0.89329	1.73661	0.768478	0.627224	0.929184	0.738631	0.645087	0.645058	1.14443	0.740708	1.33043	1.1909	1.54902	0.873336	1.3325	0.906884	2.01919	1.87818	0.842941	0.80302	0.610081	0.940789	1.13784	805.901	83.42	20.7884	5.79541
G3V9U2	3-ketoacyl-CoA thiolase, mitochondrial OS=Rattus norvegicus OX=10116 GN=Acaa2 PE=1 SV=3 - [G3V9U2_RAT]	3	24	34	423	0.572579	1.00005	0.940676	0.736259	0.736868	1.09073	1.09874	0.884824	0.968274	0.935967	1.43202	1.01837	1.10574	1.09102	0.971957	0.722181	0.947573	1.17503	1.07085	1.19263	0.914817	1.08857	1.20469	0.962704	1.13712	0.803397	1.44418	1.05471	0.686443	1.47121	0.874014	1.3421	0.987566	1.0437	0.874506	0.926602	1585.84	81.11	41.8585	8.14795
Q9Z2L0	Voltage-dependent anion-selective channel protein 1 OS=Rattus norvegicus OX=10116 GN=Vdac1 PE=1 SV=4 - [VDAC1_RAT]	1	17	25	376	0.803677	0.839927	1.00743	0.950015	0.835004	1.02253	1.08758	0.928491	1.00348	1.0221	0.916295	1.45626	0.875155	1.02362	1.07798	0.992886	0.947197	0.981298	1.14342	0.875235	0.861517	0.895027	0.978949	1.06642	0.820032	0.951617	0.872029	0.877699	0.956339	1.97776	1.15453	1.16414	0.945724	0.917547	0.98576	0.969436	1752.8	82.69	30.7366	8.54346
P63039	60 kDa heat shock protein, mitochondrial OS=Rattus norvegicus OX=10116 GN=Hspd1 PE=1 SV=1 - [CH60_RAT]	1	35	51	717	0.999289	0.94451	1.10513	1.19088	1.12994	0.9482	0.847301	0.855874	0.896292	0.897111	1.13464	1.28882	0.738826	0.863806	1.19536	1.16471	0.808534	0.792896	0.991132	0.983524	0.915052	1.22322	0.969717	1.42819	0.869957	1.14999	0.997416	1.07344	0.958408	1.30473	0.886028	0.84859	0.83003	0.855109	1.03755	1.00657	2784.56	76.44	60.9174	6.17627
P04642	L-lactate dehydrogenase A chain OS=Rattus norvegicus OX=10116 GN=Ldha PE=1 SV=1 - [LDHA_RAT]	4	14	26	412	0.686524	0.942757	1.01782	0.690178	0.986419	1.23178	1.06693	1.29462	1.39989	1.26706	1.13303	0.580308	1.24948	1.0767	0.670001	1.02576	1.26788	1.07242	1.00576	1.15235	1.11937	1.0904	1.38532	0.836033	1.16898	0.67981	1.12619	0.985292	1.03207	0.526836	0.966163	1.1785	1.0626	1.27768	0.790535	0.977479	2223.12	80.12	36.4273	8.26514
D4A4D5	Similar to 60S acidic ribosomal protein P2 OS=Rattus norvegicus OX=10116 GN=LOC498555 PE=3 SV=1 - [D4A4D5_RAT]	3	4	7	65	1.88909	1.08867	0.850539	1.48656	1.08441	0.525878	1.01928	0.628475	0.652759	0.561064	0.805702	1.26967	0.542263	0.735881	1.55449	0.990018	0.521487	1.05812	0.955404	0.777872	0.575834	1.00654	0.62258	1.36276	1.06492	1.61604	0.809007	1.41489	0.882291	1.92237	1.73913	0.771615	0.721583	0.562958	1.08341	1.29382	297.11	80.87	11.6989	4.53857
Q05962	ADP/ATP translocase 1 OS=Rattus norvegicus OX=10116 GN=Slc25a4 PE=1 SV=3 - [ADT1_RAT]	4	13	32	951	0.461366	0.801749	0.864136	0.519824	0.969433	1.42892	1.12822	1.25528	1.53372	1.42211	1.19098	0.498258	1.22759	1.24346	0.431649	1.02646	1.2425	1.05502	1.08872	0.912417	1.30229	0.902674	1.37954	0.710295	0.995496	0.604292	1.28247	0.959379	1.04118	0.441855	0.716816	1.35131	1.06736	1.20917	0.602016	0.830608	3036.23	80.54	32.9682	9.78857
P11030	Acyl-CoA-binding protein OS=Rattus norvegicus OX=10116 GN=Dbi PE=1 SV=3 - [ACBP_RAT]	2	3	8	141	1.12001	0.928929	0.968995	1.54602	0.935517	0.736159	0.765342	0.604175	0.643271	0.402889	1.06838	1.33094	0.456901	0.631762	2.00419	1.24919	0.344276	0.841003	0.733267	0.530511	0.67933	1.12849	0.708918	1.98913	0.998442	1.98207	0.999253	1.36985	0.667377	1.92962	2.16645	0.723066	0.785291	0.556848	1.15124	0.954964	487.779	67.82	10.0212	8.82178
D4A5L9	Uncharacterized protein OS=Rattus norvegicus OX=10116 PE=3 SV=1 - [D4A5L9_RAT]	3	10	19	308	1.00053	1.06943	0.959389	1.04222	0.789718	0.817377	0.696527	0.986601	1.04653	1.07175	0.927174	1.07851	0.916303	0.907148	1.07401	1.03834	0.855255	0.775143	0.94432	0.907935	0.972024	0.966938	0.849233	1.28307	1.08765	1.08011	0.778396	0.868403	0.985731	1.14464	1.02908	0.78238	0.832097	0.92942	0.813063	1.04595	1174.87	80	11.628	9.5835
P29419	ATP synthase subunit e, mitochondrial OS=Rattus norvegicus OX=10116 GN=Atp5me PE=1 SV=3 - [ATP5I_RAT]	1	6	9	130	0.600498	0.703223	1.01573	1.15217	0.933443	0.956882	0.830885	0.846806	0.856445	0.867883	1.36998	1.86457	0.690478	0.815517	0.763613	1.49109	0.828822	0.79283	1.60782	0.743423	0.958358	0.886831	0.865763	2.88258	0.741339	1.00528	0.902374	1.00373	0.79141	0.993261	0.828175	0.970033	0.759857	0.89166	0.984774	0.800112	580.333	77.46	8.24948	9.34912
Q5M9I5	Cytochrome b-c1 complex subunit 6, mitochondrial OS=Rattus norvegicus OX=10116 GN=Uqcrh PE=3 SV=1 - [QCR6_RAT]	1	2	10	104	1.5324	0.909663	1.03131	1.25006	1.14308	0.699502	0.884209	0.748683	0.683422	0.789814	0.88297	1.22396	0.641434	0.725244	1.65194	1.11817	0.717494	0.957755	1.09381	0.786243	0.811788	0.805668	0.792077	1.52593	1.09262	1.42256	0.903066	1.22336	0.893744	1.43248	1.57609	0.872547	0.838729	0.689406	1.04645	1.01956	483.143	78.65	10.417	4.97021
G3V6D3	ATP synthase subunit beta OS=Rattus norvegicus OX=10116 GN=Atp5f1b PE=1 SV=1 - [G3V6D3_RAT]	2	30	37	2602	1.04098	1.05153	1.09685	1.10857	1.06296	1.05746	0.867832	1.06186	0.938116	0.941437	0.93258	1.21915	0.843762	0.926433	1.25055	1.03552	0.858337	0.800182	0.782949	0.985264	1.13476	1.51183	1.04313	0.867317	1.00305	0.915616	1.20278	1.0286	1.13113	1.04837	0.975516	0.852914	0.983394	0.917986	1.16133	1.06789	11008	77.88	56.3095	5.2749
P13803	Electron transfer flavoprotein subunit alpha, mitochondrial OS=Rattus norvegicus OX=10116 GN=Etfa PE=1 SV=4 - [ETFA_RAT]	1	20	25	462	0.879857	0.994763	1.07231	0.917519	0.833022	0.992185	0.989946	0.936495	1.05351	1.05756	1.08566	1.53016	0.864314	1.01897	1.25421	0.873791	1.00228	0.925725	1.011	0.80178	0.975521	1.23261	0.968032	0.916372	0.858521	0.955449	1.01521	1.02152	1.04808	1.75633	1.1098	1.05925	0.933827	0.896465	0.941228	1.09259	2077.9	76.88	34.9295	8.38232
P11980	Pyruvate kinase PKM OS=Rattus norvegicus OX=10116 GN=Pkm PE=1 SV=3 - [KPYM_RAT]	5	30	40	312	0.795902	0.896348	0.936192	0.746898	1.07608	1.24112	0.999899	1.11822	1.11524	1.12385	1.06286	0.806434	1.11148	1.03054	0.73928	1.05918	1.1747	0.913587	0.971179	1.26252	1.18409	1.03523	1.16701	0.945896	1.04046	0.803076	1.21143	0.901821	1.10766	0.605278	0.89756	1.07748	1.04654	1.11425	0.845881	0.946199	1298.16	69.87	57.7809	7.06396
D4A0T0	NADH:ubiquinone oxidoreductase subunit B10 OS=Rattus norvegicus OX=10116 GN=Ndufb10 PE=1 SV=1 - [D4A0T0_RAT]	1	11	15	329	1.42553	0.987639	0.833722	1.36951	1.02904	0.593839	0.789654	0.60238	0.646692	0.536446	0.92163	1.41639	0.49668	0.816808	1.71206	1.0599	0.521634	0.875002	1.02827	0.551682	0.532661	0.938258	0.624555	1.6545	0.976494	1.87307	0.730605	1.2877	0.757622	1.86716	1.7647	0.805479	0.721151	0.58653	0.837242	1.14659	1388.1	76.14	20.8454	7.69385
Q06647	ATP synthase subunit O, mitochondrial OS=Rattus norvegicus OX=10116 GN=Atp5po PE=1 SV=1 - [ATPO_RAT]	1	10	16	319	0.726447	0.879266	1.1741	1.03652	1.03413	0.94419	0.670481	1.17363	1.00192	1.227	0.839224	1.0312	1.10303	0.994595	0.701241	1.42031	0.999958	0.863192	1.13392	1.12158	1.29445	0.812146	1.04348	1.71473	1.0559	0.89857	0.918053	0.837519	1.01004	0.612648	0.817417	0.9153	0.903103	1.13508	0.846557	0.924998	1399.13	65.26	23.3828	10.0229
D3ZD09	Cytochrome c oxidase subunit OS=Rattus norvegicus OX=10116 GN=Cox6b1 PE=1 SV=1 - [D3ZD09_RAT]	2	7	12	390	1.27084	0.832418	0.926657	1.47368	1.03295	0.629768	0.818928	0.62601	0.743656	0.579637	1.03466	1.64205	0.522689	0.849129	1.6619	1.21178	0.535878	1.04557	1.34447	0.500035	0.582924	0.83788	0.636221	1.8805	0.961711	1.76075	0.698164	1.39858	0.778327	1.98979	1.73985	0.886832	0.653784	0.562177	0.65881	0.928325	943.749	75.58	10.0649	8.71924
A0A0G2K3Z9	Uncharacterized protein OS=Rattus norvegicus OX=10116 PE=4 SV=1 - [A0A0G2K3Z9_RAT]	3	8	15	175	1.22064	1.09146	0.93347	1.03885	0.971802	0.83246	1.0005	0.803255	0.974807	0.832965	0.955127	1.07185	0.835523	0.942703	1.32362	0.912685	0.804899	0.908938	0.897852	0.906374	0.811454	1.10936	0.89669	0.93417	0.984941	1.19703	0.967116	1.04595	0.961089	1.52194	1.21652	0.889543	0.920496	0.868666	0.80845	1.02781	527.485	75.38	22.1504	8.39697
P45592	Cofilin-1 OS=Rattus norvegicus OX=10116 GN=Cfl1 PE=1 SV=3 - [COF1_RAT]	2	2	10	73	1.29248	0.884532	0.961214	1.25969	1.03401	0.751374	1.01582	0.76947	0.956493	0.691389	1.12575	1.42617	0.91155	0.908209	0.903849	1.12222	0.705627	0.804962	1.11876	0.941042	0.721805	1.00706	0.693803	1.3764	1.00632	1.23447	0.787466	1.1922	0.724096	1.63252	0.891799	0.916355	0.911526	0.846591	1.19479	1.05391	303.495	75.3	18.5207	8.08936
F1LPG5	NADH:ubiquinone oxidoreductase subunit B4 OS=Rattus norvegicus OX=10116 GN=Ndufb4 PE=1 SV=1 - [F1LPG5_RAT]	3	4	9	90	0.927354	0.756328	1.10527	0.99914	0.895905	1.06465	0.719346	1.14953	1.04105	1.10473	1.11794	1.03904	0.953078	1.05661	1.05299	1.34218	1.03072	0.837584	1.10105	1.2612	1.00955	0.773057	1.13036	2.14563	0.984136	0.921454	0.852302	0.960697	0.870361	0.694334	0.990788	1.1545	0.869307	1.2072	1.19192	0.984591	215.64	68.22	15.055	9.81787
M0R5J4	Uncharacterized protein OS=Rattus norvegicus OX=10116 PE=3 SV=1 - [M0R5J4_RAT]	2	16	29	495	0.720613	0.93168	1.04094	0.997505	0.858207	0.970423	0.868149	0.952059	0.96412	0.922874	1.09004	1.17189	0.959389	1.01894	0.927947	1.11259	1.03724	0.933591	1.02942	1.04169	0.974307	1.02054	1.06459	1.0586	0.922264	0.800141	0.986465	0.935935	1.03726	1.16194	0.856286	1.00888	0.99586	0.953684	0.837584	0.92001	2467.68	70.28	47.0452	6.3667
B5DEL8	NADH dehydrogenase (Ubiquinone) Fe-S protein 5 OS=Rattus norvegicus OX=10116 GN=Ndufs5 PE=1 SV=1 - [B5DEL8_RAT]	2	4	11	63	0.688497	0.703188	0.836019	0.837429	0.656518	1.06339	0.736881	0.997688	1.0397	1.13943	1.02202	2.00479	0.972521	1.13948	0.609753	1.37977	1.00231	0.820179	1.79669	0.981401	1.02409	0.802729	1.06878	2.0977	0.796292	0.814822	0.73972	0.68269	0.85858	1.01796	0.632728	1.30915	1.02814	1.15493	0.749678	0.878634	127.957	66.98	12.6915	8.92432
O35115	Four and a half LIM domains protein 2 OS=Rattus norvegicus OX=10116 GN=Fhl2 PE=1 SV=1 - [FHL2_RAT]	1	13	19	110	1.21293	1.34475	1.18896	1.21205	0.539184	1.01517	0.712428	0.96833	0.698054	0.757589	0.761418	1.30042	0.953726	0.939443	1.25947	0.7728	0.750503	0.964607	1.00599	0.621322	0.821892	1.335	0.662946	0.878008	0.718573	0.674496	0.954498	1.01587	0.891956	1.14055	1.27281	1.07371	1.05013	0.940357	1.0409	1.34883	323.857	65.23	32.0645	7.29834
P67779	Prohibitin OS=Rattus norvegicus OX=10116 GN=Phb PE=1 SV=1 - [PHB_RAT]	2	17	20	237	0.907946	1.02365	0.993938	1.05586	1.06501	0.958279	0.822631	0.936319	1.01633	0.989253	1.12624	1.09688	0.916512	0.96671	0.966769	1.13255	0.929566	0.897799	1.10358	1.05627	0.98836	1.10698	1.06043	1.39554	1.0021	1.18139	1.01561	1.03109	1.01443	1.05592	0.875002	0.962881	0.862714	0.958109	0.855157	0.981162	1231.62	73.9	29.8019	5.75732
P19804	Nucleoside diphosphate kinase B OS=Rattus norvegicus OX=10116 GN=Nme2 PE=1 SV=1 - [NDKB_RAT]	2	5	11	181	0.798517	1.07439	0.815901	1.21544	0.93102	1.03384	0.935501	0.884863	0.974623	1.02338	0.740824	1.23758	0.827602	0.901432	0.810169	1.2631	0.982388	0.812454	0.691859	0.889461	0.820319	1.20001	0.961143	1.15702	0.955192	1.39987	1.45229	1.05491	1.01624	1.02141	0.941227	1.02528	0.848517	0.961801	0.593545	1.20491	296.281	73.68	17.2719	7.44482
P04636	Malate dehydrogenase, mitochondrial OS=Rattus norvegicus OX=10116 GN=Mdh2 PE=1 SV=2 - [MDHM_RAT]	1	24	31	1050	0.577767	0.750135	1.11102	0.72455	0.90439	1.11125	1.04417	1.12289	1.1551	1.13923	1.10444	1.22767	1.05453	1.08895	0.770751	1.00997	1.08174	0.990929	1.09581	1.05372	1.09106	0.851757	1.16818	0.928053	0.871197	0.692937	1.06609	0.829882	1.02549	1.24347	0.918637	1.16905	0.988355	1.06717	0.831364	0.874321	5444.18	73.67	35.6608	8.67529
G3V8C3	Vimentin OS=Rattus norvegicus OX=10116 GN=Vim PE=1 SV=1 - [G3V8C3_RAT]	12	17	32	282	1.65634	0.812854	1.19322	1.23078	0.70278	0.624072	1.12987	0.733673	0.711943	0.510139	0.859094	1.22257	0.708521	0.885946	1.72138	0.968954	0.785921	0.983643	1.00069	0.865332	0.568034	0.843851	0.696909	1.17694	0.910794	0.951441	0.685762	0.992156	0.610949	2.26269	1.35647	0.919548	0.992443	0.891584	1.40737	1.07133	1247.66	61.16	53.6681	5.12256
Q62669	Beta-globin OS=Rattus norvegicus OX=10116 GN=LOC103694855 PE=1 SV=1 - [Q62669_RAT]	1	8	13	184	1.36832	0.993832	0.379703	2.22635	0.625658	2.08737	0.492919	0.667064	0.412001	0.910731	1.06518	0.911952	0.521392	0.352928	0.799913	0.914325	0.678288	0.232172	2.51115	0.691545	2.30514	0.596023	0.428765	3.69605	0.990916	0.466658	0.582777	0.926539	3.28672	1.2134	0.554727	2.20896	0.513376	0.804863	0.644018	0.874677	1179.51	73.47	16.0123	8.19189
G3V7U0	Cysteine and glycine-rich protein 3 OS=Rattus norvegicus OX=10116 GN=Csrp3 PE=1 SV=1 - [G3V7U0_RAT]	3	8	12	125	1.06043	1.05567	1.4122	0.98176	0.818546	0.953345	1.39248	0.96838	0.858992	0.715401	0.910181	1.20506	0.772855	1.06532	1.17899	0.943619	0.774859	1.08725	1.27331	0.965957	0.784259	0.913931	0.884414	1.0952	0.910723	0.931824	0.95951	1.47605	0.913643	2.25755	1.21492	1.20201	1.0616	0.83553	1.13939	1.09152	500.769	73.2	20.8479	8.54346
D3ZE15	NADH:ubiquinone oxidoreductase subunit A13 OS=Rattus norvegicus OX=10116 GN=Ndufa13 PE=1 SV=1 - [D3ZE15_RAT]	2	4	11	175	0.995788	0.992145	0.930781	0.899668	1.08689	0.959608	0.819846	1.07035	1.04279	1.11483	1.05072	0.746189	0.986844	1.06635	1.10618	1.13587	0.935929	0.926103	1.04561	1.23932	0.934384	0.978379	1.03194	1.34712	1.03782	1.13023	0.990483	0.904447	1.00179	0.735614	0.903297	0.93595	0.893071	1.07967	1.12648	1.11393	734.515	72.22	16.7657	9.48096
O35244	Peroxiredoxin-6 OS=Rattus norvegicus OX=10116 GN=Prdx6 PE=1 SV=3 - [PRDX6_RAT]	1	13	15	161	1.36242	1.07703	1.01259	1.21986	1.02614	0.785412	1.14089	0.749137	0.817117	0.712105	0.934464	1.13577	0.671427	0.895135	1.49074	1.04898	0.679133	0.995726	0.98676	0.8657	0.682199	1.07583	0.854584	1.15324	0.975451	1.28173	0.920721	1.11353	0.795543	1.42667	1.61219	1.02863	0.827607	0.719445	1.08803	1.17662	659.981	71.88	24.803	5.93506
A0A0G2JSP8	Creatine kinase M-type OS=Rattus norvegicus OX=10116 GN=Ckm PE=1 SV=1 - [A0A0G2JSP8_RAT]	2	21	39	868	1.20906	1.22904	0.849574	1.21402	0.912542	0.986738	0.991755	0.947272	0.902711	1.00472	0.787054	0.907175	0.779378	0.943962	1.19909	0.949807	0.8257	0.916367	0.736821	0.92461	0.823246	1.33748	0.929959	0.846753	1.04395	1.1171	1.05439	1.05367	1.04069	0.950151	1.12514	0.888642	0.919096	0.838446	0.851882	1.19512	2645.54	69.29	42.9918	7.06396
P09605	Creatine kinase S-type, mitochondrial OS=Rattus norvegicus OX=10116 GN=Ckmt2 PE=1 SV=2 - [KCRS_RAT]	3	13	35	1117	0.930849	1.07657	0.931581	1.58206	1.15119	0.941176	0.706957	1.07259	0.861952	0.680183	0.718778	0.843244	0.821538	0.832937	1.48125	1.24034	0.608285	0.669431	0.745835	0.624454	1.38475	1.85694	1.03964	1.31939	0.988778	1.38268	1.59755	1.19494	0.958455	0.743818	1.11641	0.674868	0.897196	0.898116	0.78423	1.27129	3059.54	65.39	47.3553	8.51416
P42123	L-lactate dehydrogenase B chain OS=Rattus norvegicus OX=10116 GN=Ldhb PE=1 SV=2 - [LDHB_RAT]	1	18	27	522	0.701885	1.09428	0.848327	0.73001	0.941161	1.29937	0.932453	1.19569	1.30433	1.25726	1.02722	0.603573	1.20412	1.1414	0.680979	0.905293	1.14459	1.09607	0.827135	1.11262	1.13054	1.18024	1.36392	0.650709	0.951852	0.722393	1.14867	0.879823	1.06707	0.530098	0.790869	1.06992	1.08766	1.25491	0.827538	1.0015	2566.14	70.96	36.5891	6.04932
A9UMV9	NADH:ubiquinone oxidoreductase subunit A7 OS=Rattus norvegicus OX=10116 GN=Ndufa7 PE=1 SV=1 - [A9UMV9_RAT]	1	6	9	113	1.11243	0.710073	1.01203	1.05084	0.769298	0.713032	0.627689	0.88075	0.758996	0.792321	0.752027	1.55798	0.833166	0.95673	1.62582	1.2381	0.794986	0.842773	1.65881	0.964516	0.77714	0.58173	0.76788	1.86941	1.07044	1.15574	0.671949	0.857915	0.827066	1.39136	1.08528	0.941639	0.80443	0.879659	1.09041	0.987317	548.743	67.86	12.4926	10.4771
P15999	ATP synthase subunit alpha, mitochondrial OS=Rattus norvegicus OX=10116 GN=Atp5f1a PE=1 SV=2 - [ATPA_RAT]	3	35	59	1320	0.616659	0.842193	1.04745	0.679587	1.06498	1.1658	0.912041	1.20602	1.15873	1.29099	1.10405	0.896268	1.13827	1.13864	0.542878	1.05732	1.17281	0.985158	0.987743	1.26552	1.22228	0.885665	1.17745	0.861311	0.924981	0.669128	1.09528	0.829317	1.10614	0.643972	0.788959	1.09573	0.991803	1.10135	0.996785	0.878269	6207.71	66.55	59.7166	9.18799
M0RAM5	Glutathione peroxidase OS=Rattus norvegicus OX=10116 GN=Gpx1 PE=1 SV=1 - [M0RAM5_RAT]	2	4	11	101	0.896327	0.891058	0.982112	0.978743	0.884011	0.860718	0.90345	0.930642	1.00464	0.808981	0.853946	1.36695	0.936119	1.0562	1.2089	0.955242	1.03791	1.04539	1.26882	1.06314	0.855341	0.961205	0.82423	1.03736	0.900689	0.852835	0.790901	0.859249	0.925997	1.64049	1.06012	1.08303	0.916072	0.917706	1.03991	0.98734	225.218	66	22.1414	7.86963
A0A0G2JXR0	LIM domain-binding 3 OS=Rattus norvegicus OX=10116 GN=Ldb3 PE=1 SV=1 - [A0A0G2JXR0_RAT]	1	4	19	155	1.07466	0.951004	1.17412	1.05325	0.894916	0.739049	1.19675	0.680444	0.779581	0.761066	1.16831	1.38867	0.627279	0.879062	1.46487	0.944237	0.720137	1.01155	1.07798	0.823726	0.625453	0.897501	0.904718	1.02628	0.855934	1.15484	0.857088	1.01831	0.919489	2.19681	1.72291	1.06661	0.738704	0.666461	1.29202	0.990443	656.948	64.24	31.408	9.18799
D3ZCV0	Actinin alpha 2 OS=Rattus norvegicus OX=10116 GN=Actn2 PE=1 SV=1 - [D3ZCV0_RAT]	1	39	76	1015	0.708376	1.09032	1.02823	0.805055	1.12721	1.69289	0.964977	1.30677	1.03948	1.34202	0.977023	0.576998	1.23993	1.28233	0.679339	0.796031	1.24008	1.04809	0.806684	0.704445	1.3188	0.904921	1.0575	0.77052	1.02643	0.707646	1.17484	0.797758	1.26376	0.545281	1.07379	1.11125	1.23516	1.16543	0.740397	0.864723	3717.03	66.11	103.768	5.45264
P07895	Superoxide dismutase [Mn], mitochondrial OS=Rattus norvegicus OX=10116 GN=Sod2 PE=1 SV=2 - [SODM_RAT]	1	6	13	227	1.08548	1.10872	1.03104	0.926115	0.995131	0.957619	1.06272	0.926438	1.01738	1.05805	0.893338	1.07564	0.885118	0.924581	1.02808	0.990316	0.931024	0.979853	1.09121	1.03592	0.919309	1.13503	1.00254	1.10856	1.00028	1.00512	0.931322	0.923523	1.06147	1.38478	1.22359	1.07968	0.8955	0.911363	0.826867	1.03248	833.281	68.92	24.6586	8.80713
B0BMW2	3-hydroxyacyl-CoA dehydrogenase type-2 OS=Rattus norvegicus OX=10116 GN=Hsd17b10 PE=1 SV=1 - [B0BMW2_RAT]	2	14	17	128	0.763352	0.94151	1.09927	0.714425	1.0854	1.24718	0.894587	1.18006	1.16585	1.22161	1.05529	0.905898	1.18073	1.14729	0.690988	1.03587	1.24846	1.05839	0.983504	1.25199	1.33736	1.01886	1.18453	0.827016	0.95662	0.716733	1.08764	0.851934	1.14843	0.770204	0.826566	1.16328	1.11094	1.19935	1.12552	0.95721	924.29	63.98	27.2325	8.5874
P11240	Cytochrome c oxidase subunit 5A, mitochondrial OS=Rattus norvegicus OX=10116 GN=Cox5a PE=1 SV=1 - [COX5A_RAT]	1	5	11	399	1.82717	0.988466	0.963346	1.40021	1.06103	0.551129	0.764168	0.50999	0.518526	0.486677	0.795678	1.32479	0.384473	0.704805	1.94056	1.04858	0.492117	0.951521	1.04886	0.657084	0.511979	0.877577	0.612194	1.60555	0.954905	1.6519	0.718737	1.31683	0.803943	1.83597	1.87936	0.758471	0.645789	0.493816	1.3839	1.08626	1035.22	65.07	16.1193	6.53662
P61983	14-3-3 protein gamma OS=Rattus norvegicus OX=10116 GN=Ywhag PE=1 SV=2 - [1433G_RAT]	3	6	15	149	0.929788	1.09368	0.903645	1.11202	0.936724	1.06018	1.04749	0.921333	0.910438	0.913906	0.962554	1.03943	0.800868	1.00722	0.781951	1.07732	0.853305	0.922382	0.872621	1.03519	0.786408	1.19389	0.901544	1.14262	0.949524	1.43542	0.995751	1.04009	0.911278	1.12393	0.890258	0.882643	0.878818	0.965636	0.728845	1.14128	404.945	64.78	28.2849	4.89404
P08010	Glutathione S-transferase Mu 2 OS=Rattus norvegicus OX=10116 GN=Gstm2 PE=1 SV=2 - [GSTM2_RAT]	10	7	18	170	1.07455	1.32386	0.80831	1.22973	0.931893	0.976088	1.00626	1.15163	0.912505	1.00541	0.713224	0.88994	0.889489	1.22173	0.672938	0.783073	1.0624	0.838367	1.01811	1.06433	1.33154	1.38741	1.09533	1.25024	1.08236	1.32164	1.02269	1.02419	1.03393	0.753604	0.683081	0.82248	0.968638	1.22762	1.0122	1.06297	757.024	57.8	25.686	7.38623
P97541	Heat shock protein beta-6 OS=Rattus norvegicus OX=10116 GN=Hspb6 PE=1 SV=1 - [HSPB6_RAT]	1	6	8	86	1.85596	1.0127	0.981051	1.22629	1.08213	0.562834	0.934877	0.709707	0.727057	0.504306	0.722658	1.12446	0.487125	0.75988	1.55631	0.987529	0.617979	0.877611	0.912739	0.887859	0.494641	0.986754	0.572349	1.31818	0.855236	1.49153	0.850505	1.21563	0.826766	1.8905	1.8617	0.934021	0.743586	0.560431	1.50015	1.07888	339.825	67.9	17.4941	6.52197
Q5XIH3	NADH dehydrogenase [ubiquinone] flavoprotein 1, mitochondrial OS=Rattus norvegicus OX=10116 GN=Ndufv1 PE=1 SV=1 - [Q5XIH3_RAT]	1	15	27	191	0.581839	0.840347	0.874122	0.649017	0.933273	1.30683	0.971947	1.37066	1.29428	1.26398	0.991221	0.672667	1.39403	1.26987	0.565459	0.972967	1.2349	1.03263	0.853467	1.01925	1.24752	0.929934	1.37974	0.684852	1.03833	0.651326	1.16993	0.786299	1.17603	0.591686	0.90012	1.16391	1.15501	1.23702	0.766909	0.922032	707.95	61.42	50.6986	8.07471
P11762	Galectin-1 OS=Rattus norvegicus OX=10116 GN=Lgals1 PE=1 SV=2 - [LEG1_RAT]	1	7	10	113	1.27258	1.05082	1.05114	1.04401	1.06111	1.03179	0.801249	0.58658	0.672155	0.876019	1.35419	1.20105	0.790697	0.951743	1.47336	0.66761	0.632454	1.0582	0.787007	0.498497	0.695737	0.733939	0.744383	1.42875	1.52152	1.46251	1.09322	1.18631	0.958261	2.69924	2.10403	1.20356	0.90374	0.68395	0.718044	0.972103	289.679	60	14.8472	5.26221
Q66HF1	NADH-ubiquinone oxidoreductase 75 kDa subunit, mitochondrial OS=Rattus norvegicus OX=10116 GN=Ndufs1 PE=1 SV=1 - [NDUS1_RAT]	1	23	42	476	0.606359	0.911824	0.928301	0.62141	0.859669	1.2668	0.940089	1.26124	1.33091	1.31093	1.04522	0.795314	1.24489	1.25845	0.688106	1.05592	1.23312	0.968088	0.958443	1.24896	1.19914	1.00522	1.31274	0.722644	0.969	0.630984	1.15591	0.845282	1.10669	0.562027	0.803731	1.11591	1.09182	1.24051	0.847877	0.952026	2344.03	54.33	79.3616	5.89697
P19234	NADH dehydrogenase [ubiquinone] flavoprotein 2, mitochondrial OS=Rattus norvegicus OX=10116 GN=Ndufv2 PE=1 SV=2 - [NDUV2_RAT]	1	7	17	253	1.57005	1.06583	0.935801	1.09439	1.0373	0.76415	0.871275	0.795062	0.737878	0.70258	0.79112	1.13569	0.632773	0.887325	1.69402	1.03654	0.648434	0.93159	0.957564	0.860063	0.662503	1.02105	0.832969	1.14661	0.944313	1.41736	0.931875	1.12795	0.886784	1.61739	1.74384	0.873759	0.849037	0.686309	1.16637	1.18398	883.877	60.08	27.3609	6.68311
P49432	Pyruvate dehydrogenase E1 component subunit beta, mitochondrial OS=Rattus norvegicus OX=10116 GN=Pdhb PE=1 SV=2 - [ODPB_RAT]	2	16	21	343	0.867444	0.965436	0.991072	0.935154	0.96666	0.993313	0.933443	0.908332	1.10604	1.02293	1.10159	1.01735	0.869857	0.997435	1.0053	1.00973	0.920637	0.842925	0.949442	0.905665	0.969245	1.26943	1.10072	0.97315	0.867863	0.894666	1.07502	1.0069	0.978923	1.10378	0.965155	0.961825	0.88503	0.916763	0.688347	0.95522	1152.1	67.13	38.957	6.65381
M0RC65	Cofilin 2 OS=Rattus norvegicus OX=10116 GN=Cfl2 PE=1 SV=1 - [M0RC65_RAT]	1	3	10	65	1.13311	0.866321	0.980409	1.31182	0.844996	0.691639	0.850393	0.560132	0.69922	0.766013	1.00725	1.40719	0.517651	0.846828	0.898655	1.08824	0.643948	0.747957	1.17719	0.815784	0.537508	0.923593	0.754143	1.34662	0.780057	1.36396	0.843296	1.15211	0.78454	1.73272	0.803572	0.946011	0.781018	0.725899	0.873457	0.952413	184.532	58.43	18.6978	7.88428
P23693	Troponin I, cardiac muscle OS=Rattus norvegicus OX=10116 GN=Tnni3 PE=1 SV=2 - [TNNI3_RAT]	1	8	20	688	1.59973	0.978352	0.880669	1.61072	1.47736	0.754203	0.684981	0.745018	0.607721	0.477841	0.861243	1.29239	0.478363	0.578631	1.64617	1.63626	0.444888	0.648941	0.802943	0.585618	1.03432	1.41434	0.654822	1.82649	0.855639	1.39507	1.24794	1.4226	0.767105	1.47682	1.90917	0.694635	0.764867	0.546454	0.99957	1.05751	2875.22	66.82	24.1447	9.5542
P04797	Glyceraldehyde-3-phosphate dehydrogenase OS=Rattus norvegicus OX=10116 GN=Gapdh PE=1 SV=3 - [G3P_RAT]	19	10	23	617	0.608056	0.811524	0.998275	0.785043	0.984983	1.23213	1.14338	1.18364	1.16057	1.13911	0.93509	1.24892	1.05238	1.07071	0.989953	1.07449	0.982645	0.89488	1.07831	0.834809	1.10269	1.01314	1.1793	0.812894	0.884724	0.742072	1.30149	0.910198	1.01254	1.31555	1.28661	1.07714	1.0949	1.01927	0.772548	0.909073	2636.51	64.86	35.8052	8.03076
P13221	Aspartate aminotransferase, cytoplasmic OS=Rattus norvegicus OX=10116 GN=Got1 PE=1 SV=3 - [AATC_RAT]	1	21	29	332	0.591613	0.924623	0.992689	0.643129	0.91183	1.19244	0.947177	1.31518	1.18325	1.28656	1.06682	0.650488	1.25064	1.16272	0.624028	0.936422	1.21064	0.980284	0.936523	1.13194	1.15445	0.955328	1.20707	0.671137	0.988954	0.629338	1.11539	0.84069	1.19964	0.538793	0.787358	1.05645	1.03872	1.17215	0.848672	0.920083	1452.54	63.68	46.3995	7.21045
A0A0G2KAQ5	Myozenin 2 OS=Rattus norvegicus OX=10116 GN=Myoz2 PE=1 SV=1 - [A0A0G2KAQ5_RAT]	2	10	21	285	1.76465	1.01322	0.998545	1.31685	1.08739	0.689805	0.837703	0.589881	0.607747	0.587	0.838353	1.19254	0.432107	0.720597	1.58989	0.970553	0.524546	0.926976	1.01841	0.730347	0.518601	0.859662	0.685483	1.37173	0.992384	1.48294	0.78951	1.27299	0.794774	1.77503	1.74926	0.810762	0.710459	0.578636	1.30375	1.03409	1069.07	59.09	29.771	7.54736
G3V8V3	Alpha-1,4 glucan phosphorylase OS=Rattus norvegicus OX=10116 GN=Pygm PE=1 SV=1 - [G3V8V3_RAT]	5	29	63	667	0.697444	0.834248	0.967069	0.634107	1.03507	1.18624	1.09005	1.23316	1.21164	1.33348	1.08991	0.572082	1.23653	1.16198	0.664285	1.02017	1.21981	1.04651	1.05554	1.2876	1.12498	0.852888	1.24508	0.771211	0.983978	0.716063	1.05277	0.877164	1.01889	0.591937	0.990308	1.04507	1.05834	1.25831	0.768007	0.961538	2309.74	58.91	97.2267	7.10791
D3ZP47	Phosphohistidine phosphatase 1 OS=Rattus norvegicus OX=10116 GN=Phpt1 PE=1 SV=1 - [D3ZP47_RAT]	1	3	8	29	1.0701	1.16586	0.931865	1.1687	0.630212	0.860068	1.15541	0.932908	0.745815	0.851637	0.912685	1.36216	0.64549	0.940877	1.33177	1.04191	0.734737	1.01437	0.684379	0.753483	0.593884	1.02955	0.785801	1.1112	0.961215	1.21235	1.00383	1.20769	0.93036	1.66095	1.43838	1.05155	0.895043	0.82941	0.84012	1.16127	144.44	65.32	14.0017	5.52881
P16290	Phosphoglycerate mutase 2 OS=Rattus norvegicus OX=10116 GN=Pgam2 PE=1 SV=2 - [PGAM2_RAT]	2	6	19	152	1.08133	1.13324	1.00481	1.19936	1.0862	0.817338	0.9185	0.907603	0.748504	1.06937	0.914558	0.902927	0.87472	0.903378	0.884666	0.991677	0.894315	0.716704	0.924882	1.19488	0.901886	1.05707	0.979985	1.34308	0.967127	1.28373	1.03269	0.984083	1.0335	0.818907	0.985879	0.912653	0.833764	0.837441	0.982194	1.14956	486.551	66.01	28.7368	8.71924
D3ZS58	NADH dehydrogenase [ubiquinone] 1 alpha subcomplex subunit 2 OS=Rattus norvegicus OX=10116 GN=Ndufa2 PE=1 SV=1 - [D3ZS58_RAT]	1	5	8	170	0.979952	0.934065	0.999244	1.28779	0.831841	0.685204	0.488051	0.792585	0.63675	0.774524	0.825261	1.71048	0.644864	0.828823	1.35804	1.65033	0.646916	0.812397	1.44597	0.888761	0.672233	0.816644	0.687859	2.43042	0.948429	1.32707	0.786662	0.889559	0.803063	1.54803	1.02632	0.878746	0.690998	0.765238	0.946518	0.945957	899.971	65.98	10.8378	9.71533
O35878	Heat shock protein beta-2 OS=Rattus norvegicus OX=10116 GN=Hspb2 PE=3 SV=1 - [HSPB2_RAT]	1	5	7	55	1.93159	0.977051	1.04845	1.32212	1.10362	0.642342	1.02605	0.683095	0.582973	0.539194	0.836874	1.33886	0.480615	0.745023	1.9363	1.29145	0.666909	0.940123	1.07205	0.761061	0.631427	0.867378	0.666847	1.44461	0.875848	1.41362	0.848834	1.28032	0.828364	2.08293	1.98109	0.911761	0.855271	0.606498	1.33075	1.13633	181.939	65.93	20.3343	5.42725
Q64428	Trifunctional enzyme subunit alpha, mitochondrial OS=Rattus norvegicus OX=10116 GN=Hadha PE=1 SV=2 - [ECHA_RAT]	1	39	60	726	0.617055	0.931386	1.11925	0.645392	0.936022	1.24643	0.920503	1.25348	1.16094	1.18568	1.06185	0.602354	1.26838	1.10528	0.533339	0.897981	1.25907	1.04429	0.913502	1.16784	1.35355	1.00272	1.204	0.75064	1.03055	0.641769	1.26214	0.925138	0.992513	0.531408	0.84065	1.11395	1.1287	1.19097	0.958201	0.877711	3351.15	65.92	82.6125	9.05615
D3ZCZ9	NADH dehydrogenase [ubiquinone] iron-sulfur protein 6, mitochondrial OS=Rattus norvegicus OX=10116 GN=LOC100912599 PE=1 SV=1 - [D3ZCZ9_RAT]	2	7	9	126	1.75226	1.08106	0.913462	1.17895	0.913003	0.688042	0.864231	0.658769	0.636056	0.608595	0.927669	1.50053	0.477618	0.901235	1.92934	1.0844	0.503628	0.993667	1.09832	0.733812	0.53583	0.859349	0.646844	1.47238	0.840046	1.30788	0.776459	1.13995	0.809336	1.88994	1.72105	0.859207	0.826887	0.567592	1.18509	1.1016	861.896	65.52	13.0317	9.21729
Q5XIH7	Prohibitin-2 OS=Rattus norvegicus OX=10116 GN=Phb2 PE=1 SV=1 - [PHB2_RAT]	2	13	17	120	1.04488	0.866703	1.01896	0.690494	1.03748	1.14287	0.873355	1.26104	1.18535	1.21561	1.10476	0.655431	1.14137	1.09538	0.671725	1.08114	1.22012	0.97736	1.0491	1.29261	1.22708	0.878623	1.30123	0.899651	0.955615	0.784193	1.18123	0.817245	1.04285	0.696467	0.864476	1.1532	1.0117	1.11503	1.09118	0.902626	759.652	60.54	33.2919	9.83252
P62804	Histone H4 OS=Rattus norvegicus OX=10116 GN=Hist1h4b PE=1 SV=2 - [H4_RAT]	1	7	12	175	0.714342	0.871478	0.768734	0.63998	0.878803	1.14027	0.887031	1.23566	1.29659	1.35233	0.755691	0.534601	1.76558	1.13201	0.597394	1.11078	1.4425	1.08645	0.862653	1.30571	1.35866	0.787394	0.96643	0.993439	1.3208	0.683538	0.934121	0.701624	0.97887	0.541263	0.861606	1.18343	1.22515	1.22355	0.812675	0.85129	609.524	65.05	11.3604	11.356
P07632	Superoxide dismutase [Cu-Zn] OS=Rattus norvegicus OX=10116 GN=Sod1 PE=1 SV=2 - [SODC_RAT]	1	8	15	220	1.6236	1.13393	0.930076	1.39589	1.02821	0.68608	0.87305	0.55332	0.771236	0.710864	1.0272	1.43455	0.503311	0.855391	1.54059	1.11069	0.577572	1.03961	1.14072	0.673782	0.614119	1.01608	0.627096	1.85118	1.01659	1.45468	0.831713	1.42385	0.828814	2.0113	1.47104	0.837276	0.788491	0.705522	1.04561	0.984967	1051.49	62.99	15.9018	6.354
Q925F0	Small muscular protein OS=Rattus norvegicus OX=10116 GN=Smpx PE=1 SV=1 - [SMPX_RAT]	1	4	7	42	1.8493	1.03972	0.733557	1.42511	1.42203	0.629717	1.08657	0.387028	0.635334	0.543752	1.31771	1.67854	0.440463	0.774977	1.99941	1.25221	0.408562	1.13048	1.5311	0.529794	0.524732	0.60971	0.596137	2.33818	0.972102	1.50235	0.688604	1.17799	0.844322	1.66582	1.7525	0.780765	0.665984	0.64333	1.47092	0.975734	134.245	64.71	9.11481	9.99365
D3ZUX5	MICOS complex subunit OS=Rattus norvegicus OX=10116 GN=Chchd3 PE=1 SV=1 - [D3ZUX5_RAT]	1	12	20	167	0.938267	0.975134	1.07531	1.34019	0.77482	0.789532	0.891084	0.664685	0.709166	0.670074	0.911687	1.29277	0.602288	0.876171	1.52963	0.933763	0.616206	0.867278	0.905915	0.682171	0.656543	0.957063	0.715434	1.27861	0.912276	1.45397	0.764843	1.14057	0.889076	1.96311	1.68008	0.93705	0.796506	0.638429	0.738873	1.05604	590.816	54.19	26.4182	8.1333
F1LXA0	NADH dehydrogenase [ubiquinone] 1 alpha subcomplex subunit 12 OS=Rattus norvegicus OX=10116 GN=Ndufa12 PE=1 SV=2 - [F1LXA0_RAT]	1	4	13	65	0.945924	0.879709	0.857076	0.832166	0.82649	1.14933	1.04673	1.24256	1.23501	1.27414	0.792356	0.79281	1.45528	1.13718	1.10805	1.03931	0.945885	0.811429	0.615466	1.2058	1.09469	0.941113	1.32215	1.08705	1.15551	1.04032	0.995086	0.893614	1.01935	0.711781	0.932499	1.0174	0.99454	1.10202	0.85249	1.06696	228.26	55.86	17.1667	9.70068
G3V913	Heat shock 27kDa protein 1 OS=Rattus norvegicus OX=10116 GN=Hspb1 PE=1 SV=1 - [G3V913_RAT]	2	5	10	121	1.82828	1.26497	0.987923	1.04968	1.13856	0.633949	1.23869	0.582779	0.665487	0.628385	0.898018	0.975433	0.649697	0.70424	1.65294	0.829194	0.758495	0.932706	0.941496	0.81142	0.687541	1.18606	0.642635	1.50403	0.818503	1.33232	0.809985	1.12929	0.759131	2.10899	1.61303	0.828501	1.05746	0.585125	1.32699	1.01919	675.256	64.08	22.7935	6.21436
Q68FU3	Electron transfer flavoprotein subunit beta OS=Rattus norvegicus OX=10116 GN=Etfb PE=1 SV=3 - [ETFB_RAT]	1	16	20	365	0.777566	0.888291	1.01381	0.990537	0.973875	0.92931	0.841244	0.954605	1.03145	1.07661	1.12251	1.1909	0.939115	0.959136	0.939823	1.12689	0.992968	0.865322	1.16826	1.00843	1.05192	0.976898	0.971534	1.23515	0.947249	1.02618	0.905523	0.975333	1.00809	1.25171	0.770426	0.99424	0.862075	0.934699	0.918485	0.969837	1500.67	62.35	27.6701	7.75244
P56741	Myosin-binding protein C, cardiac-type OS=Rattus norvegicus OX=10116 GN=Mybpc3 PE=1 SV=2 - [MYPC_RAT]	1	48	73	849	0.533883	0.927739	1.01384	0.529664	0.856157	1.47905	0.996642	1.4195	1.28954	1.53125	0.977277	0.536003	1.28461	1.28368	0.410236	0.845544	1.45763	1.17106	0.895242	1.00003	1.34983	0.754206	1.10381	0.528445	0.851798	0.349819	1.2608	0.739738	1.17581	0.473632	0.775163	1.3449	1.28728	1.43608	0.865252	0.929195	3424.47	58.4	140.674	6.53662
Q09073	ADP/ATP translocase 2 OS=Rattus norvegicus OX=10116 GN=Slc25a5 PE=1 SV=3 - [ADT2_RAT]	3	3	23	559	0.766091	0.833422	0.943349	0.563958	1.11452	1.52045	1.2091	1.29397	1.52333	1.19869	1.21962	0.665392	1.15803	1.23612	0.542648	0.997269	1.23963	1.14526	1.1082	1.29084	1.18618	0.901255	1.27621	0.843784	0.869946	0.621156	1.04865	0.817457	0.976913	0.55551	0.769259	1.11668	1.01607	1.18345	0.815789	0.859559	1467.35	57.72	32.8801	9.72998
P00507	Aspartate aminotransferase, mitochondrial OS=Rattus norvegicus OX=10116 GN=Got2 PE=1 SV=2 - [AATM_RAT]	1	22	29	526	0.659171	0.946481	1.03047	0.690642	0.993612	1.26101	0.904101	1.25179	1.10349	1.31161	0.995597	0.617292	1.1704	1.13686	0.655498	0.975848	1.18728	1.02637	0.90077	1.16119	1.37442	1.08422	1.16791	0.745945	0.959603	0.690929	1.27989	0.838383	1.0737	0.562682	0.897677	1.07046	1.08198	1.21458	0.895258	0.935077	2300.59	63.02	47.2841	8.99756
P15429	Beta-enolase OS=Rattus norvegicus OX=10116 GN=Eno3 PE=1 SV=3 - [ENOB_RAT]	2	11	27	431	0.748516	0.654245	1.03108	1.21729	0.741695	0.910168	1.03287	0.800148	0.728435	1.13099	0.935937	2.00752	0.717751	0.904285	0.848361	1.56943	1.0094	0.807912	1.18925	0.893919	0.805883	0.970849	1.38727	1.4426	0.851597	0.646891	0.996558	0.71691	1.06436	0.844804	0.962905	1.20444	0.862496	0.907091	0.939686	1.07106	2114.94	62.44	46.9843	7.44482
P56574	Isocitrate dehydrogenase [NADP], mitochondrial OS=Rattus norvegicus OX=10116 GN=Idh2 PE=1 SV=2 - [IDHP_RAT]	2	24	34	697	0.603441	0.889915	0.95392	0.645221	1.07777	1.30216	0.856327	1.45254	1.34428	1.53067	0.964163	0.695982	1.3408	1.13347	0.666488	1.01941	1.13762	0.988274	0.935312	1.00027	1.13263	1.01672	1.35442	0.715188	1.06578	0.686007	1.01809	0.758747	1.05539	0.528268	0.814393	0.931315	1.13946	1.16431	0.740163	1.06773	2607.69	62.39	50.9349	8.68994
P85834	Elongation factor Tu, mitochondrial OS=Rattus norvegicus OX=10116 GN=Tufm PE=1 SV=1 - [EFTU_RAT]	1	17	29	237	0.93497	1.0001	1.14531	0.991942	0.904691	0.943462	0.953414	0.995039	1.02092	1.05143	1.04807	1.06388	0.828914	0.915153	1.13209	0.957122	0.885116	0.895928	0.945804	1.05439	0.816967	1.06974	1.06882	0.912776	0.865651	0.858399	0.963363	0.960312	0.937023	1.28873	1.14611	1.03163	0.913443	0.914309	1.06198	1.04692	1010.5	55.97	49.491	7.56201
P36972	Adenine phosphoribosyltransferase OS=Rattus norvegicus OX=10116 GN=Aprt PE=1 SV=1 - [APT_RAT]	1	6	11	64	1.02544	1.27715	1.08526	0.798678	1.12706	1.08295	0.827331	1.22994	0.98987	1.17605	0.891811	1.00145	0.979156	0.972997	0.833624	0.9135	0.955323	1.16373	1.00939	1.03466	1.07431	1.23966	1.11512	0.81127	1.00706	0.850199	0.988605	0.707802	0.938641	0.868615	0.822439	0.982755	0.94265	1.14043	0.870401	0.992704	224.597	56.67	19.5334	6.56592
P07943	Aldose reductase OS=Rattus norvegicus OX=10116 GN=Akr1b1 PE=1 SV=3 - [ALDR_RAT]	1	9	19	190	0.8731	0.885402	1.26735	1.23348	0.861021	1.0163	0.723661	0.991293	0.861669	0.780057	1.11268	1.01847	0.840104	0.874065	1.02394	1.55214	0.947667	0.847815	1.08113	1.1716	0.95972	1.04488	1.03596	1.58377	0.734893	1.14791	1.0184	0.962215	0.742827	0.829667	0.881594	0.879474	0.910395	1.06188	0.719011	0.968828	911.617	54.11	35.7743	6.7124
P12075	Cytochrome c oxidase subunit 5B, mitochondrial OS=Rattus norvegicus OX=10116 GN=Cox5b PE=1 SV=2 - [COX5B_RAT]	1	6	11	388	1.54763	1.21359	0.884117	1.36763	1.36911	0.800483	0.752186	0.756009	0.696867	0.63953	0.736255	1.05731	0.525276	0.842643	1.66807	1.29537	0.469974	0.836956	0.874402	0.684701	1.00708	1.2551	0.733906	1.36401	0.857039	1.43789	1.09172	1.24004	0.798329	1.389	1.96917	0.667311	0.848093	0.705156	1.05717	1.09918	1399.14	62.02	13.9059	7.78174
P11951	Cytochrome c oxidase subunit 6C-2 OS=Rattus norvegicus OX=10116 GN=Cox6c2 PE=1 SV=3 - [CX6C2_RAT]	2	4	5	102	0.597745	0.786641	0.917587	0.806429	0.952198	0.989699	0.90888	0.908861	1.08986	1.0351	1.32973	1.10773	0.936358	1.05812	0.767961	1.50952	1.06276	0.885597	1.40121	1.05878	0.891712	0.793234	1.03952	1.80562	0.852778	0.914662	1.01906	1.03976	0.936127	0.599245	0.677279	1.33099	0.862973	1.02165	0.792897	0.913766	312.86	61.84	8.44945	10.0669
P47727	Carbonyl reductase [NADPH] 1 OS=Rattus norvegicus OX=10116 GN=Cbr1 PE=1 SV=2 - [CBR1_RAT]	6	10	15	47	1.11542	1.421	1.39681	1.19987	0.945343	1.00151	0.887649	1.00468	0.65411	0.807096	0.971955	1.02388	0.909235	0.963761	0.746284	0.839116	0.947666	0.931088	0.957192	0.830791	0.922353	1.02964	1.1032	0.769459	0.906432	0.894465	1.45787	1.36287	1.01621	1.36713	0.699941	1.25917	0.948212	0.929867	0.878557	1.00014	264.656	41.88	30.5589	8.06006
P15650	Long-chain specific acyl-CoA dehydrogenase, mitochondrial OS=Rattus norvegicus OX=10116 GN=Acadl PE=1 SV=1 - [ACADL_RAT]	1	21	32	459	0.602728	0.917078	1.06015	0.73363	1.04066	1.23642	0.908574	1.17449	1.25599	1.23627	1.19545	0.692126	1.05419	1.03981	0.663686	1.04003	1.03101	0.926732	0.992532	1.23074	1.07812	1.06758	1.24348	0.987106	0.943231	0.77047	1.27748	1.06748	1.00682	0.595569	0.939464	1.15708	0.946796	1.07346	0.956774	0.872445	1723.89	60	47.8424	7.73779
P12346	Serotransferrin OS=Rattus norvegicus OX=10116 GN=Tf PE=1 SV=3 - [TRFE_RAT]	3	40	60	826	1.67484	1.00831	0.70851	0.989089	0.43796	1.02919	0.484184	0.964426	1.01939	0.502085	1.22357	0.900732	0.969786	0.999588	1.17736	0.737617	1.08054	1.0337	1.35147	0.956695	1.07574	1.25203	0.838089	0.84182	1.61599	1.26141	0.821966	1.06241	0.550417	1.95262	0.445977	1.13435	1.26311	1.00779	0.855849	0.801956	3353.07	59.46	76.3456	7.28369
D4A5G8	Pyruvate dehydrogenase E1 component subunit alpha OS=Rattus norvegicus OX=10116 PE=1 SV=3 - [D4A5G8_RAT]	4	14	27	310	0.657359	0.957292	1.0743	0.724646	0.924292	1.16122	0.950477	1.15948	1.17554	1.2351	1.01379	0.95057	1.13307	1.10245	0.789235	0.894598	1.19043	0.938459	0.902561	1.05806	1.10409	1.13018	1.18578	0.69525	0.891748	0.707729	1.12856	0.790014	1.10515	0.778694	0.870665	1.00263	1.00999	1.08538	0.904441	0.995195	1185.43	61.28	43.2467	8.19189
P29117	Peptidyl-prolyl cis-trans isomerase F, mitochondrial OS=Rattus norvegicus OX=10116 GN=Ppif PE=1 SV=2 - [PPIF_RAT]	2	8	13	132	1.34044	0.814527	1.0129	1.12999	0.881231	0.770616	0.891872	0.825217	0.686629	0.785561	1.07233	1.35047	0.552182	0.90256	1.78807	1.06638	0.686443	1.04663	1.25612	0.527045	0.609835	1.11989	0.853832	1.20792	0.839681	1	0.740975	1.13394	0.801899	2.13633	1.70723	1.01357	0.689478	0.57086	0.660674	1.10294	350.25	61.17	21.7961	9.14404
G3V7J0	Aldehyde dehydrogenase family 6, subfamily A1, isoform CRA_b OS=Rattus norvegicus OX=10116 GN=Aldh6a1 PE=1 SV=1 - [G3V7J0_RAT]	2	18	31	370	0.626357	0.952879	1.03027	0.667526	0.978362	1.16637	0.998835	1.10768	1.23736	1.368	0.905222	0.898293	1.14626	1.15168	0.694708	0.869292	1.17212	0.916769	0.913075	1.11017	1.18756	1.02997	1.2474	0.700444	1.00797	0.698528	1.05847	0.762211	1.17173	0.651406	0.850936	1.00952	0.953054	1.17971	0.893745	0.945408	1422.42	55.7	57.7105	8.17725
P11232	Thioredoxin OS=Rattus norvegicus OX=10116 GN=Txn PE=1 SV=2 - [THIO_RAT]	2	7	8	74	1.617	1.20472	1.08656	1.31113	0.945989	0.869364	0.951861	0.7931	0.90622	0.677306	0.884405	1.11585	0.638609	0.898335	1.38643	1.13362	0.705379	0.966193	0.985915	0.867948	0.822715	1.29068	0.760182	1.17267	1.05741	1.25123	0.975522	1.29505	0.874575	1.68756	1.2506	0.895139	0.900196	0.803659	0.542375	1.1625	338.792	60.95	11.6657	4.91943
G3V885	Myosin-6 OS=Rattus norvegicus OX=10116 GN=Myh6 PE=1 SV=2 - [G3V885_RAT]	20	21	148	1255	0.825643	1.51769	1.08871	0.846563	0.542287	1.17567	0.622365	1.02782	0.702342	1.58836	0.549079	0.485741	1.50784	0.856179	0.756489	1.47803	0.89843	1.05999	1.12879	1.00572	1.66667	1.25202	0.74597	0.624112	0.788885	0.817778	1.32588	0.914114	0.957217	0.49421	1.351	1.24042	1.23281	1.06937	1.30172	1.49385	4382.23	54.39	223.243	5.73193
P20788	Cytochrome b-c1 complex subunit Rieske, mitochondrial OS=Rattus norvegicus OX=10116 GN=Uqcrfs1 PE=1 SV=2 - [UCRI_RAT]	1	8	14	189	1.44757	0.88774	0.988741	1.20876	1.2211	0.654829	0.936953	0.719724	0.650728	0.635811	1.14617	1.41852	0.549561	0.758104	1.47441	0.958528	0.534277	0.971968	1.14254	0.846782	0.575409	0.851548	0.88292	1.66825	0.932405	1.47124	0.958959	1.23034	0.746119	1.49588	1.21964	1.0066	0.655027	0.585598	1.17337	0.993874	717.203	60.58	29.4272	8.86572
Q561S0	NADH dehydrogenase [ubiquinone] 1 alpha subcomplex subunit 10, mitochondrial OS=Rattus norvegicus OX=10116 GN=Ndufa10 PE=1 SV=1 - [NDUAA_RAT]	2	12	19	198	0.820873	0.97596	1.00533	0.728729	0.912939	1.31025	1.00991	1.25342	1.15324	1.25609	0.885617	0.972593	1.19957	1.21891	0.888419	0.936735	1.11026	0.98132	0.864792	1.23329	1.07753	0.966437	1.27482	0.660509	0.881419	0.773884	1.10163	0.779133	1.08281	0.692349	0.955458	1.12517	1.18302	1.14797	0.831619	1.06216	824.702	60.28	40.4676	7.79639
P16617	Phosphoglycerate kinase 1 OS=Rattus norvegicus OX=10116 GN=Pgk1 PE=1 SV=2 - [PGK1_RAT]	4	16	26	315	0.659766	0.930305	1.05064	0.664578	0.900216	1.09744	0.965005	1.14445	1.09853	1.21665	0.927382	1.00973	1.15856	1.05013	0.639396	0.925829	1.2187	1.06192	1.03289	1.1801	1.05527	0.933944	1.14068	0.762519	0.947969	0.655861	1.04545	0.793114	1.09525	1.13186	0.794689	1.09093	1.05179	1.13764	0.904116	0.919489	1059.11	57.31	44.51	7.89893
B2RYS2	Cytochrome b-c1 complex subunit 7 OS=Rattus norvegicus OX=10116 GN=Uqcrb PE=1 SV=1 - [B2RYS2_RAT]	1	4	10	169	1.28394	0.991575	1.0692	1.57254	1.00276	0.589523	0.74042	0.662162	0.61741	0.644203	0.957299	1.70364	0.585317	0.776925	1.31949	1.23217	0.557598	0.88324	1.27505	0.758213	0.655066	0.805628	0.724173	2.04341	0.928077	1.5789	0.671816	1.05311	0.789709	1.61871	1.24373	0.856116	0.603875	0.578073	1.24309	1.0916	504.246	56.76	13.5499	9.30518
Q6P725	Desmin OS=Rattus norvegicus OX=10116 GN=Des PE=1 SV=1 - [Q6P725_RAT]	12	18	33	216	1.18582	1.15895	0.850259	0.985909	0.935247	0.791263	0.675967	0.961095	0.798988	0.857342	0.959515	1.20735	0.890256	1.26786	1.93665	1.10268	1.07274	1.08842	0.720333	0.799127	0.823357	1.48925	0.669061	1.0192	0.708685	0.752421	0.802313	1.00474	0.641143	1.87226	1.34251	1.10371	1.23282	0.669552	1.04006	0.994568	861.617	56.5	53.3901	5.2749
Q6PCU8	NADH dehydrogenase [ubiquinone] flavoprotein 3, mitochondrial OS=Rattus norvegicus OX=10116 GN=Ndufv3 PE=3 SV=1 - [NDUV3_RAT]	2	2	5	40	1.42104		0.927242	0.833124	0.990519		0.65905	0.630966	0.670955		0.98607	1.46741	0.551201		1.89728	0.804693	0.523048		2.04039		0.674816		0.562905	1.53545	1.0938		0.764052	0.707552	0.749171		1.48202	0.980972	0.779011		1.17787	0.706362	107.55	60.19	11.9343	9.40771
F1M7K3	Myosin light chain 7 OS=Rattus norvegicus OX=10116 GN=Myl7 PE=4 SV=2 - [F1M7K3_RAT]	2	4	7	34	3.45244	0.268778	0.459745	0.291765	0.451439	0.0834172	12.9456	0.519864	0.855429	0.115629	0.345049	0.652814	0.939817	0.202528	1.25531	0.432612	0.420899	2.09138	0.623142	0.511789	0.229521	1.34231	0.575545	0.276791	0.838551	0.504923	0.426342	1.65835	0.25293	1.44288	0.609525	0.390365	1.37046	0.201189	0.442126	0.313426	194.47	52.03	16.7201	4.41162
P09495	Tropomyosin alpha-4 chain OS=Rattus norvegicus OX=10116 GN=Tpm4 PE=1 SV=3 - [TPM4_RAT]	2	7	24	270	1.91688	0.990377	0.893467	1.31685	0.99399	0.62413	0.863725	0.602601	0.661196	0.436474	1.09668	1.30528	0.473694	0.742872	1.85026	1.10215	0.49163	0.866963	1.22098	0.730188	0.48757	0.948076	0.553343	1.47921	1.03982	1.746	0.755969	1.4015	0.787599	1.83151	1.75203	0.796313	0.819306	0.618643	1.40596	1.0508	665.665	55.24	28.4925	4.69092
Q63610	Tropomyosin alpha-3 chain OS=Rattus norvegicus OX=10116 GN=Tpm3 PE=1 SV=2 - [TPM3_RAT]	1	2	21	227	2.11682	0.889767	0.936739		0.807729	0.638833	0.800594		0.644799	0.631048	1.0164		0.605421	0.737027	1.46978		0.545746	0.984084	0.983208		0.581562	0.83178	0.778102		0.885973	1.27855	0.814838		0.761694	1.39891	1.32724		0.776221	0.685163	1.24476		539.875	46.37	28.9887	4.77979
P22062	Protein-L-isoaspartate(D-aspartate) O-methyltransferase OS=Rattus norvegicus OX=10116 GN=Pcmt1 PE=1 SV=2 - [PIMT_RAT]	2	5	10	50	1.43665	1.04564	0.961441	1.21476	0.991117	0.789533	1.04953	0.567446	0.700121	0.69531	1.00916	1.41647	0.596636	0.864078	1.33617	0.94794	0.664707	1.06691	1.16403	0.646782	0.611845	1.10891	0.709637	1.20116	0.892041	1.42453	0.748539	1.11074	0.91101	2.00904	1.65304	0.924195	0.789307	0.655739	0.924968	1.01488	167.46	54.19	24.6257	7.6792
A0A0G2JSG6	Adenylate kinase 2, mitochondrial OS=Rattus norvegicus OX=10116 GN=Ak2 PE=1 SV=1 - [A0A0G2JSG6_RAT]	2	8	11	86	0.796099	0.918688	1.07787	1.17895	1.08046	1.09775	0.82657	1.05495	0.945579	0.772876	0.99412	1.27813	0.912421	0.868878	1.01465	1.53358	0.862522	0.791635	1.19838	0.81421	1.02683	1.17684	0.874678	1.47833	0.851437	1.17837	0.947437	1.03436	0.944874	1.09786	0.881163	0.857146	1.01539	0.884349	0.811764	0.965033	364.736	59.91	25.5132	7.45947
Q9ER34	Aconitate hydratase, mitochondrial OS=Rattus norvegicus OX=10116 GN=Aco2 PE=1 SV=2 - [ACON_RAT]	1	34	54	784	0.48661	0.850208	1.13764	0.553754	0.886483	1.18163	1.07344	1.26512	1.2933	1.35864	1.11141	0.869124	1.23798	1.18899	0.653714	0.867942	1.24768	1.08036	0.979682	1.18997	1.19748	0.865776	1.26548	0.648025	0.921622	0.574763	1.09691	0.817867	1.16938	0.68639	0.858393	1.15071	1.03773	1.18979	0.96085	0.910707	3127.82	59.74	85.38	7.82568
A0A0G2K4M6	Actin, aortic smooth muscle OS=Rattus norvegicus OX=10116 GN=Acta2 PE=3 SV=1 - [A0A0G2K4M6_RAT]	6	9	27	770	0.77749	1.24497	0.912778	0.86856	0.902153	1.52539	0.888847	1.26087	1.1145	0.989392	0.770852	0.670318	1.09625	1.11931	0.911846	0.945763	0.957764	0.868359	0.640618	0.745641	1.91361	1.70895	1.06525	0.671808	0.912886	0.537768	1.78626	0.829729	1.05603	0.614625	1.16576	0.917579	1.29548	1.04962	0.685892	0.868802	3100.83	58.24	41.8977	5.38916
Q9WV97	Mitochondrial import inner membrane translocase subunit Tim9 OS=Rattus norvegicus OX=10116 GN=Timm9 PE=1 SV=3 - [TIM9_RAT]	1	2	4	28	0.936068	0.897009	0.868301	1.544	1.02359	0.857468	0.779699	0.643117	0.698165	0.731294	0.979934	1.29605	0.692948	0.717574	1.40345	1.06746	0.572269	0.800799	0.807059	0.631238	0.825498	1.00095	0.73674	1.69933	0.942549	1.26792	0.899081	1.20799	0.90063	1.40292	1.19887	0.821445	0.796631	0.674248	1.10248	0.982393	165.47	50.56	10.3691	7.21045
P04639	Apolipoprotein A-I OS=Rattus norvegicus OX=10116 GN=Apoa1 PE=1 SV=2 - [APOA1_RAT]	1	14	19	170	2.00438	1.26259	0.688359	1.31896	0.947269	0.956873	0.620757	0.637215	0.748309	0.435612	1.04372	0.894394	0.542078	0.995861	1.60818	0.860845	0.62425	0.861193	1.11535	0.698023	0.806363	0.873775	0.57092	1.42618	1.92011	2.12852	0.852572	1.29292	0.706334	1.35606	0.818085	0.753696	1.20031	0.672867	1.14997	0.901777	639.691	59.07	30.0432	5.74463
P20059	Hemopexin OS=Rattus norvegicus OX=10116 GN=Hpx PE=1 SV=3 - [HEMO_RAT]	1	12	27	356	1.95926	0.959366	0.798657	1.30561	0.486491	0.805069	0.547572	0.78841	1.04358	0.370155	1.16955	0.801462	0.60923	0.868409	1.63294	0.707937	0.773834	1.09531	1.14608	0.742601	0.693437	1.15988	0.836935	0.837465	1.89621	1.57843	0.928156	1.25313	0.456967	1.8222	0.872478	0.987722	1.11989	0.865074	0.972583	0.868768	793.463	58.91	51.3183	7.6499
P29418	ATP synthase subunit epsilon, mitochondrial OS=Rattus norvegicus OX=10116 GN=Atp5f1e PE=1 SV=2 - [ATP5E_RAT]	2	2	4	29	0.827285	0.835919	1.11371	0.769607	0.79506	0.98851	0.79141	1.14843	1.00791	1.15993	1.02908	1.336	1.15533	1.1096	0.898414	1.22053	1.07223	0.986812	1.29902	0.761674	1.05337	0.742278	1.07176	1.28992	0.972439	0.790464	0.955734	0.784122	0.953073	0.851572	0.724592	1.15353	0.938844	1.02218	0.976449	0.792892	89.2948	58.82	5.76311	10.0083
P17764	Acetyl-CoA acetyltransferase, mitochondrial OS=Rattus norvegicus OX=10116 GN=Acat1 PE=1 SV=1 - [THIL_RAT]	1	12	27	352	0.653735	0.967705	1.11552	0.738024	0.789815	1.09587	1.02511	1.05531	1.09753	1.23697	1.11158	1.16815	1.08206	1.04983	0.82632	0.888236	1.08274	1.00352	1.02343	1.07076	1.11756	1.00582	1.14862	0.766953	0.815768	0.748253	1.14277	0.872965	0.979118	1.09463	0.948059	1.21179	0.981209	1.04781	0.963217	0.949744	1573.84	52.36	44.6664	8.76318
D4A3V2	NADH dehydrogenase [ubiquinone] 1 alpha subcomplex subunit 6 OS=Rattus norvegicus OX=10116 GN=Ndufa6 PE=1 SV=1 - [D4A3V2_RAT]	1	5	7	99	0.829107	0.898463	0.794092	0.847877	0.96216	1.0004	0.570783	1.16631	1.00099	1.11862	1.05898	1.018	1.12309	1.00983	0.653836	1.47718	1.01769	0.790194	1.29721	1.31541	1.09394	0.874485	1.12122	1.97097	0.979573	0.971185	0.862206	0.842895	0.918182	0.64181	0.675025	0.955634	0.851004	1.17527	0.876155	0.905243	470.726	52.31	15.2141	10.1548
D4ADF5	Programmed cell death 5 OS=Rattus norvegicus OX=10116 GN=Pdcd5 PE=1 SV=1 - [D4ADF5_RAT]	1	2	7	23	1.67125	0.949249	0.980395		1.17201	0.499489	0.985609		0.591555	0.54125	1.0208		0.477465	0.654839	1.83858		0.545217	0.841115	1.07577		0.525583	0.816296	0.613167		0.974529	1.68053	0.791236		0.72997	1.82469	1.81772		0.765275	0.530949	1.45759		73.75	42.4	14.1953	5.68115
A0A0G2JSH9	Peroxiredoxin-2 OS=Rattus norvegicus OX=10116 GN=Prdx2 PE=1 SV=1 - [A0A0G2JSH9_RAT]	2	10	12	242	1.36112	0.993971	1.02096	1.06847	0.953096	0.866943	0.942802	0.788383	0.792533	0.841167	1.01332	1.27805	0.750741	0.89223	1.407	0.928527	0.822245	0.873462	0.98289	0.91785	0.814729	1.07037	0.853493	1.07392	1.0688	1.12993	0.922524	1.02742	1.01126	1.41569	0.989127	0.898406	0.838161	0.778479	1.15605	1.0316	922.785	58.08	21.7841	5.59229
P18163	Long-chain-fatty-acid--CoA ligase 1 OS=Rattus norvegicus OX=10116 GN=Acsl1 PE=1 SV=1 - [ACSL1_RAT]	3	26	36	288	0.612558	0.874157	1.03958	0.579599	1.06295	1.35582	0.983398	1.27166	1.28384	1.42473	1.13271	0.517065	1.2548	1.16239	0.444976	0.998453	1.31202	1.16152	1.09273	1.01758	1.34896	0.871408	1.3085	0.719077	1.03903	0.592697	1.30553	0.920306	1.03864	0.509443	0.729927	1.3374	1.1115	1.23807	0.811706	0.884055	1113.97	50.93	78.1282	6.99072
B2RYW3	NADH dehydrogenase (Ubiquinone) 1 beta subcomplex, 9 OS=Rattus norvegicus OX=10116 GN=Ndufb9 PE=1 SV=1 - [B2RYW3_RAT]	1	5	9	152	0.958535	1.02443	0.811938	0.983401	0.949909	0.933916	0.936993	0.861385	0.969351	0.89781	1.0789	0.972265	0.878305	1.04687	1.16678	0.99477	0.753456	0.945687	0.924735	0.83418	0.7541	1.1606	0.874346	1.14498	0.96755	1.47508	0.9468	1.15784	0.904109	1.1592	1.44384	0.8708	0.971401	0.846421	0.843087	1.12245	567.688	57.54	21.8778	8.07471
Q5BK63	NADH dehydrogenase [ubiquinone] 1 alpha subcomplex subunit 9, mitochondrial OS=Rattus norvegicus OX=10116 GN=Ndufa9 PE=1 SV=2 - [NDUA9_RAT]	1	12	23	212	0.638525	0.79709	0.988814	0.606554	1.00037	1.19373	0.97848	1.22985	1.41209	1.21046	1.09363	0.654731	1.28388	1.25782	0.679655	1.16569	1.1302	0.986188	1.12364	1.29843	1.13786	0.829392	1.23565	1.07325	0.960016	0.794113	1.1431	0.898438	1.09744	0.611647	0.870097	1.15612	1.12569	1.21716	0.747858	0.987984	965.351	54.91	42.5323	9.81787
P27605	Hypoxanthine-guanine phosphoribosyltransferase OS=Rattus norvegicus OX=10116 GN=Hprt1 PE=1 SV=1 - [HPRT_RAT]	2	10	13	74	1.07083	1.45639	0.677435	1.08379	0.790848	1.13844	0.924929	1.24348	1.17957	1.03028	0.822497	0.516455	1.15222	1.01996	0.893844	0.895901	1.15064	0.852172	0.621217	0.980536	1.20944	1.52	1.29243	0.638782	1.23407	1.03699	1.06612	1.00497	1.02802	0.569487	0.704708	0.885013	1.07782	1.11487	0.576614	1.19672	411.206	56.42	24.4615	6.53662
F1LP21	Translocase of inner mitochondrial membrane 8A1 OS=Rattus norvegicus OX=10116 GN=Timm8a1 PE=1 SV=3 - [F1LP21_RAT]	4	5	5	149	1.86327	1.0533	0.991167	1.52508	1.26694	0.652924	0.895665	0.654297	0.632605	0.549439	0.882433	1.19098	0.444636	0.786188	2.02656	1.15786	0.471487	1.07418	1.07275	0.568929	0.621109	0.978504	0.695795	1.63419	1.04075	1.61073	0.779053	1.35713	0.835282	1.83685	2.04615	0.754771	0.708805	0.551219	0.695744	1.10792	535.615	56.84	10.8812	5.16064
P56571	ES1 protein homolog, mitochondrial OS=Rattus norvegicus OX=10116 PE=1 SV=2 - [ES1_RAT]	1	9	17	257	0.734979	0.868468	1.13513	0.905997	0.824218	0.836766	1.01637	0.914747	0.933487	0.916578	1.17295	1.29901	0.873307	1.0033	1.04802	0.981629	0.86246	1.01197	1.20442	1.01301	0.759025	0.807757	0.923717	1.00592	0.78349	0.790796	0.941102	0.872451	0.874074	1.62995	1.20651	1.18178	0.885803	0.889956	1.11141	0.970445	980.328	56.39	28.1549	8.92432
M0R776	Mitochondrial ribosomal protein S36 OS=Rattus norvegicus OX=10116 GN=Mrps36 PE=1 SV=1 - [M0R776_RAT]	2	3	4	56	1.37412	0.756761	1.0708	1.08745	1.00837	0.682551	0.771796	0.716301	0.707347	0.741056	0.980743	1.46038	0.612684	0.851696	1.64963	1.03682	0.674143	1.07974	1.26107	0.863757	0.716481	0.741469	0.725215	1.62023	0.875296	1.26078	0.682651	1.04869	0.730507	2.09432	1.44285	0.94752	0.756381	0.746363	1.35871	0.971434	198.001	56.31	11.406	10.3452
B2RZD6	NDUFA4, mitochondrial complex-associated OS=Rattus norvegicus OX=10116 GN=Ndufa4 PE=1 SV=1 - [B2RZD6_RAT]	1	8	12	287	0.806564	0.956662	0.807273	0.871172	0.774798	1.02665	0.966441	1.02527	1.09593	1.08469	0.94261	0.657778	0.966806	1.0615	0.893238	0.985883	0.977414	0.909086	1.05358	1.11869	0.983945	0.824501	1.05824	0.927825	0.946278	1.00711	1.01712	0.958089	0.926367	0.574469	1.06574	0.987791	0.91198	1.04107	0.752856	1.03321	769.79	56.1	9.32087	9.5249
A0A0H2UHM3	Haptoglobin OS=Rattus norvegicus OX=10116 GN=Hp PE=1 SV=1 - [A0A0H2UHM3_RAT]	2	12	23	194	1.88527	0.965785	0.78422	1.41468	0.326233	0.718158	0.327124	0.814269	0.953058	0.415469	1.40567	0.738103	0.624377	0.980639	1.60421	0.863181	0.800823	0.955439	1.17504	0.981165	0.637208	1.05247	0.80865	0.959841	1.91474	1.70729	0.88784	1.28854	0.290325	1.74568	0.396743	1.24847	1.15338	0.935014	1.0395	0.810195	754.289	53.76	38.4075	6.53662
D4ADS4	Microsomal glutathione S-transferase 3 OS=Rattus norvegicus OX=10116 GN=Mgst3 PE=1 SV=1 - [D4ADS4_RAT]	1	1	4	19			1.12701	0.81094			0.751904	1.46547			1.00569	0.662461			0.623096	1.05329			1.02084	1.40867			1.04636	1.19345			1.41285	1.16007			1.12703	1.44434			1.52995	0.901658	68.5633	46.05	16.7216	9.49561
P12007	Isovaleryl-CoA dehydrogenase, mitochondrial OS=Rattus norvegicus OX=10116 GN=Ivd PE=1 SV=2 - [IVD_RAT]	1	13	17	203	0.59015	0.832707	1.08289	0.738921	0.940947	1.11145	1.09717	1.31827	1.13441	1.32493	0.991914	1.14689	1.1086	1.07189	0.795808	1.08648	1.16419	0.98185	1.05472	1.27802	1.07978	0.951441	1.20777	0.869154	0.904429	0.671719	1.00847	0.707402	1.00162	0.749256	0.876123	1.03715	0.959074	1.13115	1.0683	0.980361	786.885	48.58	46.4058	7.89893
P14668	Annexin A5 OS=Rattus norvegicus OX=10116 GN=Anxa5 PE=1 SV=3 - [ANXA5_RAT]	2	10	19	108	1.09488	1.17513	0.85449	1.1487	1.42342	0.804265	0.916478	1.12729	1.1975	0.988602	0.928618	0.693055	1.02369	0.889506	0.728188	1.31325	1.05723	0.766828	0.962096	1.36544	1.03013	1.28653	1.09438	1.35082	1.07159	1.39623	0.933161	1.11002	0.982717	0.527516	0.667946	0.802991	0.931565	0.999432	0.801829	1.10723	466.097	47.65	35.7223	5.04639
A0A0G2JXE0	Histone H2B OS=Rattus norvegicus OX=10116 GN=LOC102549061 PE=3 SV=1 - [A0A0G2JXE0_RAT]	14	6	9	232	1.15154	0.825608	1.17177	1.17346	0.611355	0.917476	0.674869	0.717072	0.699049	0.937232	0.74317	1.45763	0.932804	1.07571	1.14603	1.22387	1.01729	0.938035	1.11542	0.722318	0.958638	0.652659	0.707765	1.76418	0.894494	0.795133	0.652168	0.805984	0.875299	1.06531	0.867593	1.08384	1.10856	1.02025	1.09758	0.868636	755.246	55.56	13.9136	10.3159
P32551	Cytochrome b-c1 complex subunit 2, mitochondrial OS=Rattus norvegicus OX=10116 GN=Uqcrc2 PE=1 SV=2 - [QCR2_RAT]	1	18	26	344	0.566607	0.884462	1.01711	0.597225	0.979112	1.19727	1.00083	1.2395	1.2665	1.36311	1.13167	0.690968	1.22615	1.16176	0.56704	0.94659	1.22537	1.00267	0.962712	1.25888	1.20271	0.88632	1.35494	0.736004	0.934339	0.684596	1.211	0.852094	1.13488	0.52823	0.82572	1.10643	0.969309	1.14624	0.872557	0.925254	2129.2	51.77	48.3662	9.14404
A0A0G2JSR0	Voltage-dependent anion-selective channel protein 3 OS=Rattus norvegicus OX=10116 GN=Vdac3 PE=1 SV=1 - [A0A0G2JSR0_RAT]	2	13	19	160	0.424453	0.924776	0.838906	0.486866	0.943185	1.24707	1.14872	1.36611	1.46035	1.73436	1.02232	0.699406	1.41064	1.18699	0.420241	0.916017	1.49977	1.09883	0.873153	0.814946	1.2906	0.847272	1.27323	0.634231	0.870709	0.600019	1.14976	0.782826	1.1463	0.526629	0.784816	1.43097	1.1824	1.33054	0.56447	0.876938	679.39	55.48	30.7643	8.5874
A0A0H2UI36	Uncharacterized protein OS=Rattus norvegicus OX=10116 PE=1 SV=1 - [A0A0H2UI36_RAT]	6	2	4	40	0.753088	0.887606	0.537908	1.32138	0.940195	1.00101	0.468649	0.55233	1.15333	0.8063	0.737204	1.26127	0.992311	0.859284	1.03183	0.338492	1.67179	1.07993	0.984156	0.45086	1.11897	1.53357	0.596192	0.850776	0.699203	1.24117	0.623843	0.608064	1.49043	1.83723	0.928235	0.858275	1.42803	0.962897	0.687666	0.859653	170.017	55.41	17.0381	4.99561
P36201	Cysteine-rich protein 2 OS=Rattus norvegicus OX=10116 GN=Crip2 PE=2 SV=1 - [CRIP2_RAT]	2	2	7	65	1.22705	0.979984	0.862974	1.09505	0.959372	0.798	0.293121	0.749793	0.878269	0.813057	0.44717	1.20049	0.806899	0.96704	1.15763	0.844219	0.801667	1.08085	0.492147	0.772834	0.831174	1.09708	0.681829	1.26736	1.1132	1.23955	1.63388	0.968571	0.836589	1.59306	1.49856	1.02687	0.980784	0.807772	0.742367	0.999856	103.262	47.6	22.6811	8.63135
A0A0G2JVL6	NADH dehydrogenase [ubiquinone] 1 alpha subcomplex subunit 8 OS=Rattus norvegicus OX=10116 GN=Ndufa8 PE=1 SV=1 - [A0A0G2JVL6_RAT]	2	8	10	95	1.01547	1.0898	0.79817	1.11951	0.914149	0.767509	0.761966	0.921752	0.909962	0.876631	0.867622	1.40207	0.763206	0.899477	0.976865	1.18351	0.702349	0.881766	1.42654	0.763878	0.768962	1.04391	0.840688	1.84434	0.952156	1.44027	0.773301	0.927342	0.866916	1.39879	1.13336	0.966065	0.795145	0.779705	0.711911	1.08203	246.407	55.23	19.9521	8.29443
Q9WVK7	Hydroxyacyl-coenzyme A dehydrogenase, mitochondrial OS=Rattus norvegicus OX=10116 GN=Hadh PE=2 SV=1 - [HCDH_RAT]	1	6	21	288	0.599867	0.773553	1.52348	0.877885	0.964906	0.909484	0.711783	0.987807	1.00827	1.08017	1.04849	1.59444	1.07506	0.893824	0.652202	1.25282	1.04551	0.843384	1.31005	1.07484	1.04921	0.827634	1.18641	1.80823	0.996443	0.793046	1.02352	0.803668	0.841624	0.755086	0.660131	1.15502	0.890976	0.965727	0.898642	0.872751	712.152	52.87	34.4259	8.76318
P19511	ATP synthase F(0) complex subunit B1, mitochondrial OS=Rattus norvegicus OX=10116 GN=Atp5pb PE=1 SV=1 - [AT5F1_RAT]	1	9	21	239	0.727602	0.887226	0.881008	1.02338	1.21906	1.04985	0.903969	1.07754	1.17187	1.18423	1.21897	0.858403	1.0612	1.12704	0.695284	1.42113	1.05974	0.960498	1.17879	1.05376	0.986443	0.948856	1.01326	1.44493	0.978921	1.02146	1.09775	1.12626	1.04989	0.696913	0.895948	0.92107	0.930759	0.991642	0.823607	1.03827	430.707	49.61	28.8505	9.36377
Q6P9V7	Proteasome (Prosome, macropain) activator subunit 1 OS=Rattus norvegicus OX=10116 GN=Psme1 PE=1 SV=1 - [Q6P9V7_RAT]	3	9	14	142	1.28662	1.37258	0.775769	2.3443	0.687142	0.779135	0.457178	0.986885	0.630756	0.475816	1.02802	0.634575	0.725791	0.755351	1.89194	1.42273	0.761082	0.91703	0.57002	1.02896	0.864012	1.44354	0.758047	1.18838	0.948537	2.35417	1.15785	1.03282	0.620725	0.980008	0.734748	0.532024	0.773601	0.960037	0.739635	1.64365	604.158	55.02	28.617	5.80811
P14604	Enoyl-CoA hydratase, mitochondrial OS=Rattus norvegicus OX=10116 GN=Echs1 PE=1 SV=1 - [ECHM_RAT]	1	15	18	338	0.837139	0.916465	1.12088	1.26984	0.865885	0.838843	0.841881	0.860699	0.91857	0.844801	1.10394	1.35621	0.739485	0.942013	1.1633	1.25001	0.848754	0.847146	1.08664	0.747873	0.836913	1.15457	0.943144	1.41545	0.834028	1.12501	0.927727	1.07394	0.898259	1.45112	0.903365	0.884416	0.816281	0.800533	0.826909	1.02542	1467.41	54.48	31.4962	8.1333
G3V6H5	Mitochondrial 2-oxoglutarate/malate carrier protein OS=Rattus norvegicus OX=10116 GN=Slc25a11 PE=1 SV=1 - [G3V6H5_RAT]	2	12	16	124	0.574048	0.782742	0.915839	0.596694	1.20351	1.23673	1.0001	1.1832	1.37308	1.53397	1.12669	0.633283	1.18294	1.24238	0.499418	1.07022	1.25564	1.05462	0.871825	1.15894	1.21438	0.889172	1.31378	0.842572	0.970542	0.593405	1.2648	0.954108	1.09887	0.525629	0.67787	1.31988	1.01345	1.31815	0.798435	0.883869	625.959	47.77	34.1149	9.96436
P08932	T-kininogen 2 OS=Rattus norvegicus OX=10116 PE=1 SV=2 - [KNT2_RAT]	5	5	25	250	3.43755	1.60047	0.324024	0.856245	0.405309	0.840604	0.0750192	0.216909	1.05379	0.39315	0.493622	0.295081	0.602916	1.33697	0.683945	0.395924	0.792229	1.61385	0.496728	0.461215	0.819202	1.61502	0.339115	0.858846	3.10118	2.88558	0.403669	0.761308	0.523287	3.67113	0.345414	0.771989	1.74938	1.15932	0.458793	0.540754	1296.38	46.98	47.6734	6.354
P69897	Tubulin beta-5 chain OS=Rattus norvegicus OX=10116 GN=Tubb5 PE=1 SV=1 - [TBB5_RAT]	2	2	20	156		1.15017	0.963663	0.952594		1.16541	1.33587	1.45254		0.906119	0.891091	0.786579		0.872526	0.900492	0.975942		0.952506	0.851589	0.823603		1.23968	1.40972	0.586681		0.717388	1.52213	1.20905		0.678082	0.905829	0.808443		1.26279	1.02844	0.931343	678.024	52.25	49.639	4.89404
Q6PDU7	ATP synthase subunit g, mitochondrial OS=Rattus norvegicus OX=10116 GN=Atp5mg PE=1 SV=2 - [ATP5L_RAT]	1	4	5	85	0.905911	0.822022	1.07064	1.03883	1.46532	1.02042	0.911885	1.20195	1.03137	0.700727	1.20368	0.783032	0.894898	0.642571	0.86292	1.7259	0.590199	0.672782	0.965582	0.84046	2.155	1.09139	1.08052	1.50856	0.829369	0.87845	1.47083	0.999186	0.933862	0.658092	1.12718	0.79044	1.10624	0.866827	0.993069	0.960125	359.658	54.37	11.4261	9.5835
Q5XIF3	NADH dehydrogenase [ubiquinone] iron-sulfur protein 4, mitochondrial OS=Rattus norvegicus OX=10116 GN=Ndufs4 PE=1 SV=1 - [NDUS4_RAT]	1	6	10	69	1.03116	0.647702	0.974927	1.07175	0.873824	0.810677	0.984261	0.769866	0.896479	0.794531	1.06127	1.79839	0.675286	1.08556	1.30468	1.08788	0.651763	1.08988	1.33746	0.911533	0.583724	0.809896	0.717625	1.62275	0.793967	1.28545	0.704093	1.05248	0.750883	2.48141	1.40868	1.12514	0.759547	0.806065	1.05333	1.02139	286.1	53.71	19.7282	10.1401
F1LNF1	Heterogeneous nuclear ribonucleoproteins A2/B1 OS=Rattus norvegicus OX=10116 GN=Hnrnpa2b1 PE=1 SV=1 - [F1LNF1_RAT]	3	9	17	93	1.4755	0.950861	0.85837	1.0017	0.854157	0.818356	1.17019	0.659766	0.711984	0.766835	0.857202	1.4812	0.713189	0.89456	1.15722	0.737535	0.778799	1.04953	0.586684	0.735123	0.695844	1.17022	0.662279	0.934268	0.838691	1.14467	0.879309	1.11182	0.936259	2.35337	1.65239	0.923761	0.961102	0.739916	0.664033	0.967552	258.77	46.88	37.2747	9.0708
P35745	Acylphosphatase-2 OS=Rattus norvegicus OX=10116 GN=Acyp2 PE=1 SV=2 - [ACYP2_RAT]	2	3	7	42	0.917026	0.850616	0.960364	1.30447	0.714862	0.726606	0.934824	0.633571	0.866131	0.882881	1.1193	1.37746	0.639841	0.922284	1.32527	1.23337	0.696907	0.805776	1.44092	0.554511	0.694042	1.04954	0.814937	1.37834	0.811653	1.14162	0.628038	1.13255	0.833178	2.05853	1.61753	0.966574	0.740255	0.65672	0.717171	0.953609	103.678	53.61	10.8565	9.26123
Q5M9H2	Acyl-Coenzyme A dehydrogenase, very long chain OS=Rattus norvegicus OX=10116 GN=Acadvl PE=1 SV=1 - [Q5M9H2_RAT]	2	20	32	321	0.656261	0.918827	1.08906	0.657366	1.01178	1.20874	0.995566	1.3113	1.21313	1.28901	1.13082	0.65793	1.32235	1.11947	0.605802	0.884191	1.20327	1.09728	0.974883	1.34931	1.24985	0.944452	1.22013	0.706085	0.976655	0.619545	1.31894	0.895953	1.08733	0.517019	0.917913	1.16271	1.1203	1.20964	1.13124	0.950572	1604.4	46.26	70.7767	8.80713
Q920L2	Succinate dehydrogenase [ubiquinone] flavoprotein subunit, mitochondrial OS=Rattus norvegicus OX=10116 GN=Sdha PE=1 SV=1 - [SDHA_RAT]	1	17	30	432	0.56092	0.856073	0.995734	0.569663	0.957671	1.2669	1.11632	1.33012	1.2931	1.47143	1.11187	0.800867	1.3211	1.30913	0.536621	0.89023	1.32983	1.04659	0.94689	1.20105	1.22003	0.857228	1.36727	0.62329	0.930286	0.539785	1.1319	0.78089	1.20435	0.56521	0.746564	1.23506	1.10769	1.25319	0.947355	0.919921	2370.65	49.09	71.5697	7.1665
B0BNE6	NADH dehydrogenase (Ubiquinone) Fe-S protein 8 (Predicted), isoform CRA_a OS=Rattus norvegicus OX=10116 GN=Ndufs8 PE=1 SV=1 - [B0BNE6_RAT]	1	9	14	242	1.60692	1.13781	0.771833	1.43074	1.39842	0.962656	0.748086	1.05536	0.844343	0.6682	0.777029	0.947294	0.681337	0.732501	1.50863	1.46389	0.603258	0.7542	0.807954	0.772852	1.15818	1.60333	0.905101	1.31135	1.14718	1.737	1.3189	1.20316	0.980581	0.930422	1.55112	0.680967	0.932263	0.732449	0.781531	1.23104	612.011	48.11	23.9547	6.21436
P81155	Voltage-dependent anion-selective channel protein 2 OS=Rattus norvegicus OX=10116 GN=Vdac2 PE=1 SV=2 - [VDAC2_RAT]	1	10	14	192	0.549562	0.79796	1.03711	0.599389	0.859105	1.22135	1.07765	1.18445	1.19511	1.34672	1.00346	1.07356	1.23104	1.19201	0.650498	0.765059	1.25254	0.963233	0.860188	1.02655	1.14953	0.82804	1.23697	0.61704	0.845689	0.579856	1.00305	0.696659	1.11347	0.845726	0.837465	1.11331	1.0786	1.07964	0.8988	0.871206	836.117	45.42	31.7256	7.48877
P52944	PDZ and LIM domain protein 1 OS=Rattus norvegicus OX=10116 GN=Pdlim1 PE=1 SV=4 - [PDLI1_RAT]	1	5	11	41	1.38603	1.04976	1.03808	1.06242	0.999972	0.818109	1.11722	0.706678	0.72537	0.848394	0.842929	1.26614	0.606891	0.960931	1.82554	0.89931	0.636274	1.05585	1.05058	0.79879	0.683661	0.996595	0.808647	0.985647	1.06794	1.40219	0.962272	1.20592	1.0143	1.71626	1.63921	0.974885	0.864428	0.833053	1.32901	1.08009	142.329	40.37	35.5618	7.23975
A0A0G2JSV0	N-myc downstream regulated gene 2, isoform CRA_a OS=Rattus norvegicus OX=10116 GN=Ndrg2 PE=1 SV=1 - [A0A0G2JSV0_RAT]	3	2	10	44	1.05526	1.16106	0.701563	0.927639	1.12587	0.98621	1.03322	1.1106	1.22001	1.12191	0.729855	0.859033	1.071	1.01246	0.827337	0.874336	0.958896	0.949593	0.68115	1.10758	1.08671	1.21893	0.92821	0.651499	1.08025	0.941892	1.05259	1.01303	1.15819	0.587299	0.927347	0.894541	1.01874	0.854977	0.54696	1.12563	118.443	38.54	40.7381	5.30029
P07335	Creatine kinase B-type OS=Rattus norvegicus OX=10116 GN=Ckb PE=1 SV=2 - [KCRB_RAT]	1	8	16	172	1.33877	1.24137	0.768886	1.32341	0.791099	1.27998	0.94657	1.2551	1.32473	0.741599	1.05406	0.811247	0.684822	0.848909	1.63787	1.06511	0.709984	0.818864	1.00581	0.79269	0.78652	1.25171	1.31486	1.0434	0.838035	1.13294	0.933231	0.911098	0.968873	0.927194	0.915377	0.879972	0.998875	0.908572	0.814818	1.72128	768.688	50.39	42.6983	5.66846
G3V8V6	O-acetyl-ADP-ribose deacetylase MACROD1 OS=Rattus norvegicus OX=10116 GN=Macrod1 PE=1 SV=3 - [G3V8V6_RAT]	3	6	10	89	0.724576	0.906883	1.11121	1.13206	1.09743	0.975476	0.886719	0.912609	0.862517	1.17889	1.14564	1.05601	1.02469	0.938549	0.839039	1.25194	0.937208	0.944444	1.13831	0.904851	0.9581	1.15291	0.969818	1.34574	1.01681	1.26997	1.01606	1.04342	1.0038	0.776145	0.938826	1.03155	0.877947	0.992596	1.01731	1.04371	453.34	51.85	27.0611	8.08936
Q6P6R2	Dihydrolipoyl dehydrogenase, mitochondrial OS=Rattus norvegicus OX=10116 GN=Dld PE=1 SV=1 - [DLDH_RAT]	1	11	23	268	0.749096	0.959652	1.10724	0.766445	0.995652	1.1376	0.99007	1.25562	1.25396	1.22174	1.16188	0.942562	1.10016	1.07959	0.810141	0.976298	1.17817	0.93986	0.985504	1.2826	1.0916	0.961295	1.24556	0.734406	0.895492	0.703808	1.11975	0.853585	1.03067	0.900695	0.794968	1.12798	1.03103	1.07934	1.16937	0.984862	850.085	51.28	54.0041	7.86963
F1LN88	Aldehyde dehydrogenase, mitochondrial OS=Rattus norvegicus OX=10116 GN=Aldh2 PE=1 SV=2 - [F1LN88_RAT]	8	13	26	266	0.678779	1.0631	1.09928	0.770234	0.842299	1.04944	0.941617	1.3558	1.17452	1.28765	0.914769	0.900262	1.18742	1.10797	0.820636	0.954607	1.20889	0.971741	0.908111	1.19699	1.14997	1.02077	1.14176	0.694867	0.969998	0.661071	1.00322	0.79743	1.14162	0.566857	0.830328	1.04144	0.975811	1.14306	1.00761	1.12233	924.879	48.55	56.4807	7.32764
Q5RK08	Glioblastoma amplified sequence OS=Rattus norvegicus OX=10116 GN=Nipsnap2 PE=1 SV=1 - [Q5RK08_RAT]	1	10	15	157	0.646289	0.867837	1.03863	0.663253	1.0356	1.05379	1.04834	1.10627	1.14129	1.34767	1.08268	0.745325	1.20352	1.09495	0.627582	0.970746	1.16304	0.946464	1.03035	1.26824	1.21116	0.905571	1.15031	0.865169	0.975506	0.714363	1.05078	0.796633	1.06989	0.557252	0.880782	1.10109	1.02377	1.12946	1.06256	0.857165	455.961	48.4	32.9209	9.36377
Q07936	Annexin A2 OS=Rattus norvegicus OX=10116 GN=Anxa2 PE=1 SV=2 - [ANXA2_RAT]	1	11	16	108	0.868588	0.93244	0.90608	0.979185	0.93245	0.940837	0.998055	1.06464	1.17599	0.870829	1.08497	0.785539	1.18409	0.945757	0.800851	1.1864	1.14183	0.869261	0.912635	1.08518	1.03926	1.07782	1.1432	1.15908	1.12929	1.04209	0.954181	0.95171	0.876847	0.618715	0.70585	0.931321	1.08807	1.18866	0.831099	1.00446	518.811	50.15	38.6538	7.69385
Q6P7Q4	Lactoylglutathione lyase OS=Rattus norvegicus OX=10116 GN=Glo1 PE=1 SV=3 - [LGUL_RAT]	1	5	10	71	1.47099	1.20811	0.882964	1.24727	0.910125	0.786027	1.16188	0.780274	0.769907	0.806646	0.916602	0.995399	0.632638	0.720469	1.35871	0.879413	0.709732	0.92026	0.939066	0.831037	0.882161	1.03353	0.921663	0.862594	1.06313	1.35212	0.896106	1.10914	0.899158	1.51838	1.72942	0.930853	0.882259	0.735728	0.837072	1.03201	289.556	48.37	20.8063	5.31299
D4AB01	Histidine triad nucleotide binding protein 2 (Predicted), isoform CRA_a OS=Rattus norvegicus OX=10116 GN=Hint2 PE=1 SV=1 - [D4AB01_RAT]	1	6	8	45	1.7715	1.01348	1.13218	1.19833	1.05021	0.885509	1.04111	0.796619	0.793052	0.756389	0.950477	1.19594	0.814424	0.805043	1.41678	0.995411	0.839983	1.07437	1.17443	0.921698	0.775016	0.939992	0.769354	1.21509	0.985305	1.13599	0.872013	0.886601	0.954884	1.79764	1.82958	0.962143	0.91774	0.790168	1.29367	1.00937	296.875	44.79	17.3693	9.42236
B5DFG4	Heat shock 27kD protein family, member 7 (Cardiovascular) OS=Rattus norvegicus OX=10116 GN=Hspb7 PE=2 SV=1 - [B5DFG4_RAT]	1	1	6	28		1.00747	0.994614	1.40637		0.987502	0.864158	0.852468		0.71092	0.549907	1.03712		0.865723	1.85438	1.57561		0.801292	1.99395	0.643186		1.41025	0.686758	1.66589		1.12076	1.56502	1.35909		1.28083	1.77166	0.685033		0.81539	0.97735	0.988931	73.13	50.3	18.607	6.41748
B0K020	CDGSH iron-sulfur domain-containing protein 1 OS=Rattus norvegicus OX=10116 GN=Cisd1 PE=3 SV=1 - [CISD1_RAT]	1	2	5	26	0.813307	0.917838	0.909653	1.06258	1.256	1.00457	0.906319	0.86747	1.20111	1.07949	1.03156	0.916796	0.993302	1.02502	0.929769	1.48668	1.0196	0.847966	1.21002	0.920221	1.11806	0.963633	0.893858	1.58806	0.997876	1.20947	0.857488	1.01168	1.02052	0.825857	0.952388	0.949437	0.948228	0.982918	0.758153	0.807218	112.425	51.85	12.0891	8.83643
Q641Y2	NADH dehydrogenase [ubiquinone] iron-sulfur protein 2, mitochondrial OS=Rattus norvegicus OX=10116 GN=Ndufs2 PE=1 SV=1 - [NDUS2_RAT]	1	8	21	118	0.843775	0.903603	0.906252	0.645137	1.04702	1.17738	0.858371	1.33647	1.30958	1.17892	1.01646	0.61952	1.12354	1.17683	0.682926	1.11427	1.10921	0.893343	1.06769	0.842662	1.17651	1.02962	1.32112	0.780334	0.981556	0.802322	1.14138	0.862359	1.09968	0.470931	0.912364	1.08007	1.10237	1.17236	0.553694	0.980149	353.604	39.74	52.5276	6.99072
A0A0G2K8Q8	Ubiquinol-cytochrome c reductase, complex III subunit X OS=Rattus norvegicus OX=10116 GN=Uqcr10 PE=1 SV=1 - [A0A0G2K8Q8_RAT]	1	2	3	32	0.36832	0.751631	0.81503	0.861323	0.714551	1.09608	1.24633	1.05534	1.44872	1.23806	1.82791	0.927138	1.15843	1.21306	0.607349	1.31851	1.06302	0.983817	1.4392	1.03584	1.0791	0.829992	1.13128	1.9029	1.0044	1.13607	1.3311	1.31592	1.10601	0.709692	0.702114	1.33742	1.01225	1.08201	0.678882	0.993499	160.415	51.61	7.09463	8.49951
Q6PDW1	40S ribosomal protein S12 OS=Rattus norvegicus OX=10116 GN=Rps12 PE=1 SV=1 - [Q6PDW1_RAT]	5	5	8	52	1.79963	1.25671	1.10695	1.30898	1.01519	0.839133	1.03491	0.769701	0.807869	0.817853	0.979683	1.18398	0.693393	0.942922	1.43619	1.02196	0.743492	1.13775	1.1159	0.643734	0.726877	1.12251	0.771846	1.24878	1.05068	1.30626	0.919322	1.20224	0.93268	1.89108	1.55671	0.902329	0.894342	0.783669	0.865754	1.09431	242.879	51.52	14.5055	7.21045
Q5XIF6	Tubulin alpha-4A chain OS=Rattus norvegicus OX=10116 GN=Tuba4a PE=1 SV=1 - [TBA4A_RAT]	2	6	20	199	0.818336	1.04256	1.03411	0.750134	0.938759	1.07863	0.965378	1.303	1.16893	1.22386	0.957447	0.711506	1.0492	1.00106	0.69514	0.91902	1.17793	0.994862	0.894568	1.19457	1.16014	0.968103	1.10584	0.592952	1.00732	0.567552	1.05462	0.840725	1.03899	0.476345	0.856103	0.991779	1.04894	1.08234	0.85692	1.018	831.107	42.19	49.8924	5.05908
O88989	Malate dehydrogenase, cytoplasmic OS=Rattus norvegicus OX=10116 GN=Mdh1 PE=1 SV=3 - [MDHC_RAT]	1	12	21	292	0.661254	0.942011	0.982592	0.922208	0.964483	1.06826	0.915301	1.03982	1.14092	1.24765	1.09148	0.88334	1.00193	1.09128	0.795576	1.1648	1.15904	0.859826	0.980496	0.895908	1.06022	1.17052	1.158	1.07471	0.988407	0.888293	1.10011	0.964289	1.075	0.685643	0.75531	0.910633	0.929885	1.14111	0.675824	0.881914	1011.79	51.2	36.46	6.58057
P85972	Vinculin OS=Rattus norvegicus OX=10116 GN=Vcl PE=1 SV=1 - [VINC_RAT]	3	28	53	387	1.03031	1.00382	0.918669	1.03364	1.20001	0.983865	1.05683	1.02275	0.915979	1.00016	1.01093	0.851651	0.962406	1.00219	1	1.06998	0.99209	0.947635	0.994658	1.03625	0.982612	0.980183	0.998469	1.06067	1.03266	1.17557	1.03071	1.11037	1.08308	0.870614	0.995769	0.967313	1.00613	0.947856	0.934885	1.0426	1448.44	43.9	116.542	6.0874
A0A0G2K6J5	Myosin light polypeptide 6 OS=Rattus norvegicus OX=10116 GN=Myl6 PE=1 SV=1 - [A0A0G2K6J5_RAT]	5	2	6	55	2.30067	1.27999	0.826107		1.10993	0.570314	1.3609		0.663206	0.290009	0.908022		0.640875	0.295304	1.61291		0.640973	0.466282	1.43869		1.33363	2.72669	0.71613		0.79567	1.96953	1.08018		0.760472	0.954797	1.31508		1.15725	0.605996	1.46399		179.187	50.99	16.9501	4.55127
D3ZG43	NADH dehydrogenase (Ubiquinone) Fe-S protein 3 (Predicted), isoform CRA_c OS=Rattus norvegicus OX=10116 GN=Ndufs3 PE=1 SV=1 - [D3ZG43_RAT]	1	12	20	265	0.905368	1.04925	0.816655	0.910263	1.07992	1.07214	0.844372	1.13626	1.1418	1.0604	1.10815	0.893796	1.02758	1.105	0.946824	1.05718	0.947881	0.893982	0.921791	1.15803	0.996921	1.09222	1.10751	1.23619	1.03469	1.26784	1.09556	1.03781	0.986394	0.708064	0.98918	0.951526	0.955428	1.01618	0.79502	1.08158	1232.38	48.11	30.2076	7.53271
P97532	3-mercaptopyruvate sulfurtransferase OS=Rattus norvegicus OX=10116 GN=Mpst PE=1 SV=3 - [THTM_RAT]	1	8	12	58	1.13093	0.980611	0.996641	0.82768	1.13595	1.00356	1.15245	1.20191	1.00767	1.21241	0.956383	0.987244	1.07312	1.05918	0.997347	0.862498	1.05143	1.03628	0.987033	1.04998	1.02705	0.948518	1.06377	0.822237	1.08444	0.867089	0.947708	0.942451	1.13754	1.01172	1.24543	1.10308	1.08815	0.941383	1.08537	0.933352	273.985	38.72	32.9194	6.31592
P01048	T-kininogen 1 OS=Rattus norvegicus OX=10116 GN=Map1 PE=1 SV=2 - [KNT1_RAT]	1	7	23	228	3.15206	1.53334	0.418709	1.12122	0.514881	0.94307	0.120371	0.253637	1.11022	0.590885	0.567635	0.313997	0.687914	1.1923	0.759864	0.418417	0.902754	1.46838	0.5983	0.275672	0.985704	1.66929	0.574596	0.605597	3.03655	2.35673	0.724899	0.773997	0.623147	1.95181	0.460939	0.704293	1.68759	1.07892	0.443114	0.554409	1132.25	44.42	47.7446	6.52197
P55053	Fatty acid-binding protein 5 OS=Rattus norvegicus OX=10116 GN=Fabp5 PE=1 SV=3 - [FABP5_RAT]	1	3	6	19	1.04745	1.15659	0.751617	1.00616	0.74891	0.792485	1.41082	1.00756	0.919399	0.877668	1.3343	1.22412	0.981751	0.919969	1.33165	1.10959	0.723931	0.786947	1.21078	0.878985	0.708961	1.03118	0.732418	1.3886	1.01961	1.50801	0.998677	1.12862	0.93248	2.09417	0.888305	1.1353	0.882658	1.03202	0.724885	1.08025	97.95	50.37	15.0495	7.18115
Q9WUS0	Adenylate kinase 4, mitochondrial OS=Rattus norvegicus OX=10116 GN=Ak4 PE=2 SV=1 - [KAD4_RAT]	1	3	10	42	1.13387	1.26085	1.14224	1.0411	1.05521	1.07041	1.01969	0.909841	1.07056	1.19523	1.0506	1.31045	0.932275	0.985303	1.22263	0.952117	0.948672	1.07416	1.36383	0.975181	0.882625	1.12641	0.898854	1.43303	1.23175	1.18087	0.87267	0.898476	0.967711	1.39133	1.17314	1.08577	0.937097	0.996029	1.17404	0.99168	184.065	34.08	25.1873	8.01611
P10888	Cytochrome c oxidase subunit 4 isoform 1, mitochondrial OS=Rattus norvegicus OX=10116 GN=Cox4i1 PE=1 SV=1 - [COX41_RAT]	1	9	14	225	0.712829	0.9247	0.927718	1.02839	1.03996	0.992497	0.809692	0.988442	0.966621	1.00137	0.967317	0.82147	0.94058	1.00288	0.842705	1.24551	0.970094	0.901732	1.035	1.05715	1.01787	1.05696	1.00539	1.38306	0.914204	1.05216	0.977004	0.983134	0.973204	0.725504	0.848737	0.884433	0.907545	0.975102	0.95639	1.00752	751.492	48.52	19.5021	9.43701
P68370	Tubulin alpha-1A chain OS=Rattus norvegicus OX=10116 GN=Tuba1a PE=1 SV=1 - [TBA1A_RAT]	3	5	18	166	1.24807		1.05375	0.775722	1.29731		0.975125	1.56258	1.43341		1.0578	0.799699	1.80918		1.17139	0.980989	1.90993		1.01145	1.69925	1.54393		1.3044	0.71633	1.42827		1.01597	1.10578	1.39231		1.23117	1.37294	1.63379		1.15377	1.14512	588.609	43.9	50.1036	5.05908
P25113	Phosphoglycerate mutase 1 OS=Rattus norvegicus OX=10116 GN=Pgam1 PE=1 SV=4 - [PGAM1_RAT]	2	4	11	89	1.28216	1.05247	0.997984	1.16782	0.951201	0.836044	1.02272	0.872997	0.824151	0.926189	0.883631	0.997642	0.759037	0.948153	0.869508	1.08711	0.846496	0.948478	0.92428	0.854027	0.870383	1.11977	0.966079	1.53304	1.17191	1.36921	0.850292	0.996791	0.860587	1.04707	0.764676	0.856799	0.815461	1.06526	0.904195	1.04679	374.76	46.46	28.8139	7.18115
M0RAK2	RCG22622 OS=Rattus norvegicus OX=10116 GN=LOC684270 PE=1 SV=2 - [M0RAK2_RAT]	1	3	5	23	0.535527			1.42574	0.990616			1.35944	1.03358			1.42008	0.83188			1.30215	1.0334			1.72605	1.0691			1.53684	0.844832			1.31889	0.830566			1.26496	0.798492			1.24394	87.905	48.8	22.9143	8.85107
P53534	Glycogen phosphorylase, brain form (Fragment) OS=Rattus norvegicus OX=10116 GN=Pygb PE=1 SV=3 - [PYGB_RAT]	2	14	37	392	0.598459	0.86324	0.982122	0.515306	0.927478	1.05767	1.01677	1.10735	1.31213	1.47286	1.22169	0.598478	1.46008	1.1267	0.561499	0.963489	1.36426	1.02616	1.04957	1.33927	1.22072	0.790845	1.22631	0.710065	1.02873	0.588252	1.02383	0.900205	1.06636	0.443354	0.940145	1.08559	1.29018	1.22721	0.940237	0.871801	1477.23	36.28	96.1131	6.68311
A0A0G2JY31	Alpha-1-antiproteinase OS=Rattus norvegicus OX=10116 GN=Serpina1 PE=1 SV=1 - [A0A0G2JY31_RAT]	3	8	16	104	2.053	1.08416	0.812125	1.19752	0.821703	0.753193	0.869665	0.970411	0.832342	0.619987	0.857902	0.89797	0.698901	0.814645	1.55467	0.716168	0.831317	0.881493	0.796234	0.845632	0.863521	0.959278	0.992714	0.722943	2.21908	1.20054	0.841082	0.882665	0.741961	0.891443	0.940953	0.721149	1.22732	0.872708	1.06463	0.862891	401.47	31.87	46.0925	6.07471
P85108	Tubulin beta-2A chain OS=Rattus norvegicus OX=10116 GN=Tubb2a PE=1 SV=1 - [TBB2A_RAT]	3	2	17	146		1.19392	0.885629	0.75413		0.974627	1.4355	1.20032		1.11183	0.814323	0.812579		1.07553	0.873465	0.777406		1.07744	0.805439	1.16855		1.02999	1.07485	0.503105		0.754674	1.06889	0.84886		0.73543	0.799693	1.16983		1.28746	1.01346	1.0219	503.829	46.07	49.875	4.89404
D3ZXP3	Histone H2A OS=Rattus norvegicus OX=10116 GN=H2afx PE=1 SV=1 - [D3ZXP3_RAT]	6	2	6	26	1.08709	1.5751	1.13802		0.810285	1.00386	0.938273		1.56117	1.26465	1.0815		1.48466	1.23452	1.29278		0.928203		0.864948		0.891598	1.42364	0.912883		1.50517	0.842057	1.09072		1.0952	1.67837	1.51485		1.04817	1.2222	1.49578		105.706	38.46	15.1054	10.7407
A0A0G2JWS2	Nebulette OS=Rattus norvegicus OX=10116 GN=Nebl PE=1 SV=1 - [A0A0G2JWS2_RAT]	2	26	46	295	1.02478	0.962953	1.17901	1.17083	0.916348	0.790619	0.94621	0.742334	0.758395	0.770635	0.914144	1.23418	0.692357	0.889118	1.51535	1.00837	0.745437	0.899914	0.930094	0.744412	0.744859	0.952407	0.790938	1.1483	0.874153	1.11311	0.894319	1.15901	0.946663	1.51506	1.50395	0.933988	0.884089	0.702112	1.12262	1.07943	1298.53	38.24	108.886	7.34229
P62260	14-3-3 protein epsilon OS=Rattus norvegicus OX=10116 GN=Ywhae PE=1 SV=1 - [1433E_RAT]	1	4	13	72	1.04797	0.898596	0.813919	1.28641	0.995853	0.733909	1.02755	0.891931	1.07508	0.73192	1.06031	1.0603	0.950823	0.723599	0.853907	1.17772	0.900425	0.789632	0.886449	0.937113	0.928566	0.923036	0.981199	1.3451	1.07063	1.21232	1.07697	1.21604	0.995353	0.985553	0.87921	0.868778	1.02613	0.667081	0.584395	1.04138	210.51	47.84	29.1554	4.7417
P62859	40S ribosomal protein S28 OS=Rattus norvegicus OX=10116 GN=Rps28 PE=1 SV=1 - [RS28_RAT]	2	3	6	13	1.04399	0.832665	0.986987		0.865339	0.748773	1.05142		0.663344	0.707675	1.03835		0.577277	0.930104	1.62362		0.683196	1.11408	1.1838		0.422253	1.03052	0.706094		0.736796	1.5576	0.726163		0.914933	2.16319	1.62323		0.705592	0.718493	1.04395		54.89	47.83	7.8362	10.6968
G3V7C6	Tubulin beta chain OS=Rattus norvegicus OX=10116 GN=Tubb4b PE=1 SV=2 - [G3V7C6_RAT]	4	2	20	201	0.581893	1.05931	1.00155	0.779855	0.696675	0.952701	1.11981	1.16289	1.17243	1.17036	0.918225	0.755268	1.10957	1.07098	0.835383	0.769125	1.02873	0.951849	0.49189	1.12936	1.05754	1.03852	1.08977	0.632447	1.04264	0.698953	1.04167	0.893713	0.988911	0.592257	1.10643	0.866438	1.08025	1.05001	0.852257	1.05092	910.592	45.99	61.1475	4.85596
Q6IRH6	Phosphate carrier protein, mitochondrial OS=Rattus norvegicus OX=10116 GN=Slc25a3 PE=1 SV=1 - [Q6IRH6_RAT]	3	11	18	235	0.452279	0.872334	0.867025	0.523277	0.927637	1.26846	1.1163	1.30851	1.39222	1.44129	1.05863	0.484561	1.31878	1.17654	0.532761	0.895548	1.26525	1.05989	0.898012	0.915662	1.12774	0.850308	1.38555	0.546137	0.965314	0.60695	1.13636	0.832431	1.13317	0.467509	0.801996	1.09873	1.0545	1.18772	0.600093	0.897939	660.59	47.62	39.5955	9.29053
P05545	Serine protease inhibitor A3K OS=Rattus norvegicus OX=10116 GN=Serpina3k PE=1 SV=3 - [SPA3K_RAT]	2	7	14	105	1.69301	1.12466	0.957088	1.244	0.879137	1.03951	1.04171	0.836544	0.76595	0.640802	0.931964	1.42852	0.597326	0.855123	1.59179	0.743254	0.885709	1.10234	1.06491	0.950502	0.821171	0.933688	0.864916	0.904926	1.1156	0.849843	0.749393	1.0381	1.06376	1.52271	1.35122	1.02497	1.10194	0.688535	0.9792	0.821118	406.073	47.6	46.5321	5.43994
G3V8B0	Myosin-7 OS=Rattus norvegicus OX=10116 GN=Myh7 PE=1 SV=1 - [G3V8B0_RAT]	20	6	111	886	0.840693	1.07682	1.37546	1.14696	0.357412	0.81482	0.712813	0.835523	0.799469	1.14653	0.594199	0.600035	1.36342	0.897266	0.698806	1.30902	1.15238	0.738628	0.842319	1.1034	1.30077	0.847526	1.03404	0.607202	0.720885	0.674993	1.81846	1.13381	0.78943	0.422382	1.2573	1.31888	1.61757	1.0204	1.06501	1.19746	2931.65	41.96	222.762	5.75732
P04276	Vitamin D-binding protein OS=Rattus norvegicus OX=10116 GN=Gc PE=1 SV=3 - [VTDB_RAT]	2	11	20	159	2.21949	0.923316	0.975665	1.50148	0.799198	0.663785	0.906704	0.658457	0.476768	0.494762	1.0778	1.37608	0.430158	0.591304	2.06495	0.999643	0.615133	0.723652	1.28651	0.587782	0.581851	0.789779	0.76271	1.50462	1.42445	1.536	0.808991	1.27165	0.667235	1.47569	1.47577	0.769203	0.821979	0.48734	0.649031	0.840125	507.832	38.66	53.509	5.85889
A0A0G2JSS8	Peroxiredoxin 5, isoform CRA_c OS=Rattus norvegicus OX=10116 GN=Prdx5 PE=1 SV=1 - [A0A0G2JSS8_RAT]	2	11	16	191	1.10159	0.969777	0.985306	1.36021	1.05313	0.706373	0.964647	0.627128	0.811279	0.713649	1.2619	1.55248	0.635087	0.849023	1.10724	1.14659	0.686507	0.92676	1.34764	0.74771	0.66256	0.914339	0.693494	1.54885	0.839408	1.43202	0.88375	1.19622	0.86853	2.05128	1.53027	0.962444	0.761346	0.703515	0.916806	0.897898	796.304	47.42	22.1926	8.66064
P84817	Mitochondrial fission 1 protein OS=Rattus norvegicus OX=10116 GN=Fis1 PE=1 SV=1 - [FIS1_RAT]	1	2	5	36	1.12452	1.01794	1.23175	1.20022	1.14731	0.791153	0.863726	0.704915	0.796786	0.977443	1.19864	1.06298	0.772877	0.985956	1.20624	1.38169	0.83725	0.990728	1.39345	0.971835	0.747266	0.82818	0.867725	1.61494	0.808187	1.54154	0.841744	1.23672	0.877398	1.26367	1.31899	0.799823	0.833159	0.861175	0.874026	0.885431	187.727	47.37	16.984	8.52881
G3V796	Acetyl-Coenzyme A dehydrogenase, medium chain OS=Rattus norvegicus OX=10116 GN=Acadm PE=1 SV=1 - [G3V796_RAT]	2	12	22	184	0.597897	0.897049	1.27078	0.695832	0.868788	1.1324	0.853876	1.28858	1.22564	1.14429	1.01613	0.831229	1.12822	1.06044	0.750162	0.82349	1.05937	0.96919	1.05567	1.24792	1.06516	0.987661	1.19676	0.690072	1.03532	0.619408	1.25912	0.87562	0.881721	0.693259	0.832965	1.2428	0.992232	1.06682	1.05396	0.928065	584.811	38.72	46.5418	8.41162
P06761	Endoplasmic reticulum chaperone BiP OS=Rattus norvegicus OX=10116 GN=Hspa5 PE=1 SV=1 - [BIP_RAT]	1	15	30	217	1.30095	1.01845	1.09319	1.02548	0.93596	0.894341	1.19364	0.874984	0.77284	0.890756	0.870026	1.21585	0.907911	0.822305	1.42405	0.872412	0.932686	1.00327	0.737218	1.04488	0.833963	1.04305	0.868779	0.834271	1.04219	0.985422	0.949226	0.993126	1.04154	1.29969	1.01249	0.904512	1.00081	0.835088	1.12718	1.05492	851.171	41.59	72.3024	5.16064
G3V8L3	Lamin A, isoform CRA_b OS=Rattus norvegicus OX=10116 GN=Lmna PE=1 SV=1 - [G3V8L3_RAT]	7	17	29	145	1.08247	0.859649	0.967497	0.889219	0.80776	0.979635	1.29663	0.859356	0.948742	0.95789	0.839095	1.27041	1.01364	1.0629	1.10775	0.887646	1.05925	1.06849	0.920669	0.896761	0.943657	0.962021	0.755129	0.832947	0.916487	0.745187	0.90429	0.891282	0.986389	1.92837	1.19159	1.14187	1.21411	1.00257	1.14222	0.919232	589.132	36.84	74.2667	6.97607
Q99NA5	Isocitrate dehydrogenase [NAD] subunit alpha, mitochondrial OS=Rattus norvegicus OX=10116 GN=Idh3a PE=1 SV=1 - [IDH3A_RAT]	2	10	19	151	1.30039	1.17586	0.911968	0.962516	0.96292	0.995536	1.04782	1.06282	0.975781	1.02922	0.961507	0.984241	0.894994	0.967009	1.12498	0.80335	0.932985	0.862617	0.765429	0.756057	0.794387	1.29617	0.993222	0.73455	1.01757	1.08675	0.995695	0.948704	1.10627	1.14648	1.16951	0.854872	0.897783	0.95756	0.583389	1.15046	536.212	39.07	39.588	6.91748
P20767	Ig lambda-2 chain C region OS=Rattus norvegicus OX=10116 PE=4 SV=1 - [LAC2_RAT]	1	2	4	11	1.33981	0.782945			1.52279	0.820349			0.831537	0.621255			1.32939	1.21194			1.86754	1.5432			1.55921	2.27443			1.5604	0.920123			1.85691	1.78478			1.81052	0.790092			49.45	46.15	11.3106	5.98584
Q5XIG4	OCIA domain-containing protein 1 OS=Rattus norvegicus OX=10116 GN=Ociad1 PE=1 SV=1 - [OCAD1_RAT]	1	3	7	23	1.13214	1.34828	0.965254	1.16347	1.16951	0.93142	0.996409	0.848661	0.830445	1.07496	1.07453	1.03488	0.653291	1.1632	1.18532	0.950748	0.714689	1.1625	0.94948	1.10807	0.70855	1.19443	1.0416	1.08071	1.03965	1.51655	1.11578	1.16465	0.858903	1.28559	1.25289	1.08013	0.748698	0.898543	1.14125	1.20718	100.719	34.41	27.6418	7.41553
A0A0G2JVH4	MICOS complex subunit MIC60 OS=Rattus norvegicus OX=10116 GN=Immt PE=1 SV=1 - [A0A0G2JVH4_RAT]	3	19	39	188	0.598471	0.931245	1.03246	0.640039	0.900969	1.26219	0.997703	1.27894	1.19655	1.33301	0.969587	0.714601	1.19108	1.18492	0.601768	0.94978	1.22968	1.09451	0.870158	1.17916	1.15822	0.870746	1.19491	0.712694	0.979796	0.689921	1.0837	0.827803	1.17702	0.675973	0.869774	1.16054	1.11402	1.14818	0.922213	0.887481	848.356	42.01	86.1759	5.84619
B2GV06	Succinyl-CoA:3-ketoacid coenzyme A transferase 1, mitochondrial OS=Rattus norvegicus OX=10116 GN=Oxct1 PE=1 SV=1 - [SCOT1_RAT]	1	12	18	234	0.796038	0.667916	1.08966	0.8404	0.915345	0.869289	0.920419	1.37336	1.09523	1.04831	1.09432	1.2089	1.07959	0.997379	0.930441	0.987533	1.07821	0.966831	1.11103	1.03893	0.950987	0.912544	1.26387	0.725979	0.759715	0.576624	0.932154	0.780333	0.999902	1.03948	0.973518	1.18082	0.988602	1.1388	1.34664	0.945773	801.611	39.62	56.1681	8.47021
D4A4W6	RCG20695, isoform CRA_b OS=Rattus norvegicus OX=10116 GN=Slirp PE=1 SV=1 - [D4A4W6_RAT]	1	1	2	5			1.20358				0.855579				1.07288				1.47136				1.13746				0.698407				0.853997				1.64384				1.37159		45.57		12.5684	7.6499
P11507	Sarcoplasmic/endoplasmic reticulum calcium ATPase 2 OS=Rattus norvegicus OX=10116 GN=Atp2a2 PE=1 SV=1 - [AT2A2_RAT]	6	34	52	527	0.494992	0.779405	0.988761	0.549679	0.98312	1.45087	1.17391	1.41247	1.19998	1.43106	1.0078	0.482748	1.29788	1.28907	0.48074	0.952625	1.31742	1.11008	0.912837	1.04554	1.45206	0.894716	1.24942	0.579765	0.873392	0.563239	1.28882	0.839557	1.17293	0.447711	0.884239	1.16788	1.17574	1.28208	0.812179	0.887976	2003.33	98	114.694	5.33838
A0A0G2K4U2	Glutathione S-transferase, mu 7 OS=Rattus norvegicus OX=10116 GN=Gstm7 PE=1 SV=1 - [A0A0G2K4U2_RAT]	11	2	11	124	0.663813	1.24152		1.12988	0.833633	0.903369		1.10279	0.87683	1.65084		0.825763	1.13655	1.03583		1.13001	1.2855	0.918115		0.912713	1.20652	0.92132		1.13466	1.05677	1.13634		0.880238	1.16828	0.592541		1.26021	0.911368	1.17307		1.09446	565.387	33	25.645	7.32764
M0R7G4	MICOS complex subunit OS=Rattus norvegicus OX=10116 GN=Apoo PE=1 SV=2 - [M0R7G4_RAT]	2	4	6	37	0.822074	0.930601	1.07292	0.832673	0.964135	1.14006	1.02797	1.05116	1.20906	1.15062	1.06292	0.799219	0.969249	1.05	0.998377	0.93365	0.988212	0.943049	0.842622	1.14369	1.025	0.89546	1.05608	0.92679	1.05907	0.875893	1.09207	0.921317	1.04767	0.772529	1.09279	1.04433	0.987391	1.05049	0.835063	0.962635	239.863	8	22.3555	9.12939
P21571	ATP synthase-coupling factor 6, mitochondrial OS=Rattus norvegicus OX=10116 GN=Atp5pf PE=1 SV=1 - [ATP5J_RAT]	1	5	8	115	1.27491	0.911506	0.880856	1.59744	0.975802	0.48463	0.701793	0.415836	0.602126	0.653932	1.09069	1.50436	0.433133	0.748596	1.80784	1.10201	0.506083	0.967645	1.06683	0.63126	0.490533	0.896886	0.532504	1.9783	1.08688	1.62104	0.715414	1.55401	0.739225	1.61072	1.60186	0.748589	0.586577	0.422435	1.47219	0.941136	367.922	31	12.4866	9.43701
P97521	Mitochondrial carnitine/acylcarnitine carrier protein OS=Rattus norvegicus OX=10116 GN=Slc25a20 PE=1 SV=1 - [MCAT_RAT]	2	8	13	100	0.728599	0.929971	1.09629	0.639069	0.988614	1.19631	1.15685	1.41856	1.23927	1.4293	1.10549	0.666984	1.22975	1.13196	0.585922	0.9303	1.08233	1.17195	1.21874	1.04325	1.02242	0.819155	1.22515	0.694058	1.13167	0.749835	1.27972	0.865275	1.05235	0.620183	0.887377	1.28765	1.03845	1.27301	0.826488	1.04685	392.337	22	33.1322	9.48096
Q6P6V0	Glucose-6-phosphate isomerase OS=Rattus norvegicus OX=10116 GN=Gpi PE=1 SV=1 - [G6PI_RAT]	1	6	20	162	0.996778	0.970563	1.09003	0.930065	1.22437	1.29603	1.02004	1.46636	1.11041	0.99664	0.896884	0.600457	1.04641	0.939925	0.821799	1.3871	0.79852	1.16555	0.825211	0.749464	2.05273	1.14389	1.13557	0.893057	1.02935	0.649392	1.84423	1.12497	1.1562	0.563315	1.26675	0.880504	1.32797	1.1185	1.10075	0.929829	636.927	35	62.7871	7.76709
Q7TQ16	Cytochrome b-c1 complex subunit 8 OS=Rattus norvegicus OX=10116 GN=Uqcrq PE=3 SV=1 - [QCR8_RAT]	1	3	5	35	1.36056	0.921994	1.14785	0.810303	1.40337	0.864775	0.938072	1.32022	1.02818	1.10399	1.22266	0.751497	1.08822	0.954986	0.850659	1.4926	1.52718	1.08885	1.32575	1.34925	1.1498	0.889176	0.965871	1.86897	1.19388	0.850372	1.12673	1.11434	1.40835	0.889975	1.09643	1.15428	0.88974	0.926778	1.21102	1.00307	108.295	8	9.84321	10.521
P63102	14-3-3 protein zeta/delta OS=Rattus norvegicus OX=10116 GN=Ywhaz PE=1 SV=1 - [1433Z_RAT]	2	7	14	85	1.08507	1.07275	0.941709	1.10027	0.988928	0.993997	1.15572	1.06144	1.11887	0.973503	1.08793	0.855752	0.859708	0.977408	0.99836	0.979576	1.00044	0.811181	0.945804	1.00303	0.920003	1.16615	1.08072	1.00135	1.25263	1.18431	1.09097	1.07867	1.01248	0.782086	0.901373	0.992182	1.106	0.944982	0.785249	1.08995	363.47	21	27.7537	4.79248
Q9JJW3	Up-regulated during skeletal muscle growth protein 5 OS=Rattus norvegicus OX=10116 GN=Atp5md PE=1 SV=1 - [USMG5_RAT]	1	3	5	91	0.604703	0.962527	0.850386	0.737363	0.955693	1.16909	1.01783	1.12492	1.32381	1.4323	1.15244	0.779944	1.13182	1.27881	0.591838	1.21544	1.24349	0.920926	0.959913	1.27452	1.0385	0.973694	1.22882	1.14156	1.08054	0.800336	1.02424	0.932237	1.08443	0.648728	0.643834	1.09682	0.917179	1.16767	0.637691	0.948443	336.491	23	6.40337	9.83252
P62894	SWISS-PROT:P62894 Cytochrome c - Bos taurus (Bovine).	2	1	8	78		1.28701	0.962997	1.21098		0.824081	0.625332	1.20282		0.893376	0.679107	0.88715		0.644895	0.756462	0.792129		0.928333	0.736372	1.06181		0.906779	0.79713	1.37754		1.07225	0.477149	0.64137		1.2339	0.909102	0.96343		0.804968	0.969573	1.11217	249.12	21	11.6961	9.49561
Q9EQX9	Ubiquitin-conjugating enzyme E2 N OS=Rattus norvegicus OX=10116 GN=Ube2n PE=1 SV=1 - [UBE2N_RAT]	2	5	7	23	1.80593	1.11801	0.889835	1.08504	1.06019	0.903638	0.973225	0.999924	0.728825	0.941274	0.856184	1.08001	0.693059	0.829322	1.22058	0.885791	0.860063	1.02404	0.986376	1.12627	0.792643	1.21212	0.882174	0.861033	1.01483	1.38856	0.962681	0.94577	1.12202	1.45533	1.4483	0.937674	0.857298	0.880602	1.02497	1.18032	116.704	5	17.113	6.56592
P62078	Mitochondrial import inner membrane translocase subunit Tim8 B OS=Rattus norvegicus OX=10116 GN=Timm8b PE=3 SV=1 - [TIM8B_RAT]	1	4	5	39	1.84303	1.05113	0.907027	1.50701	1.21707	0.652632	0.814128	0.551623	0.550889	0.567247	1.06735	1.29922	0.431843	0.697672	1.59302	1.10662	0.543046	0.938017	1.10593	0.624796	0.624874	0.850067	0.509986	1.69952	1.01598	1.89324	0.80844	1.34069	0.740275	2.1531	1.81153	0.827062	0.650244	0.563026	1.1138	0.891987	188.181	13	9.28052	5.12256
Q60587	Trifunctional enzyme subunit beta, mitochondrial OS=Rattus norvegicus OX=10116 GN=Hadhb PE=1 SV=1 - [ECHB_RAT]	2	14	19	222	0.651287	0.932438	1.04949	0.626777	0.930426	1.22103	0.876594	1.21323	1.1718	1.2747	1.08535	0.616471	1.26318	1.10216	0.504307	0.863092	1.22802	1.08502	1.00026	1.18592	1.2603	0.967537	1.13036	0.705984	0.995643	0.616353	1.21408	0.86075	0.979105	0.509726	0.721512	1.12582	1.01532	1.19295	0.846833	0.8643	856.907	48	51.3815	9.46631
A0A0G2K654	Histone cluster 1 H1 family member c OS=Rattus norvegicus OX=10116 GN=Hist1h1c PE=1 SV=1 - [A0A0G2K654_RAT]	3	6	14	127	0.748525	0.621515	1.13505	0.720084	1.04647	0.954136	1.1798	1.0131	1.0877	1.1326	1.12153	0.906547	1.16367	1.06068	0.60193	1.04037	1.18978	1.07003	1.11668	1.07481	1.09218	0.503375	0.942842	1.01079	0.92524	0.939857	0.879015	0.874369	0.864411	0.8912	1.01666	1.19669	1.08844	1.12457	1.00043	0.698737	609.709	32	21.3037	11.0044
A0A0G2JUM8	Cytochrome c oxidase assembly factor 6 OS=Rattus norvegicus OX=10116 GN=Coa6 PE=1 SV=1 - [A0A0G2JUM8_RAT]	1	2	3	6	1.37061				1.11089				0.633178				0.581592				0.471968				0.557011				0.821317				0.768744				0.646166				54.5233		9.36233	7.75244
P48037	Annexin A6 OS=Rattus norvegicus OX=10116 GN=Anxa6 PE=1 SV=2 - [ANXA6_RAT]	2	16	31	193	0.870369	0.924567	0.928268	1.0066	1.14613	1.0041	1.01445	1.07587	1.03394	1.11404	1.00864	0.855866	1.04401	0.981232	0.847587	1.30996	1.06114	0.905242	0.963516	1.07875	1.03034	1.17375	1.05501	1.21984	1.04691	1.20239	1.08509	1.15031	1.06734	0.67862	0.966368	0.862999	1.03078	1.05368	0.813078	0.929922	574.258	48	75.7065	5.56689
Q4PP99	Cardiac troponin C OS=Rattus norvegicus OX=10116 GN=Tnnc1 PE=2 SV=1 - [Q4PP99_RAT]	1	5	8	670	1.91334	1.47925	0.902845	1.5944	1.07814	0.798017	0.882576	0.750325	0.675794	0.650662	0.908531	1.05177	0.526801	0.75268	1.37284	1.2346	0.554134	0.971713	0.941633	0.786527	0.637254	1.05217	0.834765	1.45567	1.07905	1.87939	0.98326	1.4873	0.890576	1.57726	1.55047	1.14436	0.771698	0.659464	0.771793	1.21413	2237.33	169	18.4085	4.18311
G3V7Y3	ATP synthase subunit delta, mitochondrial OS=Rattus norvegicus OX=10116 GN=Atp5f1d PE=1 SV=1 - [G3V7Y3_RAT]	3	4	5	219	1.68455	1.07841	0.927525	1.29059	1.05025	0.663866	0.875884	0.672234	0.644868	0.653046	0.88809	1.20782	0.511062	0.819268	1.63043	0.973994	0.609477	0.946236	0.826334	0.850941	0.639563	1.06061	0.726998	1.4032	1.1254	1.46036	0.831654	1.20486	0.916798	1.77362	1.38432	0.853632	0.78144	0.588928	1.23778	1.19305	644.374	51	17.5522	5.23682
Q80W89	NADH dehydrogenase [ubiquinone] 1 alpha subcomplex subunit 11 OS=Rattus norvegicus OX=10116 GN=Ndufa11 PE=2 SV=1 - [NDUAB_RAT]	1	2	4	20	1.07566	0.967751	0.983049	0.834822	1.03645	1.08541	1.25916	1.00865	1.01112	1.08744	1.04602	0.879992	0.864977	1.09835	1.0639	1.05044	0.961337	0.881347	1.10447	0.733548	1.19496	1.14032	1.23968	1.16463	0.8624	0.959478	1.32968	1.08296	1.01465	0.950078	1.22095	1.30464	1.09822	0.970814	0.572947	1.00793	113.57	6	14.8443	8.08936
P21913	Succinate dehydrogenase [ubiquinone] iron-sulfur subunit, mitochondrial OS=Rattus norvegicus OX=10116 GN=Sdhb PE=2 SV=2 - [SDHB_RAT]	1	8	16	196	0.865724	1.09552	0.979864	0.988277	1.08759	1.03194	0.794919	1.18597	1.00531	1.15361	0.861951	0.877356	1.07949	1.03351	0.805518	1.05493	1.02845	0.852587	0.828942	0.991341	1.07951	1.03071	1.07877	1.0688	1.03597	0.980728	0.955106	0.816635	1.05134	0.692936	0.841923	0.892361	0.926477	1.05867	0.837909	1.15443	551.043	52	31.8089	8.67529
F1LQ95	Troponin T, cardiac muscle OS=Rattus norvegicus OX=10116 GN=Tnnt2 PE=4 SV=3 - [F1LQ95_RAT]	3	12	28	638	1.70479	0.904682	0.937588	1.30434	1.12689	0.766488	0.994971	0.675264	0.721314	0.651689	0.880001	1.18095	0.511266	0.775221	1.58455	0.912598	0.588646	1.00166	0.916131	0.720123	0.577574	0.848215	0.67519	1.14007	0.896148	1.59371	0.898572	1.33037	0.825457	2.14439	1.99089	0.878805	0.794961	0.586737	1.01131	1.11849	1704.22	170	35.3497	5.0083
G3V7I0	Peroxiredoxin 3 OS=Rattus norvegicus OX=10116 GN=Prdx3 PE=1 SV=1 - [G3V7I0_RAT]	2	10	12	184	1.05629	1.10606	0.946151	1.19126	1.01974	0.880723	0.793407	0.893771	0.880937	0.943853	1.11562	1.11764	0.783252	0.900885	1.20208	1.08991	0.869533	0.845821	0.894527	1.03734	0.871123	1.19567	1.04824	1.25636	1.07722	1.26108	1.02584	1.05075	0.983344	1.09084	0.955613	0.886163	0.786292	0.893551	0.858775	1.03876	735.351	50	28.2815	7.54736
P97576	GrpE protein homolog 1, mitochondrial OS=Rattus norvegicus OX=10116 GN=Grpel1 PE=1 SV=2 - [GRPE1_RAT]	2	5	9	41	1.17271	1.00616	0.918586	1.33645	0.928139	0.760884	1.07243	0.670638	0.855216	0.553463	1.14337	1.36853	0.600339	0.935093	1.15323	0.932099	0.553557	0.837075	1.01993	0.504722	0.590715	1.02067	0.841812	1.4416	0.976293	1.56175	1.03026	1.33758	0.839201	1.89829	1.23017	0.794177	0.643352	0.564089	0.718743	1.01787	110.221	11	24.2819	8.38232
F1M953	Stress-70 protein, mitochondrial OS=Rattus norvegicus OX=10116 GN=Hspa9 PE=1 SV=1 - [F1M953_RAT]	2	20	28	357	1.16973	1.05567	1.05375	0.97941	1.06727	1.03362	1.00776	0.964775	0.957713	0.960176	0.921883	1.142	0.867831	1.01298	1.26837	0.863982	0.877784	0.94769	0.897418	0.9586	0.804759	1.17093	0.888998	0.890936	1.00731	0.94469	1.0273	0.96712	1.01686	1.28554	0.960591	0.910754	0.924409	0.879236	1.08838	1.07733	1515.86	93	73.6988	6.16357
Q5BJZ3	Nicotinamide nucleotide transhydrogenase OS=Rattus norvegicus OX=10116 GN=Nnt PE=1 SV=1 - [Q5BJZ3_RAT]	1	38	50	635	0.46657	0.867627	1.0698	0.474808	0.989511	1.32808	0.717032	1.26014	1.38236	1.45286	0.93919	0.501833	1.4916	0.929241	0.38309	0.842197	1.44582	1.23728	0.923622	0.846675	1.46417	0.833881	1.16838	0.551163	0.965541	0.499833	1.21844	0.815186	1.24603	0.521052	0.832404	1.2024	1.2362	1.27399	1.03219	0.857521	3710.24	134	113.796	7.88428
A0A0G2K7K2	Apoptosis-inducing factor 1, mitochondrial OS=Rattus norvegicus OX=10116 GN=Aifm1 PE=1 SV=1 - [A0A0G2K7K2_RAT]	2	12	21	86	0.42037	0.804919	0.920672	0.533429	0.965039	1.31616	0.998922	1.50419	1.45	1.45857	1.1381	0.658163	1.30734	1.33761	0.451964	0.914579	1.2971	1.07836	1.00288	1.22731	1.16741	0.837767	1.49855	0.572212	0.990062	0.392223	1.19171	0.773132	1.03716	0.44236	0.7103	1.21861	1.09055	1.34924	0.907077	0.977284	398.058	15	66.0925	8.89502
G3V7K1	Myomesin 2 OS=Rattus norvegicus OX=10116 GN=Myom2 PE=1 SV=1 - [G3V7K1_RAT]	1	27	59	385	0.54726	0.995353	1.11035	0.530316	0.809449	1.39889	0.948849	1.29105	1.16487	1.54479	0.864581	0.531177	1.432	1.34475	0.407271	0.801896	1.38275	1.35741	0.771652	1.11516	1.49731	0.832992	0.998957	0.438809	0.726475	0.279948	1.2178	0.663997	1.10945	0.408705	0.788456	1.31033	1.37264	1.48123	1.02226	0.951454	1486.12	75	164.609	5.88428
D3ZAF6	ATP synthase subunit f, mitochondrial OS=Rattus norvegicus OX=10116 GN=Atp5mf PE=1 SV=1 - [ATPK_RAT]	1	3	6	142	0.82382	0.809252	1.08683	0.906263	1.31557	1.00277	0.753028	0.984662	1.07454	1.08711	1.20895	0.780151	1.00876	1.05328	0.744708	1.78138	1.01226	0.90197	1.38644	1.06325	1.22473	0.77124	0.997939	1.84774	0.919268	0.826677	0.938344	1.03671	0.932352	0.549745	0.74106	0.978757	0.921512	1.07038	1.13594	0.870665	435.031	42	10.4456	10.0376
B0BN81	40S ribosomal protein S5 OS=Rattus norvegicus OX=10116 GN=Rps5 PE=1 SV=1 - [B0BN81_RAT]	3	3	6	23	1.3271	1.04465			1.08586	0.801036			0.971565	1.17199			1.18654	0.92792			1.19814	0.863876			1.0431	0.99229			1.18735	1.17849			1.05268	0.530542			1.04939	1.23937			203.42	2	22.8921	9.71533
P62982	Ubiquitin-40S ribosomal protein S27a OS=Rattus norvegicus OX=10116 GN=Rps27a PE=1 SV=2 - [RS27A_RAT]	7	4	7	34	0.873447	1.11065	0.801461	0.851301	0.876462	1.17346	0.958592	1.14653	1.36691	1.22949	0.741479	1.02969	1.48718	1.1564	0.749205	1.54183	1.0316	1.10116	0.776405	1.19963	1.03466	1.27297	1.11396	1.60909	1.08412	0.868874	0.976477	1.6109	1.05827	0.962934	1.154	1.03057	1.15832	1.20587	0.651656	0.954646	168.204	7	17.9395	9.64209
Q68FY0	Cytochrome b-c1 complex subunit 1, mitochondrial OS=Rattus norvegicus OX=10116 GN=Uqcrc1 PE=1 SV=1 - [QCR1_RAT]	1	17	28	311	0.817812	0.963599	1.04149	0.92135	1.0144	1.11447	1.02071	1.18332	1.08516	1.09972	0.993244	0.921238	1.00725	0.997695	1.02308	1.05041	1.00391	0.894298	0.88976	0.976762	1.11804	1.06953	1.11886	0.912617	0.946985	0.82627	1.1753	1.00887	1.12659	0.73008	1.01058	1.01609	0.957937	0.998523	0.926879	1.02954	1291.91	71	52.8154	5.88428
Q5I0K3	Citramalyl-CoA lyase, mitochondrial OS=Rattus norvegicus OX=10116 GN=Clybl PE=2 SV=2 - [CLYBL_RAT]	1	6	9	27	0.651242	0.615442	1.07213	1.17534	0.762053	1.24324	1.22758	0.87209	1.07903	0.555289	1.01535	1.47589	0.746154	1.10038	1.38141	1.09332	0.713459	0.780423	1.06958	1.14059	0.926309	0.951943	1.00836	2.18443	0.838461	0.949411	1.01745	0.997082	0.977163	1.33454	0.99461	1.00179	0.561361	1.0746	1.37069	1.09168	170.32	10	37.2976	7.97217
P62632	Elongation factor 1-alpha 2 OS=Rattus norvegicus OX=10116 GN=Eef1a2 PE=1 SV=1 - [EF1A2_RAT]	4	10	22	139	0.599404	0.81077	0.980892	0.569423	0.915435	1.1851	1.17072	1.26793	1.29988	1.37698	1.06718	0.698038	1.34302	1.21556	0.625443	0.828659	1.18139	1.05743	1.03252	1.23846	1.10522	0.848819	1.24499	0.627366	1.01217	0.605238	1.07461	0.815722	1.07749	0.683741	0.815558	1.12095	1.118	1.23451	0.957568	0.818263	524.92	28	50.4223	9.02686
P63018	Heat shock cognate 71 kDa protein OS=Rattus norvegicus OX=10116 GN=Hspa8 PE=1 SV=1 - [HSP7C_RAT]	6	11	29	392	0.886724	1.00261	1.10082	0.829535	0.922239	1.09215	1.05133	1.18771	1.01505	1.08278	1.01122	1.07038	1.00183	0.994251	1.17244	0.911722	1.02088	0.936921	0.82704	0.988437	0.990223	1.21356	1.03852	0.812573	0.973272	0.812854	1.09019	0.904091	1.03642	1.08111	0.823558	0.974883	1.14086	1.02492	1.03125	1.00194	1591.31	96	70.8272	5.51611
Q66HF3	Electron transfer flavoprotein-ubiquinone oxidoreductase, mitochondrial OS=Rattus norvegicus OX=10116 GN=Etfdh PE=1 SV=1 - [Q66HF3_RAT]	2	16	24	234	0.648957	0.958816	1.13295	0.568996	0.979482	1.32428	0.940961	1.21701	1.36351	1.23682	1.20294	0.654429	1.31466	1.14009	0.528416	0.93657	1.13122	1.04821	0.94149	1.30846	1.16368	0.981482	1.30823	0.706501	0.989627	0.704671	1.18518	0.813176	0.97683	0.534199	0.82083	1.16487	1.04847	1.1156	0.966442	0.85848	1253.18	54	68.1207	7.56201
A0A096MJ01	LIM domain-binding 3 OS=Rattus norvegicus OX=10116 GN=Ldb3 PE=1 SV=1 - [A0A096MJ01_RAT]	1	6	28	283	0.941218	1.05096	0.904979	0.948028	1.06376	1.14577	0.919774	1.12698	0.933315	0.897997	1.04209	0.906423	0.765758	0.964181	1.31573	0.896003	0.809679	1.06632	1.11829	1.09926	0.863818	1.1042	0.937414	0.898488	0.859662	1.15691	0.918836	0.994223	0.911169	1.63199	1.10422	0.963572	1.23892	0.94951	1.0543	0.89473	1166.31	65	76.7675	7.75244
P60712;P60711	SWISS-PROT:P60712 (Bos taurus) Actin, cytoplasmic 1	4	3	19	922	0.986247	1.19272	0.924087	0.718725	0.707101	1.13641	1.13475	1.34529	1.20167	0.979753	0.90653	0.683653	1.35551	0.945612	0.833453	0.985136	1.09279	0.841084	0.840698	1.0654	1.30485	1.10542	1.1837	0.572096	1.01819	0.719989	1.17195	0.874353	0.908737	0.732587	0.866037	1.12014	1.25747	1.12521	0.760384	0.917889	1979.92	194	41.7097	5.47803
D3ZJ08	Histone H3 OS=Rattus norvegicus OX=10116 GN=Hist2h3c2 PE=1 SV=1 - [D3ZJ08_RAT]	6	1	5	66	0.797783	1.153		0.8634	0.902239	1.07799		1.38085	1.3717	1.24029		0.522931	1.60267	1.37078		1.05155	1.46014	1.02432		0.572082	2.10444	0.936227		1.38058	1.18708	0.65221		0.768629	1.13077	1.38667		1.11843	1.62261	1.63694		0.850928	93.9943	15	15.3785	11.2681
D3ZK97	Histone H3 OS=Rattus norvegicus OX=10116 GN=H3f3c PE=3 SV=1 - [D3ZK97_RAT]	7	1	5	63		0.766039				1.55994				1.61763				1.52843				1.41868				0.934633				0.50144				0.587153				1.69995			120.439	13	15.3485	11.2681
Q4KM73	UMP-CMP kinase OS=Rattus norvegicus OX=10116 GN=Cmpk1 PE=1 SV=2 - [KCY_RAT]	3	4	7	32	2.03116	1.09808	1.18909	1.3066	0.984107	0.676027	1.01158	0.661645	0.671247	0.672762	0.840906	1.15183	0.584567	0.787741	1.52203	0.927205	0.72065	1.03923	1.05792	0.80795	0.711053	0.933376	0.78218	1.13888	0.954138	1.42601	0.935591	1.18223	0.870464	1.80452	1.84864	0.853722	0.851106	0.769953	1.2215	1.08829	155.252	10	22.1552	5.8335
G3V8L9	Caveolae-associated protein 1 OS=Rattus norvegicus OX=10116 GN=Cavin1 PE=1 SV=1 - [G3V8L9_RAT]	2	9	20	97	0.97882	0.957732	0.941129	0.955674	0.972579	0.950508	1.0401	1.09727	0.888781	0.893704	1.02449	1.36602	0.775072	0.990799	1.32269	0.942503	0.830228	1.0322	1.07752	1.04679	0.887381	0.98192	0.834467	0.992299	0.974106	1.03613	1.01941	1.08119	0.932495	1.86913	1.24968	0.927439	0.945919	0.89172	1.20796	1.09141	310.708	25	43.882	5.51611
Q497B0	Omega-amidase NIT2 OS=Rattus norvegicus OX=10116 GN=Nit2 PE=1 SV=1 - [NIT2_RAT]	1	7	12	60	0.771013	0.999954	1.00799	0.815613	0.893242	1.19097	1.08133	1.06823	1.16269	1.18191	0.98386	1.25169	0.98141	1.00898	1.03337	0.887057	1.01121	1.04359	1.17152	0.838556	1.09912	0.962569	1.05249	0.875944	0.883486	0.754539	0.944335	0.924928	1.11651	1.16001	1.34233	1.16741	0.999349	1.03484	0.898973	0.84574	252.168	13	30.6817	7.29834
G3V734	2,4-dienoyl CoA reductase 1, mitochondrial, isoform CRA_a OS=Rattus norvegicus OX=10116 GN=Decr1 PE=1 SV=1 - [G3V734_RAT]	2	7	13	141	0.776806	1.02466	1.2961	0.776179	1.0311	1.25518	0.756816	0.99899	1.08801	0.887352	1.25807	0.7132	1.15929	0.91688	0.572774	0.818434	1.05131	1.09129	1.01826	1.09294	1.15808	0.999346	1.19992	1.11043	1.11795	0.783271	1.21853	1.10468	0.779682	0.669557	0.70465	1.2352	1.04506	0.967681	0.995299	0.785721	336.261	34	36.1097	8.93896
D4A6G6	Ribosomal protein S19-like OS=Rattus norvegicus OX=10116 GN=LOC100362339 PE=4 SV=1 - [D4A6G6_RAT]	8	2	8	26	1.14863	1.20013	1.01785	1.21043	0.727748	0.920972	0.67418	1.15346	1.00928	1.16846	0.552292	0.866924	1.24117	0.872679	0.902857	1.15114	1.08457	0.823789	1.03617	1.263	1.10054	0.894293	0.856485	1.21905	1.19826	1.10631	0.770125	0.853092	1.01849	0.71023	0.860083	0.827126	0.872151	1.06425	1.0409	1.10304	80.46	10	16.1076	10.4038
Q68FT1	Ubiquinone biosynthesis protein COQ9, mitochondrial OS=Rattus norvegicus OX=10116 GN=Coq9 PE=1 SV=2 - [COQ9_RAT]	1	8	14	144	1.32814	1.11097	0.911173	1.3039	1.00707	0.838084	0.996841	0.959768	0.877909	0.721149	0.851065	1.23156	0.797151	0.8381	1.25224	1.09937	0.744344	0.720394	0.672162	0.916658	0.766979	1.40478	0.914006	1.0417	1.10332	1.2802	1.46865	1.18971	1.05107	1.0612	1.48258	0.867499	0.910332	0.784449	0.857768	1.29567	646.263	37	35.1235	5.77002
G3V936	Citrate synthase OS=Rattus norvegicus OX=10116 GN=Cs PE=1 SV=1 - [G3V936_RAT]	2	16	23	379	0.711206	0.902581	0.982053	0.825299	1.16306	1.1126	0.89184	1.15944	1.1739	1.24881	1.0864	0.691644	1.1294	1.13693	0.697925	1.19963	1.18912	0.952029	1.01386	1.15953	1.17687	0.945122	1.14769	1.14899	0.991681	0.961239	1.10813	0.994648	1.12511	0.579281	0.891205	1.00221	0.946314	1.10227	0.869785	0.96748	1564.48	96	51.7975	8.41162
D3ZZN3	Acetyl-coenzyme A synthetase OS=Rattus norvegicus OX=10116 GN=Acss1 PE=3 SV=1 - [D3ZZN3_RAT]	1	10	24	119	0.53815	0.986859	0.922962	0.631589	1.07656	1.10359	1.25192	1.27789	1.24448	1.34232	1.04951	0.636327	1.40074	1.19936	0.577854	1.01975	1.33545	1.00301	0.887147	1.16924	1.51561	0.969464	1.27947	0.665106	0.920092	0.660767	1.1162	0.763396	1.10067	0.508647	0.772511	1.11902	1.18392	1.16188	0.882238	1.04402	474.022	27	74.8439	6.85889
P62076	Mitochondrial import inner membrane translocase subunit Tim13 OS=Rattus norvegicus OX=10116 GN=Timm13 PE=3 SV=1 - [TIM13_RAT]	1	1	3	88	1.93764	1.04107	1.0463	1.39913	1.33995	0.813009	0.829004	0.674384	0.622476	0.715642	1.00075	1.30209	0.553636	0.846168	1.72403	1.05584	0.615854	0.992909	1.13305	0.859327	0.645986	0.91301	0.701173	1.61868	1.01711	1.55749	0.750862	1.18702	0.804726	1.74217	1.79205	0.862903	0.742856	0.721036	1.24199	1.04123	679.89	23	10.4509	8.17725
P29266	3-hydroxyisobutyrate dehydrogenase, mitochondrial OS=Rattus norvegicus OX=10116 GN=Hibadh PE=1 SV=3 - [3HIDH_RAT]	1	12	19	103	1.07605	1.18864	1.02438	1.04659	0.923305	0.925526	1.09273	0.999014	0.994863	1.02244	0.973027	1.00189	0.890298	1.05413	1.27546	0.959687	0.852584	1.01934	0.962218	0.924576	0.866809	1.19759	1.09275	0.914358	0.920797	1.10317	0.997289	1.07598	0.966864	1.26523	1.15748	0.973109	0.849972	0.910755	1.06838	1.26068	605.431	27	35.2796	8.47021
Q68FZ8	Propionyl coenzyme A carboxylase, beta polypeptide OS=Rattus norvegicus OX=10116 GN=Pccb PE=1 SV=1 - [Q68FZ8_RAT]	2	10	16	46	0.714764	0.96352	1.02731	0.594129	1.06696	1.17343	0.986878	1.26073	1.16277	1.66394	1.03353	0.738873	1.43674	1.24432	0.63531	0.835716	1.39544	1.06232	0.819153	1.20889	1.46434	0.918272	1.2705	0.672557	1.08932	0.647651	1.09424	0.86865	1.22214	0.581048	1.00214	1.18003	1.13806	1.35437	0.921614	0.899584	355.257	7	58.6411	7.84033
Q5RJN0	NADH dehydrogenase (Ubiquinone) Fe-S protein 7 OS=Rattus norvegicus OX=10116 GN=Ndufs7 PE=1 SV=1 - [Q5RJN0_RAT]	1	4	6	43	0.509479	0.957628	1.06563	0.548302	0.775402	1.54969	1.19114	1.2169	1.35185	1.37459	1.13695	0.568876	1.51868	1.50332	0.709437	0.893256	1.27669	1.41854	1.01174	1.19877	1.30441	0.9628	1.26516	0.699699	0.899608	0.561595	1.14804	0.806871	1.04899	0.776564	1.10611	1.18099	1.23996	1.29703	1.35164	0.919736	263.507	8	23.9294	9.99365
F1LX07	Solute carrier family 25 member 12 OS=Rattus norvegicus OX=10116 GN=Slc25a12 PE=1 SV=3 - [F1LX07_RAT]	3	13	21	180	0.591549	0.907421	1.10121	0.619216	0.980163	1.31582	1.09852	1.333	1.36077	1.36019	1.00787	0.565196	1.51535	1.14646	0.512925	0.991371	1.42593	1.06399	0.935679	1.11652	1.30094	0.873838	1.45186	0.712647	0.969588	0.677772	1.18975	0.847051	1.19098	0.552721	0.99926	1.15537	1.10388	1.27445	1.02078	0.875391	876.028	38	71.8713	8.11865
Q5U3Y8	Transcription factor BTF3 OS=Rattus norvegicus OX=10116 GN=Btf3 PE=1 SV=1 - [Q5U3Y8_RAT]	1	1	4	7				1.16051				0.874768				1.3494				1.39836				1.02722				1.16589				1.01847				0.925634				0.98495	63.84	2	17.6882	7.50342
B4F789	Apolipoprotein B editing complex 2 (Predicted), isoform CRA_a OS=Rattus norvegicus OX=10116 GN=Apobec2 PE=1 SV=1 - [B4F789_RAT]	1	4	6	29	1.32563	1.44973	0.850604	1.33659	0.950366	0.960445	0.75931	0.991114	0.830464	1.23979	0.6914	0.970192	0.997795	0.908168	1.05628	1.24108	1.05864	0.930801	0.776946	0.63294	0.998774	1.1906	0.911517	0.91728	1.23245	1.44608	0.973246	1.12866	1.24662	0.832741	0.775767	0.829531	1.05577	0.916243	0.599385	1.10722	107.851	4	25.6439	4.79248
P14408	Fumarate hydratase, mitochondrial OS=Rattus norvegicus OX=10116 GN=Fh PE=1 SV=1 - [FUMH_RAT]	2	17	19	238	0.680074	0.961004	1.11336	0.834607	0.896197	0.99934	0.925967	1.0512	0.977189	1.14817	0.927085	1.1733	0.96457	1.02727	1.04533	0.768991	1.03822	0.888795	0.930979	1.2609	1.03446	1.12449	1.13588	0.81178	0.990202	0.85548	1.00955	0.832973	1.08317	1.41386	0.912714	1.10161	0.910648	1.03897	1.18958	1.04257	940.023	66	54.429	8.95361
P18886	Carnitine O-palmitoyltransferase 2, mitochondrial OS=Rattus norvegicus OX=10116 GN=Cpt2 PE=1 SV=1 - [CPT2_RAT]	2	16	25	185	0.688833	0.948571	1.26668	0.705264	0.935521	1.24643	0.843027	1.4929	1.22639	1.02506	1.11393	0.650222	1.0909	1.09105	0.721725	0.966517	1.10433	0.979877	0.988021	1.23544	1.21577	0.979535	1.30389	0.856864	0.840614	0.737375	1.28942	0.889565	0.931754	0.483624	0.896177	1.22201	0.907325	1.17584	0.997746	0.926496	700.428	42	74.0634	7.32764
D4AAC3	SH3 domain-binding glutamic acid-rich-like protein OS=Rattus norvegicus OX=10116 GN=LOC102553613 PE=3 SV=3 - [D4AAC3_RAT]	2	1	3	4	1.79637				0.879687				0.685218				0.477558				0.599359				0.62621				0.982107				0.850845				0.779865				38.24		11.975	5.04639
A0A0G2JVQ1	Creatine kinase S-type, mitochondrial OS=Rattus norvegicus OX=10116 GN=Ckmt2 PE=1 SV=1 - [A0A0G2JVQ1_RAT]	3	5	22	557	1.21653	1.16296	1.0232	1.36884	1.00973	0.773631	0.767805	1.08634	0.864695	0.852834	0.91091	0.819288	0.865113	0.915171	1.27161	1.14037	0.806178	0.790252	0.962673	1.16862	0.873954	1.35799	1.1134	1.22042	1.03686	1.31329	1.05237	1.08641	0.997724	0.64108	0.881582	0.854345	0.759717	0.867987	1.13909	1.42219	2072.97	126	47.2435	9.17334
P11598	Protein disulfide-isomerase A3 OS=Rattus norvegicus OX=10116 GN=Pdia3 PE=1 SV=2 - [PDIA3_RAT]	2	7	20	98	1.10468	1.19007	1.08032	1.1316	0.72433	0.906844	1.11787	0.940234	0.865558	0.71239	0.925663	1.13413	0.930132	0.934573	1.26168	1.10322	0.969331	0.98212	0.751456	0.879797	0.809278	1.08056	0.928802	0.937868	1.04791	1.18713	1.06546	0.961791	0.930124	1.37278	0.939731	0.788403	0.980357	0.932248	0.992522	1.08855	260.42	19	56.5877	6.21436
D3ZF77	Aldo-keto reductase family 1 member C15 OS=Rattus norvegicus OX=10116 GN=Akr1c15 PE=1 SV=1 - [AK1CA_RAT]	5	3	11	36	0.74666	1.32396	1.37075	1.04828	0.823105	0.990842	1.12779	1.27471	0.929875	1.06377	1.31367	1.02423	0.942128	1.07017	1.00814	1.17488	0.948497	0.896773	1.07007	1.10024	0.956386	1.22443	1.31286	1.1105	1.03376	1.22581	1.23798	1.11072	1.12955	0.753636	0.9884	0.998044	0.936861	1.02261	0.764346	1.0907	101.604	10	37.1711	7.45947
A0A0U1RRX6	5-demethoxyubiquinone hydroxylase, mitochondrial (Fragment) OS=Rattus norvegicus OX=10116 GN=Coq7 PE=1 SV=1 - [A0A0U1RRX6_RAT]	3	3	4	32	1.01239	1.16096	1.16439	1.36717	1.16224	0.820727	0.827991	0.873066	0.844246	0.78861	0.918612	1.11827	0.781555	0.868535	1.03081	1.24587	0.82219	0.872021	1.09752	0.735006	0.856472	1.12951	0.827038	1.4159	0.974888	1.15116	1.01516	1.04716	1.0282	0.922522	1.01134	0.831954	0.856231	0.818553	0.974247	1.07183	127.763	10	10.7186	9.59814
Q5PPN5	Tubulin polymerization-promoting protein family member 3 OS=Rattus norvegicus OX=10116 GN=Tppp3 PE=2 SV=1 - [TPPP3_RAT]	1	2	5	15	1.78878	0.995681	1.04118	1.04559	0.943875	0.506987	1.68485	0.610185	0.709627	0.624893	1.10054	1.45041	0.743726	0.703124	1.43956	1.07628	0.779421	0.986004	1.21456	0.711731	0.600204	0.976524	0.727558	1.1456	1.11716	1.31203	0.557432	0.915188	0.728781	2.00879	1.29319	0.680007	0.844915	0.64251	0.995081	0.874527	79.31	4	18.9677	9.11475
G3V9Z3	Amine oxidase OS=Rattus norvegicus OX=10116 GN=Maoa PE=1 SV=1 - [G3V9Z3_RAT]	3	15	20	184	0.456199	0.995924	0.924999	0.638607	0.862701	0.752299	1.01347	2.13466	1.6729	1.25002	1.64631	0.576681	0.94265	1.40438	0.660628	1.54587	0.831084	0.869565	1.29736	1.50108	0.886204	0.588586	1.62797	0.821431	0.886995	0.579688	0.645	0.848493	0.793426	0.406092	0.580295	1.30083	0.849896	1.37463	0.974452	1.35925	903.72	59	59.4827	7.92822
P62959	Histidine triad nucleotide-binding protein 1 OS=Rattus norvegicus OX=10116 GN=Hint1 PE=1 SV=5 - [HINT1_RAT]	2	3	6	67	2.08021	0.874585	1.00654	1.08846	0.953497	0.697915	1.06843	0.5454	0.579108	0.591694	0.844948	1.63607	0.532933	0.740268	1.67997	0.854612	0.60483	1.0414	1.07311	0.736209	0.547086	0.903639	0.658628	1.50894	1.07329	1.34233	0.740571	1.17735	0.776245	1.87941	1.86599	0.857981	0.72254	0.490274	1.2108	1.00244	307.887	16	13.7681	6.87354
M0R629	Adenylosuccinate synthetase isozyme 1 OS=Rattus norvegicus OX=10116 GN=Adssl1 PE=1 SV=1 - [M0R629_RAT]	1	7	12	53	0.73034	0.879469	1.15331	0.651498	1.24612	1.09755	1.03611	1.28599	1.15879	1.39012	1.09758	0.761891	1.20901	1.0535	0.684618	0.907233	1.33939	0.999529	1.19828	1.32357	1.39349	1.06293	1.14217	0.622142	1.0898	0.731183	1.15406	0.775492	1.18851	0.660862	0.959226	0.997858	1.11372	1.16635	1.20229	0.91046	306.419	10	50.2191	8.42627
A0A0G2K6H2	Maleylacetoacetate isomerase OS=Rattus norvegicus OX=10116 GN=Gstz1 PE=1 SV=1 - [A0A0G2K6H2_RAT]	2	1	7	26		1.20869				0.991384				1.00516				0.963877				1.25262				0.826717				0.890753				0.96782				0.971955			88.8767	7	23.8475	7.76709
P46462	Transitional endoplasmic reticulum ATPase OS=Rattus norvegicus OX=10116 GN=Vcp PE=1 SV=3 - [TERA_RAT]	4	12	23	90	0.786965	0.942384	1.13257	0.871143	0.923727	0.980677	1.14333	1.20925	1.01519	1.00301	0.946033	1.01445	1.08587	1.03672	0.848211	0.986925	1.09287	0.937047	0.865993	1.08327	1.11486	0.996813	1.11347	0.86779	0.86811	0.903744	1.11756	0.981035	1.04963	0.787567	0.885664	1.10579	1.00019	1.08988	0.988945	1.00825	328.91	22	89.2927	5.26221
F1LPV8	Succinate--CoA ligase [GDP-forming] subunit beta, mitochondrial OS=Rattus norvegicus OX=10116 GN=Suclg2 PE=1 SV=2 - [F1LPV8_RAT]	1	8	15	100	0.89489	1.08294	1.11008	0.955511	1.06977	1.1338	0.9577	1.01241	1.07184	1.08725	0.938188	1.04176	1.01778	1.09024	0.840676	0.955446	1.06451	0.971806	0.921418	1.07572	1.10955	1.22892	1.12695	0.950151	1.01513	0.94398	0.973052	0.880405	1.12176	1.011	0.853064	0.893708	0.952677	1.02399	0.922282	1.02996	474.856	26	46.6095	7.7085
Q5XI78	2-oxoglutarate dehydrogenase, mitochondrial OS=Rattus norvegicus OX=10116 GN=Ogdh PE=1 SV=1 - [ODO1_RAT]	2	20	39	320	0.5215	0.84064	1.2177	0.548895	0.935395	1.27705	1.10815	1.35795	1.19122	1.43683	1.03947	0.530475	1.28123	1.19814	0.510595	0.930112	1.2157	1.0113	0.914224	1.43333	1.19453	0.732513	1.24068	0.546141	0.89231	0.492639	1.20461	0.811494	1.0538	0.35835	0.949562	1.21037	1.0997	1.16876	1.13713	0.905086	991.919	70	116.221	6.771
P15651	Short-chain specific acyl-CoA dehydrogenase, mitochondrial OS=Rattus norvegicus OX=10116 GN=Acads PE=1 SV=2 - [ACADS_RAT]	2	9	15	120	0.608174	0.803512	1.16779	0.754349	0.933924	1.11234	0.922581	1.36386	1.27208	1.10818	0.998022	1.21685	1.05885	0.984097	0.741804	1.02066	1.06504	0.984227	1.0465	1.27585	1.18648	0.866476	1.32061	0.916879	0.950738	0.676834	1.14704	0.933319	1.03531	0.746094	0.929266	1.18167	0.930439	1.06573	1.01831	0.962972	561.917	31	44.737	8.27979
P68511	14-3-3 protein eta OS=Rattus norvegicus OX=10116 GN=Ywhah PE=1 SV=2 - [1433F_RAT]	4	5	11	111	1.03015	0.882814	0.768699	1.28463	0.897088	0.88038	1.05455	0.944897	1.0022	1.01436	0.954433	1.04862	1.0053	0.809808	0.805816	1.03188	1.05177	0.85352	0.707527	1.04039	0.792526	0.823585	0.983691	1.2662	1.01674	1.41745	1.02322	1.09852	1.04797	0.813102	0.864596	0.856274	1.09365	0.937106	0.217828	1.181	340.126	27	28.194	4.89404
O55171	Acyl-coenzyme A thioesterase 2, mitochondrial OS=Rattus norvegicus OX=10116 GN=Acot2 PE=1 SV=1 - [ACOT2_RAT]	8	15	19	225	0.734662	1.07428	1.13568	0.808748	0.990188	1.11877	0.803067	1.13016	1.09461	0.916799	1.00037	0.692745	1.13068	0.977778	0.844794	0.787199	0.98741	1.07243	0.918641	1.29589	1.10203	1.18051	1.17443	1.00237	1.07989	0.964004	1.23593	1.08206	0.879272	0.773343	0.791851	1.2841	0.978671	0.991386	1.07407	0.934455	881.537	54	49.6697	7.82568
B2RZ27	SH3 domain binding glutamic acid-rich protein-like 3 OS=Rattus norvegicus OX=10116 GN=Sh3bgrl3 PE=1 SV=1 - [B2RZ27_RAT]	1	1	3	13	1.46197	1.19572	1.19438		0.681772	0.587827	0.771319		0.597221	0.489662	0.982644		0.533483	0.645847	1.91894		0.661297	0.8081	1.04282		0.658336	0.812407	0.632895		0.900763	1.42423	0.780621		0.623768	1.42842	1.07464		0.763302	0.696152	1.35037		56.64	4	10.4703	5.13525
Q4V8H8	EH domain-containing protein 2 OS=Rattus norvegicus OX=10116 GN=Ehd2 PE=1 SV=1 - [EHD2_RAT]	1	6	21	101	0.917615	0.946228	1.06784	0.766782	1.29944	1.26263	0.955155	1.50412	1.08796	1.06549	0.993971	0.47791	1.01772	0.91095	0.797106	1.11032	1.06189	0.924108	0.882064	1.01967	2.41489	1.21592	1.07883	0.646985	1.02757	0.705666	1.15343	0.927733	1.11479	0.58282	0.981026	1.1119	1.18078	1.07404	0.810024	1.01778	307.568	23	61.1988	6.55127
Q499N5	Acyl-CoA synthetase family member 2, mitochondrial OS=Rattus norvegicus OX=10116 GN=Acsf2 PE=2 SV=1 - [ACSF2_RAT]	2	12	21	106	0.773239	0.914476	0.947829	0.519533	1.19434	1.30272	0.85802	1.37181	1.24602	1.70354	0.990757	0.681242	1.31136	1.14131	0.561295	0.821077	1.42769	1.05483	0.994337	1.04953	1.39049	0.97237	1.08565	0.531201	0.962318	0.604002	0.963668	0.78646	1.24517	0.635064	0.860412	1.06438	1.14076	1.25551	0.89026	0.901551	580.489	20	67.8429	8.11865
Q5XIT9	Methylcrotonoyl-CoA carboxylase beta chain, mitochondrial OS=Rattus norvegicus OX=10116 GN=Mccc2 PE=2 SV=1 - [MCCB_RAT]	1	8	14	59	0.542245	0.914652	1.02543	0.706663	0.931037	1.31599	1.13536	1.29234	1.25801	1.60122	1.07278	0.695182	1.17594	1.32014	0.604016	0.860382	1.25318	1.10441	0.893467	1.26674	1.22215	0.989037	1.26768	0.692826	1.02065	0.627926	1.02646	0.813033	1.07505	0.648585	0.779602	1.15089	1.08212	1.34901	1.08854	0.898398	304.487	10	61.4784	8.30908
D3ZLT1	NADH dehydrogenase (Ubiquinone) 1 beta subcomplex, 7 (Predicted) OS=Rattus norvegicus OX=10116 GN=Ndufb7 PE=1 SV=1 - [D3ZLT1_RAT]	1	3	5	43	1.71191	1.34743	0.557692	1.12189	1.1003	0.888277	0.713488	1.30017	0.932129	1.11009	0.874059	0.678779	0.980482	1.01398	0.844149	1.05599	0.900905	0.715459	0.751669	0.693116	0.973428	1.25308	1.01594	0.985435	1.12084	1.54628	1.0376	1.06056	0.911247	0.538731	0.910665	0.877081	0.903397	1.02152	0.375619	1.52017	161.797	11	16.5572	8.45557
P11960	2-oxoisovalerate dehydrogenase subunit alpha, mitochondrial (Fragment) OS=Rattus norvegicus OX=10116 GN=Bckdha PE=1 SV=1 - [ODBA_RAT]	2	8	14	79	0.843021	1.04367	1.18609	1.16933	0.732309	0.926115	1.08224	0.992412	0.864226	0.983312	0.857632	1.19639	0.986556	0.89133	1.23444	0.769717	0.783116	0.857033	0.836112	0.998955	0.968846	1.16335	1.03612	0.782092	0.986884	1.01158	1.26352	1.12232	0.790098	1.20562	1.32969	1.16568	0.98767	0.850586	1.30242	1.14943	253.118	22	50.1329	7.82568
F1LM47	Succinate--CoA ligase [ADP-forming] subunit beta, mitochondrial OS=Rattus norvegicus OX=10116 GN=Sucla2 PE=1 SV=1 - [F1LM47_RAT]	1	15	20	282	0.615499	0.868594	1.05647	0.581405	1.02822	1.1764	0.927837	1.22553	1.33549	1.37092	1.19442	0.673399	1.19106	1.0879	0.53999	0.889705	1.2216	0.923915	0.949745	1.23853	1.13431	0.916179	1.31834	0.64416	0.916816	0.550228	1.17038	0.809096	1.06144	0.490912	0.77887	1.10836	1.03111	1.15788	0.899492	0.924235	1377.21	69	50.2742	7.69385
Q5U1W6	MICOS complex subunit OS=Rattus norvegicus OX=10116 GN=Apool PE=1 SV=1 - [Q5U1W6_RAT]	1	3	6	33	0.725749	1.21477	1.10069	0.954742	1.32644	2.1475	1.11227	1.52663	1.4113	1.95313	1.03748	0.843367	1.20954	1.51804	0.762716	0.890593	1.12735	1.812	0.938021		1.39733	0.86401	1.31134	1.34496	1.05134	1.44716	0.914685	1.08525	1.27883	0.946854	0.940894	1.37324	1.1239	1.69581	0.863635	0.834999	163.733	8	28.2196	9.01221
P62278	40S ribosomal protein S13 OS=Rattus norvegicus OX=10116 GN=Rps13 PE=1 SV=2 - [RS13_RAT]	3	4	7	31	0.440314	1.01837	1.02356	0.638245	0.696053	1.19303	0.96318	1.19682	1.36288	1.18825	0.996834	0.634287	1.57049	1.19243	0.581721	1.1018	1.5238	1.19574	0.849107	1.30821	1.5092	0.932385	1.15842	0.921073	1.08131	0.83183	1.21267	0.812404	1.0764	0.973375	0.704152	1.07472	1.35288	1.15112	0.971939	0.930461	90.77	8	17.2117	10.5356
P35435	ATP synthase subunit gamma, mitochondrial OS=Rattus norvegicus OX=10116 GN=Atp5f1c PE=1 SV=2 - [ATPG_RAT]	3	6	11	172	0.555617	0.928152	0.926657	0.65468	1.00003	1.23768	0.945975	1.25256	1.22729	1.34882	1.01949	0.678331	1.21697	1.19574	0.533169	1.08665	1.15679	1.03582	0.883713	1.18158	1.30117	0.949575	1.19815	0.792815	0.96768	0.735504	1.06516	0.850159	1.0414	0.567378	0.798006	1.10001	1.02684	1.19981	0.816148	0.900812	735.116	36	30.1717	8.83643
A0A0H2UI21	Carnitine O-acetyltransferase OS=Rattus norvegicus OX=10116 GN=Crat PE=1 SV=1 - [A0A0H2UI21_RAT]	2	10	22	86	0.73328	0.851279	1.12997	0.557141	0.952688	1.26527	0.88525	1.26737	1.21189	1.22921	1.1784	0.509765	1.3569	1.17702	0.693558	0.890509	1.08724	1.13936	1.00384	1.40682	1.193	0.891136	1.13083	0.669405	0.893139	0.476988	1.24747	0.845979	0.993211	0.416989	0.870157	1.255	0.993057	1.2776	1.27453	0.897288	328.302	20	70.9683	8.20654
A0A0G2K911	NSFL1 cofactor p47 OS=Rattus norvegicus OX=10116 GN=Nsfl1c PE=1 SV=1 - [A0A0G2K911_RAT]	2	6	10	31	1.41728	1.13148	1.02456	1.075	0.915081	0.870363	0.977032	0.787254	0.914129	0.884423	0.918759	1.21389	0.8638	1.13771	1.50159	0.976999	0.738588	1.07157	0.925496	0.766284	1.10556	1.37128	0.746756	1.22348	1.14431	1.42866	1.01109	1.11306	0.899935	2.0513	1.54874	0.740088	0.883419	0.935058	1.22015	1.0872	135.886	6	37.2269	5.51611
Q7M0E3	Destrin OS=Rattus norvegicus OX=10116 GN=Dstn PE=1 SV=3 - [DEST_RAT]	2	2	5	22	0.763928	0.956611	0.802273	0.925316	0.70962	0.77037	0.77014	0.838971	0.914533	0.690828	1.18993	1.43311	0.848586	0.936499	1.1908	1.03661	0.881145	0.990333	0.759172	0.846095	0.89776	0.945465	0.91047	1.23991	0.945646	1.41206	0.550859	1.12254	0.773134	1.67796	1.11291	1.24577	0.933746	1.08178	0.868194	0.912765	151.784	6	18.5215	8.03076
P17209	Myosin light chain 4 OS=Rattus norvegicus OX=10116 GN=Myl4 PE=2 SV=2 - [MYL4_RAT]	3	2	5	100	4.3519	0.314828	0.348553		0.545338	0.172611	11.0694		0.732739	0.0862988	0.298156		1.10282	0.232918	1.21703		0.435647	2.15765	0.317315		0.251962	1.15407	0.339873		0.851785	0.469529	0.159776		0.242936	1.3286	0.493743		2.14508	0.195822	0.363896		492.174	22	21.2687	5.03369
P13086	Succinate--CoA ligase [ADP/GDP-forming] subunit alpha, mitochondrial OS=Rattus norvegicus OX=10116 GN=Suclg1 PE=2 SV=2 - [SUCA_RAT]	2	6	12	105	0.600518	0.798496	1.1903	0.717758	0.812917	1.14938	0.997765	1.08669	1.20354	1.2264	0.971664	1.17807	1.17426	1.13202	0.722912	0.896171	1.20698	1.03877	1.13507	1.07439	1.09733	0.736391	1.10568	0.956217	0.82746	0.690855	0.961319	0.822583	1.00119	1.02378	0.777735	1.20404	1.01919	1.0819	0.835515	0.927328	400.53	23	36.125	9.48096
B2RZ79	Iron-sulfur cluster assembly enzyme OS=Rattus norvegicus OX=10116 GN=Iscu PE=1 SV=1 - [B2RZ79_RAT]	1	3	6	26	1.356	1.04586	0.914737	1.36868	0.892477	0.693129	0.982119	0.918154	0.882088	0.573331	1.11544	1.36643	0.766585	0.868689	1.7891	1.14403	0.77768	1.04033	1.00301	0.960848	0.700064	0.952597	0.683583	1.44268	0.871823	1.26349	0.888125	1.40145	0.851338	1.91862	1.42938	1.01735	0.848456	0.667481	1.09882	1.15301	102.9	6	17.9556	9.29053
M0RBJ7	Complement C3 OS=Rattus norvegicus OX=10116 GN=C3 PE=1 SV=1 - [M0RBJ7_RAT]	3	24	50	203	0.839987	0.771461	0.848299	0.705168	0.680399	1.47604	0.591955	1.31385	1.33922	0.767444	1.21658	0.513592	1.36284	1.32178	0.55814	0.857107	1.47792	1.14522	1.37873	1.35993	1.4867	0.862757	1.27294	0.693627	1.58297	0.688072	1.03457	0.927083	0.624986	0.549455	0.454798	1.44338	1.47745	1.35944	0.925442	0.674373	927.578	35	186.118	6.46826
P23965	Enoyl-CoA delta isomerase 1, mitochondrial OS=Rattus norvegicus OX=10116 GN=Eci1 PE=1 SV=1 - [ECI1_RAT]	3	9	10	150	0.759182	1.01713	1.24561	0.867815	1.1115	1.04706	0.700566	0.998642	0.974237	1.03957	1.25311	0.795544	1.06872	0.942705	0.624536	1.17947	1.00273	0.941254	1.13216	1.36807	1.12243	0.985506	1.12492	1.56776	1.02679	0.943038	1.15207	1.09592	0.891566	0.712681	0.721255	1.12975	0.933736	1.04503	1.13358	0.888677	584.236	39	32.234	9.53955
P05197	Elongation factor 2 OS=Rattus norvegicus OX=10116 GN=Eef2 PE=1 SV=4 - [EF2_RAT]	1	16	24	182	0.758062	0.930608	1.06066	0.642688	1.09984	1.23821	1.19543	1.21041	1.28432	1.336	0.992274	0.662654	1.36981	1.22385	0.604073	0.974902	1.24414	1.08289	0.978118	1.20491	1.22808	0.923331	1.12071	0.752847	1.04203	0.767619	1.16546	0.882294	1.10539	0.665096	0.845375	1.10378	1.12738	1.23566	0.832934	0.890794	820.309	35	95.2229	6.82959
P0DP29	Calmodulin-1 OS=Rattus norvegicus OX=10116 GN=Calm1 PE=1 SV=1 - [CALM1_RAT]	3	1	6	53	1.4596	0.994522	0.919957		1.77237	0.792883	0.863241		0.616739	0.669862	0.72429		0.480518	0.778173	1.9476		0.33729	0.800057	0.834905		1.5707	1.20265	0.758265		0.817108	1.25276	1.34681		0.761049	1.13593	1.95225		0.951074	0.704027	1.12249		83.2122	15	16.8268	4.22119
D3Z9R8	6.8 kDa mitochondrial proteolipid OS=Rattus norvegicus OX=10116 GN=Mp68 PE=1 SV=1 - [68MP_RAT]	1	2	3	26	0.558091	1.19873	1.08554		1.48753	1.079	0.826397		1.06249	1.12858	0.758787		0.780587	1.46253	0.615855		0.702402	1.57864	0.867923		1.78115	1.09458	0.956508		0.738732	1.18957	1.58831		0.877421	0.926284	0.925937		1.02677	0.932657	0.735096		54.75	4	6.90965	9.92041
D4A830	Pyrophosphatase (inorganic) 2 OS=Rattus norvegicus OX=10116 GN=Ppa2 PE=1 SV=2 - [D4A830_RAT]	1	4	8	37	0.982559		0.97785	1.12533	0.83362		1.23574	1.10235	1.21911		1.05571	1.21463	1.18454		1.3051	1.05623	0.77426		0.855163	1.09142	1.05248		0.940522	1.04467	1.26715		0.912595	1.16354	1.16055		1.54749	1.04053	0.955359		1.20692	1.10533	127.562	7	35.0244	6.52197
D4ACV3	Histone H2A OS=Rattus norvegicus OX=10116 GN=Hist2h2ac PE=3 SV=2 - [D4ACV3_RAT]	18	1	5	60	0.890762	0.921341	1.16171	0.738582	0.755145	0.984285	0.721179	1.03034	0.922506	1.33426	0.639623	1.05915	1.41163	1.19476	0.834544	1.11774	1.65963	1.12369	1.09691	1.14044	1.18021	0.827855	0.819329	1.36166	1.23352	0.940264	0.806005	0.654656	1.10479	0.700436	0.910894	1.19885	1.2922	1.40747	1.14801	0.8133	258.592	16	13.6366	10.8579
P38983	40S ribosomal protein SA OS=Rattus norvegicus OX=10116 GN=Rpsa PE=1 SV=3 - [RSSA_RAT]	1	3	7	16	1.41355		0.837601	0.958314	1.02068		0.919288	1.0771	0.942089		0.61833	0.999643	1.10039		0.963485	0.822221	1.08929		0.639515	1.20958	1.0723		0.896252	0.712287	1.24812		0.909409	0.918224	0.89126		0.870058	0.992966	1.19015		0.778079	1.06582	114.29	3	32.8034	4.86865
Q5U2U8	Bcl2-associated athanogene 3 OS=Rattus norvegicus OX=10116 GN=Bag3 PE=1 SV=1 - [Q5U2U8_RAT]	1	10	20	108	1.73328	1.12617	0.916336	1.2827	1.14695	0.640128	0.952701	0.627797	0.715012	0.614457	0.882732	1.15321	0.557317	0.843315	1.74605	1.00892	0.634653	0.997543	1.01046	0.77172	0.654272	1.06384	0.700077	1.13584	1.13662	1.6331	0.871802	1.32619	0.887439	2.00242	1.73807	0.877737	0.782088	0.62107	0.925459	1.12631	363.331	27	61.453	7.03467
G3V6P2	Dihydrolipoamide S-succinyltransferase (E2 component of 2-oxo-glutarate complex), isoform CRA_a OS=Rattus norvegicus OX=10116 GN=Dlst PE=1 SV=1 - [G3V6P2_RAT]	2	8	18	135	0.7749	0.899145	0.936921	1.09883	1.0801	0.922675	0.916419	1.18252	0.988913	0.825842	0.963911	1.02372	0.722869	0.822668	1.03698	0.913977	0.547639	0.753537	0.861781	0.718592	1.6718	1.28937	1.02463	1.02395	0.971219	1.04855	1.26908	1.10494	0.948737	1.05623	0.93461	0.67145	1.01737	0.814736	0.94998	1.11529	396.091	34	48.8684	8.70459
Q62651	Delta(3,5)-Delta(2,4)-dienoyl-CoA isomerase, mitochondrial OS=Rattus norvegicus OX=10116 GN=Ech1 PE=1 SV=2 - [ECH1_RAT]	1	9	11	148	0.952256	1.17727	1.01131	1.25238	0.961503	1.00124	0.821626	0.954338	0.853667	0.968485	1.04488	1.00713	0.87902	0.938102	0.770331	1.06357	0.909517	0.88763	0.938647	1.00376	0.955873	1.18318	1.05657	1.20496	1.06676	1.09865	1.06936	1.09571	0.936384	0.875935	0.502624	0.908883	0.840831	0.932427	0.738797	1.00701	547.699	43	36.1484	7.98682
P05964	Protein S100-A6 OS=Rattus norvegicus OX=10116 GN=S100a6 PE=1 SV=3 - [S10A6_RAT]	1	3	3	40	1.63772	1.04768	1.08907	1.09091	0.888589	0.734502	1.77494	0.942128	0.831902	0.84517	1.1894	0.972418	1.04562	0.958811	1.16548	1.148	1.0461	0.932178	1.45608	0.873193	0.845279	0.976001	1.22878	1.36533	1.01219	1.11191	1.17033	1.34713	0.948317	0.645637	2.16341	0.910536	1.11312	1.16856	0.864048	1.04839	215.873	10	10.0283	5.47803
D3ZQL7	Similar to 25 kDa brain-specific protein (P25-alpha) (Predicted), isoform CRA_a OS=Rattus norvegicus OX=10116 GN=Tppp PE=1 SV=1 - [D3ZQL7_RAT]	2	2	7	26	1.0948	1.07161	1.30147	1.21182	0.856936	0.749256	0.97327	0.797714	0.629638	0.812912	0.977895	1.97785	0.686958	0.83034	1.4202	0.977842	0.894129	0.875801	1.44935	0.944631	0.661591	0.763872	0.766052	1.23473	0.882929	0.998257	0.607471	0.865597	0.789857	2.48298	1.48504	1.14804	0.792221	0.76302	1.1733	0.78772	112.49	6	23.5321	9.40771
A0A0G2K5P5	Myomesin 1 OS=Rattus norvegicus OX=10116 GN=Myom1 PE=1 SV=1 - [A0A0G2K5P5_RAT]	1	23	49	251	0.65248	0.970804	1.08268	0.558943	0.890739	1.31909	0.955442	1.23746	1.31631	1.52859	0.970109	0.606141	1.41273	1.3094	0.516475	0.819232	1.34598	1.21287	0.86335	1.07969	1.34565	0.764615	1.0093	0.486401	0.791912	0.349143	1.20719	0.760715	1.10472	0.502549	0.814833	1.29467	1.35908	1.42426	0.981958	0.969273	750.328	46	187.486	6.48096
P01161	Natriuretic peptides A OS=Rattus norvegicus OX=10116 GN=Nppa PE=1 SV=1 - [ANF_RAT]	1	3	8	39	2.79111	0.247697	0.200582	0.144838	0.4945	0.357473	18.9088	0.787422	0.839643	0.129706	0.212838	1.36493	0.660398	0.197499	0.921409	0.219019	0.369147	0.986656	0.261479	0.333938	0.200017	0.938348	0.313509	0.0944471	0.485635	0.300236	0.243161	3.03734	0.187937	0.905688	0.301195	0.165945	1.18321	0.28048	0.351253	0.112184	106.691	10	16.5453	7.29834
P31232	Transgelin OS=Rattus norvegicus OX=10116 GN=Tagln PE=1 SV=2 - [TAGL_RAT]	2	4	6	26	1.04327	1.1521	0.565467	1.1263	0.505475	1.21641	1.0934	0.782048	0.71942	0.347365	0.677516	1.23809	1.03425	1.58579	0.667725	1.15275	0.734948	0.514784	1.36485	1.54742	0.885673	1.00125	0.696916	1.09733	0.632829	0.660935	0.470181	0.860005	1.04365	1.23941	1.36686	1.43584	1.04524	2.09773	1.1543	0.901613	160.027	6	22.5883	8.83643
Q6PEC1	Tubulin-specific chaperone A OS=Rattus norvegicus OX=10116 GN=Tbca PE=1 SV=1 - [TBCA_RAT]	2	1	3	12	1.62042	1.10949	0.962128	1.37696	1.02725	0.734313	0.730236	0.535373	0.630123	0.586382	0.914517	1.24827	0.570363	0.833403	1.53201	1.03506	0.57501	1.13349	1.1159	0.645116	0.659346	1.15303	0.536406	1.59077	0.932216	1.69026	0.659456	1.19765	0.787585	2.00492	1.39154	0.809224	0.751076	0.668688	1.38089	1.01168	62.24	3	12.7357	5.46533
P19132	Ferritin heavy chain OS=Rattus norvegicus OX=10116 GN=Fth1 PE=1 SV=3 - [FRIH_RAT]	2	4	5	47	1.77066	1.39749	1.07183	1.22636	1.24969	0.884851	1.55158	0.748934	0.842866	1.15161	1.25647	1.3019	0.893933	1.0375	1.29094	0.880999	0.978096	1.12478	0.904306	0.694651	0.994066	1.04889	0.900799	0.881645	0.898066	1.14944	0.887244	1.18349	1.46966	1.62923	2.83919	1.00816	1.09883	1.04388	1.05082	1.27257	146.427	10	21.1133	6.30322
P10818	Cytochrome c oxidase subunit 6A1, mitochondrial OS=Rattus norvegicus OX=10116 GN=Cox6a1 PE=1 SV=2 - [CX6A1_RAT]	1	1	3	11			1.74492				1.20662				1.13056				2.85292				0.923554				1.52907				1.80567				5.65721				3.16291		60.94	5	12.2933	9.31982
Q5I0M1	Apolipoprotein H OS=Rattus norvegicus OX=10116 GN=Apoh PE=1 SV=1 - [Q5I0M1_RAT]	2	4	9	79	1.914		0.940971	1.51025	1.16826		1.01475	0.421074	0.745485		0.924591	1.63757	0.760339		1.84784	1.1671	0.788948		1.34813	0.293943	0.980967		0.663218	1.43609	1.58638		0.81426	1.47157	0.784232		1.76591	0.627049	0.911847		1.04895	0.805346	201.23	23	38.4317	8.20654
P62963	Profilin-1 OS=Rattus norvegicus OX=10116 GN=Pfn1 PE=1 SV=2 - [PROF1_RAT]	2	5	5	67	1.12568	0.826324	1.26286	0.928328	0.984885	0.822432	0.970163	0.963371	0.866781	0.872488	1.02807	1.21921	0.919408	0.936795	1.08947	1.00383	1.04099	0.961733	1.14478	1.24242	0.844449	0.725948	1.02703	1.09625	0.980216	0.915163	0.905939	0.933726	0.943829	1.43799	1.10619	1.09272	0.972447	0.956052	1.46952	1.00983	434.541	18	14.9475	8.27979
Q5PQZ9	NADH dehydrogenase [ubiquinone] 1 subunit C2 OS=Rattus norvegicus OX=10116 GN=Ndufc2 PE=1 SV=1 - [Q5PQZ9_RAT]	1	4	7	90	1.0339	1.03733	0.898992	0.976093	1.11789	1.09393	1.05144	1.07307	0.878353	1.0764	1.0815	1.01802	0.92535	1.07975	0.975048	1.31585	0.889527	0.945265	1.05152	1.16475	0.955977	1.01346	0.989596	1.8267	0.997759	1.22401	0.890137	1.04545	0.967466	0.876585	0.948418	0.957687	0.90326	1.05608	1.14158	1.10023	264.6	24	14.3493	9.39307
F1M944	Calsequestrin OS=Rattus norvegicus OX=10116 GN=Casq2 PE=1 SV=2 - [F1M944_RAT]	2	13	19	207	0.717324	1.30854	0.82923	0.824518	0.892342	1.27439	1.18592	1.34644	1.23224	1.35447	1.0109	0.772178	1.2893	1.049	0.751294	0.671023	1.09492	0.903642	0.652568	1.11146	1.13938	1.44431	1.46797	0.525316	1.25093	0.856115	1.17786	0.840124	1.37011	0.558013	0.796086	0.970206	1.09329	1.10222	0.529284	1.16391	755.289	50	49.372	4.31006
D4ADD7	Glutaredoxin 5 OS=Rattus norvegicus OX=10116 GN=Glrx5 PE=1 SV=1 - [D4ADD7_RAT]	1	1	4	16	0.637787	0.871828		1.2461	0.577502	0.863422		0.854905	0.935653	0.829251		1.29117	0.652522	0.962865		0.984531	0.54233	0.809424		0.670245	0.784157	1.08185		1.45901	0.96121	1.51617		1.22093	0.885212	1.44438		0.831748	0.791328	0.671941		1.2708	105.306	5	16.4215	7.28369
P04785	Protein disulfide-isomerase OS=Rattus norvegicus OX=10116 GN=P4hb PE=1 SV=2 - [PDIA1_RAT]	1	8	17	64	1.36155	1.09247	1.02992	1.09714	1.02437	1.01776	1.19617	0.848545	1.0703	0.924867	1.09446	0.949559	0.947463	1.01043	1.33202	1.20026	1.00004	0.904165	0.95521	0.90794	0.908947	1.27036	1.00941	1.09909	1.01713	1.18905	1.08628	1.10357	1.06115	1.11575	0.978081	0.890105	0.963088	1.01016	0.89	1.0443	238.984	14	56.9157	4.93213
Q5U211	Sorting nexin-3 OS=Rattus norvegicus OX=10116 GN=Snx3 PE=1 SV=1 - [SNX3_RAT]	1	1	5	20				1.34326				0.839654				1.57474				1.11844				0.951216				1.82282				1.10437				1.0874				0.954721	53.21	4	18.7508	8.66064
A0A0G2K4G3	NEDD8 OS=Rattus norvegicus OX=10116 GN=Nedd8 PE=1 SV=1 - [A0A0G2K4G3_RAT]	2	2	2	10	1.54341				1.1116				0.94353				0.591357				0.757269				0.743406				0.954743				0.955406				0.93526				102.76	2	8.9828	5.47803
D4A6X4	Acylphosphatase OS=Rattus norvegicus OX=10116 GN=Acyp1 PE=1 SV=1 - [D4A6X4_RAT]	1	1	3	4		0.786011		1.05922		0.994871		1.07809		0.629977		1.35573		0.976162		0.979353		1.12078		1.01108		0.855184		1.05899		0.96202		1.03198		1.91589		1.11339		0.873752		1.08517	50.66	1	11.3048	9.30518
Q5XIM5	Protein CDV3 homolog OS=Rattus norvegicus OX=10116 GN=Cdv3 PE=1 SV=1 - [CDV3_RAT]	3	3	6	31	1.4925	0.67597	0.695076	1.28266	1.09167	0.389249	0.489649	0.605478	0.560714		1.03248	1.20741	0.467175	0.634026	1.40305	1.05794	0.509558	0.768654	0.874778	0.773558	0.466982	0.63586	0.447662	1.4502	0.878331	1.72907	0.413533	1.43259	0.65627	1.75305	1.24916	0.711468	0.550623	0.519133	1.24239	1.0243	117.826	10	24.2957	5.85889
A0A0G2K459	Mitochondrial carrier 2 OS=Rattus norvegicus OX=10116 GN=Mtch2 PE=1 SV=1 - [A0A0G2K459_RAT]	2	4	9	40	0.563894	0.911906	1.24504	0.737572	0.69154	1.14246	1.09758	1.57956	1.08468	1.44941	1.26404	0.641355	1.10074	1.08341	0.808174	0.993533	1.24884	1.41675	1.33013	1.07684	1.01813	0.855427	1.51235	0.99932	0.827748	0.783672	1.22215	1.17706	0.9441	0.833971	1.05172	1.86303	1.08578	1.14908	0.938022	1.12526	133.622	7	33.7355	8.93896
Q3T1J1	Eukaryotic translation initiation factor 5A-1 OS=Rattus norvegicus OX=10116 GN=Eif5a PE=1 SV=3 - [IF5A1_RAT]	2	4	5	29	1.57863	1.24018	0.890352	1.21039	0.902143	0.774887	1.01214	0.746583	0.836065	0.742521	0.876637	1.15749	0.623337	0.821986	1.56765	0.879429	0.797366	0.912894	0.829	0.871939	0.735602	1.20672	0.785771	0.892987	1.01083	1.1729	1.02475	1.20625	1.02863	1.56959	1.43844	0.88898	0.883037	0.734256	0.984365	1.10861	178.51	7	16.8214	5.23682
D4A4L5	Iron-sulfur cluster assembly 2 OS=Rattus norvegicus OX=10116 GN=Isca2 PE=1 SV=1 - [D4A4L5_RAT]	1	4	4	18	1.96786	1.2121		1.34567	1.13374	0.697176		0.792314	0.639731	0.782044		1.2426	0.545818	0.801557		0.992158	0.570844	1.0326		0.976915	0.56748	0.9788		1.33606	1.15128	1.40552		1.20399	0.923567	1.66769		0.898327	0.769166	0.719134		1.23026	108.913	4	16.6694	5.2749
P04264	SWISS-PROT:P04264 Tax_Id=9606 Gene_Symbol=KRT1 Keratin, type II cytoskeletal 1	20	17	18	90	0.435125	0.928053	0.469482	0.762883	1.08277	0.809991	0.993372	0.914183	1.84129	1.09563	1.01925	1.22406	0.645664	0.463963	1.29796	0.957703	0.4243	0.340127	1.83294	0.495519	0.346597	1.60023	1.75332	1.16196	6.5185	0.559266	0.530066	1.21087	0.347181	1.37577	0.412659	0.85664	0.493635	1.5147	1.54384	0.428715	405.53	22	65.978	8.11865
P08461	Dihydrolipoyllysine-residue acetyltransferase component of pyruvate dehydrogenase complex, mitochondrial OS=Rattus norvegicus OX=10116 GN=Dlat PE=1 SV=3 - [ODP2_RAT]	1	14	19	293	0.808992	0.948018	1.07252	0.719987	0.958467	1.10168	0.996931	1.20941	1.18999	1.12513	1.06188	0.828257	1.08619	1.08151	0.79161	0.937412	1.1373	0.96308	1.01847	1.22583	1.06936	1.03208	1.20473	0.693158	0.930475	0.67888	1.08187	0.83093	1.0568	0.784596	0.861165	1.12109	0.985518	1.1005	0.940558	1.00116	1292.11	72	67.1234	8.52881
P34058	Heat shock protein HSP 90-beta OS=Rattus norvegicus OX=10116 GN=Hsp90ab1 PE=1 SV=4 - [HS90B_RAT]	2	14	27	228	0.741571	0.981614	0.935201	0.657586	1.01168	1.20889	1.18752	1.18809	1.24138	1.31546	1.06826	0.595076	1.23853	1.16584	0.65027	0.900501	1.23231	1.02535	0.960539	1.21057	1.28256	1.011	1.22352	0.71529	0.922398	0.767143	1.06113	0.843742	1.11078	0.684499	0.866618	0.9858	1.08991	1.1632	0.817474	0.924062	958.412	51	83.2291	5.03369
A0A0G2JUA5	AHNAK nucleoprotein OS=Rattus norvegicus OX=10116 GN=Ahnak PE=1 SV=1 - [A0A0G2JUA5_RAT]	2	13	43	148	1.02692	0.83046	1.10705	0.885572	1.0202	0.883123	1.26487	0.787554	0.950652	0.828878	1.07022	1.03352	0.813608	0.925938	1.38728	0.883346	0.871205	1.15605	0.942	0.816575	0.817648	0.969963	0.95464	0.809861	0.760347	0.892388	1.09421	1.14465	0.805728	1.67571	1.92442	1.0725	1.00121	0.904846	1.00052	0.940662	444.644	36	580.754	6.13818
Q8VIF7	Methanethiol oxidase OS=Rattus norvegicus OX=10116 GN=Selenbp1 PE=1 SV=1 - [SBP1_RAT]	2	5	13	66	0.786155	1.06482	0.953167	0.767296	1.07904	0.939173	1.26354	1.26181	1.07818	1.18826	1.07885	1.0087	1.10025	0.96962	0.946582	0.87609	1.19293	1.14862	0.955333	1.21011	1.2112	1.06711	1.06537	0.677142	1.13195	0.638805	1.16287	0.951151	1.25498	0.820298	1.01851	1.35481	1.17181	1.04898	0.904964	1.06969	244.479	15	52.4985	6.56592
Q63798	Proteasome activator complex subunit 2 OS=Rattus norvegicus OX=10116 GN=Psme2 PE=2 SV=3 - [PSME2_RAT]	1	4	6	26	1.17106	1.15348	1.23247	1.66952	0.666175	0.935271	0.623094	1.36942	0.914618	0.64662	1.83087	0.738621	1.05591	0.915411	1.20599	2.02677	1.15493	0.888195	1.45199	1.18357	1.04586	1.36123	1.55045	1.51336	0.806355	1.28774	1.64322	0.981088	0.573821	0.709823	0.544523	0.751682	0.806752	1.17424	0.557586	1.62868	115.952	8	26.84	5.71924
Q641Z6	EH domain-containing protein 1 OS=Rattus norvegicus OX=10116 GN=Ehd1 PE=1 SV=1 - [EHD1_RAT]	3	7	15	55	1.07799	1.07799	0.951047	1.0153	1.0977	0.925767	0.827421	1.16011	0.976278	0.954492	0.886707	0.629887	0.887532	1.00533	0.91993	0.947336	0.930283	0.866932	0.883987	1.14801	0.988885	1.19274	1.07705	0.837556	1.19795	1.03243	1.06965	0.916372	1.01897	0.651512	1.02253	0.942883	1.07905	1.0987	1.03174	1.27508	270.678	10	60.5646	6.82959
Q712U5	cAMP-regulated phosphoprotein 19 OS=Rattus norvegicus OX=10116 GN=Arpp19 PE=1 SV=3 - [ARP19_RAT]	2	1	2	3				1.99246				0.512165				1.15179				1.30732				0.310418				2.51696				1.57665				0.527905				0.809765	47.7	3	12.2853	9.08545
P02651	Apolipoprotein A-IV OS=Rattus norvegicus OX=10116 GN=Apoa4 PE=1 SV=2 - [APOA4_RAT]	2	10	16	97	2.88829	1.04862	0.634944	1.05191	0.778232	0.853073	0.566101	0.552282	0.449217	0.490488	1.07899	0.916399	0.448267	0.703279	1.73865	0.984023	0.646011	1.01503	1.34469	0.713538	0.650788	0.744498	0.496091	1.75005	2.19004	2.5518	0.627277	1.46202	0.563869	2.00036	0.766795	0.7009	0.871264	0.553958	1.2163	0.693883	480.891	25	44.4287	5.22412
F1LWG8	Sarcalumenin OS=Rattus norvegicus OX=10116 GN=Srl PE=1 SV=3 - [F1LWG8_RAT]	1	12	23	257	0.801731	0.87854	0.911856	0.799762	1.06237	1.19504	1.11066	1.15329	0.973192	1.2288	0.873777	0.825826	1.01764	1.06275	0.783347	0.794828	1.167	0.928293	0.835458	1.13309	1.06801	1.07668	1.02228	0.636253	1.01808	0.926059	1.04998	0.902688	1.18724	0.768823	0.960594	1.0166	1.07463	1.00841	0.844887	1.11665	852.907	62	98.3034	4.43701
P18418	Calreticulin OS=Rattus norvegicus OX=10116 GN=Calr PE=1 SV=1 - [CALR_RAT]	1	4	15	71	1.42555	1.2666	0.883559	1.17128	0.898912	0.92235	1.09849	0.86593	0.998864	0.796201	0.751674	0.873563	0.799499	0.962972	1.21418	0.881264	0.902643	1.0036	0.738621	0.603805	0.891183	1.20877	0.918716	0.688988	1.14723	1.32973	0.937545	1.17772	0.890661	1.3082	0.96354	0.863117	0.975576	0.937328	0.786401	1.27688	166.693	17	47.9658	4.48779
B5DEN5	Eukaryotic translation elongation factor 1 beta 2 OS=Rattus norvegicus OX=10116 GN=Eef1b2 PE=1 SV=1 - [B5DEN5_RAT]	1	3	5	9			0.974203				1.01331				0.836615				1.4019				0.863446				0.80086				0.974449				1.28972				1.1809		52.2535	3	24.6603	4.71631
D3ZZ21	NADH dehydrogenase (Ubiquinone) 1 beta subcomplex, 6 (Predicted) OS=Rattus norvegicus OX=10116 GN=Ndufb6 PE=1 SV=1 - [D3ZZ21_RAT]	1	2	5	20	0.49471			0.798011	0.900587			0.96439	1.13125			0.972567	1.08577			1.36564	1.07518			1.25655	0.9132			1.72023	0.799267			0.799024	0.88338			1.02351	0.940772			0.938816	55.94	4	15.6283	10.0376
Q63228	Glia maturation factor beta OS=Rattus norvegicus OX=10116 GN=Gmfb PE=1 SV=2 - [GMFB_RAT]	1	2	3	9		1.20065	1.00691	1.59873		0.837019	0.804154	0.70581		0.687612	0.922042	0.96909		0.703695	1.37825	1.1175		0.936598	1.01753			1.045	0.794179	1.30999		1.44924	0.907979	1.21118		1.48574	1.24691	0.816677		0.839518	1.22029	1.14676	64.09	3	16.7255	5.43994
Q9WUC4	Copper transport protein ATOX1 OS=Rattus norvegicus OX=10116 GN=Atox1 PE=1 SV=1 - [ATOX1_RAT]	1	1	2	11	1.88036	1.24345	1.10482	1.12112	1.06261	0.735265	0.891902	0.523581	0.458664	0.48978	0.813967	1.50406	0.411955	0.699458	1.71313	0.91573	0.571636	1.01938	0.964911	0.738662	0.498638	0.796892	0.568024	1.32525	0.891376	1.14458	0.685644	1.13619	0.75457	1.77616	1.56022	0.816154	0.689	0.551765	1.37772	0.994477	55.9133	3	7.28769	7.23975
P62836	Ras-related protein Rap-1A OS=Rattus norvegicus OX=10116 GN=Rap1a PE=1 SV=1 - [RAP1A_RAT]	2	2	5	39	0.654281	0.948463	1.1927	0.688615	0.841368	1.17086	1.19623	1.11785	1.20998	1.06315	0.976876	0.605076	1.26927	0.963745	0.766041	0.693391	1.30848	0.842392	0.822786	1.3978	1.28003	0.900643	1.12392	0.657997	0.932637	0.715386	1.06342	0.752897	1.06003	0.612819	0.891328	1.12961	1.19607	1.15015	1.17438	0.933693	173.778	10	20.9737	6.66846
Q5XI73	Rho GDP-dissociation inhibitor 1 OS=Rattus norvegicus OX=10116 GN=Arhgdia PE=1 SV=1 - [GDIR1_RAT]	1	3	5	40	1.33857	1.23876	0.936833	1.00228	0.94409	0.993926	1.13652	1.10379	1.01764	0.97601	0.716958	0.867149	0.837495	0.919612	0.953587	0.965055	1.14011	0.902415	0.775324	1.22148	0.943108	1.16567	0.99455	0.868416	1.09735	1.06739	1.04678	1.04925	0.995608	1.18702	0.98457	1.06669	1.14443	0.966452	0.811369	1.10841	149.844	9	23.3928	5.19873
Q9WUH4	Four and a half LIM domains protein 1 OS=Rattus norvegicus OX=10116 GN=Fhl1 PE=2 SV=1 - [FHL1_RAT]	2	1	7	23	0.506033	0.914342	0.951037		0.745581	1.107	0.980172		1.14803	1.12343	0.97825		1.11341	1.17851	0.734685		1.19024	0.985958	0.871299		0.818913	0.886342	0.996331		0.856078	0.721838	0.868501		0.965583	0.890067	0.72177		1.22683	1.1988	1.07673		137.015	7	31.8819	8.36768
P80432	Cytochrome c oxidase subunit 7C, mitochondrial OS=Rattus norvegicus OX=10116 GN=Cox7c PE=1 SV=2 - [COX7C_RAT]	1	2	5	46	0.551859	0.883408	0.838472	0.934133	1.09258	0.97575	0.810203	0.983621	1.17458	1.09177	1.20235	0.812779	1.07087	1.12435	0.827457	2.04364	1.13871	0.94398	1.74366	1.16818	1.07864	0.890741	1.10256	1.78072	0.920048	0.879387	0.871279	1.12041	1.02704	0.51275	0.755029	1.00721	0.847415	1.01439	0.829124	0.881215	242.92	8	7.36993	11.0044
Q9Z269	Vesicle-associated membrane protein-associated protein B OS=Rattus norvegicus OX=10116 GN=Vapb PE=1 SV=3 - [VAPB_RAT]	1	3	6	31	1.2334	1.08084	1.11222	1.01256	1.12116	0.944435	1.21815	1.08649	0.893465	1.04604	1.04084	0.949293	0.832938	1.15453	1.36922	1.07503	0.992062	0.842387	1.12131	1.35494	0.849752	1.15557	1.0587	0.970683	1.01846	1.32324	1.12392	1.00748	1.09183	1.17308	1.39928	1.10244	0.799528	0.98374	1.43182	1.26075	145.298	8	26.899	7.78174
Q499Q4	Phosphoglucomutase-1 OS=Rattus norvegicus OX=10116 GN=Pgm1 PE=1 SV=2 - [Q499Q4_RAT]	2	11	16	97	0.627012	0.899286	1.03254	0.569005	0.971118	1.37691	1.042	1.50049	1.25224	1.54134	1.15056	0.459596	1.22149	1.21552	0.522673	0.854069	1.28107	1.05079	0.789816	1.32936	1.25378	1.10245	1.3062	0.570719	1.07169	0.639987	1.27105	0.862778	1.1176	0.45816	0.926169	1.32871	1.13436	1.40019	1.03291	0.923446	466.462	19	61.3516	6.56592
P0DN35	NADH dehydrogenase [ubiquinone] 1 beta subcomplex subunit 1 OS=Rattus norvegicus OX=10116 GN=Ndufb1 PE=3 SV=1 - [NDUB1_RAT]	1	1	2	16	1.20848	0.872121		1.20027	1.02441	0.774488		0.728942	0.667977	0.880126		1.3316	0.650643	0.813737		1.43303	0.722081	1.24581		1.09025	0.66277	0.604712		2.19792	0.784669	1.34751		0.891075	0.787534	1.1236		0.917293	0.859783	0.828552		0.974685	54.2146	6	6.99362	8.5874
F7EPH4	Pyrophosphatase (inorganic) 1 OS=Rattus norvegicus OX=10116 GN=Ppa1 PE=1 SV=1 - [F7EPH4_RAT]	2	2	6	20	1.23753	1.13825	1.02004		0.811531	0.894768	0.989861		0.71655	0.795472	0.906529		0.431302	0.903882	1.36524		0.583878	0.949449	0.881057		0.719872	1.05043	1.04812		0.829594	1.03895	1.15745		0.738383	1.08354	1.20889		0.715304	0.91252	0.824135		124.87	8	32.7501	5.46533
D3ZCR3	High mobility group protein B1 pseudogene OS=Rattus norvegicus OX=10116 GN=LOC108349189 PE=4 SV=2 - [D3ZCR3_RAT]	10	1	5	14			0.992135				1.31885				1.18232				1.45659				1.05717				1.02261				0.996711				1.44386				1.23766		63.53	2	24.6621	6.15088
P00761 SWISS-PROT:P00761	Trypsin - Sus scrofa (Pig). - [TRYP_PIG]	1	6	6	122	0.856112	0.915518	0.524459	1.14637	1.03333	1.1598	0.939466	1.10584	0.955087	0.865348	0.845879	0.980531	0.922533	0.808021	1.06648	1.50234	0.838956	0.912515	1.03372	0.877632	1.22551	1.72417	1.01518	1.32425	1.09059	1.14318	1.43457	1.37641	0.923037	1.0536	1.22631	0.846881	0.897975	0.884054	1.00076	0.982198	622.61	32	24.3938	7.18115
P51886	Lumican OS=Rattus norvegicus OX=10116 GN=Lum PE=1 SV=1 - [LUM_RAT]	1	6	10	48	1.99809	1.34281	0.841356	0.948193	0.711637	0.737019	1.24747	0.599645	0.743606	0.725817	0.730208	1.37903	0.741088	0.870878	1.52329	0.583062	0.737621	1.08521	0.668761	0.615668	0.614966	1.23153	0.810778	0.843765	1.20568	1.2574	0.57867	1.02607	0.835441	1.71918	1.52906	0.719189	1.07029	0.781516	0.930551	0.865189	202.868	11	38.2546	6.43018
D4A565	NADH dehydrogenase (Ubiquinone) 1 beta subcomplex, 5 (Predicted), isoform CRA_b OS=Rattus norvegicus OX=10116 GN=Ndufb5 PE=1 SV=1 - [D4A565_RAT]	1	3	8	56	0.556508	0.795981	0.769526	0.929723	0.926591	1.04042	0.936372	1.08451	1.46354	1.07297	1.09679	0.896097	1.04205	1.14596	0.84055	1.48802	0.907608	0.897869	1.06976	1.08564	0.930645	0.958322	0.947051	1.58005	0.898881	1.0476	0.942535	1.05977	0.931556	0.8092	0.885623	1.03035	1.02031	1.0468	0.769684	1.15419	165.461	15	21.6505	9.46631
A0A0U1RRV7	RCG61099, isoform CRA_b OS=Rattus norvegicus OX=10116 GN=Srsf3 PE=1 SV=1 - [A0A0U1RRV7_RAT]	2	1	3	11	1.25428				0.921881				0.829358				0.895783				0.889841				0.838465				0.942445				0.952264				1.05694				40.96	2	14.1942	10.0815
Q5I0P2	Glycine cleavage system H protein, mitochondrial OS=Rattus norvegicus OX=10116 GN=Gcsh PE=2 SV=1 - [GCSH_RAT]	2	1	4	14	1.1496	1.00973	0.871389	1.31499	0.721062	0.650776	0.962181	0.675915	0.592944	0.729804	0.683446	1.17727	0.517234	0.798389	1.6991	0.810566	0.562808	0.910704	0.615565	0.581339	0.549502	0.91636	0.675461	1.413	1.18594	1.52036	0.805927	1.19995	0.910624	1.45177	1.37139	0.737431	0.647315	0.732859	0.854874	1.33469	64.0267	4	18.4734	5.0083
P06685	Sodium/potassium-transporting ATPase subunit alpha-1 OS=Rattus norvegicus OX=10116 GN=Atp1a1 PE=1 SV=1 - [AT1A1_RAT]	7	10	25	161	0.595438	0.863396	1.02688	0.562113	0.996006	1.21239	1.12203	1.43825	1.30636	1.58813	0.999492	0.569932	1.43865	1.13497	0.396766	0.886601	1.39436	1.11663	0.981767	1.25339	1.35967	0.816427	1.05792	0.610152	1.04048	0.565734	1.20806	0.83762	1.26326	0.446294	0.968832	1.12478	1.1868	1.23205	0.767478	0.87077	620.615	38	112.982	5.45264
P04906	Glutathione S-transferase P OS=Rattus norvegicus OX=10116 GN=Gstp1 PE=1 SV=2 - [GSTP1_RAT]	1	4	6	27	0.735046			0.889385	1.11512			1.07447	1.30886			0.866453	1.37331			1.12935	1.03414			1.07837	1.23231			1.25458	1.03304			0.963173	1.0264			0.924663	1.09528			0.985248	92.1329	8	23.4241	7.35693
D3ZFQ8	Cytochrome c-1 OS=Rattus norvegicus OX=10116 GN=Cyc1 PE=1 SV=3 - [D3ZFQ8_RAT]	1	5	8	154	0.950158	1.11664	0.881074	0.925863	1.11058	1.0739	0.983357	1.10501	1.12974	1.19739	1.03193	0.793558	1.07977	1.14649	0.90281	0.926949	1.01346	1.06971	0.819581	1.26686	1.02916	1.00164	1.02049	1.05305	1.17067	1.14818	0.965817	0.977169	1.12878	0.811356	0.902805	1.01635	0.922323	1.05409	1.08225	1.12487	422.857	41	35.412	9.26123
P02764	Alpha-1-acid glycoprotein OS=Rattus norvegicus OX=10116 GN=Orm1 PE=2 SV=1 - [A1AG_RAT]	2	6	9	51	2.53514	0.822727	0.478483	1.25402	0.274016	0.392242	0.226204	0.688291	1.73308	0.255637	1.59583	0.376949	0.351788	0.871979	1.6244	0.919056	0.474082	1.32105	1.1393	0.764698	0.532388	1.03051	0.639342	0.935031	2.63665	2.66742	1.00042	1.3725	0.271513	1.77315	0.425382	1.22631	1.82846	0.628954	0.742412	0.818922	106.961	13	23.5601	5.90967
P35171	Cytochrome c oxidase subunit 7A2, mitochondrial OS=Rattus norvegicus OX=10116 GN=Cox7a2 PE=1 SV=1 - [CX7A2_RAT]	1	2	3	67	0.607798	0.812497	0.701145	1.01591	1.08716	1.05933	0.925855	0.95418	1.07326	1.03577	1.25798	1.13148	0.824325	1.06949	0.818869	1.62133	0.947157	1.00363	1.26221	0.93338	0.913629	1.08016	1.04763	1.94828	0.973654	1.24608	1.10513	1.22065	0.86342	1.11687	0.848334	1.08642	0.913994	0.920707	0.724773	0.9123	405.465	18	9.34695	10.272
P24090	Alpha-2-HS-glycoprotein OS=Rattus norvegicus OX=10116 GN=Ahsg PE=1 SV=2 - [FETUA_RAT]	3	11	11	151	2.19992	0.859121	0.851567	1.46283	0.801689	0.557539	1.12853	0.770296	0.589398	0.394135	1.02549	1.5219	0.340631	0.757706	1.77512	0.801712	0.459004	0.980331	1.31679	0.603221	0.449237	0.783644	0.629222	1.3676	1.52499	1.07446	0.664704	1.64417	0.697213	1.47901	1.49744	0.841487	1.04067	0.505506	1.09047	0.992312	689.814	41	37.9582	6.50732
G3V8U8	Branched-chain-amino-acid aminotransferase OS=Rattus norvegicus OX=10116 GN=Bcat2 PE=1 SV=1 - [G3V8U8_RAT]	2	5	12	43	0.830787	0.98138	1.12209	0.683085	0.981329	1.03967	1.06627	1.28969	1.06919	1.46829	1.07803	0.768692	1.28652	1.29809	0.662615	1.02079	1.36678	1.08667	1.05219	0.973826	1.35709	1.04837	1.12962	0.671065	1.01899	0.618398	1.2103	0.862633	1.07132	0.390695	0.994904	1.26435	1.14923	1.303	0.959596	1.06261	241.26	10	44.2009	8.1626
P49242	40S ribosomal protein S3a OS=Rattus norvegicus OX=10116 GN=Rps3a PE=1 SV=2 - [RS3A_RAT]	2	2	8	23	0.966173	0.945355	1	0.959028	0.871127	0.986123	1.11157	0.943472	0.901055	0.902138	0.919048	1.00396	1.1001	1.06279	0.573552	1.2271	1.02828	1.03048	1.08393	1.13145	0.835276	0.835802	0.917127	1.11419	0.974118	0.857982	0.844373	1.07397	0.938827	0.824865	0.685012	0.919279	0.944114	0.947629	1.03936	1.08722	70.97	6	29.9257	9.72998
A0A0G2K7X0	Acidic leucine-rich nuclear phosphoprotein 32 family member A OS=Rattus norvegicus OX=10116 GN=Anp32a PE=1 SV=1 - [A0A0G2K7X0_RAT]	3	3	5	16	2.08467			1.48921	0.931624			0.836015	0.658158			1.013	0.735323			0.621919	0.766793			0.624287	0.790823			0.596344	1.18187			1.15521	0.998191			0.738994	1.1451			1.29293	61.93	5	26.3001	4.00537
Q62658	Peptidyl-prolyl cis-trans isomerase FKBP1A OS=Rattus norvegicus OX=10116 GN=Fkbp1a PE=1 SV=3 - [FKB1A_RAT]	1	2	2	17	1.99922	1.05298	1.08484	1.1925	0.962804	0.619906	1.01655	0.563435	0.615591	0.525577	0.922189	1.29115	0.450744	0.635443	2.05315	0.853669	0.564787	1.04722	1.02766	0.685825	0.513692	0.976188	0.70703	1.20743	0.930224	1.32707	0.810084	1.0964	0.816535	2.26042	2.0882	0.832642	0.732288	0.462708	1.22081	0.956354	131.36	4	11.9151	8.1626
P30904	Macrophage migration inhibitory factor OS=Rattus norvegicus OX=10116 GN=Mif PE=1 SV=4 - [MIF_RAT]	4	3	5	67	1.89596	1.19748	0.947448	1.20067	1.13324	0.7743	1.10251	0.636652	0.830548	0.665067	0.912388	1.25316	0.583709	0.807738	1.86351	0.955071	0.646967	1.11407	1.16252	0.624201	0.60492	1.0066	0.754254	1.23	1.01452	1.3161	0.843163	1.20848	0.895188	2.10871	2.26566	0.935979	0.882047	0.665465	0.895708	1.15654	158.245	18	12.4692	7.34229
P04762	Catalase OS=Rattus norvegicus OX=10116 GN=Cat PE=1 SV=3 - [CATA_RAT]	1	5	11	46	0.769081	1.08514	1.22852		0.663473	1.30178	0.86759		1.21135	0.845083	0.997456		1.01702	1.02353	0.753048		1.03002	0.957037	0.890123		1.18062	1.0877	0.904847		0.740597	0.766961	0.980017		0.837586	0.908432	0.91037		1.15254	0.976677	1.16106		161.009	11	59.7195	7.50342
D4AC73	Coiled-coil-helix-coiled-coil-helix domain-containing 7 OS=Rattus norvegicus OX=10116 GN=Chchd7 PE=1 SV=2 - [D4AC73_RAT]	1	1	2	9	1.53923	1.09747	1.16114	1.12932	1.34595	0.710135	1.09363	0.807201	0.989154	0.976164	1.38764	1.15489	0.753218	1.02995	1.64933	0.99349	0.725441	1.22484	0.964226	0.463172	0.84311	1.09141	0.973263	1.43599	1.30699	1.97958	0.95898	1.30101	0.986606	1.98148	1.8323	0.854763	0.966679	0.700549		0.924917	70.9767	2	10.0947	8.51416
P62634	Cellular nucleic acid-binding protein OS=Rattus norvegicus OX=10116 GN=Cnbp PE=2 SV=1 - [CNBP_RAT]	2	3	5	29			1.10999	1.1644			1.36495	0.58009			1.1299	1.24826			1.76151	0.962463			1.08569	0.616667			0.699506	0.969424			0.766196	1.27278			1.32442	0.871083			1.23712	1.03559	91.6244	6	19.4496	7.7085
Q6NYB7	Ras-related protein Rab-1A OS=Rattus norvegicus OX=10116 GN=Rab1A PE=1 SV=3 - [RAB1A_RAT]	33	1	6	23																																					82.57	4	22.6634	6.21436
Q6IUR5	Neudesin OS=Rattus norvegicus OX=10116 GN=Nenf PE=2 SV=1 - [NENF_RAT]	1	1	3	5			0.83487				0.92281				1.07345				1.82993				1.08848				0.566744				0.791895				1.61846				1.32792		48.53		18.9798	5.43994
P24473	Glutathione S-transferase kappa 1 OS=Rattus norvegicus OX=10116 GN=Gstk1 PE=1 SV=3 - [GSTK1_RAT]	1	3	5	22	0.886538	1.16308	0.920247	0.962486	0.977586	0.956459	0.850593	1.25741	1.11298	1.25279	0.98491	0.799684	1.10212	1.15638	0.876935	1.30564	1.2635	0.970178	0.989089	1.24891	1.18302	1.04835	1.05905	1.25596	1.05832	0.961094	1.10466	0.880499	0.98851	0.593543	0.760488	1.00413	0.99981	1.20036	0.92152	1.08713	123.865	4	25.4763	9.0708
Q6P6G9	Heterogeneous nuclear ribonucleoprotein A1 OS=Rattus norvegicus OX=10116 GN=Hnrnpa1 PE=1 SV=1 - [Q6P6G9_RAT]	4	2	5	21	0.919962	0.976423	1.27249	1.06042	0.599811	0.865217	1.17894	0.645013	0.639609	0.778753	0.849154	1.72336	0.763798	0.906277	1.26378	0.858421	0.675849	0.834428	0.871292	0.77262	0.776073	0.846751	0.60649	0.818896	0.642216	1.00618	0.749469	1.02517	0.764075	1.90996	0.951635	0.86513	0.828083	0.765678	1.32042	0.938457	155.443	5	33.599	9.23193
B2RYS8	NADH dehydrogenase [ubiquinone] 1 beta subcomplex subunit 8, mitochondrial OS=Rattus norvegicus OX=10116 GN=Ndufb8 PE=1 SV=1 - [B2RYS8_RAT]	1	2	4	59	1.16151	1.11772	0.776663	1.05394	0.806907	0.828304	1.07745	0.93528	0.90575	0.811172	0.894685	0.899217	0.79637	0.996082	1.35872	0.652842	0.720978	0.784498	0.502832	0.868975	0.71606	1.13842	0.886547	0.93982	1.00274	1.59395	0.949508	1.02685	0.94539	0.874445	1.25801	0.789672	0.955628	0.788925	1.10949	1.35803	210.075	17	21.9444	6.04932
M0R7S5	Perilipin 4 OS=Rattus norvegicus OX=10116 GN=Plin4 PE=4 SV=2 - [M0R7S5_RAT]	1	2	3	49	0.589308	0.597531	0.952312	0.644355	1.17708	0.899288	1.18224	1.13979	1.13776	1.21004	1.00043	1.02168	1.1682	1.05892	0.648503	0.874684	1.55322	1.20333	1.16787	1.45036	1.25304	0.643992	0.984752	0.788493	0.953285	0.555169	0.762419	0.655017	1.05507	1.39545	0.927713	1.19526	1.15854	1.10481	0.891582	0.944834	245.973	13	141.175	9.0415
Q52KS1	ATP-dependent 6-phosphofructokinase OS=Rattus norvegicus OX=10116 GN=Pfkm PE=1 SV=1 - [Q52KS1_RAT]	4	7	18	71	1.01832	1.00856	0.948984	0.584838	1.15178	1.29035	0.904759	1.27513	1.28277	1.5431	1.0081	0.577148	1.45099	1.15493	0.624493	1.05352	1.32337	1.0385	1.04477	1.23399	1.37727	0.928538	1.1467	0.604814	1.01552	0.642571	1.1769	0.840654	1.1446	0.562603	0.807751	1.1315	1.17459	1.31347	0.951297	0.953564	333.133	12	85.2886	7.88428
Q6AY56	Tubulin alpha-8 chain OS=Rattus norvegicus OX=10116 GN=Tuba8 PE=2 SV=1 - [TBA8_RAT]	1	1	10	103		1.23153	1.01302	0.615697		1.27513	0.824635	1.32647		1.46594	1.06565	0.812293		1.13781	0.931617	1.10225		1.17584	1.12395	1.53198		1.02905	0.958214	0.669553		0.768299	0.862381	0.982014		0.623549	0.914048	1.02246		1.32044	1.3141	0.977323	284.369	22	50.0055	5.09717
Q5M878	Serum amyloid A protein OS=Rattus norvegicus OX=10116 GN=Saa4 PE=1 SV=1 - [Q5M878_RAT]	2	2	4	13		1.23681				0.986324				0.692379				0.949998				1.02988				0.972369				1.91074				1.05205				0.945473			44.72	1	14.9634	9.1001
Q4V8F9	Hydroxysteroid dehydrogenase-like protein 2 OS=Rattus norvegicus OX=10116 GN=Hsdl2 PE=2 SV=1 - [HSDL2_RAT]	1	5	11	82	0.650174	0.980077	1.16663	0.639727	0.98352	1.37149	1.00627	1.13804	1.25984	1.39775	1.28125	0.83865	1.24887	1.20483	0.498878	0.734657	1.14954	1.13145	0.861588	1.25455	1.29975	0.948085	1.3331	0.659037	0.957102	0.73236	1.22589	0.967493	1.01218	0.788224	0.812739	1.25233	1.16828	0.850735	1.013	0.917256	497.688	16	58.3069	6.18896
D3ZDQ9	Sarcoglycan, alpha OS=Rattus norvegicus OX=10116 GN=Sgca PE=1 SV=1 - [D3ZDQ9_RAT]	1	2	8	39	1.30389	1.23961	0.778762	1.05323	1.08618	1.06356	1.11802	1.12182	0.927049	1.07201	0.717096	0.765465	0.97432	0.95881	0.895389	1.13124	1.14468	1.04588	0.682734	0.963434	0.875743	1.20906	0.920785	0.7993	1.22835	1.12662	0.946792	1.06786	1.20567	1.16137	0.884435	0.78577	1.09087	0.899248	0.832918	1.17667	166.363	10	43.1293	6.62451
D3ZYX8	Cytochrome c oxidase subunit 7A2-like OS=Rattus norvegicus OX=10116 GN=Cox7a2l PE=1 SV=1 - [D3ZYX8_RAT]	1	2	3	9		0.881761	0.988099	0.781615		1.22154	0.952475	1.20479		1.21011	1.04972	0.68717		1.344	0.717146	0.839493		1.05251	1.12362	1.12199		1.09257	1.24561	1.29171		0.740259	1.04086	0.92458		0.588149	0.890929	1.06319		1.37848	0.982654	0.955147	142.38	1	13.265	9.74463
O35796	Complement component 1 Q subcomponent-binding protein, mitochondrial OS=Rattus norvegicus OX=10116 GN=C1qbp PE=1 SV=2 - [C1QBP_RAT]	1	2	5	25		1.25749				0.960384				0.848				1.09036				0.935914				1.37519				1.39313				1.51407				0.872912			80.4122	11	30.9775	4.86865
D4A8F2	Ras suppressor protein 1 OS=Rattus norvegicus OX=10116 GN=Rsu1 PE=1 SV=3 - [D4A8F2_RAT]	1	4	5	17	0.998072	0.742106	0.997611	1.26359	1.07626	0.719165	0.876364	1.0412	0.971734	0.979514	0.721648	1.85444	0.997149	0.984555	0.866652	1.16028	1.09565	0.775689	0.962546	1.44849	1.03436	0.969008	0.74133	1.67649	1.07038	1.24438	0.448058	1.06135	1.06422	1.57009	0.806808	1.25268	1.08165	1.06745	0.847836	1.00902	110.89	5	31.3176	7.95752
D4A7F2	Myc-binding protein OS=Rattus norvegicus OX=10116 GN=Mycbp PE=1 SV=1 - [D4A7F2_RAT]	1	1	2	8		0.931088		1.73575		0.410044		0.607092		0.35263		1.30201		0.576836		1.01823		0.725782		0.629771		0.885105		1.90012		2.06214		1.4776		2.04769		0.739833		0.416053		0.948398	49.7033	2	11.9623	5.90967
Q6AXV4	Sorting and assembly machinery component 50 homolog OS=Rattus norvegicus OX=10116 GN=Samm50 PE=1 SV=1 - [SAM50_RAT]	1	7	11	53	0.781066	0.995066	0.91579	0.643052	0.969031	1.3851	1.11635	1.2752	1.171	1.46881	1.06105	0.585424	1.32967	1.30894	0.6136	0.906112	1.31718	1.17179	0.913843	0.815365	1.34627	0.902783	1.36044	0.55732	1.02498	0.593862	1.15605	0.745286	1.18211	0.569303	0.771898	1.03466	1.13886	1.20392	0.763799	0.807699	221.444	11	51.9274	6.80029
G3V9L3	Dual-specificity phosphatase 3 OS=Rattus norvegicus OX=10116 GN=Dusp3 PE=1 SV=2 - [G3V9L3_RAT]	2	3	4	17	1.23976	1.0085	0.906633	1.0452	1.07761	0.953195	0.998034	0.803757	1.10812	1.03772	0.893681	1.05743	0.982758	0.93986	1.36156	0.920007	0.906347	0.965862	0.828955	1.17849	0.92738	1.15574	0.928248	0.996056	0.949708	1.00692	1.06135	0.931671	1.00461	1.21742	1.15679	0.995228	1.02395	0.980635	1.28192	1.06341	98.7367	5	21.0815	6.53662
B0K031	60S ribosomal protein L7 OS=Rattus norvegicus OX=10116 GN=Rpl7 PE=1 SV=1 - [B0K031_RAT]	3	2	5	24	0.570432	1.1255	1.0526	0.733541	1.02637	1.78605	1.15166	1.8854	1.33498	1.51592	1.15826	0.737561	1.40681	1.39343	0.493964	1.37106	1.06692	1.52959	0.643042	0.776882	1.75106	1.06977	1.32852	0.936061	0.882848	0.999109	1.92319	1.08278	1.18041	0.701871	1.10428	1.08106	1.45539	1.85348	0.755001	1.06053	113.855	5	30.294	10.8726
P04905	Glutathione S-transferase Mu 1 OS=Rattus norvegicus OX=10116 GN=Gstm1 PE=1 SV=2 - [GSTM1_RAT]	2	1	5	45	0.903497	1.11311	0.903997	0.786788	0.965275	1.03287	0.838888	1.40196	0.977203	0.86171	0.774969	0.598868	1.2208	1.11498	0.732848	1.3192	1.24278	0.892071	0.867697	1.55016	1.20536	0.83876	0.921568	1.00477	1.11639	0.864693	0.773015	0.803585	1.03352	0.57132	0.613062	0.920941	0.817214	1.18855	1.07374	0.993243	164.23	11	25.8971	8.19189
D3ZA93	Acyl-CoA thioesterase 13 OS=Rattus norvegicus OX=10116 GN=Acot13 PE=1 SV=1 - [D3ZA93_RAT]	1	4	4	55	0.850445	0.927571	1.08824	0.975251	0.927964	1.06182	0.984065	1.12639	1.04927	1.23515	1.01555	1.38287	1.01615	1.07249	0.783583	1.20529	0.965698	0.925213	1.34234	1.02165	1.07668	0.919794	1.09316	1.27911	0.85615	0.885287	1.06955	0.832989	0.922507	1.32268	0.919475	1.22489	0.932658	1.09095	0.840339	0.943663	340.072	14	15.2599	8.83643
A0A0G2K747	Single-stranded DNA binding protein 1, isoform CRA_b OS=Rattus norvegicus OX=10116 GN=Ssbp1 PE=1 SV=1 - [A0A0G2K747_RAT]	3	2	3	13	1.21442	0.863501	1.03123	1.3761	1.06768	0.751286	0.811858	0.851603	0.708082	0.776099	0.989242	1.61287	0.607164	0.878584	1.36018	1.28172	0.660921	0.956829	0.780497	1.02414	0.815876	1.04884	0.735405	1.4228	0.605695	1.06121	0.824884	1.17917	0.661283	1.82437	1.21763	1.26033	0.862234	0.766495	0.987228	1.09659	106.31	4	17.1599	9.83252
A0JPQ4	Tripartite motif-containing protein 72 OS=Rattus norvegicus OX=10116 GN=Trim72 PE=1 SV=1 - [TRI72_RAT]	1	6	11	53	0.986163	1.01313	1.05751	0.671247	1.18381	1.25785	0.95006	1.21738	1.0634	1.38043	0.881568	0.755421	1.22717	0.942328	0.98043	0.794911	1.18019	1.01925	0.921074	1.27537	1.38632	1.01003	1.15706	0.720904	0.928955	0.812451	1.14091	0.681761	1.1795	0.641864	1.10496	1.28828	1.0324	0.983665	1.10412	0.889809	248.609	9	52.7978	6.26514
A0A0G2JVM0	Intermediate filament family orphan 2 OS=Rattus norvegicus OX=10116 GN=Aldh4a1 PE=1 SV=1 - [A0A0G2JVM0_RAT]	5	8	13	57	0.721027	1.17467	1.01192	0.819596	0.967976	0.922254	0.833933	1.40347	1.11406	1.25475	1.16399	0.750564	1.22216	0.952089	0.867675	1.11036	1.60376	0.87143	1.06731	1.46254	1.43521	1.20441	1.22792	0.633034	1.01888	0.640135	0.920394	0.674335	0.890184	0.564744	0.825429	1.38595	0.90845	1.09365	1.1332	1.05407	235.677	13	61.8056	7.91357
P02650	Apolipoprotein E OS=Rattus norvegicus OX=10116 GN=Apoe PE=1 SV=2 - [APOE_RAT]	2	5	8	53	2.22575	1.57504		1.1737	1.19244	0.681979		0.683197	0.788273	0.785856		1.16428	0.508995	1.30028		0.604469	0.648641	0.673868		0.675663	0.742918	0.528962		0.675069	1.9495	2.02236		1.30828	1.03873	0.751615		1.05402	1.66236	0.872845		1.05216	233.568	10	35.7313	5.2749
Q6B345	Protein S100-A11 OS=Rattus norvegicus OX=10116 GN=S100a11 PE=3 SV=1 - [S10AB_RAT]	1	1	2	28	1.77621		1.07591	1.51124	1.06648		0.828962	1.07417	0.789509		0.975119	1.2045	0.75682		1.4558	1.21025	0.812133		1.03534	0.778953	0.673747		0.686716	1.34973	1.21886		0.939064	1.13697	0.891692		1.39454	0.927907	1.03453		0.683314	1.15553	135.321	6	11.0575	5.89697
Q5RKJ9	RAB10, member RAS oncogene family OS=Rattus norvegicus OX=10116 GN=Rab10 PE=1 SV=1 - [Q5RKJ9_RAT]	30	2	5	22	0.730648		1.08448	0.559497	1.07567		1.2049	1.14548	1.04638		1.14374	0.508478	1.18017		0.568028	0.998718	1.22451		1.12887	1.46157	1.19888		1.27638	0.728049	0.903339		1.14565	0.756763	1.0585		0.989374	1.00737	1.03438		1.16001	0.813691	108.19	4	22.5266	8.38232
Q5XIN6	Mitochondrial proton/calcium exchanger protein OS=Rattus norvegicus OX=10116 GN=Letm1 PE=1 SV=1 - [LETM1_RAT]	1	5	14	38	1.28725	0.812363	1.00678	1.47158	1.51244	0.816249	1.13399	0.738278	0.836734	0.764119	1.12611	0.98416	0.736574	0.74105	1.15029	1.22227	0.776793	0.684177	1.11127	1.04561	0.869391	0.938538	1.05303	1.61801	1.05067	1.89334	1.18579	1.28437	0.915293	0.997767	1.05949	0.74215	0.815846	0.684528	1.0279	1.14936	115.09	7	83.0079	6.59521
Q6P0K8	Junction plakoglobin OS=Rattus norvegicus OX=10116 GN=Jup PE=1 SV=1 - [PLAK_RAT]	3	13	16	72	0.749695	1.03646	0.94693	0.548422	1.098	1.24281	1.13303	1.1714	1.25859	1.21834	1.09297	0.568998	1.25438	1.33546	0.606734	0.946848	1.29216	1.2121	1.07918	1.16948	1.30291	0.929197	1.13577	0.674551	1.11152	0.76307	1.21103	0.900451	1.16892	0.646891	0.814376	1.21413	1.216	1.28824	1.02759	0.811197	421.541	16	81.7488	6.13818
Q68FS4	Cytosol aminopeptidase OS=Rattus norvegicus OX=10116 GN=Lap3 PE=1 SV=1 - [AMPL_RAT]	1	7	11	58	0.879172	1.19711	1.46835	0.924564	0.687696	1.11199	0.732972	1.45434	1.12507	0.883843	1.06046	0.562441	1.25939	0.969668	0.854818	1.06463	1.32773	1.12698	0.983706	1.57997	1.23776	1.10376	1.45321	0.786172	0.734859	0.787533	1.35178	0.744429	0.742321	0.715794	0.695857	0.863071	1.02088	1.46611	1.15016	1.10794	283.423	13	56.1147	7.21045
D4A4P3	NADH:ubiquinone oxidoreductase subunit B3 OS=Rattus norvegicus OX=10116 GN=Ndufb3 PE=1 SV=1 - [D4A4P3_RAT]	2	1	4	16			0.787419	0.965929			0.57811	1.09706			0.675309	0.860561			0.881183	2.41315			0.734185	0.42418			0.838572	2.18342			2.13093	1.21354			1.26504	0.527979			0.559366	0.879901	73.19	4	11.2596	9.0415
Q9QX79	Fetuin-B OS=Rattus norvegicus OX=10116 GN=Fetub PE=2 SV=2 - [FETUB_RAT]	2	6	10	64	1.14548	1.1219	0.574399	1.15755	1.2638	0.762729	1.12885	0.464547	0.617166	0.953703	0.655068	1.79188	0.459665	0.803347	1.18041	0.589934	0.597959	0.884743	0.912629	0.50635	0.66802	1.11941	0.528165	0.891649	1.24852	1.23502	0.429363	0.976898	1.20751	2.87524	2.10852	0.698256	0.862631	0.784036	0.621681	0.713091	145.63	13	41.5359	7.09326
P35738	2-oxoisovalerate dehydrogenase subunit beta, mitochondrial OS=Rattus norvegicus OX=10116 GN=Bckdhb PE=1 SV=3 - [ODBB_RAT]	2	2	5	20	0.82216	1.09098	1.23833	0.745753	0.936771	0.965305	1.11499	1.36872	1.09217	1.43709	0.9111	0.893792	1.40507	1.04872	0.743059	1.00613	1.09369	1.03599	1.03323	0.66002	1.21458	0.939716	1.38885	0.817739	1.26147	0.484456	1.33844	0.939367	1.02686	0.489673	0.923376	1.23826	0.982724	1.11617	0.541298	0.956624	86.85	4	42.7958	6.82959
A0A0G2JYK0	Ab1-233 OS=Rattus norvegicus OX=10116 GN=LOC299282 PE=1 SV=1 - [A0A0G2JYK0_RAT]	5	6	12	69	1.41473	1.23399	1.10495	1.17239	1.26491	0.964515	1.4694	0.895524	0.499067	0.852692	1.16615	2.15406	0.520799	0.630697	1.67713	0.690375	0.620139	1.08015	1.19013	0.885415	0.625456	0.649936	0.996838	0.882707	0.629229	0.592482	0.713067	0.971367	1.24339	1.31516	1.76104	0.86093	0.669068	0.518684	1.18492	0.750909	255.669	21	67.9404	5.38916
D3ZYL4	Mitochondrial ribosomal protein L50 OS=Rattus norvegicus OX=10116 GN=Mrpl50 PE=1 SV=1 - [D3ZYL4_RAT]	1	2	3	5				1.16415				0.858134				1.31085				1.02775				0.898416				1.33924				1.2222				0.894124				1.01176	75.7	2	18.3075	8.99756
Q9R1T1	Barrier-to-autointegration factor OS=Rattus norvegicus OX=10116 GN=Banf1 PE=1 SV=1 - [BAF_RAT]	1	2	4	24	1.38908	1.37825	0.991101	1.48859	0.912186	0.79596	0.932392	0.68636	0.818126	0.741259	0.772883	1.27082	0.824621	0.717615	1.68496	1.07512	0.683923	1.14285	0.867798	0.55511	0.791501	1.07933	0.712804	1.36813	1.16603	1.49915	0.983948	1.54522	1.01918	1.67523	2.144	0.996016	0.983847	0.85479	1.18623	1.03862	132.83	6	10.038	6.0874
B4F7A1	Complex III assembly factor LYRM7 OS=Rattus norvegicus OX=10116 GN=Lyrm7 PE=3 SV=1 - [LYRM7_RAT]	1	2	2	11	1.41844	0.865799		1.37574	1.04694	0.610312		0.55404	0.690724	0.520634		1.29032	0.653294	0.821504		0.988333	0.713901	1.09383		0.774388	0.541638	0.731333		1.90359	0.926421	1.78247		1.38731	0.662032	2.13707		0.901024	0.814042	0.626323		1.01468	90.72	3	12.0225	9.45166
A0JN30	Canopy 2 homolog (Zebrafish) OS=Rattus norvegicus OX=10116 GN=Cnpy2 PE=1 SV=1 - [A0JN30_RAT]	1	3	5	17	2.27049	1.04268	0.888173	1.41374	1.06792	0.619187	0.865781	0.633357	0.44788	0.446879	0.702891	1.01865	0.349673	0.731312	1.81597	0.945874	0.566033	0.990442	0.592825	0.867236	0.650681	0.929776	0.668868	1.44815	1.22462	1.57525	0.686157	1.30756	0.880366	2.14807	1.70618	0.796751	0.727118	0.606276	1.12727	1.27478	102.75	3	20.6963	5.13525
B2RYW9	Fumarylacetoacetate hydrolase domain-containing protein 2 OS=Rattus norvegicus OX=10116 GN=Fahd2 PE=1 SV=1 - [FAHD2_RAT]	1	3	6	16	1.44493	1.27761			1.26022	2.32094			0.879314	1.25844			0.887725	1.59012			0.972795	1.02025			0.923397	2.1904			0.823301	1.24224			0.962771	1.509			0.993951	1.40295			69.13		34.5591	8.35303
A0A0G2K401	Propionyl-CoA carboxylase alpha chain, mitochondrial OS=Rattus norvegicus OX=10116 GN=Pcca PE=1 SV=1 - [A0A0G2K401_RAT]	3	6	16	52	0.704122	1.00026		0.798608	1.03362	1.23395		1.18002	1.19151	1.17699		0.945646	1.23137	1.18725		1.14039	1.17595	1.07228		1.16361	1.27301	1.41811		0.800208	0.96297	1.00501		0.846078	1.11951	0.640753		1.11444	1.12487	1.08219		0.936525	159.05	10	79.761	7.21045
Q5U1Z9	Metaxin 2 OS=Rattus norvegicus OX=10116 GN=Mtx2 PE=1 SV=1 - [Q5U1Z9_RAT]	1	5	7	36	0.698054	1.20549	1.09095	1.08782	1.041	1.10762	1.02517	1.15967	1.26798	1.36992	1.06655	0.944728	1.2178	1.24751	0.945091	0.965691	1.06534	1.05333	0.964414	0.457153	1.00123	1.01536	1.15186	1.22243	0.998956	1.15709	1.10699	0.973818	0.986314	0.736832	1.0128	0.96589	0.961807	1.03668	0.547759	1.11207	138.57	9	29.699	5.33838
P97615	Thioredoxin, mitochondrial OS=Rattus norvegicus OX=10116 GN=Txn2 PE=2 SV=1 - [THIOM_RAT]	1	1	2	8				1.04982				0.769899				1.19291				0.989375				0.957427				1.13224				1.40041				0.74629				0.995823	73.3267	3	18.2205	7.89893
P17220	Proteasome subunit alpha type-2 OS=Rattus norvegicus OX=10116 GN=Psma2 PE=1 SV=3 - [PSA2_RAT]	1	3	4	14	0.702594	1.51988	1.02673		0.627262	1.51706	0.843784		1.09729	1.56679	0.907592	1.2279	1.3899	1.38853	0.717443		1.1874	0.772896	0.55147	1.60337	1.20013	1.41771	1.0059		1.04964	0.897983	0.832481		1.0509	0.752525	0.903108	0.724766	1.01896	1.33413	0.494936	0.848263	131.58	2	25.9103	7.43018
P04638	Apolipoprotein A-II OS=Rattus norvegicus OX=10116 GN=Apoa2 PE=2 SV=1 - [APOA2_RAT]	1	2	3	25	2.50048	1.57456	0.710998		1.36319	1.3115	0.616325		0.379994	0.529555	0.714736		0.405218	0.92957	0.829804		0.736897	1.36899	1.29299		0.836544	0.517354	0.353953		1.79463	3.60489	0.256636		1.19607	1.0536	1.30486		1.06828	0.553319	1.00559		125.62	3	11.4319	6.65381
D3ZTN2	COX assembly mitochondrial protein OS=Rattus norvegicus OX=10116 GN=Cmc1 PE=1 SV=2 - [D3ZTN2_RAT]	1	2	3	6		0.773438				0.665224				0.573248				0.701998				1.04458				0.637467				1.4672				1.75014				0.561083			48.39	2	12.5633	8.23584
Q4QQV0	Tubulin beta chain OS=Rattus norvegicus OX=10116 GN=Tubb6 PE=1 SV=1 - [Q4QQV0_RAT]	2	1	11	74																																					243.314	13	50.0271	4.89404
P27274	CD59 glycoprotein OS=Rattus norvegicus OX=10116 GN=Cd59 PE=1 SV=2 - [CD59_RAT]	1	2	4	18	1.60768	1.40658	0.922059	1.27731	1.20216	1.31235	1.4641	1.0289	0.826979	0.926713	0.789794	0.739073	0.818402	0.96263	1.45149	0.827343	0.918419	1.07031	0.688942	0.425015	0.930379	1.05122	0.933519	0.742006	1.0628	1.11379	0.982532	1.13964	1.02104	1.04449	1.19616	1.03027	1.03096	1.00333	0.257541	1.2912	97.9271	4	13.781	8.48486
B0BN94	Protein FAM136A OS=Rattus norvegicus OX=10116 GN=Fam136a PE=1 SV=1 - [F136A_RAT]	1	2	3	8		1.1589	1.10823			0.615575	1.05589			0.545786	1.05139			0.661898	1.10074			0.915023	1.38455			0.792316	0.997934			1.48018	0.821909			1.74489	1.13563			0.606669	1.2493		70.5	1	15.6146	7.60596
B0K010	Thioredoxin domain-containing 17 OS=Rattus norvegicus OX=10116 GN=Txndc17 PE=1 SV=1 - [B0K010_RAT]	1	2	4	19	1.4567		0.874979	1.20728	1.0987		1.00153	0.804156	0.712438		0.834548	1.1893	0.621713		1.3784	1.04243	0.721781		1.04036	0.901148	0.660562		0.703764	1.16098	1.03841		0.971126	1.13471	0.821652		1.28846	0.827599	0.771513		1.04793	1.07086	58.9902	5	14.0829	4.93213
Q6MGC4	H2-K region expressed gene 2, rat orthologue OS=Rattus norvegicus OX=10116 GN=Pfdn6 PE=1 SV=1 - [Q6MGC4_RAT]	1	3	3	18	1.51921			1.3055	1.15211			0.700023	0.606928			1.24568	0.576042			1.25213	0.513219			0.900946	0.821605			1.55719	0.934142			1.15952	0.67417			0.980461	0.749756			0.94847	90.69	5	14.4888	8.88037
D3Z9I1	Cytochrome C oxidase assembly factor 3 OS=Rattus norvegicus OX=10116 GN=Coa3 PE=1 SV=1 - [D3Z9I1_RAT]	1	2	3	11	1.13063	0.93748	0.973246	0.989118	1.39434	1.00339	0.908411	0.974541	1.05065	1.13017	0.985228	0.888279	0.897868	0.937618	0.795043	1.18121	0.839448	0.874576	1.09841	1.09881	0.876819	0.945947	0.833355	1.42027	1.0285	1.18872	0.948824	1.00595	1.05852	0.818188	0.816524	0.873908	0.842591	0.953851	1.15112	0.929404	83.98	2	11.9212	9.59814
Q8VID1	Dehydrogenase/reductase SDR family member 4 OS=Rattus norvegicus OX=10116 GN=Dhrs4 PE=2 SV=2 - [DHRS4_RAT]	2	5	6	24	0.768076	0.945201	1.16723	0.590227	0.878385	1.28264	0.913157	1.28386	1.09207	1.23044	1.15106	0.708991	1.09334	1.17115	0.482219	0.887959	1.11971	1.14479	1.0661	1.12333	1.02821	0.905764	1.27199	0.580472	0.926285	0.555106	1.14215	0.775584	0.879611	0.591685	0.671256	1.12319	0.90714	1.054	0.950137	0.892173	145.197	5	29.8028	9.5542
Q5XI34	Protein phosphatase 2 (Formerly 2A), regulatory subunit A (PR 65), alpha isoform, isoform CRA_a OS=Rattus norvegicus OX=10116 GN=Ppp2r1a PE=1 SV=1 - [Q5XI34_RAT]	2	9	11	49	0.932804	0.940468	1.01262	1.14148	1.19774	1.04891	0.91356	1.01229	1.08425	1.01041	0.996229	0.825798	1.10821	0.879793	0.874286	1.28796	0.976138	0.913647	1.01774	1.05842	1.06517	1.01544	1.05496	1.28561	1.1465	1.14973	0.991909	1.1417	1.09317	0.670242	0.929549	0.83093	0.981396	1.03607	0.891067	0.941581	239.065	10	65.2809	5.10986
G3V7Z3	Nucleolar protein 3 OS=Rattus norvegicus OX=10116 GN=Nol3 PE=1 SV=1 - [G3V7Z3_RAT]	2	4	4	23	2.23999	1.41086	0.979913	1.05108	0.960261	0.699654	1.11332	0.819518	0.765802	0.553797	0.860923	0.902694	0.660166	0.84773	1.31777	0.872996	0.633584	0.975871	0.739872	0.843532	0.773962	1.19454	0.897207	1.09754	1.01836	1.313	1.08186	1.21357	0.832576	1.92559	1.51908	0.782806	0.818063	0.656079	0.995851	1.07012	206.154	6	24.4763	4.06885
P62083	40S ribosomal protein S7 OS=Rattus norvegicus OX=10116 GN=Rps7 PE=1 SV=1 - [RS7_RAT]	1	1	3	16	0.614105	0.937668	1.30105		0.851613	1.10938	0.994609		1.02515	1.29752	1.12003		1.29047	1.00075	0.903712		1.07907	1.19461	1.25855		1.22627	0.953101	1.21679		0.810847	0.869653	1.03808		0.959958	1.24659	0.971791		0.885419	1.4329	1.15272		80.17	5	22.1133	10.0962
P07150	Annexin A1 OS=Rattus norvegicus OX=10116 GN=Anxa1 PE=1 SV=2 - [ANXA1_RAT]	1	5	7	29	1.27111	1.32356		0.98316	1.02132	1.17324		1.06783	0.951983	1.09658		1.01948	0.960309	1.02318		1.17198	1.08066	0.784953		1.24909	0.946787	1.49448		1.14303	1.09391	1.8397		0.887161	0.888969	0.88092		0.993362	1.08958	1.45134		0.97982	120.175	11	38.8049	7.34229
F1M983	Complement factor H OS=Rattus norvegicus OX=10116 GN=Cfh PE=1 SV=1 - [F1M983_RAT]	3	11	23	78	2.19964	0.899214	1.23636	1.32831	0.715239	0.841569	0.758001	0.813598	0.737469	0.503967	0.94841	0.97978	0.625051	1.02842	0.979915	0.980161	0.814826	1.03289	1.11156	0.807796	0.68577	0.948641	0.773184	1.0958	1.48425	1.66608	0.737751	1.19924	0.713476	2.10884	1.40787	0.919362	1.01357	0.761499	1.02363	0.96578	173.63	21	139.916	6.87354
A0JPM9	Eukaryotic translation initiation factor 3 subunit J OS=Rattus norvegicus OX=10116 GN=Eif3j PE=1 SV=1 - [EIF3J_RAT]	1	4	6	38	1.60771	1.09151		1.30353	1.03537	0.655257		0.730849	0.902474	0.843766		1.04706	0.663764	0.764735		0.923462	0.71908	1.0034		0.701161	0.661926	1.07734		1.01693	1.07871	1.51724		1.26945	0.827773	1.66001		0.916053	0.898096	0.615965		1.20117	91.08	10	29.1695	4.80518
P20760	Ig gamma-2A chain C region OS=Rattus norvegicus OX=10116 GN=Igg-2a PE=1 SV=1 - [IGG2A_RAT]	1	6	9	61	0.882287	0.822548	0.685649	1.19723	1.73546	1.21809	0.414897	0.720783	1.37868	0.954018	0.653163	0.999789	1.38916	0.840732	0.696322	0.353216	2.63078	1.2111	1.02874	0.361137	1.43654	1.38499	0.434057	0.543173	1.01575	0.944154	0.511214	0.509671	2.03898	1.41306	0.675423	0.578599	1.54209	1.02377	0.515622	0.707037	431.03	12	35.1634	7.6792
A0A0H2UHG7	40S ribosomal protein S20 OS=Rattus norvegicus OX=10116 GN=Rps20 PE=3 SV=1 - [A0A0H2UHG7_RAT]	4	1	2	2	1.30673				1.24534				0.764556				1.25438				1.05984				1.10513				1.34052				0.993251				1.06205				35.95		13.2333	9.93506
Q63ZY8	Coiled-coil-helix-coiled-coil-helix domain containing 10 OS=Rattus norvegicus OX=10116 GN=Chchd10 PE=1 SV=1 - [Q63ZY8_RAT]	1	2	2	23		1.12013	1.01697	1.09993		0.750502	0.981466	0.8523		0.764325	0.906587	1.19835		0.923423	2.22268	1.21509		1.00062	1.10375	0.735966		0.917304	0.809999	1.28966		1.42891	0.814392	1.12221		1.63365	1.59353	1.03118		0.767158	0.494317	1.03023	111.93	5	13.8187	8.22119
P07340	Sodium/potassium-transporting ATPase subunit beta-1 OS=Rattus norvegicus OX=10116 GN=Atp1b1 PE=1 SV=1 - [AT1B1_RAT]	2	3	10	87	1.206	1.21973	0.900214	0.891361	0.987571	1.09051	1.03365	1.15152	0.943817	1.29316	0.765629	0.767769	1.08314	0.980935	1.07363	0.807329	1.01169	1.10901	0.809123	1.08784	0.958792	1.2333	0.824048	0.698965	1.17627	1.09961	0.951129	0.869603	1.23922	1.00566	0.869797	0.945196	0.924523	0.954711	1.01154	1.11811	356.146	23	35.179	8.646
M0R785	Coiled-coil-helix-coiled-coil-helix domain-containing protein 2, mitochondrial-like OS=Rattus norvegicus OX=10116 GN=LOC100911516 PE=4 SV=1 - [M0R785_RAT]	3	2	5	16	1.55663	0.852459	0.887704	1.17389	1.33949	0.912605	0.937117	0.739375	0.783069	0.775146	1.32992	1.3362	0.610791	0.975742	1.44064	1.1096	0.655675	1.00047	1.20483	0.46912	0.701653	0.853694	0.751499	1.50358	0.983352	1.29001	0.858795	1.12634	0.84231	1.79073	1.51708	0.980962	0.82767	0.738811	0.379997	1.09876	88.89	5	15.8389	9.33447
O88794	Pyridoxine-5'-phosphate oxidase OS=Rattus norvegicus OX=10116 GN=Pnpo PE=1 SV=1 - [PNPO_RAT]	1	3	7	23	1.92817	1.00541	1.15696		1.16719	0.784125	0.842904		0.552257	0.83728	0.525081		0.45018	0.608764	1.87053		0.748787	1.41702	1.14518		0.545545	1.00015	0.955742		0.927297	1.95148	0.791724		1.01337	1.9851	2.26253		0.764051	0.710398	1.78524		63.62	8	30.165	8.41162
Q03344	ATPase inhibitor, mitochondrial OS=Rattus norvegicus OX=10116 GN=Atp5if1 PE=3 SV=2 - [ATIF1_RAT]	1	2	6	34		0.898161	0.853002	1.18873		0.523114	0.823938	0.596287		0.534311	0.898575	1.32372		0.772931	1.81106	1.08999		1.08955	1.26419	0.673541		1.02183	0.581599	1.36836		1.53927	0.667809	1.27577		2.07465	1.75061	0.809524		0.560378	0.931806	1.10721	48.0944	8	12.2403	9.59814
P70470	Acyl-protein thioesterase 1 OS=Rattus norvegicus OX=10116 GN=Lypla1 PE=1 SV=1 - [LYPA1_RAT]	1	3	5	13	0.99188		1.06628	0.952659	1.11288		0.943276	0.93906	1.05369		0.942561	1.14118	1.00793		0.96053	1.02556	1.04573		1.16154	0.941202	1.13097		1.0201	1.02005	0.917284		0.892965	0.967908	1.14339		0.970849	0.934747	0.974034		1.13065	0.911068	108.47	3	24.6923	6.50732
G3V7K3	Ceruloplasmin OS=Rattus norvegicus OX=10116 GN=Cp PE=1 SV=1 - [G3V7K3_RAT]	3	14	22	123	1.13446	0.957011	0.663835	0.709576	0.539341	1.24694	0.425136	0.990261	1.44947	0.655349	1.17015	0.425886	1.45976	1.44107	0.791071	0.68942	1.58971	1.29659	0.890041	1.00958	1.51007	1.21843	1.05277	0.481199	2.03853	0.962207	0.806607	0.760994	0.610375	0.698717	0.284492	1.50222	1.94927	1.5961	0.883333	0.582231	565.835	20	120.589	5.64307
P09456	cAMP-dependent protein kinase type I-alpha regulatory subunit OS=Rattus norvegicus OX=10116 GN=Prkar1a PE=1 SV=2 - [KAP0_RAT]	3	5	9	58	1.34354	1.08457	1.13191	1.22016	1.01798	0.966872	1.00265	1.04855	0.824148	0.719352	1.17613	1.20503	0.88145	0.930559	1.27359	1.16509	0.816732	0.806391	1.12183	1.14236	0.908507	1.34524	0.988552	0.965478	1.09719	1.03909	1.01645	1.15817	1.03884	1.06333	1.02621	0.921561	0.906682	0.90052	1.0442	1.22331	203.712	16	43.068	5.35107
P02767	Transthyretin OS=Rattus norvegicus OX=10116 GN=Ttr PE=1 SV=1 - [TTHY_RAT]	1	2	4	61	1.73232	0.730724	1.02446	0.95689	0.935164	0.625961	1.59555	0.626502	0.438116	0.455335	0.896254	2.21108	0.341835	0.61455	1.63055	0.694596	0.457975	0.880877	1.6951	0.795222	0.421204	0.557679	0.671283	1.3311	0.938987	0.774648	0.595359	1.27628	0.734436	1.49832	2.68164	0.802896	0.77252	0.377099	1.43055	0.829432	404.868	16	15.7099	6.16357
P29147	D-beta-hydroxybutyrate dehydrogenase, mitochondrial OS=Rattus norvegicus OX=10116 GN=Bdh1 PE=1 SV=2 - [BDH_RAT]	2	6	7	40	0.623096	1.00128	0.805172	0.628352	0.934098	1.12447	1.01751	1.844	1.61108	1.49108	1.32731	0.653465	1.18751	1.37059	0.720764	1.21962	1.22908	0.928407	1.1541	0.75257	1.15267	1.05623	1.60998	0.886028	0.905172	0.512582	1.19099	0.753521	1.03134	0.498631	0.684254	1.10489	0.904187	1.24253	0.600352	1.0575	164.032	10	38.1773	8.83643
A0A0G2JW01	Uncharacterized protein OS=Rattus norvegicus OX=10116 PE=1 SV=1 - [A0A0G2JW01_RAT]	5	2	7	34	1.01922	1.02744	1.31817		0.856306	1.0119	0.693476		0.846707	0.953306	0.650742		0.915796	1.08688	1.08389		1.08757	1.12437	0.748017		1.10517	0.868996	0.854494		0.907797	0.665328	0.859356		1.04673	1.12615	1.21127		1.04254	0.899536	0.915744		151.052	7	48.6093	8.07471
A0A0G2K4C6	Malic enzyme OS=Rattus norvegicus OX=10116 GN=Me3 PE=3 SV=1 - [A0A0G2K4C6_RAT]	4	8	10	82	0.725059	0.833274	0.999767	0.903067	1.05562	1.01761	1.04398	1.2603	1.32653	1.25478	1.11014	0.873761	1.08967	1.05539	0.857374	1.06745	1.17437	1.07142	1.01711	1.48051	1.18365	1.00152	1.20697	0.951666	0.896738	0.785954	1.23439	1.00278	1.1402	0.576655	0.951175	1.37565	1.06789	1.1205	1.13433	1.03432	431.273	18	63.3957	7.82568
D4A305	Coiled-coil domain containing 58 (Predicted), isoform CRA_c OS=Rattus norvegicus OX=10116 GN=Ccdc58 PE=1 SV=1 - [D4A305_RAT]	1	2	4	16	2.00586	1.05263	0.97003	1.4584	1.37467	0.631418	0.904334	0.597677	0.552992	0.59909	1.18188	1.54384	0.362779	0.770583	1.58012	0.963497	0.513619	0.949512	1.19146	0.556359	0.480967	0.789835	0.853454	1.7538	0.971773	1.93996	0.918367	1.35723	0.780817	1.79786	1.61516	0.841224	0.685989	0.623624	0.914384	0.950762	97.8032	4	16.6796	8.1626
Q9JKB7	Guanine deaminase OS=Rattus norvegicus OX=10116 GN=Gda PE=1 SV=1 - [Q9JKB7_RAT]	2	2	7	17	0.584634	0.892553	1.02297		0.544507	1.16035	0.862721		1.12367	0.823017	0.797557		1.34103	1.19452	0.724954		1.57325	1.13146	0.612614		1.25785	1.15351	1.2272		1.10184	0.719071	0.82934		0.816264	0.773504	0.589456		1.06111	1.60156	0.795974		88.1133		50.8687	5.71924
P05942	Protein S100-A4 OS=Rattus norvegicus OX=10116 GN=S100a4 PE=2 SV=1 - [S10A4_RAT]	1	1	2	5			1.02974				1.19713				0.854447				1.34505				1.10598				0.94265				0.850696				3.25728				1.24505		51.65		11.7687	5.12256
Q9Z1H9	Caveolae-associated protein 3 OS=Rattus norvegicus OX=10116 GN=Cavin3 PE=1 SV=1 - [CAVN3_RAT]	1	2	6	23	1.70954	1.20313	0.997909	1.07523	1.1688	0.68144	0.875665	1.04576	0.934093	0.724259	0.959955	1.13147	0.847399	0.779876	1.51049	1.12874	0.863741	0.860632	1.52765	1.00811	0.890218	0.998596	0.885601	1.16475	1.08885	1.4216	0.860881	1.18151	0.964098	1.62979	1.21927	1.11618	0.903163	0.783206	0.972499	1.30583	84.1	3	27.8937	6.1001
P24329	Thiosulfate sulfurtransferase OS=Rattus norvegicus OX=10116 GN=Tst PE=1 SV=3 - [THTR_RAT]	1	3	6	16		0.83609	0.937289	0.752694		0.824503	1.22839	1.2455		0.952298	1.04487	0.585655		0.809069	0.925151	0.81574		0.940247	0.945709	1.45194		0.90517	1.23458	0.560699		0.96569	1.03532	0.896463		1.11319	1.00428	1.08158		0.922958	1.23065	0.93395	56.81	1	33.3858	7.85498
G3V8C4	Chloride intracellular channel protein OS=Rattus norvegicus OX=10116 GN=Clic4 PE=1 SV=1 - [G3V8C4_RAT]	2	2	4	27	1.13181	1.1664	1.17676		1.08591	0.979816	1.25288		0.882632	0.838831	1.33115		1.05298	1.13358	1.10459		1.08546	0.854032	1.33164		0.833258	0.856494	1.32096		0.961855	0.997099	1.5132		1.02334	0.89205	1.06436		0.965168	0.94128	1.06509		98.44	9	28.6507	5.59229
Q5XI77	Annexin OS=Rattus norvegicus OX=10116 GN=Anxa11 PE=1 SV=1 - [Q5XI77_RAT]	1	5	10	43	0.826233	1.0018	0.865892	0.806294	0.995122	1.01644	0.96727	1.1365	1.00576	1.0664	0.885586	1.02642	1.03482	0.926041	0.930472	0.917175	1.06499	0.87728	0.979108	1.08804	1.02716	1.26891	1.10916	0.846232	1.08175	0.977419	1.41319	0.871145	1.146	0.829998	1.14634	1.06379	1.109	0.988233	0.848976	0.997877	206.759	8	54.1258	7.6499
P63029	Translationally-controlled tumor protein OS=Rattus norvegicus OX=10116 GN=Tpt1 PE=1 SV=1 - [TCTP_RAT]	1	4	4	26	1.65009	1.27871	0.954428	1.19036	0.939591	1.03482	1.04603	0.780013	0.682762	0.812393	0.77636	1.0528	0.647477	1.02839	1.48692	1.37156	0.64609	0.946599	0.924391	0.699482	0.797604	1.2019	0.85435	1.07771	1.05083	1.39269	0.87163	1.16832	0.916769	1.55571	1.26375	0.776098	0.864692	0.759105	0.994699	1.28985	142.691	8	19.4496	4.85596
D3ZBN0	Histone H1.5 OS=Rattus norvegicus OX=10116 GN=Hist1h1b PE=1 SV=1 - [H15_RAT]	1	2	5	19	0.531588	0.638667	1.11844	0.646195	0.921957	0.98075	1.1733	1.0439	0.975024	1.14698	1.06948	0.803006	1.17269	1.10851	0.492922	0.987274	1.23496	1.22135	1.17515	1.22135	1.0888	0.512224	1.05056	0.807972	0.810937	0.520413	0.801774	0.843245	0.858685	0.818001	0.944849	1.29935	1.06263	1.11655	1.11054	0.778498	87.7397	4	22.6355	10.9604
Q9JLJ3	4-trimethylaminobutyraldehyde dehydrogenase OS=Rattus norvegicus OX=10116 GN=Aldh9a1 PE=1 SV=1 - [AL9A1_RAT]	2	7	9	30	0.653268	0.839565	0.971701		0.999316	1.21709	0.975253		1.27845	1.19753	1.07153		1.24803	1.0062	0.761587		1.2691	0.968871	0.90756		1.23185	1.06812	1.3339		1.0281	0.802854	1.14172		1.10914	0.694078	0.800517		1.05654	1.19217	0.813297		188.56	5	53.618	6.91748
D4A3D2	RCG56113, isoform CRA_a OS=Rattus norvegicus OX=10116 GN=Smyd1 PE=4 SV=1 - [D4A3D2_RAT]	1	3	8	38	0.39827	1.63414	1.39482	0.79549	0.719032	1.87309	1.48043	1.61205	1.5544	2.29641	1.28545	0.814762	1.86789	1.45486	0.639355	0.997138	1.8232	1.53271	0.824221	0.681963	1.49931	1.2173	1.94184	0.883232	1.09534	0.662691	1.94874	1.18262	1.55416	0.481922	1.52988	1.89369	1.44894	1.8756	0.884025	1.36534	110.295	8	56.5168	6.84424
Q5BK81	Prostaglandin reductase 2 OS=Rattus norvegicus OX=10116 GN=Ptgr2 PE=2 SV=2 - [PTGR2_RAT]	1	4	7	48	1.38638	1.17666	1.04427	1.13974	0.887886	0.880443	0.99542	1.06467	0.887582	0.775562	1.08525	1.34799	0.739422	0.902288	1.5896	0.943306	0.794609	1.0082	0.909331	0.559299	0.758663	1.45691	0.884221	0.772765	0.781791	0.945616	0.85699	1.00212	1.02154	1.47597	1.08098	1.07899	0.957092	0.801386	0.758378	1.1607	167.967	18	38.1121	5.5415
P10860	Glutamate dehydrogenase 1, mitochondrial OS=Rattus norvegicus OX=10116 GN=Glud1 PE=1 SV=2 - [DHE3_RAT]	1	9	13	60	0.52174	0.740773	1.04807	0.528081	0.796085	0.852721	1.10788	1.32335	1.28416	1.29282	1.10623	1.04166	1.34619	1.04284	0.593316	0.856811	1.30938	1.09675	0.693888	1.14087	1.30178	0.856908	1.24306	0.58804	0.915259	0.546007	1.09249	0.735695	1.06502	0.510916	0.816098	1.11991	1.00676	1.07108	1.01996	0.91308	286.99	15	61.3773	8.00146
Q9EQP5	Prolargin OS=Rattus norvegicus OX=10116 GN=Prelp PE=2 SV=1 - [PRELP_RAT]	1	3	7	31	1.79603	1.14751	1.24443	1.17502	1.27985	0.787309	1.24788	0.851963	0.762649	0.801216	0.702456	1.30392	0.812157	0.934409	1.10513	0.920621	0.929713	1.03867	0.938114	1.18583	0.771222	1.0544	0.950135	1.12011	1.03103	1.1741	0.923722	1.12342	1.04964	1.35193	1.11361	0.959882	1.02265	1.10979	2.26014	1.06041	146.269	8	43.1519	9.45166
P62282	40S ribosomal protein S11 OS=Rattus norvegicus OX=10116 GN=Rps11 PE=1 SV=3 - [RS11_RAT]	1	1	4	4		0.914083				1.38564				1.40902				1.38277				1.12734				0.889721				0.695408				0.75884				1.38419			52.99		18.419	10.3013
Q63704	Carnitine O-palmitoyltransferase 1, muscle isoform OS=Rattus norvegicus OX=10116 GN=Cpt1b PE=1 SV=1 - [CPT1B_RAT]	1	10	18	109	0.494161	0.932105	1.01288	0.530357	1.11868	1.30988	1.35061	1.31557	1.39081	1.62943	1.16213	0.54392	1.38652	1.19504	0.405985	0.856733	1.36203	1.17992	0.980516	1.15619	1.26455	0.76781	1.17711	0.56389	0.887146	0.545359	1.18369	0.839145	1.18289	0.401703	0.89526	1.39037	1.13523	1.27857	0.996387	0.831765	601.051	19	88.1592	8.60205
Q5U302	Catenin (Cadherin associated protein), alpha 1 OS=Rattus norvegicus OX=10116 GN=Ctnna1 PE=1 SV=1 - [Q5U302_RAT]	4	7	16	46	0.819311	1.35551	0.850015	1.24049	0.97761	1.13526	0.893909	1.02926	1.24394	1.14597	0.814833	0.795716	1.25846	1.2335	1.01119	1.4615	1.15377	1.11811	0.72583	0.898713	1.11082	1.08993	1.03187	1.25087	1.13004	1.03761	1.26611	1.00103	1.12927	0.784537	1.00847	0.933737	1.14693	1.09881	0.858124	0.889494	142.07	15	100.174	6.22705
A0A0G2K542	UTP--glucose-1-phosphate uridylyltransferase OS=Rattus norvegicus OX=10116 GN=Ugp2 PE=1 SV=1 - [A0A0G2K542_RAT]	2	7	10	37	0.660047	0.865396	1.03742	0.78275	0.919757	0.892007	0.877111	1.25416	1.1826	1.16618	1.07254	0.856063	1.02238	0.952905	0.803742	0.977844	1.18442	0.824749	0.975831	1.53487	1.00337	0.772497	1.2601	0.96152	0.958604	0.726594	1.05441	0.95336	0.957358	0.710374	0.895343	1.05982	0.881427	1.21644	0.991982	1.00114	144.209	9	56.8507	7.32764
P00406	Cytochrome c oxidase subunit 2 OS=Rattus norvegicus OX=10116 GN=Mtco2 PE=1 SV=3 - [COX2_RAT]	1	6	6	164	0.720633	0.875657	1.0583	0.785087	1.18972	1.25347	0.934107	1.31859	1.42274	0.899877	0.971002	0.482044	1.26136	1.08199	0.790617	1.18156	0.648557	0.945899	0.826914	1.02471	1.12991	1.39257	1.28576	0.816472	0.967956	0.660417	1.96118	0.917476	1.27786	0.502705	1.2502	0.960994	1.14367	1.05242	1.10559	0.932761	420.374	38	25.9111	4.729
B5DF65	Biliverdin reductase B OS=Rattus norvegicus OX=10116 GN=Blvrb PE=1 SV=1 - [B5DF65_RAT]	1	4	5	27	1.38113	1.01546	1.03942	0.988421	1.08541	0.786643	0.939645	0.781813	0.760606	0.710978	0.9739	1.26	0.758413	0.854331	1.20022	1.06553	0.773204	0.827268	1.07847	1.0371	0.831562	0.968224	0.776515	1.0253	0.999683	1.05839	1.03828	1.02356	0.940542	1.88854	1.589	1.06716	0.845423	0.729372	1.26849	1.0683	115.55	6	22.0803	6.80029
P13645	SWISS-PROT:P13645 Tax_Id=9606 Gene_Symbol=KRT10 Keratin, type I cytoskeletal 10	33	8	9	37	0.232595	0.91847	0.545097	1.00978	1.13745	0.580891	0.657617	0.231231	3.27613	0.764146	0.946775	1.2694	0.561214	0.331502	1.66203	1.42774	0.406336	0.24325	3.20269	0.417717	0.118444	1.79016	1.46028	1.02968	5.81073	0.422887	0.780639	1.99974	0.197316	1.56086	0.379717	0.741138	0.405584	0.921034	1.24072	0.400666	191.18	10	59.4749	5.21143
Q5BJQ0	Atypical kinase COQ8A, mitochondrial OS=Rattus norvegicus OX=10116 GN=Coq8a PE=2 SV=1 - [COQ8A_RAT]	1	10	11	142	1.4495	1.07571	1.02041	1.12391	1.03219	0.953122	1.17362	0.89813	0.788356	0.918377	0.953842	1.50812	0.623481	0.924228	1.32733	1.04549	0.715861	1.00695	1.17087	1.07255	0.716319	0.994912	0.765722	1.02478	1.06167	1.14485	1.06938	1.21855	0.940361	1.32662	1.58411	1.02731	0.898778	0.792686	1.12264	1.16432	936.11	40	72.1797	6.45557
P63025	Vesicle-associated membrane protein 3 OS=Rattus norvegicus OX=10116 GN=Vamp3 PE=1 SV=1 - [VAMP3_RAT]	2	1	1	3			0.84207	1.41947			0.947046	1.1358			0.972484	0.78186			1.36076	1.051			0.870842	1.28009			0.946085	1.22186			0.881115	1.34095			0.99358	0.810492			0.895374	1.28161	34.29	1	11.473	8.49951
P43278	Histone H1.0 OS=Rattus norvegicus OX=10116 GN=H1f0 PE=2 SV=2 - [H10_RAT]	1	3	5	17	0.665139	0.606364	1.10867	0.704784	0.849972	1.02576	1.00433	0.908877	1.06242	1.48995	1.05829	1.41459	1.40699	1.25383	0.708141	0.925542	1.39249	1.14603	1.06462	0.96246	1.16425	0.517261	0.922958	0.851647	0.861226	0.368602	0.858101	0.644444	1.03524	0.883356	0.759067	1.25189	1.18616	1.28197	0.757264	0.689905	93.1384	4	20.8722	10.9019
Q5XI86	Peptidyl-tRNA hydrolase 2 OS=Rattus norvegicus OX=10116 GN=Ptrh2 PE=1 SV=1 - [Q5XI86_RAT]	1	1	2	4				1.14324				1.37449				1.23555				1.19454				1.52973				1.34926				1.07742				1.11719				1.15073	28.8	3	19.5171	7.41553
P18420	Proteasome subunit alpha type-1 OS=Rattus norvegicus OX=10116 GN=Psma1 PE=1 SV=2 - [PSA1_RAT]	1	1	5	12	0.985277	1.07237	0.964239	0.857621	1.04594	1.3373	0.88981	1.13814	0.914137	1.04498	0.957406	0.973695	1.05461	1.21558	0.950432	1.07351	1.06915	1.01205	0.907584	1.56659	0.951052	0.979742	0.992622	0.90256	0.903969	0.96442	1.1126	0.720274	0.888257	1.00463	1.15125	1.2006	0.875419	1.06421	0.972613	0.987912	34.6609	1	29.4988	6.60986
Q920J4	Thioredoxin-like protein 1 OS=Rattus norvegicus OX=10116 GN=Txnl1 PE=1 SV=3 - [TXNL1_RAT]	2	1	5	15				0.778818				0.863303				1.23583				0.79993				1.10667				0.626769				1.06859				0.932386				0.972546	58.38	2	32.2288	4.95752
Q01129	Decorin OS=Rattus norvegicus OX=10116 GN=Dcn PE=1 SV=1 - [PGS2_RAT]	1	4	10	59	2.06649	1.38873	0.9063	1.18712	0.840687	0.870687	1.29288	0.613344	0.663404	0.754317	0.49564	0.962383	0.755751	0.947759	1.8041	0.686945	0.782951	1.07707	0.480006	0.673461	0.751756	1.08697	0.570295	0.558593	1.18811	1.30056	0.742432	0.918587	0.959557	1.46756	1.61251	0.756669	1.08903	0.911987	1.11774	1.00613	192.346	13	39.7799	8.79248
Q07969	Platelet glycoprotein 4 OS=Rattus norvegicus OX=10116 GN=Cd36 PE=1 SV=3 - [CD36_RAT]	8	6	10	89	1.01033	1.023	0.813247	0.709182	1.06251	1.20945	1.12723	1.06445	1.27914	1.14692	0.870974	0.561966	1.09599	1.21756	0.796736	0.660069	1.12254	1.07248	0.746807	0.977336	1.10348	1.13007	0.998195	0.545317	1.19476	0.918432	1.09678	1.03091	1.15563	0.787603	0.822814	1.12244	1.16344	1.06046	0.688946	1.00383	429.897	19	52.6973	8.55811
P61016	Cardiac phospholamban OS=Rattus norvegicus OX=10116 GN=Pln PE=1 SV=1 - [PPLA_RAT]	1	1	2	23	0.824202		0.826972		1.88348		0.561833		1.14537		0.696544		0.705743		0.897914		0.481307		0.730147		2.30675		0.924525		0.863441		1.98016		1.10261		1.05101		1.28544		0.815213		79.93	5	6.09034	8.80713
Q63081	Protein disulfide-isomerase A6 OS=Rattus norvegicus OX=10116 GN=Pdia6 PE=1 SV=2 - [PDIA6_RAT]	2	4	6	19	1.39901	1.06064	0.979925	1.25195	0.919804	0.97107	1.0716	1.12827	0.894138	0.939811	0.822242	1.00482	1.00642	0.948092	1.04298	1.09968	1.12038	0.890724	0.768466	1.53231	0.914488	1.15411	0.948979	0.826652	1.08104	1.08802	1.05166	0.984405	1.03986	0.728726	0.92518	0.967538	0.979176	1.00644	1.31695	1.47977	176.06	3	48.1433	5.13525
P41562	Isocitrate dehydrogenase [NADP] cytoplasmic OS=Rattus norvegicus OX=10116 GN=Idh1 PE=1 SV=1 - [IDHC_RAT]	1	2	10	32	1.02715	1.20647	0.971696	1.0504	0.99951	1.09531	0.791856	1.25032	1.12391	1.03474	0.956489	1.07465	1.0016	1.08613	0.91699	1.10677	0.97713	1.06094	0.812222	1.18854	0.953771	1.17245	1.14674	1.0486	1.05166	0.958013	0.885543	0.803478	0.934279	1.04474	0.561383	0.943058	0.792871	1.0908	1.02797	1.13361	141.468	6	46.7045	6.99072
F2Z3S5	RNA-binding protein, mRNA-processing factor OS=Rattus norvegicus OX=10116 GN=Rbpms PE=1 SV=3 - [F2Z3S5_RAT]	3	2	3	17		1.11523				0.740087				0.65754				0.861257				1.21647				1.08666				1.67547				2.23931				0.663221			59.59	4	22.5509	8.96826
Q921A4	Cytoglobin OS=Rattus norvegicus OX=10116 GN=Cygb PE=1 SV=1 - [CYGB_RAT]	1	2	3	6	1.78526		0.788746		1.04937		0.974111		0.985947		0.927427		1.00604		1.05866		1.11577		0.895264		0.974747		1.06287		1.28451		0.973968		1.00568		0.838814		1.06145		0.644663		72.28		21.483	6.80029
P04550	Parathymosin OS=Rattus norvegicus OX=10116 GN=Ptms PE=1 SV=2 - [PTMS_RAT]	1	1	2	12	2.02278	1.17284	0.870156	1.32641	1.01554	0.606401	0.849179	0.602853	0.473262	0.461901	0.770385	1.07223	0.369601	0.685091	1.78936	1.16477	0.443563	0.927505	1.01075	0.789823	0.514324	0.869597	0.500392	1.55549	0.975661	1.61216	0.713089	1.41098	0.695657	1.9077	1.74368	0.846231	0.68895	0.543506	1.06307	0.99883	89.27	2	11.5522	4.1958
A0A0H2UHI5	Ab1-233 OS=Rattus norvegicus OX=10116 GN=Serpina3n PE=1 SV=1 - [A0A0H2UHI5_RAT]	4	6	8	36	0.934502	0.691468	0.825991	1.0427	0.302753	0.698781	0.625852	0.918166	1.65243	0.456967	1.38631	0.8707	0.491666	1.03646	0.936791	0.746664	0.917876	0.904741	1.0778	0.977756	0.535173	1.07609	1.27923	0.772049	2.05316	1.13298	1.12829	0.944845	0.367289	1.61331	0.5443	1.34984	1.5034	1.03037	0.96454	0.910103	195.287	7	45.4526	5.46533
Q8CFN2	Cell division control protein 42 homolog OS=Rattus norvegicus OX=10116 GN=Cdc42 PE=1 SV=2 - [CDC42_RAT]	8	2	4	11		1.19004	1.056			1.09973	1.22013			1.24736	0.980852			1.11024	0.725778			1.14815	0.758446			1.15126	1.36735			1.04015	1.1121			0.683112	0.9125			1.11949	0.640922		75.5067	2	21.245	6.55127
F1M820	Sorbin and SH3 domain-containing protein 1 OS=Rattus norvegicus OX=10116 GN=Sorbs1 PE=1 SV=1 - [F1M820_RAT]	6	13	25	88	1.12702	0.968964	1.09221	1.01705	0.991286	0.786467	1.21582	0.848897	0.822156	0.794729	1.00106	1.09694	0.774823	0.991403	1.39907	0.819815	0.826692	1.04105	0.971731	0.836249	0.805963	1.04319	0.871824	1.01851	0.960306	0.918547	0.938841	1.0745	0.936058	1.775	1.45695	1.09585	0.952017	0.751249	1.02317	1.05019	357.239	21	143.279	8.22119
O08557	N(G),N(G)-dimethylarginine dimethylaminohydrolase 1 OS=Rattus norvegicus OX=10116 GN=Ddah1 PE=1 SV=3 - [DDAH1_RAT]	1	3	5	15	0.98864	0.698328	1.03637	0.988807	0.684417	0.577111	0.898582	0.671276	0.91614	1.44619	1.13891	1.92267	0.67012	0.576147	0.747574	1.59944	1.24489	0.726038	1.025	0.930909	1.28109	0.86169	0.900604	0.875558	1.08164	1.20808	0.699176	1.32265	0.604462	0.934495	0.862141	0.691691	0.882263	0.859874	1.02222	1.3615	135.93	5	31.4059	6.12549
Q7TP52	Carboxymethylenebutenolidase homolog OS=Rattus norvegicus OX=10116 GN=Cmbl PE=2 SV=1 - [CMBL_RAT]	1	3	5	17	0.768364	1.06845	0.841837	0.708332	1.03833	1.22747	1.00166	1.10777	1.2255	1.54888	1.10043	0.805918	1.10795	1.11192	0.557262	0.872071	1.24437	0.946731	1.05464	1.18202	1.14336	1.15163	1.32058	0.825343	0.953981	0.763614	1.14061	0.84254	1.17395	0.61155	0.721297	1.06916	1.07984	1.19424	0.787083	0.895298	123.062	3	27.885	6.7124
Q68FR9	Elongation factor 1-delta OS=Rattus norvegicus OX=10116 GN=Eef1d PE=1 SV=2 - [EF1D_RAT]	1	4	6	40	1.65905	1.05231	1.11888	1.28503	1.14876	0.762378	1.25141	0.723161	0.609936	0.72214	1.05088	1.33496	0.619369	0.916036	1.52208	0.973629	0.718938	0.980896	1.16221	1.00419	0.606808	1.07201	0.839695	1.21591	1.0332	1.57999	0.867123	1.06972	0.944047	1.81428	1.33195	0.883479	0.900825	0.844221	1.23379	1.28722	166.55	12	31.3109	5.05908
B0BNL2	Peptidyl-prolyl cis-trans isomerase OS=Rattus norvegicus OX=10116 GN=Pin1 PE=1 SV=1 - [B0BNL2_RAT]	1	1	2	11	1.64506	0.950586			1.00765	0.411338			0.884046	0.543921			0.641794	0.610787			0.789159	0.995076			0.832227	0.868606			0.996774	1.26691			0.959225	1.91187			1.17711	0.535437			43.04	3	18.321	8.82178
F1LQ14	60S ribosomal protein L34 OS=Rattus norvegicus OX=10116 GN=Rpl34 PE=4 SV=1 - [F1LQ14_RAT]	4	2	4	6			1.14505	0.696318			1.17606	1.26901			1.03007	0.605476			0.942789	1.1043			1.094	1.15429			1.08844	0.949168			1.1031	0.803832			0.893924	1.01864			1.05512	0.775627	35.37	2	13.3606	11.6636
P00173	Cytochrome b5 OS=Rattus norvegicus OX=10116 GN=Cyb5a PE=1 SV=2 - [CYB5_RAT]	1	2	3	8	0.952092	1.11674		1.2323	0.870179	0.829742		0.844348	1.11252	0.97857		0.906792	1.05472	0.894892		0.67992	1.07481	0.934677		0.954308	1.09922	1.27262		0.835452	1.21462	1.35566		1.07901	1.14488	0.803734		0.695622	1.02029	0.827625		1.28567	56.81	2	15.3456	4.98291
B5DF46	Phosphomannomutase OS=Rattus norvegicus OX=10116 GN=Pmm2 PE=1 SV=1 - [B5DF46_RAT]	2	2	4	22			1.27396	1.01453			1.12203	1.23676			1.27151	0.813072			1.22781	0.822503			0.814198	0.896308			1.2661	1.12265			1.44348	1.05562			1.16942	1.04252			0.899727	1.30158	111.55	7	27.6911	7.29834
Q5XIC0	Enoyl-CoA delta isomerase 2, mitochondrial OS=Rattus norvegicus OX=10116 GN=Eci2 PE=1 SV=1 - [ECI2_RAT]	1	2	9	28		1.03048	1.19004	0.658885		1.05418	1.02593	1.30571		1.12447	1.04545	0.824875		1.18528	0.736144	0.86737		1.12306	1.10644	1.32139		0.942699	1.25968	0.604228		0.538818	1.06462	0.749464		0.640338	0.827462	1.20599		1.09634	1.14436	0.890252	140.129	5	42.994	8.98291
P14046	Alpha-1-inhibitor 3 OS=Rattus norvegicus OX=10116 GN=A1i3 PE=1 SV=1 - [A1I3_RAT]	5	8	26	213	1.10978	0.953639	1.01065	0.960703	0.657819	1.71947	0.941772	1.20778	0.930801	0.908667	0.929847	1.09923	1.29359	1.08382	0.701403	0.651785	1.38532	0.901503	1.23604	0.742099	1.88926	1.23173	1.15371	0.815007	1.6806	0.945285	0.940704	0.957606	0.863983	0.805237	0.853042	0.872163	1.36325	1.07968	0.736524	0.674579	734.646	47	163.67	6.03662
Q6P2A5	GTP:AMP phosphotransferase AK3, mitochondrial OS=Rattus norvegicus OX=10116 GN=Ak3 PE=1 SV=1 - [Q6P2A5_RAT]	2	5	6	13	1.18201	1.26456	1.09354	1.1616	1.09539	0.795425	1.02336	0.968895	0.965979	0.996243	1.02207	0.863098	1.02319	0.862181	0.95002	1.57586	0.945558	1.09369	1.35606	1.01675	0.969362	0.892158	0.927192	0.977684	0.971466	0.725546	0.765019	0.852361	0.953895	0.722754	1.16077	1.03238	1.01732	0.890998	0.816293	0.834016	66.6945	2	25.4785	8.85107
Q6P9V6	Proteasome subunit alpha type OS=Rattus norvegicus OX=10116 GN=Psma5 PE=1 SV=1 - [Q6P9V6_RAT]	2	3	4	23	1.22162	1.17072	1.11381	1.30878	0.874805	1.01941	0.999436	1.0069	1.0328	0.999842	0.989854	1.19506	1.15134	1.09938	1.50335	1.10477	1.16886	1.0263	0.824916	1.23925	1.18958	1.04366	0.962123	1.01741	1.2501	1.0342	1.16598	1.13638	1.03485	1.24208	1.06765	1.14278	1.10264	1.09447	1.09801	1.20602	139.057	4	26.3942	4.79248
Q4QQV3	Protein FAM162A OS=Rattus norvegicus OX=10116 GN=Fam162a PE=2 SV=1 - [F162A_RAT]	1	1	4	14		0.993749	0.969205	1.05094		1.17879	0.970392	0.907423		1.17137	1.19713	0.995828		1.22679	0.971403	1.28819		1.00684	1.12434	1.06556		1.02123	1.04012	1.44832		1.04685	0.89592	0.968794		1.21508	1.09554	0.965641		0.910439	1.464	1.03133	63.0067	4	17.8155	9.99365
A0A0G2JSK5	Integrin beta OS=Rattus norvegicus OX=10116 GN=Itgb1 PE=1 SV=1 - [A0A0G2JSK5_RAT]	2	6	12	68	1.52061	1.13974	0.943481	1.19709	1.28221	1.14184	1.14267	0.972675	0.919855	0.980296	0.706755	0.634124	0.822195	0.968424	1.40466	0.956336	0.893734	0.785918	0.732048	1.02675	0.9103	1.12052	0.965492	0.731245	1.13572	1.20614	0.961025	0.953078	1.03747	0.940623	0.981701	0.863246	0.993229	0.985295	0.949602	1.19323	271.87	14	88.2864	6.01123
D4A197	Methylmalonyl CoA epimerase OS=Rattus norvegicus OX=10116 GN=Mcee PE=1 SV=1 - [D4A197_RAT]	1	2	3	17			1.0983	1.03879			0.832989	0.804879			0.890635	1.36044			1.54565	1.04536			1.12233	0.727501			0.697141	1.60295			0.769193	1.26146			1.58572	1.04393			1.18249	1.00692	69.55	3	18.8039	8.82178
P62628	Dynein light chain roadblock-type 1 OS=Rattus norvegicus OX=10116 GN=Dynlrb1 PE=1 SV=3 - [DLRB1_RAT]	1	1	2	3				1.21487				0.555895				1.36332				0.989442				0.759363				1.4373				1.20689				0.784288				1.06677	32.52	3	10.9828	7.25439
P24268	Cathepsin D OS=Rattus norvegicus OX=10116 GN=Ctsd PE=1 SV=1 - [CATD_RAT]	2	6	7	67	1.54916	1.02798	1.17298	0.977343	1.11216	0.922198	1.09879	0.98521	0.996661	0.98554	1.03301	1.08923	0.917745	0.763666	1.00794	0.657449	1.03128	1.07201	0.82966	0.860663	1.04767	1.11567	0.940605	0.514386	0.970186	0.880568	0.901087	0.848926	1.01047	1.31872	1.17014	0.873656	1.11542	0.95621	0.92165	1.11629	274.782	13	44.6519	7.09326
D3ZVB7	Osteoglycin OS=Rattus norvegicus OX=10116 GN=Ogn PE=1 SV=1 - [D3ZVB7_RAT]	1	5	6	34	1.48632	1.25016	1.10241	0.998197	0.745459	0.804102	1.06362	0.856331	0.702167	0.738961	0.665502	1.16059	0.762369	0.854397	1.41929	1.05352	0.718237	1.15018	0.733395	1.02202	0.920413	1.18296	0.692342	0.97163	1.12581	1.10674	0.900643	0.963121	0.912708	1.59824	1.85601	1.13675	1.08747	0.876808	1.40826	1.04958	158.9	9	34.0477	6.18896
M0R9K1	Heterogeneous nuclear ribonucleoprotein K-like OS=Rattus norvegicus OX=10116 GN=LOC100359916 PE=4 SV=2 - [M0R9K1_RAT]	3	7	10	71	1.52374	1.18964	1.10456	1.14912	0.907498	0.748606	1.05536	0.884941	0.78277	0.875693	0.874438	1.18538	0.814138	0.81087	1.29104	0.852899	0.884334	0.969991	0.81424	0.953829	0.833099	1.09065	0.80329	0.765281	1.00775	1.07115	0.914429	1.08941	0.986158	1.56771	1.18542	0.998437	1.0129	0.887147	1.22242	1.11152	434.14	18	50.9374	5.37646
B1WC61	Acad9 protein OS=Rattus norvegicus OX=10116 GN=Acad9 PE=1 SV=1 - [B1WC61_RAT]	1	5	10	29	0.696173	1.00375	1.2441	0.656395	1.21767	1.09534	1.03143	1.28065	1.40345	1.13214	1.13857	0.665892	1.41488	0.942004	0.723518	1.05305	1.0434	1.10237	1.1515	0.967638	1.0549	1.00226	1.2185	0.75456	1.15838	0.616659	1.11236	0.816598	1.47098	0.552929	0.95892	0.932559	1.10443	1.06068	0.998722	1.02151	118.37	4	68.7997	7.69385
B2GV15	Dihydrolipoamide acetyltransferase component of pyruvate dehydrogenase complex OS=Rattus norvegicus OX=10116 GN=Dbt PE=1 SV=1 - [B2GV15_RAT]	1	6	10	45	0.708285	0.952948	0.995032	0.932776	1.04267	1.05588	1.09137	1.61869	1.20513	1.22843	0.956635	1.11865	1.14061	1.11149	1.11287	1.17704	1.16465	0.900023	0.827414	1.33929	1.38748	1.0851	1.1629	0.730127	1.02664	0.677462	1.37842	0.774007	1.13089	0.667136	1.15002	1.20662	1.01249	1.11128	1.02777	1.10218	112.757	11	53.24	8.41162
P41498	Low molecular weight phosphotyrosine protein phosphatase OS=Rattus norvegicus OX=10116 GN=Acp1 PE=1 SV=3 - [PPAC_RAT]	3	2	3	11	1.50431	1.0304			0.958156	0.920229			0.809424	0.914483			0.806683	0.891149			0.792784	1.07274			0.696366	0.942168			0.839988	0.948973			1.08882	1.34547			0.794167	0.799143			55.4	3	18.1398	6.52197
Q62920	PDZ and LIM domain protein 5 OS=Rattus norvegicus OX=10116 GN=Pdlim5 PE=1 SV=2 - [PDLI5_RAT]	1	7	11	75	0.978303	0.94218	1.12091	1.39792	1.28951	0.803355	0.939934	0.730984	0.683389	0.824577	0.943484	1.54834	0.520177	0.982398	1.35255	1.31502	0.435745	1.24519	1.33302	0.370319	0.735982	0.962028	0.716219	1.60458	0.665443	1.28034	0.774448	1.2198	0.787636	2.33931	1.38677	0.736379	0.890207	0.820912	0.956806	1.00437	342.37	17	63.1612	8.38232
Q9Z2J4	Nexilin OS=Rattus norvegicus OX=10116 GN=Nexn PE=1 SV=1 - [NEXN_RAT]	2	2	12	33	1.54872	1.16452	0.827286		1.06728	0.894902	1.20046		0.770831	0.886023	0.939807		0.687956	1.00034	0.965851		0.721945	1.15259	0.923806		0.552899	0.990629	0.8528		0.95624	1.45233	1.13041		0.986536	2.00346	1.02376		0.976954	0.707548	0.636798		92.005		78.3453	5.36377
F1LPS8	Transcriptional activator protein Pur-alpha OS=Rattus norvegicus OX=10116 GN=Pura PE=1 SV=3 - [F1LPS8_RAT]	2	1	3	5																																					61.47	2	31.884	8.5874
A9UMV7	RCG29512 OS=Rattus norvegicus OX=10116 GN=Uqcr11 PE=1 SV=1 - [A9UMV7_RAT]	1	1	1	16			0.841745	0.808056			0.95806	1.04537			1.38187	0.783596			0.963986	1.22051			0.911336	1.29745			1.2885	1.47533			1.14504	1.06355			0.933416	1.20156			1.03727	0.983228	51.3033	3	6.53444	9.70068
Q6PCT8	Succinate dehydrogenase [ubiquinone] cytochrome b small subunit, mitochondrial OS=Rattus norvegicus OX=10116 GN=Sdhd PE=2 SV=1 - [DHSD_RAT]	1	1	2	16		0.677782	1.48684	0.846114		0.810445	1.39885	1.69051		1.83755	1.62316	0.58611		0.901799	0.635772	1.11598		0.821407	1.19604	1.26706		0.754497	1.72659	1.32254		0.998233	1.71517	1.47111		0.658697	1.27623	1.17818		1.36787	1.58425	1.26297	71.6667	5	16.9649	9.29053
X1WI37	40S ribosomal protein S4 OS=Rattus norvegicus OX=10116 GN=Rps4x PE=3 SV=1 - [X1WI37_RAT]	4	5	6	21	0.647127	0.773795	1.2114		0.941448	1.11669	1.21188		1.2107	1.23294	0.999061		1.56894	1.22602	0.583733		1.43639	1.16506	0.975811		1.28549	0.756509	1.25676		0.952472	0.6577	1.17302		1.0343	0.687099	0.842039		1.2407	1.23314	1.14072		131.159	4	29.448	10.1548
A0A0G2JZH8	Dihydrolipoamide acetyltransferase component of pyruvate dehydrogenase complex OS=Rattus norvegicus OX=10116 GN=Pdhx PE=1 SV=1 - [A0A0G2JZH8_RAT]	2	9	10	68	0.930127	1.02923	0.969996	0.928201	0.991255	0.874048	1.13971	1.01047	1.0224	0.995639	1.10188	1.05378	0.914365	1.09984	1.09546	0.997264	0.930528	0.901639	1.01612	0.927884	0.827323	1.06961	1.06162	0.918514	1.0132	0.908997	1.01535	0.964329	1.01573	1.1587	0.97283	1.07621	0.962997	1.00365	1.12247	1.141	365.529	16	54.1356	8.74854
D4A7L4	NADH dehydrogenase (Ubiquinone) 1 beta subcomplex, 11 (Predicted) OS=Rattus norvegicus OX=10116 GN=Ndufb11 PE=1 SV=1 - [D4A7L4_RAT]	1	2	2	33	1.09943	0.986096	0.866083	0.871483	1.08463	1.01671	1.02727	1.01914	1.06215	1.08583	1.00003	0.758038	1.00295	1.06611	1.03819	0.907943	1.0073	1.01626	0.886053	1.16372	0.919049	0.998793	1.20469	0.851394	1.03799	0.992493	1.12598	0.902622	1.06393	0.724894	1.20277	0.903071	1.05004	0.971076	1.03421	1.15743	88.49	10	17.6229	5.23682
A0A1W2Q6E9	Moesin OS=Rattus norvegicus OX=10116 GN=Msn PE=1 SV=1 - [A0A1W2Q6E9_RAT]	5	4	11	48	0.908643	1.05448	0.94762		0.862491	1.13903	0.981621		1.04468	0.746377	0.971566		1.04081	0.921041	0.882851		1.00444	1.1474	0.781342		0.983288	1.19452	0.978452		1.05899	0.7003	0.963499		0.981594	0.694577	1.09455		0.96163	1.38062	0.953369		157.73	10	67.6098	6.46826
F1LWK7	Uncharacterized protein (Fragment) OS=Rattus norvegicus OX=10116 PE=1 SV=3 - [F1LWK7_RAT]	3	1	9	35		1.37229	1.22838			1.43701	0.894242			1.37772	0.833457			1.43569	0.809111			1.20374	0.71211			1.18522	1.19269			0.638446	1.13323			0.949386	1.04822			1.16887	0.753723		105.829	7	67.0295	8.51416
D3ZTH8	Similar to 60S ribosomal protein L23a OS=Rattus norvegicus OX=10116 GN=LOC689899 PE=3 SV=1 - [D3ZTH8_RAT]	3	1	4	7																																					40.7		17.7421	10.3892
Q6AYH5	Dynactin subunit 2 OS=Rattus norvegicus OX=10116 GN=Dctn2 PE=1 SV=1 - [DCTN2_RAT]	2	5	8	23	1.70153		0.98905	1.16469	1.03857		1.13949	0.967896	0.919035		0.941018	1.18175	0.6984		1.45934	1.28788	0.738243		0.975302	1.07657	0.921995		0.917649	1.15712	1.1035		0.961352	1.01448	0.924471		1.16783	1.04696	0.901505		1.04647	1.18963	73.58	5	44.1207	5.26221
Q3V5X8	Endonuclease G OS=Rattus norvegicus OX=10116 GN=Endog PE=1 SV=1 - [Q3V5X8_RAT]	1	2	5	19		0.812962	1.19143	0.747477		0.825028	1.35012	0.904959		1.09866	0.882352	1.29111		1.06346	1.1989	0.89832		1.15553	1.34904	0.501631		0.685187	1.11991	0.818895		0.600787	0.922559	0.754964		1.06986	1.09961	0.922553		0.886251	0.331637	0.636035	92.37	5	32.2478	9.51025
Q9QX80	CArG-binding factor A OS=Rattus norvegicus OX=10116 GN=Hnrnpab PE=1 SV=1 - [Q9QX80_RAT]	2	4	5	37	1.68274	0.98201	0.965023	1.09567	1.04058	0.754369	1.17375	0.680298	0.636963	0.634448	1.00264	1.30788	0.604116	0.817418	1.38076	0.962896	0.601187	1.08227	1.04104	0.647876	0.655757	0.936408	0.711606	1.17894	0.917162	1.325	0.843528	1.26027	0.8371	2.2344	1.42962	0.993171	0.85164	0.658717	0.930553	1.05037	151.559	8	30.8343	7.91357
Q64057	Alpha-aminoadipic semialdehyde dehydrogenase OS=Rattus norvegicus OX=10116 GN=Aldh7a1 PE=1 SV=2 - [AL7A1_RAT]	1	6	9	27	0.601898	0.933949	0.967864	0.574912	0.93405	1.21182	1.11757	1.47629	1.27435	1.25936	1.06479	0.610506	1.44185	1.18142	0.492915	1.05908	1.3416	1.17143	1.01256	1.49075	1.24493	0.884669	1.29112	0.498929	1.00221	0.538395	1.05772	0.739886	1.14224	0.472235	0.706165	1.26061	1.10347	1.31146	1.00618	1.08202	179.98	3	58.7114	7.86963
Q9EPX0	Heat shock protein beta-8 OS=Rattus norvegicus OX=10116 GN=Hspb8 PE=1 SV=1 - [HSPB8_RAT]	1	1	4	9				1.16408				0.859871				1.2591				1.28657				0.763992				1.38539				1.32796				0.914756				1.19272	29.4	3	21.5787	5.021
Q6AYQ8	Acylpyruvase FAHD1, mitochondrial OS=Rattus norvegicus OX=10116 GN=Fahd1 PE=1 SV=1 - [FAHD1_RAT]	1	1	4	6				1.18734				0.961361				1.04418				1.15685				0.728314				1.29005				1.10195				1.00779				0.85707	44.86	2	24.4646	7.73779
A0A0G2JT00	Divalent cation tolerant protein CUTA, isoform CRA_c OS=Rattus norvegicus OX=10116 GN=Cuta PE=1 SV=1 - [A0A0G2JT00_RAT]	3	1	2	14	1.67798	1.00067	0.917792	1.16887	1.02016	0.737747	0.819745	0.709304	0.589692	0.752275	0.800623	1.38628	0.525954	0.972671	1.68652	0.998493	0.630349	0.973908	0.832396	0.78477	0.694942	1.21456	0.642272	1.07741	0.840516	1.33066	0.824651	0.980461	0.803033	1.4665	1.50899	0.739544	0.713926	0.649757	1.17945	1.16931	101.244	3	16.4026	6.771
P82995	Heat shock protein HSP 90-alpha OS=Rattus norvegicus OX=10116 GN=Hsp90aa1 PE=1 SV=3 - [HS90A_RAT]	1	4	14	91	0.847529	1.37347	1.01759	1.04974	1.10573	1.45614	0.883174	0.998729	1.54268	1.21511	0.890502	1.2361	1.43304	1.12186	1.10455	1.02644	1.40408	1.25757	1.30596	1.08392	1.31593	1.11286	0.805481	1.15517	1.08012	1.09162	0.844046	0.855354	1.10611	1.07346	1.17632	1.18756	1.3108	1.26374	1.27899	1.04363	543.287	19	84.7618	5.0083
Q5XIB3	[Protein ADP-ribosylarginine] hydrolase-like protein 1 OS=Rattus norvegicus OX=10116 GN=Adprhl1 PE=2 SV=1 - [ARHL1_RAT]	2	3	5	20	0.609511	0.927569	0.930815	0.605625	0.819242	1.03955	1.04406	1.39819	1.3248	1.30087	1.18413	0.641385	1.08784	1.21132	0.58468	1.06017	1.25401	1.11918	0.999894	1.07517	1.06906	0.902936	1.37625	0.706716	0.881684	0.676134	1.21198	0.914471	1.17582	0.517798	0.828447	1.13947	1.06026	1.11142	0.806513	0.943151	85.84	5	39.8515	6.16357
Q5EBC0	Inter alpha-trypsin inhibitor, heavy chain 4 OS=Rattus norvegicus OX=10116 GN=Itih4 PE=1 SV=1 - [Q5EBC0_RAT]	2	10	14	39	1.28366	1.0288	0.629581	1.14198	0.956054	1.59095	0.594035	1.44459	1.08484	1.16271	0.892649	0.907231	1.57314	1.15348	0.612267	1.2387	1.63932	1.2445	0.82355	1.16928	1.66855	1.17859	0.840279	0.963579	1.88007	1.08959	0.663116	1.1759	1.07073	0.958087	0.511513	1.10575	1.62337	1.25921	0.82621	1.02508	268.61	4	103.691	6.20166
P0C5I0	Cerebral dopamine neurotrophic factor OS=Rattus norvegicus OX=10116 GN=Cdnf PE=3 SV=1 - [CDNF_RAT]	1	2	4	12		1.25506	1.07742	1.31324		0.623225	1.13933	0.616476		0.67618	1.20645	1.61065		0.903862	1.63299	1.0944		0.734207	0.982418	0.44333		0.825909	0.858776	1.38235		1.74412	0.866364	1.09589		1.45275	1.20699	0.961734		0.576725	0.42364	1.42666	69.9767	3	21.3468	6.85889
G3V6D9	Na(+)/H(+) exchange regulatory cofactor NHE-RF OS=Rattus norvegicus OX=10116 GN=Slc9a3r2 PE=1 SV=1 - [G3V6D9_RAT]	2	1	5	9																																					46.2533	5	37.3279	7.57666
Q03626	Murinoglobulin-1 OS=Rattus norvegicus OX=10116 GN=Mug1 PE=2 SV=1 - [MUG1_RAT]	4	6	25	179	0.859671	0.992329	0.813056	0.646808	0.632811	1.86644	0.92072	1.0472	1.11745	0.984487	0.83186	0.722998	1.58616	1.2189	0.666489	0.554776	1.57666	0.952244	1.05899	1.09224	1.70063	0.957035	0.87252	0.60407	1.78801	0.916857	0.72278	0.81816	0.943323	0.823695	0.634866	0.91158	1.64812	1.2119	0.909282	0.671879	689.908	37	165.221	6.01123
F1LSW7	60S ribosomal protein L14 OS=Rattus norvegicus OX=10116 GN=Rpl14 PE=1 SV=2 - [F1LSW7_RAT]	4	3	4	13	0.730633	0.783166	1.11776	0.666828	0.987258	1.13911	1.24748	1.22866	1.10101	1.28667	0.970153	0.549929	1.26587	1.1739	0.454786	1.04013	1.27773	1.20545	1.13089	1.27998	1.22868	0.651517	1.224	0.849485	0.93875	0.645281	1.14576	0.718496	1.00687	0.580511	0.833356	1.09453	1.16739	1.22372	1.17918	0.859644	137.553	1	23.308	11.0044
Q6GMN8	Actn1 protein OS=Rattus norvegicus OX=10116 GN=Actn1 PE=1 SV=1 - [Q6GMN8_RAT]	6	2	20	162	0.759085	0.744195	0.976395	0.757864	0.837223	1.17625	1.27129	1.13213	0.883935	1.01315	0.793553	0.697499	1.23241	1.14612	0.592809	0.962463	1.15509	1.07243	1.01459	1.09853	1.00185	0.7706	0.994855	0.675336	0.848563	1.0273	1.01531	0.703733	1.04071	0.745669	0.645807	1.14474	1.19906	1.12271	1.2657	0.774512	547.283	29	102.547	5.47803
F1M013	60S ribosomal protein L7a OS=Rattus norvegicus OX=10116 GN=Rpl7a PE=4 SV=2 - [F1M013_RAT]	15	4	5	20	0.869602	0.743001	1.213	0.542796	1.11919	1.20046	1.35563	1.16254	1.08973	1.25808	1.17233	0.533042	1.10928	1.24717	0.622522	1.10906	1.29681	1.1798	1.19445	1.20765	1.1916	0.732275	1.31963	0.880822	0.899528	0.684807	1.3277	0.778623	0.957415	0.603682	0.928122	1.34067	1.23679	1.22947	1.20211	0.855897	114.307	2	29.846	10.6089
Q5XIG9	Mitochondrial fission process 1 OS=Rattus norvegicus OX=10116 GN=Mtfp1 PE=1 SV=1 - [Q5XIG9_RAT]	1	1	2	3																																					43.7133		18.3547	9.45166
P41565	Isocitrate dehydrogenase [NAD] subunit gamma 1, mitochondrial OS=Rattus norvegicus OX=10116 GN=Idh3g PE=1 SV=2 - [IDHG1_RAT]	2	4	7	47	0.688888	1.09772	1.05411	0.662413	1.23996	1.24877	1.00373	1.31705	1.17597	1.26698	1.14134	0.760363	1.37243	1.23607	0.577268	0.934171	1.20329	1.00844	1.23768	1.00831	1.21805	0.961503	1.23616	0.770091	1.08692	0.766962	1.12843	0.797798	1.17046	0.582041	0.722751	1.0295	0.996528	1.16715	0.63306	0.961061	160.098	11	42.8242	8.89502
P35908	SWISS-PROT:P35908 Tax_Id=9606 Gene_Symbol=KRT2 Keratin, type II cytoskeletal 2 epidermal	10	8	9	15	0.230555	0.909465	0.67397		1.19538	0.643177	1.05215		1.66797	0.624764	1.09559		0.868194	0.625172	2.02791		0.428419	0.919712	2.10551		0.181319	2.81276	1.54415		4.62591	0.792847	0.620858		0.214597	1.52512	0.367187		0.486178	1.3739	1.81626		116.79		65.8254	8.00146
Q2PS20	Junctophilin-2 OS=Rattus norvegicus OX=10116 GN=Jph2 PE=1 SV=1 - [JPH2_RAT]	1	5	11	44	0.774973	0.936947	1.12009	0.834409	1.01062	1.14099	0.989053	1.3446	1.02549	1.25937	0.974061	1.09326	1.16526	1.02654	0.870967	0.862953	1.06259	1.0911	0.722237	1.49088	1.23933	0.985607	0.975589	0.922397	1.01835	0.730978	1.05983	1.12044	1.20616	1.11128	1.05916	1.1578	1.17271	1.06693	1.19173	1.01962	153.303	8	74.2134	8.36768
A0A0G2JXC3	40S ribosomal protein S21 OS=Rattus norvegicus OX=10116 GN=Rps21 PE=1 SV=1 - [A0A0G2JXC3_RAT]	3	1	2	27	1.87672	1.10231	1.14852		1.07335	0.716784	0.978249		0.575061	0.575929	1.01518		0.459138	0.767679	1.98993		0.48178	0.978058	1.03605		0.459511	0.802824	0.49493		0.746344	1.25301	0.721528		0.673917	1.66729	1.7126		0.722324	0.647032	1.61941		55.38	7	8.86043	8.51416
D3ZY71	RCG21156 OS=Rattus norvegicus OX=10116 GN=NEWGENE_1586233 PE=1 SV=1 - [D3ZY71_RAT]	1	2	2	12	1.29914	1.01277	1.04714	1.51558	1.1518	0.494024	0.871974	0.497374	0.582819	0.5186	1.24491	1.34681	0.402247	0.758502	2.29312	1.36302	0.449386	1.04627	1.10182	0.181326	0.538441	0.818275	0.548259	2.28538	1.09806	2.08375	0.802142	1.59273	0.67426	2.18221	1.85417	0.865059	0.589326	0.478812	0.279105	1.08767	62.6433	3	8.7501	5.47803
D3ZKU6	Uncharacterized protein OS=Rattus norvegicus OX=10116 GN=Gbp1 PE=4 SV=2 - [D3ZKU6_RAT]	1	2	8	32	0.981436	1.10592	1.27647	0.99645	0.570862	1.09269	0.918486	1.62545	0.934259	0.646468	1.09439	0.661626	1.48137	1.24182	1.6487	1.88652	1.10316	1.22631	0.983679	0.99511	1.54091	0.933229	0.940366	0.955343	0.4738	1.24361	1.34553	0.920509	0.442368	0.974012	1.08484	0.759938	0.610433	1.5456	1.10579	1.34782	132.26	8	68.3719	5.99854
Q5RKI1	Eukaryotic initiation factor 4A-II OS=Rattus norvegicus OX=10116 GN=Eif4a2 PE=1 SV=1 - [IF4A2_RAT]	3	2	5	19		1.09015		0.858724		1.10232		1.02228		1.03774		0.745401		0.94551		1.08848		1.10325		1.15238		0.934285		1.05762		1.0148		0.883104		0.834768		0.911793		1.04866		0.957944	90.3343	7	46.3728	5.47803
G3V640	Mitochondrial import inner membrane translocase subunit TIM44 OS=Rattus norvegicus OX=10116 GN=Timm44 PE=1 SV=1 - [G3V640_RAT]	2	4	7	27	0.826445			0.84365	1.30937			1.2415	0.996421			0.69801	1.07268			1.14466	0.979931			1.10442	0.984015			1.08574	1.2521			1.01195	1.18423			1.14316	0.879854			1.10203	95.735	6	51.0284	8.30908
G3V7U4	Lamin-B1 OS=Rattus norvegicus OX=10116 GN=Lmnb1 PE=1 SV=1 - [G3V7U4_RAT]	3	4	10	22	1.16042	1.1067	1.10731		0.927998	0.941999	1.2604		0.947159	1.2332	0.960862		1.03809	1.0513	1.26988		1.11905	1.05913	0.911847		1.06057	1.2994	0.87428		0.951191	0.80809	1.10509		1.06037	1.35993	1.02709		1.24119	1.04052	1.07166		111.26	4	66.6457	5.16064
Q3B8N9	Biphenyl hydrolase-like OS=Rattus norvegicus OX=10116 GN=Bphl PE=1 SV=1 - [Q3B8N9_RAT]	1	3	4	10		1.19589	1.28744	0.862431		0.917591	1.00571	1.25864		1.0429	0.846996	1.38126		1.00698	1.02332	1.44696		1.06605	1.34695	0.873585		0.951631	1.15436	1.35678		0.904687	0.798746	0.874195		0.902342	1.2163	1.19384		0.872194	1.4178	1.04128	60.92	3	32.8021	8.79248
Q68FU7	Ubiquinone biosynthesis monooxygenase COQ6, mitochondrial OS=Rattus norvegicus OX=10116 GN=Coq6 PE=2 SV=1 - [COQ6_RAT]	1	4	7	55	2.40193	1.07398	1.32093	1.12815	1.54767	1.62892	0.893938	0.872558	1.08526	0.709293	0.90314	1.24077	1.16348	0.792497	1.2397	1.05089	0.975502	0.986104	0.937096	0.929168	0.900995	1.55048	1.0669	1.11573	1.01251	0.84606	1.29918	1.12772	1.03369	0.627797	1.15008	1.15309	0.92264	1.10208	1.13619	0.979577	101.65	13	51.4631	7.21045
G3V615	Complement factor B OS=Rattus norvegicus OX=10116 GN=Cfb PE=1 SV=1 - [G3V615_RAT]	3	2	12	35				1.18778				1.16385				1.26049				0.759694				1.1814				1.10318				1.45414				1.18011				0.904779	90.59	9	85.2987	6.96143
A0A0U1RVI9	RCG34378, isoform CRA_h OS=Rattus norvegicus OX=10116 GN=rCG_34378 PE=3 SV=1 - [A0A0U1RVI9_RAT]	9	2	5	14	0.572387	0.861933	1.11404		0.989003	1.10777	1.12292		1.1748	1.28936	1.15772		1.50273	1.17574	0.586624		1.52962	1.13354	1.10061		1.33912	0.821434	1.10947		0.865562	0.618105	1.1129		1.05663	0.606844	0.847291		1.2337	1.25445	0.776151		85.03	2	28.5712	9.75928
F1M635	Limb bud and heart development OS=Rattus norvegicus OX=10116 GN=Lbh PE=1 SV=3 - [F1M635_RAT]	2	1	1	9		1.11939	0.966483			0.671149	1.03106			0.616397	1.11758			0.915065	1.84925			1.27595	1.07565			1.04978	0.788223			1.65146	0.784427			1.7082	2.08919			0.620877	1.40764		49.41	3	10.1457	4.29736
Q9Z270	Vesicle-associated membrane protein-associated protein A OS=Rattus norvegicus OX=10116 GN=Vapa PE=1 SV=3 - [VAPA_RAT]	2	1	4	12	0.831793				1.25096				1.3815				1.2096				1.14607				1.15654				1.14293				1.15973				0.834976				34.24	2	27.8233	8.39697
P62142	Serine/threonine-protein phosphatase PP1-beta catalytic subunit OS=Rattus norvegicus OX=10116 GN=Ppp1cb PE=1 SV=3 - [PP1B_RAT]	5	1	6	12		1.13531	1.04457			1.3805	1.09377			1.30167	1.13712			1.24971	0.649878			1.19687	1.03871			0.84886	1.35242			0.846296	1.18531			0.846617	0.907884			1.21647	0.626772		39.31	3	37.1626	6.18896
D3ZXF9	Mitochondrial ribosomal protein L12 OS=Rattus norvegicus OX=10116 GN=Mrpl12 PE=1 SV=1 - [D3ZXF9_RAT]	1	4	6	51	1.56618	1.26701	1.07078	1.57868	1.30519	0.58309	0.845835	0.601683	0.51598	0.58196	0.916428	1.59514	0.507216	0.667634	1.80328	1.0392	0.567166	0.89643	1.00816	0.745977	0.613462	0.752409	0.481227	1.49502	0.962157	1.67879	0.801642	1.48626	0.778087	1.49609	1.76315	0.725423	0.651009	0.475846	1.30872	1.06916	202.974	13	29.4229	9.65674
P24049	60S ribosomal protein L17 OS=Rattus norvegicus OX=10116 GN=Rpl17 PE=2 SV=3 - [RL17_RAT]	5	1	3	4		0.80961				1.00396				1.03635				1.20476				1.1294				0.991914				0.722717				0.881846				1.25972			33.8333		21.3834	10.1841
D4AE56	Prostaglandin E synthase 2 OS=Rattus norvegicus OX=10116 GN=Ptges2 PE=1 SV=1 - [D4AE56_RAT]	1	3	5	33	0.800353	1.07315	1.0597	0.934595	1.12035	1.2132	0.774717	1.18944	1.03023	1.16483	1.05531	0.775489	1.05236	1.0481	0.762601	1.22432	0.965451	0.968714	1.10466	0.938415	1.10113	1.08578	1.06034	1.058	0.96278	1.02917	1.0018	0.904059	1.00797	0.790253	0.8987	1.02072	0.902643	1.14667	1.22951	1.02509	112.103	8	43.4242	9.24658
P04904	Glutathione S-transferase alpha-3 OS=Rattus norvegicus OX=10116 GN=Gsta3 PE=1 SV=3 - [GSTA3_RAT]	5	1	4	10		0.99073				0.933799				0.694243				0.993822				0.919884				0.885559				0.870316				0.994147				1.07861			39.6	1	25.3033	8.74854
Q6P3V9	60S ribosomal protein L4 OS=Rattus norvegicus OX=10116 GN=Rpl4 PE=1 SV=1 - [Q6P3V9_RAT]	2	4	6	20	0.486203	0.80919	1.2376	0.597444	1.10235	1.18492	1.3272	1.3524	1.27237	1.28464	0.992456	0.571016	1.45943	1.20861	1.10765	0.954825	1.50747	1.16261	1.10465	1.08111	1.35799	0.68528	1.10672	0.550553	0.933207	0.594958	1.07198	0.768521	1.00236	0.697642	1.37209	1.36061	1.3652	1.20297	1.22812	0.83311	137.484	3	47.2711	11.019
D4A500	HD domain containing 3 (Predicted), isoform CRA_b OS=Rattus norvegicus OX=10116 GN=Hddc3 PE=1 SV=1 - [D4A500_RAT]	1	1	2	6	1.03253	1.51884	0.880376		0.984119	1.77004	1.0049		0.619152	0.96082	0.853494		0.776169	1.34815	1.20807		0.674025	1.21636	0.941313		0.713131	1.45032	1.04506		1.07041	1.85878	0.950456		0.992039	2.25667	1.36881		0.759535	1.33054	1.05333		54.92		20.2415	6.15088
F8WFH8	Tryptophan--tRNA ligase, cytoplasmic OS=Rattus norvegicus OX=10116 GN=Wars PE=1 SV=1 - [F8WFH8_RAT]	3	2	6	17	1.04806	0.963029	1.34457	1.08489	0.926981	1.11396	0.741653	1.30356	0.974646	1.04885	1.28354	1.00976	1.09486	0.967905	0.945459	1.33403	1.2586	1.03502	1.14716	1.32631	1.18799	1.23901	1.23533	1.06367	0.761792	1.01033	1.16073	0.996204	0.860379	1.14461	0.913833	0.888686	0.948717	1.35598	0.881934	1.26286	77.54	4	53.3927	6.60986
P35527	SWISS-PROT:P35527 Tax_Id=9606 Gene_Symbol=KRT9 Keratin, type I cytoskeletal 9	1	6	6	27	0.352529	0.710518	0.213193	0.584567	1.08671	1.19502	1.41431	8.97745	0.831735	1.03245	0.992121	0.900377	0.570995	0.447235	1.00161	8.17872	0.223212	0.720898	1.17065	0.466373	0.382927	1.55179	2.89746	2.02382	5.53969	0.760577	0.419653	0.559231	0.391272	1.19143	0.323415	0.871504	0.440174	1.13572	1.04941	0.368857	271.86	6	62.0919	5.30029
Q5RJR9	Serine (Or cysteine) proteinase inhibitor, clade H, member 1, isoform CRA_b OS=Rattus norvegicus OX=10116 GN=Serpinh1 PE=1 SV=1 - [Q5RJR9_RAT]	2	2	6	20	0.633891	0.844478	1.31627	0.603033	0.850696	1.10062	1.13701	1.21898	0.892899	1.25616	1.19244	1.1742	0.96285	1.05347	0.974933	0.840078	0.993999	1.00233	1.08233	1.4059	1.09633	0.780482	1.22053	0.875425	0.790948	0.836478	1.02623	0.743385	0.929555	0.79984	0.961044	1.08496	1.03786	1.16158	1.24588	0.953073	115.15	3	46.5322	8.82178
Q91ZW1	Transcription factor A, mitochondrial OS=Rattus norvegicus OX=10116 GN=Tfam PE=2 SV=1 - [TFAM_RAT]	1	2	4	13			0.986756				0.831693				1.04521				0.835464				1.31184				0.838086				0.742285				0.797326				1.1131		32.04	5	28.1688	9.74463
A0A0G2JUT0	Heat shock-related 70 kDa protein 2 OS=Rattus norvegicus OX=10116 GN=Hspa2 PE=1 SV=1 - [A0A0G2JUT0_RAT]	4	1	13	179			0.993482				1.04272				1.05773				0.755162				0.989735				1.07639				1.00397				0.742011				0.866661		824.209	44	66.0149	5.64307
M0R5K3	RCG54339, isoform CRA_c OS=Rattus norvegicus OX=10116 GN=LOC687508 PE=4 SV=1 - [M0R5K3_RAT]	1	1	2	17	0.775173	0.855377	1.03421	1.30709	1.1552	0.809052	0.863195	1.2112	1.20544	1.10962	1.40349	0.709006	0.936384	1.11891	1.20657	1.94707	0.889282	0.813539	1.66659	1.16317	0.841468	0.794821	1.157	2.05745	0.811516	0.951036	1.04955	0.86993	0.964476	0.530852	0.915257	1.00063	0.902719	1.02663	1.05773	0.911256	171.307	4	9.02169	10.0083
F1LYS7	Sarcoglycan, delta OS=Rattus norvegicus OX=10116 GN=Sgcd PE=4 SV=3 - [F1LYS7_RAT]	1	1	5	12																																					47.16	3	32.0669	9.1001
Q9ESS6	Basal cell adhesion molecule OS=Rattus norvegicus OX=10116 GN=Bcam PE=2 SV=1 - [BCAM_RAT]	1	6	9	27	1.24151	1.03421	0.608172		0.985512	0.767183	1.35229		1.16994	0.884211	0.813394		1.14014	0.957349	0.774083		1.15834	0.969913	0.906311		0.929066	0.947708	1.05825		1.35491	1.11896	0.924728		1.08945	1.03537	0.424912		1.1422	0.913619	0.901		105.198	3	67.4694	5.78271
G3V836	Clusterin OS=Rattus norvegicus OX=10116 GN=Clu PE=1 SV=1 - [G3V836_RAT]	3	5	8	30	2.62054	1.32137	0.82899	1.08368	0.782975	0.841916	1.18686	0.788186	0.71645	0.640728	0.945664	0.931315	0.488154	0.850583	1.81147	0.767588	0.728669	1.05426	1.02659	0.947413	0.62385	1.11732	0.742821	0.916147	1.17675	1.15068	0.772822	1.22981	0.734326	1.93233	1.28115	0.98399	1.00027	0.819623	1.36294	1.20282	161.957	6	51.3873	5.80811
P10959	Carboxylesterase 1C OS=Rattus norvegicus OX=10116 GN=Ces1c PE=1 SV=3 - [EST1C_RAT]	4	2	7	26	1.20784	0.725197	1.10963	1.5817	1.05604	0.538595	1.16099	1.42995	0.450863	0.535931	1.44421	0.936211	0.830856	0.514487	2.49304	1.09868	1.29875	0.632756	1.70615	1.59101	1.26432	0.611467	1.40263	1.30083	1.24303	0.587959	1.12181	1.29481	0.857339	0.653873	0.829745	1.36617	1.00434	0.556637	2.36056	1.33543	92.61	8	60.1365	5.73193
P01041	Cystatin-B OS=Rattus norvegicus OX=10116 GN=Cstb PE=1 SV=1 - [CYTB_RAT]	1	1	2	16	1.46393	1.14787	1.0073	1.10105	0.981732	0.888968	1.07402	0.836187	0.949753	0.701225	1.02567	1.27683	0.728654	0.893481	1.21829	0.979719	0.75152	0.903217	1.13442	0.816391	0.719319	1.00431	0.825497	1.15535	0.890088	1.21632	0.937159	1.20538	0.947892	1.56587	1.43022	1.05041	0.995032	0.802336	0.80483	1.06195	82.35	4	11.1886	6.30322
P04897	Guanine nucleotide-binding protein G(i) subunit alpha-2 OS=Rattus norvegicus OX=10116 GN=Gnai2 PE=1 SV=3 - [GNAI2_RAT]	17	2	4	10		0.952805	0.948313	0.869528		1.12581	1.0515	1.12382		0.894844	1.14154	0.784302		0.828692	0.804079	1.2154		0.807622	0.94654	1.01047		1.3462	1.42575	1.0381		0.968054	1.3662	0.983787		0.703688	0.954596	0.877995		1.07808	0.996327	0.912417	98.25	2	40.4731	5.45264
M0RA08	Perilipin OS=Rattus norvegicus OX=10116 GN=Plin3 PE=1 SV=1 - [M0RA08_RAT]	1	3	6	20	3.32687	0.900627	1.063	1.01946	1.55068	1.02728	0.937743	1.01903	0.940619	0.839546	1.52971	1.06804	0.666634	0.808841	1.61723	0.862393	0.79477	0.879304	1.18887	1.14969	0.836534	0.934709	0.909435	1.08797	1.17347	0.870891	1.07142	1.23169	0.836775	1.11869	1.10889	1.03354	1.04842	1.00684	1.94086	1.1623	109.22	5	47.3139	5.71924
P47942	Dihydropyrimidinase-related protein 2 OS=Rattus norvegicus OX=10116 GN=Dpysl2 PE=1 SV=1 - [DPYL2_RAT]	1	6	8	34	0.963066	0.950678	1.08831	0.964043	0.920945	0.954775	1.37394	1.22066	1.04904	1.17715	0.893509	1.11427	1.08878	1.05294	1.02484	0.909844	1.10046	1.02115	0.899879	1.35407	0.972649	1.18021	0.975024	0.956106	0.986699	0.824559	1.0173	0.938133	1.0368	1.26514	0.966249	1.01951	1.18878	1.13008	1.02819	0.87027	176.74	8	62.2386	6.37939
Q66H98	Caveolae-associated protein 2 OS=Rattus norvegicus OX=10116 GN=Cavin2 PE=1 SV=3 - [CAVN2_RAT]	1	5	8	65	1.49938	1.04029	1.04869	1.10792	1.01059	0.701429	1.19806	0.726681	0.684148	0.712916	0.864669	1.1766	0.67726	0.881152	1.47295	0.897165	0.71522	0.861722	0.948791	0.83998	0.71666	1.04825	0.729153	0.914237	1.06293	1.21852	0.83702	1.05697	0.939864	1.86554	1.36587	0.917772	0.91069	0.69298	1.22535	1.15894	321.289	15	46.3583	5.2876
Q5RKI0	WD repeat-containing protein 1 OS=Rattus norvegicus OX=10116 GN=Wdr1 PE=1 SV=3 - [WDR1_RAT]	1	8	9	29	0.586234	0.892742	1.08619	0.555311	0.96604	1.25765	1.21319	1.20568	1.31904	1.27905	1.04496	0.78308	1.40878	1.1817	0.594732	0.882096	1.41247	1.17082	0.881174	1.20757	1.25435	0.860711	1.19137	0.496512	0.933502	0.520713	1.14008	0.835929	1.13005	0.627293	0.812595	1.17677	1.19375	1.30424	0.981952	0.898103	141.24	6	66.1399	6.62451
P14669	Annexin A3 OS=Rattus norvegicus OX=10116 GN=Anxa3 PE=1 SV=4 - [ANXA3_RAT]	2	5	5	16	0.767799	0.88948	0.898686	0.907048	0.800721	1.19376	1.32261	0.990337	0.996038	1.1713	0.911887	1.38659	1.06542	1.08337	1.03857	0.892357	1.01116	0.840622	0.799444	1.23007	0.934411	0.945723	0.984532	0.958027	1.20863	1.02575	0.726393	0.888805	1.05896	1.16631	0.902491	1.29082	1.0893	0.920236	1.13738	0.851855	69.8911	3	36.3406	6.354
P08082	Clathrin light chain B OS=Rattus norvegicus OX=10116 GN=Cltb PE=1 SV=1 - [CLCB_RAT]	1	4	6	24	1.58171	0.990281	0.918932	1.28916	1.19617	0.634081	1.05979	0.660383	0.604922	0.52557	0.960526	1.17972	0.516591	0.779644	1.84883	1.16155	0.506577	1.0446	0.962516	0.553796	0.702757	1.04095	0.686759	1.4426	0.934335	1.56222	0.905047	1.25775	0.739199	1.87087	1.79322	0.755756	0.711178	0.553697	0.992646	0.997924	105.566	6	25.1021	4.62744
F1LU71	Methylglutaconyl-CoA hydratase, mitochondrial OS=Rattus norvegicus OX=10116 GN=Auh PE=1 SV=2 - [AUHM_RAT]	1	1	6	12	0.94244				1.16843				1.02181				0.989416				0.91644				0.962253				1.03071				1.01127				0.828723				50.68	4	33.32	9.42236
O35077	Glycerol-3-phosphate dehydrogenase [NAD(+)], cytoplasmic OS=Rattus norvegicus OX=10116 GN=Gpd1 PE=1 SV=4 - [GPDA_RAT]	1	3	6	24	1.21138		1.21099	0.776686	0.88589		0.657836	0.936521	1.01005		1.1564	0.827741	0.939381		0.711406	0.929233	1.06103		0.977944	1.19221	0.859511		0.987524	0.886119	1.00665		1.27542	0.928934	0.916152		0.833133	1.0174	1.00544		0.477887	0.778448	75.0729	5	37.4282	6.59521
P05708	Hexokinase-1 OS=Rattus norvegicus OX=10116 GN=Hk1 PE=1 SV=4 - [HXK1_RAT]	2	1	16	68	0.690778			0.801478	1.05829			1.20141	1.35106			1.11763	1.31594			1.06048	1.51372			1.06308	1.27455			1.26835	0.980448			0.747563	1.22489			1.56962	1.2458			0.854749	363.065	10	102.342	6.7124
A0A0G2JSL8	Adenosine kinase OS=Rattus norvegicus OX=10116 GN=Adk PE=1 SV=1 - [A0A0G2JSL8_RAT]	3	2	5	15	1.01815			0.624542	1.29582			1.33199	1.2474			1.00305	1.33375			0.93674	1.47722			1.48949	1.53178			0.760097	1.25769			1.06211	1.70831			1.3764	1.44328			1.11841	87.03	2	40.1073	6.20166
B2RYG6	Ubiquitin thioesterase OTUB1 OS=Rattus norvegicus OX=10116 GN=Otub1 PE=1 SV=1 - [OTUB1_RAT]	1	3	4	16			0.955081	1.0313			1.02926	1.23417			1.06744	0.944102			0.888197	1.16182			1.03651	1.07753			1.10855	0.979472			1.10475	1.14247			0.946298	0.911638			0.915461	1.12213	75.51	4	31.2504	4.94482
Q62930	Complement component C9 OS=Rattus norvegicus OX=10116 GN=C9 PE=1 SV=1 - [CO9_RAT]	2	5	9	35	1.8301	0.917103	0.875344	1.19803	0.41408	0.715659	0.492952	1.1693	1.28178	0.504509	1.07366	0.424693	0.836807	1.10601	1.3339	0.687043	0.95958	0.917524	0.808249	1.31124	0.908199	1.08229	1.07851	0.514069	1.77414	1.4541	0.930945	0.846046	0.43248	1.05755	0.512842	1.51357	1.35537	1.35971	1.09865	0.832276	111.133	7	62.2406	5.69385
D4A4U3	Magnesium-dependent phosphatase 1 OS=Rattus norvegicus OX=10116 GN=Mdp1 PE=1 SV=1 - [D4A4U3_RAT]	1	1	2	10	2.09952	1.27045	0.829612	1.40892	1.30147	0.571002	1.02219	0.738026	0.759151	0.726139	0.851889	1.3472	0.615164	0.742211	1.30606	1.11736	0.73041	0.858709	1.14205	0.969684	0.801857	1.10858	0.734867	1.39655	1.23487	1.66042	0.75276	1.22104	0.979988	1.78035	1.47026	1.00243	0.916972	0.673351	0.885192	1.16673	92.87	2	18.5986	6.18896
Q6IRK8	Spectrin alpha chain, non-erythrocytic 1 OS=Rattus norvegicus OX=10116 GN=Sptan1 PE=1 SV=1 - [Q6IRK8_RAT]	5	14	34	105	0.825507	1.13352	1.10282	0.814637	0.849695	1.27873	1.25114	1.12868	1.05923	1.04506	0.99846	0.688597	1.03514	1.27092	1.03991	0.884277	1.15049	1.09822	0.940106	0.914191	1.03312	1.0081	1.13765	0.707909	1.00932	0.856294	1.20892	0.918658	1.0127	0.679265	1.26859	1.0142	1.20166	1.07656	1.06307	0.856764	499.278	22	282.206	5.31299
Q5U3Z3	Isochorismatase domain-containing protein 2 OS=Rattus norvegicus OX=10116 GN=Isoc2 PE=2 SV=1 - [ISOC2_RAT]	1	1	2	8	0.917872	0.863825	0.931813	1.05266	0.813939	1.54996	1.64203	1.12094	0.725927	0.956879	1.01347	1.06623	0.635711	0.638437	1.21954	0.923801	0.986686	1.14135	1.3659	1.51187	0.952235	0.967021	1.27613	1.23939	0.865354	1.3162	1.06847	0.870332	0.850778	1	1.17833	1.05041	0.757981	0.832436	2.03521	0.947689	62.9133	3	23.1423	7.82568
Q9EPH1	Alpha-1B-glycoprotein OS=Rattus norvegicus OX=10116 GN=A1bg PE=2 SV=2 - [A1BG_RAT]	1	6	8	31	2.67811	2.13509			2.37696	2.04197			1.02098	0.674509			1.52207	1.26941			1.24569	1.39968			1.81887	1.66077			2.73879	1.49205			2.24801	2.00098			1.41978	1.26352			183.485		56.4425	7.28369
F1LP30	Methylcrotonoyl-CoA carboxylase subunit alpha, mitochondrial OS=Rattus norvegicus OX=10116 GN=Mccc1 PE=1 SV=1 - [F1LP30_RAT]	2	4	10	34	0.923833	0.850687	1.02475	0.77171	1.27066	1.01616	1.08578	1.42097	1.08451	1.02484	1.00552	0.840553	1.15837	1.0779	0.815473	1.3361	1.06978	0.983457	1.14307	1.141	1.15286	1.09034	1.09658	0.90435	0.995939	0.578234	0.95862	0.915793	0.92681	0.855564	0.918512	1.02984	1.05842	1.13277	1.05525	1.03432	167.057	7	79.2454	7.13721
A0A0G2K9Y5	Similar to histidine-rich glycoprotein OS=Rattus norvegicus OX=10116 GN=Hrg PE=1 SV=1 - [A0A0G2K9Y5_RAT]	3	5	9	49	1.7251	1.12887	0.892337	1.27508	0.989181	0.690139	0.865637	0.752048	0.665024	0.904766	0.81874	1.56678	0.632074	0.846654	1.71336	0.746415	0.712941	0.799611	1.07347	0.836197	0.613367	1.00434	0.797423	0.834057	1.81297	1.04749	0.804646	1.45122	0.910122	1.66648	0.99323	0.813985	0.969277	0.948573	0.584247	1.5965	160.529	13	57.8902	7.81104
G3V6R5	Sulfite oxidase OS=Rattus norvegicus OX=10116 GN=Suox PE=1 SV=1 - [G3V6R5_RAT]	2	4	8	18	1.00928	0.912694	0.898238		0.954242	0.956049	0.858583		1.00703	0.824527	0.951723		0.925669	0.92977	0.91881		0.938626	0.926767	0.842678		1.02815	1.00406	0.958001		0.917059	0.923708	0.847689		1.08692	1.36411	1.04641		1.03405	0.815973	1.07816		73.22	2	60.7678	6.80029
P09527	Ras-related protein Rab-7a OS=Rattus norvegicus OX=10116 GN=Rab7a PE=1 SV=2 - [RAB7A_RAT]	2	1	2	5																																					29.18	1	23.4889	6.69775
Q6AYJ9	NAD(P)(+)--arginine ADP-ribosyltransferase OS=Rattus norvegicus OX=10116 GN=Art3 PE=2 SV=1 - [Q6AYJ9_RAT]	2	3	6	28	1.91348	1.14256	0.872081	1.32557	1.26433	0.999822	0.842129	0.984785	0.967245	0.944622	0.54816	0.700065	0.870109	0.898984	1.45422	0.876848	0.919955	1.26919	0.517665	1.05461	0.945342	1.45075	0.661645	0.604543	1.18125	1.79832	1.12566	0.999625	1.04902	0.944046	1.6042	0.881294	0.912404	0.827461	1.20433	1.10195	103.841	4	41.6861	5.89697
Q5U2Z3	Nucleosome assembly protein 1-like 4 OS=Rattus norvegicus OX=10116 GN=Nap1l4 PE=1 SV=1 - [NP1L4_RAT]	4	2	6	27	1.18168	1.12349	0.873576	1.31939	0.83227	0.68235	1.12801	0.749414	0.703409	0.793681	0.726329	0.993954	0.836764	0.827805	1.6927	0.695962	0.71773	0.931007	0.523065	0.755895	0.748329	1.14908	0.730129	0.846114	1.12988	1.28618	0.824111	1.09226	0.956557	1.27146	1.46671	0.779592	0.907065	0.658524	1.19234	1.19976	74.9267	4	43.8895	4.67822
P61314	60S ribosomal protein L15 OS=Rattus norvegicus OX=10116 GN=Rpl15 PE=1 SV=2 - [RL15_RAT]	2	2	4	8	0.626693		1.04057		1.0254		1.37914		1.04845		1.25689		1.37328		0.41517		1.31012		1.0428		1.22581		1.25322		0.940333		1.29956		1.04869		0.543265		1.21871		1.00124		32.0633		24.1311	11.6196
B1PRL5	Caveolae-associated protein 4 OS=Rattus norvegicus OX=10116 GN=Cavin4 PE=1 SV=1 - [CAVN4_RAT]	1	3	6	29	1.06798	1.16839	0.964223	0.923312	0.67264	0.937178	0.961156	0.889032	0.839751	0.988272	0.996109	1.34683	0.889083	1.06457	1.15791	0.893484	0.937914	0.929429	0.996561	1.13276	0.903876	1.0422	0.969355	1.02335	1.05836	1.12241	1.05934	0.824135	0.950628	1.90144	1.10317	0.94854	0.806192	0.975097	0.953377	0.902581	144.361	5	41.0684	8.63135
F8WFR6	Glycogenin-1 OS=Rattus norvegicus OX=10116 GN=Gyg1 PE=1 SV=1 - [F8WFR6_RAT]	3	1	5	24	1.13308				1.00398				1.10242				0.878555				1.04454				0.744301				1.00341				1.16274				1.0653				48.89	6	37.1224	5.38916
Q68FX0	Isocitrate dehydrogenase [NAD] subunit beta, mitochondrial OS=Rattus norvegicus OX=10116 GN=Idh3B PE=2 SV=1 - [IDH3B_RAT]	1	6	9	40	1.08309	0.983878	0.922849	0.764264	0.921939	1.14695	0.948438	1.1097	1.21585	1.24615	0.994691	0.918855	1.2331	1.16571	0.56652	0.825956	1.28326	0.991451	0.90008	1.24338	1.09491	1.01101	1.15212	0.854928	1.01254	0.802588	1.00241	0.830044	1.07585	0.71195	0.738521	0.981611	0.998981	1.11846	0.760332	1.04377	132.353	12	42.3268	8.74854
P57093	Phytanoyl-CoA dioxygenase, peroxisomal OS=Rattus norvegicus OX=10116 GN=Phyh PE=1 SV=2 - [PAHX_RAT]	1	3	6	15	0.919851	0.871578	1.24357		0.905792	1.11464	0.783981		1.0527	0.845535	0.866899		0.889392	1.12268	0.888661		1.00768	1.12361	0.86458		0.834343	0.988831	0.949032		0.903191	0.677017	0.95925		0.78138	1.06075	0.896076		0.989964	0.908957	0.83877		72.87	2	38.5635	8.48486
G3V945	Aldehyde dehydrogenase family 5, subfamily A1 OS=Rattus norvegicus OX=10116 GN=Aldh5a1 PE=1 SV=1 - [G3V945_RAT]	2	4	7	24	0.616583	0.882878	1.08994	0.710577	1.0246	1.1447	0.976265	1.28303	1.26039	1.23071	1.12223	0.85095	1.28697	1.19308	0.708437	1.00633	1.41082	1.06145	1.10218	1.1386	1.04009	0.991382	1.38812	0.880464	0.890276	0.737431	1.01494	0.801956	1.12545	0.716278	0.868243	1.10163	1.09223	1.14847	1.12819	0.942155	169.403	5	56.1099	8.08936
Q4V8F6	Pcbp2 protein OS=Rattus norvegicus OX=10116 GN=Pcbp2 PE=1 SV=1 - [Q4V8F6_RAT]	3	4	4	12	0.981115	0.970037	1.04178	0.803553	0.932698	1.15282	0.958727	1.39741	0.999012	1.09732	0.993717	0.964144	1.14262	1.23622	1.00587	0.891204	1.27473	1.06737	1.17256	1.04573	0.962663	1.01604	0.950111	0.612848	0.921003	0.780201	1.03882	0.789941	1.02295	1.11088	1.00852	1.04909	1.02425	1.15554	1.24127	0.921363	97.97	2	35.3242	8.00146
P14942	Glutathione S-transferase alpha-4 OS=Rattus norvegicus OX=10116 GN=Gsta4 PE=1 SV=2 - [GSTA4_RAT]	1	1	4	8																																					95.56		25.4934	7.32764
Q924S5	Lon protease homolog, mitochondrial OS=Rattus norvegicus OX=10116 GN=Lonp1 PE=2 SV=1 - [LONM_RAT]	1	5	12	32	0.832126	1.17315		0.66327	1.04919	1.27743		1.22285	1.32777	1.57991		0.730583	1.24606	1.29384		0.966744	1.30357	1.14197		1.52263	1.3183	0.936812		0.778871	1.15516	0.76789		0.801611	1.17754	0.63366		1.15996	1.12714	1.29546		0.99398	164.81	5	105.726	6.59521
P47875	Cysteine and glycine-rich protein 1 OS=Rattus norvegicus OX=10116 GN=Csrp1 PE=1 SV=2 - [CSRP1_RAT]	1	2	2	11	0.874027			1.01493	0.67654			0.979015	0.767428			1.08104	1.14106			1.20608	0.77895			1.27396	0.965397			1.23066	0.746932			1.21489	0.953371			1.09623	1.26163			1.14874	79.86	4	20.5998	8.57275
P06686	Sodium/potassium-transporting ATPase subunit alpha-2 OS=Rattus norvegicus OX=10116 GN=Atp1a2 PE=1 SV=1 - [AT1A2_RAT]	8	1	13	77	0.593261				0.967768				0.939509				1.42769				1.22753				1.42619				0.776722				1.18092				1.0119				352.901	15	112.145	5.5542
G3V8R0	Similar to sid2057p OS=Rattus norvegicus OX=10116 GN=RGD1311703 PE=1 SV=1 - [G3V8R0_RAT]	1	1	2	6	2.48121	1.13834	0.923742	1.36363	1.30339	0.448146	0.975484	0.355666	0.517189	0.488158	0.842309	1.30983	0.424414	0.777277	1.88611	0.871978	0.551077	0.949724	0.933977	0.645171	0.628349	0.850516	0.585666	1.4344	1.22921	1.51552	0.695037	1.31351	0.874671	2.04347	1.7661	0.696407	0.893215	0.595577	1.43914	0.889111	31.81	2	19.9491	4.84326
O35303	Dynamin-1-like protein OS=Rattus norvegicus OX=10116 GN=Dnm1l PE=1 SV=1 - [DNM1L_RAT]	1	2	8	25	1.31671	1.44438	1.42118	0.512482	0.995324	1.16353	1.00247	0.948547	0.966223	1.54335	1.30753	0.510602	1.07131	1.24292	1.04238		0.997315	0.950002	1.61168		1.01929	1.2175	1.15644	0.713735	0.818575	1.24219	1.3519	0.627375	1.07561	0.433523	1.21943	1.01902	0.934715	1.45984	1.54375	1.44903	132.769	3	83.8561	7.07861
A0A0H2UHT6	40S ribosomal protein S18 OS=Rattus norvegicus OX=10116 GN=Rps18 PE=1 SV=1 - [A0A0H2UHT6_RAT]	7	2	3	6	0.737276	0.824066	0.822387	0.666106	0.92185	1.03086	1.0946	1.31777	1.22431	1.27831	1.00159	0.657151	1.3472	1.34008	0.714428	1.11507	1.32748	1.58156	0.959967	1.6391	1.21565	0.968148	1.10068	0.926429	1.08854	0.904884	1.06011	0.687818	1.06675	1.00057	0.611799	1.34029	0.925924	1.39609	0.865884	0.981104	38.55	2	17.5768	10.9897
P27139	Carbonic anhydrase 2 OS=Rattus norvegicus OX=10116 GN=Ca2 PE=1 SV=2 - [CAH2_RAT]	1	3	4	14	0.887892	0.865214	0.709872	0.786366	0.983486	2.48773	0.767621	1.14972	0.810049	1.14262	1.34081	1.09387	1.09667	0.501059	0.84933	0.632424	0.935794	0.420088	2.2033	0.750737	2.19718	0.56948	0.894524	0.85666	1.86101	0.486508	1.11804	0.858595	1.70907	0.569881	0.731424	1.78332	1.06018	0.904038	1.18457	0.885938	71.58	5	29.0956	7.40088
P38718	Mitochondrial pyruvate carrier 2 OS=Rattus norvegicus OX=10116 GN=Mpc2 PE=2 SV=1 - [MPC2_RAT]	1	1	2	21	0.624699		0.773176	0.856952	1.55214		0.8624	1.49665	1.30599		0.816928	0.491493	0.862696		0.673492	1.97405	0.535663		0.577719	0.431298	2.29725		1.22576	1.30094	0.950017		2.57544	1.13276	1.02521		1.22997	0.635435	1.12764		0.429653	0.89469	61.87	5	14.2486	10.4771
D3ZAP9	Glycerol-3-phosphate dehydrogenase [NAD(+)] OS=Rattus norvegicus OX=10116 GN=Gpd1l PE=1 SV=1 - [D3ZAP9_RAT]	1	1	6	7	1.03651				0.92855				0.99638				1.04933				0.998113				0.907869				1.23897				0.944838				1.04581				36.5733		38.0419	7.00537
B2RZ78	Vacuolar protein sorting-associated protein 29 OS=Rattus norvegicus OX=10116 GN=Vps29 PE=1 SV=2 - [VPS29_RAT]	2	3	3	3	0.576522	1.24671		0.611019	0.718168	1.07286		1.11188	1.26344	1.2717		0.725787	1.07339	1.10703		0.989665	1.08314	1.12748		0.85267	1.19147	1.05747		0.683371	0.870915	0.926248		0.806087	0.917681	0.660395		1.03395	1.07625	1.27554		0.729875	40.65	1	20.4556	6.78564
Q6AYE2	Endophilin-B1 OS=Rattus norvegicus OX=10116 GN=Sh3glb1 PE=2 SV=1 - [SHLB1_RAT]	2	1	6	14			0.951125	1.1365			1.55198	0.85709			0.946016	1.04653			2.46804	0.849977			0.698192	1.10118			1.01628	0.95924			1.06542	1.00038			1.43658	0.973868			1.26616	1.38138	55.7433	4	40.7618	6.03662
P11608	ATP synthase protein 8 OS=Rattus norvegicus OX=10116 GN=Mt-atp8 PE=1 SV=2 - [ATP8_RAT]	1	1	2	42	0.624506				1.04406				1.28177				1.1632				1.16832				1.12351				1.17372				1.29064				0.955677				111.149	12	7.62494	9.31982
P63245	Receptor of activated protein C kinase 1 OS=Rattus norvegicus OX=10116 GN=Rack1 PE=1 SV=3 - [RACK1_RAT]	2	4	5	17	0.776004	0.888923	1.12136		1.0612	1.32536	1.22737		1.06061	1.39343	0.981817		1.26756	1.25078	0.872144		1.27239	1.13156	1.07859		1.40235	0.903114	1.35932		1.03664	0.538196	1.37813		1.08325	0.641925	0.939508		1.21757	1.34995	0.687524		108.573	2	35.0546	7.69385
Q5M7T5	Serine (Or cysteine) peptidase inhibitor, clade C (Antithrombin), member 1 OS=Rattus norvegicus OX=10116 GN=Serpinc1 PE=1 SV=1 - [Q5M7T5_RAT]	1	3	7	20	2.19206				0.788906				0.940816				1.01909				0.975969				0.813155				1.72737				0.964194				1.2438				51.5067	3	52.2008	6.56592
Q9WU49	Calcium-regulated heat stable protein 1 OS=Rattus norvegicus OX=10116 GN=Carhsp1 PE=1 SV=1 - [CHSP1_RAT]	1	2	2	13	1.6077	1.17275	1.04726	1.16909	0.936774	0.656035	0.883874	0.578369	0.700497	0.580629	1.11837	1.18712	0.465362	0.807128	1.81647	1.01692	0.521717	1.00398	1.10889	0.758281	0.58081	1	0.698333	1.31426	0.922599	1.39527	0.846609	1.30154	0.681905	2.17774	1.89449	0.845935	0.707914	0.625536	1.20876	1.00438	89.23	3	15.896	8.20654
A0A0G2K4I4	Endoplasmin OS=Rattus norvegicus OX=10116 GN=Hsp90b1 PE=1 SV=1 - [A0A0G2K4I4_RAT]	3	5	8	42	0.920018	0.769506	1.04494	0.613375	1.02652	1.10423	1.52445	1.26098	1.07454	1.16916	1.1828	0.761315	1.26061	1.05211	0.964867	0.791954	1.25066	1.06128	0.910285	1.19606	1.09509	0.960711	1.28237	0.483787	0.910303	0.597137	1.27017	0.698871	1.05041	0.694228	0.89328	0.985771	1.15528	1.32299	1.19601	0.872422	177.371	11	74.2907	5.10986
A0A0H2UI18	40S ribosomal protein S10 OS=Rattus norvegicus OX=10116 GN=Rps10 PE=4 SV=1 - [A0A0H2UI18_RAT]	6	1	2	21	0.745597	1.10497	1.0637	0.856508	0.763456	1.05464	0.962318	1.39856	1.14962	1.45044	0.93415	0.64682	1.49634	1.09977	0.630729	0.751854	1.23303	0.946165	0.880981	1.48407	1.33124	0.936415	1.24211	0.957809	1.05939	0.814724	1.08239	0.828633	1.01607	0.575991	0.786507	1.00024	1.09109	1.3607	1.04079	0.95522	145.541	5	18.1705	10.1255
O35567	Bifunctional purine biosynthesis protein PURH OS=Rattus norvegicus OX=10116 GN=Atic PE=1 SV=2 - [PUR9_RAT]	1	4	7	42	0.688475		1.17757	0.868773	1.04357		0.999606	1.1245	1.03074		0.909619	0.728233	1.15596		0.74386	3.21731	1.04467		7.67084	1.28094	1.03008		0.643445	1.071	0.912485		0.76092	0.850578	1.02158		0.494493	1.24904	1.05467		1.13148	1.11372	122.42	8	64.1682	7.13721
D3ZA85	Histone cell cycle regulation defective interacting protein 5 (Predicted), isoform CRA_a OS=Rattus norvegicus OX=10116 GN=Nfu1 PE=1 SV=1 - [D3ZA85_RAT]	1	1	3	9			1.01093	1.43466			0.992701	0.733688			0.864879	1.10848			2.22582	1.09459			0.895248	0.871306			0.670614	1.22958			0.84191	1.21775			1.80932	0.71701			1.32598	1.23876	53.05	2	28.3493	4.95752
A0A0G2KBA1	Uncharacterized protein OS=Rattus norvegicus OX=10116 PE=4 SV=1 - [A0A0G2KBA1_RAT]	3	2	5	20		0.727447	0.92654	0.766185		1.02977	0.942913	1.1412		1.1919	1.01747	0.659025		1.11298	0.654555	1.02497		1.03475	1.34316	1.01146		0.72315	0.932472	0.925801		0.689113	0.950098	0.787456		0.435256	0.740581	1.01196		1.34304	0.935231	0.721384	50.84	4	31.907	10.7407
G3V7L6	26S proteasome regulatory subunit 7 OS=Rattus norvegicus OX=10116 GN=Psmc2 PE=1 SV=1 - [G3V7L6_RAT]	2	2	5	16		1.11916	1.11446	0.906147		1.17472	1.08542	0.854073		1.10798	0.816379	0.899056		1.06556	1.02708	1.20127		1.00186	0.793511	0.993098		0.983206	0.766839	0.802163		0.94162	0.817157	0.828634		0.751069	1.01958	0.785601		1.02248	0.979414	0.950291	72.3	4	48.6031	5.94775
Q63041	Alpha-1-macroglobulin OS=Rattus norvegicus OX=10116 GN=A1m PE=1 SV=1 - [A1M_RAT]	1	9	19	72	0.771318	0.790421	0.769495	0.710943	0.879496	2.56166	0.857225	1.03462	0.878631	0.9541	1.379	1	1.32097	0.932672	0.443819	0.609838	1.3894	0.764477	1.63519	1.08061	1.91837	0.809139	1.03221	0.794705	2.1412	0.783003	1.03601	0.930741	1.0206	0.571348	0.524497	1.3592	1.33576	1.09737	1.11351	0.648806	391.353	12	167.019	6.90283
G3V9Q3	Heterogeneous nuclear ribonucleoprotein H OS=Rattus norvegicus OX=10116 GN=Hnrnph1 PE=1 SV=2 - [G3V9Q3_RAT]	5	3	4	16	1.6224	1.22101	0.889649	1.15521	1.03379	0.908195	1.06634	0.834433	0.852505	0.86754	0.872819	1.16427	0.899186	0.815476	1.13337	0.928197	0.765442	0.946118	0.919558	0.806036	0.969979	1.1536	0.776715	1.11294	1.15681	1.14917	0.804493	1.12185	1.20069	1.39548	1.16534	0.852543	1.11221	0.870155	0.977189	0.978284	106.993	5	40.5912	6.66846
Q6URK4	Heterogeneous nuclear ribonucleoprotein A3 OS=Rattus norvegicus OX=10116 GN=Hnrnpa3 PE=1 SV=1 - [ROA3_RAT]	2	2	3	13	1.20573	1.20615	1.0707	1.06519	0.773886	0.883918	1.2395	0.582965	0.453106	0.871633	0.844277	1.20655	0.76072	0.915626	1.72448	0.736753	0.695185	0.702378	1.03328	0.597706	0.725633	1.1122	0.966991	0.659187	0.863419	1.18701	1.08976	0.927799	0.478537	1.62871	1.19204	0.64096	1.00942	0.750883	1.32936	0.794606	152.7	4	39.6276	9.01221
Q920F5	Malonyl-CoA decarboxylase, mitochondrial OS=Rattus norvegicus OX=10116 GN=Mlycd PE=1 SV=1 - [DCMC_RAT]	1	3	5	10	0.646517	1.17412	1.01351	0.771348	1.23804	1.22502	0.789656	1.1861	1.56669	1.18056	0.972976	0.821858	1.1408	1.02433	0.814132	1.06586	1.05406	1.21083	1.16124	1.12324	1.13728	1.13508	0.955423	1.16918	1.07788	1.006	1.01262	1.11174	1.02335	0.827801	0.809366	1.2531	1.02351	1.12185	1.01803	1.03663	70.4174	2	54.7273	8.71924
P12368	cAMP-dependent protein kinase type II-alpha regulatory subunit OS=Rattus norvegicus OX=10116 GN=Prkar2a PE=1 SV=4 - [KAP2_RAT]	1	1	4	9	1.48545	1.19269			1.77525	1.0596			1.2009	0.788308			0.834309	0.887064			0.614676	0.642316			1.6408	1.47938			1.18152	1.42101			1.05475	0.96238			1.17886	0.697662			63.33		45.4517	4.93213
P20759	Ig gamma-1 chain C region OS=Rattus norvegicus OX=10116 PE=1 SV=1 - [IGHG1_RAT]	5	1	4	26	0.93572	0.791407	0.541879		1.40589	0.608552	0.560675		1.37402	1.04861	0.783354		1.08164	1.41393	1.05382		1.7093	1.41259	1.27978		1.49719	1.37234	0.817891		1.05675	0.897644	0.724206		1.36133	1.53042	0.536067		1.8169	1.16128	0.686239		210.638	3	35.9227	6.88818
D4A6W6	Uncharacterized protein OS=Rattus norvegicus OX=10116 PE=3 SV=1 - [D4A6W6_RAT]	2	2	4	5	0.802411				0.939988				1.04805				1.1505				1.23228				1.14192				0.941234				0.967363				1.12848				48.0533		28.1393	10.7847
A0A0G2JSU3	Protein SET OS=Rattus norvegicus OX=10116 GN=Set PE=1 SV=1 - [A0A0G2JSU3_RAT]	3	1	2	2																																					31.48		33.3616	4.31006
A0A0G2JSM3	PDZ and LIM domain 3, isoform CRA_a OS=Rattus norvegicus OX=10116 GN=Pdlim3 PE=1 SV=1 - [A0A0G2JSM3_RAT]	4	3	4	18	1.52774	1.0798	0.912081	1.10897	1.12473	0.91992	1.38158	0.844595	0.684067	0.777537	0.753354	1.15776	0.734187	1.02442	1.35807	0.941374	0.807389	1.1835	0.998554	0.703111	0.805618	1.23544	0.736442	0.929406	0.826367	1.12046	0.76996	0.816285	1.00422	1.82569	1.53072	0.824774	1.12327	0.971381	0.877732	0.842691	97.71	4	34.3963	7.91357
F1M7X3	Cadherin 13 OS=Rattus norvegicus OX=10116 GN=Cdh13 PE=1 SV=3 - [F1M7X3_RAT]	2	4	7	71	2.22121	1.14315	0.846245	1.35206	0.977473	0.892923	0.973385	0.848174	0.721	0.790152	0.777729	0.790319	0.582933	1.09179	1.91	1.1433	0.784642	1.10442	0.740479	0.891129	0.791763	1.02526	0.753167	0.985428	1.02066	1.17082	0.814219	0.993129	0.872398	1.52365	1.38397	0.874126	0.928664	0.831838	1.03455	1.05209	427.647	19	66.4329	4.95752
P26453	Basigin OS=Rattus norvegicus OX=10116 GN=Bsg PE=1 SV=2 - [BASI_RAT]	1	5	6	61	1.99665	1.30299	0.778066	1.37771	1.18285	0.790215	0.836795	0.721394	0.779248	0.666467	0.641833	0.794645	0.599428	0.841504	1.75871	0.852154	0.771645	0.934788	0.616466	0.864925	0.80577	1.1954	0.772459	0.776518	1.29598	1.75966	0.969949	1.24133	0.974127	1.44868	1.42791	0.766295	0.910169	0.703463	1.10772	1.19112	280.574	16	42.4092	5.40186
Q8R3Z7	EH-domain-containing 4 OS=Rattus norvegicus OX=10116 GN=Ehd4 PE=1 SV=1 - [Q8R3Z7_RAT]	1	2	7	19	0.727521	1.01449	0.941229		0.82665	1.15902	0.99792		1.24283	1.33474	0.949027		1.23349	1.30647	0.629535		1.18918	0.990611	0.977428		1.24958	1.04452	1.1443		1.16155	0.883987	1.1847		1.09038	0.524339	0.816917		1.13177	1.29427	1.26424		111.373		61.4285	6.75635
F1M964	Mitochondrial-processing peptidase subunit alpha OS=Rattus norvegicus OX=10116 GN=Pmpca PE=1 SV=2 - [F1M964_RAT]	3	4	6	30	1.11726	1.13694	1.05625	1.17313	1.00014	1.32856	1.03854	1.29012	1.2451	1.30434	1.14636	0.659024	1.13092	1.27669	0.760046	0.866939	1.14845	1.13999	0.964396	1.19263	1.40726	1.17415	1.48826	1.00649	0.912386	0.811258	1.35678	0.94189	1.37934	0.562553	1.0811	0.928695	0.902085	1.20014	1.20431	0.928579	249.87	6	58.3437	7.94287
A0A0G2K8K0	Splicing factor proline and glutamine rich OS=Rattus norvegicus OX=10116 GN=Sfpq PE=1 SV=1 - [A0A0G2K8K0_RAT]	1	3	8	21	0.675627	0.813968	1.09754	0.976559	0.948674	0.963898	1.37202	1.0037	0.698061	0.97921	1.07424	1.58776	0.860892	1.01705	0.939028	1.12509	0.864928	1.03992	1.21962	1.16869	0.721766	0.928264	0.801524	1.10496	0.970932	0.965022	0.794376	0.915428	0.921275	2.40289	0.94542	1.16027	0.773269	0.964023	0.978346	1.06124	93.125	6	75.039	9.39307
F1LRV6	GMP reductase OS=Rattus norvegicus OX=10116 GN=Gmpr PE=3 SV=1 - [F1LRV6_RAT]	3	3	5	18	0.43823	0.822067	1.11879	0.601425	0.895337	1.155	0.960751	1.19714	1.16088	1.15453	1.10147	1.18682	1.45913	1.30952	0.521613	0.996563	1.20804	1.21306	0.775054	1.44634	1.20809	0.824498	1.42315	0.841885	0.74575	0.541442	1.0962	0.532376	1.08998	0.675537	0.826424	1.12275	1.24734	1.17836	0.905606	0.947988	135.877	3	37.4338	6.97607
A0A096MJS3	Muscular LMNA-interacting protein (Fragment) OS=Rattus norvegicus OX=10116 GN=Mlip PE=1 SV=1 - [A0A096MJS3_RAT]	2	5	8	38	1.67262	1.10158	1.02468	1.13321	0.966567	0.80169	0.788217	0.673708	0.684736	0.863527	1.01699	1.29311	0.554852	0.822685	1.97935	0.892472	0.581146	1.06917	0.942325	0.743246	0.589122	0.978681	0.671483	1.00826	0.955195	0.930481	0.762867	1.12023	0.689738	1.55205	1.73888	0.885744	0.833815	0.669266	1.30541	0.923094	174.598	8	82.2173	8.88037
P85971	6-phosphogluconolactonase OS=Rattus norvegicus OX=10116 GN=Pgls PE=1 SV=1 - [6PGL_RAT]	2	2	3	15	1.77009	0.930876	1.07056	1.93971	1.30416	0.872608	0.79506	1.03225	0.741634	0.394429	0.985086	1.3334	0.694011	0.5352	1.63914	1.09494	0.748833	0.766293	1.09544	1.48254	0.804918	0.758441	0.910543	1.164	0.972011	1.09209	1.11658	1.28283	0.891686	1.13221	1.2359	1.07706	0.915552	0.527842	1.18988	1.13159	67.94	4	27.2173	5.84619
Q68FR6	Elongation factor 1-gamma OS=Rattus norvegicus OX=10116 GN=Eef1g PE=2 SV=3 - [EF1G_RAT]	1	3	6	21	1.09281	1.08699	0.954491	0.489232	1.33369	1.33407	1.17266	1.42418	1.47599	1.51923	0.963675	0.551142	1.43088	1.14348	0.41184	0.821066	1.44029	1.10123	0.860454	1.44623	1.38269	0.86525	1.25154	0.491154	0.935558	0.552295	1.02384	0.680959	1.18878	0.380472	0.682082	1.04278	1.22501	1.30911	0.856929	0.848099	96.0074	5	50.0292	6.7417
Q9JJ54	Heterogeneous nuclear ribonucleoprotein D0 OS=Rattus norvegicus OX=10116 GN=Hnrnpd PE=1 SV=2 - [HNRPD_RAT]	2	2	4	27	1.27684	0.919477	0.974667	1.00956	0.916986	0.771808	1.34833	0.899357	0.723093	0.729569	0.920227	1.56487	0.616444	0.768884	1.19581	0.887399	0.609884	0.985725	1.08012	0.890048	0.680965	1.01227	0.888704	0.867683	0.820561	1.04132	0.764054	1.23997	0.806197	2.07187	1.48501	1.07535	0.944965	0.809364	0.735335	0.866828	122.301	7	38.1942	7.81104
G3V9R9	Afamin OS=Rattus norvegicus OX=10116 GN=Afm PE=1 SV=1 - [G3V9R9_RAT]	3	4	9	20	1.64094	0.891175	0.930588	1.46282	0.921196	0.649421	1.41962	0.958515	0.565782	0.780701	0.956019	1.68176	0.586606	0.720433	1.87123	0.799863	0.605712	0.782945	0.992016	0.644807	0.650129	0.680465	0.977885	1.0575	1.03535	0.963325	0.68342	1.2208	0.953678	0.851329	1.88877	0.824467	0.767614	0.583799	1.04145	0.973435	101.67	8	69.196	6.21436
O35814	Stress-induced-phosphoprotein 1 OS=Rattus norvegicus OX=10116 GN=Stip1 PE=1 SV=1 - [STIP1_RAT]	1	1	8	21																																					63.69	8	62.5304	6.80029
Q01177	Plasminogen OS=Rattus norvegicus OX=10116 GN=Plg PE=2 SV=2 - [PLMN_RAT]	1	4	10	19		1.02179	1.16359	1.11346		1.18357	1.15387	0.907406		0.797869	0.999975	2.09146		0.839372	1.59352	1.02617		1.20943	1.39929	0.64157		0.920318	0.839937	1.44502		0.908253	0.705634	1.02074		1.476	1.11142	0.939275		0.746171	1.39333	0.749601	139.31	5	90.4769	7.07861
M0RAQ6	Hexokinase-1 OS=Rattus norvegicus OX=10116 GN=Hk1 PE=1 SV=2 - [M0RAQ6_RAT]	2	1	13	46				0.726334				1.13855				0.646058				1.00442				1.1687				0.797248				0.808446				1.08038				0.856716	217.211	6	99.4931	7.13721
A0A096MK73	Stathmin (Fragment) OS=Rattus norvegicus OX=10116 GN=Stmn1 PE=1 SV=1 - [A0A096MK73_RAT]	3	2	2	2	1.62731		1.03634		1.17838		1.09231		0.436986		1.2503		0.315389		1.69399		0.436613		1.2643		0.448665		0.749719		0.907751		0.891414		0.668922		2.12791		0.669544		1.50289		44.62		14.6277	7.48877
F1LQ55	Non-specific lipid-transfer protein OS=Rattus norvegicus OX=10116 GN=Scp2 PE=1 SV=3 - [F1LQ55_RAT]	4	5	8	30	1.45076	0.902554	1.27558	1.18235	0.698057	0.721262	0.692477	0.875109	0.682915	0.383385	0.911561	0.842971	0.471342	0.622575	1.73529	0.938505	0.55775	0.933166	0.934947	0.791654	0.602264	1.14185	0.896485	1.33295	0.915618	1.31907	1.25053	1.58393	0.459523	2.29225	1.23996	1.03178	0.748953	0.626687	1.49109	0.948309	127.337	8	58.7494	7.03467
F1MA54	[Pyruvate dehydrogenase (acetyl-transferring)] kinase isozyme 1, mitochondrial OS=Rattus norvegicus OX=10116 GN=Pdk1 PE=1 SV=2 - [F1MA54_RAT]	2	3	5	21	0.751554	0.787293	0.961454	0.580965	1.23797	0.979502	0.926206	1.51412	1.45425	1.2514	0.984597	0.619833	1.31997	0.916681	0.73668	0.963641	1.15142	0.800972	1.00573	1.25083	1.1728	0.95145	1.25536	0.730152	1.00685	0.855434	1.09962	0.685369	1.08315	0.823369	0.875438	1.07301	0.948186	0.854424	0.967032	0.829137	114.003	3	49.0678	8.00146
D4A7N1	MICOS complex subunit Mic25 OS=Rattus norvegicus OX=10116 GN=Chchd6 PE=1 SV=1 - [MIC25_RAT]	1	2	3	10	1.57032		0.883549	1.04885	1.00808		0.953036	1.00917	0.853338		1.02229	1.29216	0.753919		1.44534	1.26141	0.845427		1.09435	0.824709	0.805214		0.863188	1.35806	0.925912		0.68622	1.15897	0.914658		1.3975	1.06513	0.899452		0.753662	0.949898	67.9087	2	29.1928	7.94287
Q3ZBD7	SWISS-PROT:Q3ZBD7 (Bos taurus) Glucose-6-phosphate isomerase	1	1	6	16																																					136.65	4	62.831	7.7085
D3ZVS2	L-2-hydroxyglutarate dehydrogenase OS=Rattus norvegicus OX=10116 GN=L2hgdh PE=1 SV=1 - [D3ZVS2_RAT]	1	3	4	9	0.797689	0.915942	0.922423	0.680685	1.16763	0.896592	0.842465	1.38832	1.56622	1.37963	1.21842	0.59818	1.23282	1.09882	0.706112	1.14783	1.28218	1.05959	1.322	1.92378	1.10949	0.873004	1.30121	0.814314	1.33631	0.601689	0.951402	0.850468	1.13593	0.528697	0.58685	1.40585	0.959811	1.5158	1.13054	1.06406	133.683	1	50.7005	8.48486
M0RCH6	Uncharacterized protein OS=Rattus norvegicus OX=10116 PE=1 SV=2 - [M0RCH6_RAT]	1	1	3	12		1.16623				0.662448				0.602191				0.747683				0.965144				0.829081				1.45548				1.65388				0.672969			61.36	3	24.7966	4.99561
Q499N6	UBX domain-containing protein 1 OS=Rattus norvegicus OX=10116 GN=Ubxn1 PE=3 SV=2 - [UBXN1_RAT]	1	1	3	5				1.29703				0.858319				1.15032				1.08034				0.959765				1.25066				1.15248				0.802237				0.948158	41.71	2	33.5611	5.26221
O35413	Sorbin and SH3 domain-containing protein 2 OS=Rattus norvegicus OX=10116 GN=Sorbs2 PE=1 SV=2 - [SRBS2_RAT]	3	8	14	85	1.62376	1.11816	1.05258	1.00603	1.07606	0.848094	1.05534	0.823497	0.78214	0.669339	0.886583	1.13698	0.652982	0.861872	1.53474	1.00036	0.715119	1.00447	1.19743	0.875452	0.716507	0.920602	0.788369	1.04935	0.98677	1.16102	0.916954	1.09049	0.858897	1.7253	1.53283	0.942907	0.953099	0.721605	1.22499	1.0129	358.43	25	133.974	8.45557
P62907	60S ribosomal protein L10a OS=Rattus norvegicus OX=10116 GN=Rpl10a PE=1 SV=2 - [RL10A_RAT]	2	2	3	12	0.699555	0.800348	0.896019	0.923004	1.17941	0.989871	1.01164	0.950248	0.948015	1.04436	0.957096	0.860953	1.04116	0.993102	0.642197	1.22083	1.10259	1.12741	1.18396	1.10238	0.99025	0.756288	0.775326	1.15045	0.885507	0.987662	0.887092	0.986222	0.910025	0.788126	0.720321	1.04148	0.890644	1.0379	0.839364	0.823094	60.6816	4	24.8155	9.93506
Q5RJK5	Chromobox 3 OS=Rattus norvegicus OX=10116 GN=Cbx3 PE=1 SV=1 - [Q5RJK5_RAT]	4	2	2	10		0.983641		1.16793		0.827146		0.700543		0.802792		1.21787		0.841611		0.963777		1.03504		0.817341		1.06236		1.10355		1.42011		1.19088		1.57835		0.810284		0.786815		1.06297	56.2933	3	20.7984	5.32568
Q5RJZ6	Short coiled-coil protein OS=Rattus norvegicus OX=10116 GN=Scoc PE=2 SV=1 - [SCOC_RAT]	1	1	1	7		0.919764	0.933401	1.29059		0.686806	0.961179	0.755536		0.686053	1.0309	1.06006		0.73251	1.23852	1.01384		0.819202	1.08397	0.865141		0.96014	0.724957	1.32487		1.51417	0.942419	1.28564		1.60004	1.29449	0.770555		0.6276	1.16222	0.937666	93.84	2	13.6807	4.65283
Q5XII0	Mammalian ependymin-related protein 1 OS=Rattus norvegicus OX=10116 GN=Epdr1 PE=2 SV=1 - [EPDR1_RAT]	1	2	3	9	1.35345	0.971365	0.861959	1.02747	1.0749	0.792064	0.966898	1.05475	0.690838	0.912012	0.747213	1.07796	0.802719	0.932913	1.09912	1.06164	0.796713	0.929235	0.828183	0.997098	0.559061	0.884851	0.862759	1.04769	0.88493	1.23088	0.831937	1.07973	0.949925	1.58812	1.06339	0.972263	0.766382	0.75638	1.02288	1.04022	70.0067	2	25.6229	7.57666
Q6AY18	SAR1 gene homolog A (S. cerevisiae), isoform CRA_b OS=Rattus norvegicus OX=10116 GN=Sar1a PE=1 SV=1 - [Q6AY18_RAT]	1	1	2	8	0.824529				0.783453				0.602064				0.646069				0.777335				0.813738				0.868799				0.865414				0.789388				54.91		22.3845	6.68311
A0A0G2K7M2	RAD23 homolog A, nucleotide excision repair protein OS=Rattus norvegicus OX=10116 GN=Rad23a PE=1 SV=1 - [A0A0G2K7M2_RAT]	3	2	4	7				0.892864				0.791302				1.18836				0.902853				0.842663				0.911786				1.12721				0.899259				0.996462	49.93	4	39.5136	4.57666
P23457	3-alpha-hydroxysteroid dehydrogenase OS=Rattus norvegicus OX=10116 GN=Akr1c9 PE=1 SV=1 - [DIDH_RAT]	1	2	3	3	1.02187			1.3228	1.11082			1.10077	0.907255			1.02678	0.969826			1.61562	1.16933			1.44566	0.979977			1.49083	0.880305			0.810322	0.859352			0.948641	0.868932			1.06571	27.86	1	37.0039	7.09326
Q6RUV5	Ras-related C3 botulinum toxin substrate 1 OS=Rattus norvegicus OX=10116 GN=Rac1 PE=1 SV=1 - [RAC1_RAT]	10	1	3	9	1.14781	0.910705			1.03068	1.23657			1.10375	1.20677			1.18268	1.11111			1.25409	1.03621			1.17927	0.85482			0.978794	0.58998			1.11678	0.519708			1.25683	1.26437			57.2733		21.4362	8.49951
B0BNE5	S-formylglutathione hydrolase OS=Rattus norvegicus OX=10116 GN=Esd PE=2 SV=1 - [ESTD_RAT]	1	1	2	13	0.918079				1.23127				1.16698				1.28682				1.24856				1.10181				0.90849				1.01206				1.23042				59.42	2	31.3434	6.90283
Q63159	Ubiquinone biosynthesis O-methyltransferase, mitochondrial OS=Rattus norvegicus OX=10116 GN=Coq3 PE=2 SV=2 - [COQ3_RAT]	1	3	4	22	1.2124	1.10888	1.20893	0.952775	0.98422	0.90492	0.940542	1.05237	1.06896	0.822462	1.01434	0.867978	1.13322	0.869889	1.02488	0.765625	0.758484	0.868696	0.889688	0.862874	0.891383	1.11186	1.05267	0.65731	0.80452	0.916364	1.21367	0.995369	0.993212	0.90074	1.36674	1.00619	0.762484	0.894812	0.82223	1.15172	115.68	5	38.6836	7.97217
Q9WVJ4	Synaptojanin-2-binding protein OS=Rattus norvegicus OX=10116 GN=Synj2bp PE=1 SV=2 - [SYJ2B_RAT]	1	2	2	10	1.11241	1.05071	1.0275	0.87074	1.28959	0.971511	0.91205	0.870334	1.14277	1.02106	1.01366	0.801186	1.12519	1.05469	1.1093	0.972189	0.960005	1.0402	0.98396	0.988053	1.17863	0.880111	0.852932	0.753376	1.20329	0.821638	0.891585	0.907202	1.16408	0.808959	0.941648	0.854186	1.1177	0.87499	1.16236	1.01038	67.63	2	15.8153	6.80029
B2GUX5	5'-nucleotidase OS=Rattus norvegicus OX=10116 GN=Nt5c3a PE=1 SV=1 - [B2GUX5_RAT]	1	1	3	3			1.50337				1.18577				0.866247				1.04064				0.936659				1.04784				1.40357				0.998477				1.2899		43.23		33.7883	5.46533
Q5U300	Ubiquitin-like modifier-activating enzyme 1 OS=Rattus norvegicus OX=10116 GN=Uba1 PE=1 SV=1 - [UBA1_RAT]	2	9	12	42	0.793936	0.858611	1.06713	0.716022	1.00333	1.1706	1.03755	1.25836	1.24129	1.24237	1.00485	0.883686	1.45537	1.06246	0.626515	1.06266	1.36204	1.03745	0.965499	1.19291	1.36759	1.00267	1.22086	0.961952	0.932503	0.576091	1.08083	0.884949	1.15773	0.504029	0.817131	1.02093	1.18352	1.22419	1.07351	0.926424	218.04	7	117.713	5.56689
M0R3V4	Myeloid-derived growth factor OS=Rattus norvegicus OX=10116 GN=Mydgf PE=1 SV=2 - [M0R3V4_RAT]	1	1	2	9		1.04915	0.99429			0.938299	1.28866			0.754418	0.863526			0.746626	1.15978			0.781147	0.70889			1.08179	0.925312			0.835765	0.871946			1.71248	1.03987			0.701331	0.790185		45.2533	1	17.9409	6.16357
P00787	Cathepsin B OS=Rattus norvegicus OX=10116 GN=Ctsb PE=1 SV=2 - [CATB_RAT]	2	2	3	11	2.08898	0.885245	1.05987	1.281	0.856341	0.642074	1.27861	0.712355	0.737764	0.611684	0.79233	1.19314	0.456349	0.826128	1.8192	0.970133	0.601977	0.956647	1.26664	0.961739	0.547967	0.905567	0.63205	1.17518	1.06812	1.19669	1.02833	1.42321	0.814105	1.56588	1.79304	1.02359	0.677706	0.664587	0.886716	1.29105	101.72	4	37.4456	5.60498
B2RYJ7	ARP1 actin-related protein 1 homolog B OS=Rattus norvegicus OX=10116 GN=Actr1b PE=1 SV=1 - [B2RYJ7_RAT]	2	3	4	18	0.743804	0.913725		0.734967	0.907988	1.12775		1.43074	1.05085	1.32938		0.660592	1.3192	1.0757		0.857997	1.3484	1.04321		1.48042	1.39466	1.07569		0.693982	1.09182	0.913902		0.9529	1.22815	0.840884		1.25192	1.20073	1.33971		1.07137	105.95	5	42.2547	6.40479
Q9ES40	PRA1 family protein 3 OS=Rattus norvegicus OX=10116 GN=Arl6ip5 PE=1 SV=1 - [PRAF3_RAT]	2	1	1	3			0.869807				0.55995				0.735135				1.04646				0.493909				0.769073				1.3141				1.21102				0.91336		35.85	2	21.5343	9.61279
F1LM33	Leucine-rich PPR motif-containing protein, mitochondrial OS=Rattus norvegicus OX=10116 GN=Lrpprc PE=1 SV=2 - [F1LM33_RAT]	2	10	15	73	0.623656	0.92088	1.10457	0.821115	0.981202	1.29729	1.06732	1.20946	1.23563	1.34036	1.12468	0.607699	1.10739	1.24699	0.665075	0.939932	1.20065	1.2078	0.996384	1.16091	1.01931	0.869705	1.1744	0.934057	0.93137	0.837391	1.14208	0.991128	1.10068	0.611917	0.981114	1.0112	1.01575	1.3119	0.940207	0.892665	209.644	16	156.581	6.60986
Q5U1Z8	Protein preY, mitochondrial OS=Rattus norvegicus OX=10116 GN=Pyurf PE=3 SV=1 - [PREY_RAT]	1	1	1	18		1.05053	1.5273	1.53358		0.38201	1.04426	0.538906		0.549256	0.950335	1.07898		0.744963	2.37894	1.1037		0.701431	1.42937	0.712938		1.04194	0.71544	1.78246		2.05493	1.01007	1.19209		1.14225	1.97404	0.716208		0.51559	1.99999	1.34045	73.57	4	12.6446	9.29053
B0BN18	Prefoldin subunit 2 OS=Rattus norvegicus OX=10116 GN=Pfdn2 PE=2 SV=1 - [PFD2_RAT]	1	1	2	2			1.09203				0.966673				0.793412				1.76492				1.0243				0.707013				1.17671				1.77241				1.22454		46.54		16.5696	6.58057
P50398	Rab GDP dissociation inhibitor alpha OS=Rattus norvegicus OX=10116 GN=Gdi1 PE=1 SV=1 - [GDIA_RAT]	1	2	5	27	0.587368	1.00696	1.41722	0.699292	0.772688	1.18556	1.48254	1.30518	1.4429	1.40219	1.23747	0.746101	1.38446	1.19994	0.819367	0.903724	1.52219	1.38073	0.977286	1.2959	1.62046	1.23763	1.36798	0.789733	1.11836	0.838178	1.49847	1.03947	1.44112	0.692305	1.20036	1.25803	1.42856	1.22665	1.32162	1.01209	164.887	6	50.5042	5.13525
P19944	60S acidic ribosomal protein P1 OS=Rattus norvegicus OX=10116 GN=Rplp1 PE=3 SV=1 - [RLA1_RAT]	1	1	1	27	2.29566	1.1466	0.944083	1.33404	1.48617	0.951633	1.2952	0.795174	0.923079	0.861869	0.754484	1.17794	0.733021	0.937272	1.45587	0.89888	0.737899	1.22451	0.948044	0.863326	0.84101	0.844031	0.881479	0.919367	1.15477	1.35526	0.776249	1.09484	1.06753	1.45966	1.38853	0.751691	0.958889	0.84823	1.31851	1.30819	168.742	1	11.4907	4.32275
B5DF63	Sarcolemmal membrane-associated protein OS=Rattus norvegicus OX=10116 GN=Slmap PE=1 SV=1 - [B5DF63_RAT]	5	9	13	43	1.46353	1.07896	0.875161	0.999577	1.20856	1.01449	1.00725	1.06254	0.843689	0.970792	0.976013	0.981109	0.793748	0.943127	0.961652	1.17505	0.786467	1.05484	0.927127	1.09717	0.802865	0.973108	0.852026	1.10829	1.03253	1.34427	1.07142	1.16815	1.0001	1.26847	1.23296	1.01899	1.0055	0.914726	0.959947	1.14778	309.846	9	85.9677	5.2876
Q66HA6	ADP-ribosylation factor-like protein 8B OS=Rattus norvegicus OX=10116 GN=Arl8b PE=2 SV=1 - [ARL8B_RAT]	2	2	2	9	0.789714	0.941077			1.14268	1.11391			1.40743	1.21961			1.32034	1.07611			1.22962	1.03641			1.3399	1.03868			1.10155	0.809654			1.10856	0.495943			1.23533	1.32961			78.3267	2	21.5251	8.42627
B4F7A3	Galectin OS=Rattus norvegicus OX=10116 GN=Lgalsl PE=1 SV=1 - [B4F7A3_RAT]	1	1	2	8	2.08746		0.716097	1.05587	1.39509		0.810747	0.589386	1.0225		0.78395	0.919025	0.832278		1.15947	0.733207	0.88894		0.70228	1.09016	0.912844		0.9156	0.469261	1.50159		0.871612	0.921334	1.36188		1.15967	0.656843	1.13378		0.96237	1.16447	43.44	2	18.9436	5.35107
P48199	C-reactive protein OS=Rattus norvegicus OX=10116 GN=Crp PE=1 SV=1 - [CRP_RAT]	2	1	3	19	1.98858	1.51192	0.512978	1.19113	2.28867	1.20244	1.19762	0.721647	0.620233	1.35487	0.72742	1.33132	0.697256	0.546177	1.02011	0.561069	0.823641	0.736033	0.628302	0.589784	0.898967	1.09964	0.756569	0.670752	2.11966	1.39148	0.571765	0.880457	1.83626	0.869023	1.32547	0.582029	0.984413	0.66346	0.617323	0.701929	103.201	4	25.4517	4.99561
A0A0G2K5E6	60S ribosomal protein L30-like OS=Rattus norvegicus OX=10116 GN=LOC108351936 PE=4 SV=1 - [A0A0G2K5E6_RAT]	2	1	1	1	0.545802				1.01425				1.16621				1.35142				1.30322				1.09092				0.72398				1.43868				1.07385				31.96		12.8038	9.87646
D4AEH9	Amylo-1, 6-glucosidase, 4-alpha-glucanotransferase (Glycogen debranching enzyme, glycogen storage disease type III) (Predicted), isoform CRA_a OS=Rattus norvegicus OX=10116 GN=Agl PE=1 SV=1 - [D4AEH9_RAT]	1	9	16	57	0.644295	0.978064	1.2176	0.75448	1.13724	1.25798	1.19665	1.61693	1.33716	1.39221	1.10935	0.571839	1.3829	1.05251	0.447042	1.31914	1.31381	1.2249	1.05315	0.876845	1.24423	0.870494	1.40588	0.710983	1.05824	0.685229	1.3694	1.28251	1.19959	0.605021	1.05409	0.98223	1.07823	1.34991	0.722816	1.16897	220.701	11	174.22	6.7417
Q4G069	Regulator of microtubule dynamics protein 1 OS=Rattus norvegicus OX=10116 GN=Rmdn1 PE=2 SV=1 - [RMD1_RAT]	3	1	3	9																																					42.3688		35.3782	7.73779
P02769	SWISS-PROT:P02769 (Bos taurus) Bovine serum albumin precursor	1	2	9	229	1.94735		0.881045	1.11034	1.32452		0.887246	0.640989	1.05731		0.913673	0.997444	0.872616		1.23031	0.691935	0.96619		1.17757	0.327834	0.883617		0.722971	0.988469	2.26565		0.726929	0.945051	1.32072		1.26591	0.707138	1.28947		0.228762	0.711346	1542.79	62	69.2484	6.17627
F7FJQ3	NPC intracellular cholesterol transporter 2 OS=Rattus norvegicus OX=10116 GN=Npc2 PE=1 SV=1 - [F7FJQ3_RAT]	1	1	2	8	1.82124		1.07132	1.43086	1.08949		1.11708	0.695892	0.856798		1.03851	1.28839	0.384942		2.26177	1.21955	0.544509		1.35039	0.757223	0.616859		1.03301	1.8535	1.03806		1.07022	1.3329	0.710609		1.81337	1.25173	0.688466		0.973991	1.3441	51.61	3	16.7376	7.92822
B0K013	Chchd8 protein OS=Rattus norvegicus OX=10116 GN=Coa4 PE=2 SV=1 - [B0K013_RAT]	1	1	1	1																																					29.26		10.2018	7.37158
P63031	Mitochondrial pyruvate carrier 1 OS=Rattus norvegicus OX=10116 GN=Mpc1 PE=3 SV=1 - [MPC1_RAT]	1	1	2	3			0.873244				0.62737				0.793509				0.960358				0.529904				1.12916				2.34739				1.10479				0.619772		43.73		12.4463	9.61279
Q3MHS9	Chaperonin containing Tcp1, subunit 6A (Zeta 1) OS=Rattus norvegicus OX=10116 GN=Cct6a PE=1 SV=1 - [Q3MHS9_RAT]	2	4	7	12			1.06469	0.823586			1.27209	0.763231			1.90916	0.827697			0.802952	1.26359			1.09331	1.28906			1.27009	1.14753			1.34077	0.963897			1.11576	1.33362			1.64299	1.03254	75.19	5	57.9807	7.07861
A0A140TA99	Elongin-B OS=Rattus norvegicus OX=10116 GN=Elob PE=1 SV=1 - [A0A140TA99_RAT]	3	1	2	6	1.73274		0.876145	1.03174	1.16788		1.16779	0.767236	0.832255		0.884759	1.21064	0.799137		1.20833	0.82275	0.848051		1.04775	0.730873	0.796098		0.787231	0.839556	0.887899		0.827475	1.04485	0.912879		1.58781	0.966616	0.992854		0.914498	0.968563	29.4891	3	13.0306	5.0083
Q63569	26S proteasome regulatory subunit 6A OS=Rattus norvegicus OX=10116 GN=Psmc3 PE=1 SV=1 - [PRS6A_RAT]	2	1	3	4			1.10843				0.886672				0.912178				1.34425				1.03131				0.967468				1.00828				1.01764				1.23252		32.84		49.1294	5.23682
A0A140TAI3	Heterogeneous nuclear ribonucleoprotein C, isoform CRA_b OS=Rattus norvegicus OX=10116 GN=Hnrnpc PE=1 SV=1 - [A0A140TAI3_RAT]	4	1	4	8				0.912244				0.69895				1.48554				0.790769				0.663227				0.989871				0.914881				0.987201				0.726322	49.4767	2	32.3029	5.08447
D3ZFY8	Similar to ubiquitin-conjugating enzyme E2 variant 1 OS=Rattus norvegicus OX=10116 GN=LOC100912618 PE=1 SV=1 - [D3ZFY8_RAT]	2	1	2	2	1.29922				0.944674				1.05073				1.01605				1.09052				1.06776				1.157				1.01341				1.03491				41.07		16.3442	7.95752
P10960	Prosaposin OS=Rattus norvegicus OX=10116 GN=Psap PE=1 SV=1 - [SAP_RAT]	2	5	6	69	1.9986	0.868848	1.26144	1.59644	1.17099	0.595257	0.825265	0.661465	0.722194	0.481556	1.18909	1.05339	0.570908	0.811923	2.2522	1.31081	0.501525	0.974739	1.14037	0.26276	0.702919	0.926019	0.603085	1.66934	0.903022	1.77905	0.928793	1.31372	0.779307	1.88759	1.17974	0.779005	0.713317	0.568651	0.485348	1.08093	253.122	23	61.0836	5.24951
P50399	Rab GDP dissociation inhibitor beta OS=Rattus norvegicus OX=10116 GN=Gdi2 PE=1 SV=2 - [GDIB_RAT]	1	1	5	15		1.14214	1.26741	0.904772		1.15204	1.06895	0.990168		1.32479	1.42547	0.912042		1.20048	0.835381	1.27595		0.930447	1.77114	1.25588		1.04576	1.2204	1.2262		1.06727	1.19091	1.18393		0.761497	0.92348	1.16116		1.19034	1.47145	0.942598	96.22	4	50.5047	6.25244
F1M4G6	Uncharacterized protein OS=Rattus norvegicus OX=10116 PE=3 SV=1 - [F1M4G6_RAT]	3	1	3	119		0.804444				1.37984				0.660871				0.789816				0.768796				1.81215				1.0596				1.32063				1.34813			452	31	33.9629	7.86963
P0C089	Phosphatidylglycerophosphatase and protein-tyrosine phosphatase 1 OS=Rattus norvegicus OX=10116 GN=Ptpmt1 PE=1 SV=1 - [PTPM1_RAT]	2	1	2	2		1.13172				0.772532				1.27484				0.901138				1.57192				0.74259				1.02637				1.45063				1.04512			29.77		21.8725	9.5835
O88321	Antisecretory factor OS=Rattus norvegicus OX=10116 GN=Psmd4 PE=1 SV=1 - [O88321_RAT]	1	2	4	21	1.72157	1.19046	1.06787	1.1152	1.26004	0.887923	1.07642	0.723562	0.529207	0.921158	0.933488	1.28982	0.513566	0.982772	1.50377	1.06016	0.442537	1.11469	1.14021	0.844256	0.849601	1.13761	0.819844	1.22268	0.970234	1.27101	1.12692	1.13922	0.778186	1.70811	1.38092	0.832709	0.780656	0.93401	1.01552	1.09272	100.79	5	41.0474	4.80518
F1LZY6	Uncharacterized protein OS=Rattus norvegicus OX=10116 PE=1 SV=2 - [F1LZY6_RAT]	2	1	1	7	1.11507	0.853771	0.391365	1.58754	1.42856	0.736158	0.671423	0.507068	1.34244	0.699863	0.683889	1.60568	0.794727	0.915886	1.73762	0.375608	1.18414	1.16781	1.26207	0.693537	0.764597	1.13512	0.521654	0.603463	1.29807	1.1001	0.660326	0.57747	1.73817	1.78216	1.10035	0.668281	1.39573	0.607562	0.805919	0.838541	96.38	1	10.4761	4.71631
A1L1M0	Protein kinase, cAMP-dependent, catalytic, alpha OS=Rattus norvegicus OX=10116 GN=Prkaca PE=1 SV=1 - [A1L1M0_RAT]	3	2	5	23	0.709369	0.988229	0.707514	0.756866	0.96275	1.15697	0.999016	1.34974	1.08593	1.41193	1.10452	0.64074	1.18026	1.0877	0.804383	1.05556	1.2745	1.21062	0.992913	1.59805	1.32307	1.07182	1.34011	0.815453	1.03532	0.655296	1.07836	0.915118	1.09888	0.58268	0.855277	1.14882	1.02511	1.14975	0.869498	0.999546	122.124	5	40.58	8.79248
G3V803	Cadherin-2 OS=Rattus norvegicus OX=10116 GN=Cdh2 PE=1 SV=1 - [G3V803_RAT]	2	3	6	40	1.06099	1.16366	0.879514	0.771731	0.938298	0.847934	1.06684	0.881188	0.875599	0.908553	0.864663	0.700451	0.750144	1.03574	1.5329	0.989125	0.841883	1.06658	0.854491	0.872737	0.848769	1.28002	0.847301	0.663002	1.12885	0.909313	0.820895	0.913259	0.946316	1.19095	0.978416	0.954245	1.05255	1.02205	1.26207	0.773529	117.144	4	99.6064	4.77979
Q2TA68	Dynamin-like 120 kDa protein, mitochondrial OS=Rattus norvegicus OX=10116 GN=Opa1 PE=1 SV=1 - [OPA1_RAT]	2	6	12	40	0.72781	0.916456	0.997764	0.74113	1.06539	1.11252	0.835364	1.36932	1.06804	1.24312	1.10018	0.856634	1.15128	1.1269	0.731413	1.11714	1.05903	0.91833	0.872894	1.31747	1.02391	0.91621	1.17021	0.842665	0.91636	0.694901	0.976333	0.874743	1.02202	0.506509	0.855298	1.08512	1.04049	1.12504	0.802959	1.01739	148.713	9	111.238	7.53271
P21807	Peripherin OS=Rattus norvegicus OX=10116 GN=Prph PE=1 SV=1 - [PERI_RAT]	5	1	6	38		0.922172				0.977203				0.692892				1.22818				1.34478				0.945111				1.00742				1.63224				1.10007			138.605	9	53.5173	5.46533
F1M779	Clathrin heavy chain OS=Rattus norvegicus OX=10116 GN=Cltc PE=1 SV=1 - [F1M779_RAT]	2	15	20	102	0.767322	0.849891	1.08111	0.622913	0.934094	1.18706	1.15576	1.37001	1.22204	1.18345	1.04225	0.502428	1.36213	1.11105	0.54045	0.995237	1.27122	1.0971	0.980523	1.27073	1.19434	0.852087	1.37035	0.680201	0.966672	0.696848	1.11808	0.807194	1.0023	0.548803	0.889998	1.15082	1.1375	1.26705	0.966158	0.898675	488.137	18	191.438	5.69385
G3V9E3	Caldesmon 1, isoform CRA_b OS=Rattus norvegicus OX=10116 GN=Cald1 PE=1 SV=1 - [G3V9E3_RAT]	3	2	6	20		1.23538	0.904742			0.873476	0.946167			0.560089	0.899317			1.05581	1.73958			0.974269	1.29347			1.15252	0.670924			1.27693	0.718986			2.21014	1.71806			0.939786	1.61149		76.4729	7	60.5758	6.58057
D3ZHP8	Uncharacterized protein OS=Rattus norvegicus OX=10116 PE=1 SV=1 - [D3ZHP8_RAT]	2	2	3	5		0.975764	0.998224			1.48962	1.02849			1.49829	1.04611			1.39018	0.639527			1.13851	1.08784			1.05738	1			1.03989	1.04332			0.931705	0.807433			1.21993	0.939782		84.75		34.4106	9.70068
F1M5T1	Ferritin OS=Rattus norvegicus OX=10116 GN=LOC100359668 PE=3 SV=2 - [F1M5T1_RAT]	6	1	2	13		1.03421	1.29194	1.04885		0.781295	0.946509	0.693617		1.00181	0.858712	1.30133		0.961405	0.864624	1.27493		1.02018	1.47631	1.04898		0.823452	0.763749	1.00068		1.10913	0.743557	0.84924		1.07139	0.747614	0.932209		0.941935	1.33676	0.884261	69.58	2	20.7057	6.65381
M0RB63	RCG63041 OS=Rattus norvegicus OX=10116 GN=LOC684509 PE=4 SV=1 - [M0RB63_RAT]	2	1	1	10	0.802987	0.995541	0.881994	0.749764	1.12677	1.07111	1.42032	1.11518	1.58748	1.4392	1.35156	0.680569	1.21741	1.25737	0.781081	1.11855	1.11265	1.03687	1.19338	1.05052	1.07978	0.908373	1.25684	0.923138	0.994304	1.00055	1.16397	0.902628	1.07931	0.75847	1.02055	0.908756	1.11721	1.10291	0.715279	1.00416	52.61	2	9.36582	9.12939
P05506	NADH-ubiquinone oxidoreductase chain 3 OS=Rattus norvegicus OX=10116 GN=Mtnd3 PE=3 SV=3 - [NU3M_RAT]	1	1	1	10	0.63116	1.01266			0.852252	1.15587			1.10582	1.24501			1.18197	1.19753			1.00962	1.04378			1.03544	1.08032			0.892504	0.754377			0.916767	0.615045			1.09245	1.10846			51.0233	3	13.0779	4.43701
O08589	Phospholemman OS=Rattus norvegicus OX=10116 GN=Fxyd1 PE=1 SV=2 - [PLM_RAT]	2	1	1	6	0.829154	1.20577		0.846246	1.24945	0.764778		1.64125	1.11986	1.50313		0.952084	0.908602	0.885289		1.06405	1.02501	1.01909		1.51818	1.0537	1.31072		0.77035	1.00889	1.23752		1.12194	0.852772	0.842348		1.02464	0.833795	1.00241		1.10097	55.74	2	10.3584	8.54346
P60901	Proteasome subunit alpha type-6 OS=Rattus norvegicus OX=10116 GN=Psma6 PE=1 SV=1 - [PSA6_RAT]	2	1	3	5	0.522749				0.715279				0.980893				1.07008				1.36804				1.08236				0.757305				1.12238				0.876213				52.5667		27.3818	6.75635
A0A0G2K6E2	Thioredoxin reductase 2, isoform CRA_a OS=Rattus norvegicus OX=10116 GN=Txnrd2 PE=1 SV=1 - [A0A0G2K6E2_RAT]	4	1	5	6	0.658046				0.731304				1.31208				1.22207				1.24055				1.34489				1.01964				1.14878				1.11988				43.96	1	56.3319	8.55811
O08776	NADH dehydrogenase [ubiquinone] 1 alpha subcomplex assembly factor 3 OS=Rattus norvegicus OX=10116 GN=Ndufaf3 PE=2 SV=1 - [NDUF3_RAT]	1	1	1	2		1.217		1.04634		1.00439		0.949106		0.918741		0.996852		1.08163		1.18147		1.19064		0.679891		1.3558		0.985916		1.45733		0.945454		1.62795		0.927901		0.859174		0.96807	46.19	1	20.6834	7.84033
G3V6S0	Spectrin beta chain OS=Rattus norvegicus OX=10116 GN=Sptbn1 PE=1 SV=3 - [G3V6S0_RAT]	3	16	24	58	0.813444	0.952648	1.06398	0.805811	1.09835	1.17729	0.965371	0.990041	1.23145	1.03977	1.0624	0.563711	1.30145	1.12865	0.765853	1.05529	1.34113	0.977265	0.991733	1.06583	1.23511	0.878987	1.08344	0.910878	1.033	0.926754	1.19594	0.9813	1.08916	0.659083	1.11308	1.14475	1.36143	1.09375	1.17686	0.978829	207.224	5	273.146	5.73193
P54313	Guanine nucleotide-binding protein G(I)/G(S)/G(T) subunit beta-2 OS=Rattus norvegicus OX=10116 GN=Gnb2 PE=1 SV=4 - [GBB2_RAT]	5	2	3	9	0.896559	1.09167	0.880289	0.913175	0.971205	1.06567	1.20678	1.5096	1.13466	1.30247	0.913974	0.987908	1.25371	1.21717	0.948276	0.957427	1.41317	1.11756	0.974201	1.19106	1.06858	1.09185	1.07362	0.668254	1.24247	0.878614	0.8411	1.05667	1.13267	0.963026	0.870982	1.12843	1.10393	1.11852	0.921605	1.40338	64.9	1	37.3071	5.99854
P41499	Tyrosine-protein phosphatase non-receptor type 11 OS=Rattus norvegicus OX=10116 GN=Ptpn11 PE=1 SV=4 - [PTN11_RAT]	1	3	6	12	0.87182	1.05483	1.21632		0.927693	1.07385	0.703541		1.21299	1.0192	1.38494		1.42952	1.23455	1.58316		1.38828	0.930877	1.15486		0.840258	1.05162	0.89699		1.25501	0.574875	0.954492		1.11299	0.832477	0.974287		1.11544	1.08786	1.94885		52.49		68.4154	7.28369
A0A0H2UHU0	40S ribosomal protein S25 OS=Rattus norvegicus OX=10116 GN=Rps25 PE=4 SV=1 - [A0A0H2UHU0_RAT]	6	2	2	12	0.888535	0.848345		1.03853	1.0234	0.874685		1.00535	0.948816	1.10618		0.950692	1.22806	1.09662		1.18982	1.15572	1.02712		1.42634	1.10003	0.760317		1.16229	1.11465	1.02269		0.885733	0.82898	0.822438		0.831581	0.888233	1.21792		1.0748	57.34	3	13.6027	10.1108
P62832	60S ribosomal protein L23 OS=Rattus norvegicus OX=10116 GN=Rpl23 PE=2 SV=1 - [RL23_RAT]	1	1	2	2	0.880566				0.995142				1.05792				1.17923				1.03589				1.33524				0.950605				0.985078				1.09859				41.76		14.8561	10.5063
Q4V8H5	Aspartyl aminopeptidase OS=Rattus norvegicus OX=10116 GN=Dnpep PE=1 SV=1 - [Q4V8H5_RAT]	1	2	5	8	0.479819				0.828685				1.48181				1.53287				1.5857				1.47455				0.802067				0.981639				1.16363				44.46	2	52.5219	7.25439
Q6MG34	RT1 class I, CE10 OS=Rattus norvegicus OX=10116 GN=RT1-CE10 PE=1 SV=1 - [Q6MG34_RAT]	21	1	4	15	1.14732	0.950286	1.10749	1.03302	0.490578	0.834483	0.467567	1.06778	1.21918	0.650876	0.72026	0.340875	1.17692	1.21827	1.27583	1.05457	1.44993	1.18758	1.01879	1.34737	0.917549	1.26693	1.13935	0.584296	0.775976	1.1393	1.89253	0.694028	0.353977	0.683757	0.346471	0.550497	1.03817	1.23897	0.522579	1.55094	71.5667	3	40.8784	6.16357
P10817	Cytochrome c oxidase subunit 6A2, mitochondrial (Fragment) OS=Rattus norvegicus OX=10116 GN=Cox6a2 PE=1 SV=3 - [CX6A2_RAT]	2	1	1	27	1.41222	1.12961	0.722066	1.00364	0.938688	0.931117	1.09131	1.00725	1.06316	1.02427	1.0678	0.855235	0.897172	0.98894	1.17595	1.15776	0.97468	1.08919	1.08245	1.03102	0.917385	0.93834	1.0801	1.29685	0.864199	1.21943	1.03411	1.25489	0.99121	0.878631	2.22889	1.15692	0.950227	0.833532	0.691147	1.14609	207.015	6	10.4803	9.0708
P50503	Hsc70-interacting protein OS=Rattus norvegicus OX=10116 GN=St13 PE=1 SV=1 - [F10A1_RAT]	1	3	4	19	1.59385	1.23274	0.892001	1.23614	0.949046	0.762852	1.16338	0.817802	0.911625	0.778225	0.888116	1.17575	0.776648	0.871135	1.383	0.761862	0.779808	1.04371	0.864901	0.863492	0.730531	1.13471	0.848837	0.908733	1.07454	1.32047	0.885752	1.0863	0.896976	2.05317	1.54663	0.946276	1.02835	0.795435	1.01783	1.17988	107.62	5	41.2534	5.38916
F1M2K3	Small ubiquitin-related modifier OS=Rattus norvegicus OX=10116 GN=Sumo2 PE=3 SV=2 - [F1M2K3_RAT]	3	1	1	24	1.92874	0.98555	0.986884	1.26011	1.052	0.613662	0.964931	0.671381	0.590989	0.522689	0.930935	1.46512	0.469012	0.742967	1.79625	0.929401	0.537536	1.06267	0.99742	0.750634	0.576147	0.963588	0.58544	1.28034	0.993048	1.28196	0.674221	1.07182	0.784567	2.10833	1.71343	0.87837	0.716514	0.530424	1.30413	1.09946	150.301	9	10.7633	5.50342
Q5HZA9	Transmembrane protein 126A OS=Rattus norvegicus OX=10116 GN=Tmem126a PE=2 SV=1 - [T126A_RAT]	1	1	2	4	0.737441		1.83201		0.943379		1.71389		1.80808		2.09911		1.59627		0.952612		1.59594		1.40856		1.94195		2.71578		1.24419		1.85088		1.40826		2.09963		1.13016		1.43952		39.09		21.6436	9.53955
Q6P7S1	Acid ceramidase OS=Rattus norvegicus OX=10116 GN=Asah1 PE=1 SV=1 - [ASAH1_RAT]	2	1	3	15	0.96226	1.09951		1.30002	1.02864	1.07606		1.57151	1.1671	1.44733		1.13152	1.24114	1.01294		0.840194	1.37874	1.06439		1.45373	1.1325	1.02394		0.478012	1.50097	1.03909		0.94639	1.16009	0.782767		1.21965	1.36999	1.19007		1.13604	52.11	3	44.4148	8.30908
Q63910	Alpha globin OS=Rattus norvegicus OX=10116 GN=Hba-a3 PE=1 SV=2 - [Q63910_RAT]	2	1	3	111	1.03296	0.909185		0.941811	1.47191	1.6761		0.687829	0.624435	1.10597		2.4591	0.672062	0.474169		0.635554	0.763467	0.522427		0.585061	2.09325	0.605571		2.66806	2.23366	0.709658		0.572125	2.57851	0.993527		1.34283	0.792634	0.656038		0.588447	381.257	26	15.515	8.22119
D4A471	COX assembly mitochondrial protein OS=Rattus norvegicus OX=10116 GN=Cmc2 PE=1 SV=1 - [D4A471_RAT]	1	1	1	6		0.922773				0.701153				0.459643				0.705072				1.09382				0.818668				1.81872				2.03274				0.500772			41.41		9.40256	7.88428
Q9JHL4	Drebrin-like protein OS=Rattus norvegicus OX=10116 GN=Dbnl PE=1 SV=1 - [DBNL_RAT]	1	2	4	22	1.27059	0.941856	1.1432	1.0771	1.6002	0.949128	1.37452	1.16881	0.911098	0.931506	1.0061	0.983048	2.21892	1.00589	1.39206	1.18462	1.09836	1.18367	1.25061	0.972179	1.04559	0.967489	1.08582	0.922163	0.909032	0.969862	0.971684	0.991066	1.01797	1.18492	1.19981	0.850321	1.30593	0.888079	1.35576	1.2623	84.23	6	48.5825	4.91943
Q6AXS5	Plasminogen activator inhibitor 1 RNA-binding protein OS=Rattus norvegicus OX=10116 GN=Serbp1 PE=1 SV=2 - [PAIRB_RAT]	1	2	4	13	0.661634	0.747778	1.07401	0.968416	1.0304	0.652199	1.37776	0.852758	0.523099	0.796486	1.26054	1.81999	0.636249	0.924683	1.03408	1.25359	0.639315	1.02098	1.51124	0.984575	0.712628	0.734717	0.707121	1.47595	0.627753	1.02801	0.718513	1.14156	0.795918	2.55343	1.34952	1.10716	0.603542	0.671683	1.70342	0.901987	136.59	3	44.7273	8.54346
Q5U2X8	Acyl-CoA thioesterase 9 OS=Rattus norvegicus OX=10116 GN=Acot9 PE=1 SV=1 - [Q5U2X8_RAT]	1	1	3	5	0.675065		0.899001		1.0709		1.04376		1.18013		1.12327		1.36492		0.665929		1.17717		0.987525		1.31327		1.08997		0.835348		0.902838		1.16022		0.765902		1.08258		1.02909		55.29		50.4109	8.63135
E2RUH2	Ribonuclease inhibitor OS=Rattus norvegicus OX=10116 GN=Rnh1 PE=1 SV=1 - [E2RUH2_RAT]	3	1	4	9			1.22144				1.08801				1.45612				0.704245				1.00033				0.882714				1.30863				1.11456				1.48192		46.99		49.8871	4.79248
Q505J9	ATPase family AAA domain-containing protein 1 OS=Rattus norvegicus OX=10116 GN=Atad1 PE=1 SV=1 - [ATAD1_RAT]	3	1	3	16	0.92886	0.987478	1.01514	0.851093	1.37396	1.36898	1.15901	1.18592	1.1198	1.48553	1.11536	0.681618	1.3189	1.13844	0.749559	1.06165	1.25653	1.27221	1.1867	0.964553	1.22653	1.0526	1.35658	0.727899	0.984862	0.962043	1.12496	0.941267	1.13913	0.888307	1.03081	1.14234	1.13007	1.14352	0.749548	0.864177	92.11	5	40.691	6.90283
B2RYP0	Ras homolog family member C OS=Rattus norvegicus OX=10116 GN=Rhoc PE=1 SV=1 - [B2RYP0_RAT]	5	1	2	11	1.07261	1.4194	0.896554	0.956108	0.957869	1.18986	1.34818	1.42216	1.27944	1.30726	0.903935	0.635023	1.38903	1.11494	0.883732	1.12394	1.28753	1.10694	0.957046	0.530538	1.14008	1.20681	1.35579	0.702563	1.11163	0.997601	1.31838	1.07509	1.25835	0.75131	1.01693	1.06488	1.15626	1.21243	0.400934	1.16583	59.7833	2	22.0223	6.58057
Q63083	Nucleobindin-1 OS=Rattus norvegicus OX=10116 GN=Nucb1 PE=1 SV=1 - [NUCB1_RAT]	1	3	4	14	0.956722	1.33118	1.00414	1.10794	0.806866	1.00018	0.834009	0.870453	0.564203	0.857932	0.919011	1.12428	0.651937	1.18839	1.28597	1.05807	0.657635	1.15007	1.06353	0.821318	1.00245	1.15283	0.751016	1.14074		1.29556	1.02585	1.1515	0.698259	1.49973	1.55074	0.748223	0.845727	0.941903	1.32347	1.03002	124.56	4	53.4739	5.12256
A1L108	Actin-related protein 2/3 complex subunit 5-like protein OS=Rattus norvegicus OX=10116 GN=Arpc5l PE=1 SV=2 - [ARP5L_RAT]	1	1	2	3	1.58045				0.999382				0.822674				0.811719				0.848026				0.790337				1.08468				1.01964				0.866115				55.99		16.9998	6.80029
A0A0G2JU43	Dynein light chain OS=Rattus norvegicus OX=10116 GN=LOC100361920 PE=3 SV=1 - [A0A0G2JU43_RAT]	3	1	1	8	0.85877	1.06033	1.03184	0.814177	0.963985	1.25087	1.0992	0.958073	0.972616	1.52221	1.16857	0.781629	1.10562	1.20898	0.8235	0.978634	1.06042	1.26305	1.06936	0.805165	0.857572	0.74493	1.00515	1.3724	0.920851	0.970121	0.82647	0.925368	0.966921	0.64915	0.811637	1.13296	1.09127	1.50662	0.630709	0.870746	48.94	2	10.4963	7.40088
P35565	Calnexin OS=Rattus norvegicus OX=10116 GN=Canx PE=1 SV=1 - [CALX_RAT]	1	5	7	35	1.02015	1.10112	0.869181	0.891483	0.83285	1.02208	1.0196	1.13153	1.10248	0.950844	0.91693	0.667325	0.98675	1.03918	1.25911	0.876039	0.874438	0.941224	0.799153	1.21981	0.940992	1.10565	1.0836	0.67908	1.20894	1.22839	1.04636	0.979234	1.13021	0.825941	0.940563	0.818233	1.02826	0.935165	1.02319	1.1549	217.529	8	67.2126	4.62744
Q6AYQ4	Transmembrane protein 109 OS=Rattus norvegicus OX=10116 GN=Tmem109 PE=2 SV=1 - [TM109_RAT]	1	1	3	9	1.16326	0.975263	0.976321		1.50767	1.36621	1.2087		1.03956	1.06824	0.906446		1.12155	1.27871	0.934728		1.08732	1.08289	1.32469		0.974059	1.02635	0.990493		0.964043	1.13091	0.963235		1.10666	0.893216	0.919802		1.0794	1.10613	0.917571		73.29		26.2254	9.77393
A0A0G2JTY6	G-rich RNA sequence-binding factor 1 OS=Rattus norvegicus OX=10116 GN=Grsf1 PE=1 SV=1 - [A0A0G2JTY6_RAT]	2	1	3	22	1.67975	1.27212	1.39166	1.32135	1.37257	0.817644	1.25058	0.842791	0.721492	0.922095	1.07025	1.26938	0.652635	1.03029	1.84875	1.00396	0.766746	0.920779	1.11967	0.920846	0.485071	1.02133	0.938684	1.14433	0.911023	1.36842	0.996841	1.00493	1.02473	1.5071	1.84976	0.719657	0.824005	0.779942	1.51187	1.1682	133.054	5	43.5216	5.2749
D4ADG2	IBA57, iron-sulfur cluster assembly OS=Rattus norvegicus OX=10116 GN=Iba57 PE=1 SV=1 - [D4ADG2_RAT]	1	1	2	2																																					53.33		38.6491	9.12939
P06399	Fibrinogen alpha chain OS=Rattus norvegicus OX=10116 GN=Fga PE=1 SV=3 - [FIBA_RAT]	2	5	8	22	0.913867	0.868858		0.501645	1.05878	1.15648		1.01021	1.11442	0.839247		0.552585	1.24085	1.20548		0.791368	1.35018	1.0324		0.707088	1.53551	0.76873		0.659244	2.03177	0.703526		0.851782	0.968473	0.798606		1.02475	1.53108	0.889371		0.593148	99.0514	3	86.6319	5.74463
P14841	Cystatin-C OS=Rattus norvegicus OX=10116 GN=Cst3 PE=1 SV=2 - [CYTC_RAT]	1	1	1	1	1.33717				0.875506				0.835368				0.821981				0.843789				0.873794				0.846613				0.857161				0.948797				30.48		15.4268	9.21729
Q6AYF2	LIM and cysteine-rich domains 1 OS=Rattus norvegicus OX=10116 GN=Lmcd1 PE=1 SV=1 - [Q6AYF2_RAT]	1	2	4	13	0.738609	0.929363	1.09257	0.837472	0.994343	1.10486	1.10796	0.899446	1.17992	1.17652	0.909982	0.84465	1.07626	1.27345	0.847802	1.01979	1.08304	1.23951	0.956413	1	0.959148	1.14098	0.955058	1.01911	1.02317	0.892056	0.945728	1.04558	1.09019	1.05202	1.06109	0.935014	1.12321	1.16255	1.11029	0.923357	62.4633	3	41.0582	8.01611
A0A0G2K890	Ezrin OS=Rattus norvegicus OX=10116 GN=Ezr PE=1 SV=1 - [A0A0G2K890_RAT]	4	2	7	27			0.99745				1.10543				0.942381				0.862123				0.969831				0.968773				1.01931				1.35617				0.933716		76.3267	7	69.2446	6.1001
D3ZYU4	COX20 cytochrome C oxidase assembly factor OS=Rattus norvegicus OX=10116 GN=Cox20 PE=1 SV=1 - [D3ZYU4_RAT]	1	1	1	2																																					48.35	1	13.0698	9.01221
D3ZTE0	Coagulation factor XII OS=Rattus norvegicus OX=10116 GN=F12 PE=2 SV=1 - [FA12_RAT]	2	1	6	15		1.22881	0.917478			0.831105	0.82366			0.621521	0.897438			0.969757	1.15701			0.848443	1.13786			1.00073	1.06235			1.14158	0.863851			1.63293	1.1195			0.845546	1.15927		46.32	3	65.8007	7.45947
F1LN92	AFG3-like matrix AAA peptidase subunit 2 OS=Rattus norvegicus OX=10116 GN=Afg3l2 PE=1 SV=1 - [F1LN92_RAT]	2	4	8	13	0.746319	1.09705	1.18066		0.984668	1.18114	1.00271		1.20516	1.22622	1.12563		1.0079	1.13328	0.663179		1.0447	1.01912	1.00423		1.31814	1.12444	1.29683		0.891088	0.715115	1.10103		1.15392	0.820107	0.793346		0.939973	1.23974	1.00524		91.77		89.2955	8.60205
P61972	Nuclear transport factor 2 OS=Rattus norvegicus OX=10116 GN=Nutf2 PE=1 SV=1 - [NTF2_RAT]	1	1	2	6	1.58311	1.15073	0.879068		0.946777	0.780001	0.84644		0.641159	0.76334	0.713035		0.639163	0.74508	1.20216		0.728896	0.876488	0.90217		0.639751	0.930547	0.665307		0.93995	1.22786	0.813595		0.92108	1.20027	1.34623		0.798606	0.738067	0.989404		38.5083		14.469	5.37646
D3ZEV0	RCG63497 OS=Rattus norvegicus OX=10116 GN=Ybx1-ps3 PE=4 SV=1 - [D3ZEV0_RAT]	3	1	2	2			0.549727												0.627235																1.27938				0.747102		26.05		35.6956	9.87646
D4A5E5	Sarcoglycan, beta OS=Rattus norvegicus OX=10116 GN=Sgcb PE=4 SV=2 - [D4A5E5_RAT]	2	1	2	11	0.976424	1.01998	0.942635	0.589774	1.22135	0.955044	0.393482	0.894683	1.13387	1.24638	0.964924	0.697693	1.19787	1.01936	0.787073	0.722098	1.45805	1.0198	0.617738	1.26966	1.30882	0.859534	1.31821	0.563237	1.54541	0.57977	1.15614	1.05152	1.30182	0.83297	0.845801	0.898604	1.24284	0.841682	1.72231	1.03716	118.16	2	32.8258	8.6167
B5DFN4	Prefoldin 5 (Predicted), isoform CRA_a OS=Rattus norvegicus OX=10116 GN=Pfdn5 PE=1 SV=1 - [B5DFN4_RAT]	1	1	1	3				1.2047				0.949828				0.991024				1.21396				0.93641				1.17893				1.25066				1.06883				0.906411	30.25	1	17.315	6.32861
D3ZL85	Cytochrome c heme lyase OS=Rattus norvegicus OX=10116 GN=Hccs PE=1 SV=1 - [D3ZL85_RAT]	1	2	2	2	1.46979	1.00609			0.848021	1.12649			0.829371	1.15223			1.10338	1.13235			1.05661	1.24437			0.933092	0.999654			1.52729	0.931586			1.04391	0.808393			1.03774	0.993841			39.33		31.1099	6.72705
Q811A2	Bone marrow stromal antigen 2 OS=Rattus norvegicus OX=10116 GN=Bst2 PE=1 SV=1 - [BST2_RAT]	1	1	2	4		1.05759	1.20094			0.85556	1.0273			0.710795	0.984906			0.711848	1.87947			0.951238	0.905408			1.22442	1.04796			1.02771	1.13839			0.996363	0.999882			0.827845	1.08367		41.54		19.6613	8.19189
F1LMM8	[Pyruvate dehydrogenase (acetyl-transferring)] kinase isozyme 2, mitochondrial OS=Rattus norvegicus OX=10116 GN=Pdk2 PE=1 SV=3 - [F1LMM8_RAT]	2	2	4	12	0.887373	1.20174	0.894637	0.76604	0.733582	1.12805	1.19891	1.23291	0.901841	1.4331	0.98387	0.749113	0.829641	1.17623	0.840799	1.17873	1.15033	1.05721	0.909904	1.34862	0.743253	0.889825	1.07858	1.05842	0.984252	1.11922	1.15939	0.857237	1.02508	0.885143	0.961927	1.02371	0.752096	1.22123	0.91762	0.98857	58.64	1	46.2103	7.35693
B4F7A5	CD99 molecule (Xg blood group) OS=Rattus norvegicus OX=10116 GN=Cd99 PE=1 SV=1 - [B4F7A5_RAT]	1	1	1	6		1.55519		1.268		0.758267		0.635321		0.731378		0.5963		0.965653		0.706958		1.26837		0.82392		1.3799		0.681032		2.10985		1.12697		1.72709		0.748304		0.730224		1.28428	33.51	1	16.5784	5.12256
Q9Z327	Synaptopodin OS=Rattus norvegicus OX=10116 GN=Synpo PE=1 SV=2 - [SYNPO_RAT]	2	5	7	26		0.927451	1.20554	1.04479		0.731632	1.22789	0.793483		0.66115	0.904016	1.22359		0.873223	1.29991	0.948793		1.09777	1.10232	0.862135		0.770405	0.578571	1.13212		1.34407	0.838126	1.06806		2.02185	1.78514	0.964201		0.700829	1.33356	0.963102	105.221	8	99.9244	9.36377
Q5M9H7	DnaJ (Hsp40) homolog, subfamily A, member 2 OS=Rattus norvegicus OX=10116 GN=Dnaja2 PE=1 SV=1 - [Q5M9H7_RAT]	1	1	2	4	1.19844				1.98109				1.10752				1.57148				0.991241				1.95944								1.8256				1.70578				39.2		45.7166	6.48096
D3ZYS7	G3BP stress granule assembly factor 1 OS=Rattus norvegicus OX=10116 GN=G3bp1 PE=1 SV=1 - [D3ZYS7_RAT]	2	3	4	8	1.42733	1.13802	0.979015	1.27443	1.08031	1.00995	1.2428	0.901423	0.691064	0.829142	1.00336	1.43335	0.685614	0.891065	1.67344	1.17349	0.619038	0.997055	0.89572	1.03487	0.821401	1.03376	0.856669	1.14424	0.925152	1.15002	0.75147	1.08548	0.92228	1.80905	1.63151	0.973579	0.963409	0.797941	1.47405	1.17251	80.8867	2	51.7548	5.59229
A0A140TAG9	Hsp90 co-chaperone Cdc37 OS=Rattus norvegicus OX=10116 GN=Cdc37 PE=1 SV=1 - [A0A140TAG9_RAT]	2	1	2	5	1.34263	0.949102			1.02342	0.771729			0.880637	0.952792			0.863379	0.843432			1.17842	0.814424			1.1779	1.16782			1.08313	1.03839			1.06952	0.899595			1.06514	0.824318			54.57		44.1538	5.56689
G3V8S6	Histidine rich calcium binding protein, isoform CRA_b OS=Rattus norvegicus OX=10116 GN=Hrc PE=1 SV=1 - [G3V8S6_RAT]	1	2	7	23	1.81081	1.08429		1.20535	1.44291	0.680818		0.60411	0.560942	0.680324		1.02225	0.544978	0.829122		0.904099	0.569654	0.893855		0.753511	0.748431	1.09968		0.738815	1.04587	1.43858		1.34368	1.08607	1.71409		0.848506	0.745343	0.532498		1.34854	97.6029	7	86.4517	4.53857
D3ZIC4	Protein phosphatase 1, regulatory (Inhibitor) subunit 12B (Predicted) OS=Rattus norvegicus OX=10116 GN=Ppp1r12b PE=1 SV=1 - [D3ZIC4_RAT]	1	3	8	20			1.24743				0.963908				0.894548				1.87667				1.15606				0.728015				0.705143				1.5313				1.39423		127.811	5	111.321	5.61768
P11661	NADH-ubiquinone oxidoreductase chain 5 OS=Rattus norvegicus OX=10116 GN=Mtnd5 PE=3 SV=3 - [NU5M_RAT]	1	4	5	46	0.619144	0.932529	0.911527	0.756796	1.24202	1.1662	0.883188	1.30248	1.35408	1.20727	1.10098	0.480819	1.25471	1.15919	0.554462	1.48722	1.16921	0.95239	1.15816	1.41802	1.24	0.935888	1.33847	1.0756	0.973691	0.956285	1.38159	1.14124	1.14542	0.557996	0.967537	1.12626	1.09856	1.15855	0.816625	0.976931	245.534	11	68.5719	9.26123
D4AAZ6	60S ribosomal protein L37a OS=Rattus norvegicus OX=10116 GN=Rpl37a PE=1 SV=1 - [RL37A_RAT]	4	1	1	1			1.04499				1.19036				0.922665				0.658442				1.01039				1.24391				1.00803				0.759012				0.953133		26.8		8.05724	10.3745
Q5XIM4	ATP synthase subunit s, mitochondrial OS=Rattus norvegicus OX=10116 GN=Atp5s PE=2 SV=1 - [ATP5S_RAT]	1	1	1	7	0.485721		1.03644	1.20837	0.686066		0.790707	0.984014	0.926348		1.03274	1.14418	1.0435		0.948647	1.11633	0.923587		0.623384	0.801024	1.08326		1.15601	1.99757	0.999458		0.980991	0.956746	0.932687		0.914475	0.955168	1.00514		0.919461	1.07485	53.37	4	23.309	8.08936
P08934	Kininogen-1 OS=Rattus norvegicus OX=10116 GN=Kng1 PE=2 SV=1 - [KNG1_RAT]	1	1	7	55	1.70391			1.16644	0.858592			0.587931	0.876538			1.13159	0.612739			0.601996	0.651607			0.638782	0.639876			0.923723	3.1523			1.11148	0.883163			0.919628	1.01443			0.898966	311.461	9	70.8888	6.80029
D4A9L2	RCG34610, isoform CRA_c OS=Rattus norvegicus OX=10116 GN=Srsf1 PE=1 SV=1 - [D4A9L2_RAT]	1	1	3	10		1.19429	0.91555			0.751446	1.19682			0.738023	0.849238			0.895905	1.23886			1.07715	1.03239			0.96961	0.704432			1.31348	0.838264			1.96129	1.38771			0.641223	1.14359		39.05	2	27.7278	10.3599
D4ABI6	Ubiquitin carboxyl-terminal hydrolase OS=Rattus norvegicus OX=10116 GN=Uchl3 PE=1 SV=2 - [D4ABI6_RAT]	2	2	2	5	1.38778	1.14398		1.28446	0.954285	1.03748		0.900905	0.916595	0.770157		1.18772	0.935335	1.00895		1.17246	0.81932	0.974236		1.17735	0.876311	1.28567		1.19352	0.909936	1.39139		1.20157	1.07117	1.42817		0.845503	0.856401	0.794749		1.23639	54.83	2	26.093	5.10986
Q6DGG0	Peptidyl-prolyl cis-trans isomerase D OS=Rattus norvegicus OX=10116 GN=Ppid PE=1 SV=3 - [PPID_RAT]	2	1	3	11		1.31352				0.894501				1.04951				0.859219				1.05345				1.03095				0.947267				1.15598				1.06931			32.05		40.7398	7.1665
G3V786	Aldo-keto reductase family 1, member B8 OS=Rattus norvegicus OX=10116 GN=Akr1b8 PE=1 SV=1 - [G3V786_RAT]	5	1	3	4		0.933497				0.946673				2.51482				0.662404				1.37742				0.65054				0.641593				0.549515				0.83582			38.42		36.1378	7.45947
D3ZT90	Glutaryl-CoA dehydrogenase OS=Rattus norvegicus OX=10116 GN=Gcdh PE=1 SV=1 - [D3ZT90_RAT]	1	2	3	8		0.849558	0.982343	0.68525		0.988166	1.04743	1.35451		1.35069	1.02905	0.739204		1.27732	0.546006	0.874966		1.20453	0.903125	0.795841		1.00463	1.1986	0.882373		0.613808	1	0.939763		0.432531	0.715125	0.976205		1.33743	0.693127	0.901978	82.48	1	49.6815	8.71924
F1LN42	Tensin 1 OS=Rattus norvegicus OX=10116 GN=Tns1 PE=1 SV=2 - [F1LN42_RAT]	1	4	13	31	0.936415	0.997901	1.11298	0.729364	1.09352	1.09417	0.981402	0.893213	1.19871	1.21286	1.09353	1.04798	1.13396	1.07786	1.05198	0.806135	1.16185	1.19288	0.982211	1.13975	1.00231	1.18245	0.911976	0.508539	0.987602	0.829683	0.922911	0.909404	1.09146	1.53356	1.43417	1.12093	1.16692	1.20874	1.26142	0.845152	116.739	5	203.784	7.76709
D4A7U1	Zyxin OS=Rattus norvegicus OX=10116 GN=Zyx PE=1 SV=1 - [D4A7U1_RAT]	1	1	4	10			0.942282				0.91527				0.912031				1.78758				1.07103				0.612657				0.706169				1.45934				1.52146		48.2033	1	60.2648	6.46826
B1PLB1	CD34 antigen (Predicted) OS=Rattus norvegicus OX=10116 GN=Cd34 PE=1 SV=1 - [B1PLB1_RAT]	1	1	3	5	1.2774	1.4489		1.23908	1.23733	1.22261		0.97745	1.07094	1.16915		1.07166	1.10716	2.87813		1.44256	1.00715	0.998192		1.13446	1.22596	1.54721		1.24772	0.9711	1.39806		1.13291	1.13461	1.2624		0.912384	1.1655	1.07653		1.25248	41.07	1	41.2131	5.49072
B2RZ37	Receptor expression-enhancing protein 5 OS=Rattus norvegicus OX=10116 GN=Reep5 PE=1 SV=1 - [REEP5_RAT]	1	2	4	10	0.623834	0.860986		1.05209	1.03448	0.955139		1.0561	1.05219	1.08729		0.866044	0.930139	0.989232		1.48735	0.950838	1.28789		1.628	1.02929	0.924529		1.4581	0.92083	0.945662		0.974049	1.01527	1.19587		1.35864	0.910896	0.906468		1.04152	62.5	4	21.417	8.11865
P04182	Ornithine aminotransferase, mitochondrial OS=Rattus norvegicus OX=10116 GN=Oat PE=1 SV=1 - [OAT_RAT]	1	1	3	7	0.801463	0.779139	1.11989	0.668028	1.04702	0.936117	1.18664	0.992532	1.17146	1.01183	1.21945	0.953305	1.19313	0.844501	0.878739	0.789588	1.1731	1.24439	0.836349	0.943245	1.09663	1.147	1.10898	0.719995	1.00406	0.710332	1.03406	1.2912	1.11117	0.931302	0.995737	0.938827	1.1353	0.96257	1.02496	0.75115	42.15	2	48.302	6.99072
Q66H18	Synaptophysin-like 1 OS=Rattus norvegicus OX=10116 GN=Sypl1 PE=1 SV=1 - [Q66H18_RAT]	2	1	2	3			0.906739				1.07658				1.02687				0.988289				0.831307				1.27651				1.0072				0.852194				0.64944		29.51		28.6096	8.92432
F1M8K0	Dystroglycan 1 OS=Rattus norvegicus OX=10116 GN=Dag1 PE=1 SV=1 - [F1M8K0_RAT]	1	2	7	24	2.36918				1.28523				0.795429				0.704669				0.766548				0.810504				1.19071				1.00929				0.930369				120.377	7	96.6463	8.44092
P61203	COP9 signalosome complex subunit 2 OS=Rattus norvegicus OX=10116 GN=Cops2 PE=1 SV=1 - [CSN2_RAT]	1	1	2	4	1.37224			1.21769	1.32821			1.35191	1.26523			0.813171	0.865864			1.17938	1.3176			0.744671	1.0389			0.668485	0.953227			0.755106	1.26142			1.17052	1.59346			0.955396	67.19	1	51.5641	5.52881
Q5XII9	Mitochondrial fission regulator 1-like OS=Rattus norvegicus OX=10116 GN=Mtfr1l PE=1 SV=1 - [MFR1L_RAT]	1	1	2	6	1.66157	1.23427	1.0246	1.03999	1.1165	1.04837	0.919401	0.825081	0.649293	1.00674	0.762837	1.19817	0.713612	1.05407	1.53699	0.991628	0.520764	1.09285	1.6817	0.973644	0.558824	1.33014	0.642445	0.977374	0.945355	1.24286	0.762732	0.951736	0.773622	1.57307	1.14633	1.09379	0.9594	1.09276	1.33435	1.16642	38.53	1	31.7102	6.1001
D4AAE9	CDGSH iron sulfur domain 2 OS=Rattus norvegicus OX=10116 GN=Cisd2 PE=1 SV=1 - [D4AAE9_RAT]	1	1	1	1																																					41.04		15.2834	9.64209
G3V8A5	Vacuolar protein sorting-associated protein 35 OS=Rattus norvegicus OX=10116 GN=Vps35 PE=1 SV=1 - [G3V8A5_RAT]	1	3	6	17	0.840209	1.06346	1.1381	1.04366	1.11972	1.24077	0.908979	1.39784	1.10624	1.14442	1.15588	0.675996	1.1696	0.939371	0.928314	1.20575	1.40097	1.0371	0.907885	1.38829	1.41411	0.941985	1.20308	1.0273	0.9725	0.938666	1.25183	1.21145	1.30989	0.785808	1.09537	1.03182	1.21136	1.10853	0.976797	1.16648	76.7	4	91.6688	5.43994
D4A9H2	Dermatopontin OS=Rattus norvegicus OX=10116 GN=Dpt PE=1 SV=1 - [D4A9H2_RAT]	2	1	1	2	1.34967				0.958943				0.825736				0.876101				0.812478				0.819205				1.12215				0.879855				1.34678				37.13		19.955	5.14795
P62828	GTP-binding nuclear protein Ran OS=Rattus norvegicus OX=10116 GN=Ran PE=1 SV=3 - [RAN_RAT]	3	2	2	4	1.59982		1.04177		1.24738		0.995916		0.806189		0.958712		0.779198		0.69321		0.810231		0.939766		0.835084		1.09321		0.942932		1.08939		0.907196		0.896385		0.95472		1.08579		46.8086		24.4076	7.48877
Q5XIU9	Membrane-associated progesterone receptor component 2 OS=Rattus norvegicus OX=10116 GN=Pgrmc2 PE=1 SV=1 - [PGRC2_RAT]	1	1	2	8	1.47775	1.49138	0.921174	1.08783	1.25194	1.16843	1.33837	1.12381	1.10958	0.982276	0.949011	0.709567	1.04425	0.940612	1.41056	0.986612	0.999734	0.975041	0.749763	1.1952	1.03961	1.16302	1.15452	0.781514	1.35397	1.32471	1.08902	0.947243	1.19529	0.754902	0.811135	0.909426	1.11907	1.0513	0.989829	1.44415	53.76	3	23.3887	5.26221
A0A0G2K9R5	Apolipoprotein C-I OS=Rattus norvegicus OX=10116 GN=Apoc1 PE=4 SV=1 - [A0A0G2K9R5_RAT]	3	1	1	1		1.43636				0.817559				0.42243				0.784589				0.730924				0.401898				2.07048				1.12676				0.544411			23.65		7.55708	7.25439
Q9EQS0	Transaldolase OS=Rattus norvegicus OX=10116 GN=Taldo1 PE=1 SV=2 - [TALDO_RAT]	1	2	4	16	0.884483		0.9488		1.17723		0.827109		1.1462		1.01864		1.27485		0.76888		1.06611		0.943402		1.18163		0.91267		1.19635		0.891765		1.15434		0.673417		0.93007		0.99936		42.85		37.4365	7.03467
D4A702	Synaptopodin-2 OS=Rattus norvegicus OX=10116 GN=Synpo2 PE=1 SV=2 - [SYNP2_RAT]	1	6	11	45	1.01824	0.942765	0.985359	1.15515	1.05649	0.770361	1.10328	0.776473	0.756037	0.846394	0.863155	1.35047	0.552363	1.05088	1.42716	0.994537	0.727355	1.03588	1.06897	0.927384	0.815013	0.853951	0.759752	1.14378	0.824881	0.936644	0.836891	1.11763	0.873592	1.71047	1.37902	1.10851	0.789263	0.640705	1.15744	1.08645	178.395	8	135.941	8.51416
Q6MGB5	Estradiol 17-beta-dehydrogenase 8 OS=Rattus norvegicus OX=10116 GN=Hsd17b8 PE=1 SV=1 - [DHB8_RAT]	2	1	2	2		1.17266				1.3622				1.52099				1.06133				0.764468				1.20177				0.539272				0.980612				1.23538			35.79		26.7738	6.55127
P80431	Cytochrome c oxidase subunit 7B, mitochondrial OS=Rattus norvegicus OX=10116 GN=Cox7b PE=1 SV=3 - [COX7B_RAT]	1	1	2	9		1.37049	0.962357	1.03385		1.10593	1.09401	0.987617		1.29139	1.13006	1.12708		1.3127	1.04219	0.999224		1.20837	1.22472	0.856823		1.15431	1.26016	1.02837		1.206	1.14912	1.23769		1.29984	1.65465	1.35863		1.10082	0.789366	1.12302	41.67	3	8.98973	10.1108
G3V8R1	Nucleobindin 2, isoform CRA_b OS=Rattus norvegicus OX=10116 GN=Nucb2 PE=1 SV=1 - [G3V8R1_RAT]	2	2	3	3		1.05469	1.04183			0.66148	1.07888			0.624045	0.884385			0.900966	1.21213			1.04524	1.06217			1.18622	0.764147			1.63279	0.702125			1.5766	1.16971			0.678612	1.45783		39.11		50.0862	5.10986
P13383	Nucleolin OS=Rattus norvegicus OX=10116 GN=Ncl PE=1 SV=3 - [NUCL_RAT]	2	2	5	10	1.50772		1.02893		0.933004		1.33337		0.767951		0.914793		0.872828		1.16898		0.857923		0.86221		0.82265		0.896975		0.899543		1.07492		0.98324		1.04302		0.972094		0.889144		55.15	2	77.101	4.7417
P04916	Retinol-binding protein 4 OS=Rattus norvegicus OX=10116 GN=Rbp4 PE=1 SV=1 - [RET4_RAT]	1	1	2	8	1.31761	0.850446	1.11472	1.23103	0.547545	0.765878	1.42747	0.978565	0.397563	0.533423	1.10895	1.82758	0.327403	0.64457	1.63065	0.874879	0.413229	0.874618	1.51002	0.961522	0.391411	0.689426	0.860824	1.18987	0.876873	0.768247	0.652608	1.27365	0.565852	1.79706	2.48552	1.00464	0.656217	0.509371	0.929313	0.828987	79.8167	2	23.2053	5.98584
B0BNM1	NAD(P)H-hydrate epimerase OS=Rattus norvegicus OX=10116 GN=Naxe PE=2 SV=1 - [NNRE_RAT]	1	1	3	13	1.18178	1.22751	0.923564		1.08903	1.05201	1.09464		1.17897	1.16924	0.866607		1.24567	0.999695	1.04293		1.02663	0.964285	0.607248		1.28319	1.19679	1.08398		1.06449	1.19744	1.06037		0.994591	0.622932	1.28294		1.1585	1.09236	0.719897		50	4	30.8707	6.88818
A0A140TAE6	Enoyl-[acyl-carrier-protein] reductase, mitochondrial OS=Rattus norvegicus OX=10116 GN=Mecr PE=1 SV=1 - [A0A140TAE6_RAT]	2	2	3	7	1.21199	1.62126	1.07474		1.06648	0.923223	1.0713		0.941307	1.00255	1.13827		0.886424	0.920153	1.41752		0.758861	0.950907	0.915181		0.767258	1.20585	1.04795		0.99067	1.12222	0.956889		0.903806	0.931206	0.895762		0.919629	0.850462	1.27106		60.2633	2	40.3092	8.77783
P60825	Cold-inducible RNA-binding protein OS=Rattus norvegicus OX=10116 GN=Cirbp PE=2 SV=1 - [CIRBP_RAT]	1	1	2	5		1.2322				0.809726				0.580476				0.735775				0.864039				0.677174				1.09098				1.62809				0.600223			33.06	1	18.5958	9.61279
Q6AXT5	Ras-related protein Rab-21 OS=Rattus norvegicus OX=10116 GN=Rab21 PE=2 SV=1 - [RAB21_RAT]	1	1	2	5		1.49573	1.16699			1.14682	1.20825			1.47202	1.022			1.48955	1.00228			1.18958	1.23252			1.17164	1.32209			1.15947	1.14117			1.15366	0.762092			1.18886	1.0774		40.55	1	24.1482	7.94287
Q7TPB1	T-complex protein 1 subunit delta OS=Rattus norvegicus OX=10116 GN=Cct4 PE=1 SV=3 - [TCPD_RAT]	1	2	5	8	0.761748		0.867516		1.20833		1.08081		1.16761		1.04049		1.36942		0.634968		1.38629		0.931712		1.25685		1.29333		1.04765		1.14627		1.21472		0.711314		1.14753		0.780668		89.44		58.0628	8.01611
Q5RKG9	Eukaryotic translation initiation factor 4B OS=Rattus norvegicus OX=10116 GN=Eif4b PE=1 SV=1 - [Q5RKG9_RAT]	1	1	4	11			0.725299				0.950183				0.745269				1.41524				0.463023				0.786154				0.385246				1.31261				0.974314		42.2233		69.0233	5.80811
P45479	Palmitoyl-protein thioesterase 1 OS=Rattus norvegicus OX=10116 GN=Ppt1 PE=1 SV=1 - [PPT1_RAT]	1	1	2	5		1.10138				0.973531				1.0635				0.877953				1.08391				1.45627				0.917687				0.874113				1.14437			37.0967		34.4324	7.43018
F1LRZ1	Ryanodine receptor 2 OS=Rattus norvegicus OX=10116 GN=Ryr2 PE=1 SV=3 - [F1LRZ1_RAT]	3	15	36	130	0.602179	0.931948	1.11291	0.61136	1.03728	1.4196	1.38253	1.39234	1.36005	1.37614	1.0448	0.47786	1.34883	1.45291	0.393853	0.946215	1.4055	1.3441	0.940619	1.40083	1.26987	0.814039	1.62951	0.63735	1.0161	0.561684	1.38139	0.83514	1.13557	0.647622	1.02943	1.2973	1.19585	1.3173	1.19655	0.90132	502.244	17	560.081	6.12549
B0BN63	Activator of Hsp90 ATPase activity 1 OS=Rattus norvegicus OX=10116 GN=Ahsa1 PE=1 SV=1 - [B0BN63_RAT]	1	2	2	10	0.839853		0.986581	0.910397	0.995863		1.11603	1.51237	1.1121		1.09477	0.731741	1.48051		0.690476	1.01879	1.28552		0.988127	1.40127	1.39275		1.17114	0.797653	1.10146		1.17543	0.715717	1.26963		0.669661	0.910314	1.13718		0.841916	0.878032	85.03	2	38.0802	5.52881
Q561R9	Endoribonuclease LACTB2 OS=Rattus norvegicus OX=10116 GN=Lactb2 PE=2 SV=1 - [LACB2_RAT]	1	1	2	5		0.963063				1.19734				1.19792				0.960184				0.632631				0.988503				0.889932				0.618363				0.860298			49.58	1	32.4637	6.32861
A0A0G2JYA4	Serine/threonine-protein phosphatase OS=Rattus norvegicus OX=10116 GN=LOC100362453 PE=3 SV=1 - [A0A0G2JYA4_RAT]	3	1	3	7		0.969388	0.894322	0.775134		1.08726	1.2146	1.09992		1.49931	1.00033	0.712046		1.17803	0.691438	1.0763		0.976402	0.864062	0.82065		1.01746	1.15145	0.875582		0.97084	1.13632	1.14839		0.663956	0.76408	1.0655		1.11929	0.438437	1.0669	50.16	1	35.5003	5.42725
Q58FK9	Kynurenine--oxoglutarate transaminase 3 OS=Rattus norvegicus OX=10116 GN=Kyat3 PE=2 SV=1 - [KAT3_RAT]	4	4	4	19		1.06062	1.35777			1.36451	0.774465			1.15188	1.22092			1.2215	0.707579			1.50487	1.04929			1.19202	1.47648			0.745112	1.37693			0.83785	0.750003			1.28709	1.13186		85.9367	3	51.0113	8.35303
P63074	Eukaryotic translation initiation factor 4E OS=Rattus norvegicus OX=10116 GN=Eif4e PE=1 SV=1 - [IF4E_RAT]	2	2	2	7			0.942471				1.05208				0.766349				0.876754				0.89732				0.896093				1.00076				0.940983				0.846797		76.3133	1	25.0375	6.15088
G3V8V1	Granulin, isoform CRA_c OS=Rattus norvegicus OX=10116 GN=Grn PE=4 SV=1 - [G3V8V1_RAT]	3	1	3	12	2.5772	1.82655	0.899724	1.91131	0.700569	0.820808	0.953902	0.732236	0.541867	0.564307	1.11971	0.787327	0.426266	1.02179	2.36467	1.00305	0.488341	1.28582	0.946432	0.172145	0.55509	1.1515	0.725275	1.01661	0.651092	1.68833	1.21707	1.63249	0.448373	1.57765	1.89884	0.852061	0.983651	0.69781	0.235311	1.28854	63.4833	4	65.1099	6.72705
Q5XIE6	3-hydroxyisobutyryl-CoA hydrolase, mitochondrial OS=Rattus norvegicus OX=10116 GN=Hibch PE=1 SV=2 - [HIBCH_RAT]	1	1	3	12	0.638298	1.21572	1.22021	0.899292	0.752132	1.72334	1.45291	1.39791	1.70636	1.90381	2.33126	1.28212	1.28731	1.51756	0.69445	1.05333	1.39229	1.35029	0.988833	1.99116	1.13874	1.37998	2.54868	1.07599	1.05767	1.37956	1.77035	1.15015	1.15907	1.00604	0.750124	1.61043	0.984762	1.68042	1.05638	1.23376	65.95	2	42.9973	8.45557
G3V7L0	Adrenodoxin, mitochondrial OS=Rattus norvegicus OX=10116 GN=Fdx1 PE=1 SV=1 - [G3V7L0_RAT]	2	1	2	5		1.25843	0.750966	1.19642		0.882455	0.976223	0.740122		0.727659	0.862061	1.18327		0.906374	1.28727	1.01789		0.999009	0.920712	0.843515		1.21205	0.65188	1.24212		1.37247	0.767554	1.24358		1.85803	0.981198	0.814081		0.763865	1.06773	1.21501	48.85	2	20.136	5.88428
D4AC23	T-complex protein 1 subunit eta OS=Rattus norvegicus OX=10116 GN=Cct7 PE=1 SV=1 - [D4AC23_RAT]	1	1	3	12			1.05719	0.910517			1.17154	1.22547			0.994624	0.694999			0.682182	1.13273			0.899023	0.923552			1.20224	1.08976			1.06454	0.983701			0.821464	1.08483			0.764132	0.991185	147.23	4	59.6202	8.00146
O70593	Small glutamine-rich tetratricopeptide repeat-containing protein alpha OS=Rattus norvegicus OX=10116 GN=Sgta PE=1 SV=1 - [SGTA_RAT]	1	1	2	8			1.9066				1.76966				2.08778				2.51703				1.49101				1.3382				2.42846				2.8938				2.37359		68.2967	2	34.1359	5.12256
P17046	Lysosome-associated membrane glycoprotein 2 OS=Rattus norvegicus OX=10116 GN=Lamp2 PE=1 SV=3 - [LAMP2_RAT]	1	3	3	13	2.41143	1.20482	0.808932	1.36132	1.48105	0.783227	1.13337	0.951166	1.07895	0.632895	0.880789	1.01688	0.573359	0.810878	1.30697	0.827749	1.07925	0.887724	0.557086	1.05925	0.801611	1.00111	0.655754	0.882569	1.93898	1.58004	0.782712	1.15899	0.903265	1.72197	1.00251	0.867481	1.28786	0.77238	0.860992	1.19504	78.54	3	45.1271	7.88428
D3ZIL6	Enoyl CoA hydratase domain-containing 2 OS=Rattus norvegicus OX=10116 GN=Echdc2 PE=1 SV=1 - [D3ZIL6_RAT]	1	1	2	2	1.00037				1.20192				1.03229				1.05314				1.13905				1.03471				0.967099				1.21008				0.957299				31.92		31.7588	9.33447
R9PXR4	Mitochondrial import receptor subunit TOM70 OS=Rattus norvegicus OX=10116 GN=Tomm70 PE=1 SV=1 - [R9PXR4_RAT]	2	2	4	11		1.10781	0.986057			1.00043	1.10758			0.965202	1.08108			1.05969	0.938388			0.961802	1.04782			0.978194	1.09101			1.39616	1.16884			0.913198	0.916714			0.888324	0.818829		75.93	2	61.8991	7.48877
Q9QY17	Protein kinase C and casein kinase substrate in neurons 2 protein OS=Rattus norvegicus OX=10116 GN=Pacsin2 PE=1 SV=2 - [PACN2_RAT]	2	1	5	9	1.06391	0.953849			0.875042	0.715159			0.860578	1.08082			0.998406	0.893621			1.19108	1.03286			1.18228	1.02728			1.30399	1.02468			0.901768	0.996387			0.95871	0.741848			49.3467	2	55.9431	5.13525
A2RRU1	Glycogen [starch] synthase, muscle OS=Rattus norvegicus OX=10116 GN=Gys1 PE=1 SV=1 - [GYS1_RAT]	1	1	5	11	0.588767	0.861712	0.86432	0.612562	0.970829	1.3064	1.07305	1.32874	1.23049	1.52164	1.04812	0.681944	1.45312	1.24955	0.450708	0.929241	1.37874	1.03944	0.868563	1.32982	1.08603	0.965497	1.37867	0.654547	0.956586	0.700868	0.986416	0.818612	1.09431	0.559978	0.648602	0.942436	1.09795	1.36607	0.950401	1.0092	53.2433	2	84.0186	6.17627
D4A1Q2	Microtubule-associated protein OS=Rattus norvegicus OX=10116 GN=Mapt PE=1 SV=1 - [D4A1Q2_RAT]	5	1	4	9	0.94407	0.547656	0.791156	0.922482	1.59386	1.15542	1.23362	0.54821	0.97502	0.902703	1.01165	1.47304	0.70095	1.07248	0.874086	1.25431	0.799467	1.19043	1.09915	0.833836	0.620597	0.740026	0.604998	1.23282	0.776769	1.14996	0.568566	1.16418	0.898338	3.35964	1.05143	1.09304	0.923344	0.753717	1.09013	0.819249	44.07	2	71.7219	5.73193
Q6AY30	Saccharopine dehydrogenase-like oxidoreductase OS=Rattus norvegicus OX=10116 GN=Sccpdh PE=1 SV=1 - [SCPDL_RAT]	1	1	4	4	0.631923				0.990084				1.24612				1.18615				1.38254				1.32069				1.05868				1.08688				1.13217				55.54		47.0581	8.83643
F1M5C9	Ubiquitin-conjugating enzyme E2 D2 OS=Rattus norvegicus OX=10116 GN=Ube2d2 PE=1 SV=1 - [F1M5C9_RAT]	6	1	1	4	1.13747			0.766019	1.09024			1.27635	1.02028			0.68641	1.10162			0.855985	1.1885			0.815328	1.01456			0.743248	1.09946			0.776711	1.143			0.976108	0.973114			1.03702	58.54	2	13.5939	8.29443
D4AAT4	RCG48672 OS=Rattus norvegicus OX=10116 GN=Snrpf PE=1 SV=1 - [D4AAT4_RAT]	1	1	1	2		1.15489		1.27242		0.830576		0.949138		0.86379		1.01786		0.964653		1.39924		0.96725		0.859899		0.825345		1.04492		1.3301		1.07012		1.15703		0.944035		0.950933		1.13563	44.36	1	9.71878	4.66553
D4AA35	Acetylserotonin O-methyltransferase-like OS=Rattus norvegicus OX=10116 GN=Asmtl PE=1 SV=2 - [D4AA35_RAT]	1	1	2	4		1.06807				1.28995				1.36277				1.15059				1.11749				1.34927				0.940192				1.15623				1.28613			27.64	1	24.2347	5.79541
G3V8D4	Apolipoprotein C-II (Predicted) OS=Rattus norvegicus OX=10116 GN=Apoc2 PE=1 SV=1 - [G3V8D4_RAT]	1	1	1	6		1.04468	0.692364			1.28329	0.950272			0.663499	0.88114			1.00813	0.985979			0.676421	1.23322			0.539653	0.496958			1.88681	0.516637			1.2276	1.37584			0.761166	1.21507		56.49	2	10.6883	4.61475
Q5RK17	Diablo homolog (Drosophila) OS=Rattus norvegicus OX=10116 GN=Diablo PE=1 SV=1 - [Q5RK17_RAT]	1	1	1	2		1.48441				1.47351				0.996817				1.47026				1.37682				1.14069				1.5786				1.01351				1.40998			35.68		26.8896	5.73193
G3V6S2	Cytoplasmic aconitate hydratase OS=Rattus norvegicus OX=10116 GN=Aco1 PE=1 SV=1 - [G3V6S2_RAT]	2	3	7	19		1.20486	1.21336	0.756188		1.21494	0.827336	1.36266		1.62836	1.30217	0.907818		1.20544	0.503981	1.07685		1.21068	1.03117	1.33763		1.00206	1.08498	0.604738		0.799117	1.28448	0.88107		0.833071	1.12322	1.13333		1.30523	1.47957	1.1304	77.16	4	98.1304	7.38623
P68101	Eukaryotic translation initiation factor 2 subunit 1 OS=Rattus norvegicus OX=10116 GN=Eif2s1 PE=1 SV=2 - [IF2A_RAT]	1	1	3	9	0.869175				1.16581				1.02928				1.1016				1.13937				0.982429				1.00663				1.07981				1.06565				80.16		36.0854	5.08447
Q642A4	UPF0598 protein C8orf82 homolog OS=Rattus norvegicus OX=10116 PE=2 SV=1 - [CH082_RAT]	1	2	2	10		0.862383	1.04763	0.758051		1.12048	1.17032	1.28997		1.2006	1.04616	0.741691		1.05	0.860285	0.849246		1.03209	0.901	1.3413		0.901896	1.23285	0.678937		0.78088	0.916565	0.764489		0.544685	0.901288	1.23198		0.890018	1.28784	1.03727	84.3033	1	24.3813	8.5874
A2VD12	Pre-B-cell leukemia transcription factor-interacting protein 1 OS=Rattus norvegicus OX=10116 GN=Pbxip1 PE=1 SV=1 - [PBIP1_RAT]	1	3	6	12		1.11203	0.764441	1.09552		1.05874	1.50225	1.33959		0.889064	0.663304	0.852293		0.91855	1.282	0.943751		0.979135	0.81132	0.811677		1.107	0.748241	0.681248		1.09152	1.09161	1.06728		0.90476	0.953148	1.02494		0.949916	0.439062	1.54365	57.35	2	80.2269	5.41455
Q03346	Mitochondrial-processing peptidase subunit beta OS=Rattus norvegicus OX=10116 GN=Pmpcb PE=1 SV=3 - [MPPB_RAT]	1	1	3	50	0.781578				0.952003				0.976985				1.01988				1.16198				1.111				0.806856				1.01265				0.831041				180.055	13	54.2304	6.69775
Q4KLZ0	Vanin 1 OS=Rattus norvegicus OX=10116 GN=Vnn1 PE=1 SV=1 - [Q4KLZ0_RAT]	1	1	3	11		1.00677	1.14124			1.12359	0.739118			0.98291	1.07026			1.06022	1.30097			1.04741	1.31817			0.960825	0.947289			0.90008	0.963496			0.846015	1.01002			1.03464	1.38112		52.15	4	56.9765	5.5542
Q5XIM9	T-complex protein 1 subunit beta OS=Rattus norvegicus OX=10116 GN=Cct2 PE=1 SV=3 - [TCPB_RAT]	1	2	3	6																																					40.39		57.4221	6.45557
A0A0G2K9L2	Target of myb1-like 2 membrane-trafficking protein OS=Rattus norvegicus OX=10116 GN=Tom1l2 PE=1 SV=1 - [A0A0G2K9L2_RAT]	2	1	2	8	0.947748	1.13846	1.08519	0.954132	0.858408	0.960166	1.13943	1.12893	0.72759	1.11357	0.891942	0.882915	0.854804	1.12802	1.46037	0.799601	0.758689	1.24306	1.04436	1.36736	0.641512	1.14631	1.23181	0.974254	1.06097	1.00616	0.770395	0.978325	0.846761	1.03311	1.12507	1.07972	0.754404	0.972697	1.29807	1.10586	86.82	1	57.911	4.81787
Q4KM62	Palmdelphin OS=Rattus norvegicus OX=10116 GN=Palmd PE=1 SV=1 - [PALMD_RAT]	2	3	4	9		1.21643	1.23652			0.853534	0.756413			0.767911	1.1645			1.23435	0.757734			1.11827	0.8778			0.936351	0.956509			1.37468	1.11846			2.19112	0.92039			0.793039	1.14507		71.46	1	62.3804	5.59229
D3ZKG1	Methylmalonyl CoA mutase OS=Rattus norvegicus OX=10116 GN=Mut PE=1 SV=2 - [D3ZKG1_RAT]	1	3	5	15																																					58.53	3	91.9774	7.72314
Q498E0	Thioredoxin domain-containing protein 12 OS=Rattus norvegicus OX=10116 GN=Txndc12 PE=2 SV=2 - [TXD12_RAT]	1	1	1	1				1.17153								1.27642				0.977643				1.09791				1.17018				1.1742				0.949463				1.2535	34.75	1	19.0065	5.40186
P03889	NADH-ubiquinone oxidoreductase chain 1 OS=Rattus norvegicus OX=10116 GN=Mtnd1 PE=1 SV=3 - [NU1M_RAT]	1	1	2	12	0.603762	0.767517	0.656741	0.494102	1.12284	1.38927	0.984582	1.39943	2.247	1.48196	1.16798	0.488587	1.43629	1.40136	0.362197	1.22557	1.31435	1.10644	1.19929	1.145	1.28548	0.867693	1.25512	0.752559	0.932545	0.995681	1.19589	0.948932	1.10173	0.616373	0.779228	1.28948	1.23779	1.33399	0.430292	0.820084	43.83	2	36.121	6.93213
P40112	Proteasome subunit beta type-3 OS=Rattus norvegicus OX=10116 GN=Psmb3 PE=1 SV=1 - [PSB3_RAT]	1	1	1	1																																					31.16		22.9494	6.55127
G3V852	RCG55135, isoform CRA_b OS=Rattus norvegicus OX=10116 GN=Tln1 PE=1 SV=1 - [G3V852_RAT]	1	6	16	52	0.77893	1.1698	1.33676	0.7278	0.952704	1.38349	1.08167	1.49444	1.14032	1.23723	1.17083	0.555399	1.42189	1.2156	0.593045	1.12792	1.29416	1.11216	1.08467	1.3924	1.19606	0.803763	1.29751	0.767816	1.04875	0.718099	1.33566	1.18375	1.12703	0.485472	0.939617	1.68319	1.29547	1.54355	1.62522	1.13811	409.588	7	269.504	6.20166
Q5XI90	Dynein light chain Tctex-type 3 OS=Rattus norvegicus OX=10116 GN=Dynlt3 PE=1 SV=1 - [Q5XI90_RAT]	1	1	1	1		1.24246				1.16859				1.55531				1.2964				1.31014				1.05435				0.979817				0.80208				1.19742			54.19		12.8892	5.36377
A0JPJ7	Obg-like ATPase 1 OS=Rattus norvegicus OX=10116 GN=Ola1 PE=2 SV=1 - [OLA1_RAT]	1	3	3	22	0.916827	0.967242	1.10102	0.852164	0.930264	1.31839	1.16423	1.35549	1.04247	1.29208	1.06694	0.716675	0.928277	1.00769	0.735988	1.08712	0.742232	0.979238	1.26294	1.15956	0.891108	0.90566	1.28195	0.858436	0.875512	0.693583	1.12817	0.800273	0.639125	0.874787	0.930106	1.09025	0.776197	1.19844	1.13633	1.05154	156.35	7	44.5072	7.76709
Q6AYS7	Aminoacylase-1A OS=Rattus norvegicus OX=10116 GN=Acy1a PE=1 SV=1 - [ACY1A_RAT]	1	1	3	6				0.912706				0.883574				1.03625				0.737021				1.40286				0.973734				0.89967				1.00986				1.08977	49.35	3	45.7751	6.48096
P0C0A1	Vacuolar protein-sorting-associated protein 25 OS=Rattus norvegicus OX=10116 GN=Vps25 PE=1 SV=1 - [VPS25_RAT]	1	1	1	2			1.22971				0.915886				1.22383				1.13502				1.16941				1.15786				1.11693				1.16435				1.25504		32.04	1	20.7485	6.34131
P05508	NADH-ubiquinone oxidoreductase chain 4 OS=Rattus norvegicus OX=10116 GN=Mtnd4 PE=3 SV=3 - [NU4M_RAT]	1	2	2	18	0.905256		0.947252	1.30746	1.89796		0.596425	2.42356	1.74567		1.2271	0.578832	1.10807		1.81886	2.34463	0.73253		0.826136	1.13932	2.40646		1.71271	1.75101	0.873755		2.94946	2.02475	1.64925		2.85137	0.533901	1.71187		0.902036	1.80135	79.42	4	51.7476	9.40771
F1LMC7	Septin-7 OS=Rattus norvegicus OX=10116 GN=Sept7 PE=1 SV=3 - [F1LMC7_RAT]	18	1	3	15																																					51.5287	4	50.5479	8.57275
P54921	Alpha-soluble NSF attachment protein OS=Rattus norvegicus OX=10116 GN=Napa PE=1 SV=2 - [SNAA_RAT]	1	2	2	4		0.866212				1.11774				0.769228				0.616331				0.884744				0.852618				1.02288				1.07397				1.02299			44.52	1	33.1712	5.45264
Q99J82	Integrin-linked protein kinase OS=Rattus norvegicus OX=10116 GN=Ilk PE=2 SV=1 - [ILK_RAT]	1	1	4	5	0.88039				1.11485				1.17836				1.17451				1.25474				1.12941				0.994837				1.06217				1.23194				30.36		51.3399	8.07471
Q9ESH6	Glutaredoxin-1 OS=Rattus norvegicus OX=10116 GN=Glrx PE=3 SV=3 - [GLRX1_RAT]	1	1	1	3			1.24148				0.960971				0.891774				1.10296				1.19748				0.993328				0.852264				1.14213				1.59445		37.88		11.8712	8.6167
G3V6I5	DnaJ heat shock protein family (Hsp40) member A3 OS=Rattus norvegicus OX=10116 GN=Dnaja3 PE=1 SV=2 - [G3V6I5_RAT]	3	2	3	5	0.898275				1.02565				1.12254				1.1796				1.05656				0.92928				0.976067				1.1208				1.02235				59.2233		46.7479	9.56885
R9PXV7	Uncharacterized protein OS=Rattus norvegicus OX=10116 PE=1 SV=1 - [R9PXV7_RAT]	2	1	1	4	1.49132		1.05072	1.25253	1.09362		0.924691	0.788959	0.8094		0.918297	1.21747	0.894026		1.27818	1.01104	0.941705		0.862574	0.916301	0.938521		0.871884	1.02038	1.30288		0.921768	1.11646	1.19334		1.06005	0.834811	0.933236		1.08887	1.15121	42.97	1	24.8724	7.40088
D4ABZ8	Uncharacterized protein OS=Rattus norvegicus OX=10116 PE=4 SV=1 - [D4ABZ8_RAT]	2	1	1	8	1.60663	1.11996	0.826185	1.57722	1.45365	0.946603	0.730096	0.921147	1.12175	0.852244	1.01483	0.838773	1.11596	0.958898	0.998087	1.17667	0.947795	1.03298	1.05906	1.15131	0.930663	1.07715	0.999544	1.47333	1.23918	1.50581	0.897016	1.17906	1.1425	0.99518	0.965889	0.728924	0.862208	0.952625	0.81721	1.32436	57.13	2	19.3632	6.81494
Q9JI92	Syntenin-1 OS=Rattus norvegicus OX=10116 GN=Sdcbp PE=1 SV=1 - [SDCB1_RAT]	1	1	1	3																																					37.75		32.4027	7.48877
P02680	Fibrinogen gamma chain OS=Rattus norvegicus OX=10116 GN=Fgg PE=1 SV=3 - [FIBG_RAT]	1	2	3	8	1.02477		0.97255		1.14507		1.28359		1.09363		0.877569		1.03539		0.544691		1.43789		1.93531		1.65237		1.31873		1.95662		0.654046		1.05753		0.711473		1.49051		0.378462		39.76	2	50.6005	5.96045
D3ZUX7	Acyl-CoA synthetase family member 3 OS=Rattus norvegicus OX=10116 GN=Acsf3 PE=1 SV=1 - [D3ZUX7_RAT]	1	2	2	10	1.01656				1.11766				1.33027				1.61891				1.51986				1.66615				1.17963				1.28601				1.30489				53.13	3	65.2248	8.68994
Q6P9U0	Serine (Or cysteine) peptidase inhibitor, clade B, member 6a OS=Rattus norvegicus OX=10116 GN=Serpinb6a PE=1 SV=1 - [Q6P9U0_RAT]	1	1	3	9		0.999622				1.26139				1.20328				1.42317				1.22839				0.902144				0.70608				0.98402				1.3012			35.66	2	42.9909	6.1001
B1H271	Mitochondrial coenzyme A transporter SLC25A42 OS=Rattus norvegicus OX=10116 GN=Slc25a42 PE=1 SV=1 - [B1H271_RAT]	2	2	2	9	0.990976	0.966112	1.34773	0.754222	1.05984	1.08493	1.35037	0.913426	1.26161	0.978991	1.06537	0.682624	1.54998	0.912195	0.716649	0.978515	1.37873	0.897136	1.07313	1.26133	1.58149	1.08418	1.18998	1.19614	1.11656	1.00471	1.6258	1.09639	1.12422	1.10623	1.13178	1.10858	1.27919	0.897483	1.3752	0.884027	111.92	2	35.1635	9.86182
P07808	Pro-neuropeptide Y OS=Rattus norvegicus OX=10116 GN=Npy PE=1 SV=1 - [NPY_RAT]	1	1	1	3		1.21455				0.879847				0.640983				0.9128				1.27617				0.863655				1.61742				1.2646				0.836087			35.14	1	11.0255	7.13721
P55260	Annexin A4 OS=Rattus norvegicus OX=10116 GN=Anxa4 PE=1 SV=3 - [ANXA4_RAT]	2	1	3	10		1.17089	1.10402				0.820685			1.1015	1.07638			1.13637	0.717301			0.961043	0.857575			0.932679	1.09428			1.14063	0.961266			0.586597	0.580672			1.45456	0.865537		39.02	3	35.826	5.43994
P14562	Lysosome-associated membrane glycoprotein 1 OS=Rattus norvegicus OX=10116 GN=Lamp1 PE=1 SV=1 - [LAMP1_RAT]	2	1	2	13	2.07261	1.41374	0.707179	1.03637	0.931952	0.832339	1.04972	0.900252	0.925154	0.7426	0.755243	0.67652	0.831266	0.879876	1.43576	0.674907	0.85987	0.843187	0.671469	0.728932	0.732742	1.28449	0.857411	0.561011	1.43466	1.42908	0.938049	0.896807	0.944425	1.1751	0.963782	0.650749	0.958385	0.719638	0.632794	1.26963	87.0033	3	43.9412	8.07471
F1LQI1	Hydroxyacyl glutathione hydrolase OS=Rattus norvegicus OX=10116 GN=Hagh PE=1 SV=2 - [F1LQI1_RAT]	2	1	2	9	0.868594	1.05327		0.927674	0.924794	0.864748		1.13116	1.02297	0.955614		1.14586	0.934678	0.88793		0.877043	1.09782	0.892599		0.948819	0.997634	0.810405		0.88063	0.974564	0.778395		0.897756	0.976542	1.32404		1.14291	0.981367	0.856446		1.12855	47.81	4	34.1365	7.94287
D3ZW55	Inosine triphosphate pyrophosphatase OS=Rattus norvegicus OX=10116 GN=Itpa PE=3 SV=1 - [ITPA_RAT]	1	1	1	2			0.861849				0.928492				1.1716				1.32319				0.952574				0.985508				0.961274				1.06709				0.932197		39.5		21.9131	5.65576
P18297	Sepiapterin reductase OS=Rattus norvegicus OX=10116 GN=Spr PE=1 SV=1 - [SPRE_RAT]	1	1	1	1	1.5205				1.22369				0.855284				0.900133				0.967976				1.16305				0.949572				1.22499				1.16417				42.38		28.1105	5.70654
F1M9D6	Signal transducer and activator of transcription OS=Rattus norvegicus OX=10116 GN=Stat1 PE=1 SV=2 - [F1M9D6_RAT]	2	2	5	15		0.763519	1.76153	1.32361		0.938787	0.677498	1.44368		0.481165	1.02001	0.656132		0.728588	1.26862	1.74907		1.09999	1.06904	1.06631		0.913213	1.35021	0.849456		0.689077	1.41101	0.654511		0.652919	0.76764	0.581806		2.0387	1.07308	1.2246	103.43	4	87.1952	5.8208
F2Z3Q8	Importin subunit beta-1 OS=Rattus norvegicus OX=10116 GN=Kpnb1 PE=1 SV=1 - [F2Z3Q8_RAT]	2	3	5	14	0.739807	1.15132	0.965409	1.21868	1.12681	1.10842	1.05521	1.29954	1.16516	1.43838	1.11745	0.722935	1.20973	1.21263	0.797317	1.16376	1.30464	1.07804	0.92197	1.17304	1.12589	1.00214	1.49959	1.27014	1.18516	1.02507	1.31776	1.28031	1.13145	0.699949	1.13557	1.07998	1.22518	1.23246	0.680638	1.15547	69.56	3	97.1221	4.77979
A0A0G2JY66	Carboxylic ester hydrolase OS=Rattus norvegicus OX=10116 GN=Ces1d PE=1 SV=1 - [A0A0G2JY66_RAT]	4	2	3	5	0.484274		1.37392		0.602989		3.27607		1.16893		1.74679		0.972342		1.6238		1.09059		0.983424		0.58578		1.37427		0.58992		1.21738		0.51965		1.61043		0.782006		2.2364		50.65		62.0247	6.41748
Q68FQ0	T-complex protein 1 subunit epsilon OS=Rattus norvegicus OX=10116 GN=Cct5 PE=1 SV=1 - [TCPE_RAT]	1	3	4	14	0.793066	1.00979		1.01759	0.97432	1.11776		1.12498	1.02324	1.11261		1.06376	1.01555	1.03315		1.35524	1.10617	0.933306		0.87427	1.04353	1.14415		1.19062	0.915435	0.908268		0.852489	0.948285	0.769221		0.919124	0.907425	1.0994		1.08319	87.58	4	59.4988	5.71924
Q6P742	Proteolipid protein 2 OS=Rattus norvegicus OX=10116 GN=Plp2 PE=2 SV=1 - [PLP2_RAT]	1	1	1	6	1.08497	1.07325	0.720423		1.11251	1.03943	1.07045		0.913408	1.40794	0.827599		0.826811	0.714142	0.765087		1.09445	0.790812	0.975339		0.880563	1.05807	0.656252		1.08681	1.47714	0.8358		0.935962	1.32644	1.09318		0.920084	1.57943	0.886401		60.66		16.5457	7.1665
G3V843	Prothrombin OS=Rattus norvegicus OX=10116 GN=F2 PE=1 SV=1 - [G3V843_RAT]	3	2	4	11			0.764968				0.858524				1.002				1.18038				1.1837				0.6678				0.668634				1.51479				1.13589		69.31	3	70.3406	6.7124
Q4V7C7	Actin-related protein 3 OS=Rattus norvegicus OX=10116 GN=Actr3 PE=1 SV=1 - [ARP3_RAT]	3	1	2	10	1.02483				1.20513				1.27402				1.31467				1.44728				1.51336				1.28894				1.10217				1.17479				59.16	1	47.327	5.88428
D4ABT9	Sarcospan OS=Rattus norvegicus OX=10116 GN=Sspn PE=4 SV=1 - [D4ABT9_RAT]	1	1	1	3	0.982852	1.68528			1.12886	1.67862			1.3458	2.05767			1.14163	1.4086			1.37058	1.56816			1.33485	1.53225			0.853483	1.21508			1.14586	0.592562			1.17949	1.62693			32.36		23.7271	7.6792
A0A096MJR0	Aspartate-beta-hydroxylase OS=Rattus norvegicus OX=10116 GN=Asph PE=1 SV=1 - [A0A096MJR0_RAT]	4	1	1	1			1.11734				1.23783				1.11746				1.03457				1.22388				1.17934				1.12172				1.42611				1.17952		39.13		15.0296	6.30322
Q6AYD5	Eukaryotic peptide chain release factor GTP-binding subunit ERF3B-like OS=Rattus norvegicus OX=10116 GN=Gspt1 PE=1 SV=1 - [Q6AYD5_RAT]	1	1	2	6			1.29857				1.5132				0.562522				1.22456				0.728545				1.22363				0.891989				0.958462				1.60393		37.74	3	68.7081	5.21143
F1LPH1	Calpastatin OS=Rattus norvegicus OX=10116 GN=Cast PE=1 SV=1 - [F1LPH1_RAT]	4	2	4	16	2.081	0.922797	0.820362		1.08716	0.788127	1.41549		0.97812	0.792032	1.06661		0.669046	0.890741	1.46599		0.77577	1.06274	1.0763		0.731152	1.03413	0.689094		1.25389	1.20845	1.06277		0.892425	1.74733	1.30078		0.999763	0.77674	1.22103		83.15	3	77.2499	5.19873
F8WFR8	Multifunctional protein ADE2-like OS=Rattus norvegicus OX=10116 GN=LOC100910308 PE=3 SV=2 - [F8WFR8_RAT]	3	1	2	8																																					51.37	2	39.9702	6.85889
Q6IMY8	Heterogeneous nuclear ribonucleoprotein U OS=Rattus norvegicus OX=10116 GN=Hnrnpu PE=1 SV=1 - [HNRPU_RAT]	2	2	4	15	0.653471	0.89617	0.813623		1.02749	1.38986	1.16415		0.842551	1.42827	1.17928		1.05419	1.23146	0.680596		1.0134	1.01486	0.805562		1.01317	0.733918	1.17331		0.826925	0.57246	1.16757		0.92051	0.433033	0.630229		0.972207	1.57584	0.447511		125.913	3	87.6776	6.23975
M0RBK9	Paroxysmal nonkinesigenic dyskinesia OS=Rattus norvegicus OX=10116 GN=Pnkd PE=1 SV=1 - [M0RBK9_RAT]	1	1	1	6	0.929532		0.774817		0.918974		0.729402		0.870871		0.900382		0.740392		1.14748		0.949134		0.697181		0.812084		0.927967		1.01645		0.989778		0.815824		1.12568		0.863964		1.07743		52.36	1	15.5881	10.272
F2Z3T7	Isochorismatase domain-containing protein 1 OS=Rattus norvegicus OX=10116 GN=LOC103694869 PE=1 SV=1 - [F2Z3T7_RAT]	1	1	1	6	0.816621		0.877431		0.975675		1.16852		1.45557		1.00771		1.34025		0.917343		1.183		1.1859		1.44835		1.49417		1.11916		1.15048		0.969631		1.04096		1.24489		1.098		46.12	1	32.012	7.38623
Q5I0M3	Complement component factor h-like 1 OS=Rattus norvegicus OX=10116 GN=Cfhr1 PE=1 SV=1 - [Q5I0M3_RAT]	2	1	2	4			1.17144				0.950275				1.22915				1.92231				1.87593				0.692972				0.73779				1.70317				0.502376		47.93		30.6009	7.63525
Q6AXW1	Glutaredoxin-2, mitochondrial OS=Rattus norvegicus OX=10116 GN=Glrx2 PE=2 SV=2 - [GLRX2_RAT]	1	1	1	2		1.01506	1.10784			1.09386	0.891352			0.843899	0.845468			1.10469	1.13616			0.852283	1.03071			0.87764	1.13168			0.977883	0.791564			0.964814	1.43285			0.956905	0.631556		32.41		17.2637	9.65674
R9PXU4	Thioredoxin reductase 1, cytoplasmic OS=Rattus norvegicus OX=10116 GN=Txnrd1 PE=3 SV=2 - [R9PXU4_RAT]	3	1	2	2																																					43.96	1	54.4717	6.46826
F1M7L9	Uncharacterized protein OS=Rattus norvegicus OX=10116 PE=1 SV=3 - [F1M7L9_RAT]	1	4	6	22	0.870215	0.866177	1.1703	0.871104	1.12177	1.15287	0.772902	1.00391	0.93605	1.1555	0.863455	1.00412	1.01346	1.14915	0.999532	0.885914	1.03734	0.988844	1.48175	0.991298	1.0055	0.783225	0.777736	0.993671	0.927988	0.573794	0.820064	0.875414	1.04201	0.617738	1.15154	1.03749	1.13601	1.14237	1.29052	0.942104	119.983	4	88.5411	9.02686
D4AAT7	ATP-dependent (S)-NAD(P)H-hydrate dehydratase OS=Rattus norvegicus OX=10116 GN=Naxd PE=3 SV=1 - [NNRD_RAT]	2	1	1	4		1.03898	1.22769			0.993776	1.0285			1.10553	1.03424			0.870409	1.20631			1.11199	1.3191			1.12929	0.968989			0.757915	0.976297			1.13988	1.25566			1.00357	1.64357		51.57	1	36.4949	7.51807
M0RDK9	Acyl-CoA dehydrogenase family, member 8 OS=Rattus norvegicus OX=10116 GN=Acad8 PE=1 SV=2 - [M0RDK9_RAT]	1	3	4	15	0.873697		0.985744	0.458221	1.02854		1.14982	1.33304	1.1498		1.0604	0.659112	1.19314		0.594639	0.884123	1.19817		0.984861	1.2383	1.12973		1.24905	0.525567	0.855598		1.06772	0.640936	1.03815		0.698471	1.1473	1.1705		0.996362	0.855023	92.53	4	45.1264	8.07471
A0A0G2KAT4	Spliceosome RNA helicase Ddx39b OS=Rattus norvegicus OX=10116 GN=Ddx39b PE=1 SV=1 - [A0A0G2KAT4_RAT]	3	2	2	4	1.01973	0.984845			1.22271	1.04506			1.42301	0.947989			1.42528	0.958925			1.39662	0.695429			1.37283	1.37393			0.996735	1.29663			1.07763	1.1423			1.20357	0.488591			79.74		45.6503	6.94678
P46844	Biliverdin reductase A OS=Rattus norvegicus OX=10116 GN=Blvra PE=1 SV=1 - [BIEA_RAT]	2	1	2	2	0.567564				0.984064				1.39072				1.05051				1.28732				1.2889				1.16918				1.23422				1.08171				35.72		33.5445	6.12549
A0A0G2JYY8	Uncharacterized protein OS=Rattus norvegicus OX=10116 PE=1 SV=1 - [A0A0G2JYY8_RAT]	1	1	2	24	0.503201	0.980433	0.927492		0.651336	0.761347	0.85229		0.77435	0.976292	0.775064		0.697603	0.782349	1.35279		0.943934	0.873459	0.570267		1.07477	0.895817	0.80492		0.791678	1.35263	0.802299		0.642406	1.0624	1.4604		0.92768	0.664663	1.13608		261.09	3	35.8328	6.62451
M0R9L0	Nascent polypeptide-associated complex subunit alpha OS=Rattus norvegicus OX=10116 GN=Naca PE=1 SV=1 - [M0R9L0_RAT]	2	8	13	38	1.21157	1.00154	1.06372	1.05328	1.00735	1.00736	0.967359	0.937602	0.88636	0.916281	1.14371	1.26077	0.888993	0.934766	1.21512	1.00948	0.980688	1.07792	1.08963	1.19228	0.79888	0.891809	0.873429	1.05464	0.97505	1.05881	1.01652	0.969299	0.94044	1.58914	1.50552	0.927832	1.0647	0.91533	1.32677	0.98076	145.155	8	220.062	9.31982
Q5XIJ4	Protein FAM210A OS=Rattus norvegicus OX=10116 GN=Fam210a PE=2 SV=1 - [F210A_RAT]	1	1	2	16	0.775067	0.840474	0.779576	0.802937	1.11741	1.14376	1.0974	0.95915	1.2172	1.2226	1.21752	0.881224	1.05354	1.0467	0.748669	1.14328	0.939421	0.938251	0.892757	0.933982	1.08598	0.995598	1.27738	1.13904	0.904255	0.785382	1.1438	0.996338	1.01565	0.745949	0.824134	0.998223	0.85428	1.04504	0.748479	0.819393	96.87	4	31.4546	9.81787
P14480	Fibrinogen beta chain OS=Rattus norvegicus OX=10116 GN=Fgb PE=1 SV=4 - [FIBB_RAT]	2	1	3	8																																					41.6567		54.2007	7.78174
Q9QX69	LanC-like protein 1 OS=Rattus norvegicus OX=10116 GN=Lancl1 PE=1 SV=2 - [LANC1_RAT]	1	1	2	3		1.39229				1.30492				1.44352				0.998908				1.24792				1.42252				1.03337				0.999494				1.38107			75.84		45.2105	7.6499
P19945	60S acidic ribosomal protein P0 OS=Rattus norvegicus OX=10116 GN=Rplp0 PE=1 SV=2 - [RLA0_RAT]	1	2	2	14		1.02953	1.03082	0.79532		1.25487	1.05026	1.24188		1.32983	1.10869	0.732214		1.11662	0.598224	1.15276		1.22609	0.909267	1.36741		0.966975	1.1718	0.828356		0.723607	1.07915	0.945962		0.685261	0.884343	1.01915		1.26457	0.769013	0.977477	98.07	3	34.1938	6.25244
D3ZX69	39S ribosomal protein L10, mitochondrial OS=Rattus norvegicus OX=10116 GN=Mrpl10 PE=1 SV=1 - [D3ZX69_RAT]	2	1	1	9	1.44761	0.927745	1.32648	0.972211	1.09989	0.994042	0.580987	1.05361	0.829276	0.994691	0.681582	1.12484	0.852947	0.805696	0.65956	1.37921	1.07195	0.791585	0.792164	1.30913	1.10722	0.730882	1.01111	1.11207	0.82462	0.819566	0.972306	1.06628	1.08584	0.632228	1.14596	0.923021	0.906899	0.947619	1.8694	1.03061	65.2533	2	29.4469	9.74463
A0A0G2K757	Dolichyl-diphosphooligosaccharide--protein glycosyltransferase subunit 2 OS=Rattus norvegicus OX=10116 GN=Rpn2 PE=1 SV=1 - [A0A0G2K757_RAT]	2	1	2	3		0.748758				0.853009				0.905272				0.926243				1.01393				0.718088				0.634826				0.564556				1.03517			31.9		69.08	5.87158
A0A0G2JXB1	Galectin OS=Rattus norvegicus OX=10116 GN=Lgals3 PE=1 SV=1 - [A0A0G2JXB1_RAT]	3	1	2	2	1.68337				0.936125				1.00861				1.01848				0.945216				0.799353				1.26257				0.823418				1.26764				45.13		26.319	8.57275
A0A096MJ04	Glutathione S-transferase omega 1, isoform CRA_a OS=Rattus norvegicus OX=10116 GN=Gsto1 PE=1 SV=1 - [A0A096MJ04_RAT]	3	1	1	2			0.846386	1.13722			1.24408	1.21703			1.06722	0.826965			0.918149	1.3469			1.23302	0.790319			1.32047	1.10189			1.17584	0.778134			1.05582	0.872517			0.686546	0.987015	47.37	1	24.9276	6.40479
G3V6A9	Microfibril-associated protein 4 OS=Rattus norvegicus OX=10116 GN=Mfap4 PE=1 SV=2 - [G3V6A9_RAT]	2	1	1	12	0.724907	0.963125	0.827267	0.463984	0.762722	1.04143	1.8867	0.994719	1.53331	1.42977	0.875907	0.787513	1.90501	1.1909	0.538451	0.64637	1.5581	1.34267	0.591766	1.16219	1.32409	1.05766	1.01106	0.534708	1.01532	0.422223	1.07068	0.775682	1.11995	0.473032	0.915867	1.13219	1.92866	2.38352	1.02207	0.685793	213.553	2	28.7869	5.2876
F1LTJ5	Uncharacterized protein OS=Rattus norvegicus OX=10116 PE=1 SV=3 - [F1LTJ5_RAT]	1	5	12	23	0.799959	1.40602	1.07166		1.07257	1.10954	1.11552		1.16764	1.23138	1.2445		1.1311	0.855839	0.816631		1.18999	0.988478	0.897616		1.10947	0.990469	0.989286		1.06309	1.33155	1.03927		1.23785	1.45891	0.992032		1.24105	1.00057	0.661135		133.291	4	262.948	5.98584
D4A650	Peptide-methionine (R)-S-oxide reductase OS=Rattus norvegicus OX=10116 GN=Msrb3 PE=1 SV=3 - [D4A650_RAT]	1	1	2	2																																					34.45		29.0143	8.19189
P30713	Glutathione S-transferase theta-2 OS=Rattus norvegicus OX=10116 GN=Gstt2 PE=1 SV=3 - [GSTT2_RAT]	3	1	2	7	0.747113			0.857105	1.12169			1.03364	1.06217			0.736161	1.08075			1.28735	1.15662			0.905803	1.34687			1.12	1.0445			0.942638	0.854122			0.976246	0.995077			0.854442	46.86	3	27.4215	7.91357
D3ZZC1	RCG43947 OS=Rattus norvegicus OX=10116 GN=Txndc5 PE=1 SV=1 - [D3ZZC1_RAT]	1	1	2	3																																					66.1333		46.324	5.88428
P70584	Short/branched chain specific acyl-CoA dehydrogenase, mitochondrial OS=Rattus norvegicus OX=10116 GN=Acadsb PE=1 SV=1 - [ACDSB_RAT]	2	1	2	6	1.34677	1.14519			0.736986	1.40741			0.954333	1.77604			1.27759	0.896187			1.48827	0.583923			1.58969	0.892924			1.07292	0.665939			1.12259	0.964043			1.07262	0.790479			63.17		47.7933	8.06006
Q9QYL8	Acyl-protein thioesterase 2 OS=Rattus norvegicus OX=10116 GN=Lypla2 PE=1 SV=1 - [LYPA2_RAT]	1	1	2	56	0.956763		1.06497		0.951802		1.13831		0.920062		0.971129		1.11957		0.986672		1.04021		1.05194		0.94171		0.993891		0.92609		0.855244		0.935984		1.05768		0.992987		0.929557		47.3867	15	24.7907	7.2251
G3V7P1	Syntaxin-12 OS=Rattus norvegicus OX=10116 GN=Stx12 PE=1 SV=1 - [STX12_RAT]	3	1	2	2	1.43737				1.23797				0.961901				0.821402				0.964004				0.827325				1.41417				1.08163				1.00745				36.44		31.1679	5.32568
Q5M9G3	Caprin-1 OS=Rattus norvegicus OX=10116 GN=Caprin1 PE=1 SV=2 - [CAPR1_RAT]	2	1	3	14	1.61623	1.17892	0.901272	0.947919	1.29882	0.754957	1.08438	0.850136	0.788921	0.870456	1.02403	1.15066	0.720967	0.784568	1.8187	0.760363	0.692942	1.0824	0.608162	1.10529	1.22732	0.831472	0.883801	0.915261		1.58119	0.511695	1.29178	1.12979	1.4169	0.905697	1.02398	0.999143	0.890861	1.65289	0.941142	53.23	2	78.0729	5.24951
D3ZT71	BCL2-like 13 OS=Rattus norvegicus OX=10116 GN=Bcl2l13 PE=1 SV=3 - [D3ZT71_RAT]	1	2	3	12	0.78724	0.97096	1.00565		0.978041	1.08494	0.953738		1.22276	1.33406	1.16399		1.0718	1.07085	0.975433		1.08797	0.926764	1.81965		0.990193	1.13582	1.28631		1.00854	0.710187	1.06853		1.02701	0.497932	0.817972		1.03734	1.23095	1.10588		51.2667	3	46.7054	4.52588
Q5XI21	Target of myb1 homolog (Chicken) OS=Rattus norvegicus OX=10116 GN=Tom1 PE=1 SV=1 - [Q5XI21_RAT]	1	3	3	3	1.37032		0.871476		1.17245		1.07624		1.1621		1.04798		1.08996		1.26571		1.12975		0.907113		1.01759		0.764303		1.2682		0.969878		1.05358		1.10218		1.22684		1.175		56.12		54.0552	4.95752
Q8R560	Ankyrin repeat domain-containing protein 1 OS=Rattus norvegicus OX=10116 GN=Ankrd1 PE=1 SV=1 - [ANKR1_RAT]	1	1	1	2			1.2582				0.95725				0.929675				0.803274				1.03263				1.32222				0.94899				0.976069				1.08406		28.35	1	36.041	8.35303
P62250	40S ribosomal protein S16 OS=Rattus norvegicus OX=10116 GN=Rps16 PE=1 SV=2 - [RS16_RAT]	3	1	1	1			1.15411				1.70279				1.28508				1.46378				1.27408				1.44112				1.12513				0.938386				1.51169		31.75		16.435	10.2134
A0A0G2JUP3	Obscurin, cytoskeletal calmodulin and titin-interacting RhoGEF OS=Rattus norvegicus OX=10116 GN=Obscn PE=1 SV=1 - [A0A0G2JUP3_RAT]	3	2	6	15	0.63606	0.710891	0.898493		1.04078	1.60973	1.72716		1.44464	1.72205	1.21669		1.31009	1.51625	0.231411		1.50016	1.18621	0.839854		1.41032	0.739665	1.48061		0.779368	0.289209	1.46208		1.10051	0.23661	0.928071		1.24693	1.58444	0.637551		57.76		814.946	5.85889
M0R9Q1	RCG48334, isoform CRA_e OS=Rattus norvegicus OX=10116 GN=Rbm14 PE=1 SV=1 - [M0R9Q1_RAT]	2	1	3	7		0.430891	1.32347	0.945864			1.53208	1.2035		0.845653	0.638551	1.84724			1.25293	1.27096			1.12882			0.80909		0.789764		1.36478		1.12827		1.47446	1.18849	1.39066		0.551411	1.2555		66.24	2	69.4509	9.67139
Q66HG9	Mitochondrial antiviral-signaling protein OS=Rattus norvegicus OX=10116 GN=Mavs PE=1 SV=1 - [MAVS_RAT]	1	1	2	3	1.59251				1.45334				0.938531				1.39487				1.25209				1.03346				1.10751				1.60044				1.1935				60.69		53.7712	6.45557
A0A0G2K189	Secernin 3 OS=Rattus norvegicus OX=10116 GN=Scrn3 PE=1 SV=1 - [A0A0G2K189_RAT]	2	1	2	10	0.932955		1.05546	0.961534	0.912235		0.694597	0.888557	0.849963		0.901394	0.899876	0.842388		0.827072	0.684799	0.780961		0.769088	0.892152	0.87509		1.04196	0.867209	0.752248		0.851483	0.911445	0.961035		0.860927	0.932651	0.871778		0.887025	0.906032	60.61	3	47.739	6.06201
Q4FZY0	EF-hand domain-containing protein D2 OS=Rattus norvegicus OX=10116 GN=Efhd2 PE=1 SV=1 - [EFHD2_RAT]	1	1	1	1			1.16734				1.27784				1.08917				1.12247				1.30183				1.50886				1.32991				1.0143				1.36086		30		26.7425	5.07178
P12711	Alcohol dehydrogenase class-3 OS=Rattus norvegicus OX=10116 GN=Adh5 PE=1 SV=2 - [ADHX_RAT]	2	1	2	10			1.04925	0.745441			1.07221	1.04997			0.74889	0.879761			1.21098	0.865505			0.89116	0.7153			1.42752	0.787094			1.24808	0.881809			1.52607	1.04189			1.39209	0.753111	53.8	2	39.5502	7.48877
A0A0G2JW88	Microtubule-associated protein OS=Rattus norvegicus OX=10116 GN=Map4 PE=1 SV=1 - [A0A0G2JW88_RAT]	2	3	11	25	0.585517	1.09186	0.906091	1.00042	1.11452	1.03536	1.02517	0.920573	1.04672	1.06042	1.36961	1.25298	1.20653	0.958144	0.933856	0.895889	0.951352	1.0438	1.15525	1.14106	0.825329	0.873084	0.953655	1.23393	1.00485	0.980072	0.852064	0.981505	0.814666	1.50449	1.05265	1.15333	0.960261	1.07031	1.08213	1.02796	91.88	4	233.25	5.61768
Q5FWY5	AH receptor-interacting protein OS=Rattus norvegicus OX=10116 GN=Aip PE=1 SV=1 - [AIP_RAT]	1	1	2	4																																					37.71	3	37.5752	6.53662
A0A0H2UHR7	Filamin-C OS=Rattus norvegicus OX=10116 GN=Flnc PE=1 SV=1 - [A0A0H2UHR7_RAT]	2	8	15	53	0.66315	0.95836	0.952972	0.69205	1.0123	1.09364	1.02565	1.12461	1.32382	1.33559	1.04449	0.861555	1.38452	1.2051	0.553329	1.16043	1.39433	1.16024	0.935649	1.98029	1.44407	0.766248	1.31606	0.627625	1.00236	0.62999	1.02289	0.915183	0.976491	0.67726	0.784705	1.19112	1.39787	1.20844	0.886246	0.778944	208.359	12	287.122	5.90967
Q5XHX3	ENAH, actin regulator OS=Rattus norvegicus OX=10116 GN=Enah PE=1 SV=1 - [Q5XHX3_RAT]	2	1	2	3		1.13981		0.951101		0.986299		0.852846		0.8593		1.07773		1.15103		0.999208		1.25313		1.36179		0.810504		0.968323		1.138		1.24516		1.87833		1.02171		1.0179		0.99493	41.31	1	58.792	8.00146
D3ZAQ0	FUN14 domain-containing 2 OS=Rattus norvegicus OX=10116 GN=Fundc2 PE=1 SV=1 - [D3ZAQ0_RAT]	1	1	1	7	0.99006	1.47468	1.22172	0.661256	0.849104	1.79378	0.690666	1.37764	0.746931	1.49515	1.15017	1.21715	0.682881	0.695255	0.821588	1.36155	0.755853	1.12961	0.867954	0.879495	0.729985	1.44337	1.72621	1.63024	1.10962	0.585603	0.845434	1.00042	0.698575	0.86061	0.762447	1.17398	1.08237	0.743142	1.043	1.05339	66.84	2	16.3337	10.0522
D4A6C5	Rho GTPase-activating protein 1 OS=Rattus norvegicus OX=10116 GN=Arhgap1 PE=1 SV=1 - [D4A6C5_RAT]	1	1	2	6				0.649098				1.17129				0.614528				1.04218				1.21956				0.796587				0.866438				0.984251				0.963148	61.52	2	50.5912	6.53662
Q9ER30	Kelch-like protein 41 OS=Rattus norvegicus OX=10116 GN=Klhl41 PE=1 SV=1 - [KLH41_RAT]	1	3	3	14		0.881163	1.13175			1.20302	1.54184			1.31409	1.06553			1.17435	0.704239			1.06261	1.10089			0.966363	1.29948			0.650303	1.3241			0.497242	0.908073			1.25342	0.60803		104.02	3	68.1697	5.17334
Q5XID6	Sarcoglycan, gamma OS=Rattus norvegicus OX=10116 GN=Sgcg PE=2 SV=1 - [Q5XID6_RAT]	1	1	1	2		0.828501				0.950669				0.904124				0.819966				0.947341				1.04839				0.908048				1.04234				0.832455			40.06		32.1595	5.90967
Q6AXM6	Intercellular adhesion molecule 2 OS=Rattus norvegicus OX=10116 GN=Icam2 PE=1 SV=1 - [Q6AXM6_RAT]	1	1	1	6		0.988927	1.00001	1.06783		1.02626	1.04037	1.39972		0.958854	1.02355	0.473883		1.12492	1.79113	1.0216		0.884097	0.931861	0.565675		1.13306	1.28102	0.620477		0.940031	1.06959	0.85355		0.873867	0.796644	0.962364		1.10011	0.431073	1.20651	40.93	2	31.0711	7.82568
P35053	Glypican-1 OS=Rattus norvegicus OX=10116 GN=Gpc1 PE=1 SV=1 - [GPC1_RAT]	2	2	3	13	2.54164	1.38049	0.842094	1.26888	1.86486	0.744836	1.00898	0.9114	0.939495	1.01071	0.930782	0.682057	0.760525	0.845921	1.68357	1.01894	0.862278	1.04169	0.98731	0.834623	0.828983	1.06653	0.964033	0.799683	1.19143	1.33709	0.93549	1.11163	0.960541	0.818191	1	0.923754	0.818913	0.962092	0.855041	1.37849	87.2	3	61.6949	7.21045
Q5PQN5	Tripartite motif-containing protein 55 OS=Rattus norvegicus OX=10116 GN=Trim55 PE=1 SV=1 - [TRI55_RAT]	3	1	3	5				1.02485				1.1602				1.09192				1.1497				1.3028				0.581818				1.03703				0.998156				1.32933	29.35	1	59.942	4.65283
M0RBZ7	SH3 domain-containing kinase-binding protein 1 OS=Rattus norvegicus OX=10116 GN=Sh3kbp1 PE=1 SV=2 - [M0RBZ7_RAT]	3	2	4	20	1.55094	1.0821	0.993243	1.37675	1.09917	0.640062	0.799284	0.607519	0.640493	0.538741	1.10575	1.42276	0.461296	0.799357	1.5325	1.06391	0.510023	0.952379	1.07038	0.761405	0.623617	1.02847	0.780229	1.67322	1.03402	1.82609	0.8623	1.38267	0.80127	2.10523	1.76321	0.855635	0.791495	0.595943	1.37099	1.24737	146.893	7	71.8083	8.70459
Q6MG12	Uncharacterized protein C6orf136 homolog OS=Rattus norvegicus OX=10116 PE=2 SV=1 - [CF136_RAT]	2	1	1	1	0.957199				1.26561				1.02084				1.17183				1.07311				0.964719				1.05903				1.09962				0.89044				28.98		20.4316	8.90967
G3V6S3	Calumenin OS=Rattus norvegicus OX=10116 GN=Calu PE=1 SV=1 - [G3V6S3_RAT]	3	1	2	9			0.791014				1.19401				0.935333				1.54581				0.916404				0.765759				0.884364				1.40916				1.06077		30.72	3	37.0405	4.66553
F1LM84	Nidogen-1 OS=Rattus norvegicus OX=10116 GN=Nid1 PE=1 SV=1 - [F1LM84_RAT]	2	3	4	12	1.32462	1.15457		1.03854	0.748669	1.09698		0.974628	0.559122	0.872458		1.29229	0.507488	1.04362		0.890022	0.54443	0.965195		0.573798	0.663488	1.13791		0.884113	1.09109	0.85612		0.935908	0.751127	1.25649		1.29383	0.891635	0.937816		0.899843	104.363	6	136.952	5.46533
D4A8N2	Ferredoxin 1-like OS=Rattus norvegicus OX=10116 GN=Fdx2 PE=1 SV=1 - [D4A8N2_RAT]	1	1	1	1				1.33513				1.04033				1.44277				1.30915				1.21736				1.50918				1.39063				1.16885				1.37002	36.93	1	18.7584	5.98584
A0A0G2JW34	CDGSH iron sulfur domain 3 OS=Rattus norvegicus OX=10116 GN=Cisd3 PE=1 SV=1 - [A0A0G2JW34_RAT]	1	1	1	1	0.879675				0.971451				0.920875				1.13575				1.1522				1.11725				0.73859				0.960697				1.10313				43.14		14.3694	9.87646
Q3T1K5	F-actin-capping protein subunit alpha-2 OS=Rattus norvegicus OX=10116 GN=Capza2 PE=1 SV=1 - [CAZA2_RAT]	1	1	1	5	1.4004				0.910638				1.00712				1.13993				0.815856				1.08807				1.0666				0.915776				0.885243				46.74	1	32.9466	5.84619
P19357	Solute carrier family 2, facilitated glucose transporter member 4 OS=Rattus norvegicus OX=10116 GN=Slc2a4 PE=1 SV=1 - [GLUT4_RAT]	1	2	2	6	0.61492				0.998395				1.65155				1.32336				1.36602				1.30926				1.10755				1.08408				1.19661				102.13		54.8604	7.29834
Q5U2U2	Crk-like protein OS=Rattus norvegicus OX=10116 GN=Crkl PE=1 SV=1 - [CRKL_RAT]	1	1	1	2			1.16024				1.06908				0.906825				1.5649				0.902833				0.91161				1.13611				1.49936				1.32468		31.05	1	33.844	6.7417
Q62829	Serine/threonine-protein kinase PAK 3 OS=Rattus norvegicus OX=10116 GN=Pak3 PE=1 SV=1 - [PAK3_RAT]	2	2	3	10	1.29731	1.15129	1.21507	1.01867	0.902652	0.9871	1.1046	1.1226	0.79257	1.01034	1.00218	1.00916	0.928081	0.953592	1.14722	0.90673	0.921392	0.965839	0.891715	1.15984	1.09345	1.09602	1.0971	0.904324	1.21771	1.03487	1.02758	0.799323	1.06728	1.13646	1.03995	1.09211	1.01401	0.990118	1.12418	1.10279	60.51	2	60.6727	5.51611
D3ZDK7	Glycerol-3-phosphate phosphatase OS=Rattus norvegicus OX=10116 GN=Pgp PE=1 SV=1 - [PGP_RAT]	1	1	2	3			0.845937				1.10546				1.07889				0.650808				1.10839				1.22286				1.0505				0.819362				1.03306		33.72		34.5787	5.35107
Q642E6	Tripeptidyl peptidase I OS=Rattus norvegicus OX=10116 GN=Tpp1 PE=1 SV=1 - [Q642E6_RAT]	2	1	2	9			0.816791	1.04333			1.71347	0.832135			1.13375	0.817075			1.28246	0.762383			0.772387	0.894669			1.00345	0.543609			1.32086	1.03065			1.66416	0.641369			1.15423	1.05885	53.88	2	61.2748	6.63916
G3V7L8	ATPase, H+ transporting, V1 subunit E isoform 1, isoform CRA_a OS=Rattus norvegicus OX=10116 GN=Atp6v1e1 PE=1 SV=1 - [G3V7L8_RAT]	2	1	1	4		1.11566				0.78351				0.650896				0.611023				0.623378				1.15462				1.69044				0.926389				0.7581			29.06	1	26.1268	8.42627
D3ZVH2	Uncharacterized protein OS=Rattus norvegicus OX=10116 PE=3 SV=1 - [D3ZVH2_RAT]	3	1	2	2		0.835733				1.07043				1.30731				1.21879				1.09936				0.801653				0.914992				0.625666				1.21308			35.64		26.6133	9.23193
A0A0G2K466	Oxidoreductase NAD-binding domain containing 1 (Predicted), isoform CRA_a OS=Rattus norvegicus OX=10116 GN=Oxnad1 PE=1 SV=1 - [A0A0G2K466_RAT]	2	1	1	3	1.34793	1.48195			1.164	0.898983			1.01128	1.71139			1.02409	1.07811			0.88662	0.812365			1.05331	1.32056			0.95827	0.73514			1.10949	1.33378			1.12948	1.1975			84.76		34.8251	8.51416
D3ZH27	Bis(5'-nucleosyl)-tetraphosphatase [asymmetrical]-like OS=Rattus norvegicus OX=10116 GN=LOC100910067 PE=4 SV=2 - [D3ZH27_RAT]	2	1	1	4	1.1171			1.08047	1.04134			1.16321	0.944845			0.90947	0.980098			1.27559	1.0153			0.998452	0.912324			1.31737	0.996764			1.07558	1.12056			0.842147	0.862125			1.10388	34.94	1	16.9777	6.52197
D3ZSR2	Polyadenylate-binding protein OS=Rattus norvegicus OX=10116 PE=3 SV=3 - [D3ZSR2_RAT]	2	1	3	4				0.715108				1.14125				1.00235				0.932364				1.35605				0.778668				0.736182				0.901056				0.852206	47.35	1	70.7601	9.33447
P32362	Uroporphyrinogen decarboxylase (Fragment) OS=Rattus norvegicus OX=10116 GN=Urod PE=1 SV=1 - [DCUP_RAT]	2	1	1	1	1.58753				1.10728				0.860839				0.807129				0.843798				1.14485				0.920404				1.11712				0.989367				36.34		40.4268	6.80029
Q62667	Major vault protein OS=Rattus norvegicus OX=10116 GN=Mvp PE=1 SV=4 - [MVP_RAT]	2	2	3	7		0.798502	1.24466	0.542261		1.30897	0.883099	1.31183		0.970195	0.989265	0.557349		0.950358	1.00063	1.17655		1.08642	0.959347	1.69062		0.940136	1.04965	0.810849		0.583396	0.945155	0.726063		0.564561	0.859733	0.997057		1.31202	0.917814	0.907462	53.7876	2	95.7391	5.57959
P35899	Olfactory receptor 1571 (Fragment) OS=Rattus norvegicus OX=10116 GN=Olr1571 PE=2 SV=2 - [O1571_RAT]	1	1	2	3				0.941164				1.32147				0.560874				2.14874				1.16772				0.6647				1.04491				1.67366				1.92796	36.21	1	27.6923	8.95361
D3ZNQ6	Ubiquitin-conjugating enzyme E2M OS=Rattus norvegicus OX=10116 GN=Ube2m PE=1 SV=1 - [D3ZNQ6_RAT]	1	1	1	1			1.11447				1.28656				1.16374				1.36306				0.977894				1.06075				1.19754				1.61155				0.56249		37.11		20.8866	7.69385
Q99P39	Cysteine desulfurase, mitochondrial OS=Rattus norvegicus OX=10116 GN=Nfs1 PE=2 SV=1 - [NFS1_RAT]	2	1	2	6																																					34.73		49.9809	8.71924
D4ABS5	PITH domain-containing 1 OS=Rattus norvegicus OX=10116 GN=Pithd1 PE=1 SV=2 - [D4ABS5_RAT]	1	1	1	6		0.78438	1.01811	0.719483		1.15522	1.17697	1.34679		1.45646	1.1405	0.626856		1.13066	0.546378	1.05464		1.08836	0.95618	1.27997		0.830123	1.22028	1.02558		0.938802	1.0581	0.980476		0.587246	0.768905	1.20544		1.23964	1.01792	0.993732	27.444	2	13.7396	5.69385
D4ACB8	Chaperonin subunit 8 (Theta) (Predicted), isoform CRA_a OS=Rattus norvegicus OX=10116 GN=Cct8 PE=1 SV=1 - [D4ACB8_RAT]	1	2	3	4	0.773044	0.976967			1.2201	1.10468			1.28947	1.1719			1.25908	1.06794			1.32686	1.21913			1.29218	0.973245			1.06178	0.863002			1.19293	0.728523			1.13828	1.1215			55.38		59.5505	5.5415
P48284	Carbonic anhydrase 4 OS=Rattus norvegicus OX=10116 GN=Ca4 PE=1 SV=1 - [CAH4_RAT]	2	1	1	2		1.25449				1.12873				1.1451				0.921725				1.14457				0.967668				1.15322				1.28751				0.796013			42.54		35.0537	6.80029
Q5XHZ0	Heat shock protein 75 kDa, mitochondrial OS=Rattus norvegicus OX=10116 GN=Trap1 PE=1 SV=1 - [TRAP1_RAT]	1	1	3	21																																					85.5671	5	80.4108	7.03467
A0A0G2K1N3	Porphobilinogen deaminase OS=Rattus norvegicus OX=10116 GN=Hmbs PE=1 SV=1 - [A0A0G2K1N3_RAT]	3	1	1	2	1.13035				1.29342				0.960654				1.07355				0.707497				0.758933				0.946749				0.833678				0.961787				66.96		37.771	7.15186
D3ZZ68	Synaptopodin 2-like OS=Rattus norvegicus OX=10116 GN=Synpo2l PE=1 SV=1 - [D3ZZ68_RAT]	1	2	4	13	0.993673		1.15223	1.03718	1.27508		1.39622	0.637906	0.955369		0.846615	1.2682	0.995395		1.50982	0.887436	0.908313		1.00053	1.06377	0.79276		0.692593	0.973042	1.2402		0.808653	0.845883	1.10696		1.66514	1.00923	1.10625		1.33682	1.24977	53.7433	2	102.998	9.72998
D3ZBM3	Ferrochelatase OS=Rattus norvegicus OX=10116 GN=Fech PE=1 SV=1 - [D3ZBM3_RAT]	1	1	1	2		0.893012								1.25662				0.703408								1.55165								0.867803				1.17712			33.49	1	47.5213	8.71924
P20070	NADH-cytochrome b5 reductase 3 OS=Rattus norvegicus OX=10116 GN=Cyb5r3 PE=1 SV=2 - [NB5R3_RAT]	1	1	1	6			1.05704				1.16239				1.0624				0.61598				0.785607				1.35554				1.0305				1.00926				0.965984		43.63	1	34.1527	8.38232
D3ZBS2	Inter-alpha-trypsin inhibitor heavy chain H3 OS=Rattus norvegicus OX=10116 GN=Itih3 PE=1 SV=3 - [D3ZBS2_RAT]	3	2	3	5	1.25731	1.04022			0.679816	1.56514			1.39004	1.14197			1.26405	1.34295			1.32802	1.3088			1.24541	0.952298			1.78856	1.21649			1.13463	1.24909			2.07596	1.34397			83.85		99.0057	6.31592
B5DFL0	Snta1 protein OS=Rattus norvegicus OX=10116 GN=Snta1 PE=1 SV=1 - [B5DFL0_RAT]	1	1	3	6	0.764373				1.10086				1.21945				1.33083				1.65143				1.52923				1.00244				1.36549				1.3879				46.8033	1	53.3295	6.80029
Q6MG60	N(G),N(G)-dimethylarginine dimethylaminohydrolase 2 OS=Rattus norvegicus OX=10116 GN=Ddah2 PE=1 SV=1 - [DDAH2_RAT]	1	1	2	4		1.09744				0.988298				1.0409				0.971386				0.932037				1.3187				1.05037				1.41416				0.722923			63.31	1	29.6694	6.01123
P51635	Alcohol dehydrogenase [NADP(+)] OS=Rattus norvegicus OX=10116 GN=Akr1a1 PE=1 SV=2 - [AK1A1_RAT]	1	1	2	6		1.06643				0.867595				0.907445				0.912718				0.822361				0.93584				0.904063				0.764703				1.10759			39.81		36.4829	7.31299
A0A0H2UHS3	Coiled-coil domain-containing protein 51 OS=Rattus norvegicus OX=10116 GN=Ccdc51 PE=1 SV=1 - [A0A0H2UHS3_RAT]	3	1	1	6	1.54596	0.891564	1.02658	1.07643	1.5596	1.15992	1.33888	0.719672	0.902914	0.769464	1.04628	1.10136	0.790416	1.1961	1.20135	0.638421	0.751506	1.10704	0.888716	1.2111	0.902286	1.50644	1.12098	1.14559	0.829881	1.0831	0.803583	1.13487	1.11637	1.00531	1.16012	0.810317	0.816014	0.695068	1.382	1.06563	58.24	2	42.2818	7.53271
D4A9W3	D-glutamate cyclase OS=Rattus norvegicus OX=10116 GN=Dglucy PE=1 SV=1 - [D4A9W3_RAT]	1	2	4	10	0.835025	0.974931	1.12714		1.21314	1.36503	1.09775		1.21129	1.23694	1.082		1.28654	1.31758	0.737568		0.874284	0.987579	0.67408		0.991263	1.08155	1.40954		0.911797	0.593248	1.20222		1.23008	0.664235	0.563867		1.15586	1.02234	1.11821		45.37		66.0141	6.68311
P40307	Proteasome subunit beta type-2 OS=Rattus norvegicus OX=10116 GN=Psmb2 PE=1 SV=1 - [PSB2_RAT]	1	1	1	2	0.716991				1.04061				1.30681				1.22533				1.37341				0.783044				1.19726				1.11198				1.04586				36.99		22.8977	7.44482
D3ZVR9	Phosphoglucomutase 5 OS=Rattus norvegicus OX=10116 GN=Pgm5 PE=1 SV=3 - [D3ZVR9_RAT]	1	3	3	4	0.83509	0.967352	0.767377		1.10008	1.14045	1.15745		1.35317	1.14045	0.868111		1.46855	1.17558	0.671216		1.47999	1.23419	1.04067		1.60213	0.903942	1.1035		1.16695	0.645794	1.05021		1.35274	0.577924	0.928675		1.41854	1.36141	0.889875		60.43		62.1648	7.82568
F1LMM9	Elongation factor G, mitochondrial OS=Rattus norvegicus OX=10116 GN=Gfm1 PE=1 SV=2 - [F1LMM9_RAT]	2	2	4	20		0.859224	1.31415			1.21488	0.947238			1.35071	1.23515			0.979296	0.492566			1.01796	1.01589			0.83423	1.40719			0.57363	1.26472			0.687853	0.998548			1.18165	1.40184		79.52	3	83.4016	7.03467
D3ZJE2	Uncharacterized protein OS=Rattus norvegicus OX=10116 PE=3 SV=1 - [D3ZJE2_RAT]	4	1	1	7	0.846195	0.940938	1.03879	0.757839	1.08506	1.19117	1.00563	1.09753	0.997632	1.25917	0.957327	0.77444	1.25824	1.06816	0.577549	1.19212	1.16588	1.03338	0.974474	1.29145	1.11022	0.926494	1.07272	1.01554	0.9102	0.822216	1.08607	0.872143	0.982396	0.740575	0.692287	0.9729	1.0006	1.17571	1.02615	0.922675	36.67	2	17.8354	9.26123
O88637	Ethanolamine-phosphate cytidylyltransferase OS=Rattus norvegicus OX=10116 GN=Pcyt2 PE=1 SV=1 - [PCY2_RAT]	1	1	1	1																																					36.42		45.1915	6.66846
P07154	Cathepsin L1 OS=Rattus norvegicus OX=10116 GN=Ctsl PE=1 SV=2 - [CATL1_RAT]	1	1	1	2			1.053				1.30112				1.03283				1.55604				1.18337				0.858286				1.48222				1.61946				1.3602		30.69		37.636	6.82959
F1LRV4	Heat shock 70 kDa protein 4 OS=Rattus norvegicus OX=10116 GN=Hspa4 PE=1 SV=1 - [F1LRV4_RAT]	4	3	5	8	1.06603		1.18809		1.28776		1.65796		1.19527		1.22635		1.45795		0.635374		1.35133		1.00835		1.3645		1.30275		1.27681		1.27726		1.09837		0.925747		1.27092		0.672987		45.6375		93.9671	5.21143
D3ZUF9	Pitrilysin metallepetidase 1 (Predicted) OS=Rattus norvegicus OX=10116 GN=Pitrm1 PE=1 SV=1 - [D3ZUF9_RAT]	2	1	4	15	1.12624	1.14452	2.00172	0.669789	0.829468	1.20894	1.87526	0.895686	0.995598	1.36737	2.35628	0.577409	1.2434	1.05831	1.583	0.737051	1.2618	1.22285	1.15807	1.23757	0.946376	1.00743	1.39844	0.631006	1.04303	0.824047	1.26753	0.813325	0.976763	0.784047	1.68256	0.876141	1.10433	1.2525	4.06154	0.812595	87.21	6	108.475	7.32764
Q5I0G4	Glycine--tRNA ligase (Fragment) OS=Rattus norvegicus OX=10116 GN=Gars PE=1 SV=1 - [GARS_RAT]	2	2	2	11	0.689635	0.953643	1.03731		1.04318	1.33763	1.12113		1.47084	1.45234	1.12867		1.49319	1.06985	0.612201		1.57642	1.18322	0.834166		1.55227	0.944733	1.36059		1.04983	0.535795	1.14286		1.30297	0.485849	0.824038		1.15225	1.28062	0.880538		71.72	2	71.9843	6.07471
D4AEH3	Proteasome (Prosome, macropain) 26S subunit, non-ATPase, 7 (Predicted) OS=Rattus norvegicus OX=10116 GN=Psmd7 PE=1 SV=1 - [D4AEH3_RAT]	1	1	1	4	1.61521				1.32958				0.547667				1.3784				0.931711				1.34303				1.05435				1.12892				1.03505				34.52	1	36.4692	6.81494
A0A0G2JUS0	Protein quaking-like OS=Rattus norvegicus OX=10116 GN=LOC108348175 PE=4 SV=1 - [A0A0G2JUS0_RAT]	5	1	2	3		1.01736				0.646147				0.794333				0.895126				1.19391				0.846007				1.50745				1.8979				0.729557			34.92		35.7956	6.12549
G3V7G6	Heat shock 27kDa protein 3 OS=Rattus norvegicus OX=10116 GN=Hspb3 PE=3 SV=1 - [G3V7G6_RAT]	2	1	1	5				1.02361				0.923679				1.07563				1.06535				0.935696				1.06761				1.07727				1.07793				1.23392	44.34	1	17.1269	5.40186
Q4G064	2-methoxy-6-polyprenyl-1,4-benzoquinol methylase, mitochondrial OS=Rattus norvegicus OX=10116 GN=Coq5 PE=2 SV=1 - [COQ5_RAT]	1	1	2	14		0.895844	1.19528			0.888109	1.06503			1.22102	1.31304			1.08071	0.671669			0.927302	1.2003			0.935168	1.32391			0.914995	1.21709			0.718625	0.765185			0.956545	0.878427		62.39	3	37.2771	8.80713
Q5XIA8	Growth hormone-inducible transmembrane protein OS=Rattus norvegicus OX=10116 GN=Ghitm PE=2 SV=1 - [GHITM_RAT]	1	1	2	7	0.65812	1.0066		0.829253	1.19282	1.13887		0.975081	1.31746	1.31239		0.846605	1.19672	1.22561		1.07219	1.09401	0.971846		1.00293	1.10499	1.08955		1.16987	0.991087	1.18536		0.987165	1.14042	0.763007		0.787357	1.01165	1.25277		1.00504	63.88	2	37.1534	9.78857
Q5U1Y3	Filamin-binding LIM protein 1 OS=Rattus norvegicus OX=10116 GN=Fblim1 PE=2 SV=1 - [Q5U1Y3_RAT]	2	2	2	7		1.35778	0.994016	0.915859		1.1634	1.07957	1.08846		1.04568	1.08691	1.06694		1.19314	1.33024	1.09531		1.294	0.940853	1.08507		1.21058	0.862094	1.04165		1.17508	1.04229	1.13535		1.55667	1.05774	1.03531		1.31553	1.14442	1.19044	47.63	2	38.2029	6.1001
D3ZWL0	Uncharacterized protein OS=Rattus norvegicus OX=10116 PE=4 SV=1 - [D3ZWL0_RAT]	2	1	1	1	0.64135				0.964155				1.11859				1.30413				1.46904				1.23647				1.03405				0.976886				1.1081				27.37		15.7928	10.9312
Q06645	ATP synthase F(0) complex subunit C1, mitochondrial OS=Rattus norvegicus OX=10116 GN=Atp5mc1 PE=1 SV=1 - [AT5G1_RAT]	5	1	1	11	0.477366	0.752524	0.90099	0.54671	0.880109	1.29239	1.39447	1.34221	1.42226	1.28841	1.3506	0.726646	1.1933	1.36221	0.465648	0.90817	1.46313	0.886405	1.13661	1.33588	1.37833	1.01738	1.71326	0.655552	0.981687	0.325527	1.36851	0.918513	1.16812	0.479787	0.562113	1.30687	1.17167	1.0775	1.12137	1.07249	54.4	1	14.2346	9.90576
Q6P7A7	Dolichyl-diphosphooligosaccharide--protein glycosyltransferase subunit 1 OS=Rattus norvegicus OX=10116 GN=Rpn1 PE=1 SV=1 - [Q6P7A7_RAT]	2	2	3	11		0.995193	1.19708			1.37726	1.639			1.38461	1.08216			1.20795	0.666545			1.11126	1.16574			1.0139	1.93656			0.69673	1.46343			0.671173	0.875176			1.34883	0.71945		55.96		68.3586	6.50732
Q5XIK2	Thioredoxin-related transmembrane protein 2 OS=Rattus norvegicus OX=10116 GN=Tmx2 PE=2 SV=1 - [TMX2_RAT]	1	1	1	1																																					39.9		33.8436	8.86572
P27867	Sorbitol dehydrogenase OS=Rattus norvegicus OX=10116 GN=Sord PE=1 SV=4 - [DHSO_RAT]	1	1	1	8	0.87988	1.09965	1.07042		1.27608	1.35424	1.18828		1.09253	1.55349	1.29909		1.36362	1.15422	0.863602		1.4893	1.08179	1.24866		1.42259	1.07215	1.28417		1.06151	0.754698	1.32932		1.17194	1.23209	1.06702		1.2688	1.49609	0.812804		79.22	1	38.2098	7.44482
Q6AYR6	Haloacid dehalogenase-like hydrolase domain-containing protein 2 OS=Rattus norvegicus OX=10116 GN=Hdhd2 PE=2 SV=1 - [HDHD2_RAT]	2	1	1	5	0.913159	1.23864	1.11967	0.892142	0.994333	0.963299	1.2582	0.981719	0.913752	0.815006	0.975714	0.993311	1.16223	0.884374	0.986494	0.714132	0.850963	0.871194	1.09609	1.5464	0.88491	0.978864	0.942938	1.41384	1.36661	1.35477	1.31849	0.775637	0.665091	0.665792	0.748672	0.86134	1.18976	1.03605	1.13388	1.2549	74.56	1	28.7611	5.99854
P52873	Pyruvate carboxylase, mitochondrial OS=Rattus norvegicus OX=10116 GN=Pc PE=1 SV=2 - [PYC_RAT]	2	3	4	18	1.24908	0.884072	1.30399	0.710709	1.46594	0.925578	1.23957	1.61407	1.22096	1.20311	1.17458	0.975194	1.12192	0.978422	0.839793	1.04333	1.34062	1.13215	1.09466	1.54897	1.19454	0.778672	1.2891	0.802286	0.888448	0.575346	1.18908	0.858849	1.21939	0.565628	1.34214	1.18588	1.27427	1.144	1.79931	1.1069	90.5	3	129.695	6.81494
A0A0G2K1W9	Lactate dehydrogenase D OS=Rattus norvegicus OX=10116 GN=Ldhd PE=1 SV=1 - [A0A0G2K1W9_RAT]	2	1	2	2	0.839187				1.3232				1.17934				1.14578				0.91043				0.838979				0.951049				0.682566				0.894463				33.24		51.8103	7.10791
Q6PEC4	S-phase kinase-associated protein 1 OS=Rattus norvegicus OX=10116 GN=Skp1 PE=1 SV=3 - [SKP1_RAT]	2	1	1	8	1.23083	1.24377		1.21205	1.02408	0.816759		0.983015	0.82163	0.822503		1.04891	0.82522	0.812717		1.00092	0.851785	0.93461		0.685026	0.930074	1.17346		0.932663	1.01339	1.38164		1.07538	1.02374	1.2635		0.846664	0.939199	0.823084		1.05392	41.61	2	18.6603	4.53857
D3ZUL3	Collagen type VI alpha 1 chain OS=Rattus norvegicus OX=10116 GN=Col6a1 PE=1 SV=1 - [D3ZUL3_RAT]	1	2	4	13	0.627487	0.892115	1.33466		0.745039	0.857667	1.06735		1.09082	1.32301	0.922675		1.60646	1.11217	0.525493		2.15776	1.04511	0.888456		1.43951	1.19574	1.17912		1.09774	0.635183	1.13216		1.08174	0.689972	0.788839		1.63302	1.29837	1.17124		76.7	2	108.738	5.36377
A0A0G2K5P8	Glutaredoxin-3 OS=Rattus norvegicus OX=10116 GN=Glrx3 PE=1 SV=1 - [A0A0G2K5P8_RAT]	2	1	1	4	1.0043	1.18105	1.08607	1.16751	0.976615	0.868702	0.978156	1.09646	1.0936	0.956225	1.03943	1.15474	1.21708	1.01822	1.32428	1.11638	1.04999	0.883094	0.773618	1.16016	1.07822	0.953202	0.972005	0.989647	1.06925	1.13145	0.931086	1.14833	0.976023	0.894238	0.930128	0.77616	1.04933	1.03139	1.04445	0.934101	45.21	1	32.4956	5.69385
B0BNC9	Quinone oxidoreductase-like protein 2 OS=Rattus norvegicus OX=10116 PE=2 SV=1 - [QORL2_RAT]	1	1	1	2				0.870986				1.19639				1.07904				1.17997				1.3291				1.11978				0.937404				1.05419				0.983823	28.22	1	37.5244	8.68994
Q63258	Integrin alpha-7 OS=Rattus norvegicus OX=10116 GN=Itga7 PE=1 SV=2 - [ITA7_RAT]	2	2	4	10		0.967413	0.938337	0.982378		1.19293	0.963073	1.1268		0.952767	0.861087	1.05909		1.04019	1.17059	1.59627		0.905435	0.790443	1.10607		1.66016	1.07638	1.46292		1.1461	0.940888	1.13392		0.926299	1.02716	0.930555		0.988689	1.16198	1.09786	49.13	2	124.117	6.03662
A0A2H2GPM9	Paraplegin OS=Rattus norvegicus OX=10116 GN=Spg7 PE=1 SV=1 - [A0A2H2GPM9_RAT]	2	1	2	3			1.33638				0.870184				1.25939				1.05105				1.23893				1.44698				1.08756				1.21994				1.57473		52.4533		82.071	9.11475
Q4FZT8	SPRY domain-containing protein 4 OS=Rattus norvegicus OX=10116 GN=Spryd4 PE=2 SV=1 - [SPRY4_RAT]	1	1	1	1	1.09858				1.05039				1.1081				1.09849				0.961076				1.12938				1.27639				1.28073				1.0711				32.21		23.2351	9.34912
A0A0G2K2T1	Taxilin beta OS=Rattus norvegicus OX=10116 GN=Txlnb PE=1 SV=1 - [A0A0G2K2T1_RAT]	1	2	2	5	1.61957		0.975288	0.862485	1.32011		1.00585	0.912677	0.865749		0.866489	1.09653	0.893674		1.33221	1.19587	0.99847		1.21087	0.719298	0.992604		0.70431	0.722106	1.20325		0.662339	0.845594	1.17319		1.16723	0.842981	0.939058		1.10288	0.978011	62.31	2	76.9092	5.09717
A0A0U1RRR6	Aminoacyl tRNA synthase complex-interacting multifunctional protein 2 (Fragment) OS=Rattus norvegicus OX=10116 GN=Aimp2 PE=1 SV=1 - [A0A0U1RRR6_RAT]	2	1	1	3	0.803697				1.0159				1.21636				1.36402				1.2433				1.18411				1.13629				1.03205				1.07935				40.71		21.0469	7.50342
Q9WVJ6	Tissue-type transglutaminase OS=Rattus norvegicus OX=10116 GN=Tgm2 PE=1 SV=1 - [Q9WVJ6_RAT]	1	1	3	7		0.762181	1.78217			2.07474	0.575862			0.653347	0.909506			1.12423	0.635199			1.61972	0.632374			0.650644	2.44199			0.422694	0.961032			0.461765	0.501321			0.860481	1.05832		50.01	2	76.8861	5.09717
F1LV13	Heterogeneous nuclear ribonucleoprotein M OS=Rattus norvegicus OX=10116 GN=Hnrnpm PE=1 SV=1 - [F1LV13_RAT]	3	2	2	2	0.923189			0.901577	0.977928			1.03561	1.09914			1.10327	1.06225			0.903903	0.860957			1.40382	1.18445			0.920106	0.968215			0.964479	1.05244			1.21015	0.959871			0.952036	56.19	1	73.6734	8.74854
A0A0G2K9P4	Endophilin-B2 OS=Rattus norvegicus OX=10116 GN=Sh3glb2 PE=1 SV=1 - [A0A0G2K9P4_RAT]	3	1	2	7		1.24793				0.790916				0.721245				0.804704				0.7278				0.834205				1.391				1.02321				0.59946			54.24	2	44.4207	5.8208
B1WC26	N-acetylneuraminate synthase OS=Rattus norvegicus OX=10116 GN=Nans PE=1 SV=1 - [B1WC26_RAT]	1	1	1	3		1.30698				1.34142				0.934779				1.0003				0.859443				1.48308				1.06228				1.22056				1.24651			55.26		40.0254	6.84424
A0A0G2JZ60	Fibronectin type III and SPRY domain-containing 1-like OS=Rattus norvegicus OX=10116 GN=Fsd1l PE=4 SV=1 - [A0A0G2JZ60_RAT]	1	1	1	1			0.894036				1.1452				0.975021				1.08589				1.01878				1.07551				1.03933				0.914922				1.23658		29.99		57.0786	6.90283
Q86YZ3	SWISS-PROT:Q86YZ3 Tax_Id=9606 Gene_Symbol=HRNR Hornerin	1	3	3	4	0.494782			0.574666	1.09921			18.2202	0.680863			1.40961	0.611218			6.72656	0.312127			0.73193	0.471063			1.8135	2.97928			0.731552	0.424015			0.898767	0.487485			0.667515	42.16	2	282.228	10.0376
D4ABC2	DnaJ heat shock protein family (Hsp40) member B2 OS=Rattus norvegicus OX=10116 GN=Dnajb2 PE=1 SV=1 - [D4ABC2_RAT]	2	1	1	1	2.18435				1.2272				0.659557				0.740098				0.665954				0.706399				1.21951				0.95271				0.836481				38.62		28.6448	4.75439
A0A0G2JWD2	Fragile X mental retardation syndrome-related protein 1 OS=Rattus norvegicus OX=10116 GN=Fxr1 PE=1 SV=1 - [A0A0G2JWD2_RAT]	2	1	2	3			0.919499				0.94066				0.98462				0.9024				1.01313				1.11373				0.986781				1.04022				0.749328		33.97		63.3506	6.39209
P28077	Proteasome subunit beta type-9 OS=Rattus norvegicus OX=10116 GN=Psmb9 PE=1 SV=2 - [PSB9_RAT]	2	1	1	2	1.36836				0.334683				0.744904				0.847211				1.16427				0.962269				0.382934				0.383106				0.807852				54.39		23.3096	5.0083
A0A0G2K3V2	Aflatoxin B1 aldehyde reductase member 2 OS=Rattus norvegicus OX=10116 GN=Akr7a2 PE=1 SV=1 - [A0A0G2K3V2_RAT]	3	1	1	8		1.21624				1.40116				1.31936				1.19616				1.27065				1.15589				0.771074				0.763315				1.30806			80.21	1	37.5026	6.72705
Q5U1Z2	Trafficking protein particle complex subunit 3 OS=Rattus norvegicus OX=10116 GN=Trappc3 PE=2 SV=1 - [TPPC3_RAT]	1	1	1	3		1.41616		1.21642		1.14745		1.12399		1.23258		0.84703		1.05343		1.24545		1.09907		1.23803		1.4723		1.1485		1.41168		0.950594		0.685495		0.844347		1.02095		1.1266	34.75	1	20.2892	4.95752
D4A2G9	RAN-binding protein 1 OS=Rattus norvegicus OX=10116 GN=Ranbp1 PE=1 SV=1 - [D4A2G9_RAT]	1	1	1	5	1.78153	0.995713	1.0748	1.35132	0.941534	0.576004	0.960151	0.636418	0.610496	0.596124	1.0698	1.41047	0.52366	0.705672	1.79548	1.01521	0.555016	0.888719	1.20557	0.742794	0.630335	0.882914	0.724935	1.68055	1.05994	1.53552	0.849806	1.29521	0.718738	1.58972	1.89391	0.780173	0.778995	0.565128	1.53889	1.12174	45.12	1	23.5817	5.22412
P40241	CD9 antigen OS=Rattus norvegicus OX=10116 GN=Cd9 PE=1 SV=2 - [CD9_RAT]	1	1	1	3			0.80126				1.24916				0.871998				0.906038				1.00931				0.80167				0.992692				1.22674				0.716763		46.72		25.1979	7.26904
A0A0G2JVV5	Ubiquitin-specific peptidase 14 OS=Rattus norvegicus OX=10116 GN=Usp14 PE=1 SV=1 - [A0A0G2JVV5_RAT]	2	2	2	5	0.999137				1.07067				1.21992				1.29848				1.41181				1.17369				1.17785				1.29162				1.0994				63.6218		52.2602	5.5542
G3V7Q3	Coiled-coil domain-containing protein 127 OS=Rattus norvegicus OX=10116 GN=Ccdc127 PE=1 SV=2 - [G3V7Q3_RAT]	2	1	1	1		1.20922				1.04759				1.19266				1.03061				1.02946				1.17461				1.08725				0.847972				1.09986			39.77		29.5703	8.89502
P16296	Coagulation factor IX OS=Rattus norvegicus OX=10116 GN=F9 PE=2 SV=2 - [FA9_RAT]	1	2	2	8	1.70332	1.15144	1.03242		0.768152	0.976444	0.899153		0.723243	0.828095	0.745936		0.905595	1.00889	1.70081		0.84744	1.00795	0.894574		0.977875	1.01951	0.989409		1.01873	1.11356	0.907003		0.790524	1.0718	1.01559		0.951492	1.0065	1.2114		60.24	2	51.7753	5.30029
D3ZLA3	Copine 3 OS=Rattus norvegicus OX=10116 GN=Cpne3 PE=1 SV=1 - [D3ZLA3_RAT]	1	1	2	8		1.07384	1.06455			0.939877	1.25522			1.12062	1.08949			1.10345	1.13231			1.14618	1.0653			0.885797	1.2443			0.744521	1.16935			0.717146	1.0463			0.982498	1.4738		41.97	2	59.648	5.68115
Q64240	Protein AMBP OS=Rattus norvegicus OX=10116 GN=Ambp PE=1 SV=1 - [AMBP_RAT]	1	1	1	2	1.7694				1.01591				1.06787				1.12343				1.04884				0.917545				1.69475				0.947966				1.55782				46.54		38.826	5.99854
F7EWC1	Vasodilator-stimulated phosphoprotein OS=Rattus norvegicus OX=10116 GN=Vasp PE=1 SV=2 - [F7EWC1_RAT]	2	1	1	1				1.40245				1.06343				1.41975				1.2731				0.984485				1.28943				1.23391				1.27129				1.28157	34.76	1	39.461	8.67529
Q9WVH8	Fibulin-5 OS=Rattus norvegicus OX=10116 GN=Fbln5 PE=2 SV=1 - [FBLN5_RAT]	1	2	2	13		1.0478				0.903398				0.845406				1.02096				0.907722				1.20554				0.997524				1.18742				1.51869			45.1867		50.1267	4.66553
A0A0G2JSL0	Proteasome subunit beta type OS=Rattus norvegicus OX=10116 GN=LOC100360846 PE=3 SV=1 - [A0A0G2JSL0_RAT]	2	1	1	5	1.36471		0.208298		2.11014		2.20752		0.844549		0.636973		0.848437		0.353244		0.568153		0.726852		0.418455		0.351732		1.8003		0.520034		1.98188		1.71332		1.04942		1.66813		47.21	1	25.2875	4.99561
M0R5Y9	Zinc finger and BTB domain-containing 8 opposite strand OS=Rattus norvegicus OX=10116 GN=Zbtb8os PE=1 SV=1 - [M0R5Y9_RAT]	1	1	1	1																																					0		19.5785	4.53857
Q3KR94	Vitronectin OS=Rattus norvegicus OX=10116 GN=Vtn PE=1 SV=1 - [Q3KR94_RAT]	2	2	2	8		0.884585				0.986193				0.753079				0.611377				0.776442				0.738989				0.688727				0.736841				0.70171			50.5333	3	54.6902	6.04932
A0A0G2K896	Similar to RIKEN cDNA 1300017J02 OS=Rattus norvegicus OX=10116 GN=RGD1310507 PE=1 SV=1 - [A0A0G2K896_RAT]	2	2	3	22	1.38397	0.990952			1.12568	1.46885			1.13137	0.871026			1.20603	1.28968			1.02398	1.36611			1.15776	1.36425			1.38299	1.01507			0.795516	1.1208			1.43471	1.12743			107.784	5	76.6714	6.96143
Q6P688	S-adenosylmethionine synthase OS=Rattus norvegicus OX=10116 GN=Mat2a PE=1 SV=1 - [Q6P688_RAT]	6	1	2	4		1.08472	0.966401			1.12932	1.1655			1.18032	1.1226			1.28479	0.799147			1.17595	0.985373			1.19459	1.32309			0.612819	1.03352			0.75091	0.721593			1.14403	1.01571		24.24		39.6992	5.90967
P11530	Dystrophin OS=Rattus norvegicus OX=10116 GN=Dmd PE=1 SV=2 - [DMD_RAT]	4	4	12	19	0.653076		1.05296		1.05191		0.932645		1.20346		0.792813		1.45664		1.12301		1.47748		0.90648		1.31163		0.802436		0.979582		0.734137		1.04646		1.78545		1.04943		1.10897		125.971		425.563	5.90967
Q6WN19	Reticulon OS=Rattus norvegicus OX=10116 GN=Rtn2 PE=1 SV=1 - [Q6WN19_RAT]	1	1	1	5		1.08181				1.30473				1.47982				1.18039				1.35943				1.23831				1.10532				1.00023				1.02046			67.41		50.9359	4.97021
G3V6A6	Similar to RIKEN cDNA 2610002M06 OS=Rattus norvegicus OX=10116 GN=RGD1566265 PE=1 SV=1 - [G3V6A6_RAT]	1	1	1	1																																					27.78		22.1472	8.104
G3V7E8	Cullin-associated NEDD8-dissociated protein 2 OS=Rattus norvegicus OX=10116 GN=Cand2 PE=4 SV=2 - [G3V7E8_RAT]	4	1	4	4	0.876837				1.14011				1.28711				1.47393				1.40911				1.1607				1.01774				1.17388				1.13789				45.35		133.928	5.57959
P35427	60S ribosomal protein L13a OS=Rattus norvegicus OX=10116 GN=Rpl13a PE=1 SV=2 - [RL13A_RAT]	3	1	1	1	0.671942				1.16273				1.27108				1.46675				1.88819				1.7349				0.746299				1.17484				1.30746				33.99		23.4614	11.019
P13852	Major prion protein OS=Rattus norvegicus OX=10116 GN=Prnp PE=1 SV=2 - [PRIO_RAT]	1	2	2	9	1.07704	1.18667	0.715217	1.2165	0.745612	0.84193	1.05056	1.02205	1.12517	0.930313	0.671273	0.77309	0.868739	0.9962	1.63237	0.634875	0.75044	0.819406	0.4359	0.801154	0.959624	1.28249	0.867307	0.655043	1.11132	1.42969	0.71103	1.0404	0.888288	1.14074	1.05692	0.832588	1.00731	0.61935	0.712633	1.31669	63.64	1	27.7864	9.23193
O35264	Platelet-activating factor acetylhydrolase IB subunit beta OS=Rattus norvegicus OX=10116 GN=Pafah1b2 PE=1 SV=1 - [PA1B2_RAT]	1	1	1	3	1.46885				1.00056				0.771198				0.814475				0.880025				0.814244				1.14014				0.993794				0.969922				56.45		25.5652	5.92236
Q9JMB5	Proteasomal ubiquitin receptor ADRM1 OS=Rattus norvegicus OX=10116 GN=Adrm1 PE=1 SV=2 - [ADRM1_RAT]	1	1	1	1	1.21115				1.10521				0.989142				0.955786				1.14404				0.84717				0.790203				1.08451				1.23591				33.95		42.0758	5.07178
F1M9V7	Aminopeptidase OS=Rattus norvegicus OX=10116 GN=Npepps PE=1 SV=1 - [F1M9V7_RAT]	1	2	3	15	0.701414	0.915174	1.07396	0.63394	1.09831	1.20443	1.09879	1.51939	1.29681	1.28078	0.972312	0.547626	1.32435	1.11404	0.597615	0.98093	1.46414	1.05125	0.928664	1.14646	1.2969	0.913258	1.37483	0.715186	1.1142	0.586197	1.07298	0.834779	1.10585	0.534413	0.802897	1.18029	1.19067	1.19126	1.16716	0.93063	86.26	3	103.279	5.77002
G3V912	Thioredoxin domain containing 13 OS=Rattus norvegicus OX=10116 GN=Tmx4 PE=1 SV=1 - [G3V912_RAT]	1	1	1	8	1.137		1.17514		1.09041		1.17574		1.18718		0.866832		1.20569		1.0057		1.20596		0.970534		0.953413		1.08986		1.2117		1.29002		1.19781		0.771904		1.10752		1.16621		46.36	2	37.517	4.34814
A0A0G2K261	Isoleucyl-tRNA synthetase 2, mitochondrial OS=Rattus norvegicus OX=10116 GN=Iars2 PE=1 SV=1 - [A0A0G2K261_RAT]	1	1	2	4			0.980014				0.999258				0.984288				0.998153				0.715193				1.01649				0.961174				1.08069				0.952648		53.5233		112.605	6.7417
G3V7G0	Cytoplasmic dynein 1 light intermediate chain 1 OS=Rattus norvegicus OX=10116 GN=Dync1li1 PE=1 SV=1 - [G3V7G0_RAT]	2	1	1	3				0.9446				1.29203				1.06662				0.885441				1.55837				0.907732				0.950785				1.11016				1.1038	37.15	2	56.6351	6.29053
B1WC34	Protein kinase C substrate 80K-H OS=Rattus norvegicus OX=10116 GN=Prkcsh PE=1 SV=1 - [B1WC34_RAT]	1	1	2	7		0.90943				0.622121				0.470447				0.856406				0.942903				1.02336				1.5797				1.70244				0.602299			33.02	2	59.1811	4.4751
D4A7H9	CHMP family, member 7 (Predicted), isoform CRA_a OS=Rattus norvegicus OX=10116 GN=Chmp7 PE=1 SV=1 - [D4A7H9_RAT]	1	1	1	1			0.872404				1.40721				1.27482				0.826971				1.37071				1.19341				1.24044				1.31044				1.26724		26.4		50.5121	5.18604
M0R961	Far upstream element-binding protein 2 OS=Rattus norvegicus OX=10116 GN=Khsrp PE=1 SV=1 - [M0R961_RAT]	3	2	3	4																																					43.47		74.1665	6.96143
F1MAA7	Laminin subunit gamma 1 OS=Rattus norvegicus OX=10116 GN=Lamc1 PE=1 SV=1 - [F1MAA7_RAT]	1	1	5	5																																					46.1		177.273	5.22412
P24368	Peptidyl-prolyl cis-trans isomerase B OS=Rattus norvegicus OX=10116 GN=Ppib PE=1 SV=3 - [PPIB_RAT]	1	1	1	8	0.588361	0.718099	1.0632	0.696945	0.789986	0.995923	1.09139	0.994677	0.983646	0.949963	0.993994	1.47337	1.10235	0.96869	0.795913	0.981689	1.15241	1.00139	1.35844	1.04006	0.987124	0.725654	1.01267	1.17251	0.790292	0.625734	0.881003	0.718537	0.93056	1.05169	0.77829	1.09907	1.03696	1.03861	0.998426	0.849699	53	2	23.7875	9.49561
P80067	Dipeptidyl peptidase 1 OS=Rattus norvegicus OX=10116 GN=Ctsc PE=1 SV=3 - [CATC_RAT]	1	1	2	4	2.11721	1.13042		0.980468	1.10245	0.859556		0.76757	0.883756	0.879486		0.988414	0.803923	0.937844		0.78834	0.963266	0.988118		0.777583	0.71764	0.876801		0.753663	1.11715	1.09611		0.919146	1.08501	1.40047		0.961493	1.10535	0.707129		0.974938	37.3	1	52.2017	6.88818
D4ABM5	Mitochondrial ribosomal protein S34 OS=Rattus norvegicus OX=10116 GN=Mrps34 PE=1 SV=1 - [D4ABM5_RAT]	1	1	1	1		0.864094				0.919194				0.937818				0.989674				0.944598				0.792451				1.18044				0.970663				1.06857			43.11		25.7837	10.272
D4A781	Importin 5 OS=Rattus norvegicus OX=10116 GN=Ipo5 PE=1 SV=1 - [D4A781_RAT]	1	1	4	20																																					50.99	3	123.626	4.95752
D3ZFH5	Inter-alpha-trypsin inhibitor heavy chain 2 OS=Rattus norvegicus OX=10116 GN=Itih2 PE=1 SV=3 - [D3ZFH5_RAT]	2	1	2	3																																					43.8	1	92.3113	6.69775
F2Z3R2	Heterogeneous nuclear ribonucleoprotein L OS=Rattus norvegicus OX=10116 GN=Hnrnpl PE=1 SV=1 - [F2Z3R2_RAT]	2	2	2	7	1.24118	0.945502	0.920376	0.742021	1.25067	1.01779	1.35792	1.06978	1.06344	1.00723	0.922261	1.15399	1.14132	0.968496	0.868446	0.836892	1.20273	0.842544	0.787476	0.846537	1.01591	0.919507	0.866627	0.697077	1	0.772814	0.973314	0.994317	0.952682	1.03063	0.889796	1.0393	1.07846	0.907823	0.935683	1.05047	64.33	2	63.9233	8.104
A0A0G2JYC6	RCG62582, isoform CRA_c OS=Rattus norvegicus OX=10116 GN=Ubap2l PE=1 SV=1 - [A0A0G2JYC6_RAT]	2	2	3	6		0.847922	0.994239			0.694079	1.17908			0.554122	1.00289			0.905905	1.53593			1.02472	1.00011			0.683964	0.568719			1.46952	0.822116			2.18973	1.66967			0.460407	1.06495		50.9		112.44	6.59521
Q68FX1	Mannose-6-phosphate isomerase OS=Rattus norvegicus OX=10116 GN=Mpi PE=2 SV=1 - [MPI_RAT]	1	1	1	1																																					34.92		46.3939	6.02393
Q792I0	Protein lin-7 homolog C OS=Rattus norvegicus OX=10116 GN=Lin7c PE=1 SV=1 - [LIN7C_RAT]	5	1	1	1				1.22554				0.945061				1.2121				1.1184				0.847541				1.26326				1.09377				1.00323				1.06298	32.03	1	21.8205	8.42627
D3ZPF0	Four and a half LIM domains 3 OS=Rattus norvegicus OX=10116 GN=Fhl3 PE=1 SV=1 - [D3ZPF0_RAT]	1	1	1	5	0.849976		0.970347	1.03873	0.680235		0.89043		0.856207		0.840913	0.845679	0.852574		1.1637	1.25159	0.732314		0.719576	0.867806	1.04611		0.933014	1.02448	0.957477		1.45702	1.12107	0.915695		1.23576	0.793017	0.933221		1.0441	1.06097	37.06	2	31.7458	6.04932
D3ZCS3	Poly(rC)-binding protein 4 OS=Rattus norvegicus OX=10116 GN=Pcbp4 PE=4 SV=1 - [D3ZCS3_RAT]	1	1	1	1			1.03371				1.21088				1.02226				0.854463				0.946523				1.05012				1.29609				0.969684				0.809944		32.45		41.4267	8.1626
P85973	Purine nucleoside phosphorylase OS=Rattus norvegicus OX=10116 GN=Pnp PE=1 SV=1 - [PNPH_RAT]	1	1	1	3	0.995496		1.19188		1.0238		1.11009		1.34304		1.24686		1.28383		0.673245		1.43637		1.14486		1.11524		1.60631		0.884698		1.28531		0.972124		0.707365		1.17569		0.698717		58.86		32.281	6.93213
Q66H09	Tetratricopeptide repeat domain 1 OS=Rattus norvegicus OX=10116 GN=Ttc1 PE=1 SV=1 - [Q66H09_RAT]	1	1	1	7				1.19768				0.717571				1.17596				0.905935				0.859759				1.18511				1.17247				0.726763				1.10138	32.21	2	33.289	4.86865
C0JPT7	Filamin A OS=Rattus norvegicus OX=10116 GN=Flna PE=1 SV=1 - [C0JPT7_RAT]	1	2	9	26	0.660448	1.06094		0.437311	0.813459	1.52237		1.44171	1.11497	0.825765		0.533441	1.81912	1.39618		0.854542	1.53853	0.719202		1.61276	1.31913	0.848344		0.435651	0.834792	0.427233		0.68934	1.15546	0.441055		1.77977	1.46451	2.5094		0.935796	107.824	6	280.32	6.03662
P10252	CD48 antigen OS=Rattus norvegicus OX=10116 GN=Cd48 PE=1 SV=1 - [CD48_RAT]	1	1	1	1				1.3529				0.708676				1.06112				1.12881				0.939811				0.896088				1.32474				0.975581				1.09052	31.09	1	27.6622	7.82568
Q6MG61	Chloride intracellular channel protein 1 OS=Rattus norvegicus OX=10116 GN=Clic1 PE=1 SV=1 - [CLIC1_RAT]	1	1	1	3			1.11255				0.951554				1.03124				0.914805				0.955086				1.03546				0.971356				0.742133				1.19638		30.84	1	26.9638	5.17334
Q5PQX1	Torsin-1A-interacting protein 1 OS=Rattus norvegicus OX=10116 GN=Tor1aip1 PE=1 SV=1 - [TOIP1_RAT]	1	1	1	3		1.14735		0.868382		0.986407		1.02685		1.40391		0.834627		1.58918				0.89853				1.05726		0.863096		1.57273		1.02837		1.2236				1.26966		0.645583	34.21	1	65.6089	6.41748
P97849	Long-chain fatty acid transport protein 1 OS=Rattus norvegicus OX=10116 GN=Slc27a1 PE=2 SV=1 - [S27A1_RAT]	2	2	2	6		1.27164	1.17081	0.527963		1.16114	1.3859	1.17463		1.09391	0.873637	0.525688		0.967024	0.394169	0.718062		1.49972	0.710492	1.34568		0.938896	0.82012	0.585301		0.620735	1.33851	0.804512		0.578027	1.20665	1.24211		1.04492	0.947808	0.737266	74.1733	1	71.2377	8.45557
M0RD75	40S ribosomal protein S6 OS=Rattus norvegicus OX=10116 GN=Rps6 PE=1 SV=1 - [M0RD75_RAT]	2	1	1	4	0.770339	0.811881			1.00345	1.17662			1.14778	1.3118			1.25105	1.11687			1.28288	1.17534			1.1382	0.751334			0.914864	0.644316			0.945967	0.54431			1.15395	1.37174			41.35		28.4039	10.8433
D3ZA84	Talin 2 OS=Rattus norvegicus OX=10116 GN=Tln2 PE=1 SV=3 - [D3ZA84_RAT]	4	2	7	18	0.991447		1.03932	0.592585	0.738089		0.955076	1.423	0.949661		1.02793	0.460854	1.19174		0.356641	0.858119	1.39356		0.670366	1.43332	1.40574		1.44266	0.489599	0.903777		1.23515	0.834115	1.07928		0.940557	1.23982	1.13963		0.833657	0.83801	87.63	3	271.514	5.5542
B1WBY5	DnaJ (Hsp40) homolog, subfamily C, member 11 OS=Rattus norvegicus OX=10116 GN=Dnajc11 PE=1 SV=1 - [B1WBY5_RAT]	1	1	1	6			1.61095	0.831001			1.06833	1.44747			1.10131	0.662898			0.669935	1.10124			1.10641	1.46201			1.50968	0.960023			1.39493	1.14751			1.06761	1.37325			1.65735	1.03158	41.27	2	63.1658	8.32373
O08590	Membrane primary amine oxidase OS=Rattus norvegicus OX=10116 GN=Aoc3 PE=1 SV=4 - [AOC3_RAT]	2	1	3	5	1.36292				1.02488				1.26304				1.42217				1.17076				1.11768				0.901139				0.901766				1.2116				43.69	1	84.9275	6.49365
P55159	Serum paraoxonase/arylesterase 1 OS=Rattus norvegicus OX=10116 GN=Pon1 PE=1 SV=3 - [PON1_RAT]	1	1	1	2		1.26253				1.76101				1.12864				0.953788				0.620759				0.994634				1.25263				0.94218				0.860707			30.17		39.3331	5.22412
Q2KIH2	TREMBL:Q2KIH2;Q68RU0 (Bos taurus) Ovarian and testicular apolipoprotein N	1	1	1	3				1.21671				0.480327				1.39904				0.777027				0.433616				1.49148				1.1967				0.738293				0.54792	29.96	3	29.0721	5.66846
Q9JJ31	Cullin-5 OS=Rattus norvegicus OX=10116 GN=Cul5 PE=1 SV=3 - [CUL5_RAT]	2	1	2	2																																					37.18		90.8323	7.94287
Q99376	Transferrin receptor protein 1 (Fragment) OS=Rattus norvegicus OX=10116 GN=Tfrc PE=1 SV=1 - [TFR1_RAT]	2	2	2	4			1.09562				0.77742				1.20288				0.444037				1.11094				1.38508				1.51441				0.612924				1.14874		65.6913		70.1086	6.60986
G3V9X2	G-protein signalling modulator 1 (AGS3-like, C. elegans), isoform CRA_c OS=Rattus norvegicus OX=10116 GN=Gpsm1 PE=1 SV=1 - [G3V9X2_RAT]	2	1	2	3	1.59119				1.24256				0.72953				0.519618				0.614733				0.616791				1.00462				0.73633				0.617763				26.7		74.3943	6.30322
Q5XIP0	DnaJ (Hsp40) homolog, subfamily B, member 4 OS=Rattus norvegicus OX=10116 GN=Dnajb4 PE=1 SV=1 - [Q5XIP0_RAT]	1	1	1	1																																					35.23		37.7982	8.5874
A0A0G2JYW3	Clathrin light chain OS=Rattus norvegicus OX=10116 GN=Clta PE=1 SV=1 - [A0A0G2JYW3_RAT]	3	1	1	2																																					27.07	1	25.5644	4.4751
Q6TXE9	Glutamyl-prolyl-tRNA synthetase OS=Rattus norvegicus OX=10116 GN=Eprs PE=1 SV=1 - [Q6TXE9_RAT]	2	1	4	17		1.05901				1.09731				1.03432				1.3473				1.56778				0.917613				0.957269				1.38612				1.19424			31.52		166.676	7.50342
Q64232	Very-long-chain enoyl-CoA reductase OS=Rattus norvegicus OX=10116 GN=Tecr PE=1 SV=1 - [TECR_RAT]	1	1	1	4	0.650802	1.03523	1.54063	0.683513	1.04051	0.941159	1.44929	1.05939	0.877161	0.884782	1.3226	0.689824	1.34399	0.886491	0.769804	1.03646	1.15975	1.02129	1.36947	1.06029	1.15074	0.888172	1.42584	0.922034	0.795893	1.09108	1.31458	0.89096	1.1309	0.949562	0.943079	1.17153	1.01274	1.04719	1.56251	1.01211	45.78	1	36.0988	9.5542
P11348	Dihydropteridine reductase OS=Rattus norvegicus OX=10116 GN=Qdpr PE=1 SV=1 - [DHPR_RAT]	1	1	1	4	1.08164	0.977828	1.12736		0.868873	1.20517	1.15318		0.993094	1.28696	0.832209		1.19964	1.02164	0.786235		1.13869	1.13912	0.956543		1.07489	0.99905	1.10784		0.964068	0.813352	1.12726		1.06806	0.971334	0.806066		1.10759	1.06912	1.02995		30.78	1	25.5359	7.81104
D4A8Y1	Uncharacterized protein OS=Rattus norvegicus OX=10116 PE=1 SV=1 - [D4A8Y1_RAT]	1	1	2	6		0.791802		0.850148		0.972253		1.31973		1.03369		1.13665		0.824495		0.969008		0.967911		1.21921		0.733356		0.982473		0.598201		0.967956		1.15362		1.45152		1.20586		1.20803	49.15	2	70.952	9.40771
P80299	Bifunctional epoxide hydrolase 2 OS=Rattus norvegicus OX=10116 GN=Ephx2 PE=1 SV=1 - [HYES_RAT]	2	1	1	1																																					30.33	1	62.2996	6.18896
Q62733	Lamina-associated polypeptide 2, isoform beta OS=Rattus norvegicus OX=10116 GN=Tmpo PE=1 SV=3 - [LAP2_RAT]	1	1	1	8				0.951333				0.998698				1.25423				0.89226				1.21659				0.767321				1.07525				1.00373				0.96777	42.38	2	50.2471	9.39307
D3ZXI2	Uncharacterized protein OS=Rattus norvegicus OX=10116 PE=4 SV=2 - [D3ZXI2_RAT]	4	1	1	1																																					27.49		27.2788	7.75244
B5DEH0	LIM domain-containing protein 1 OS=Rattus norvegicus OX=10116 GN=Limd1 PE=1 SV=1 - [LIMD1_RAT]	1	1	1	1		1.1956				0.953146				1.24015				1.76073				1.37898				0.803502				1.10504				1.61749				1.06347			34.3		71.3469	6.29053
[truncated: 82 more rows]
